# Supplementary material for: A split-GAL4 driver line resource for Drosophila neuron types
Source: eLife journal article supplement (doi:10.7554/elife.98405), 2024-07-30

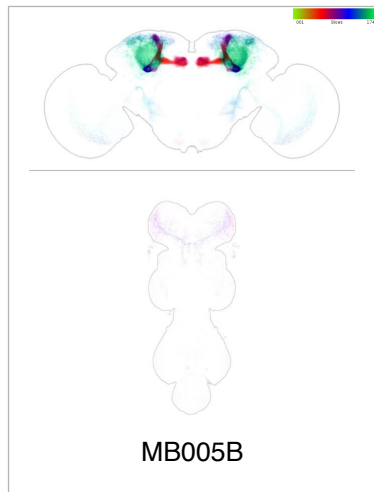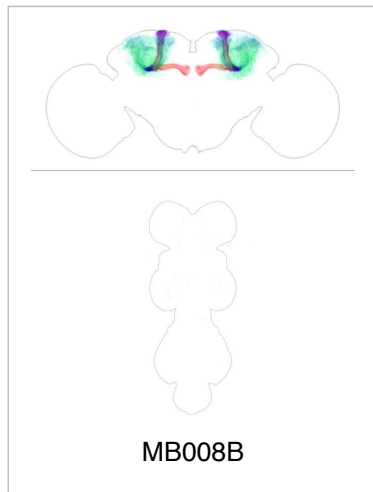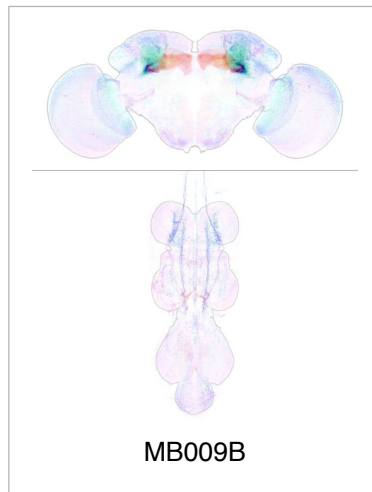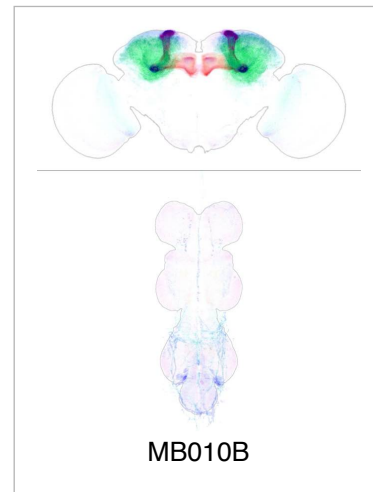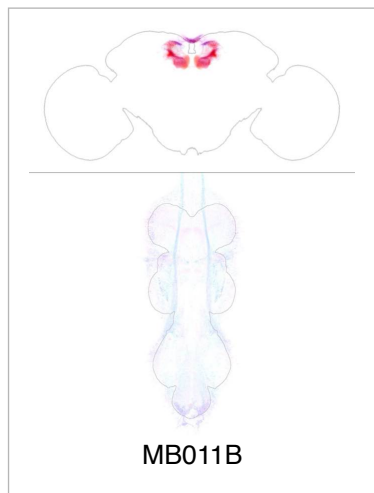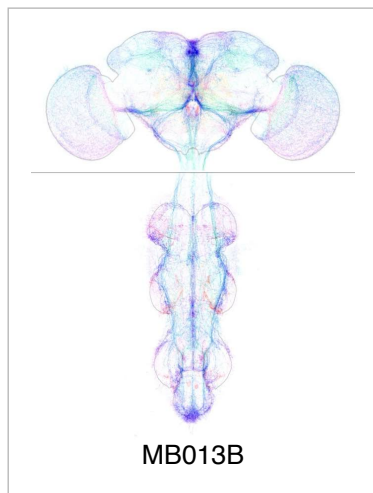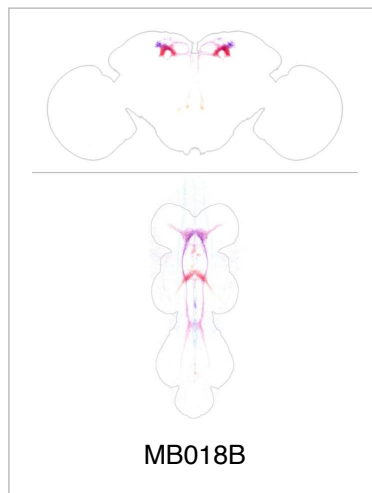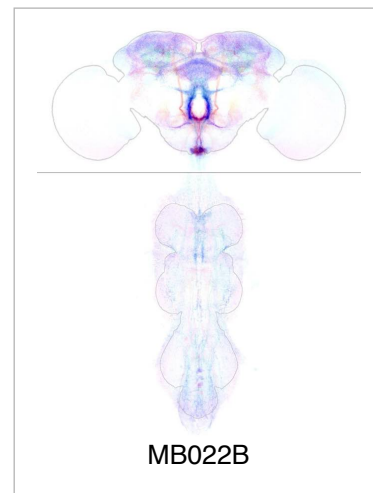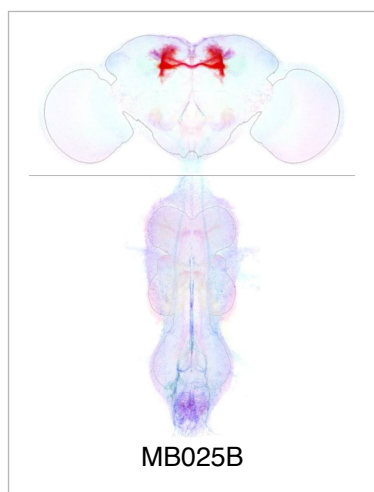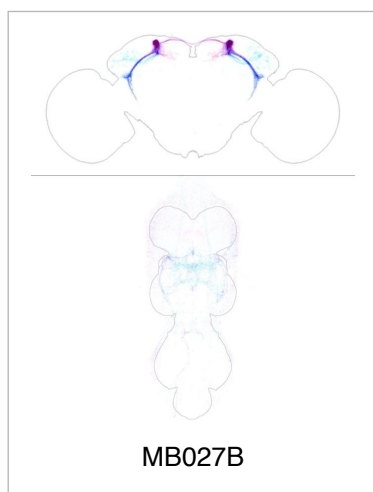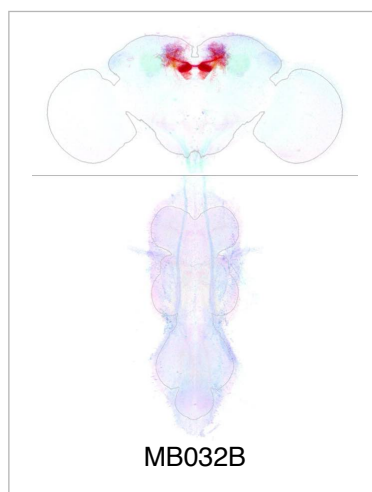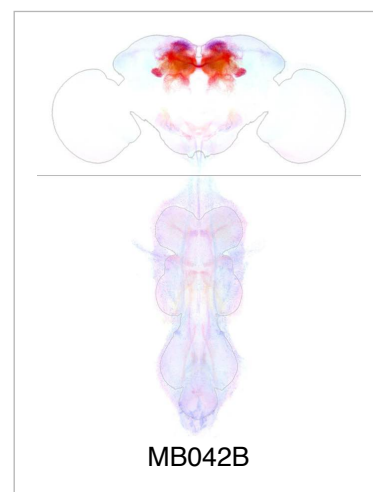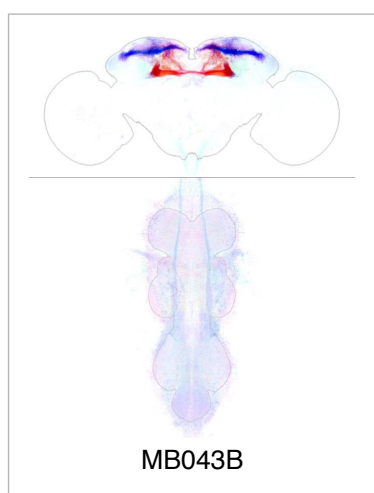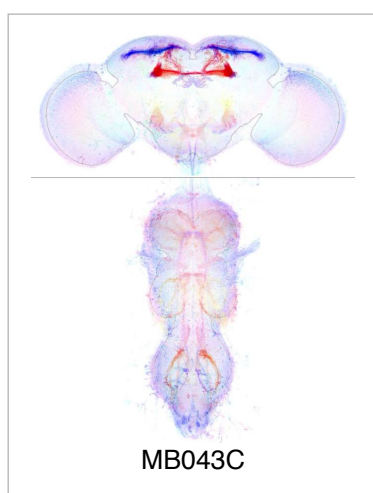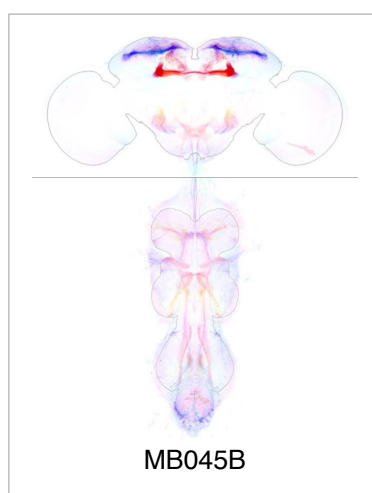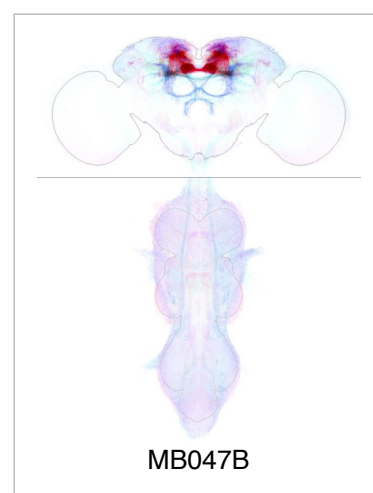

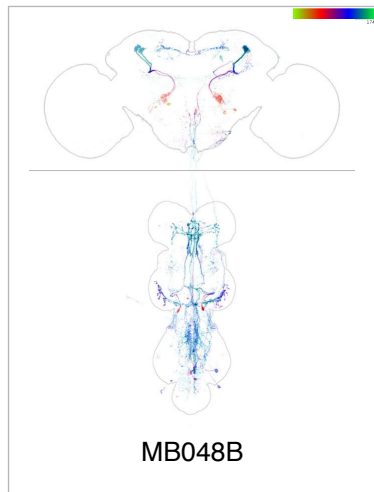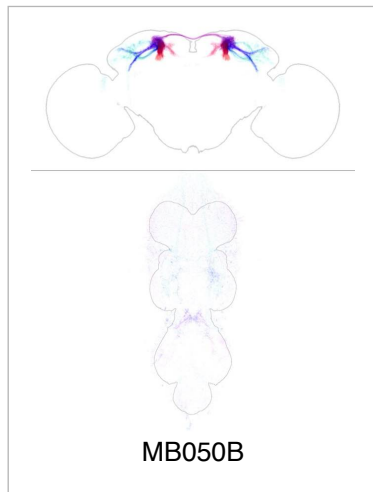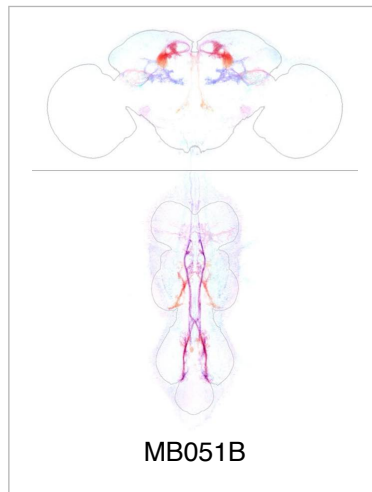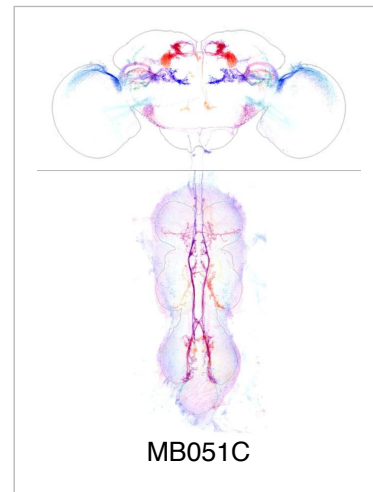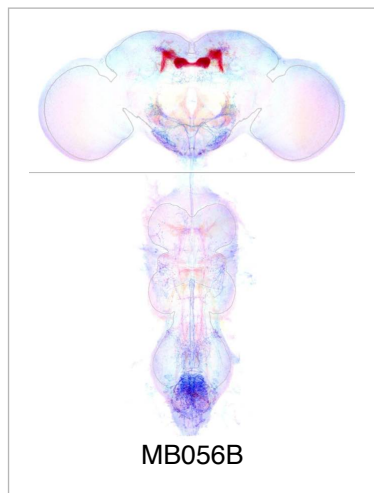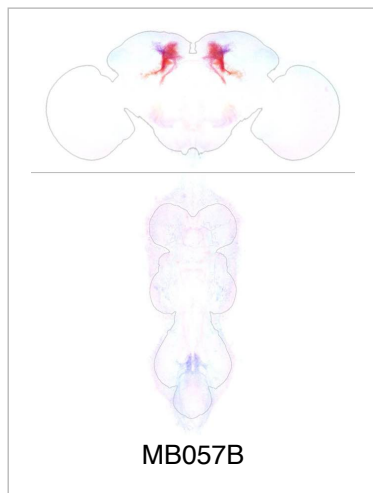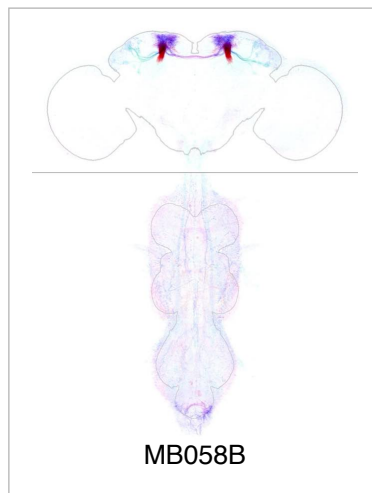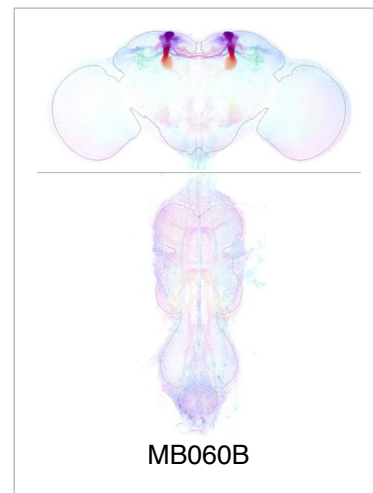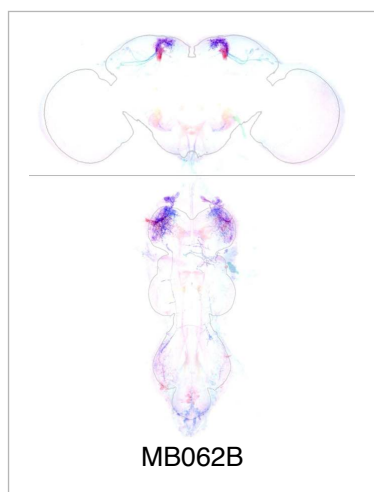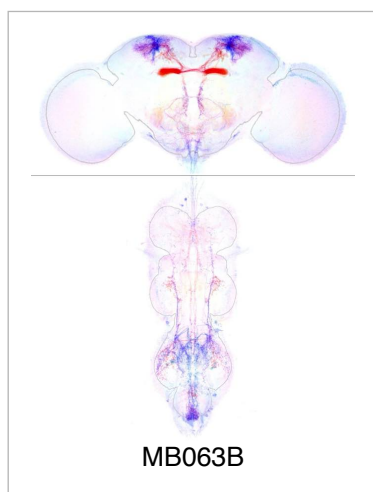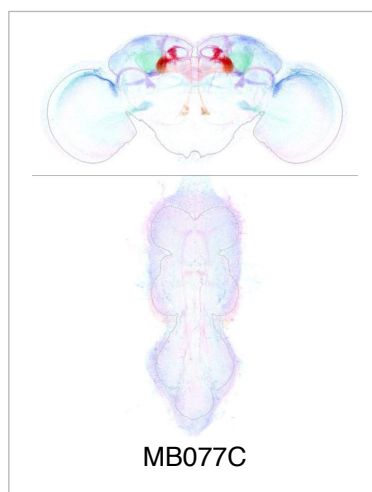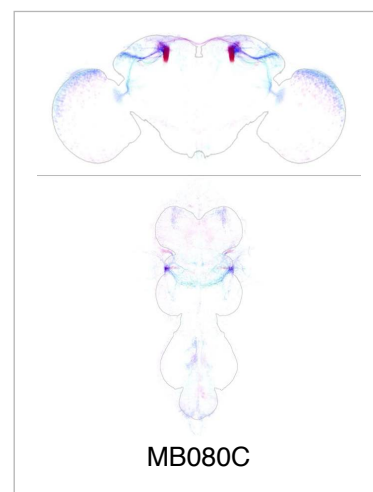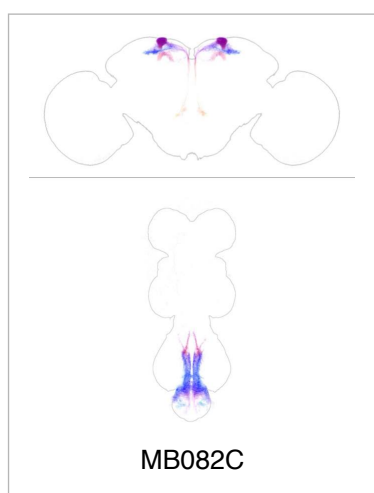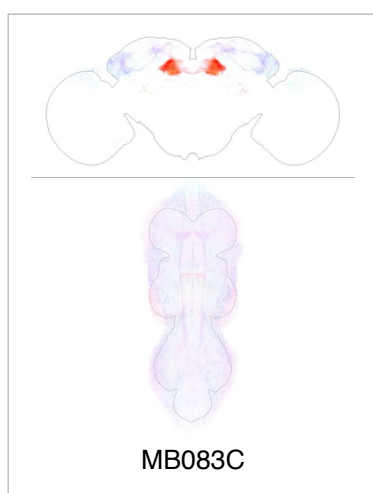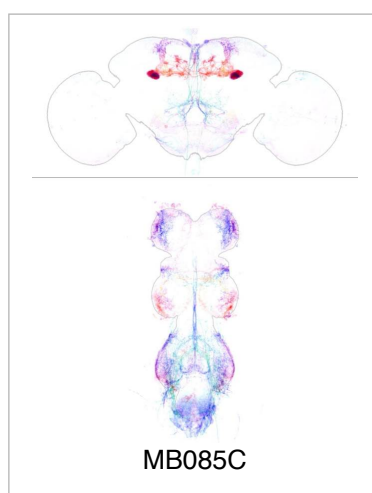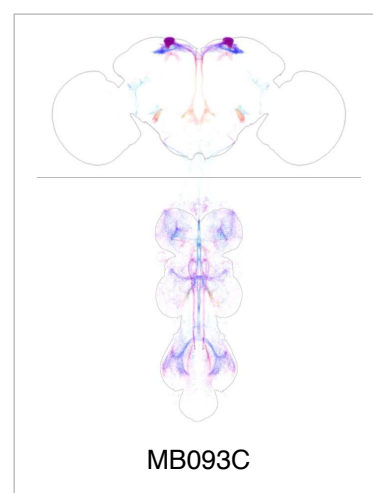

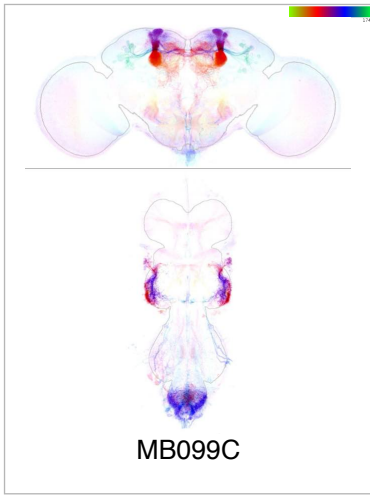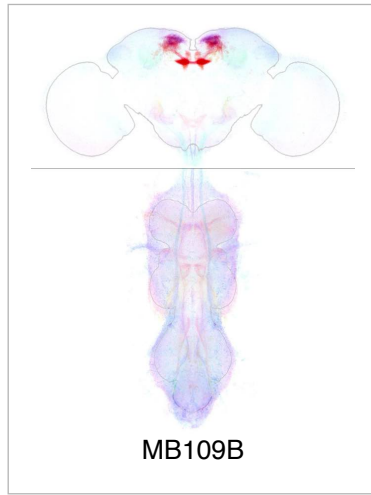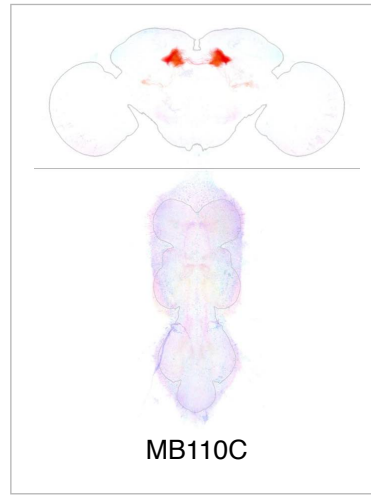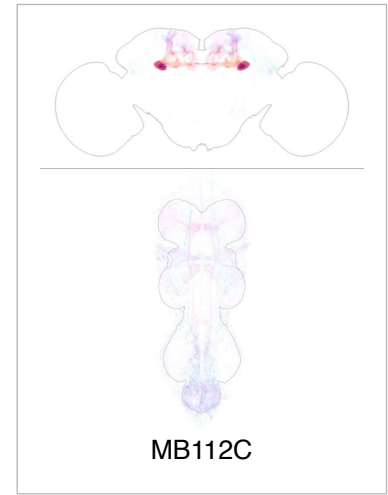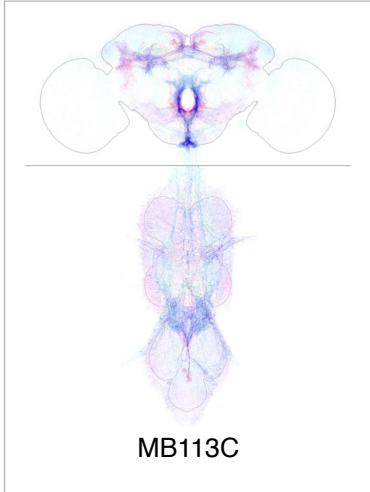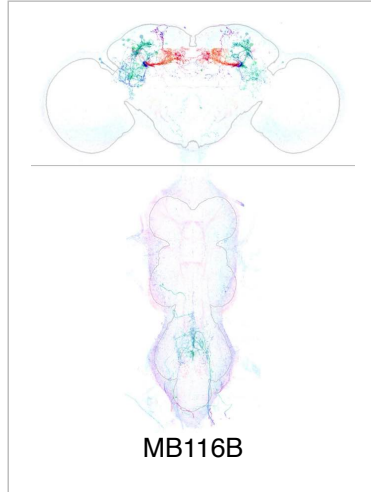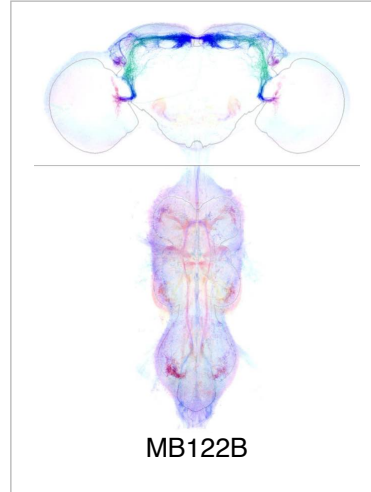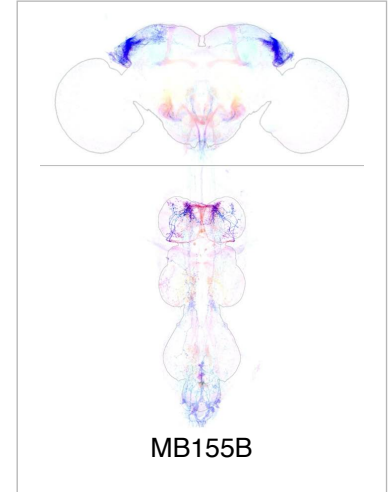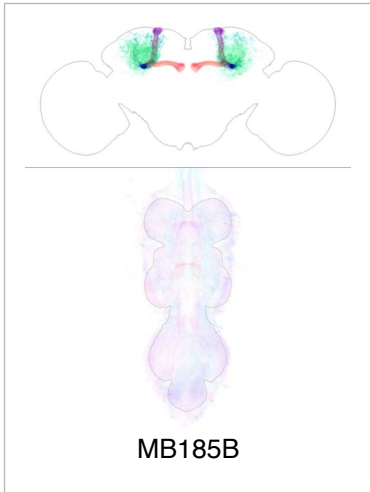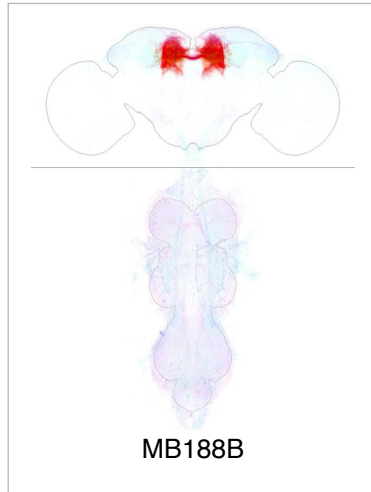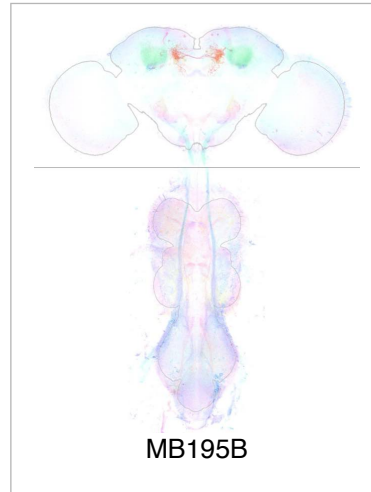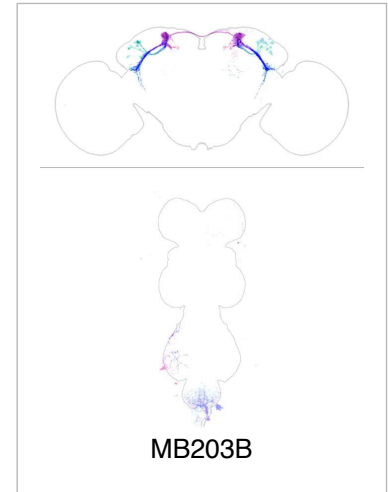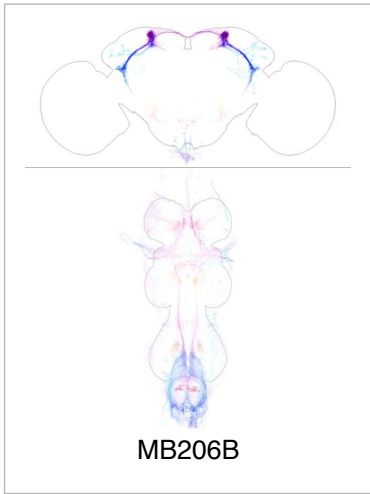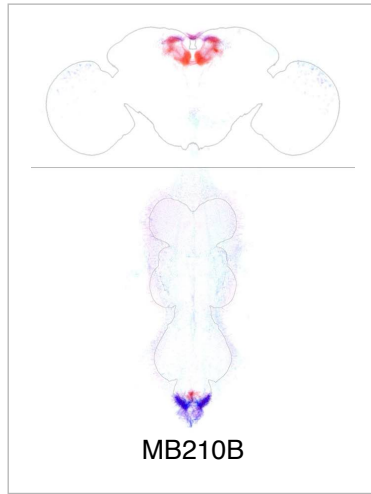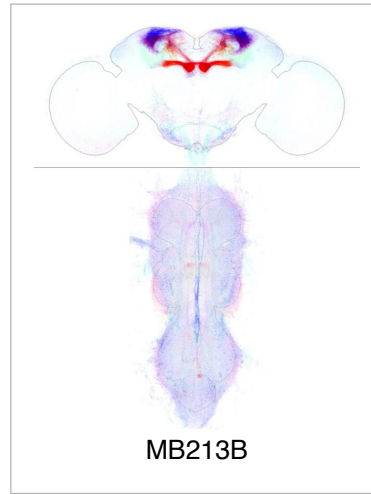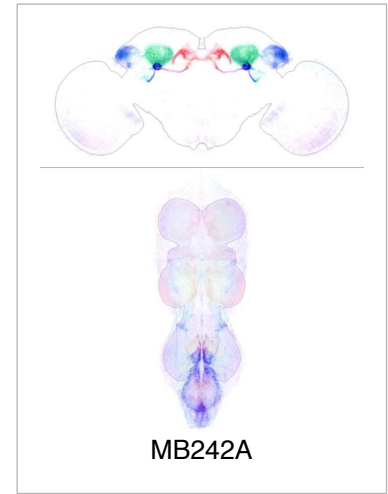

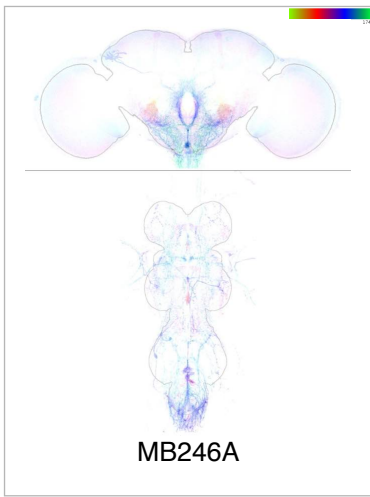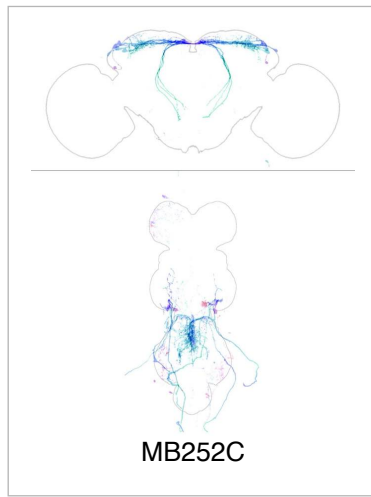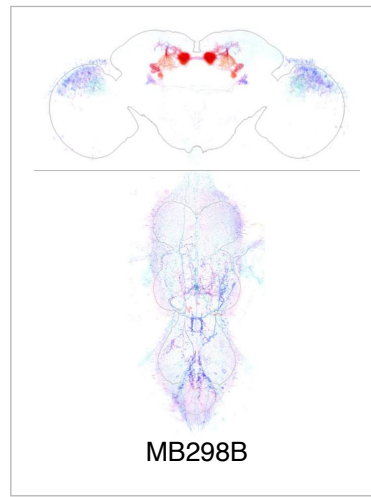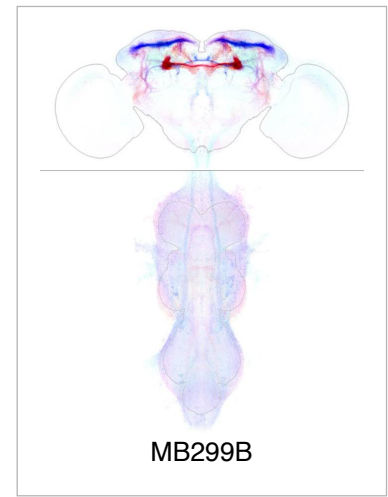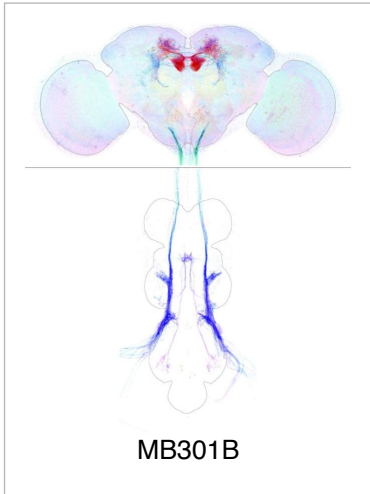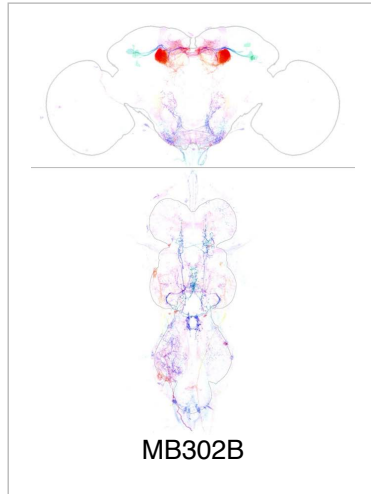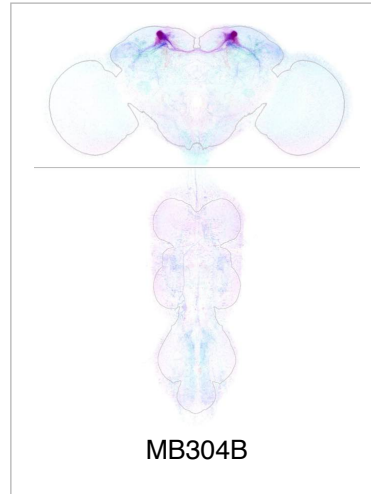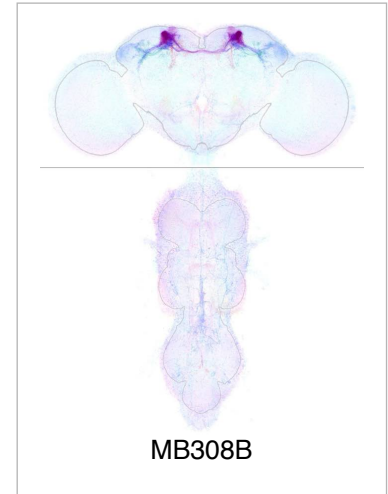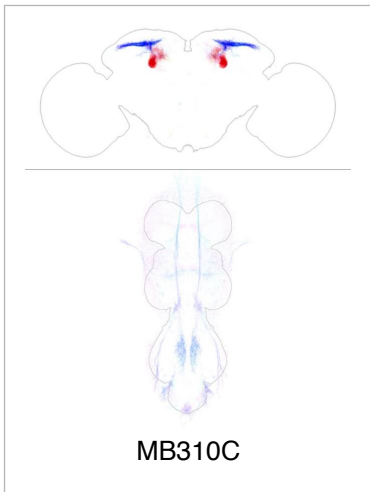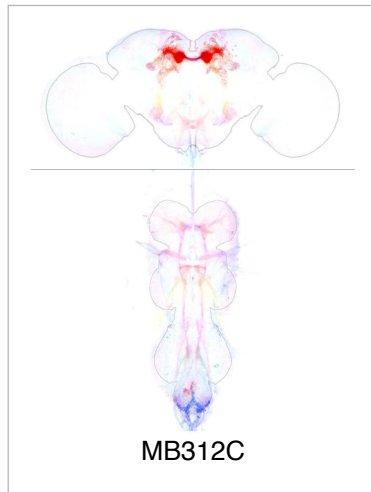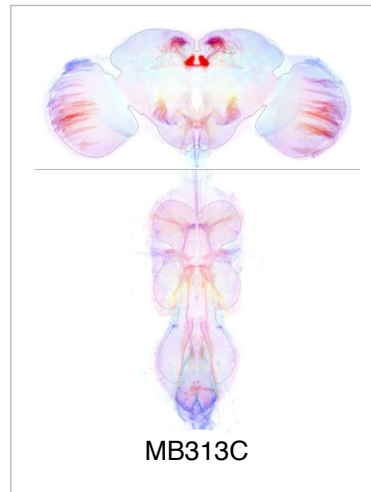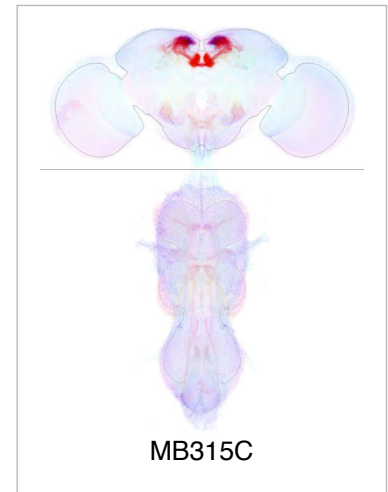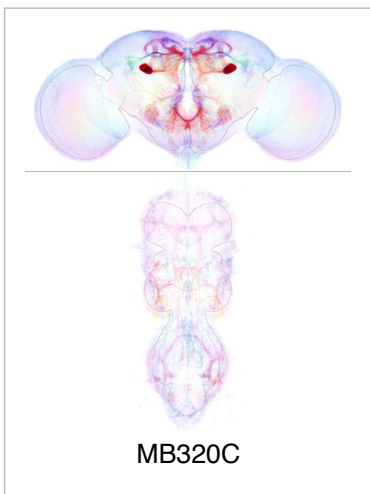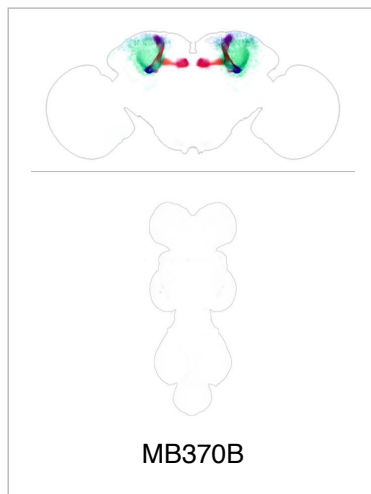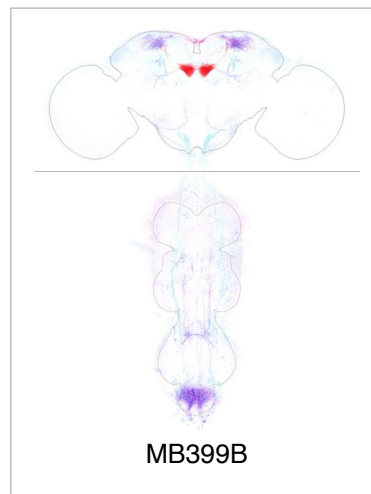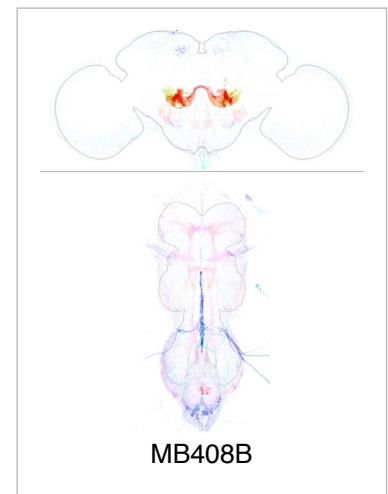

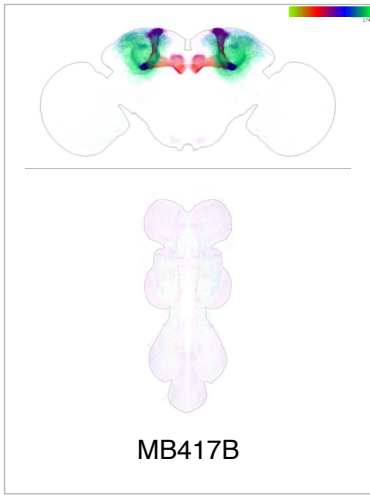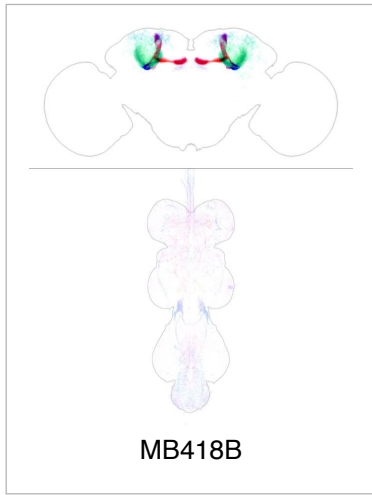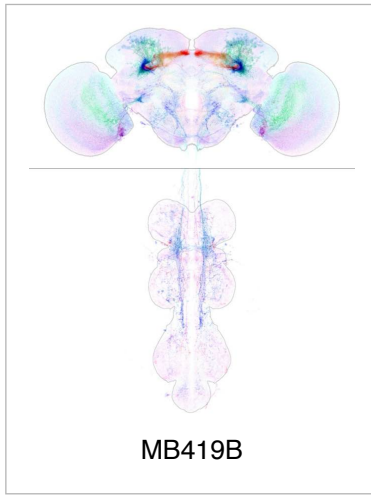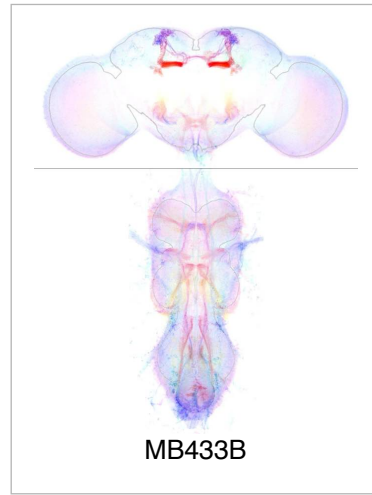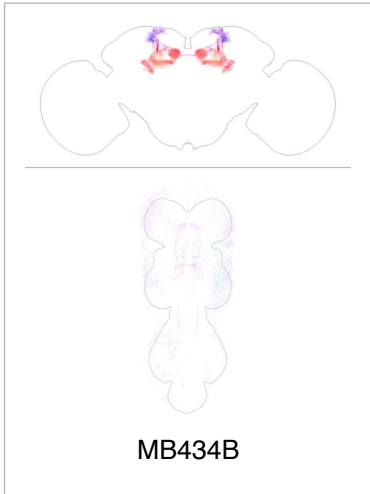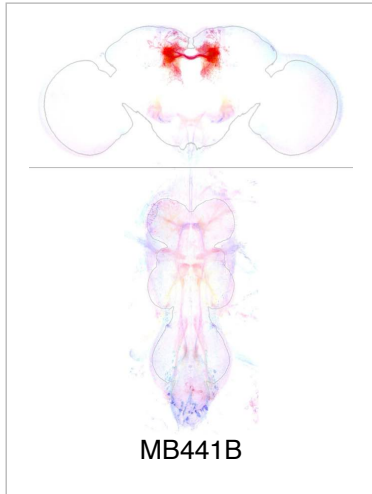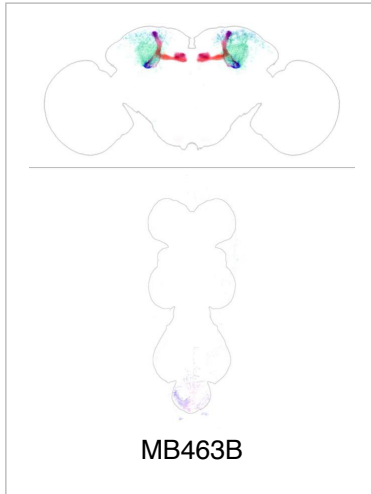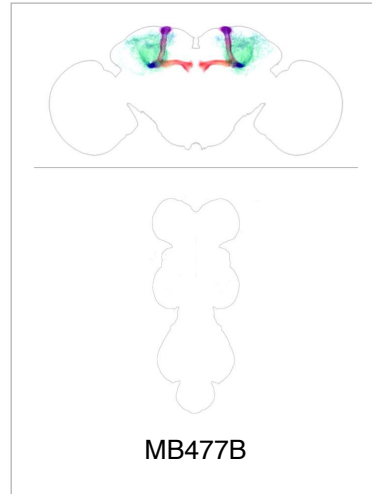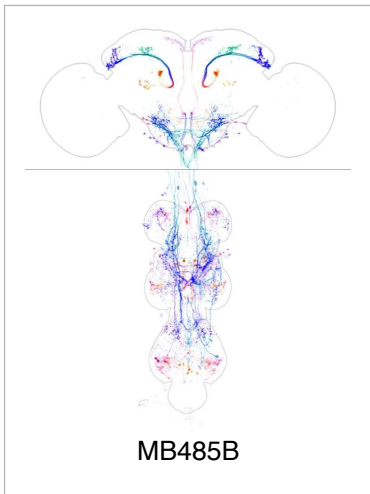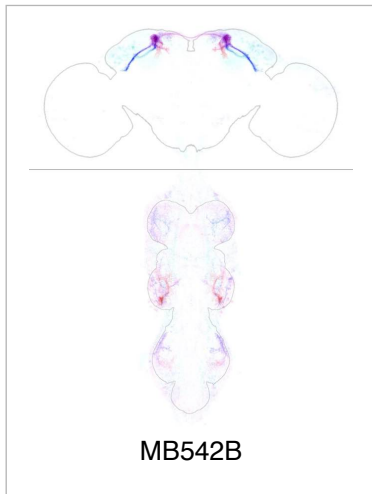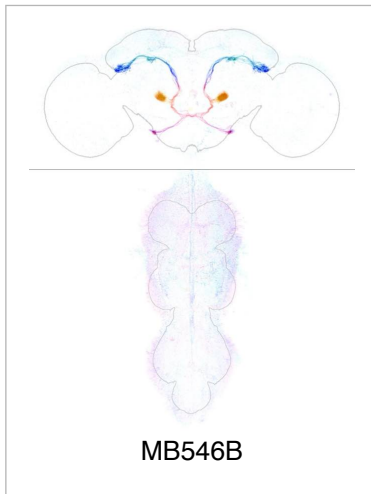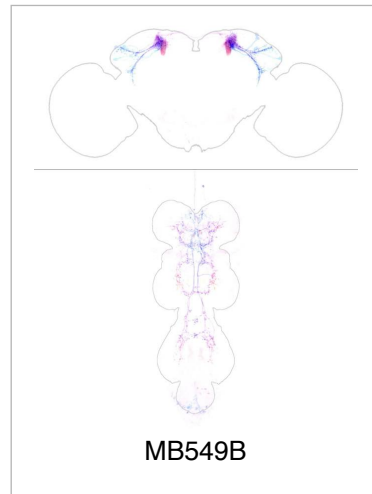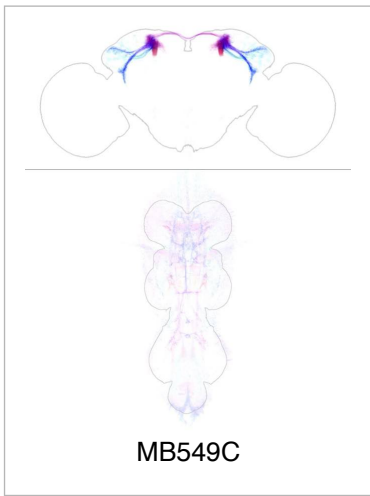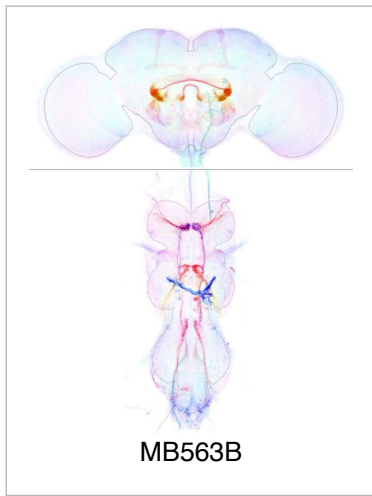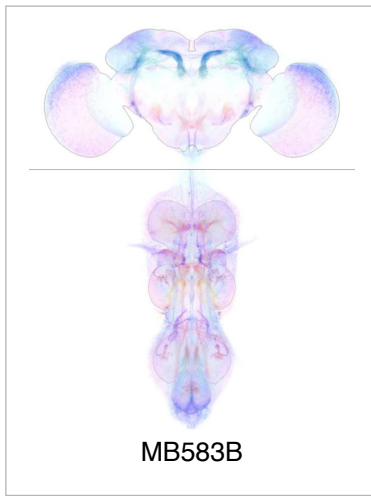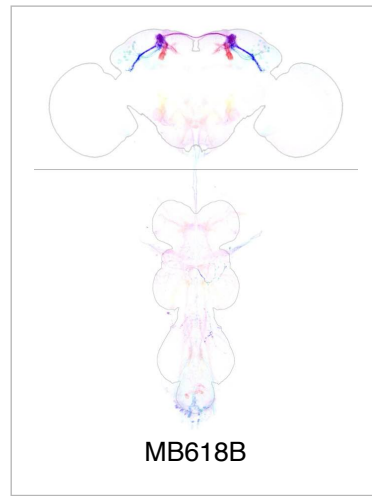

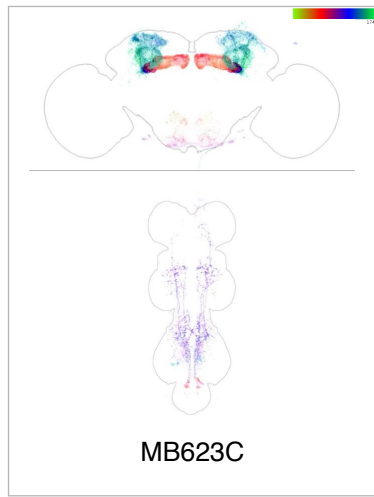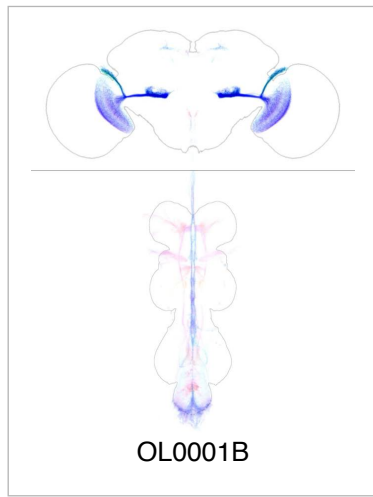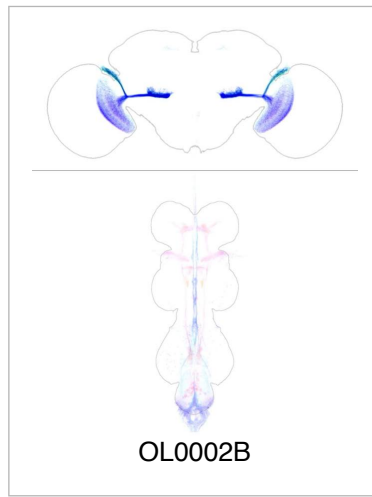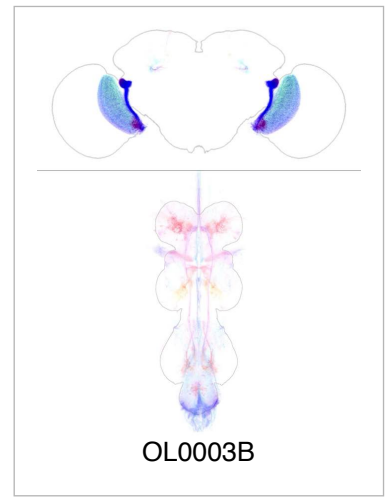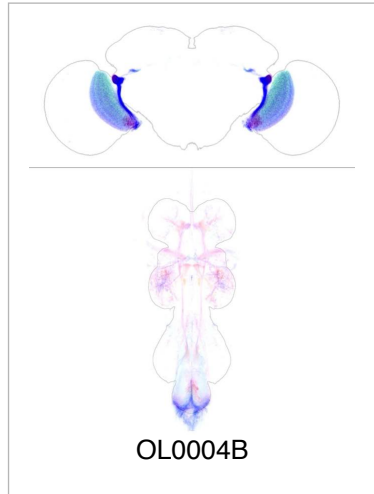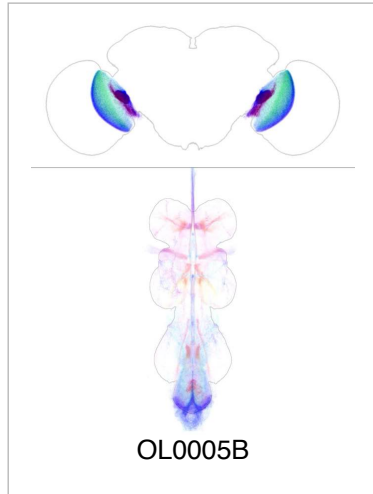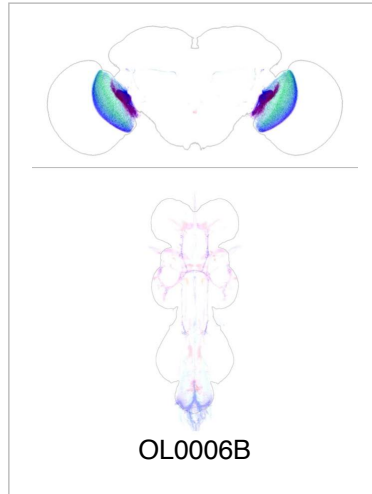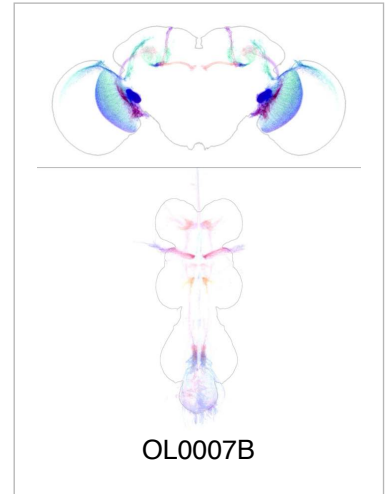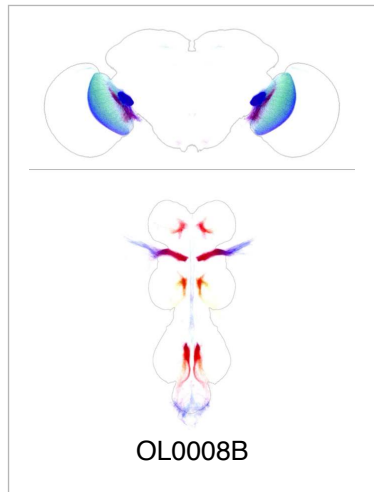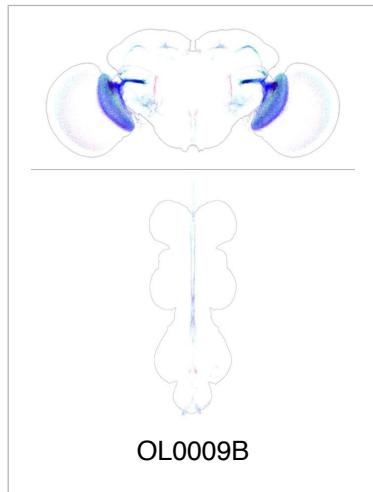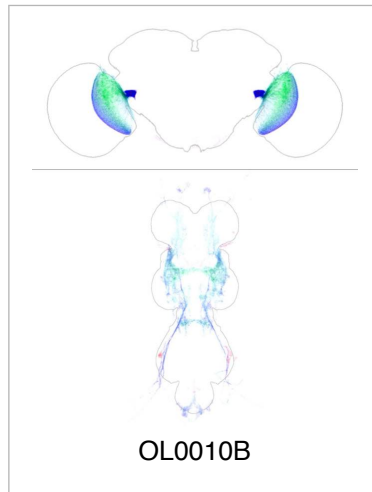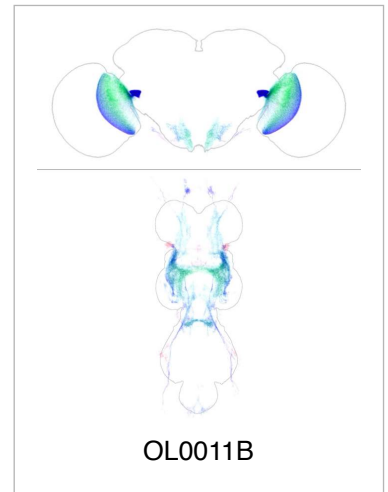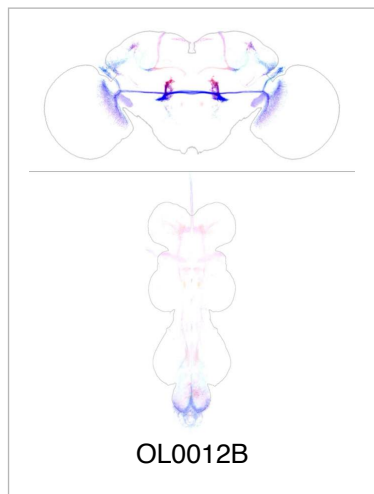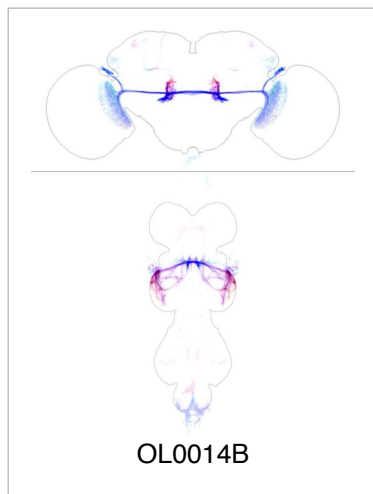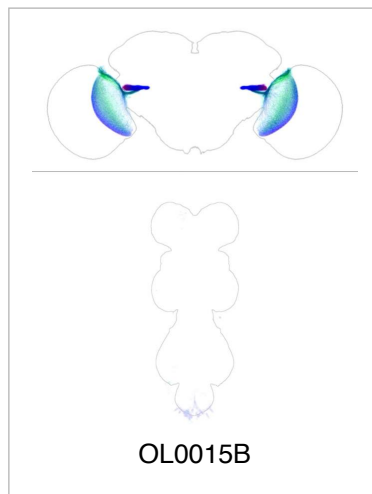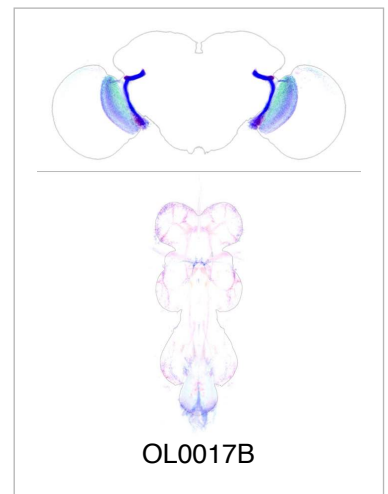

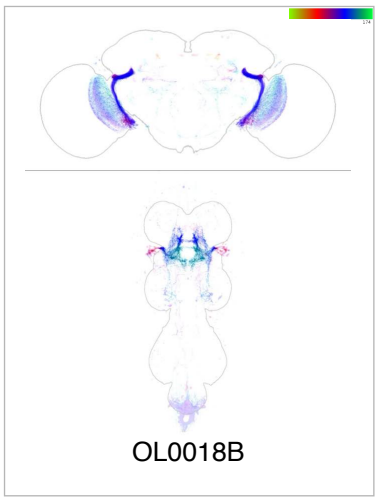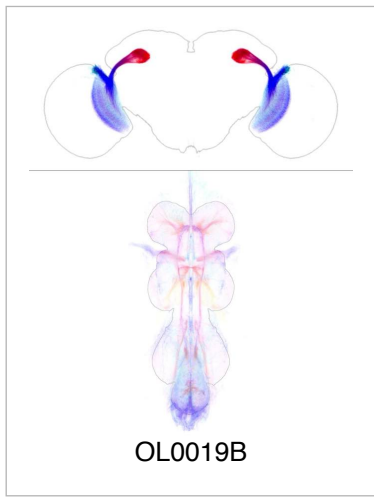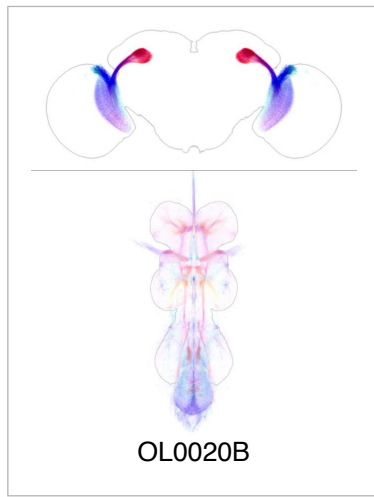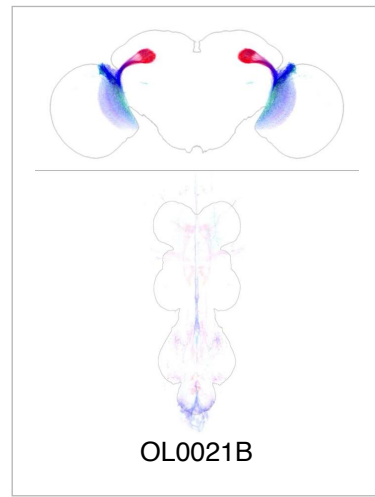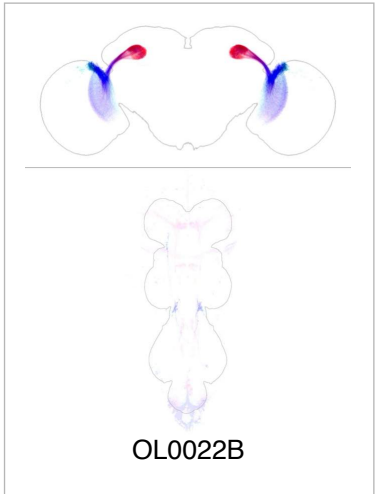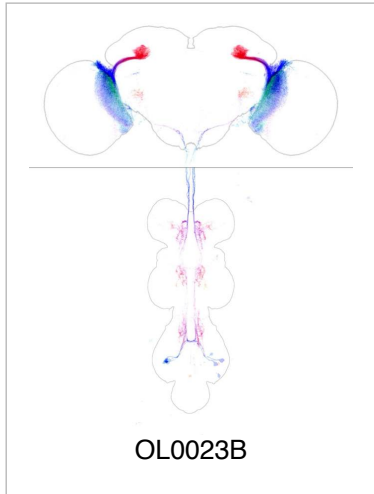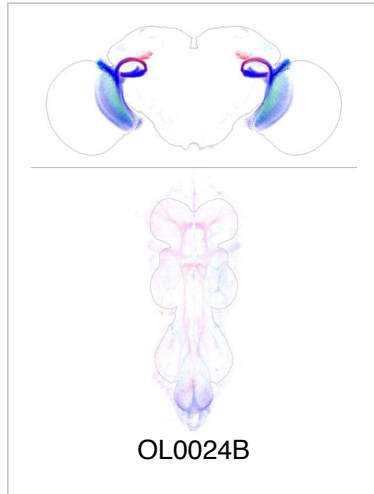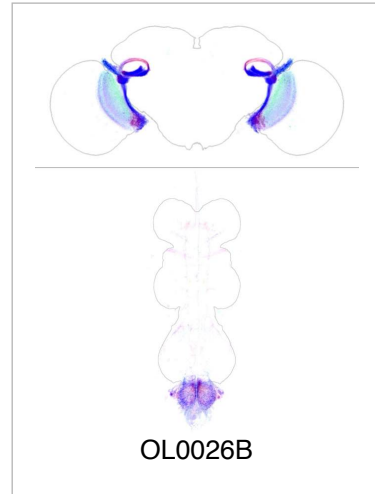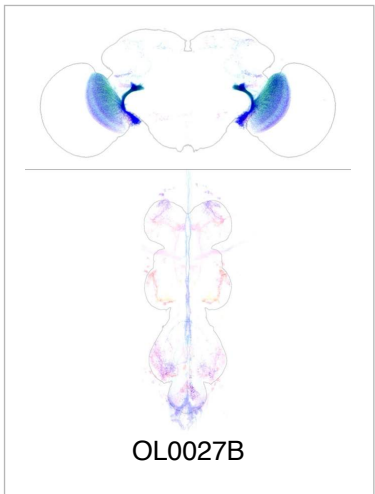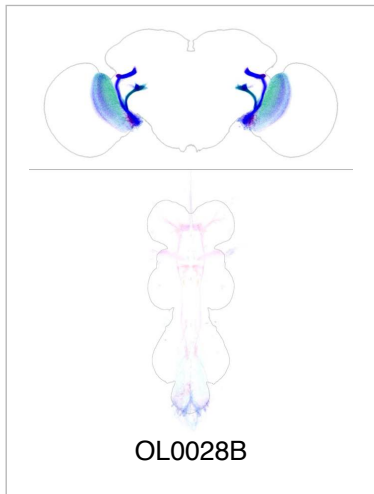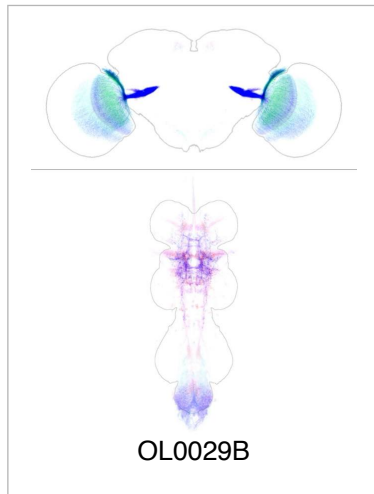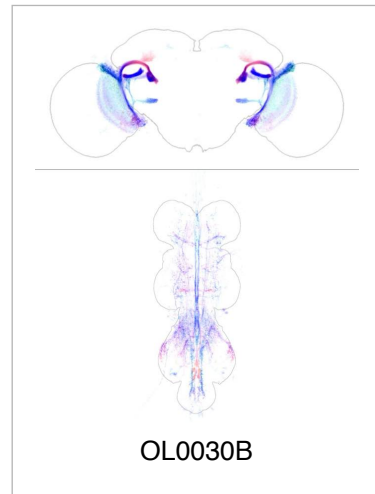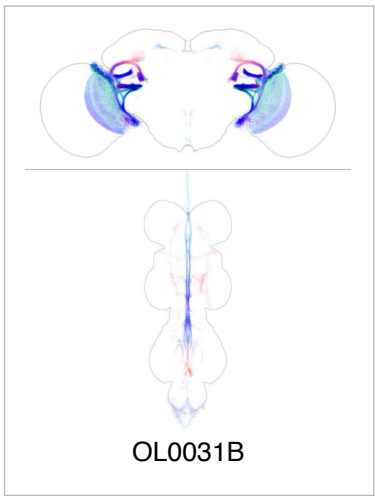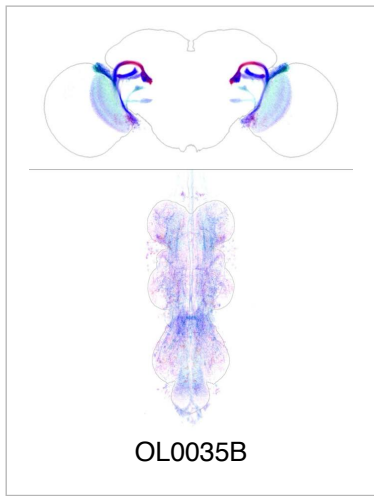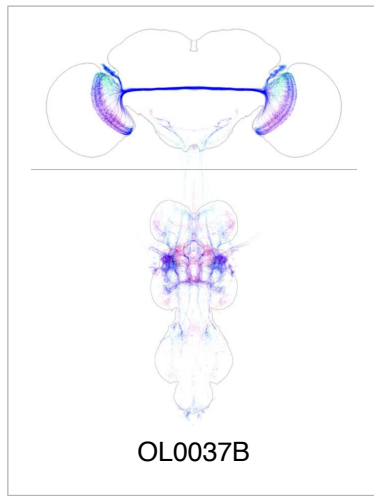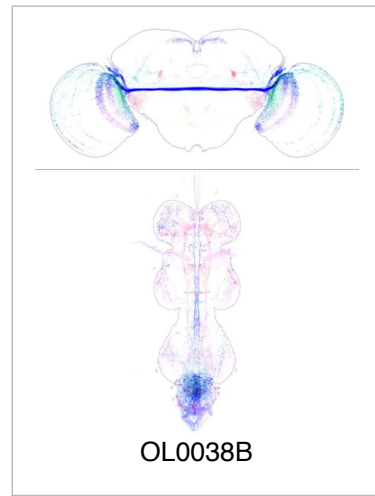

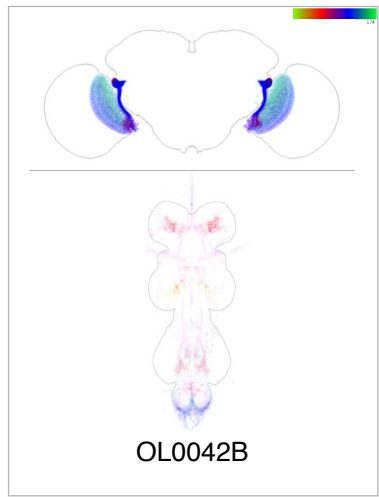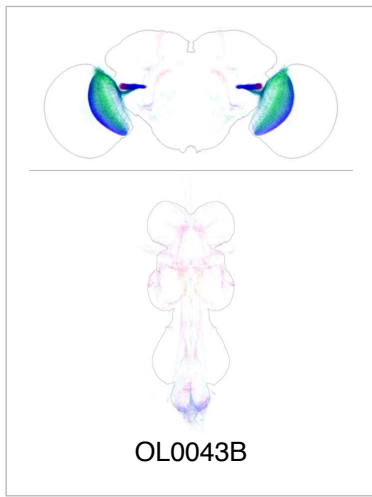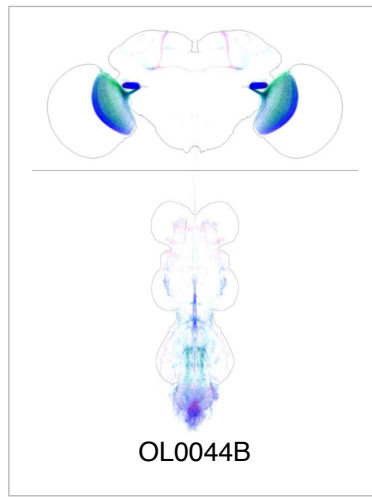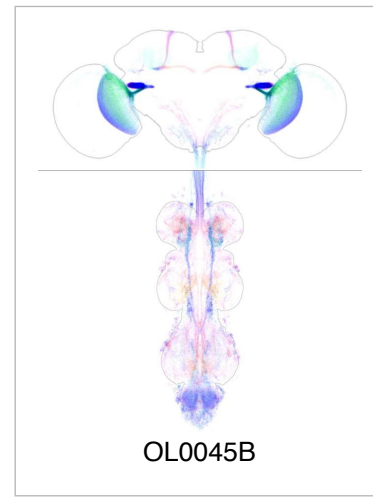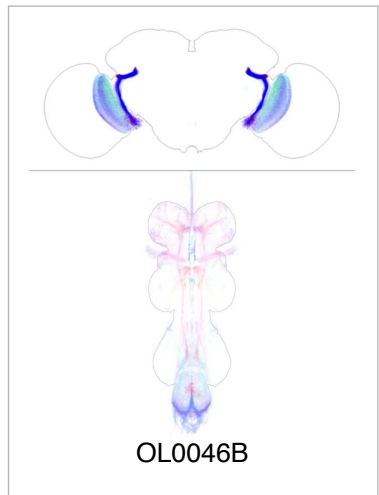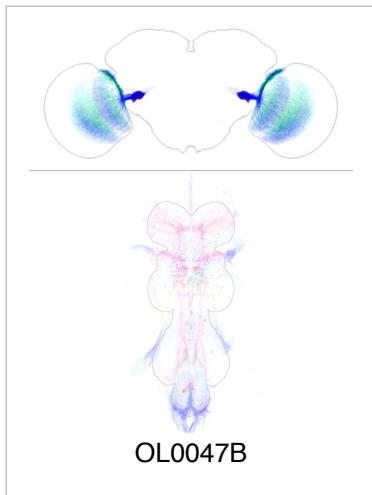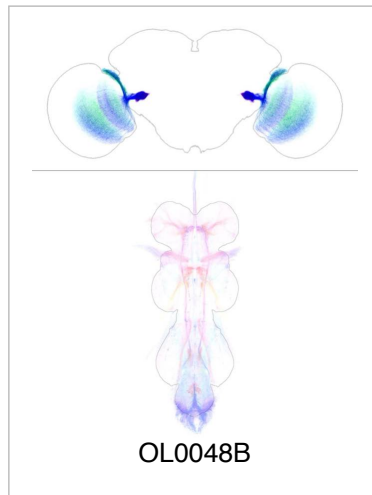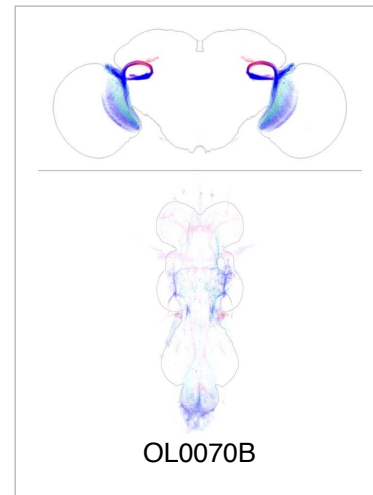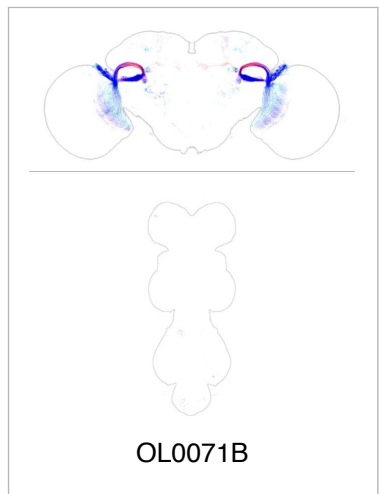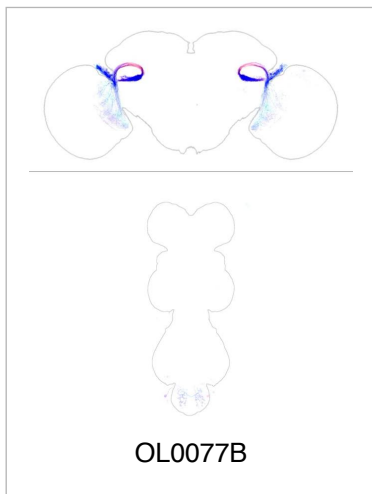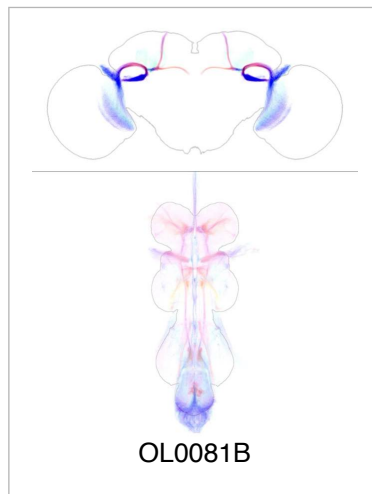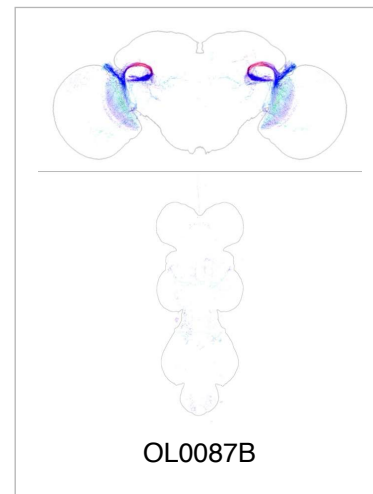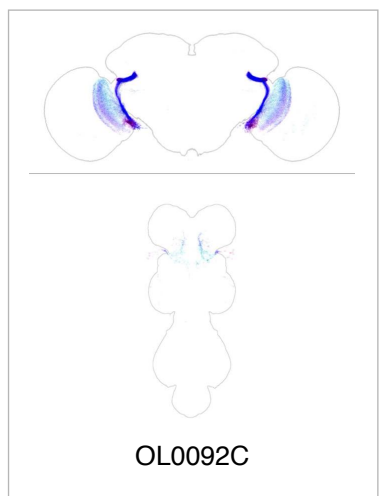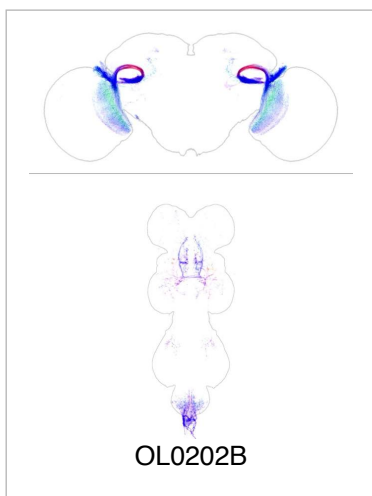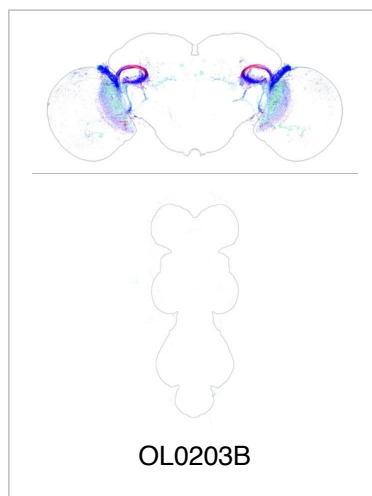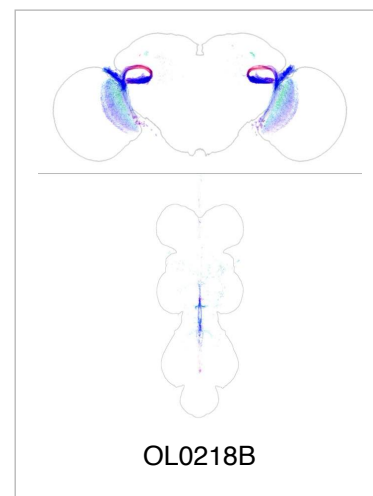



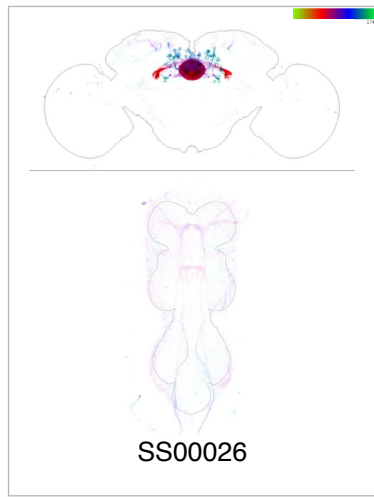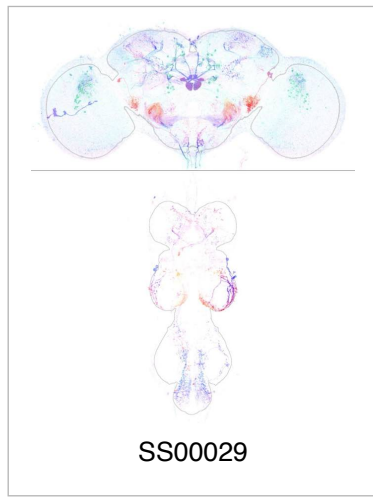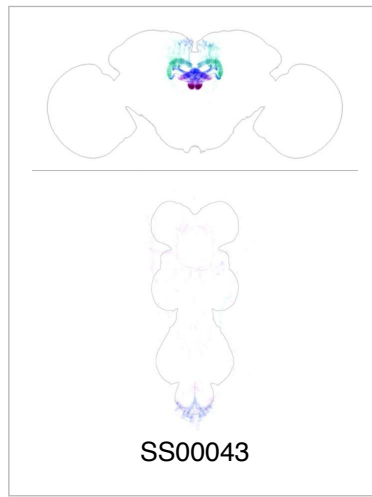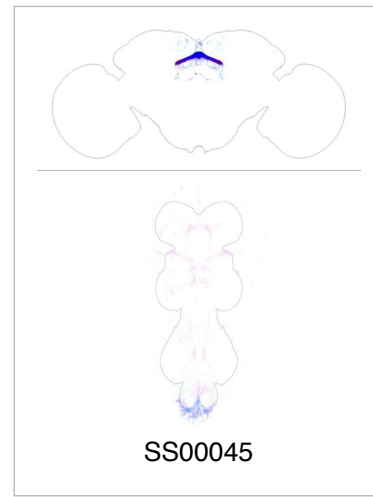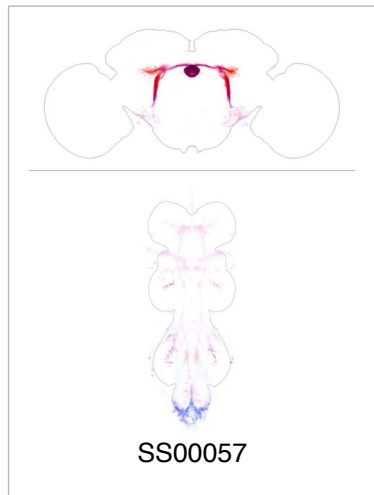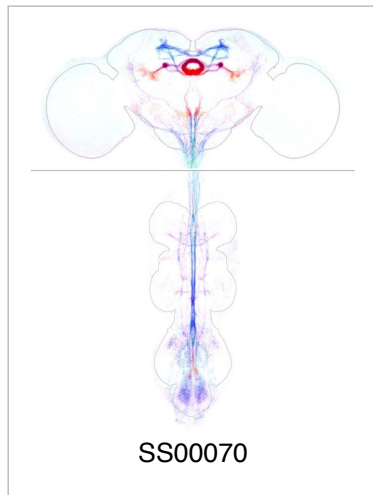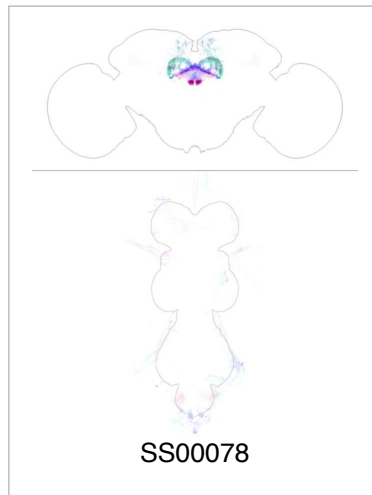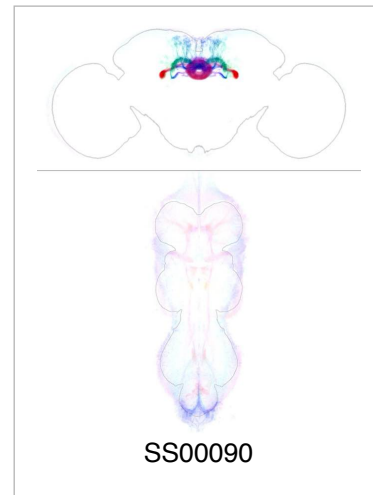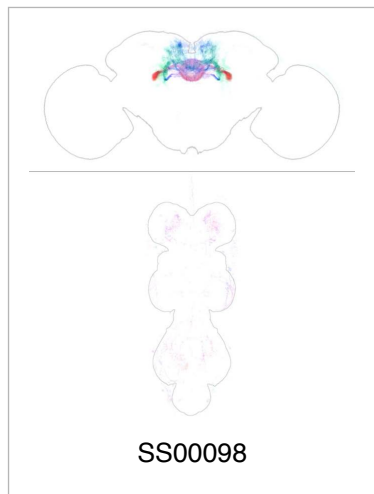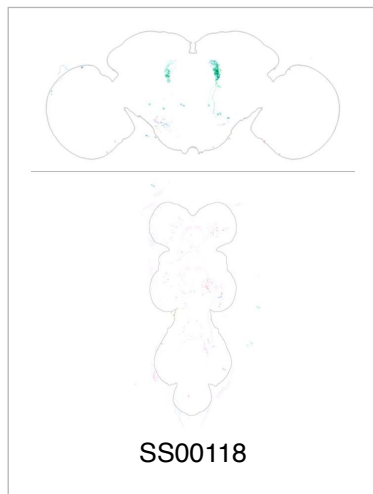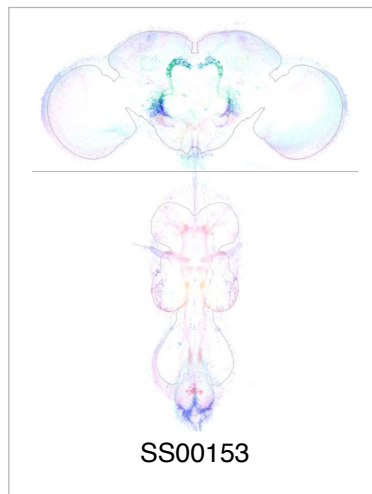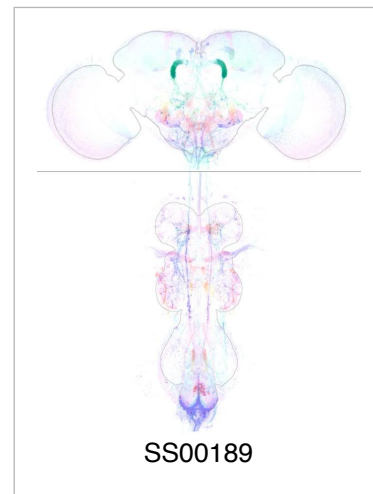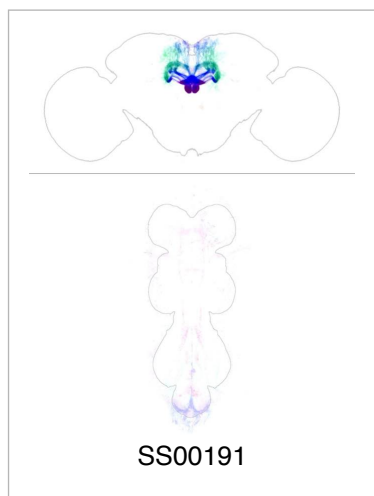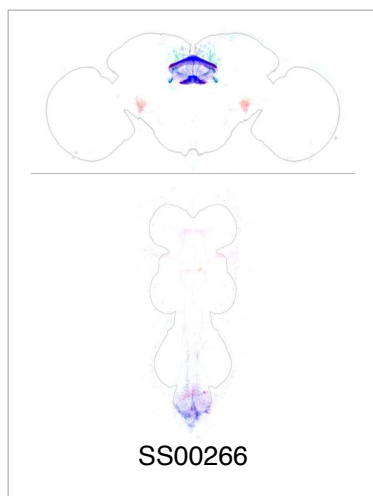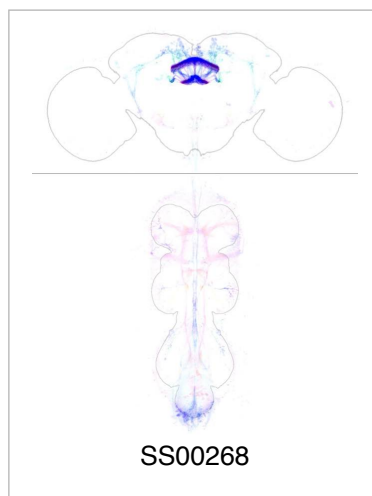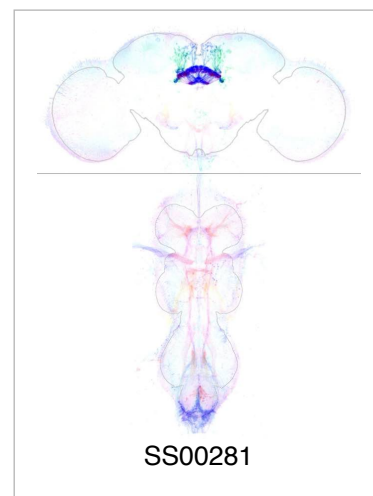

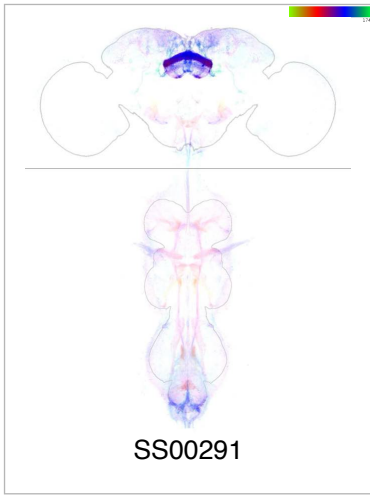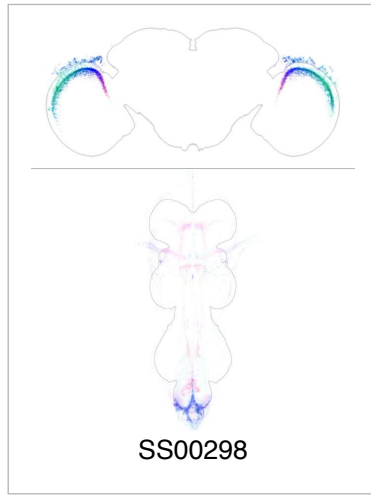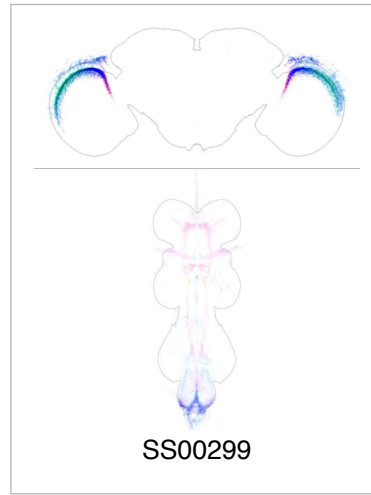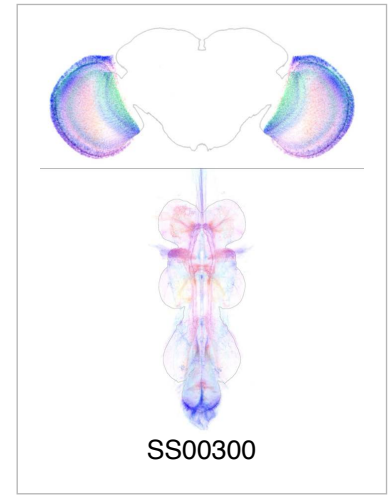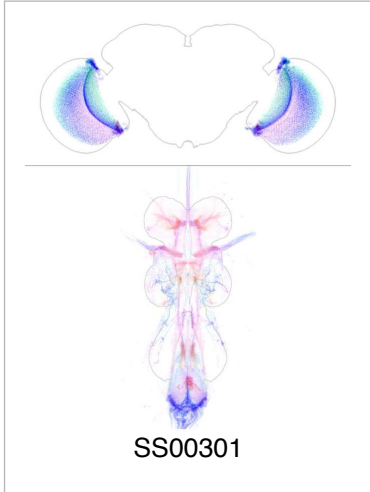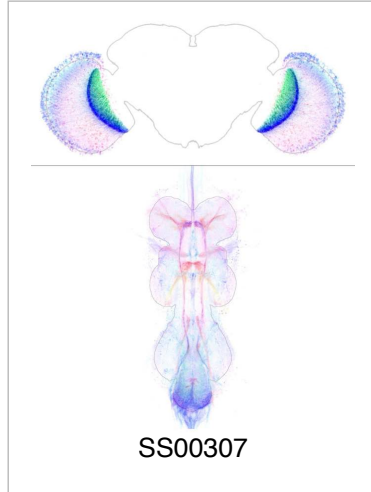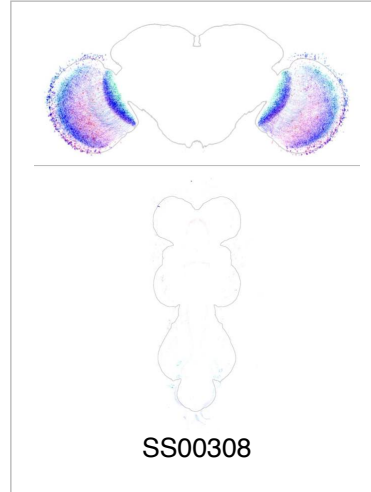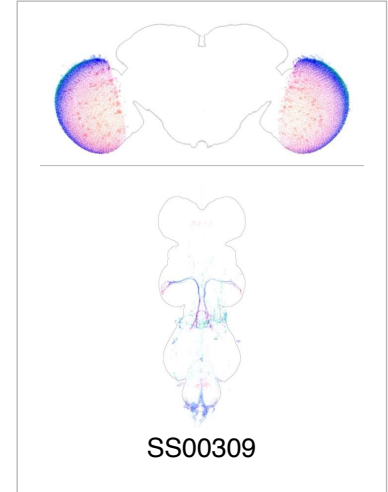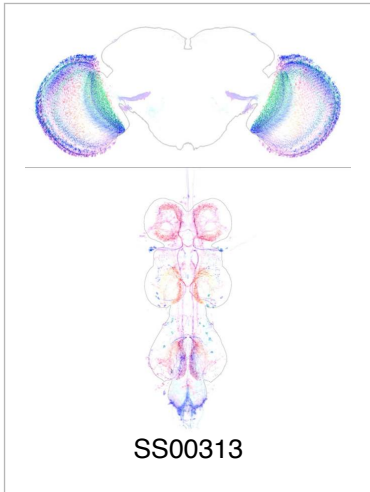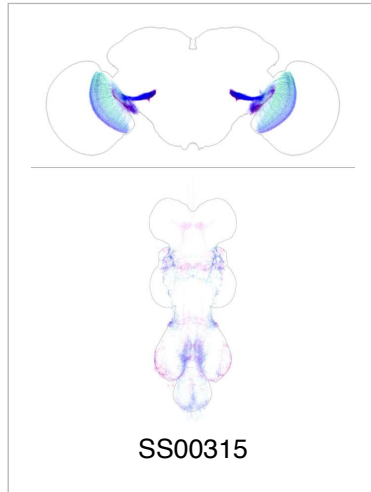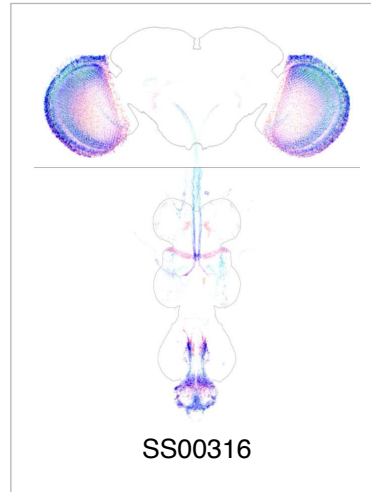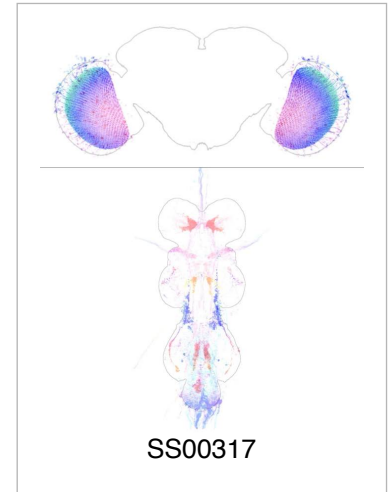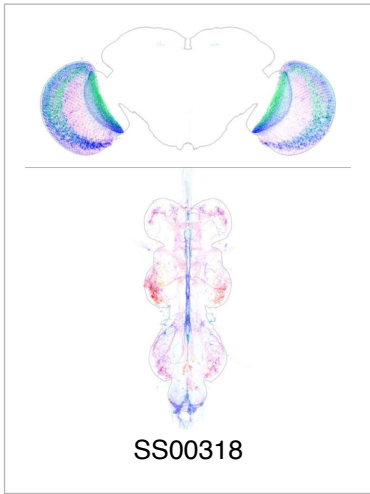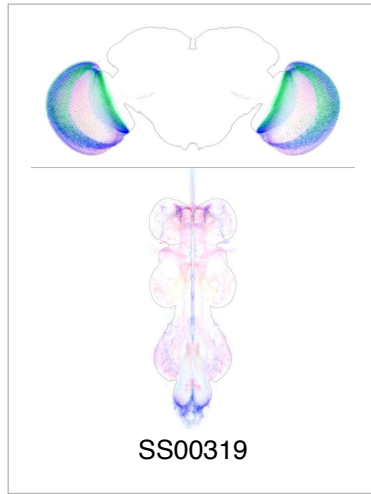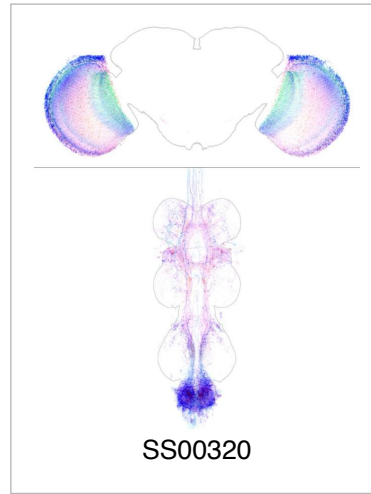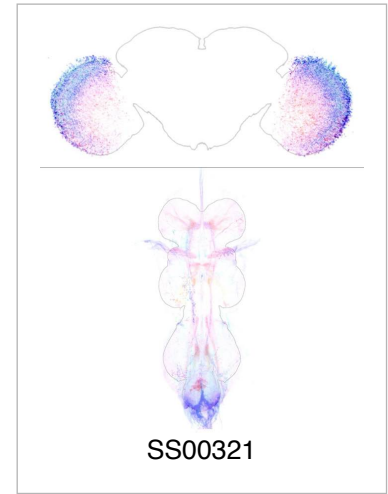

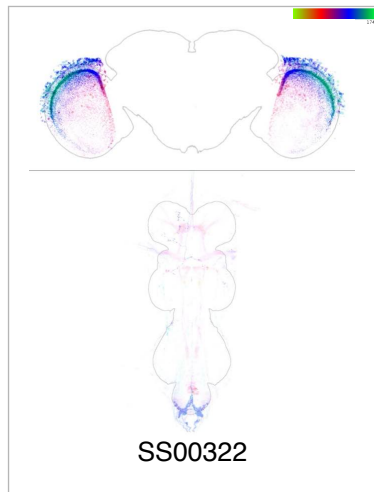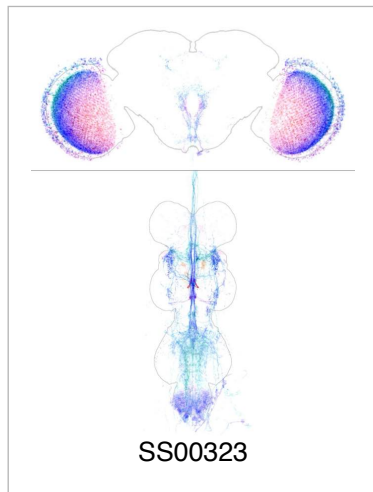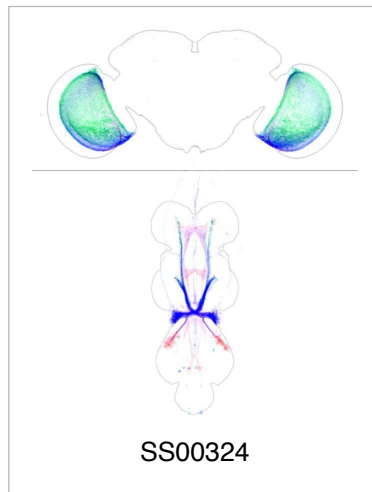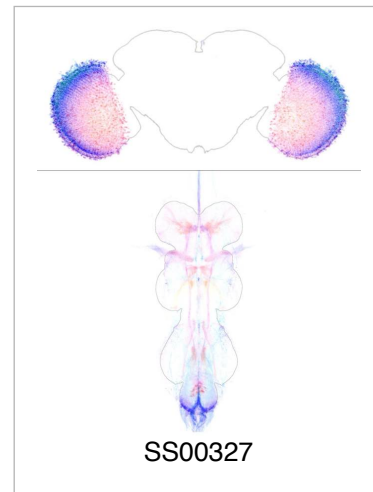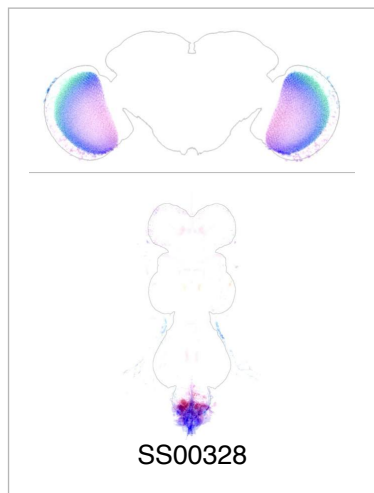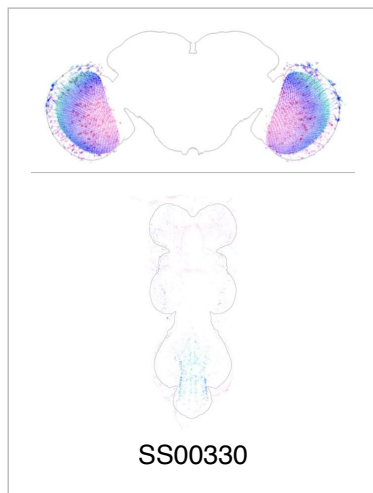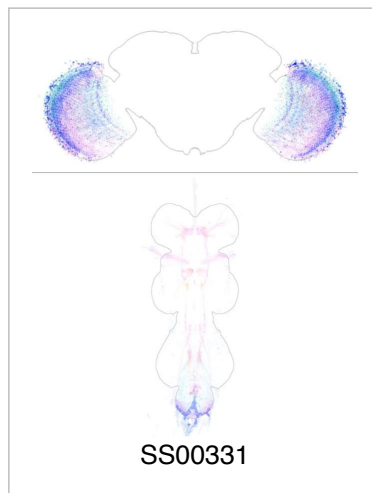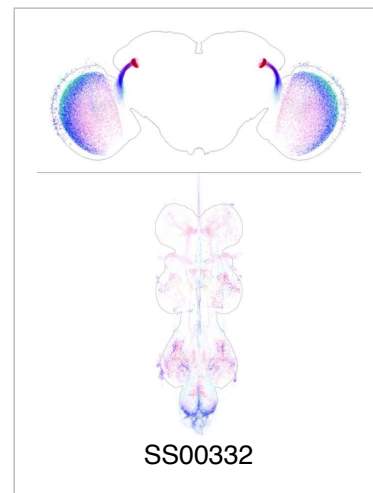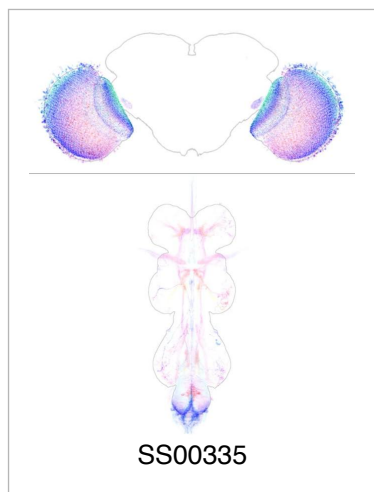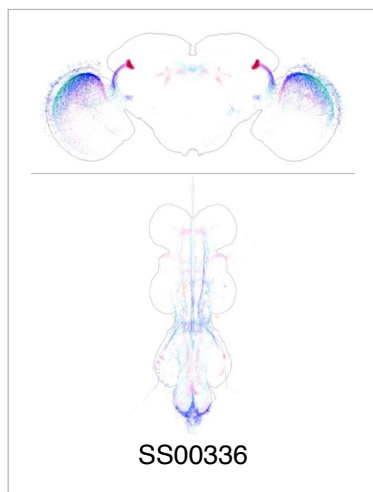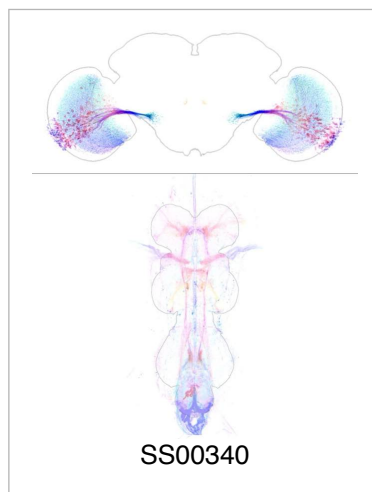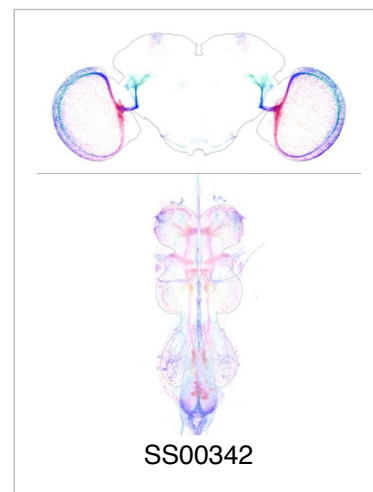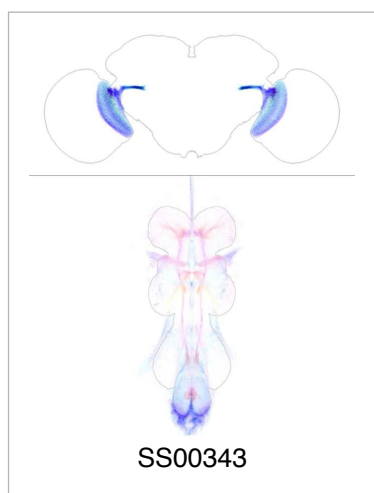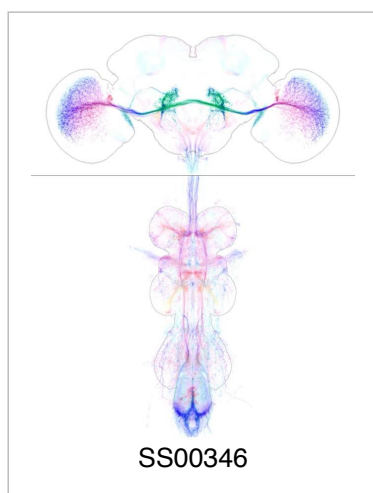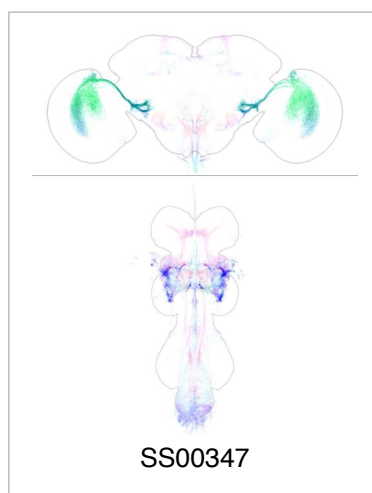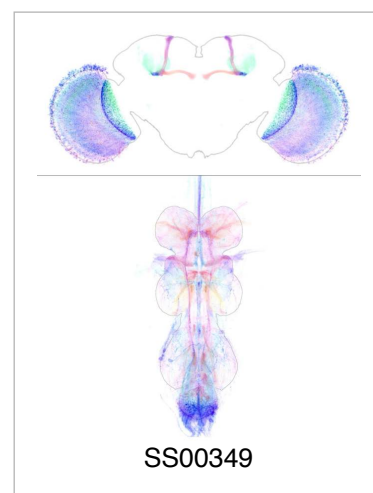

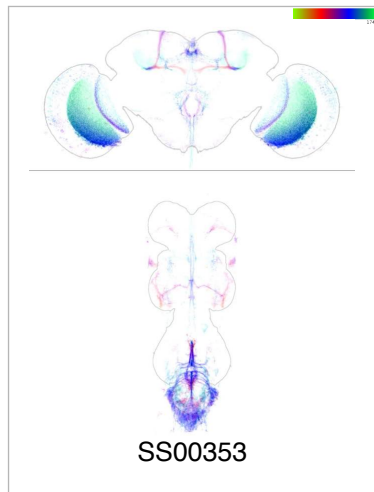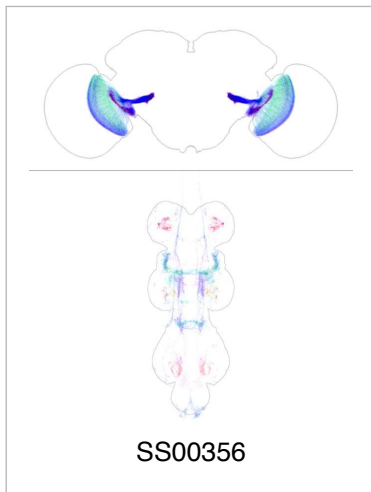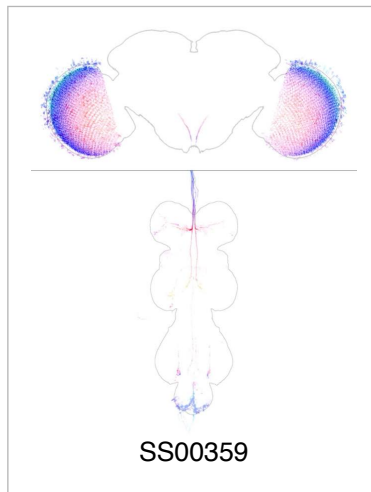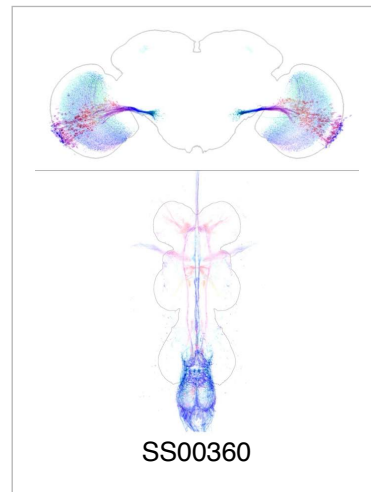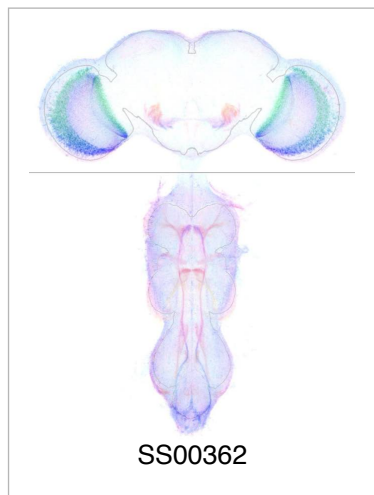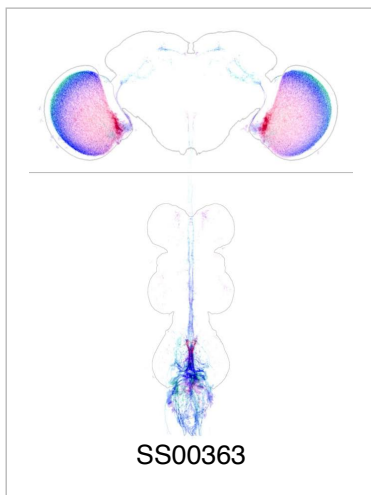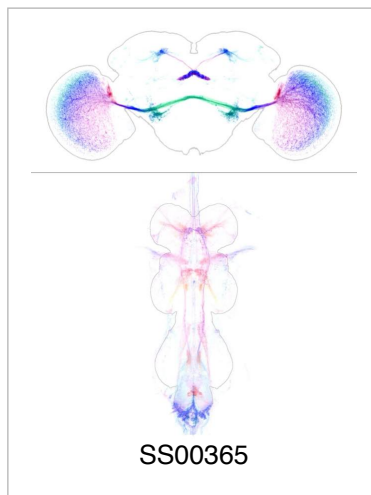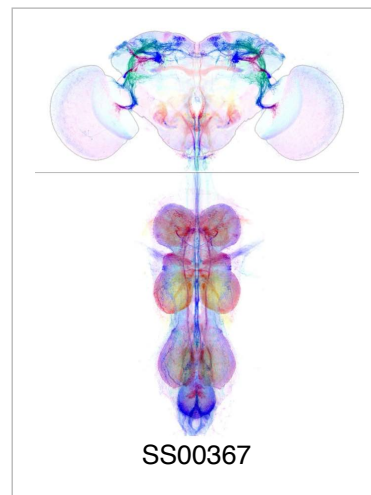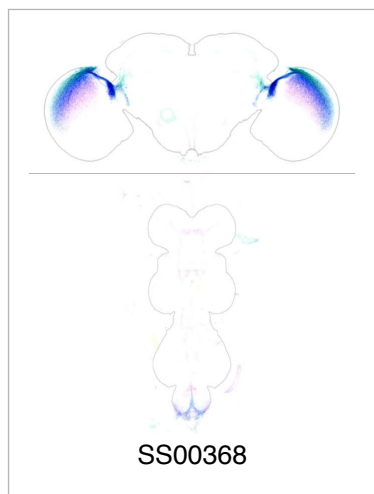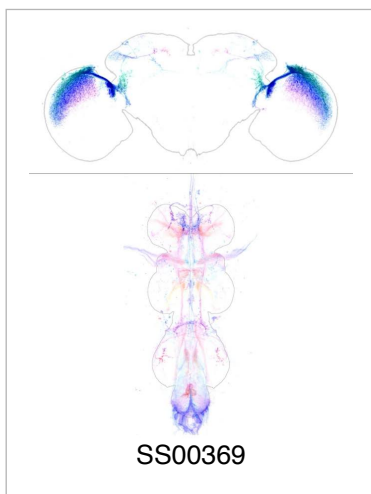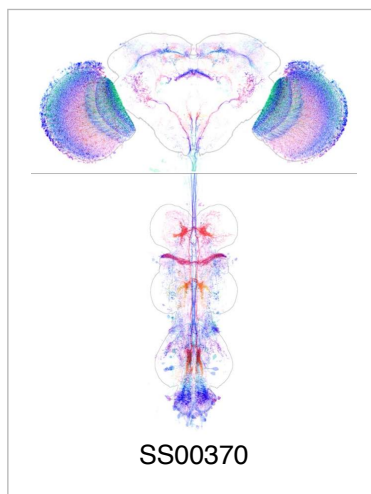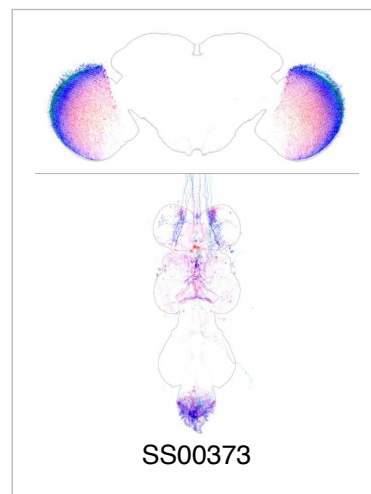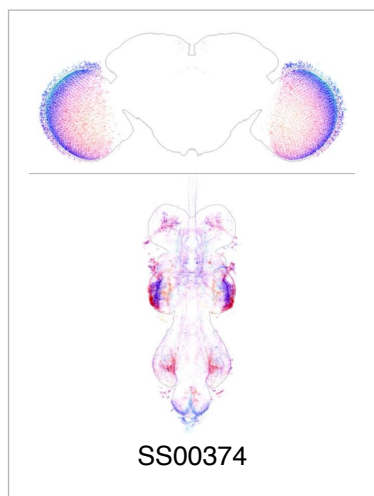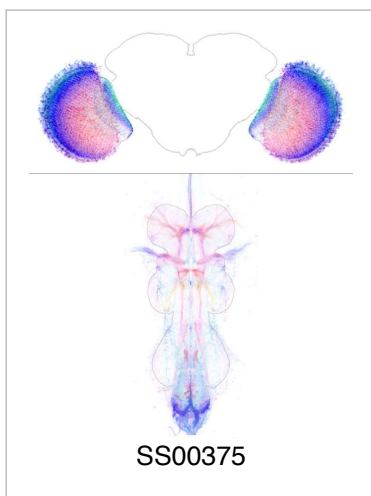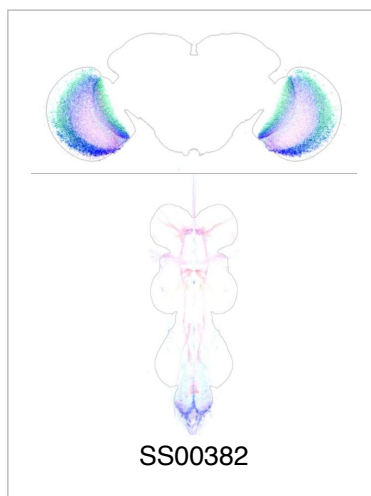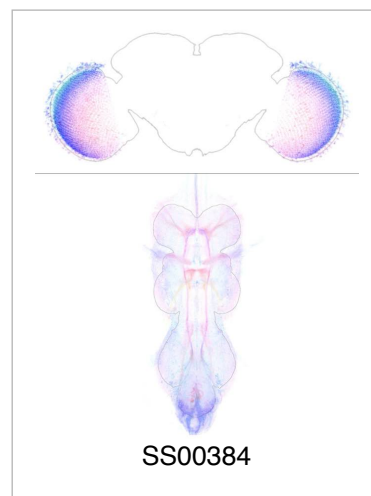





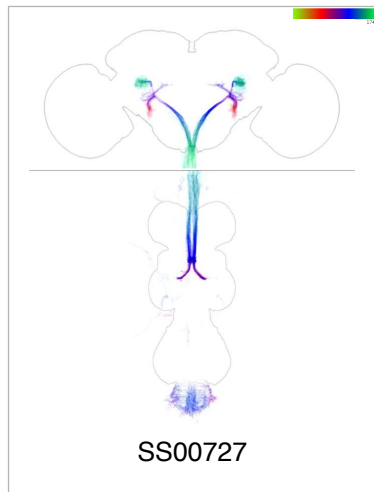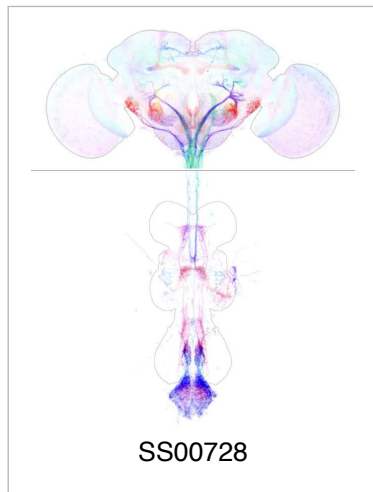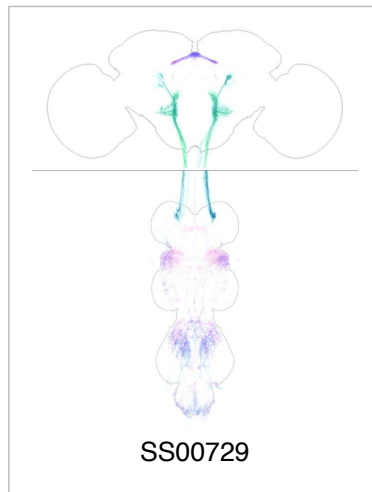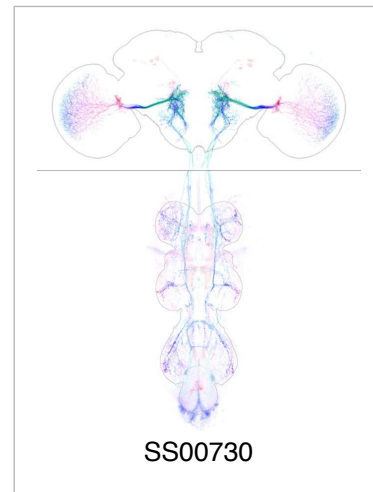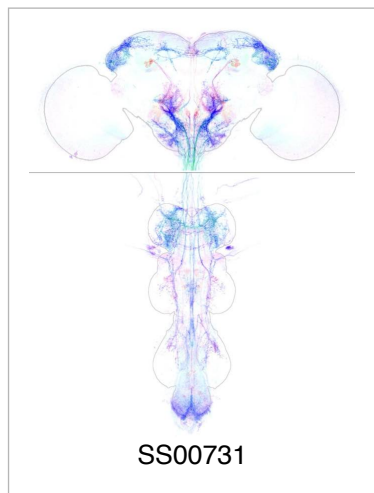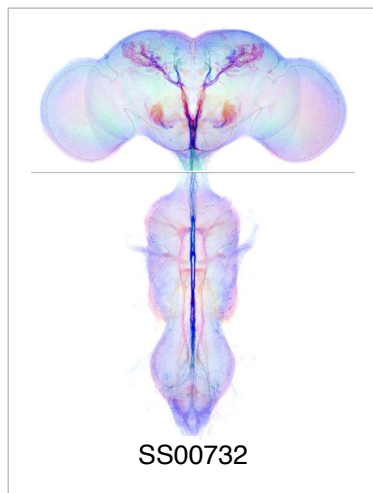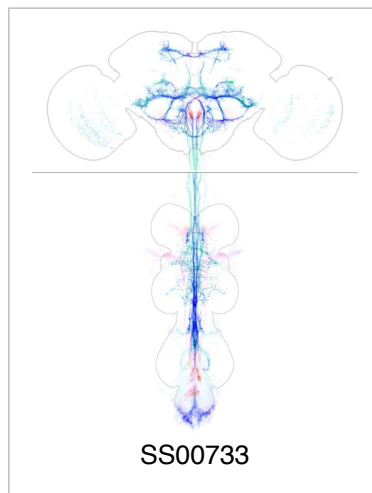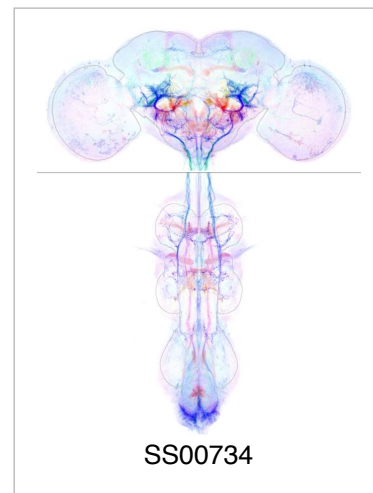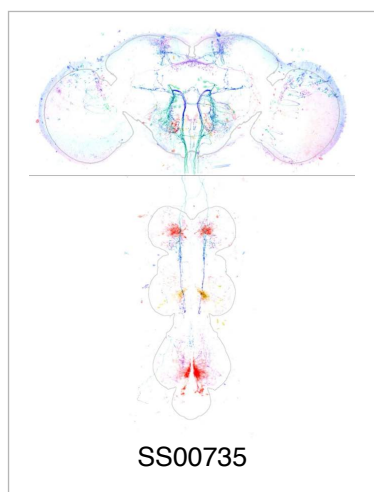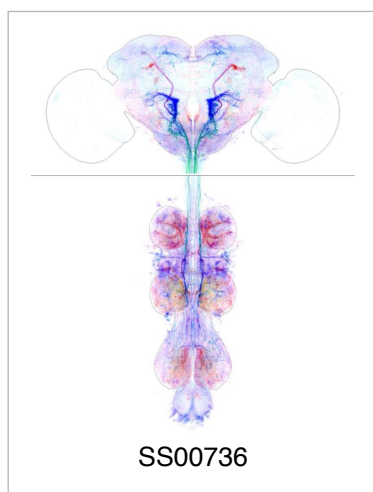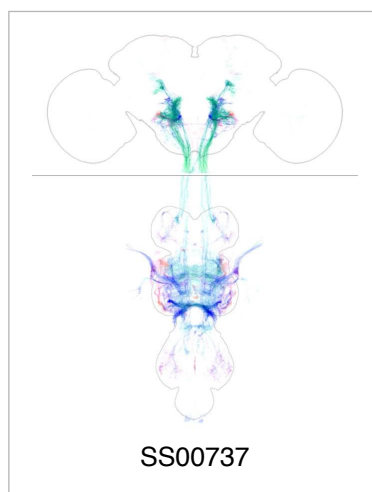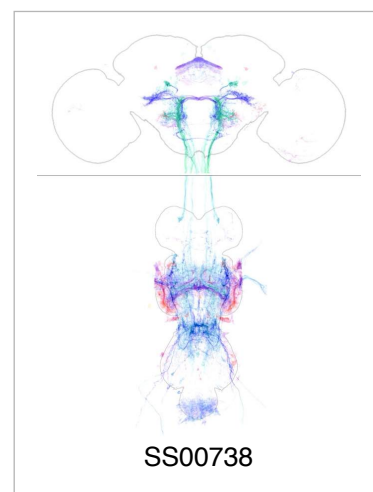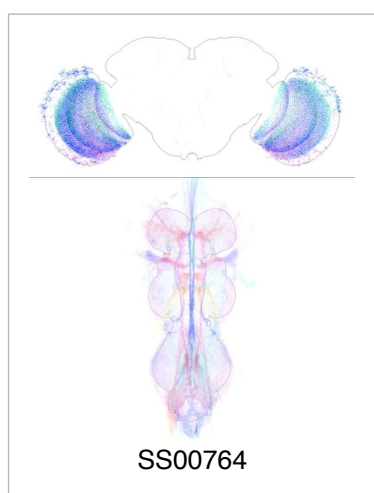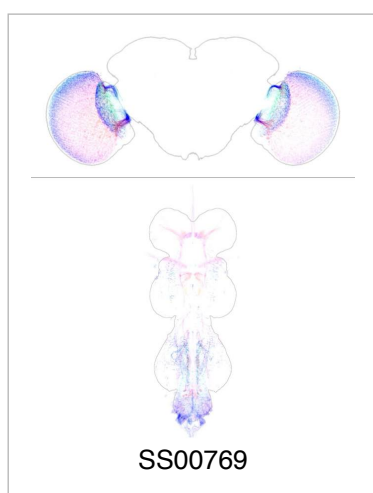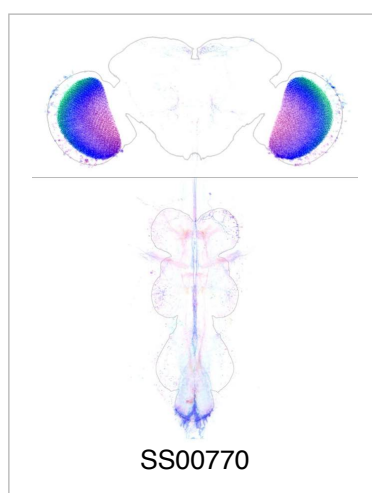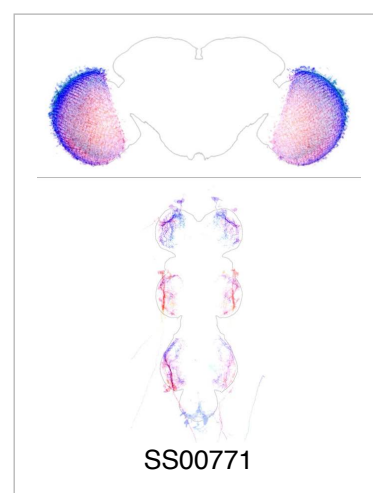







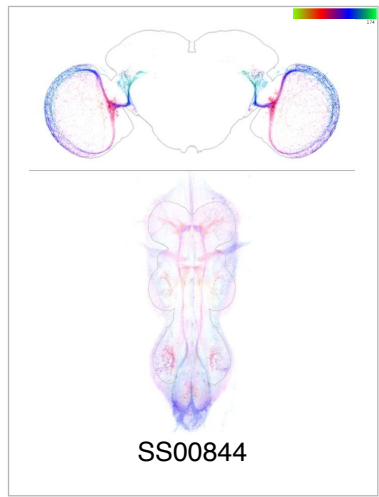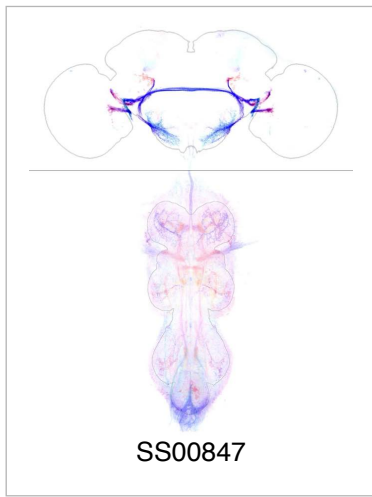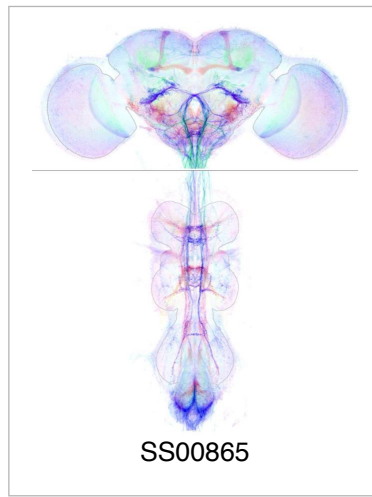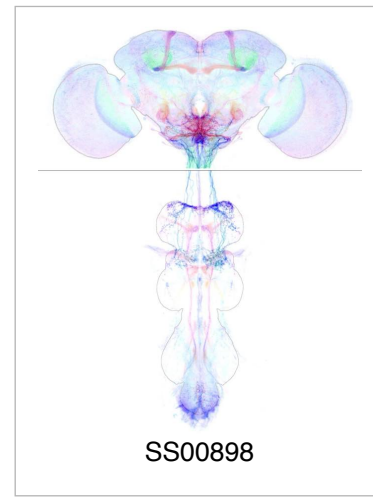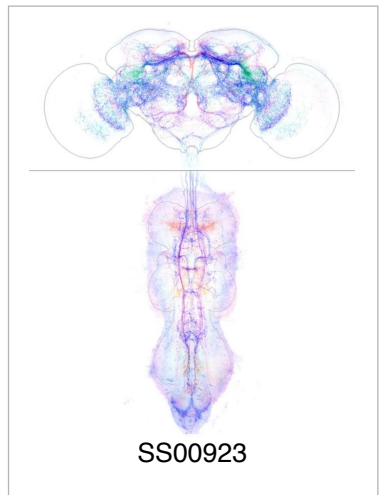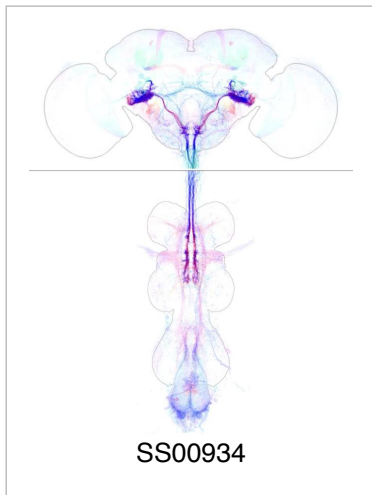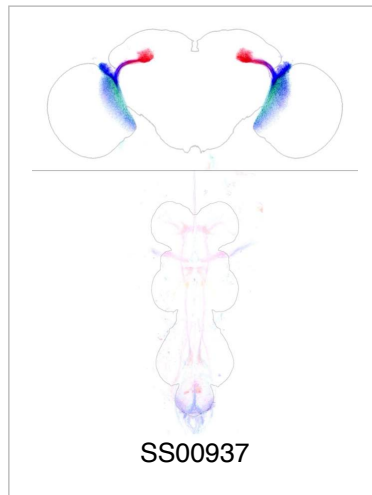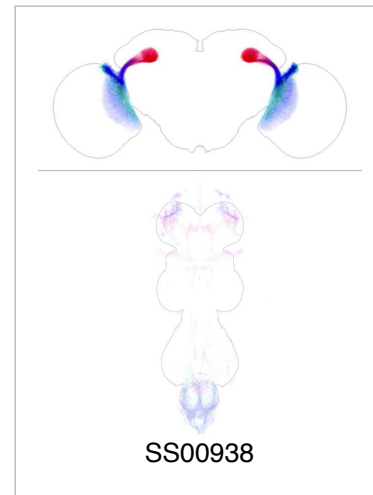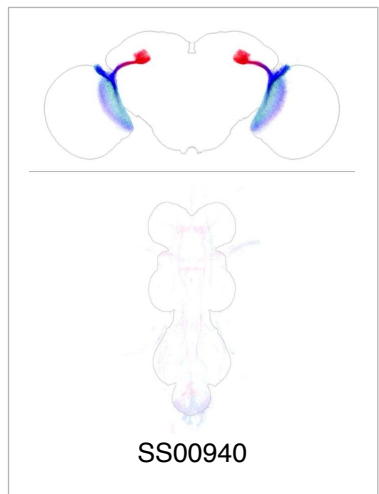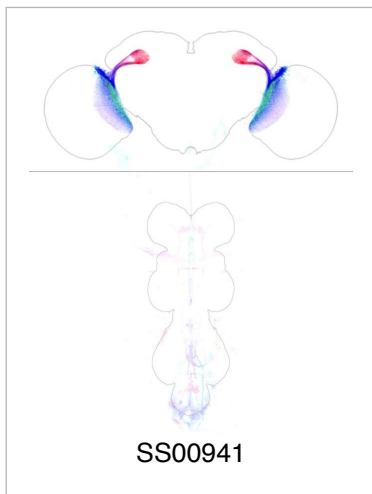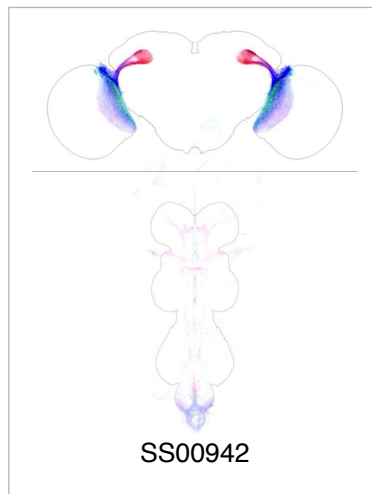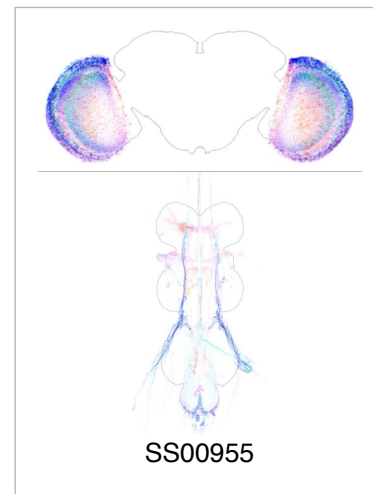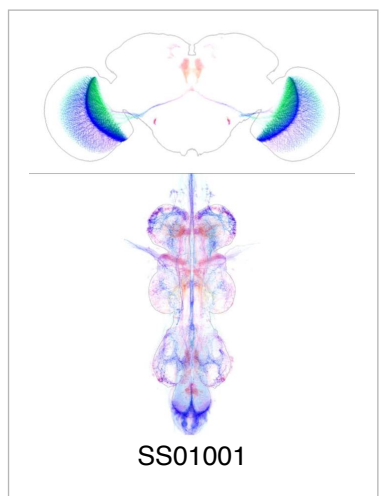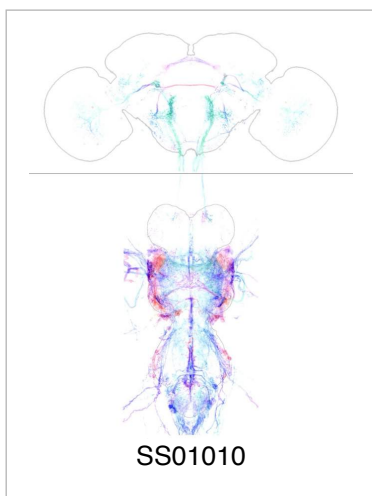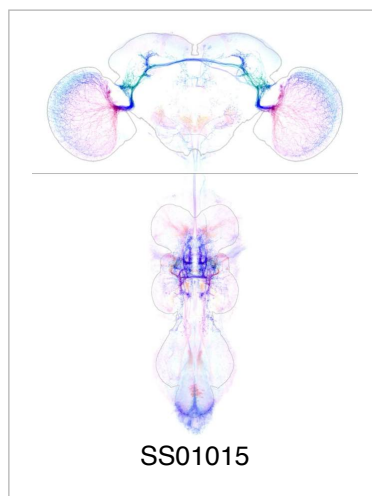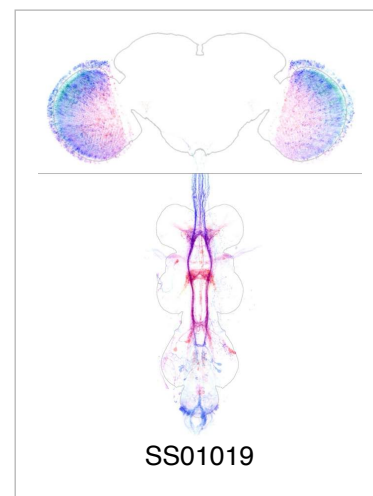

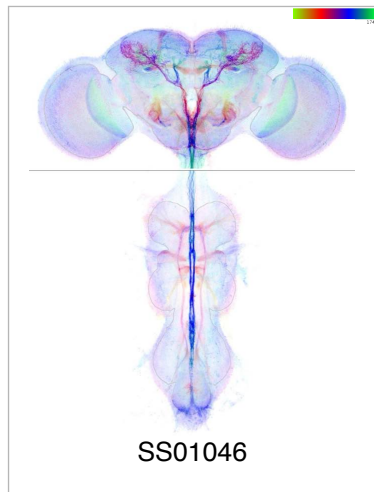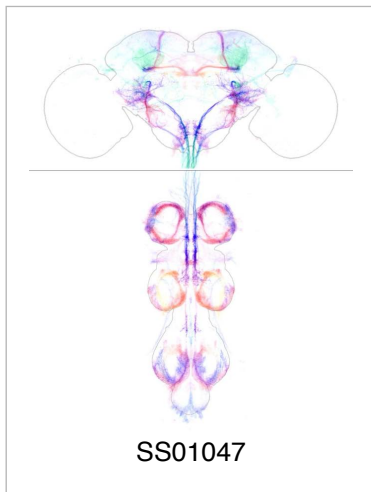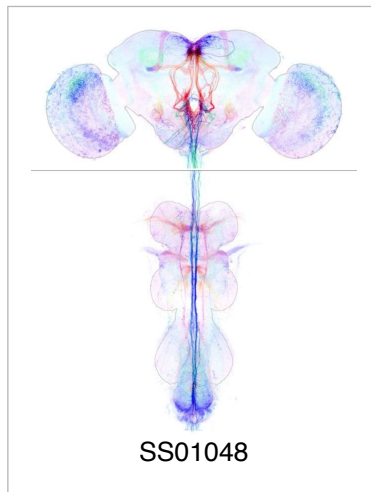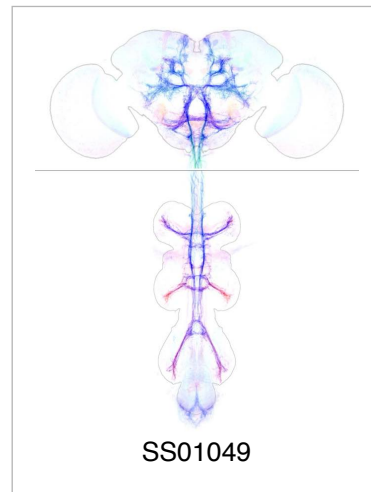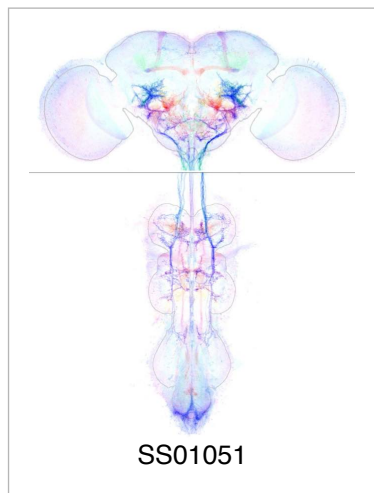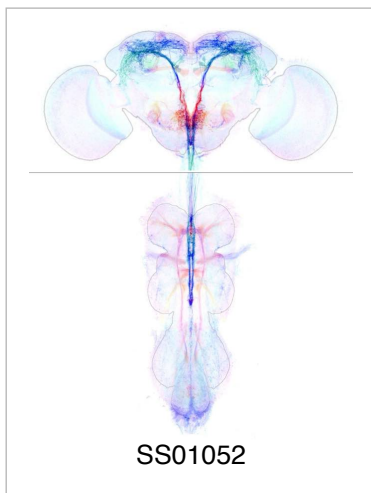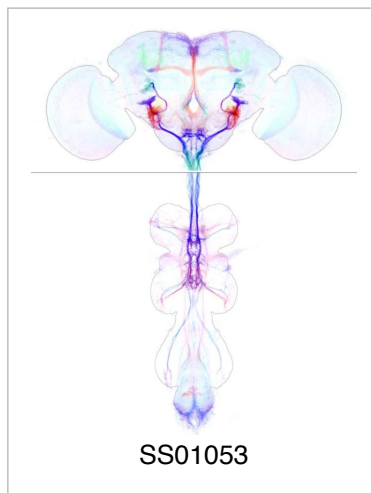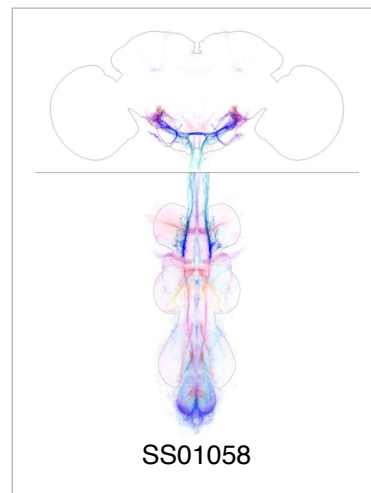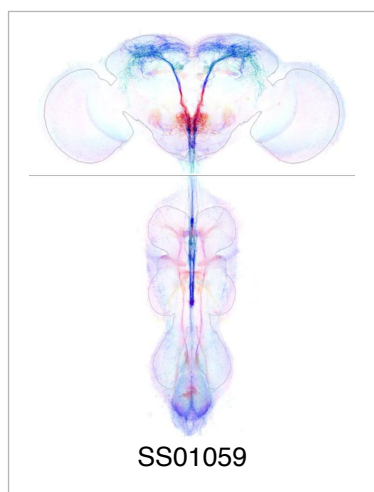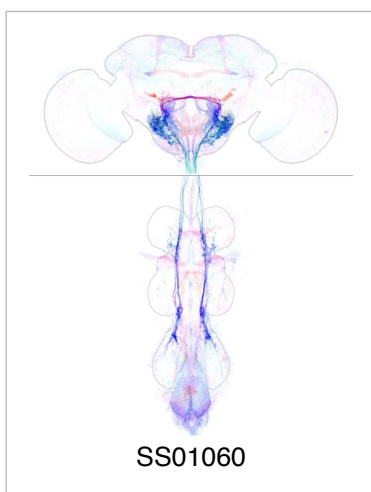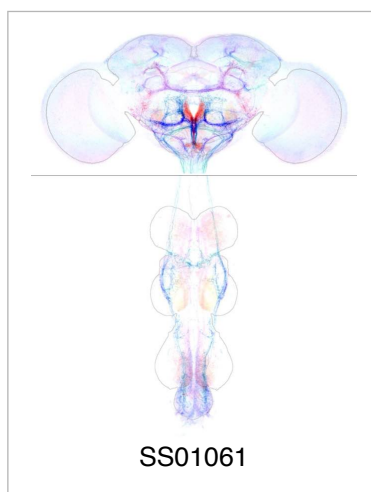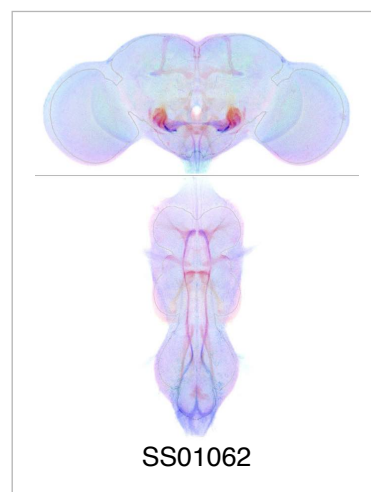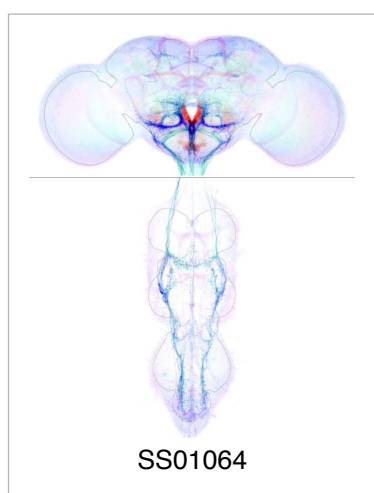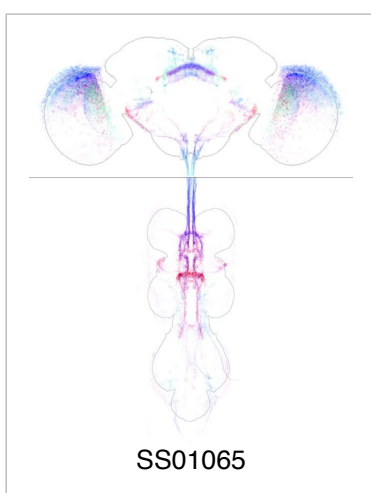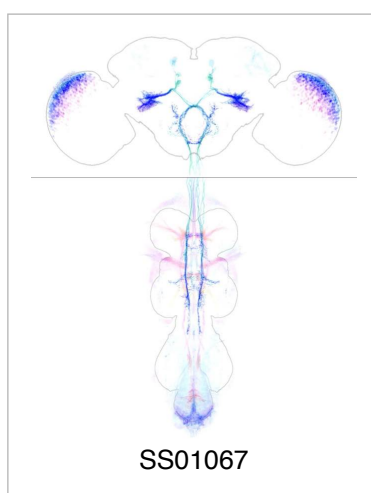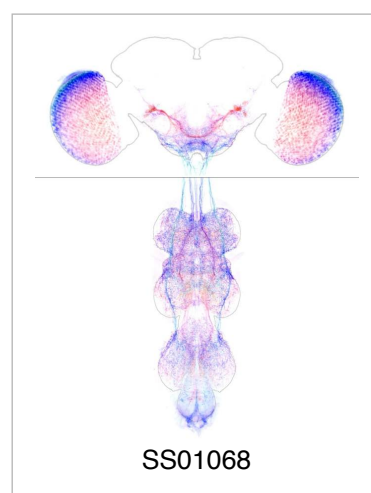

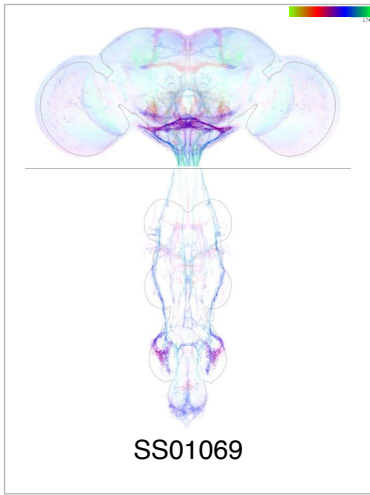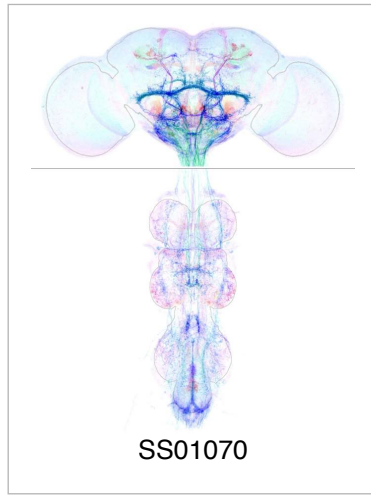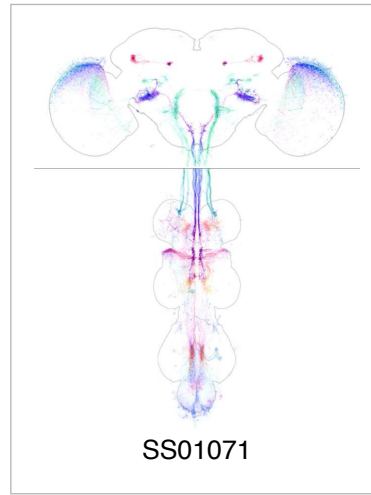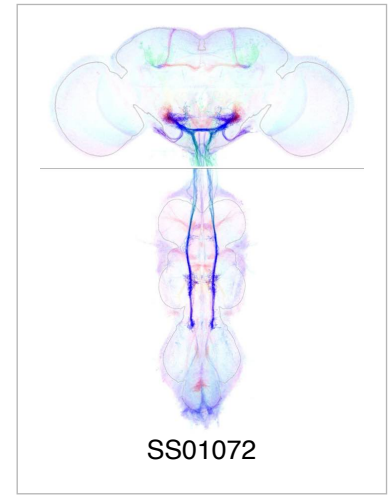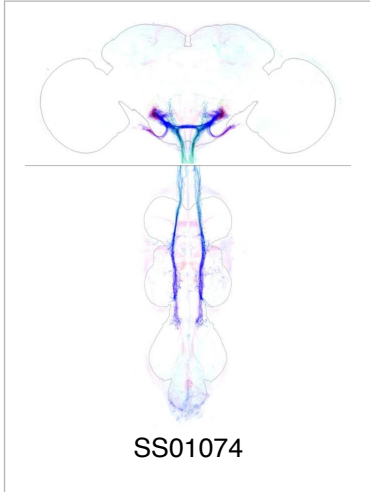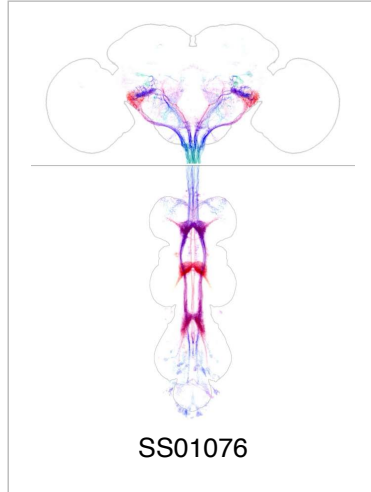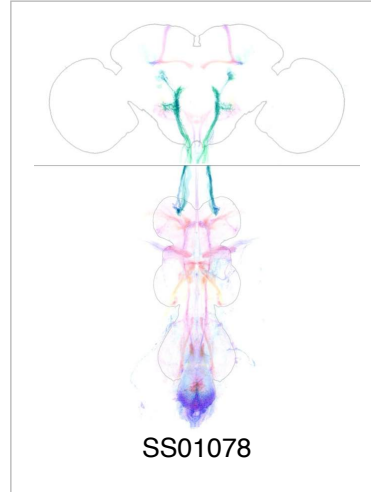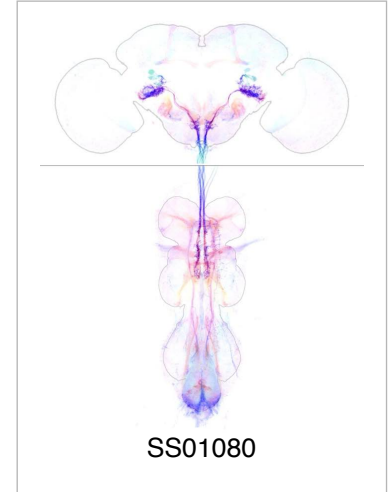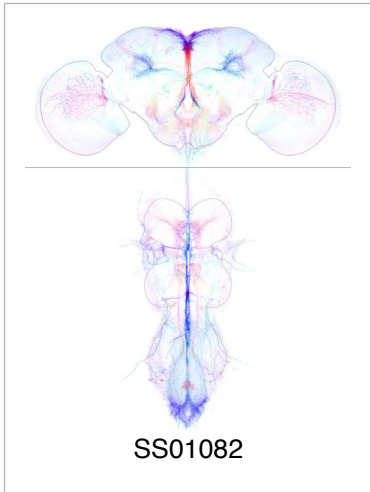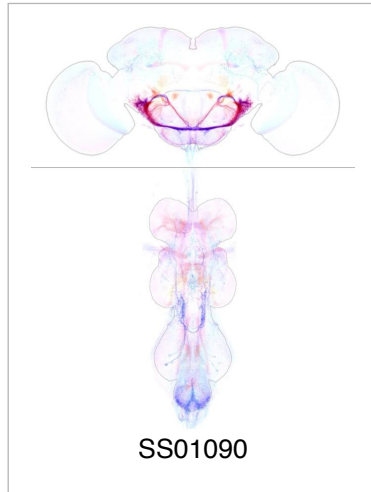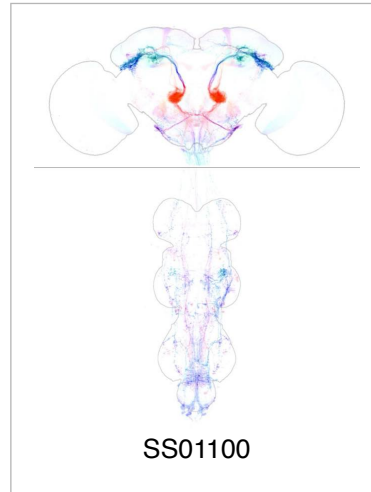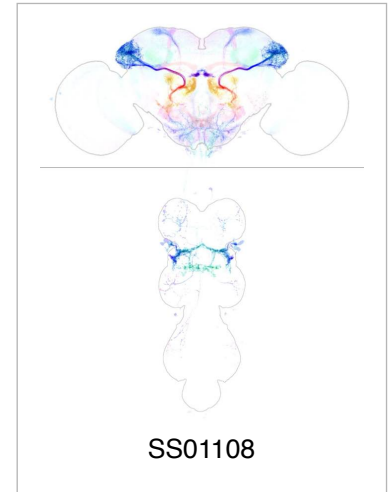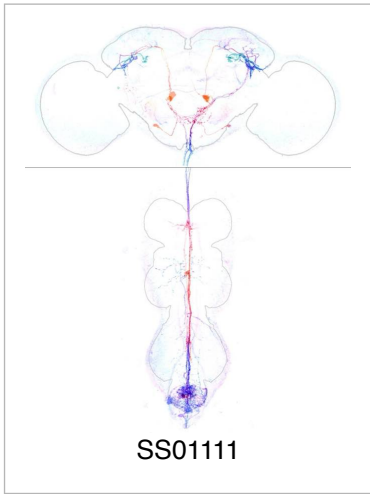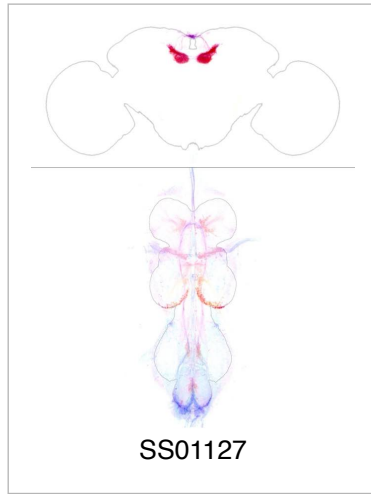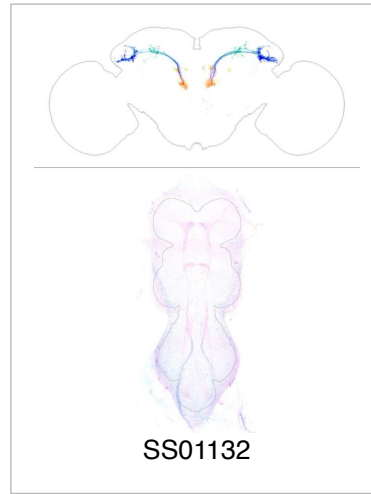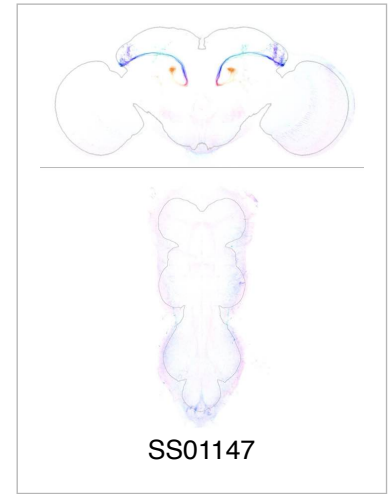

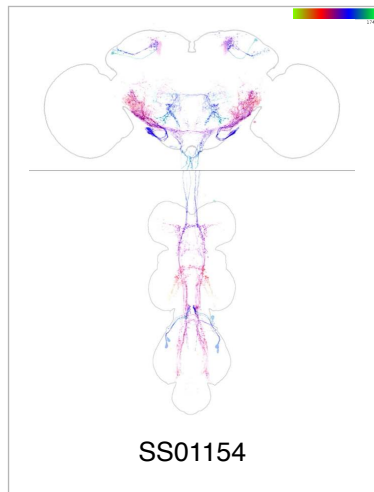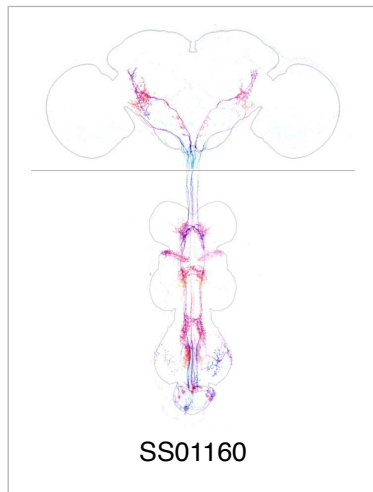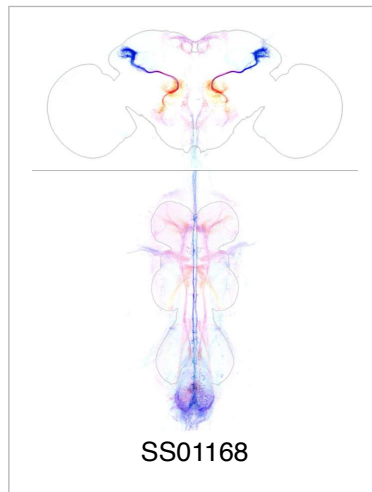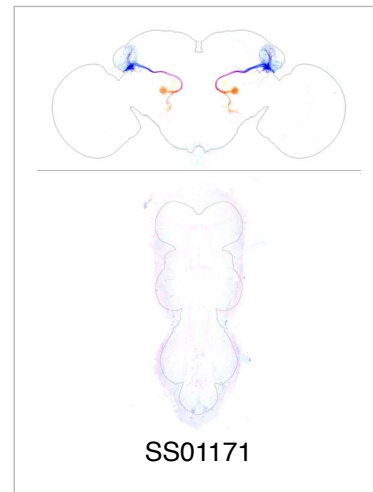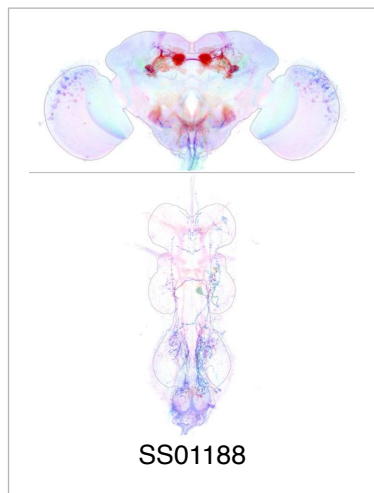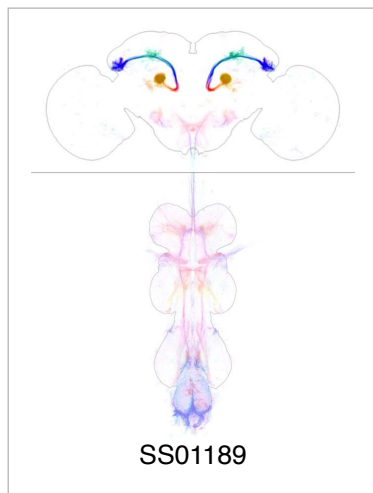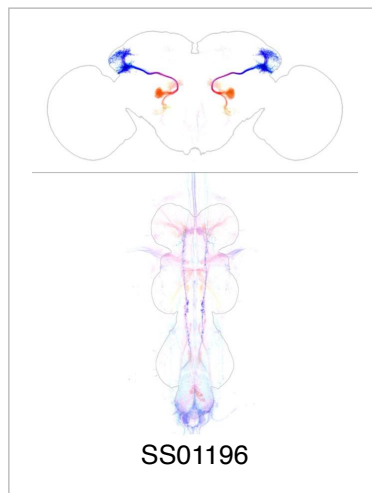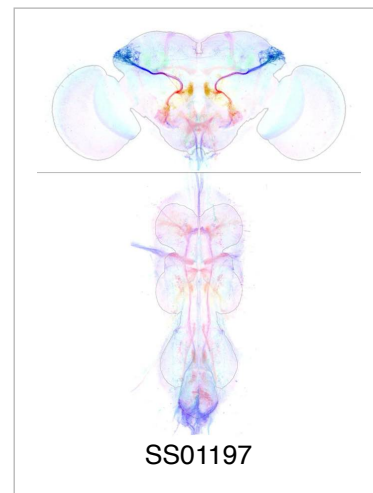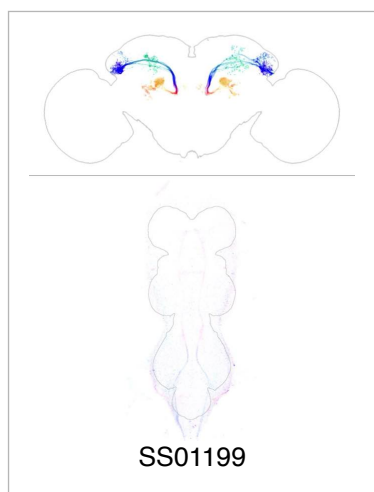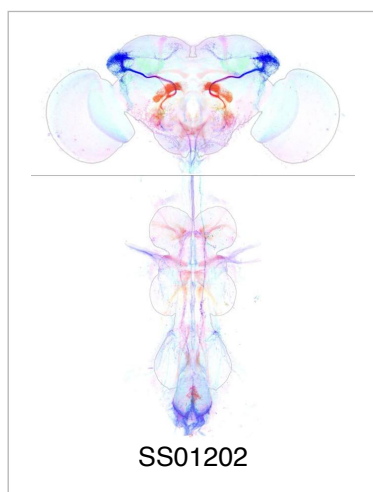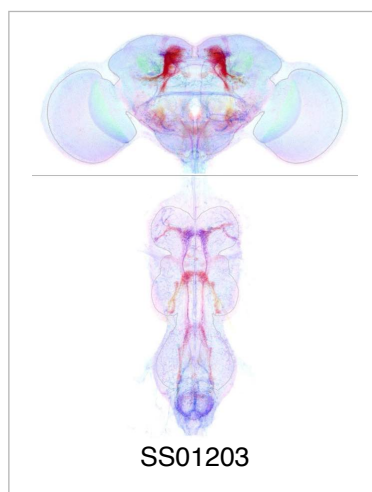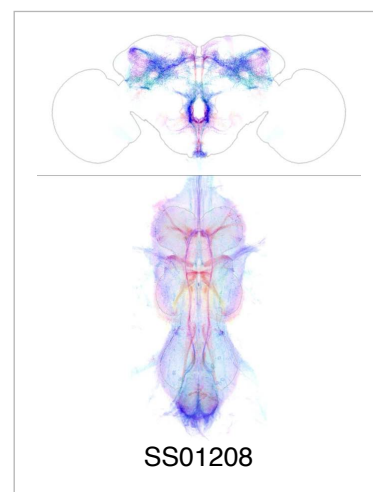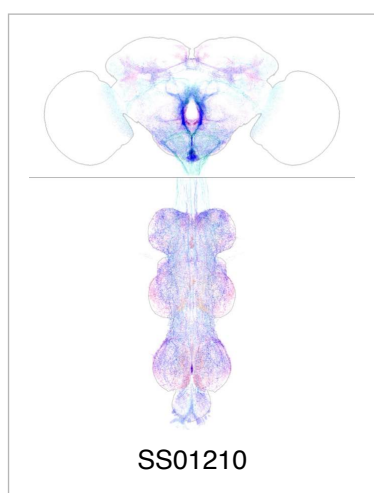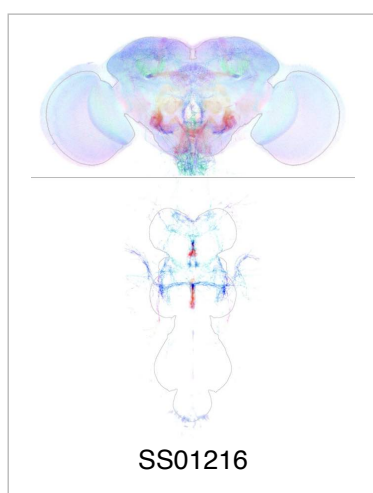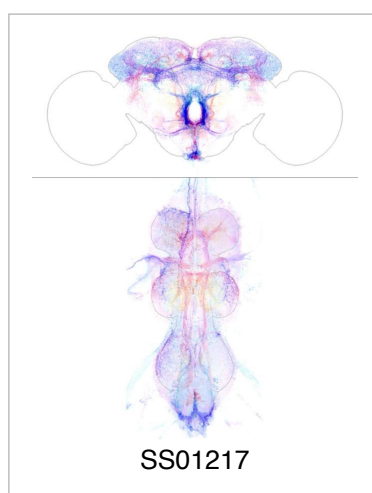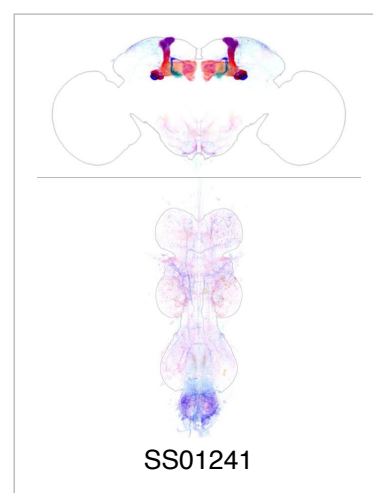

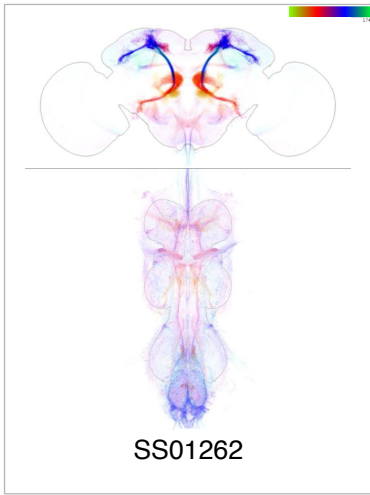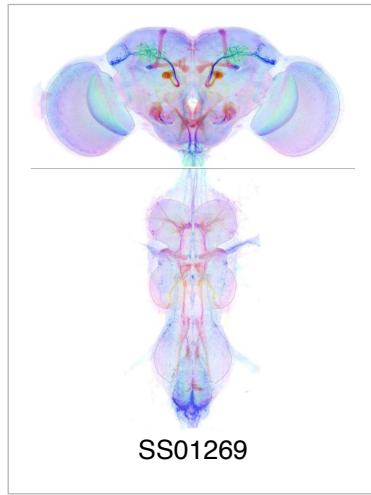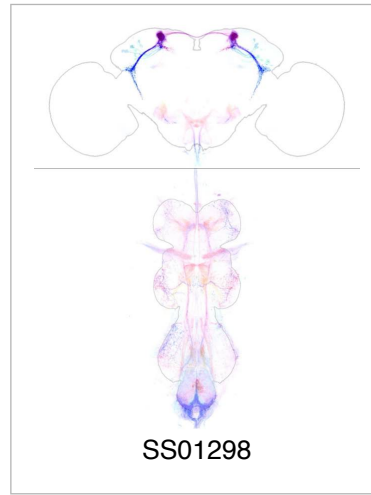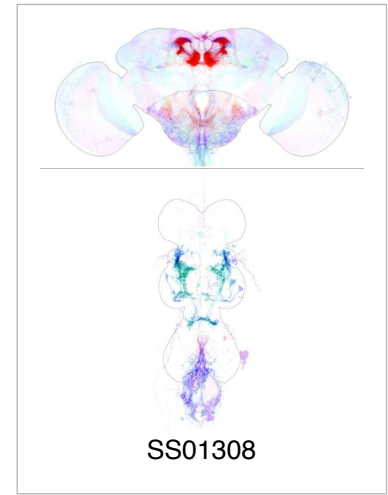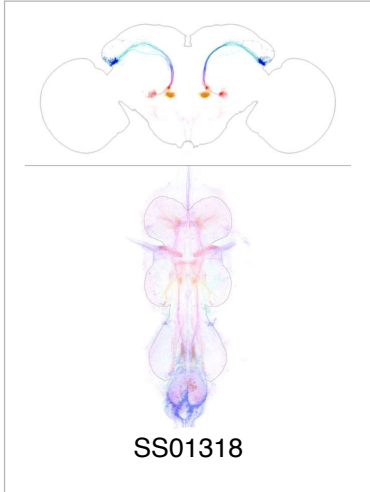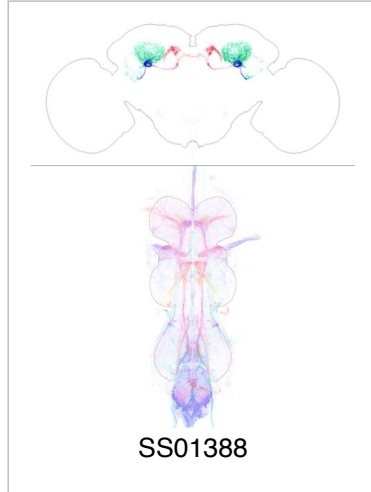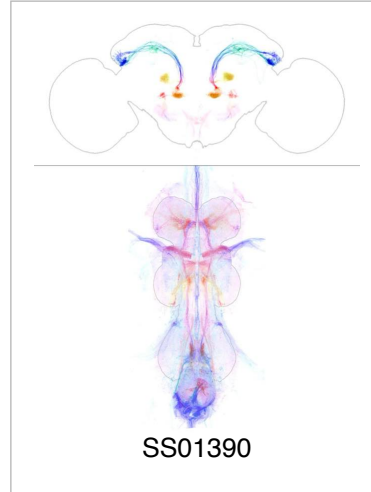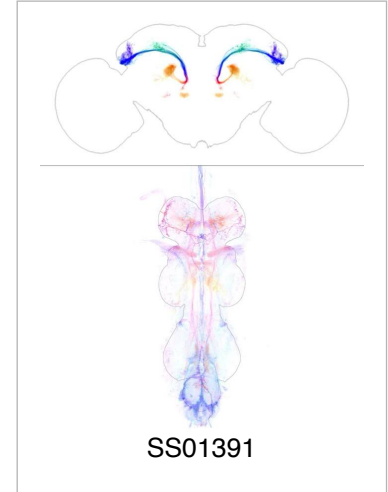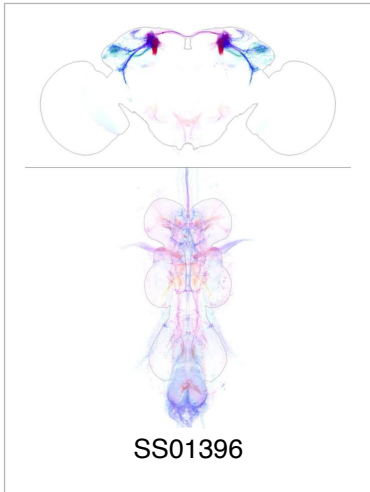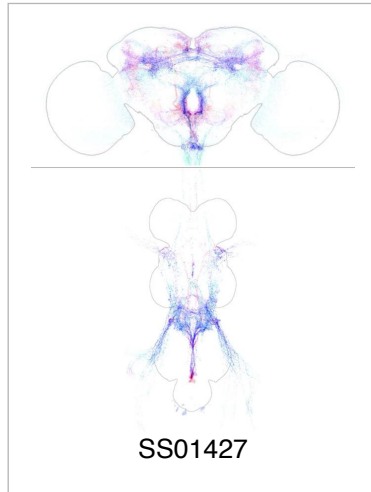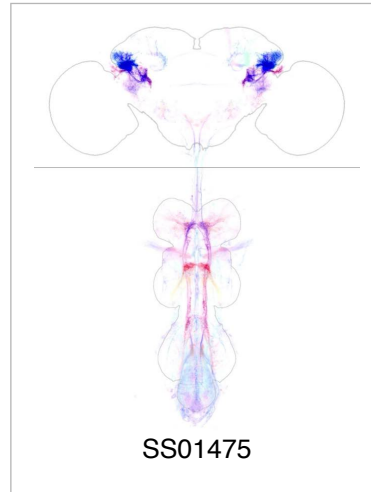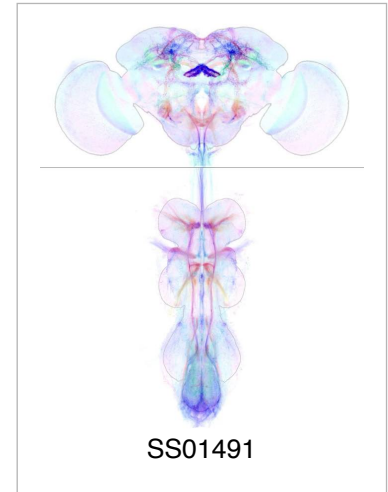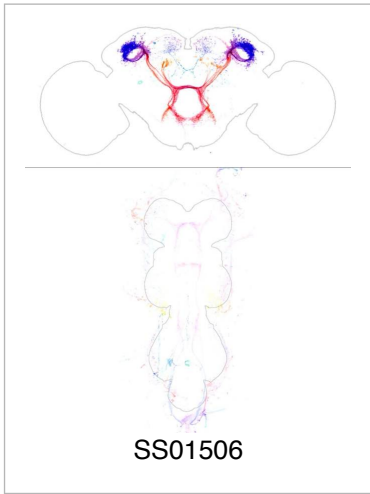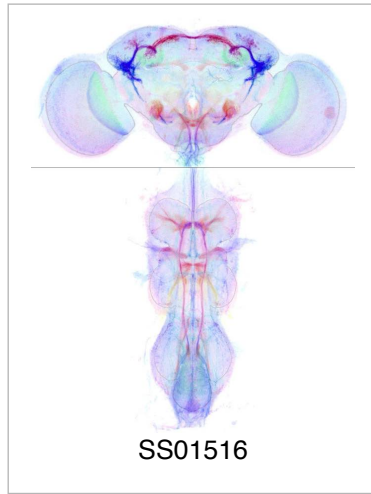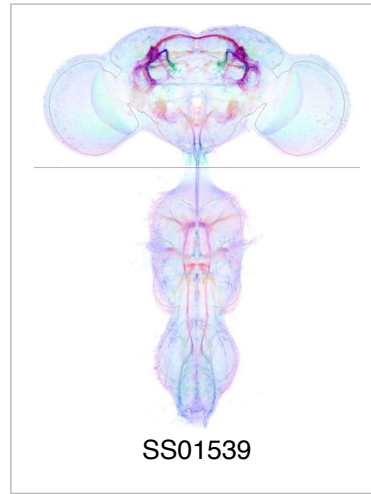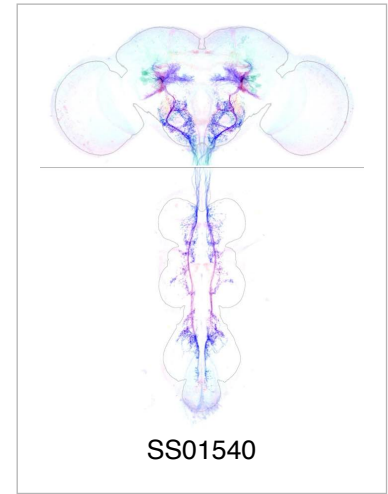

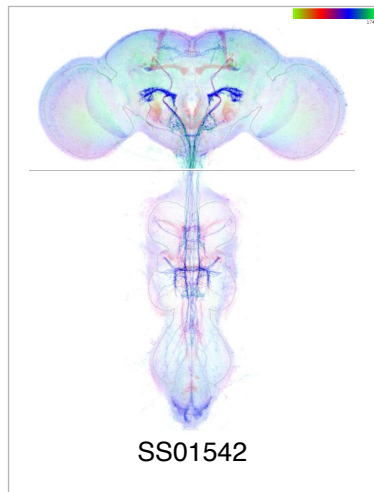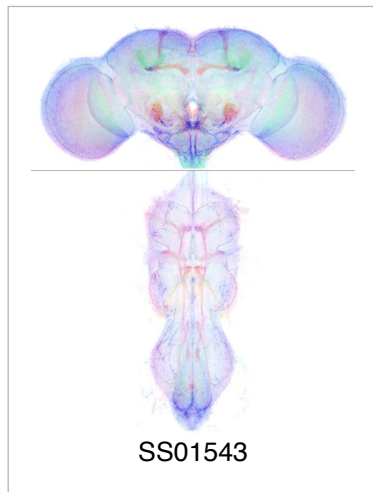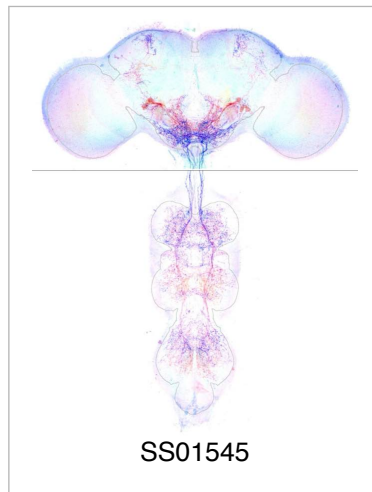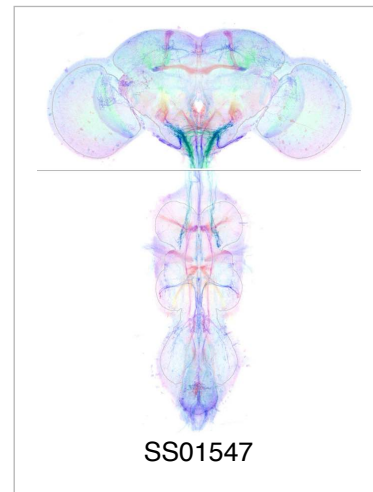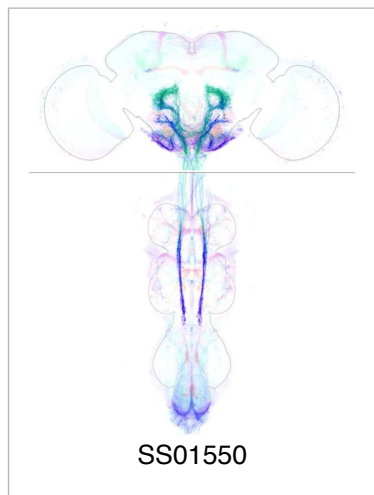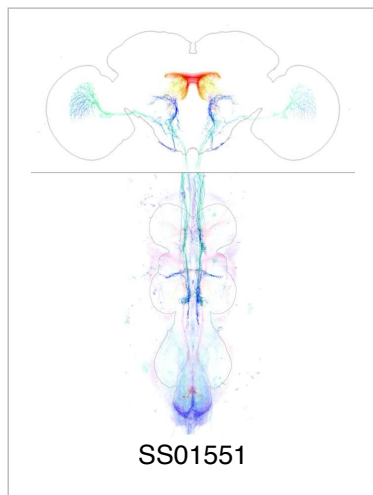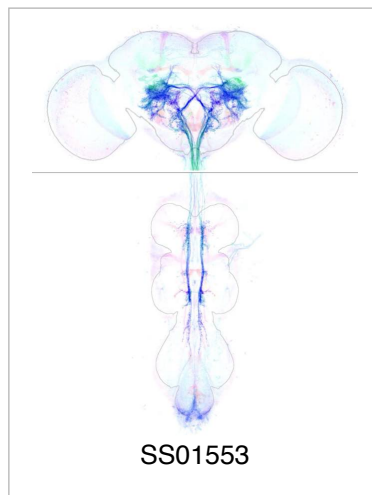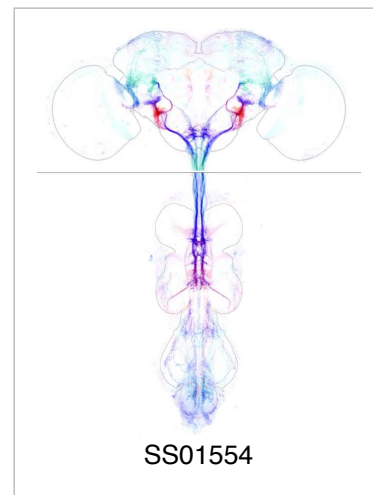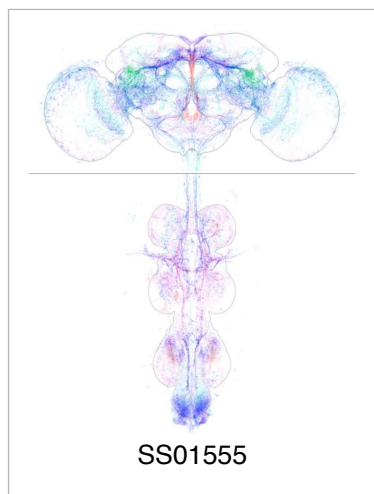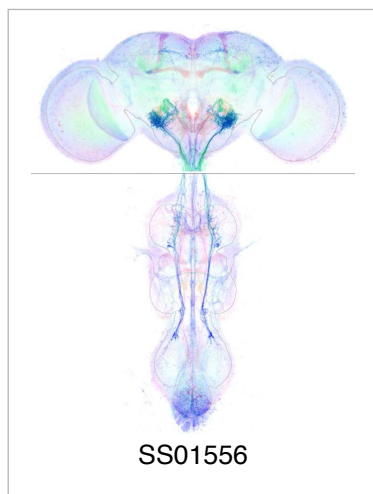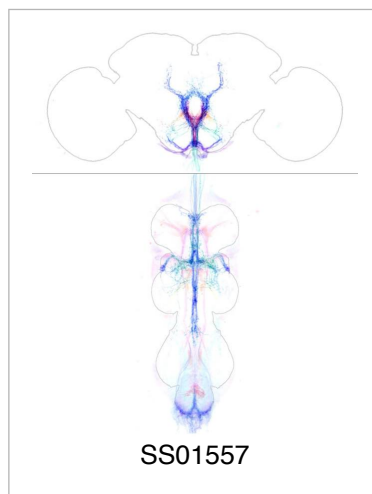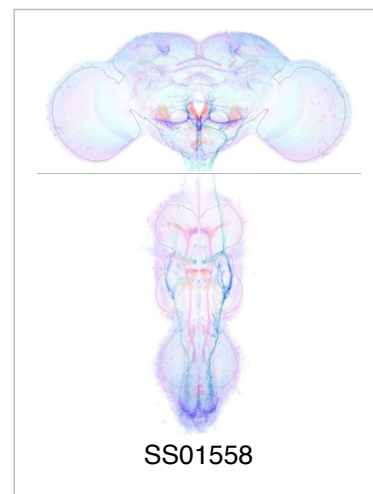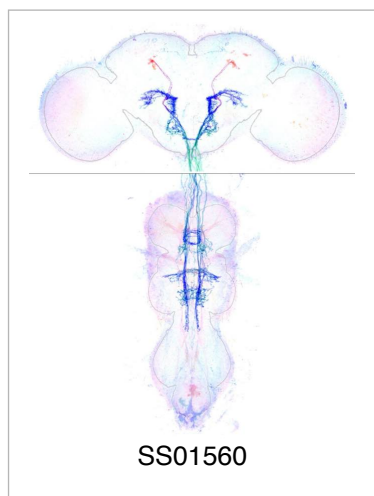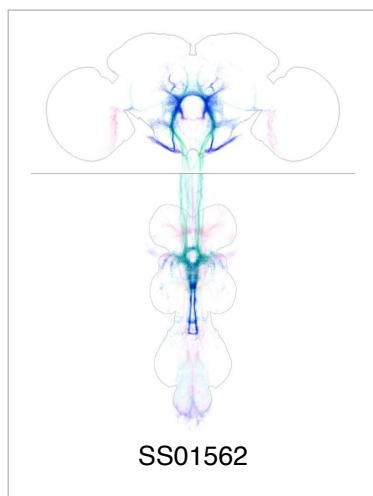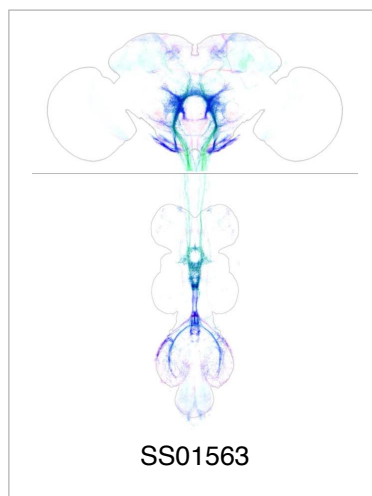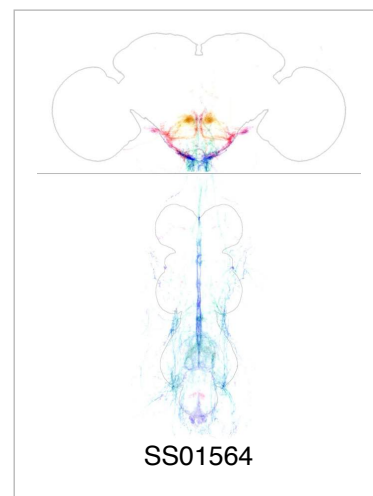





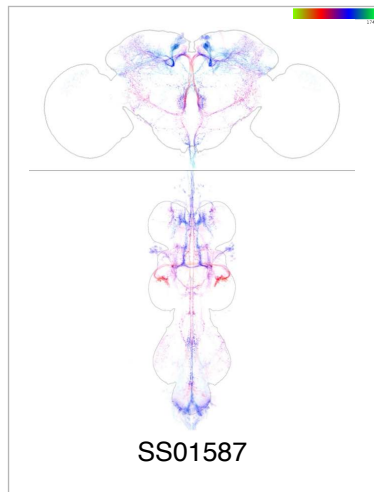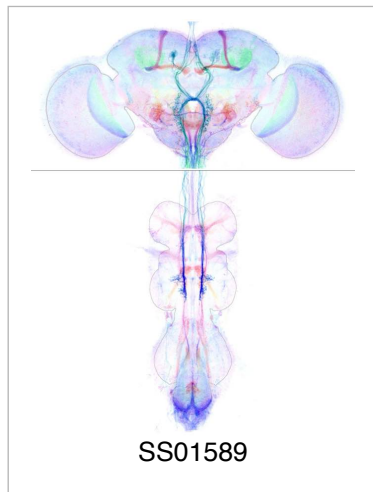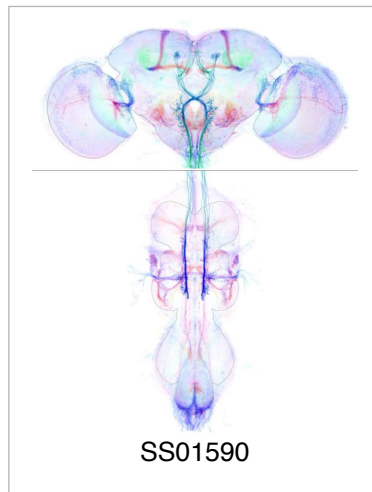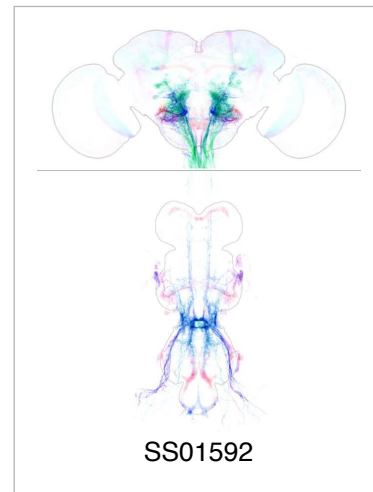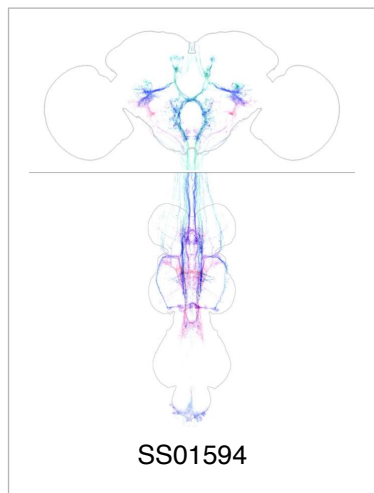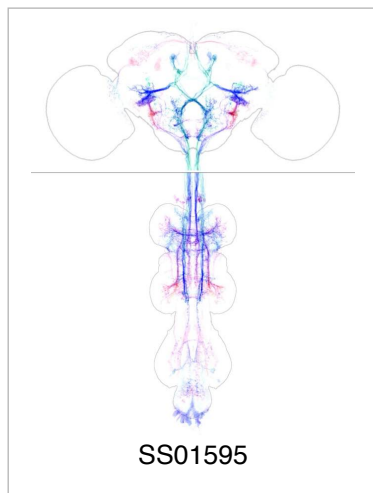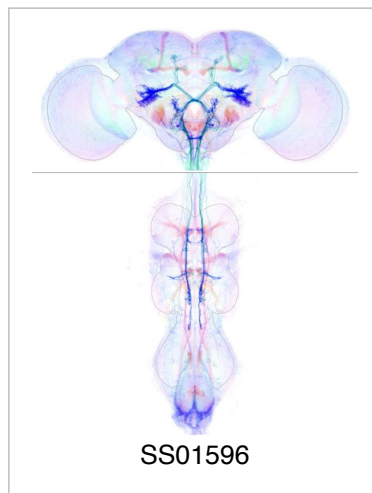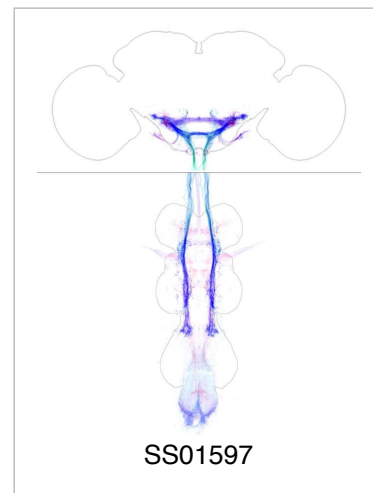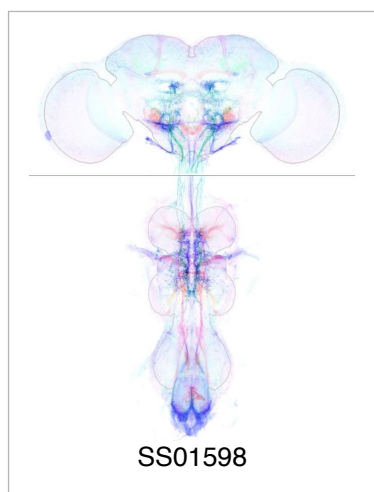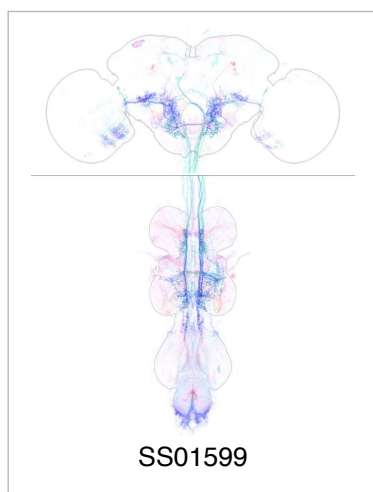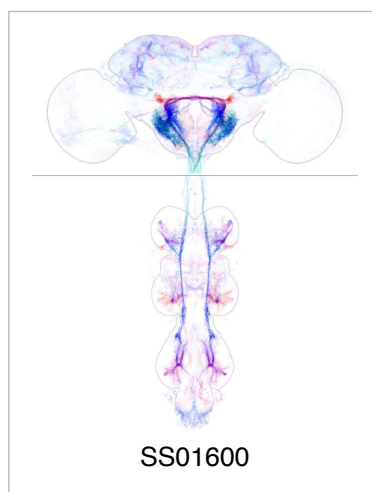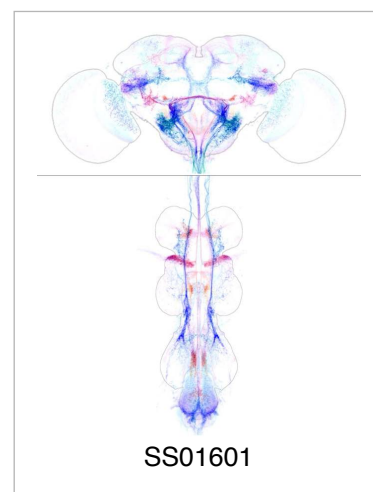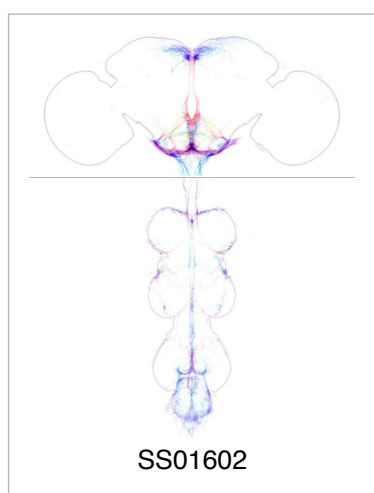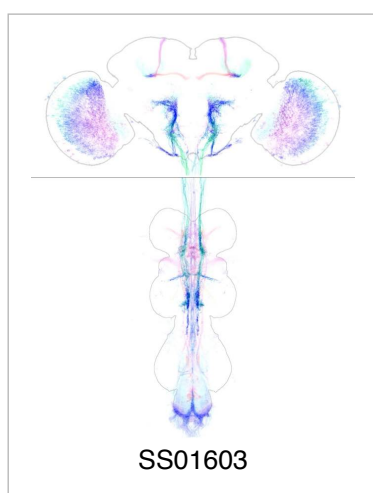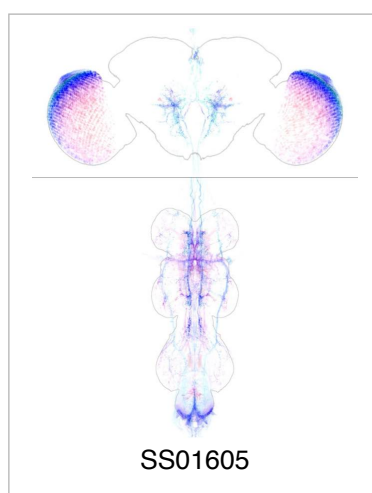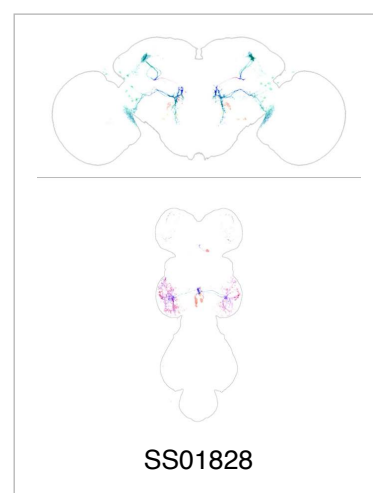

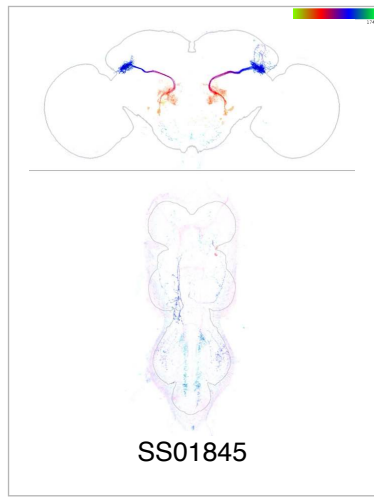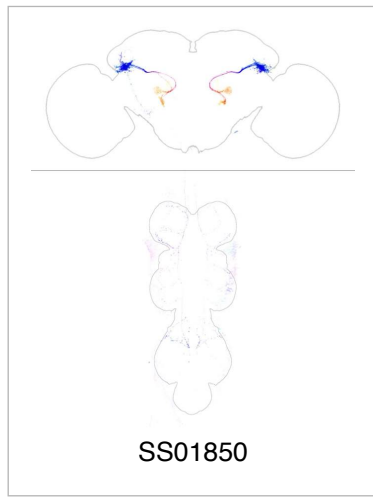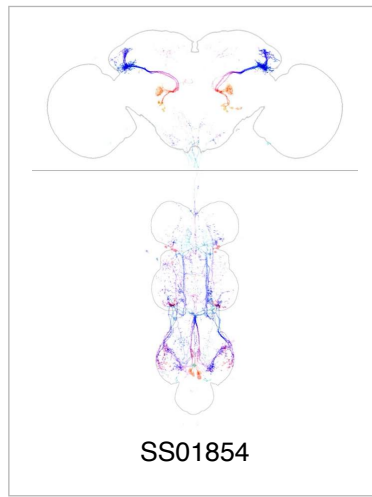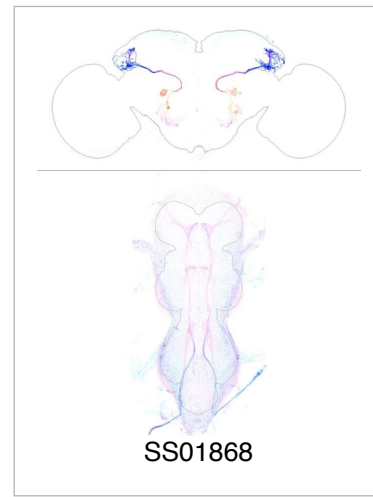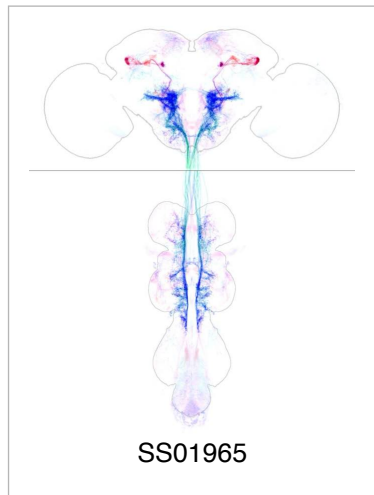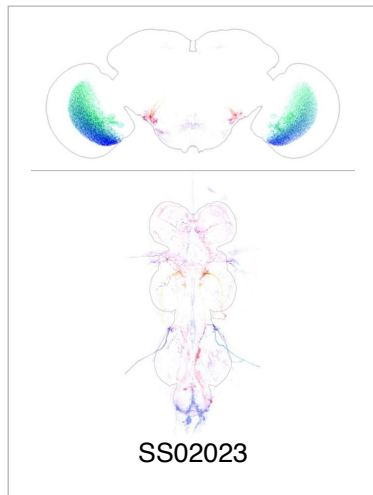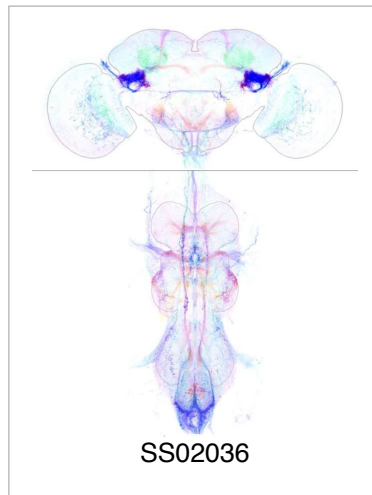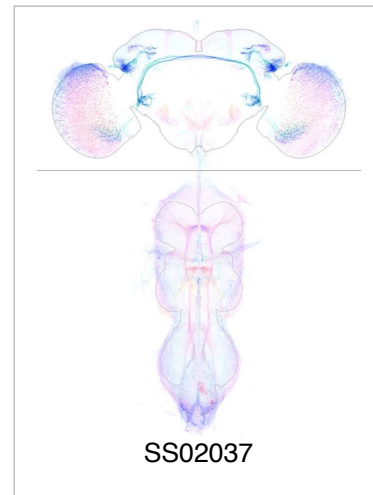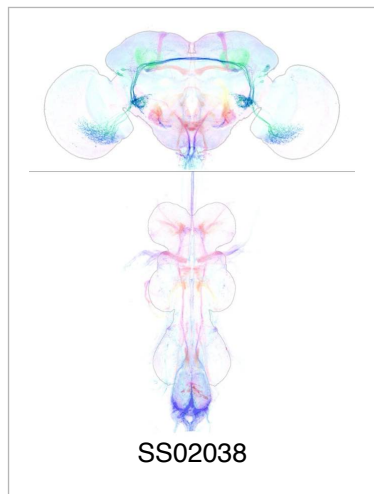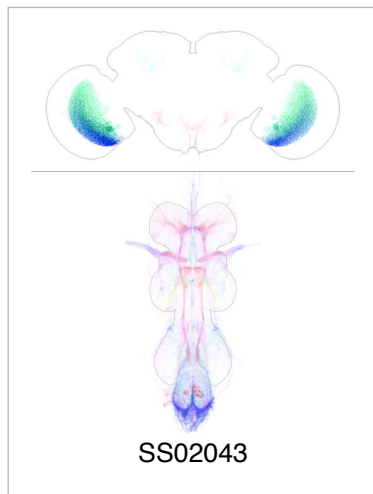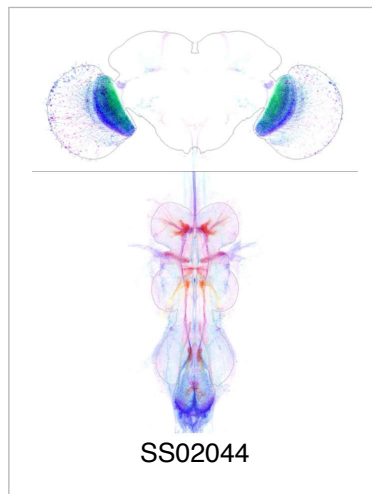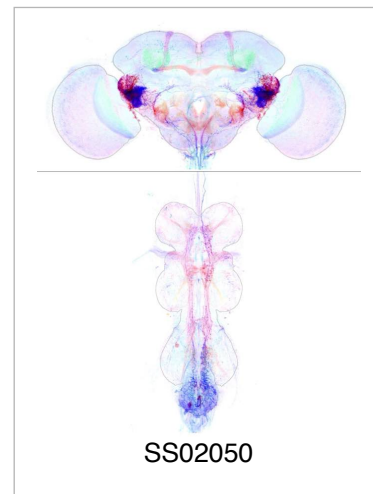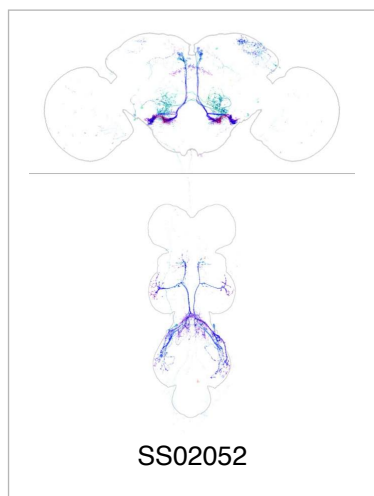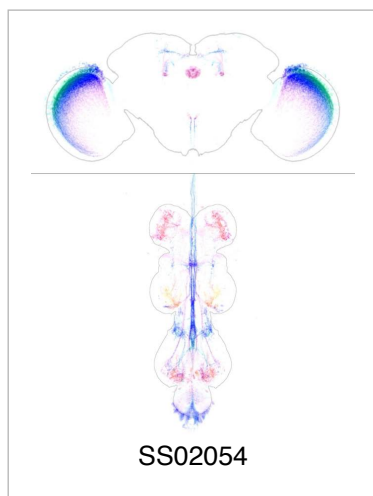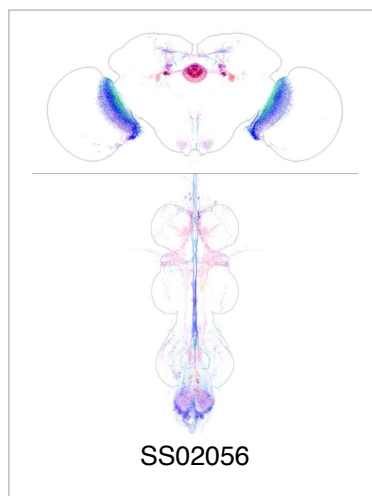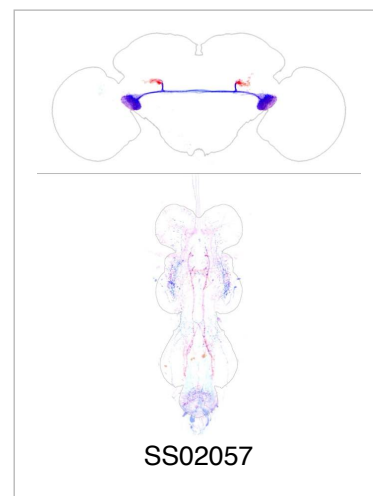



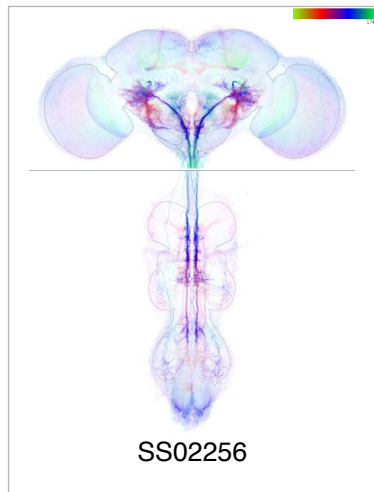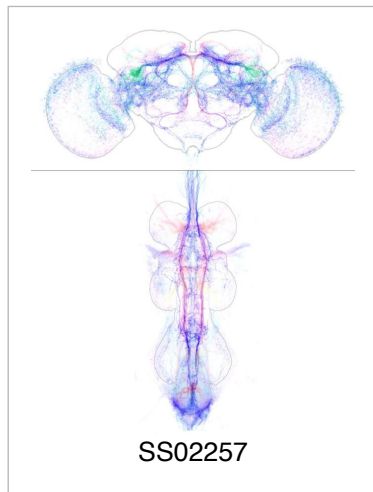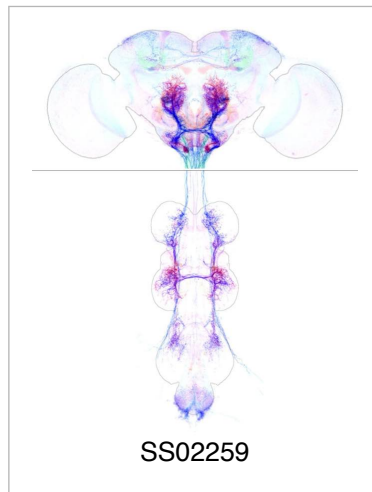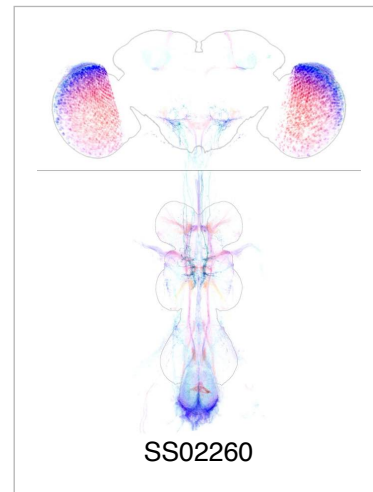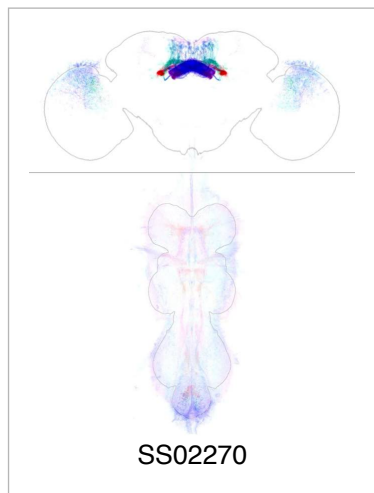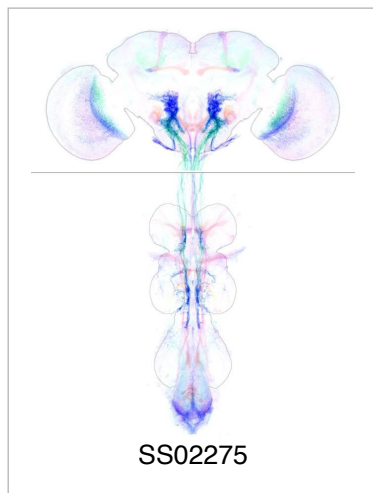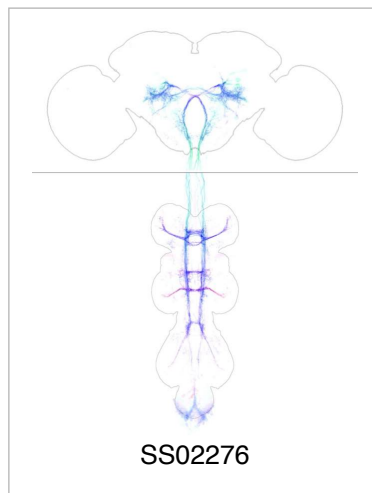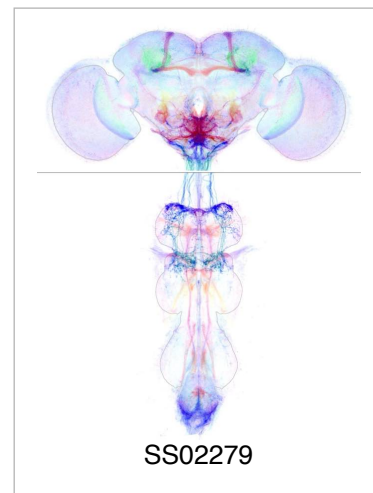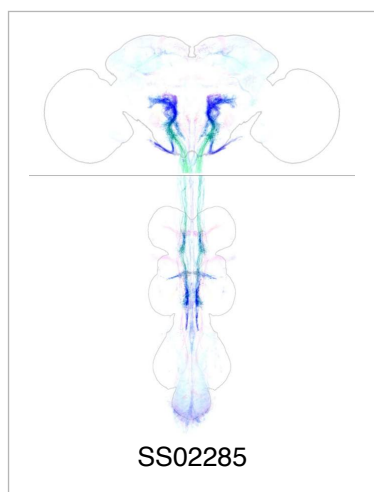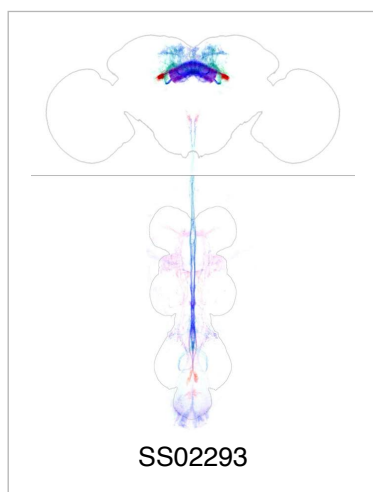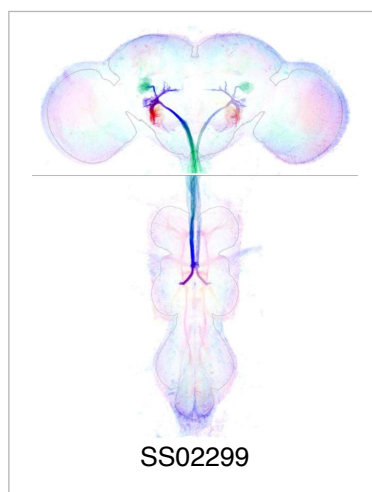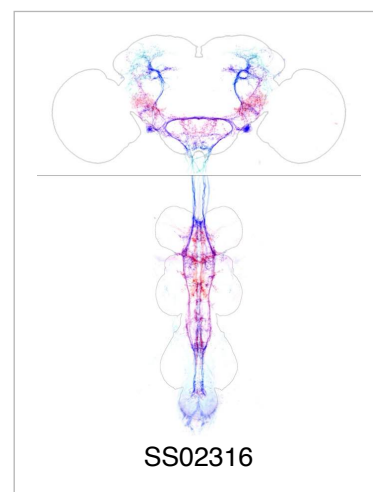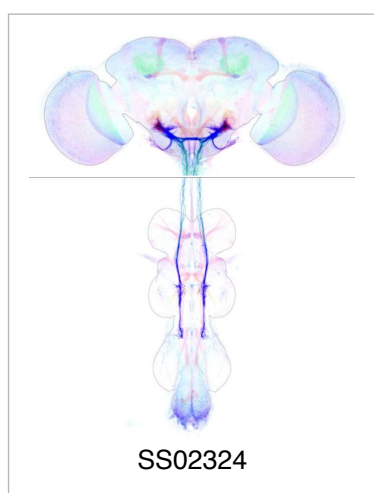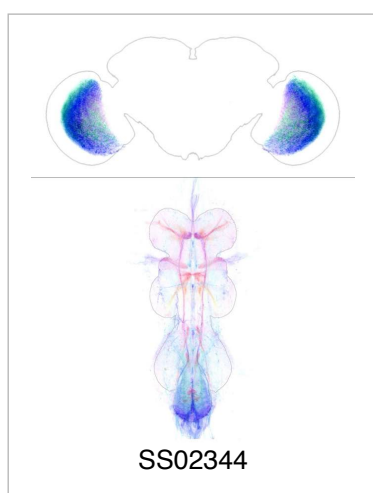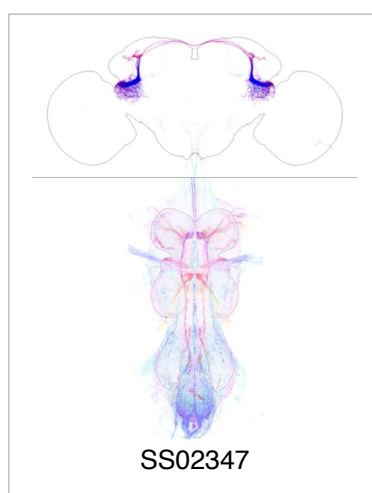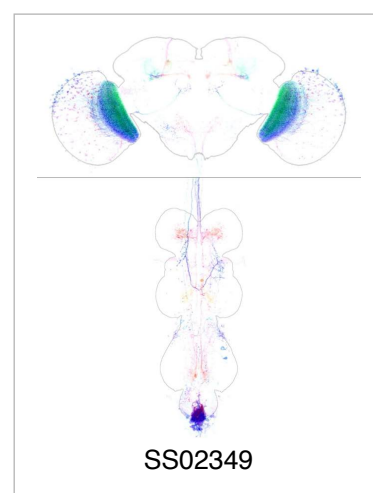



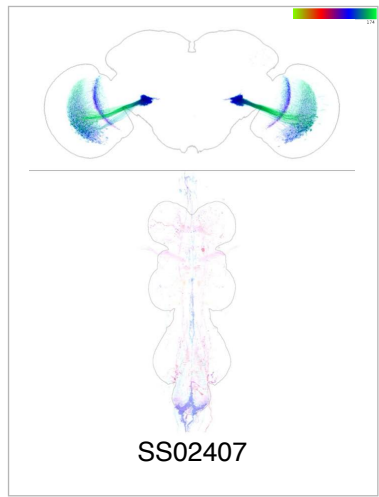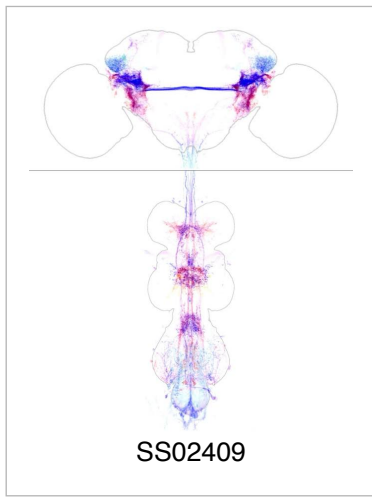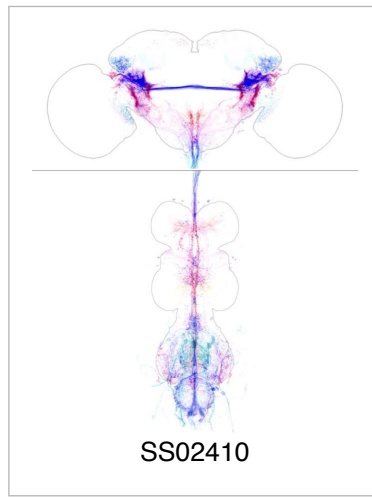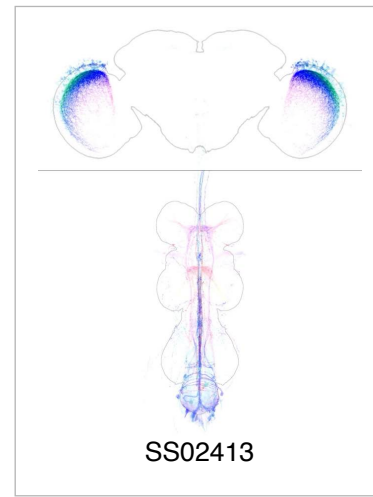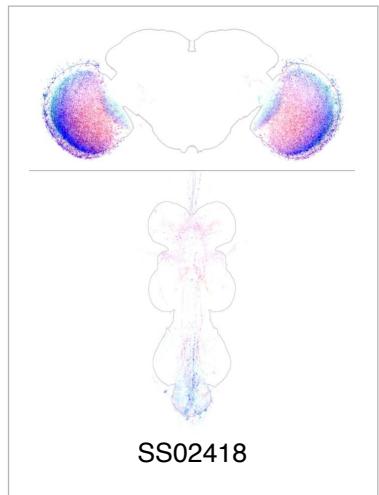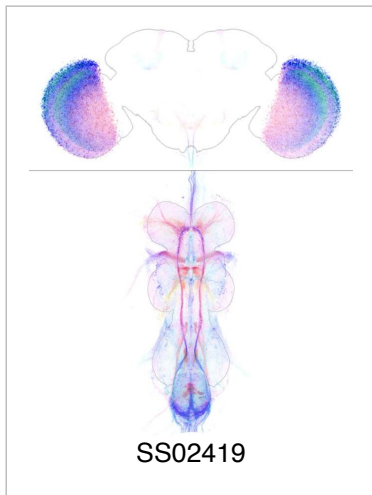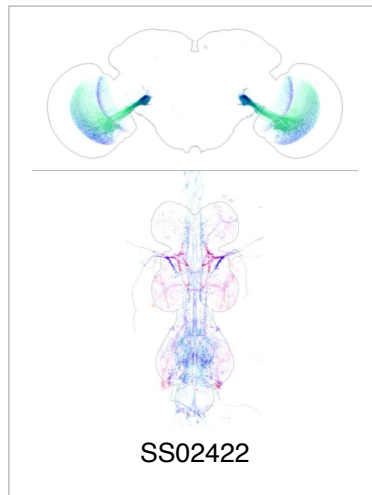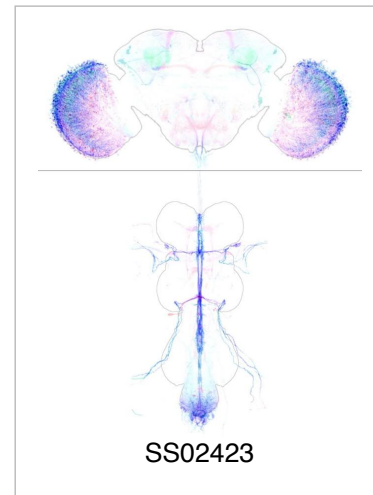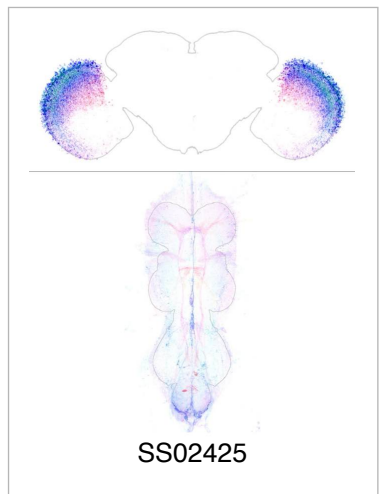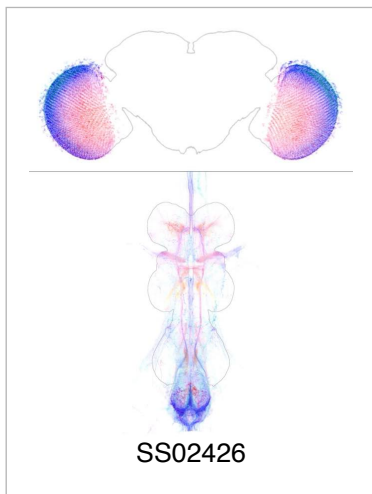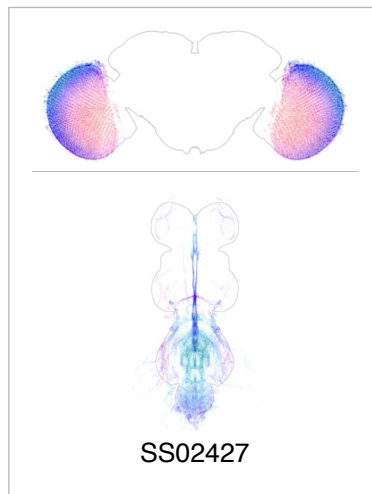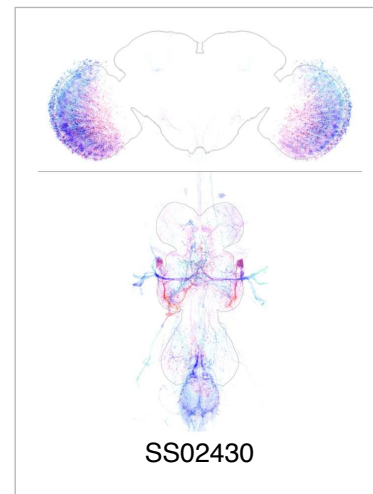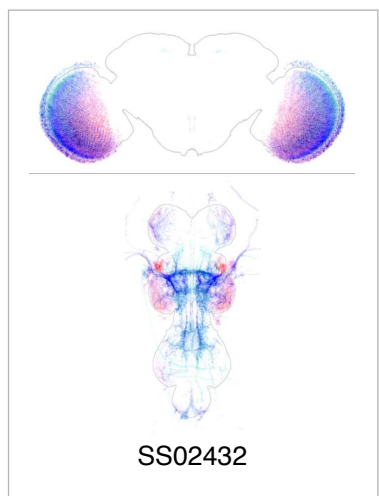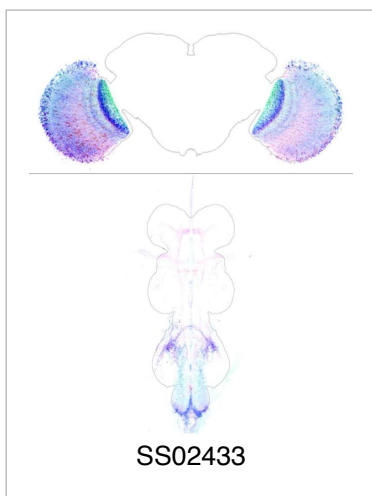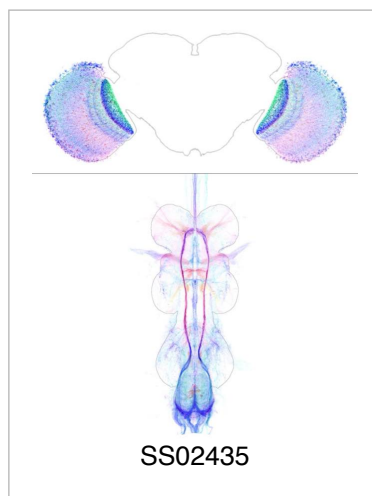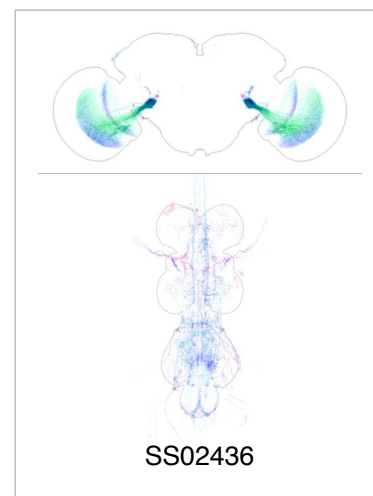

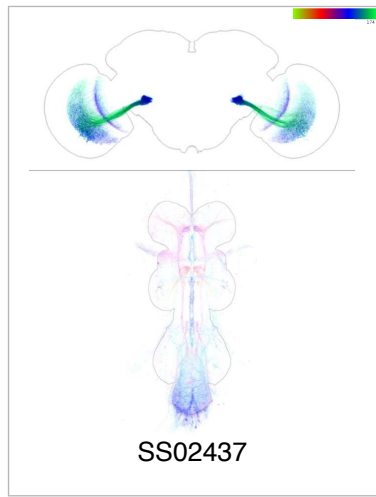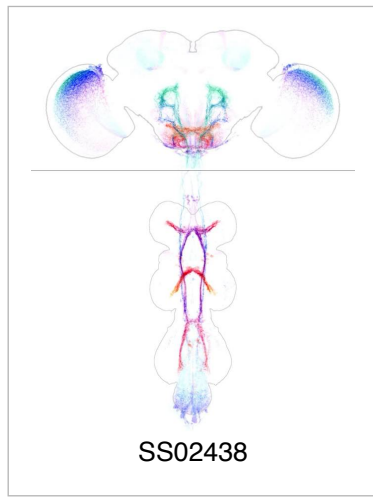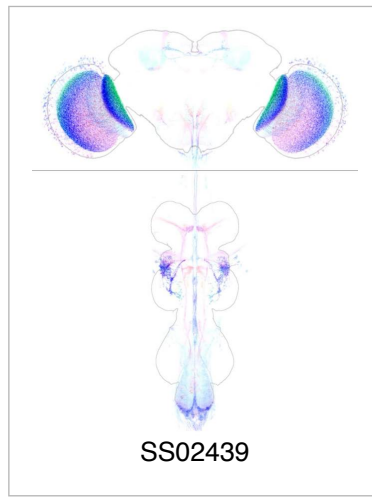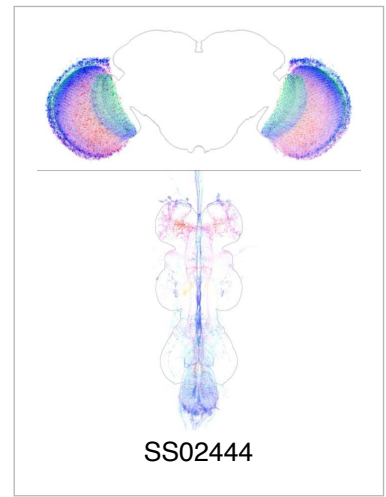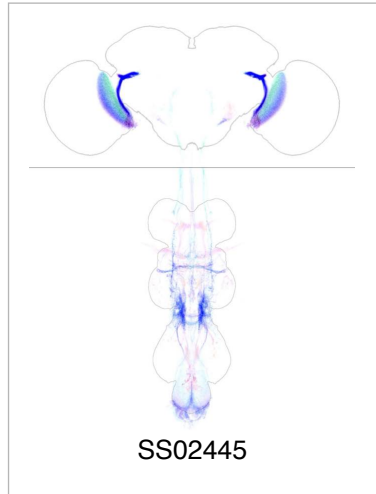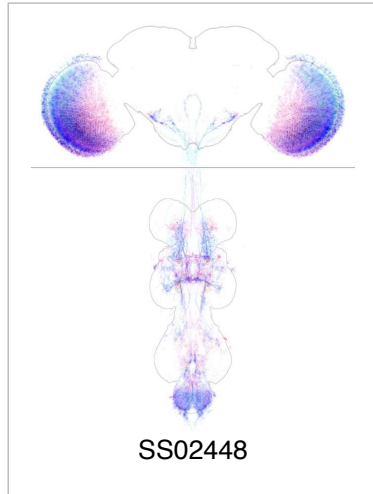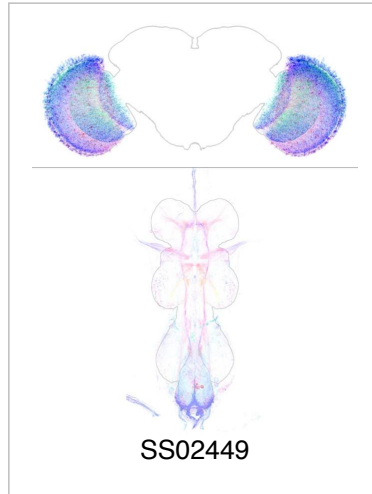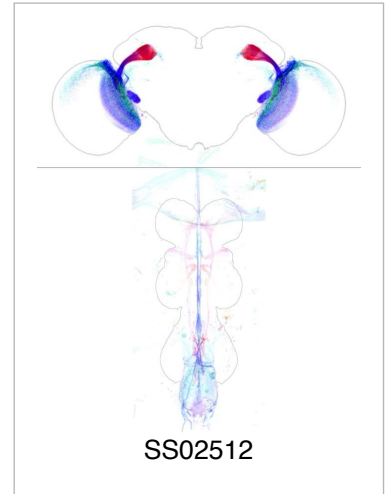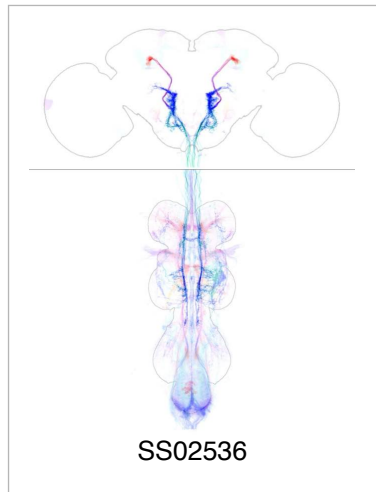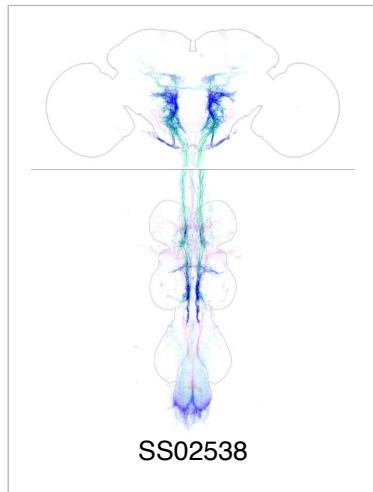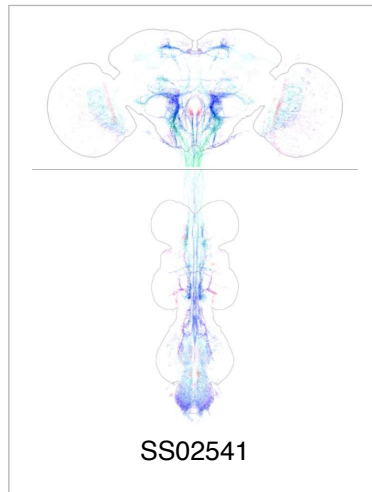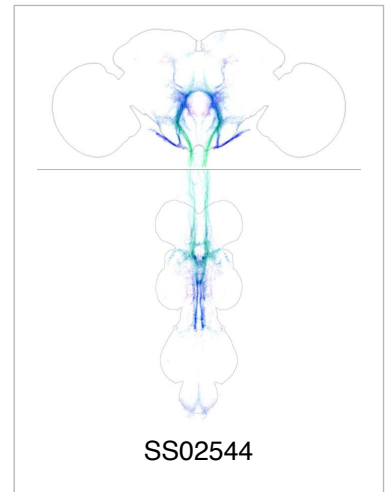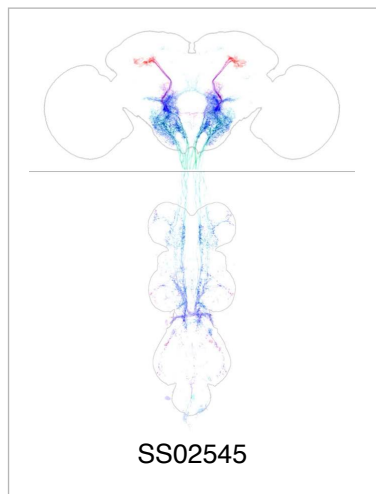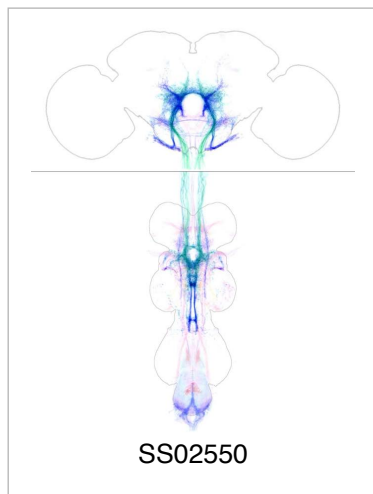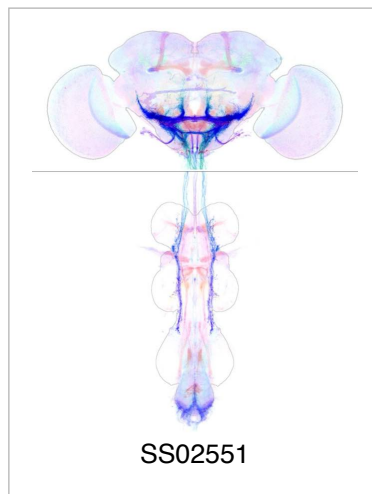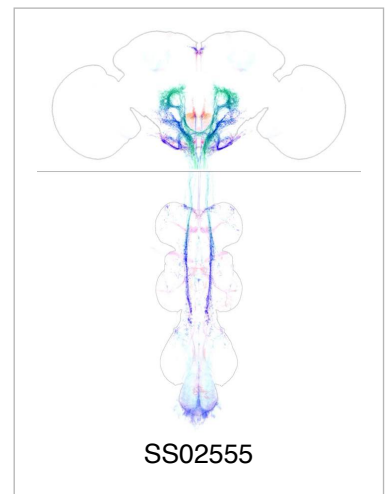

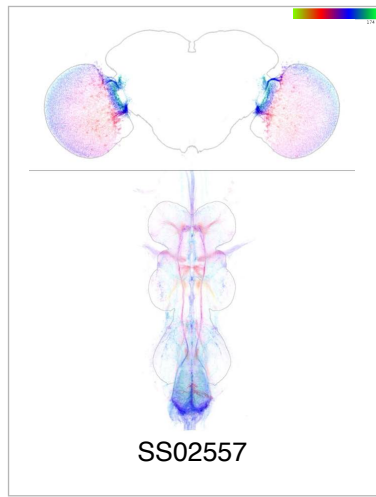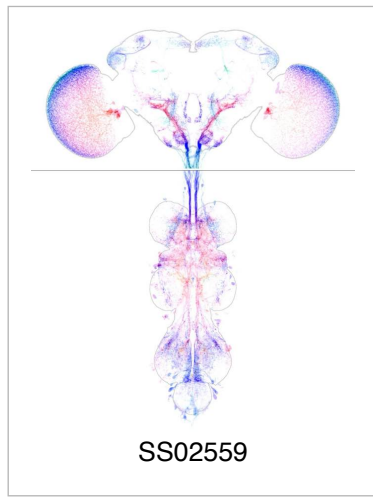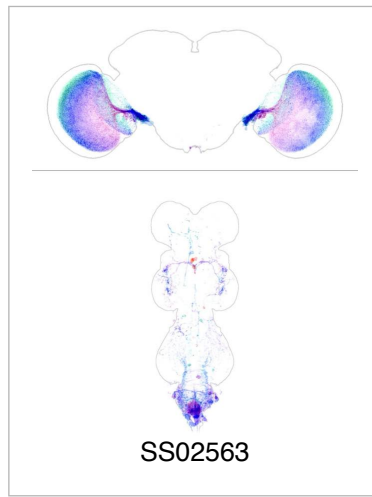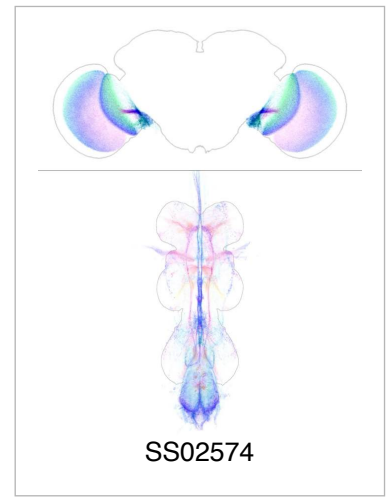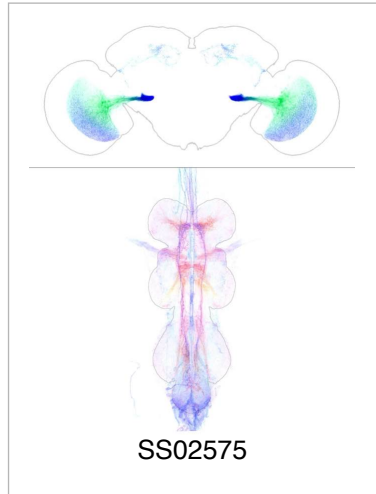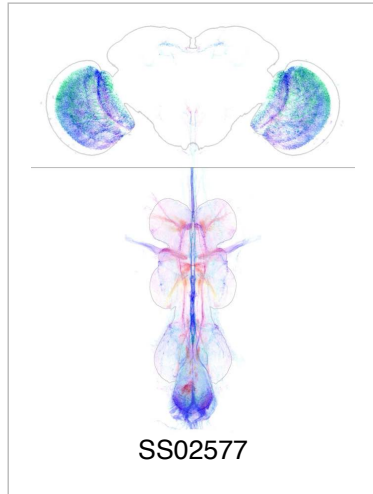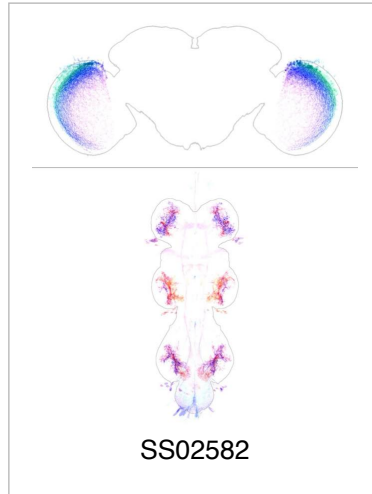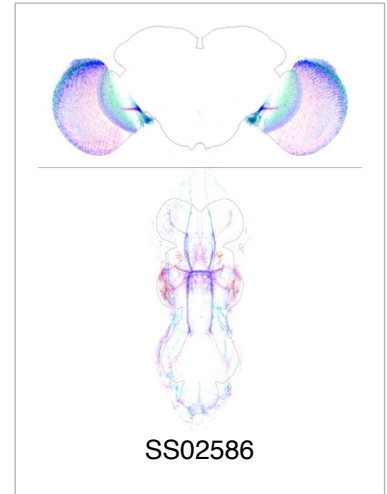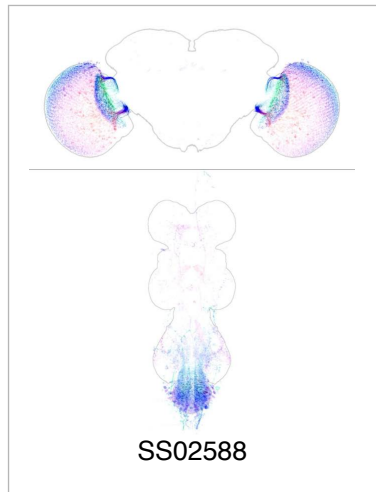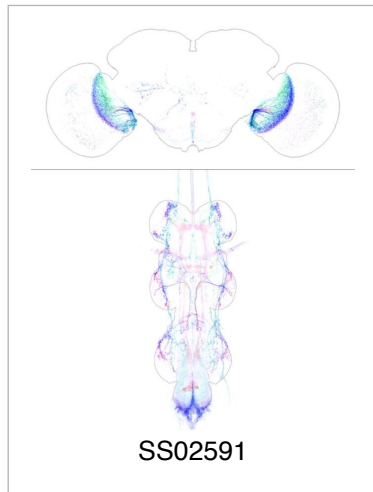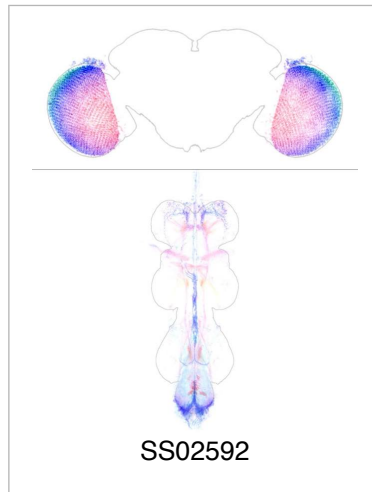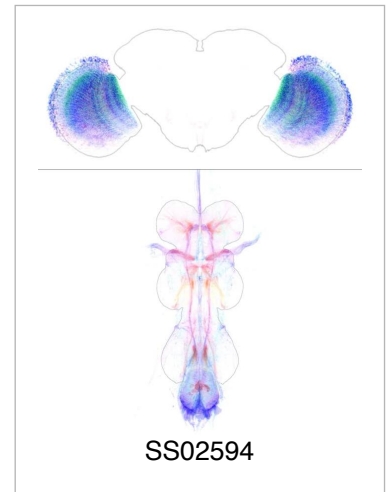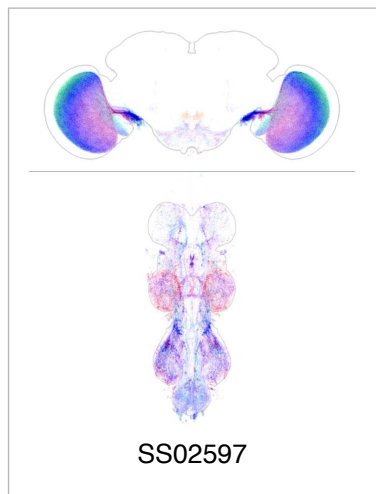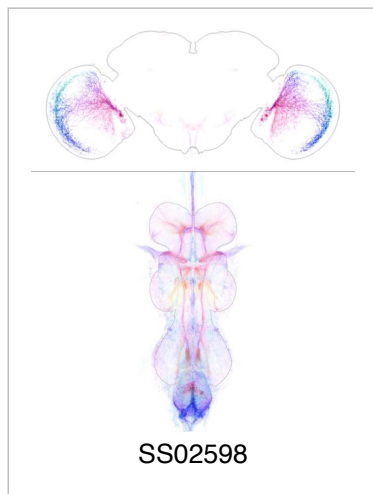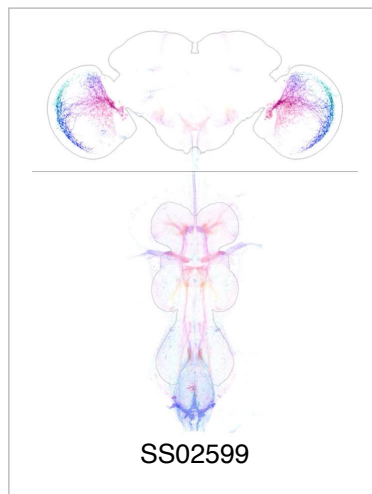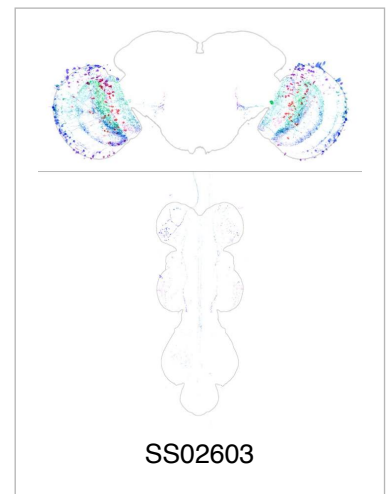



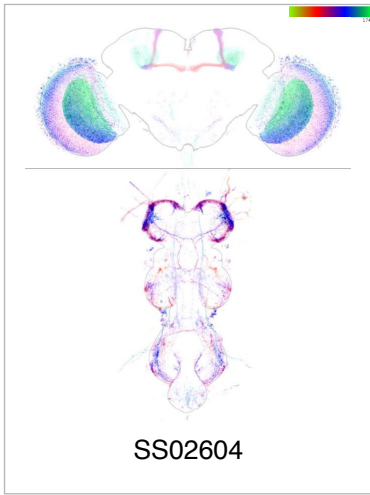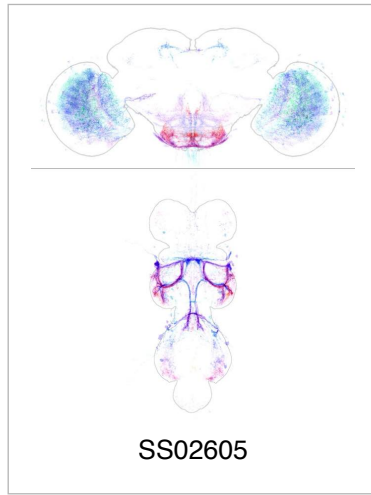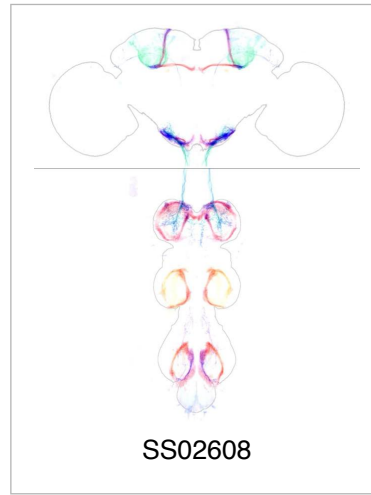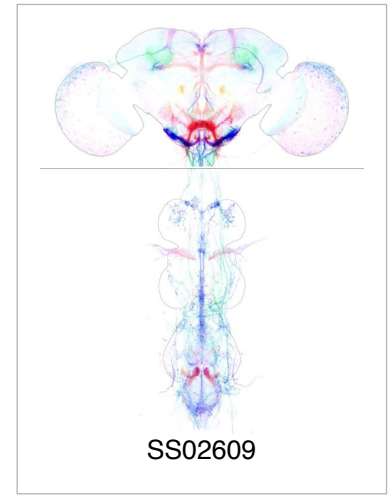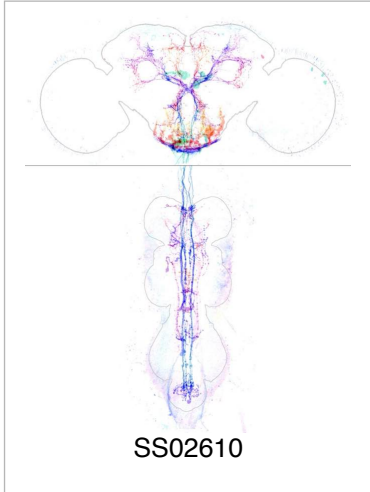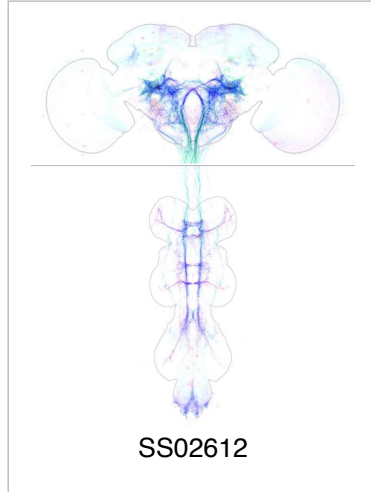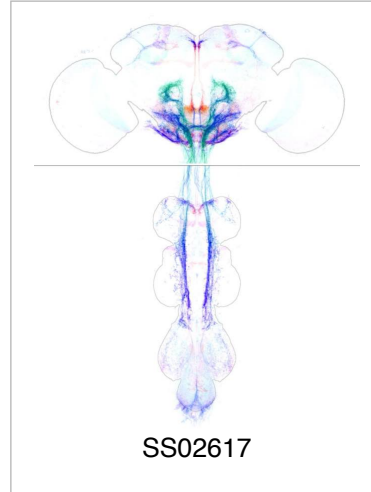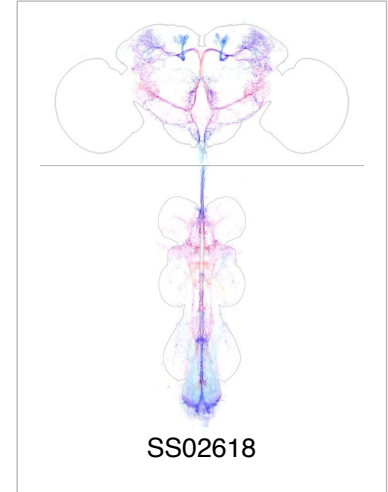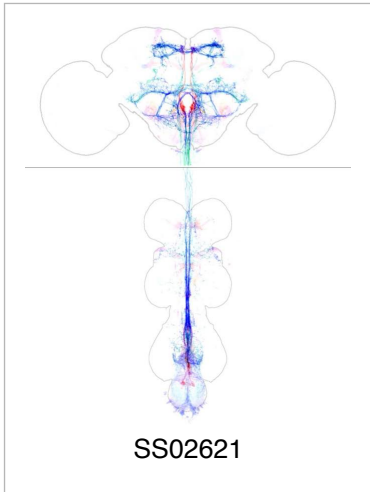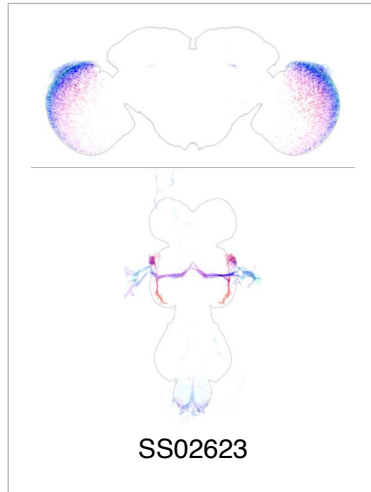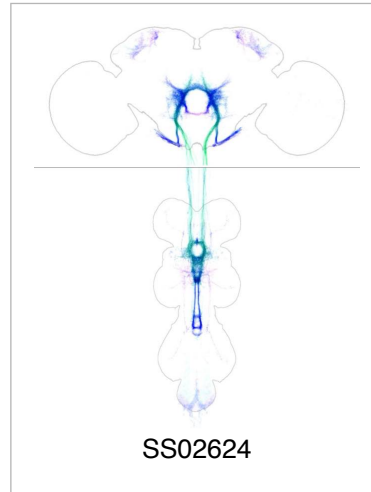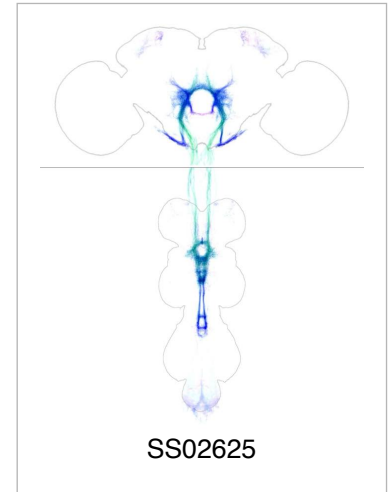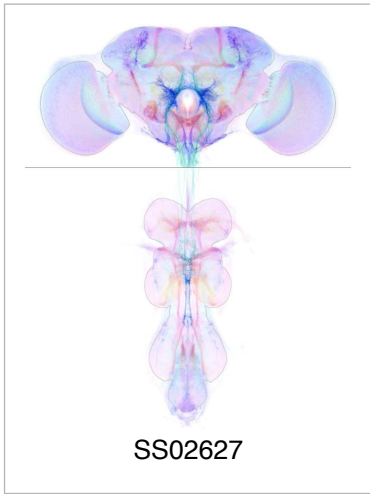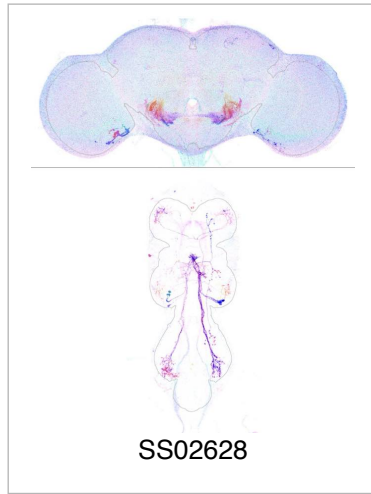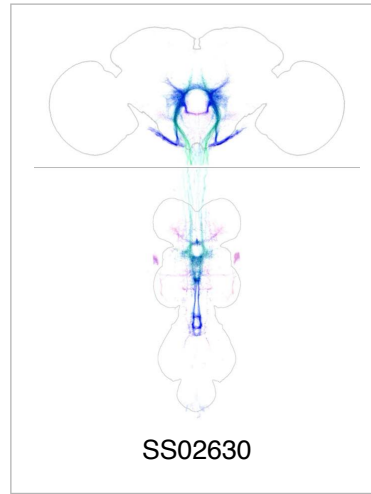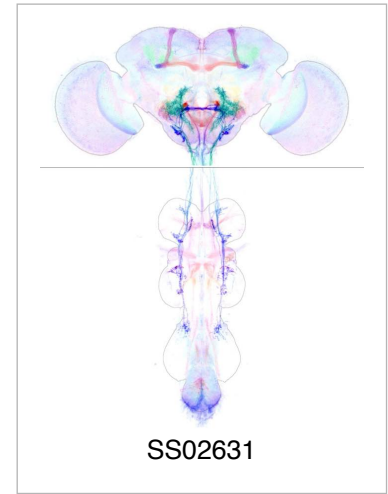



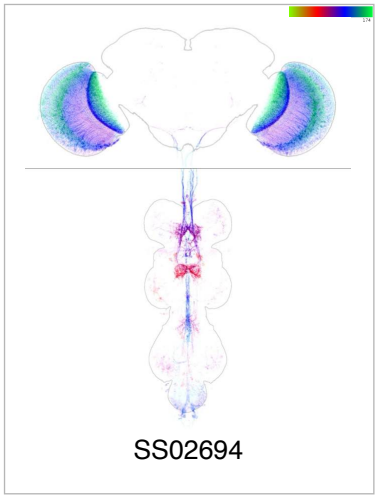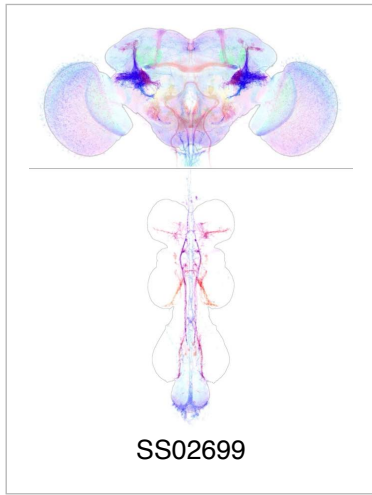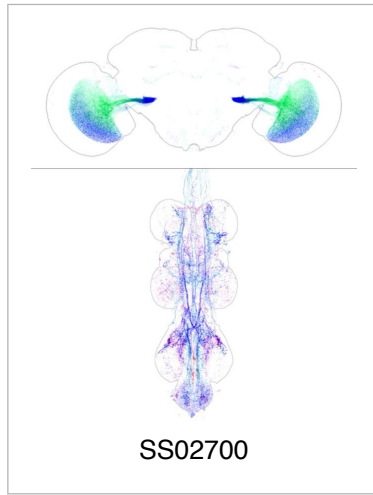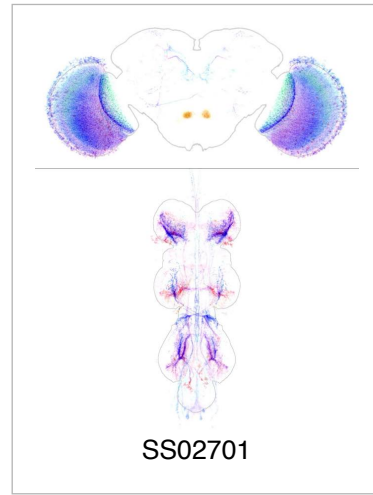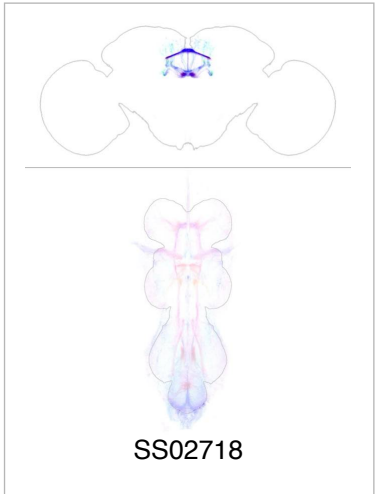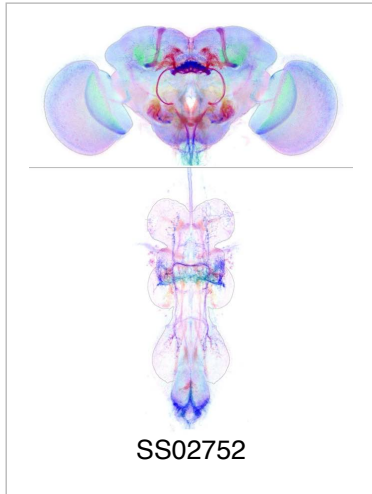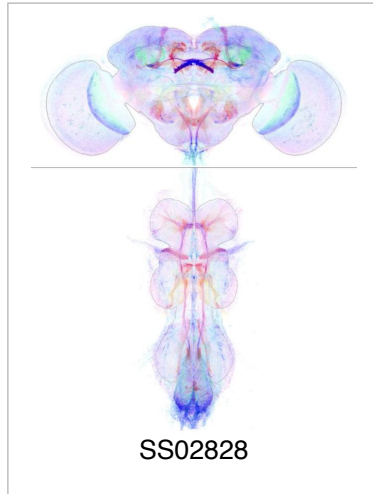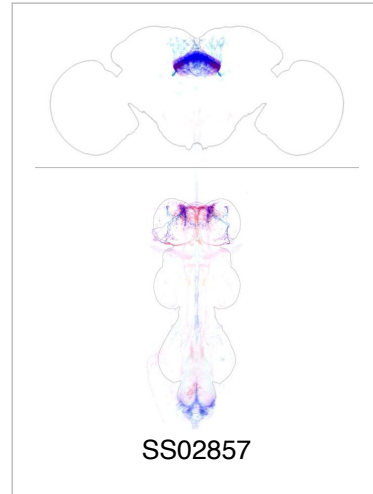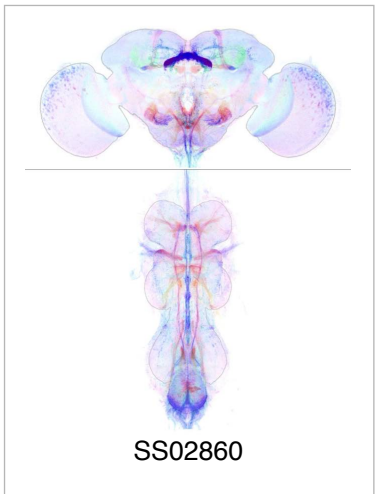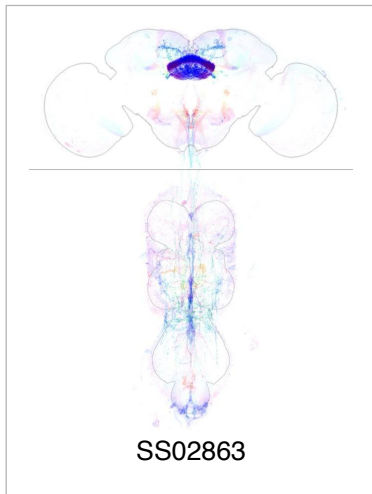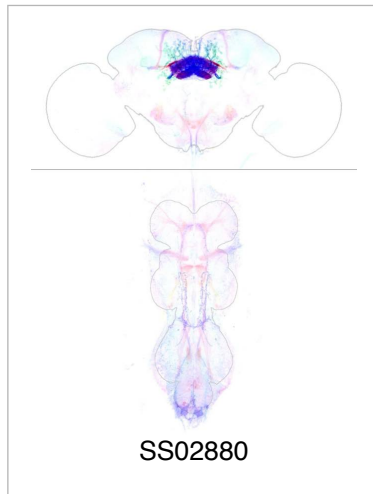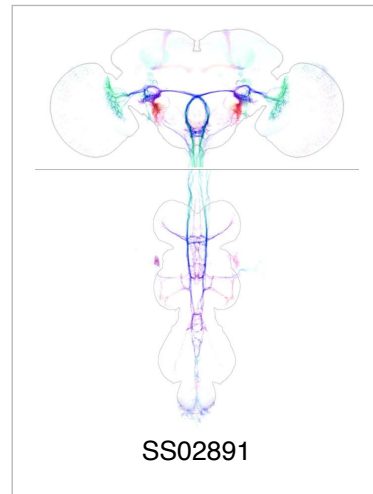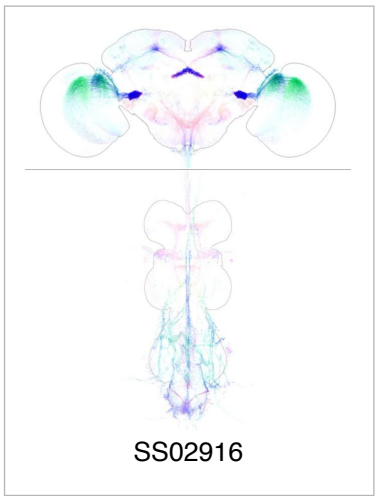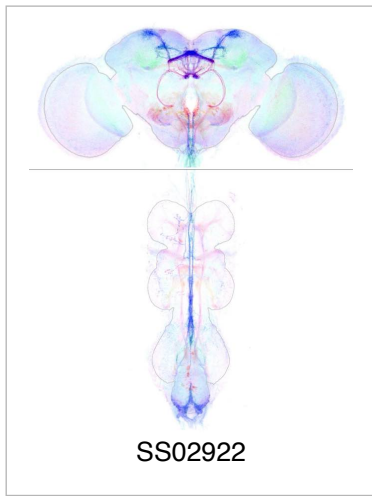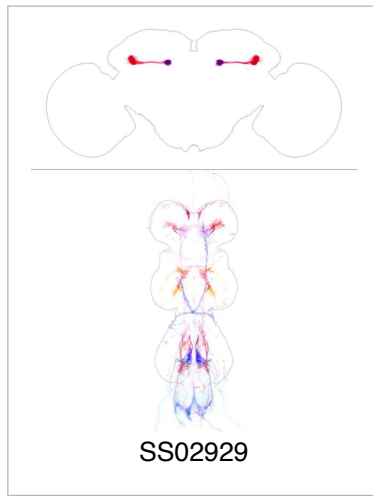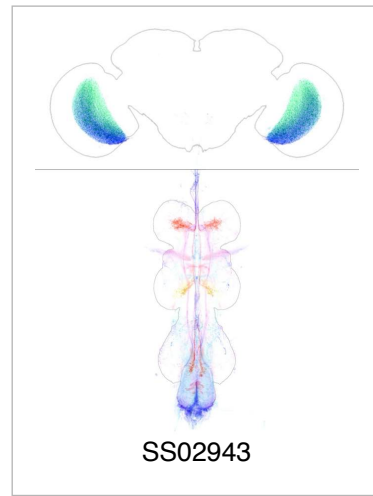

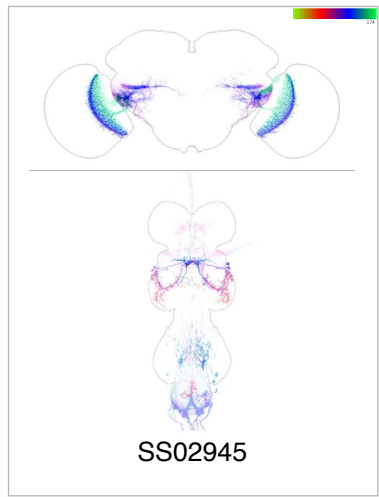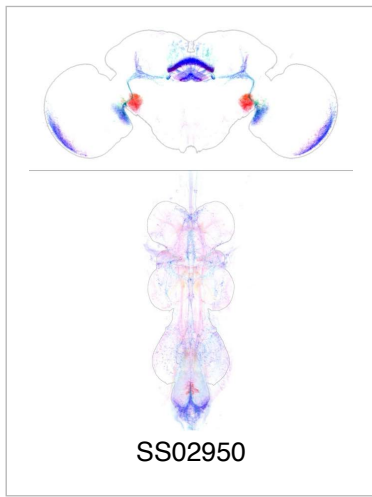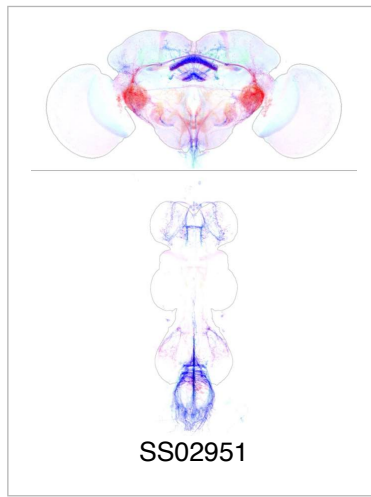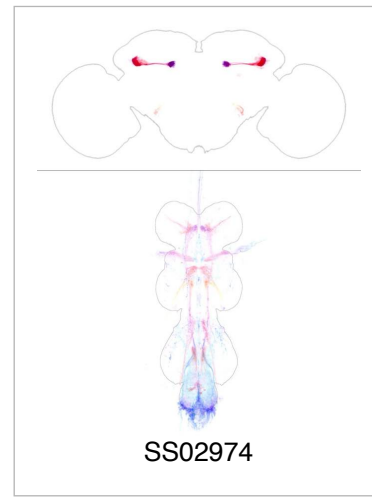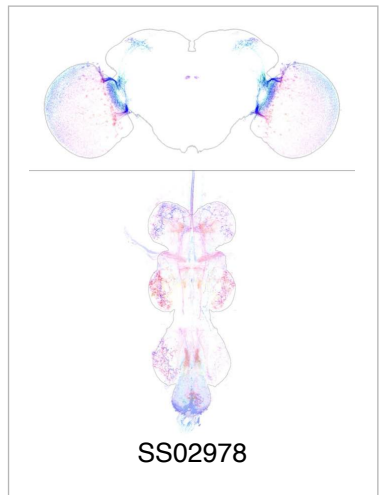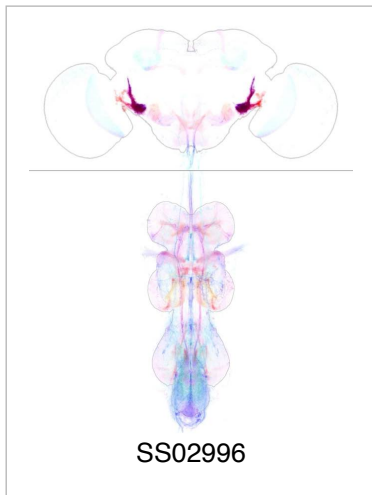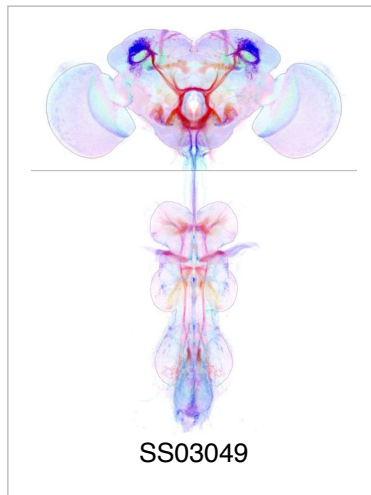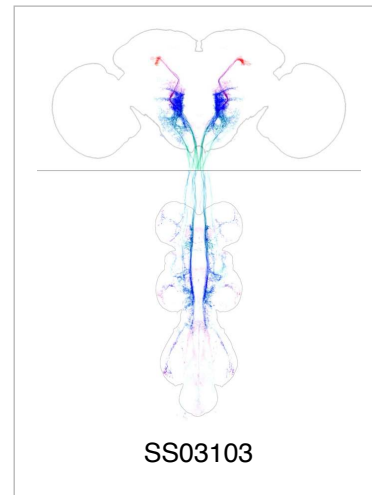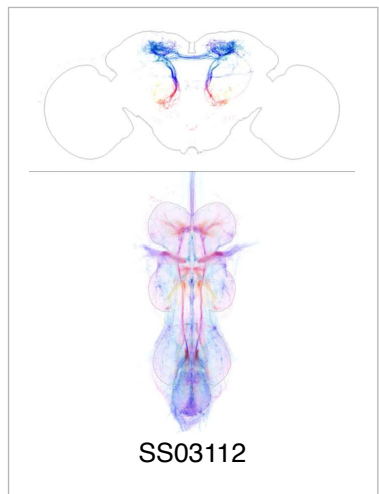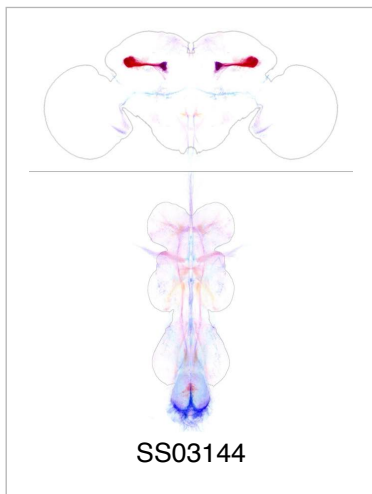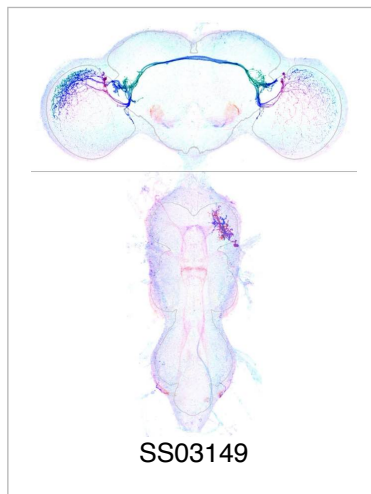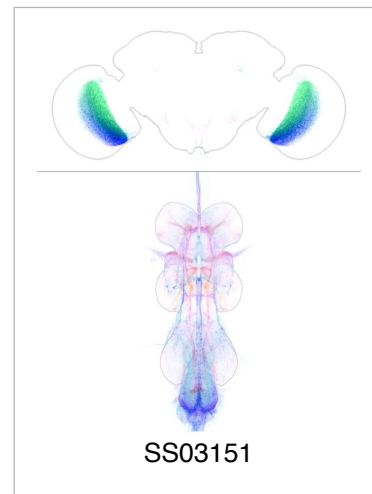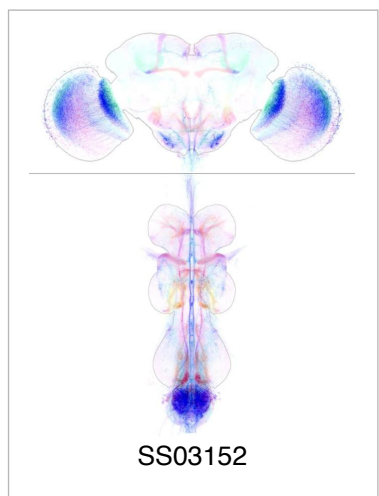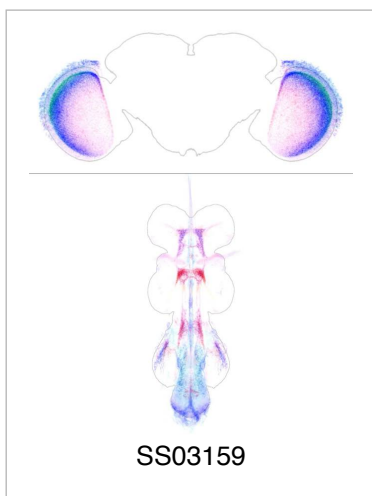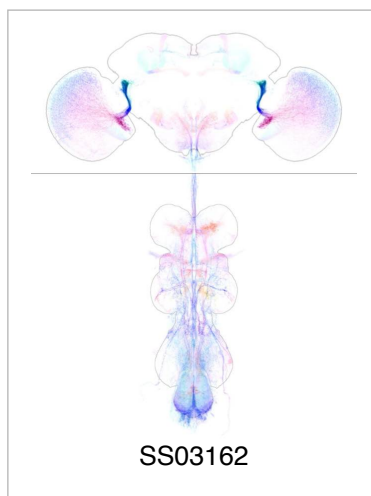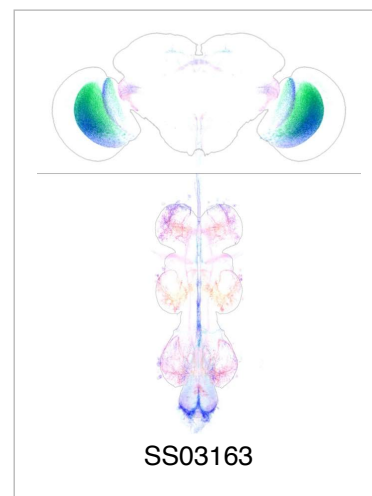

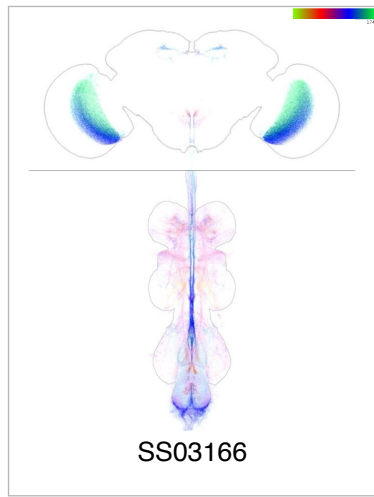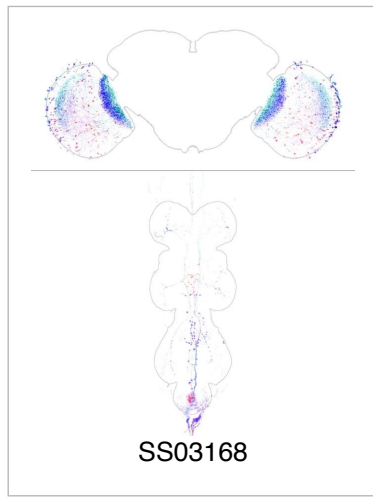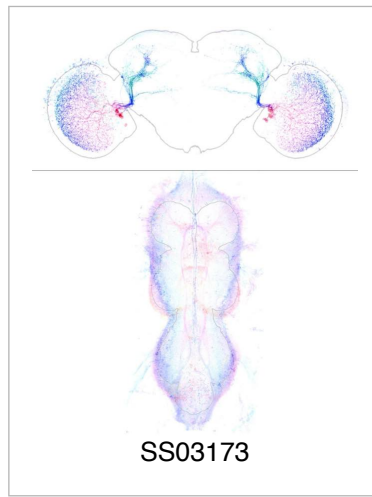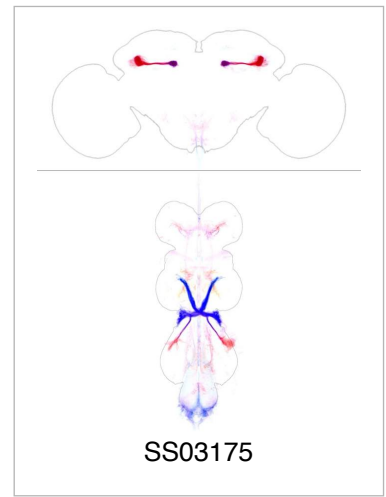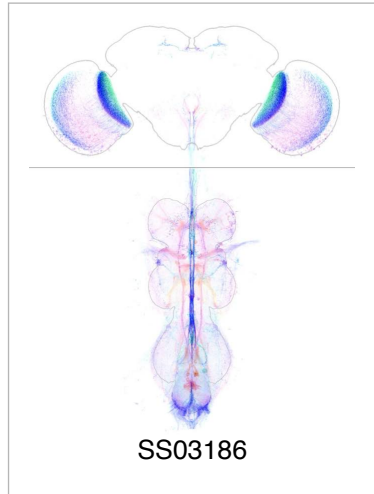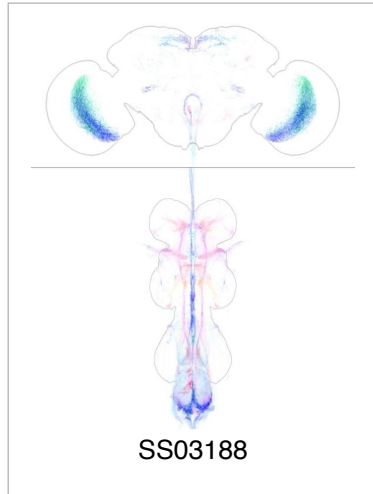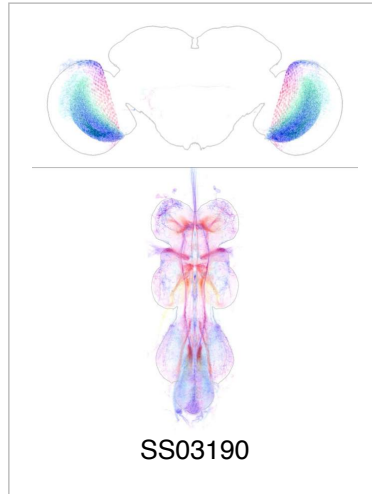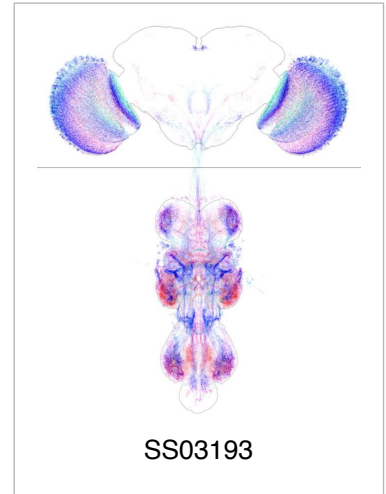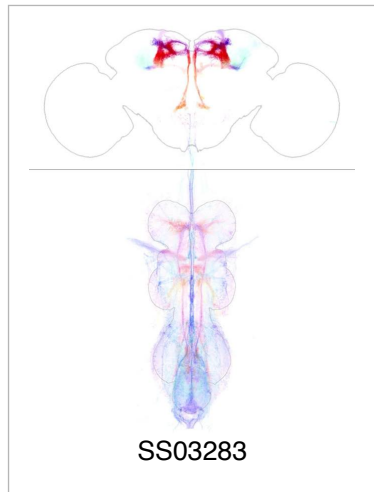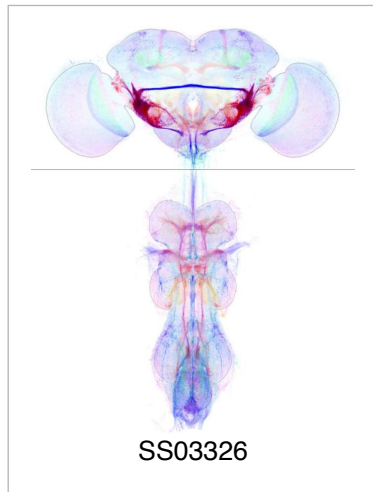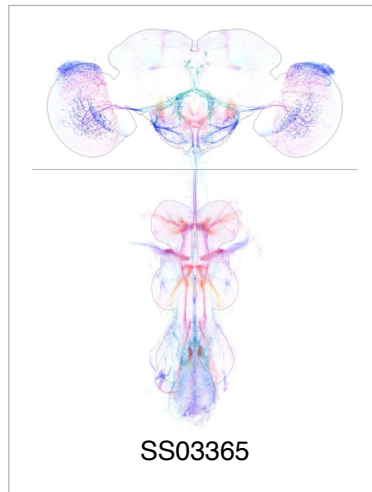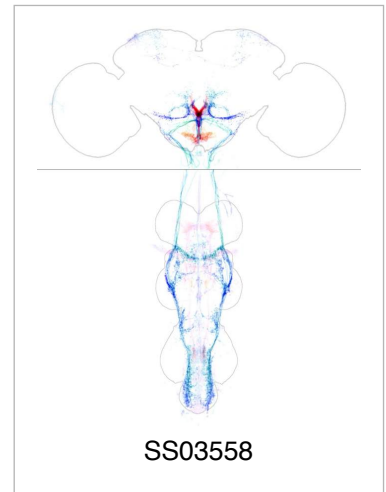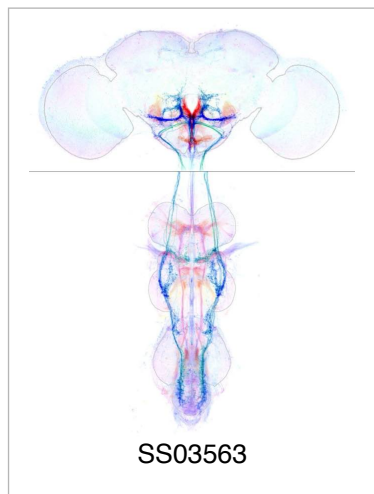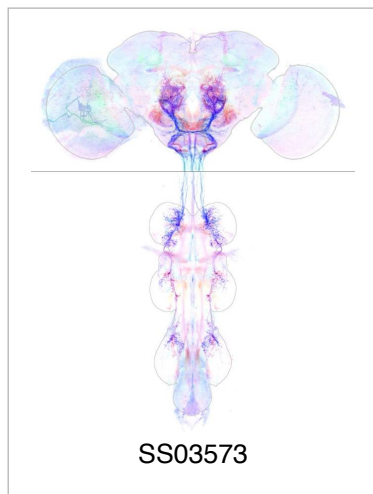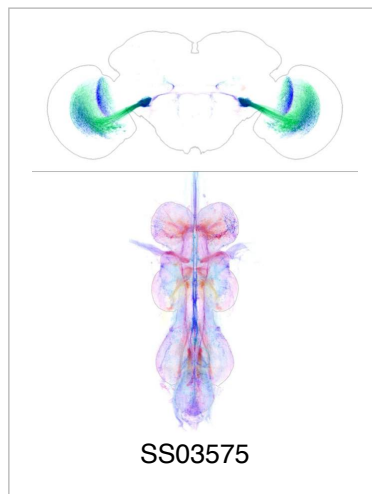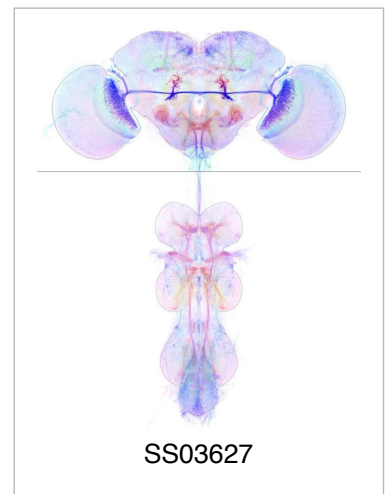

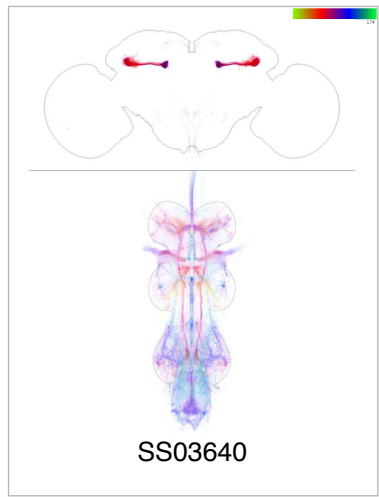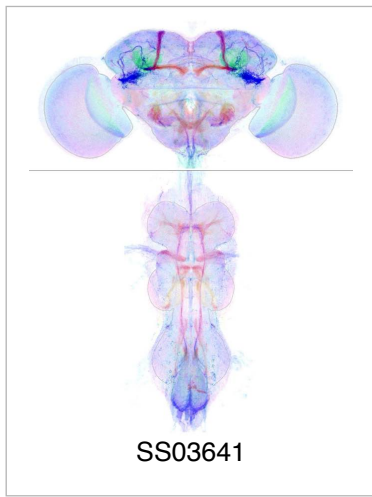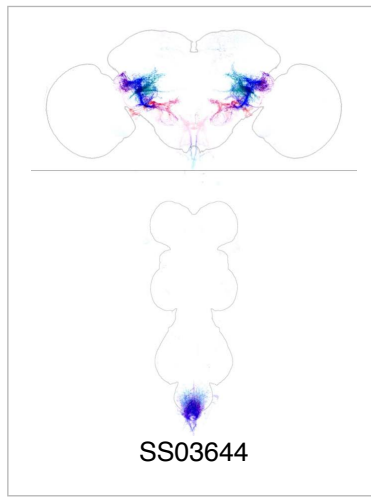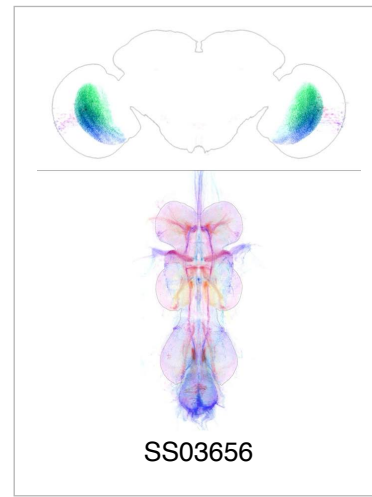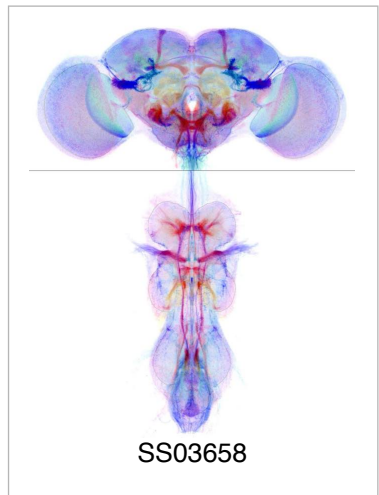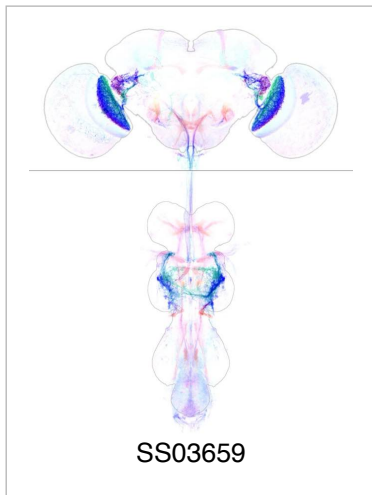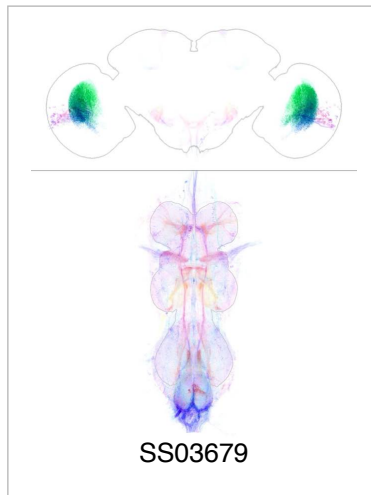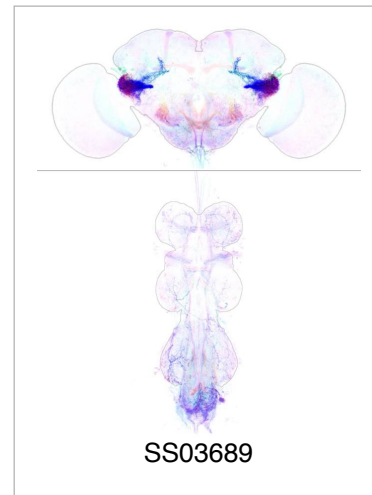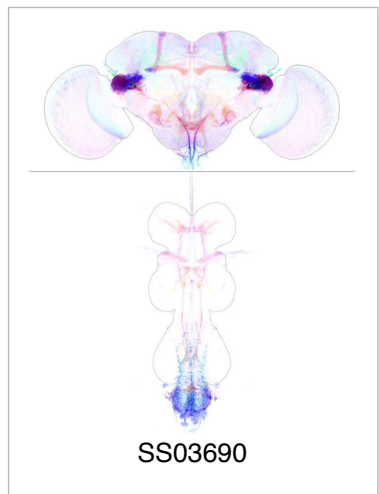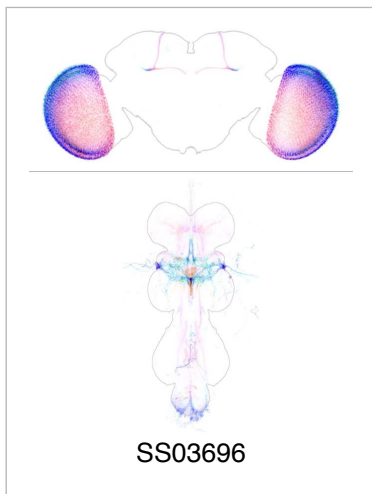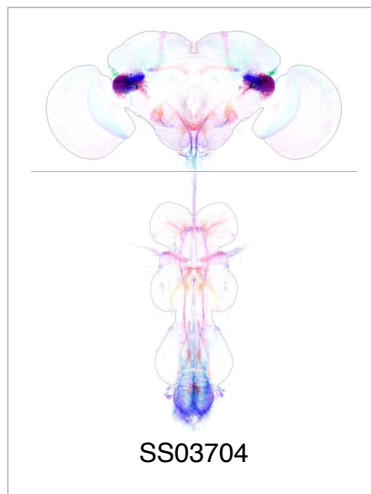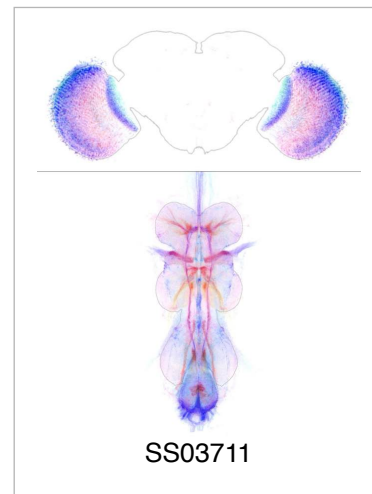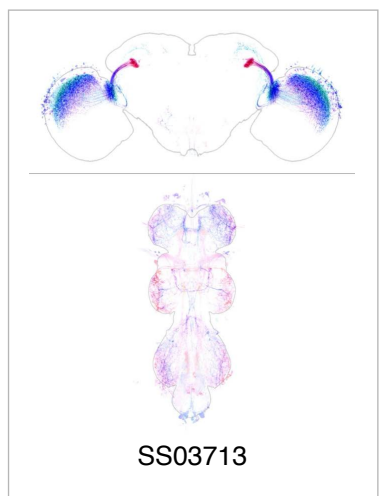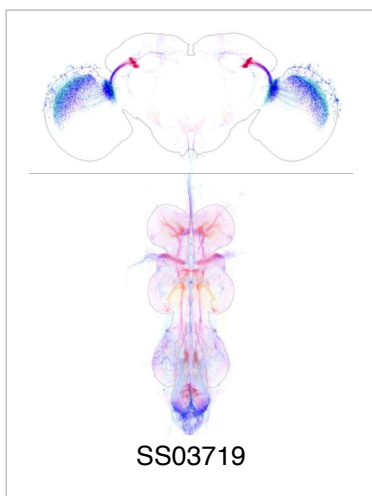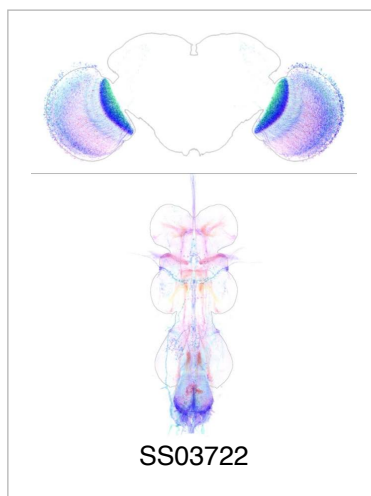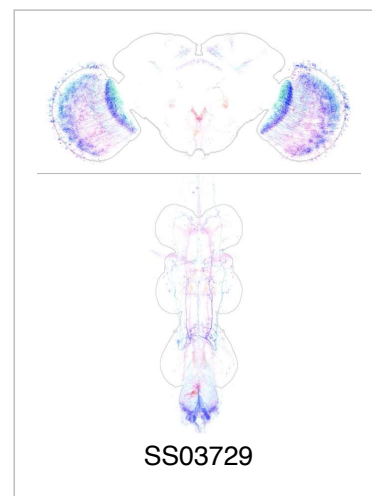



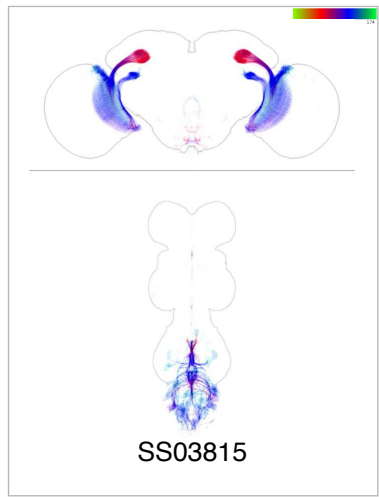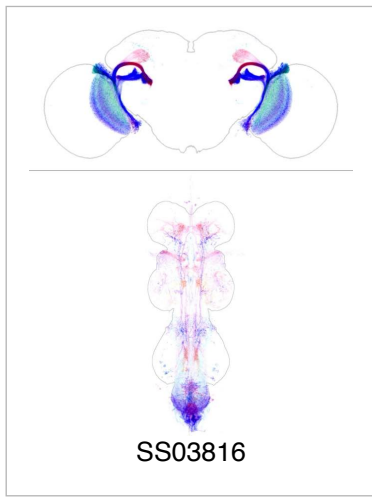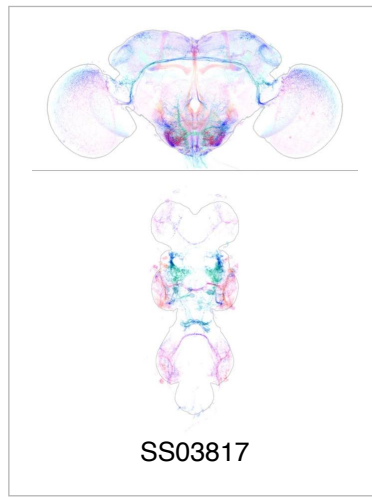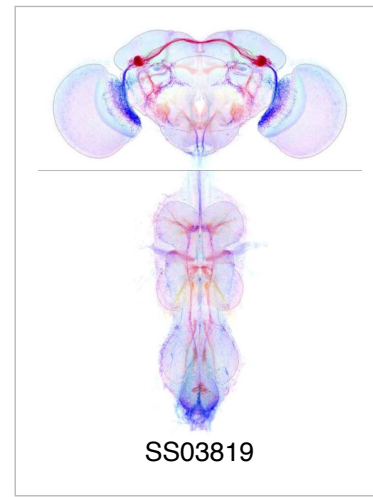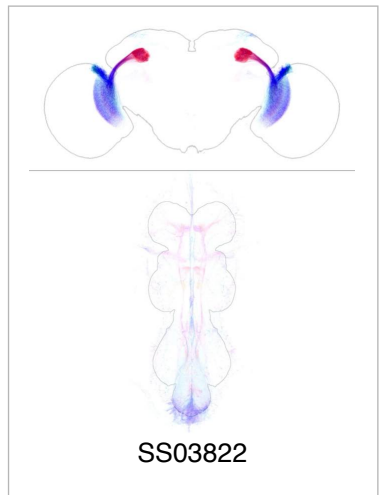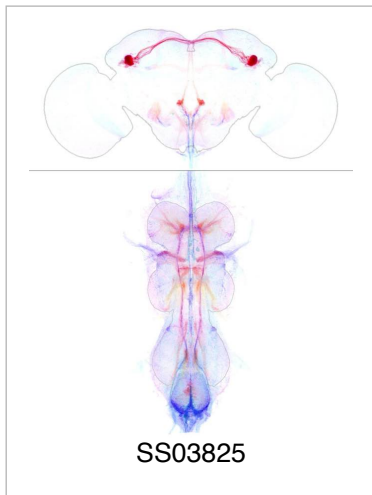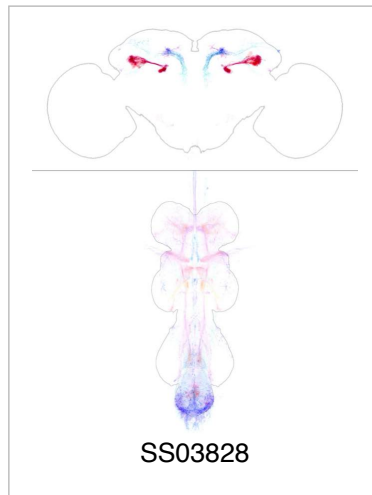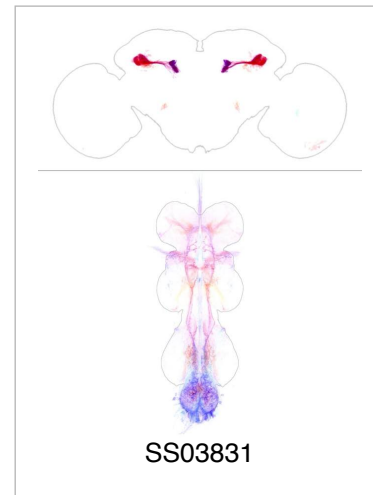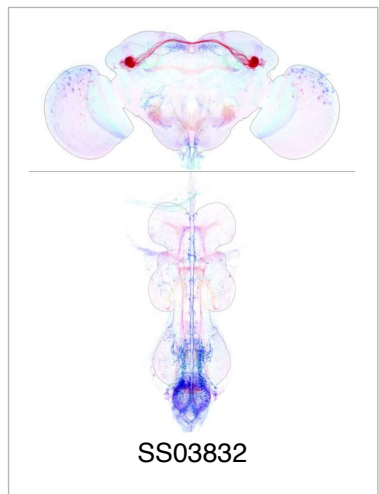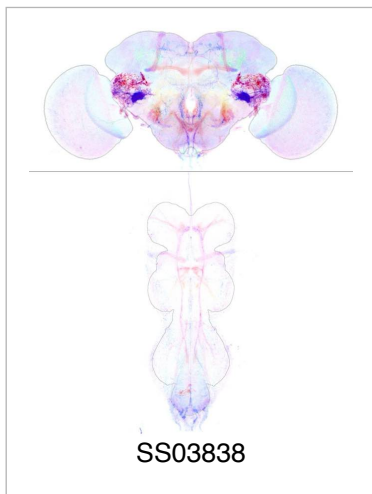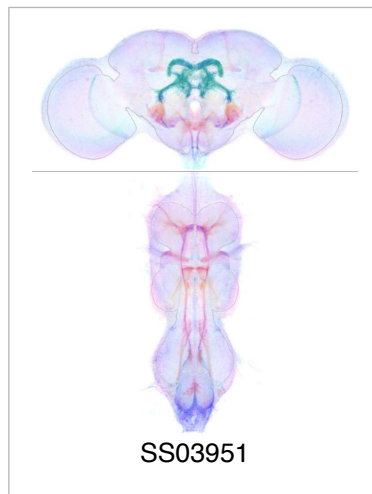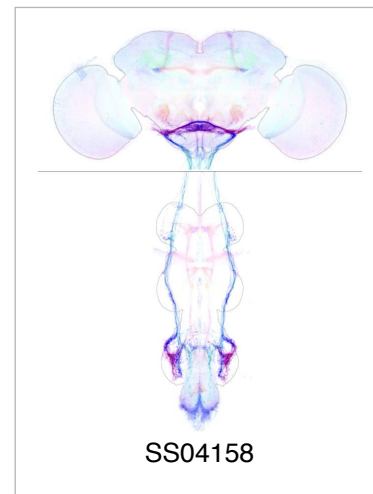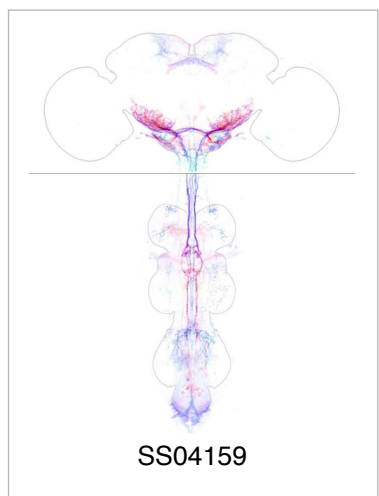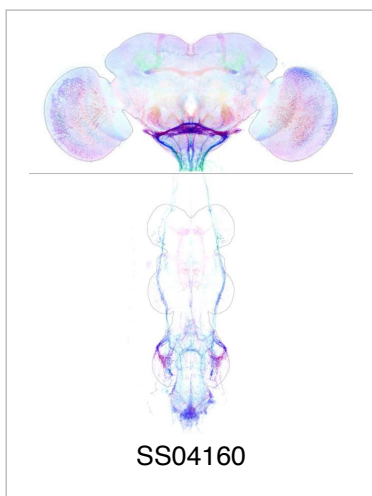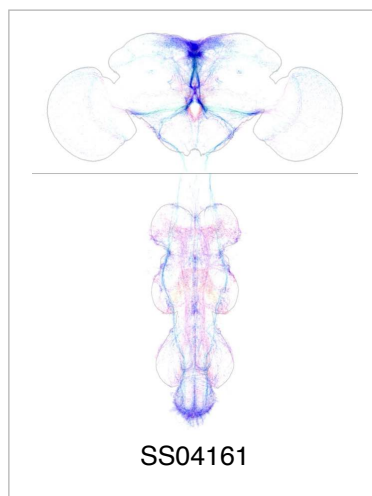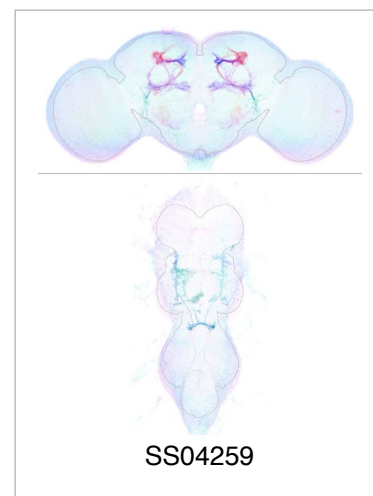



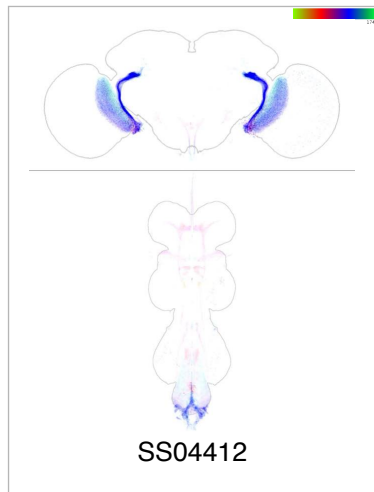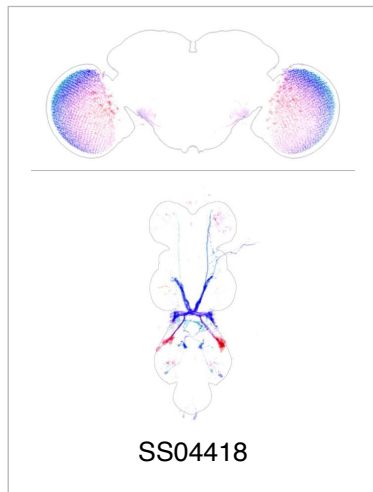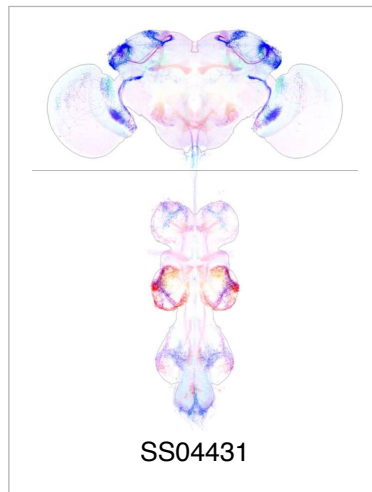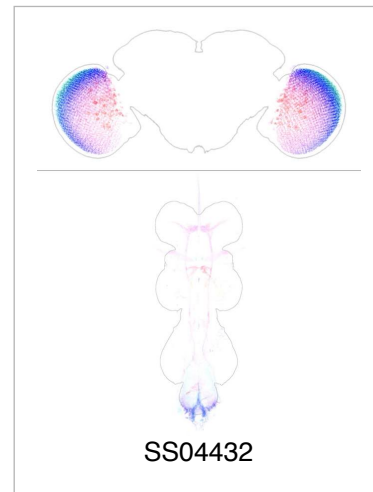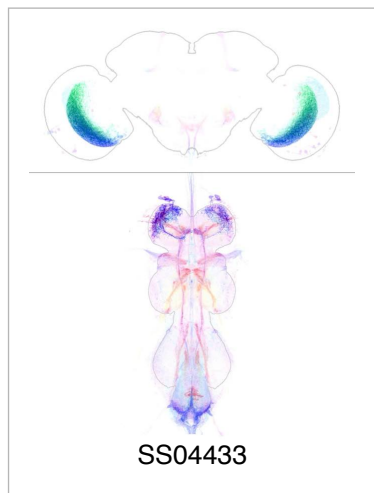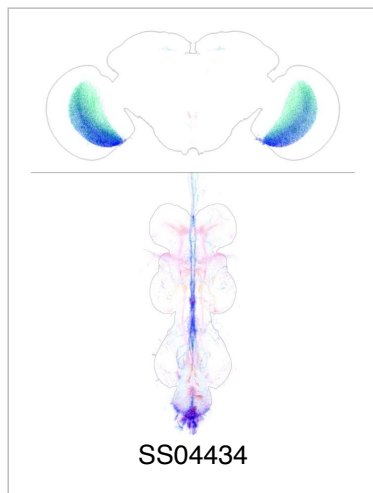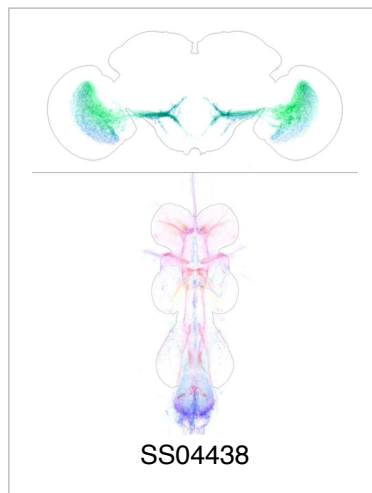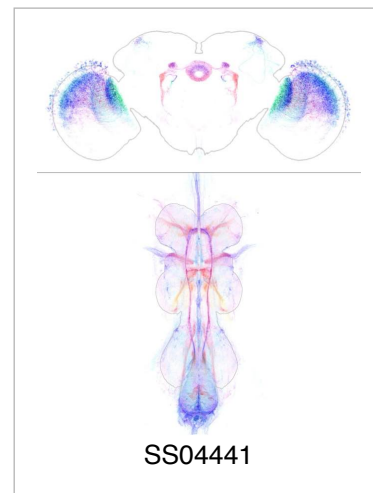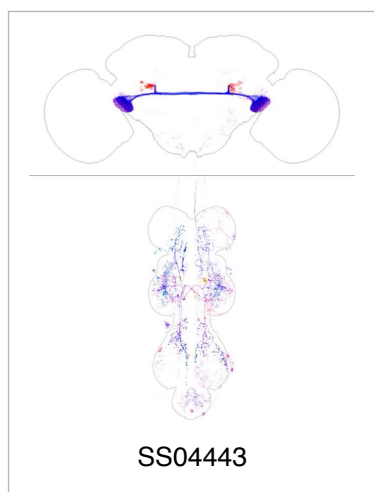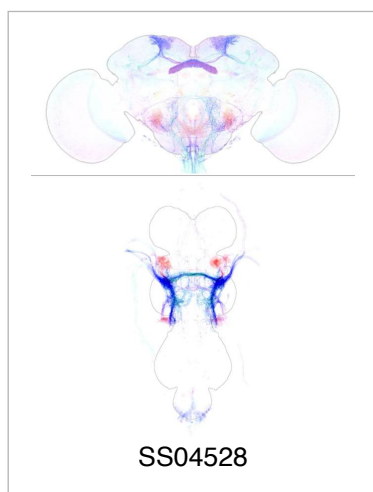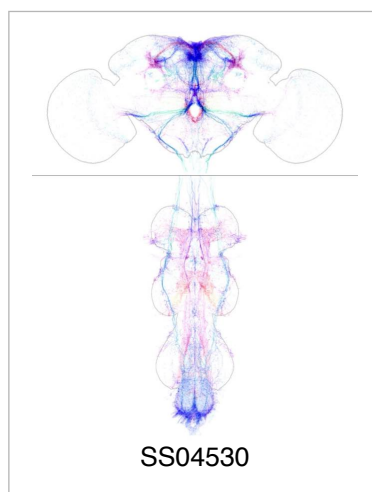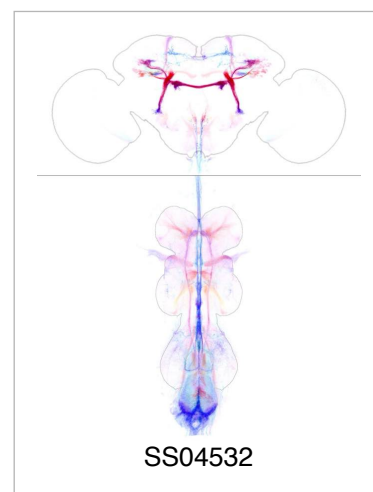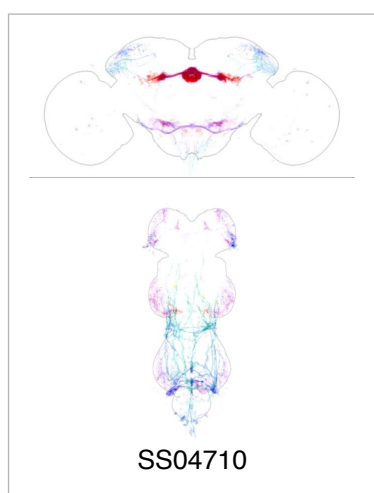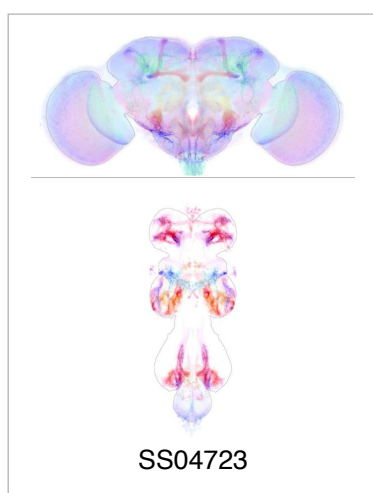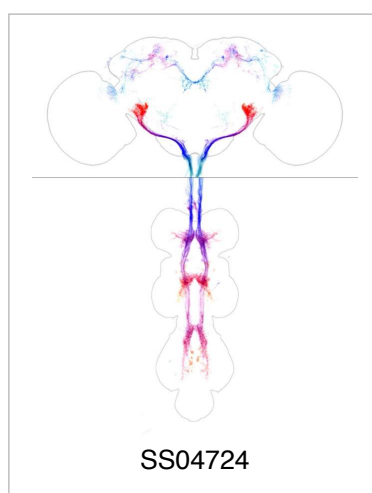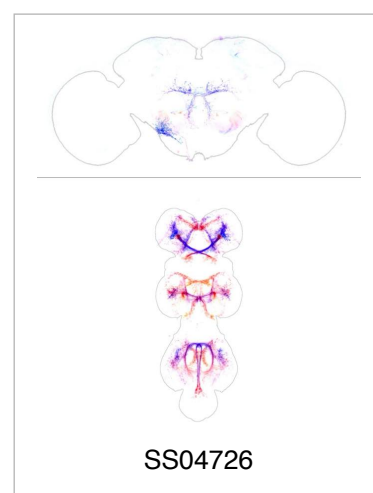



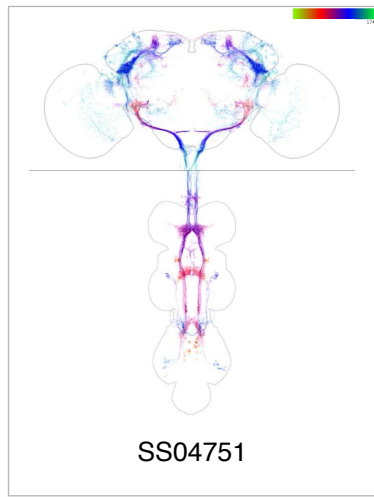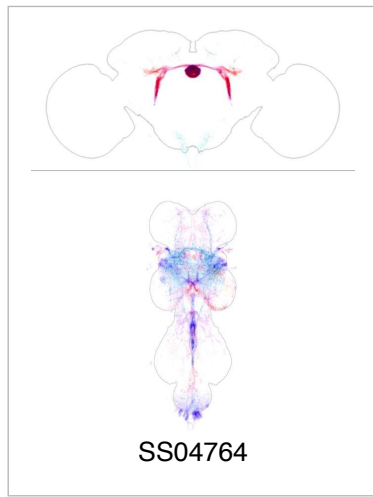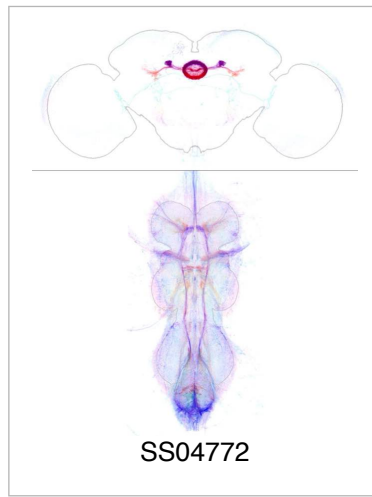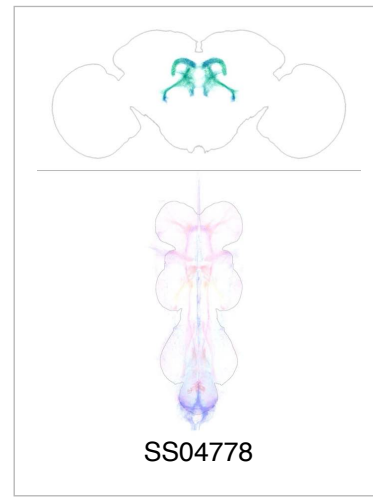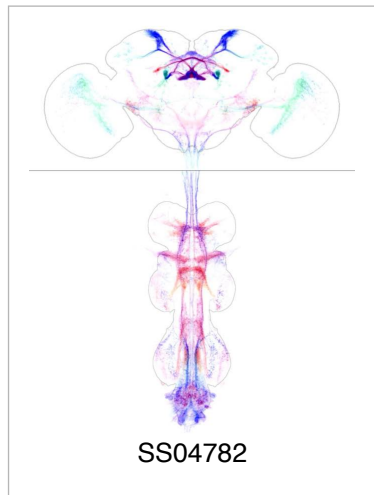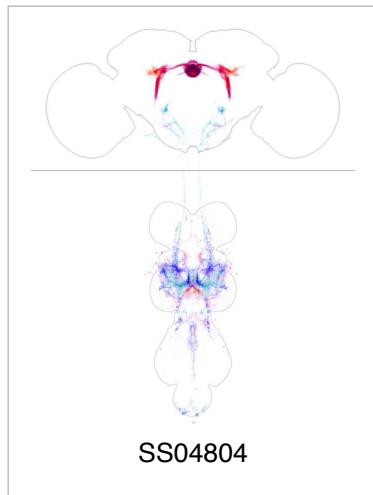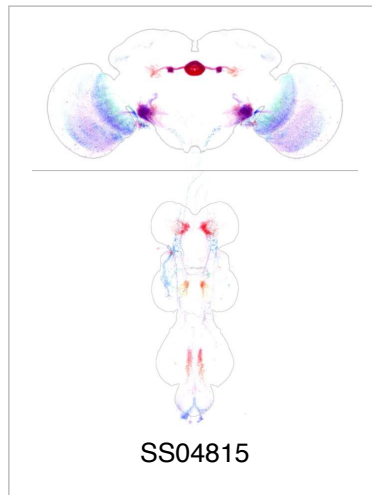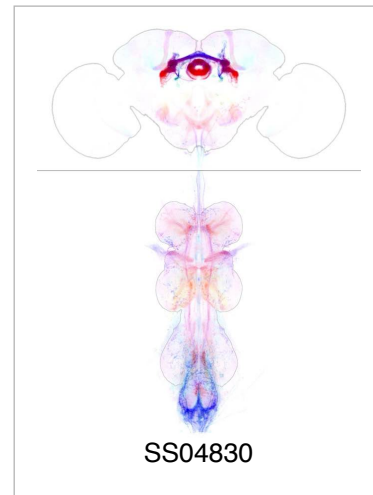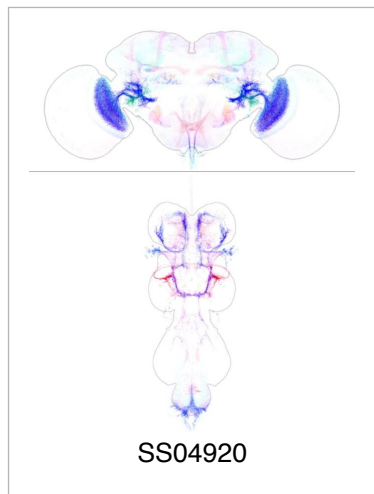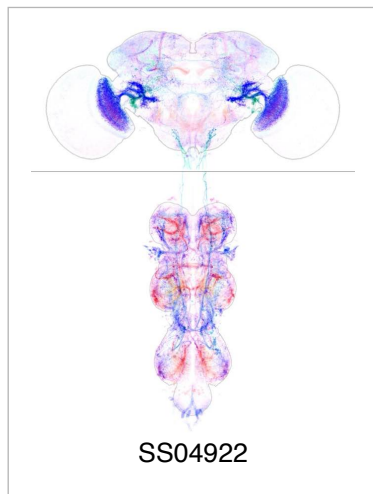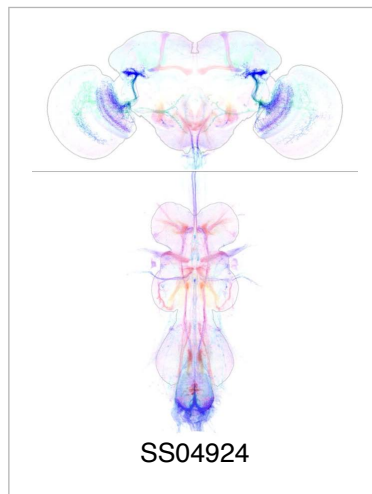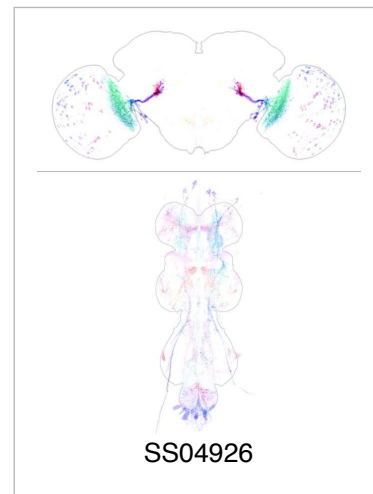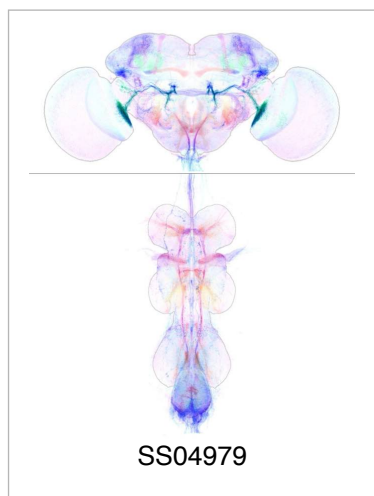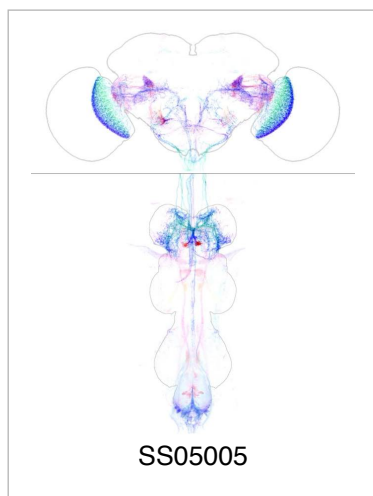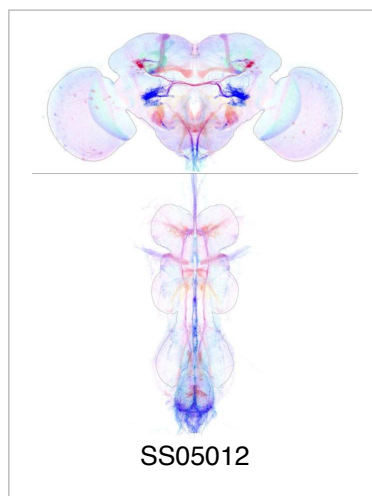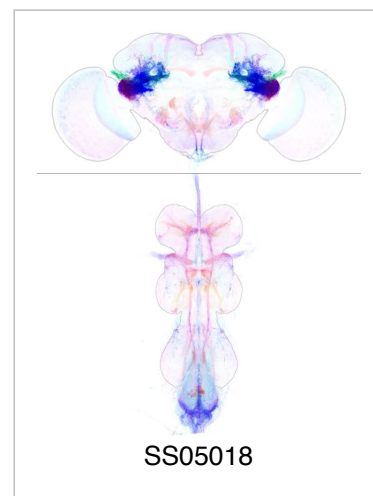



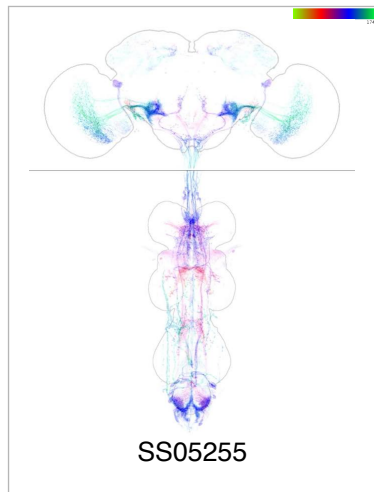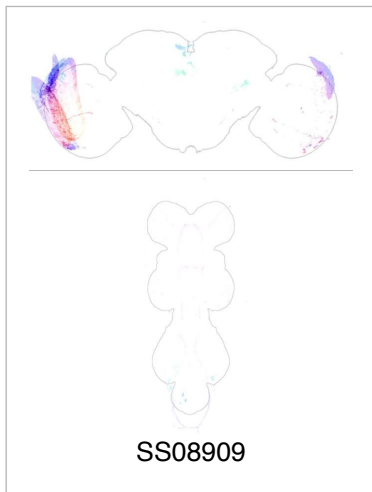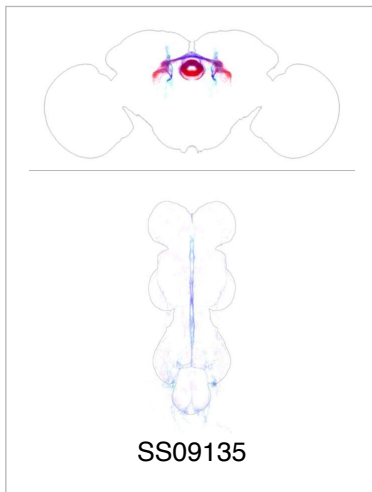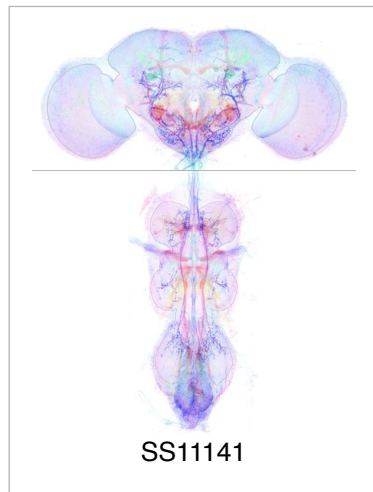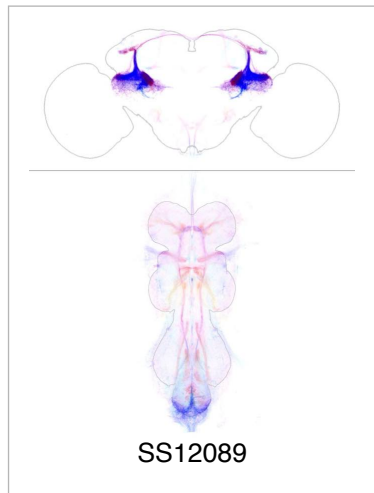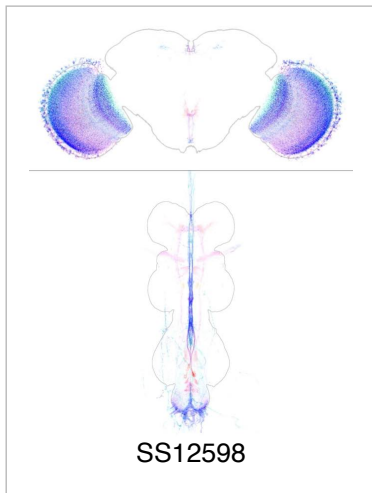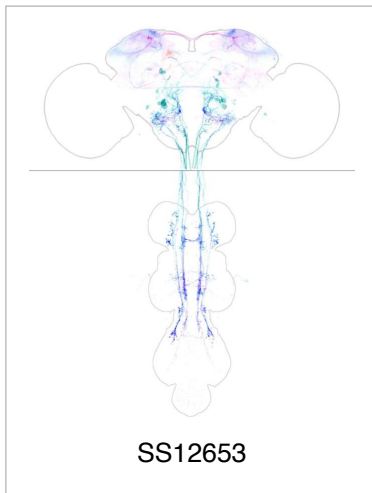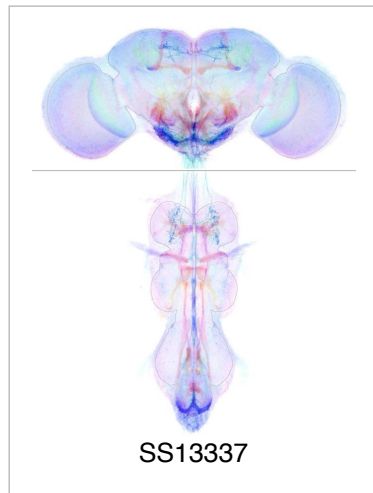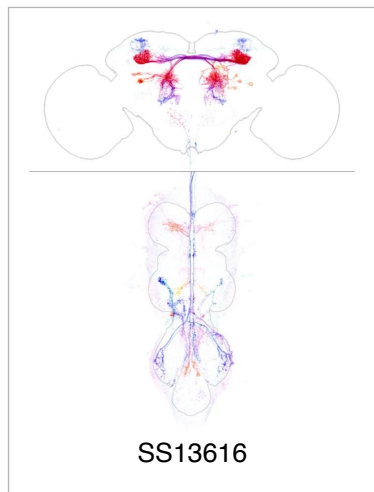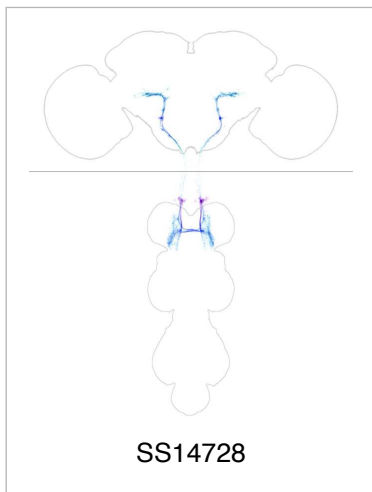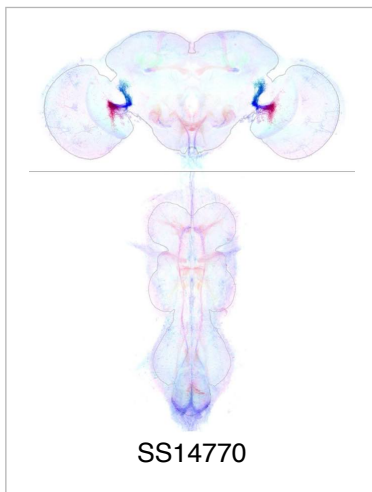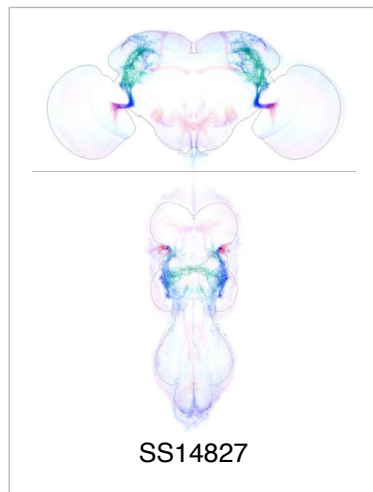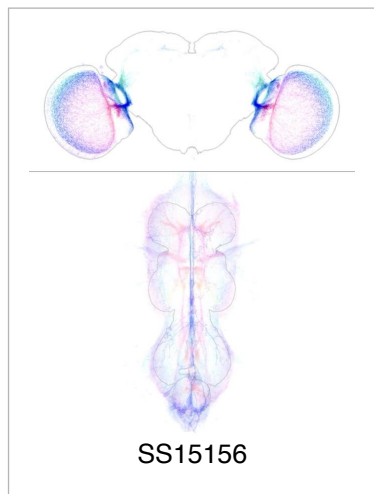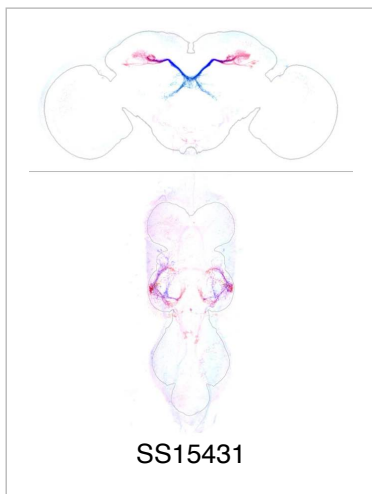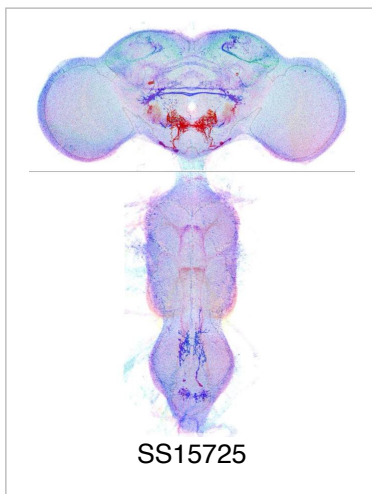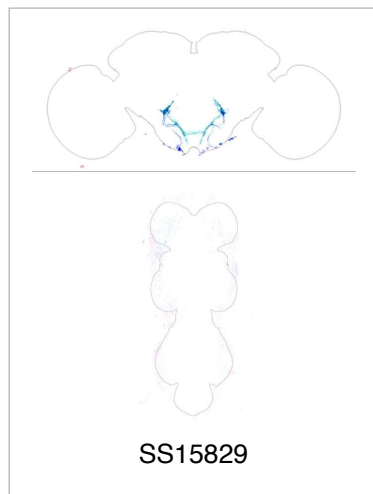

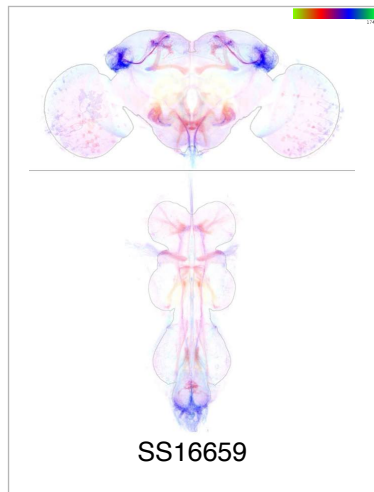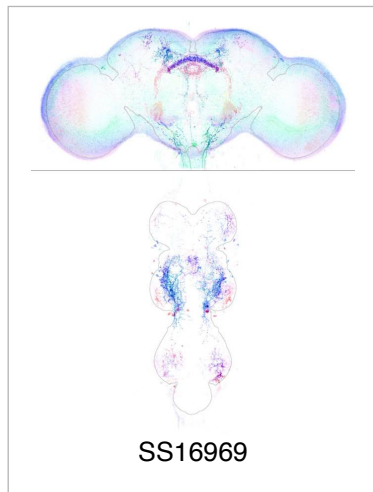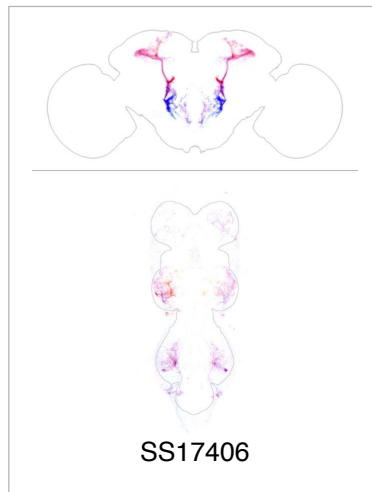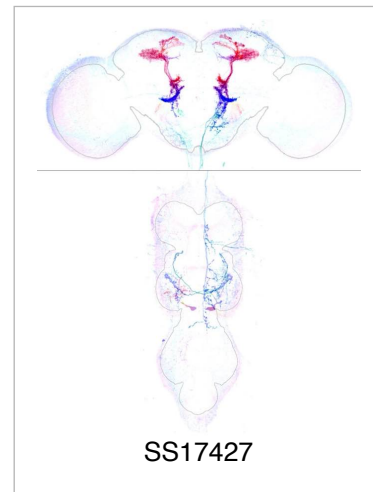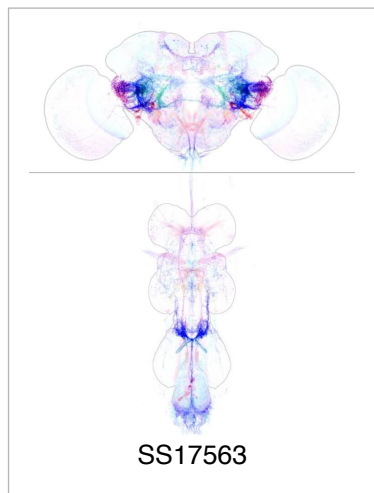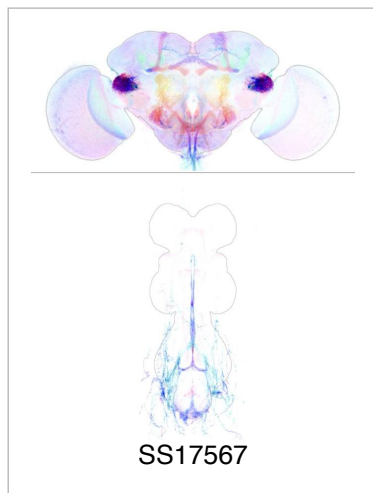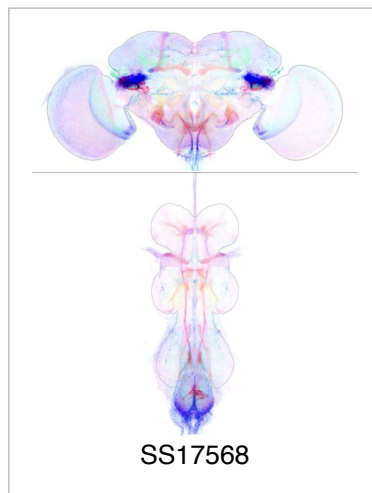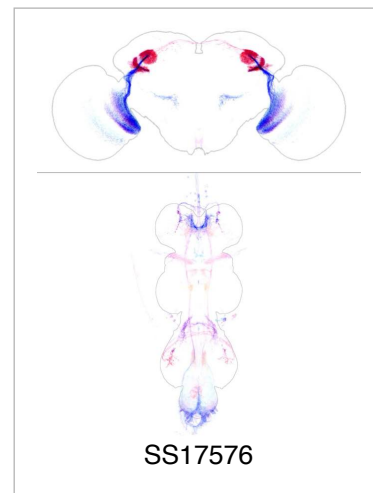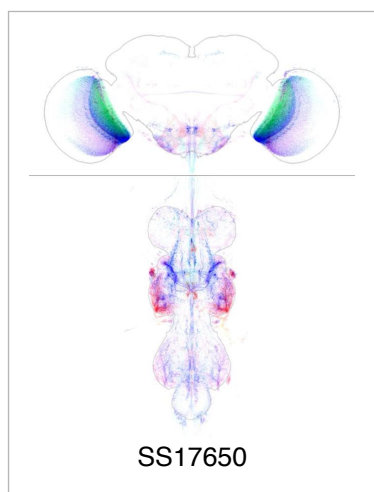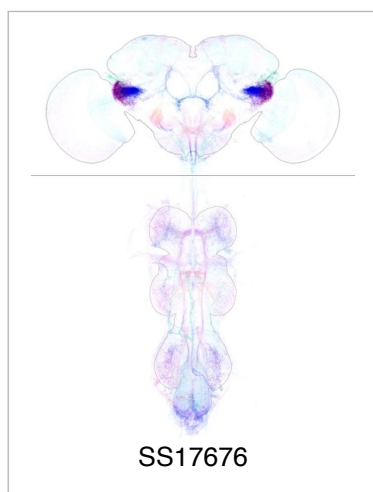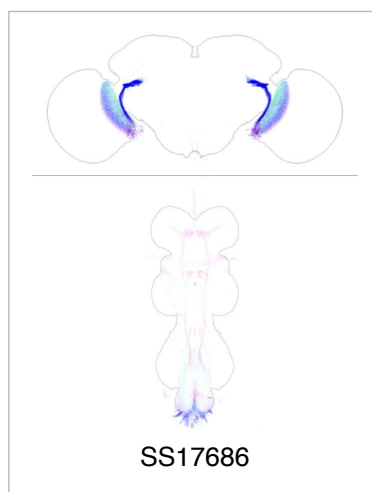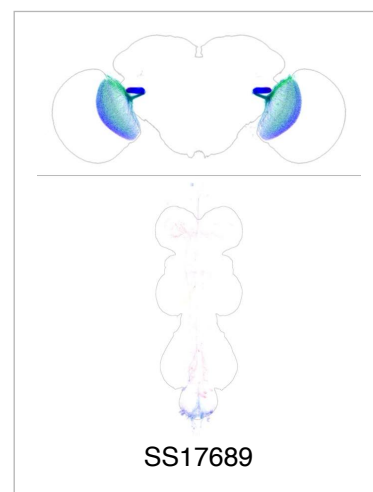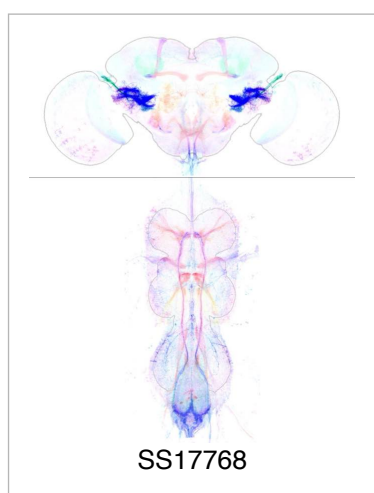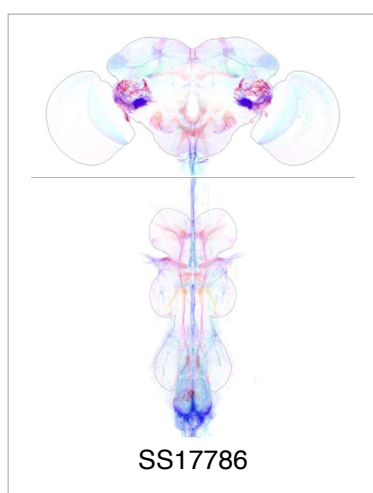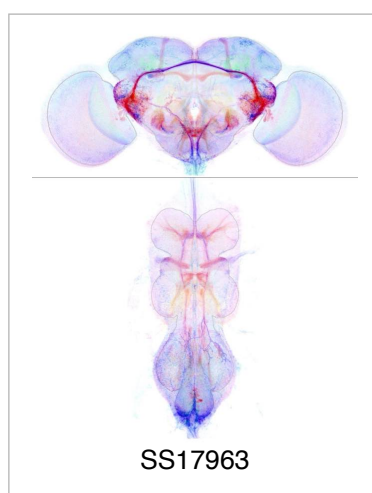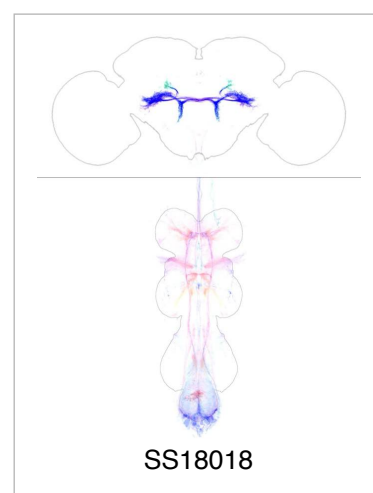

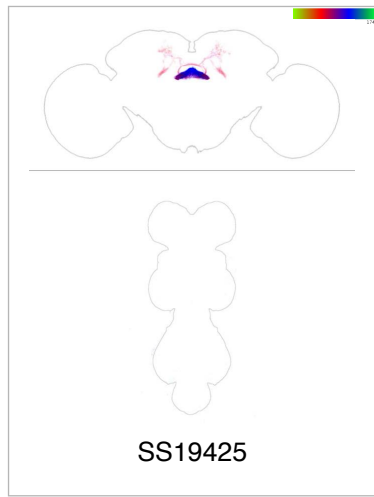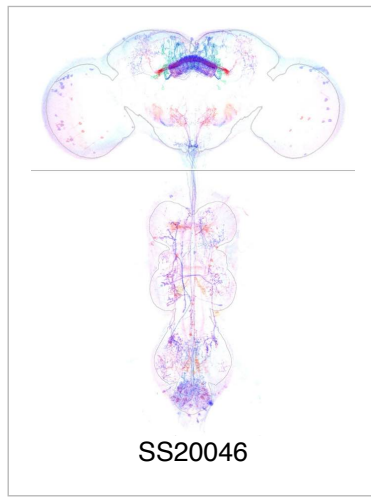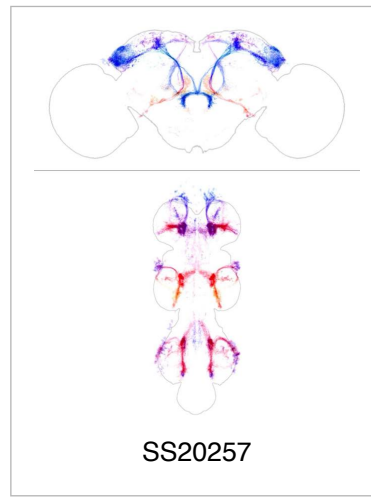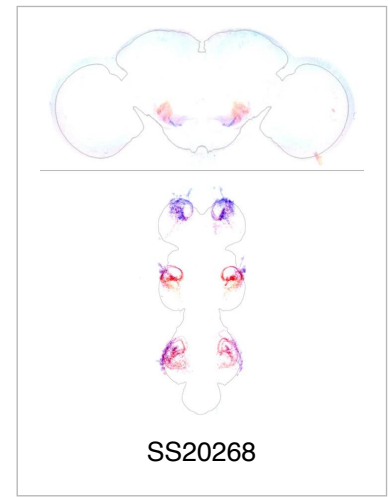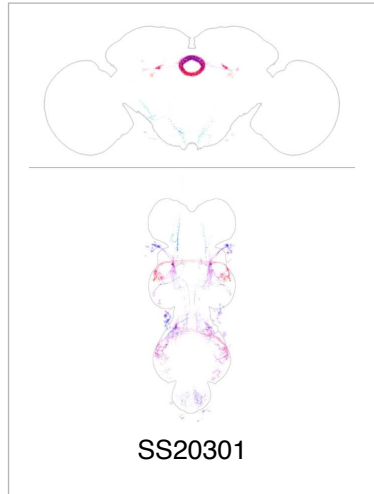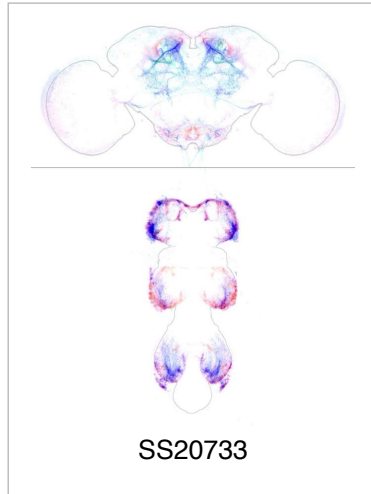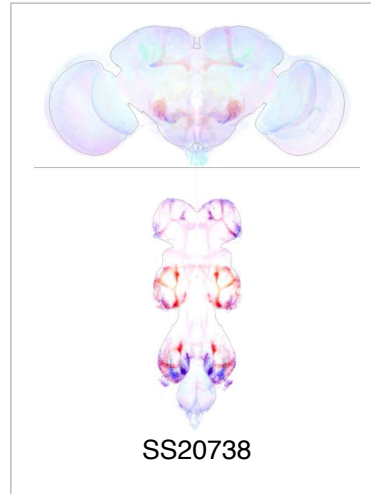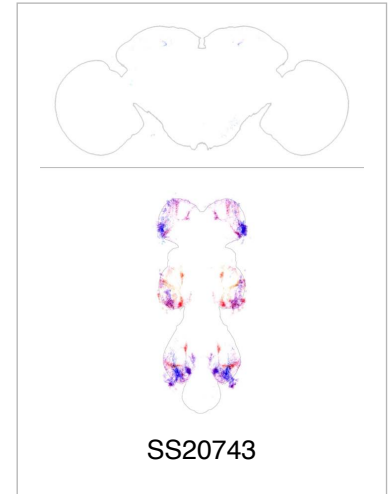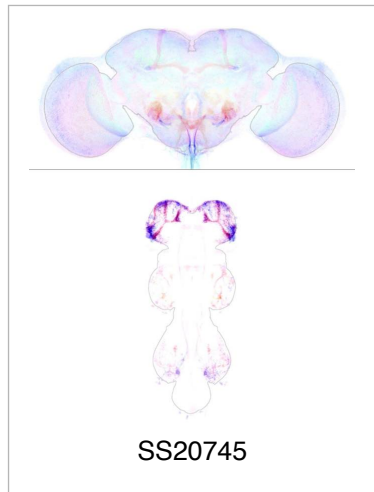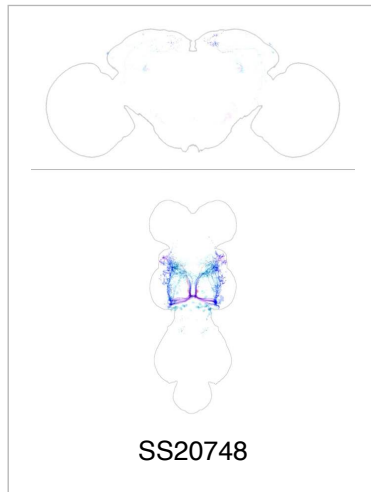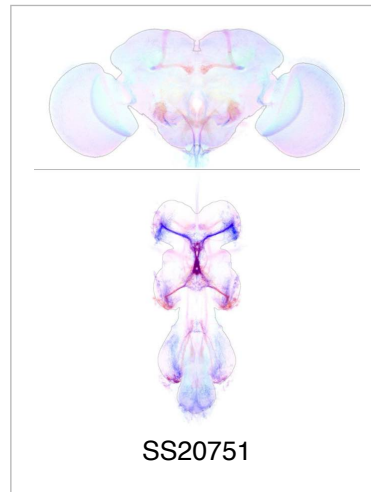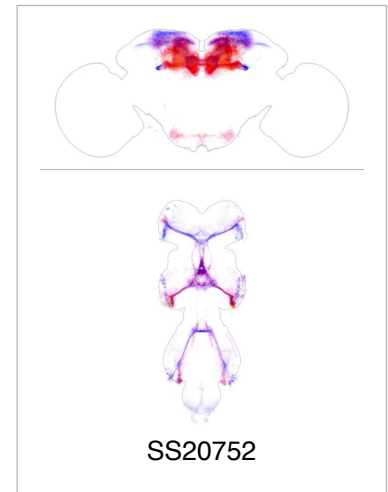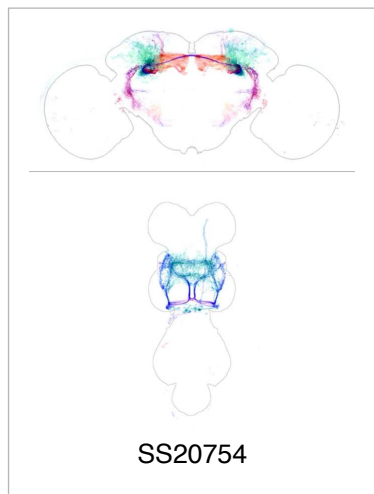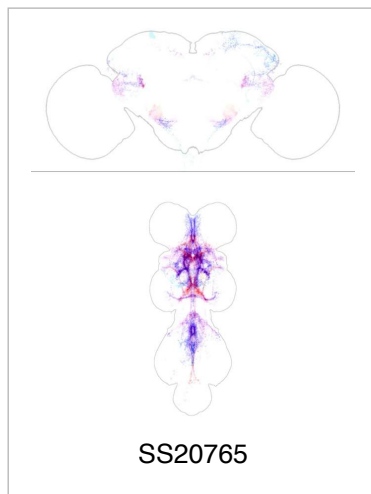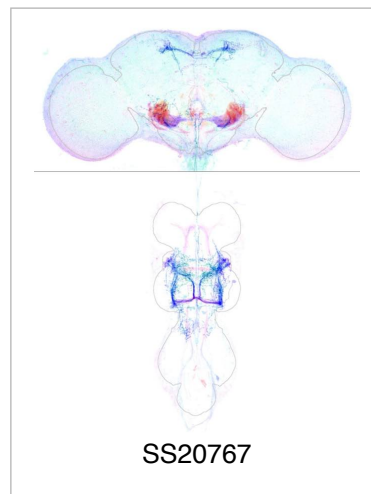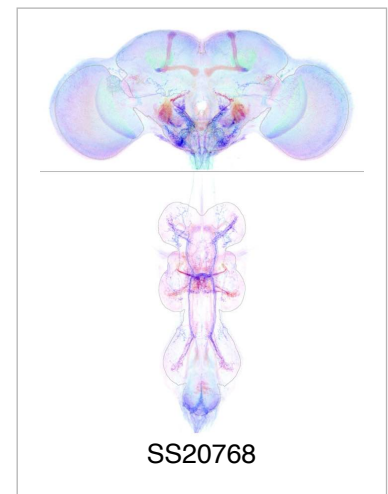

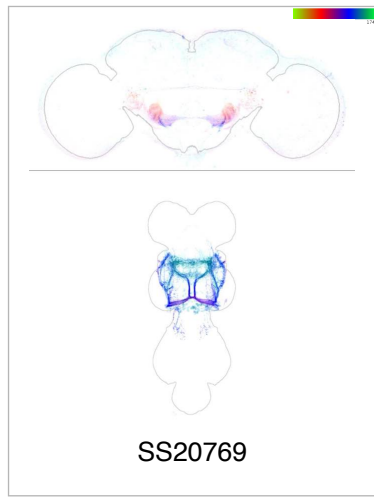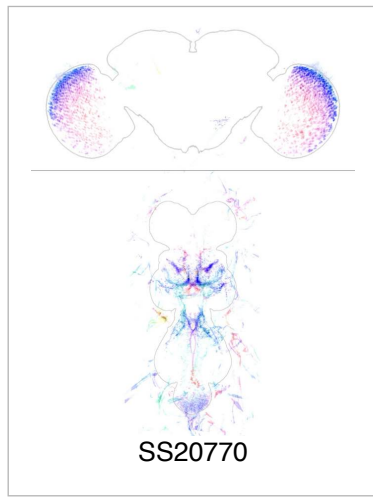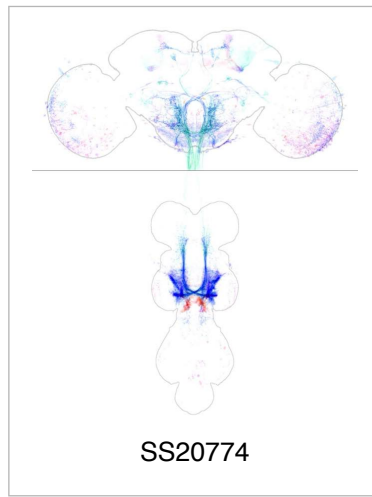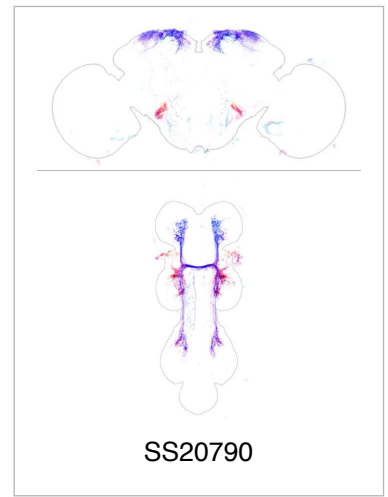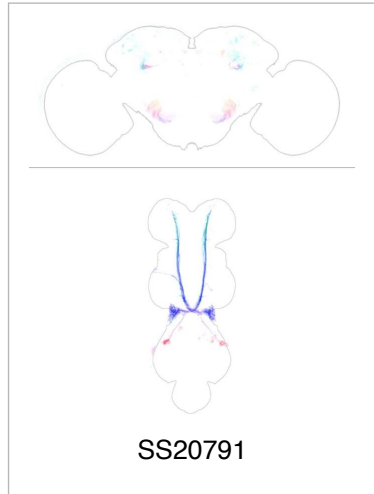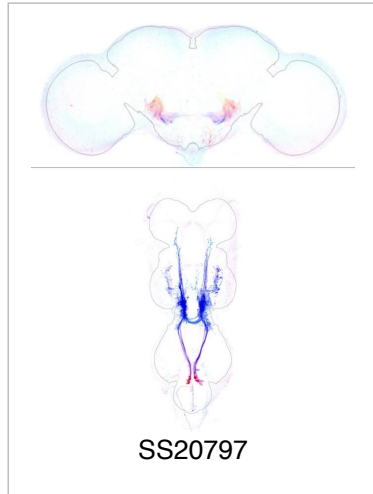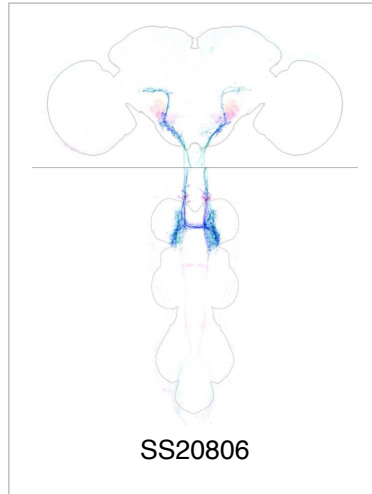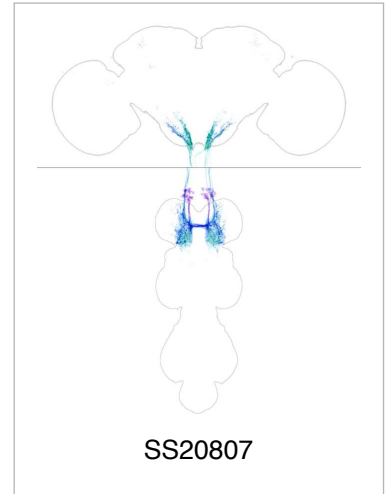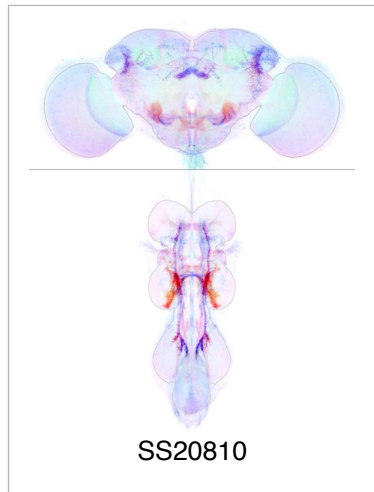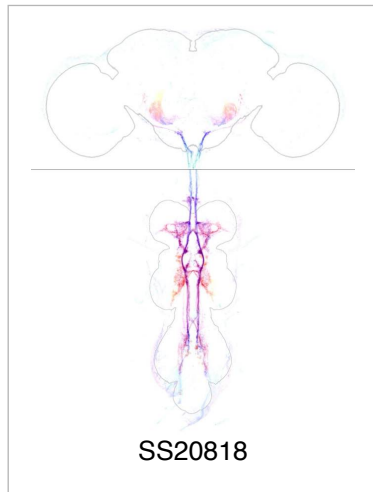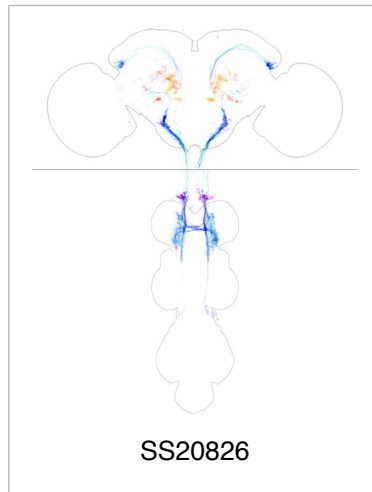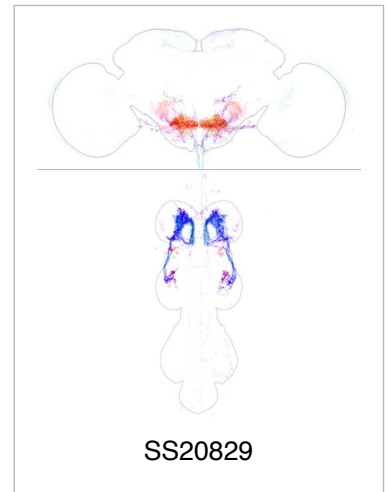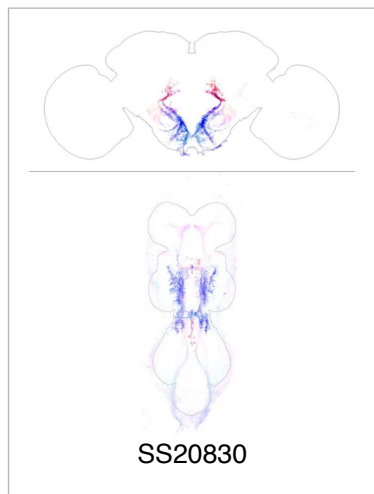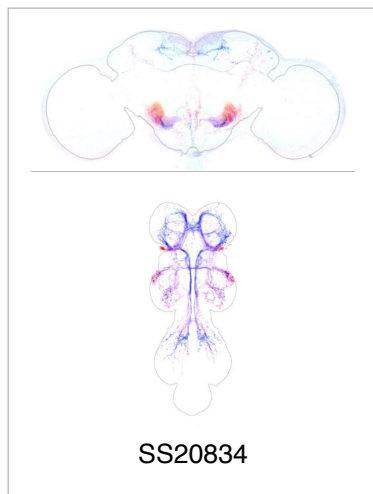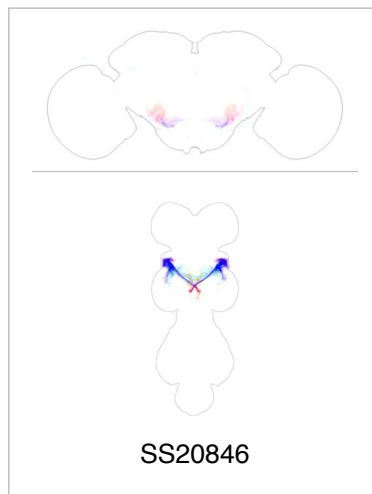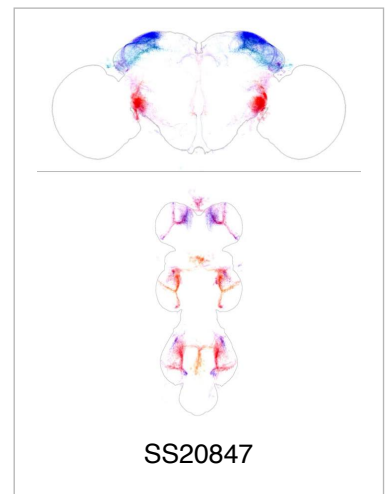



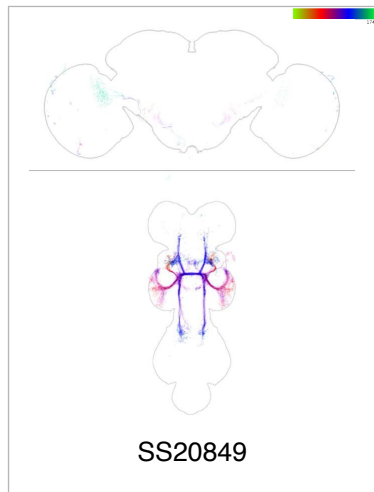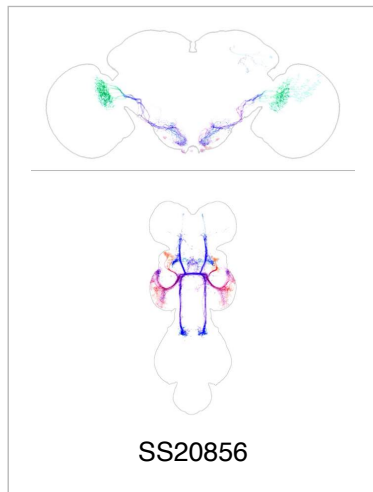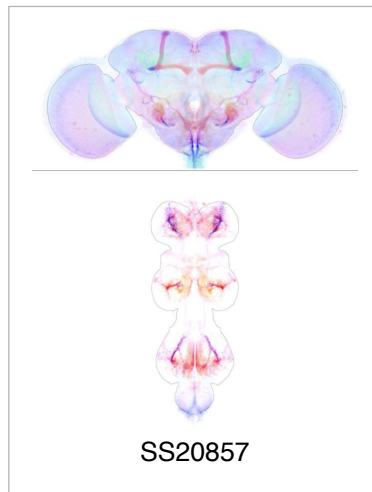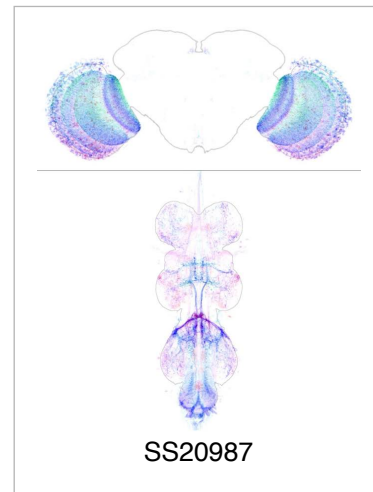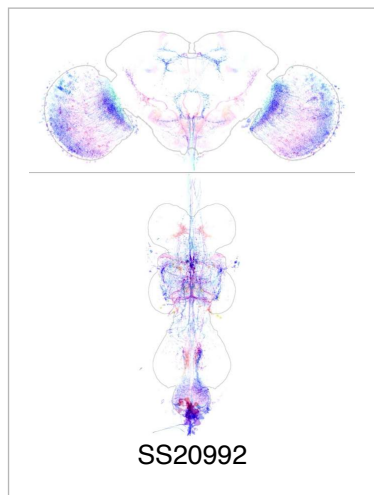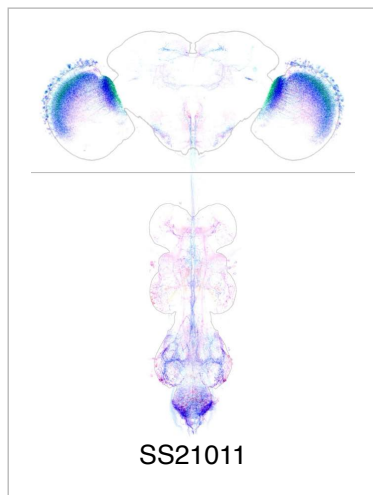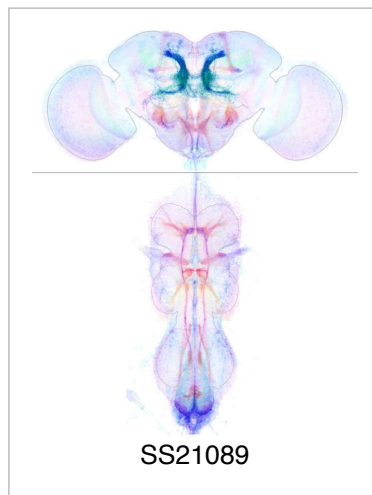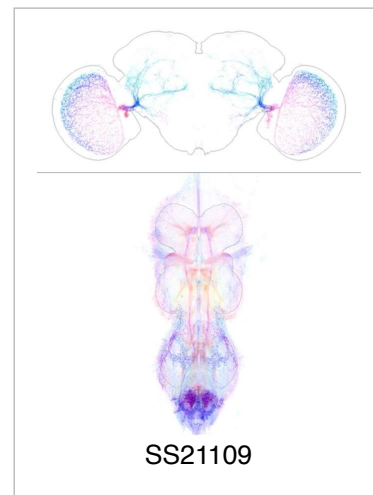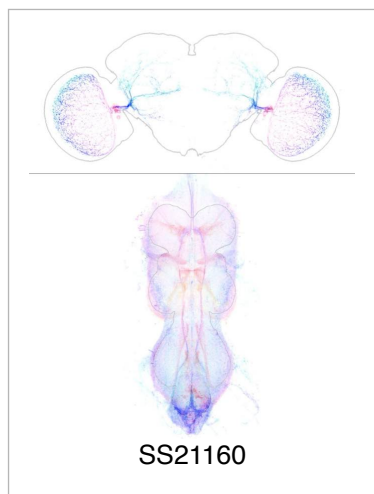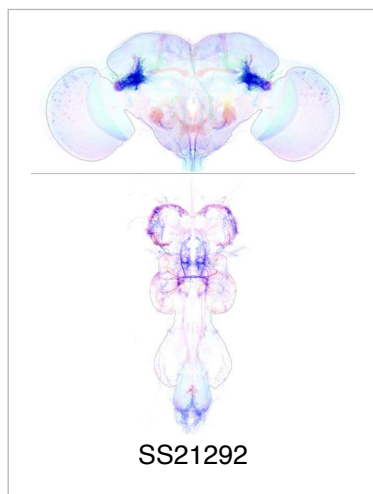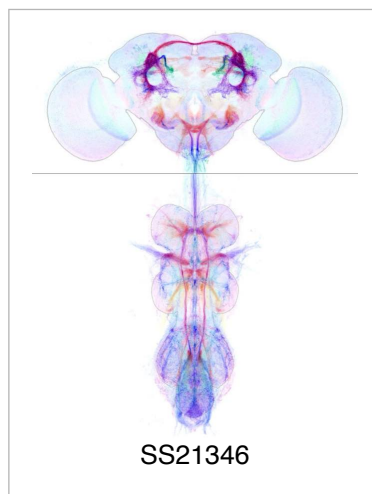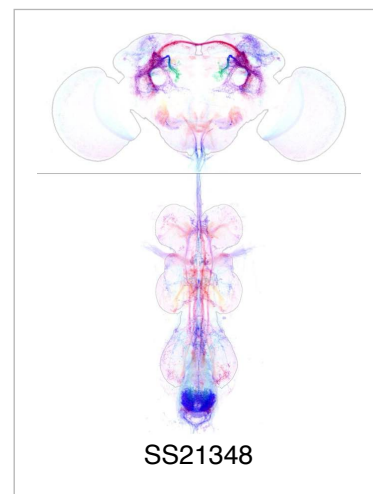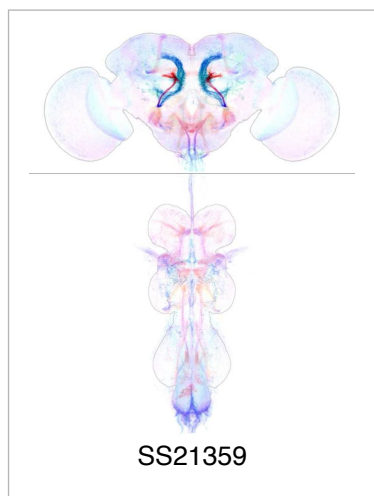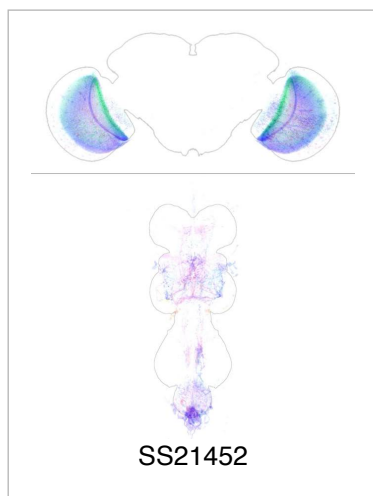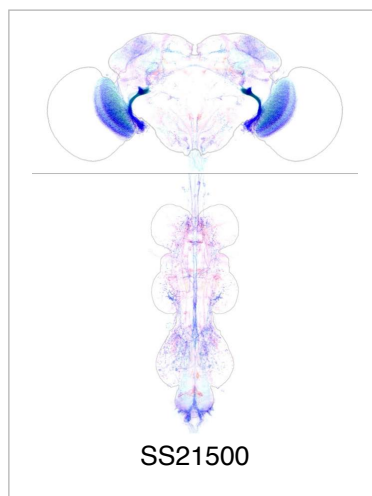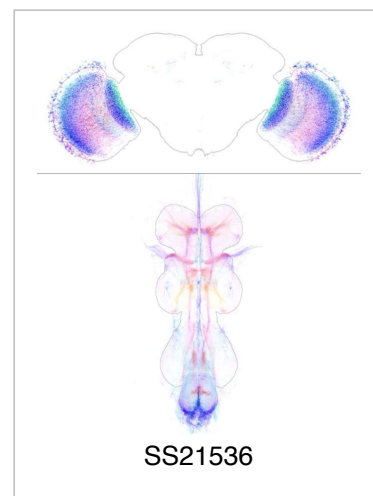

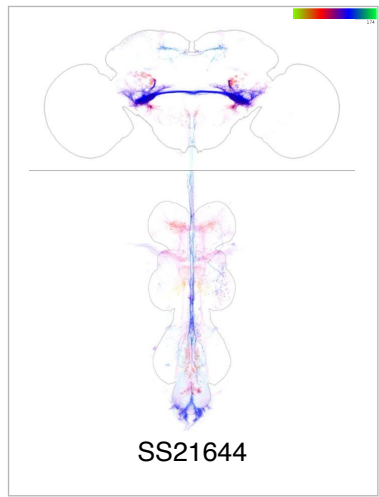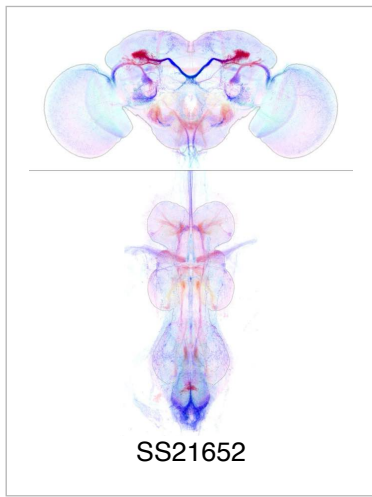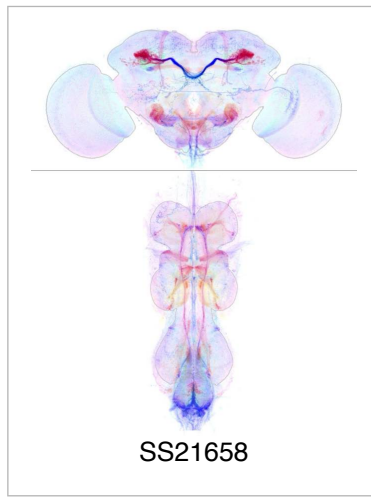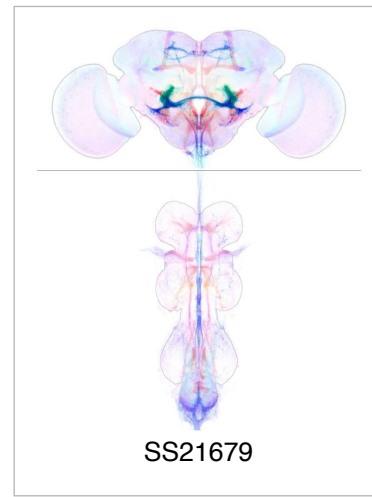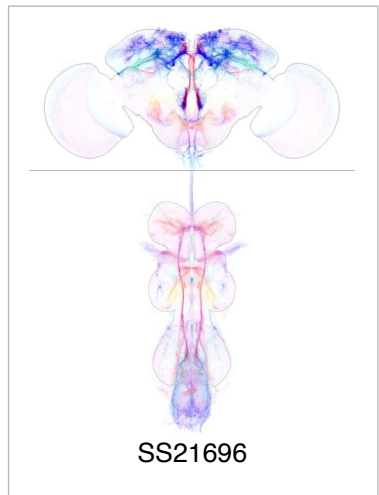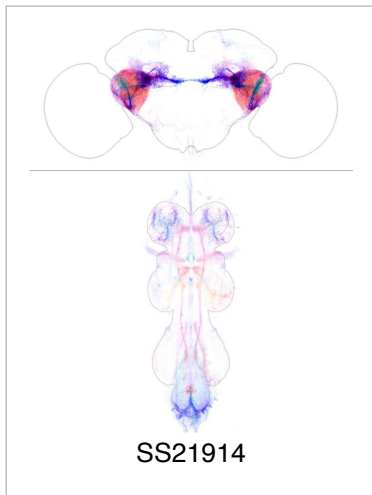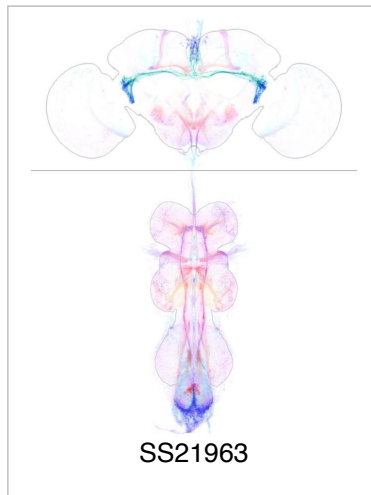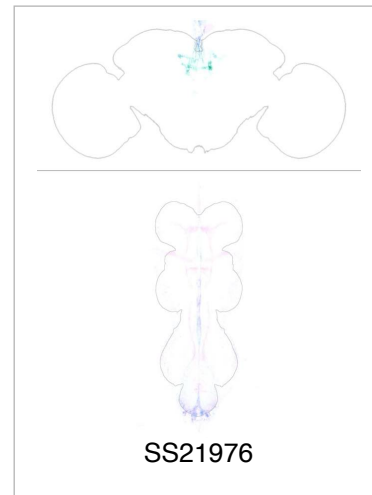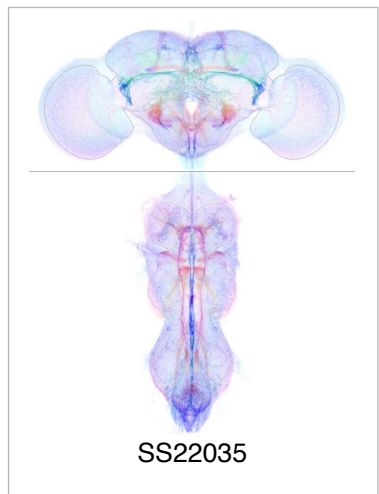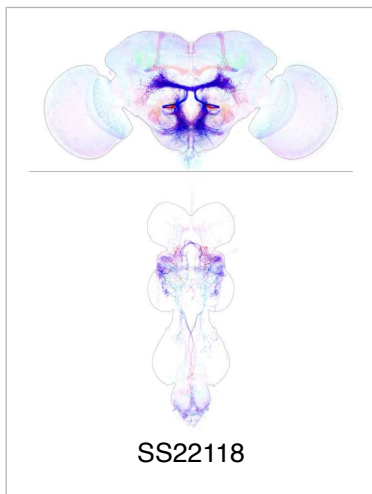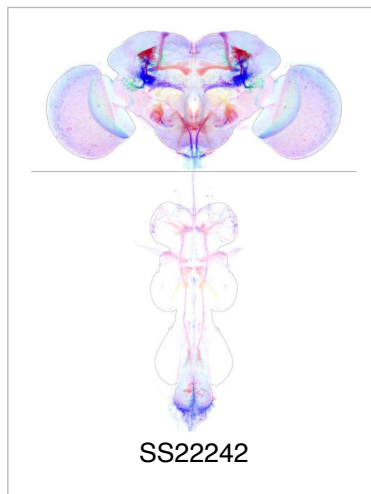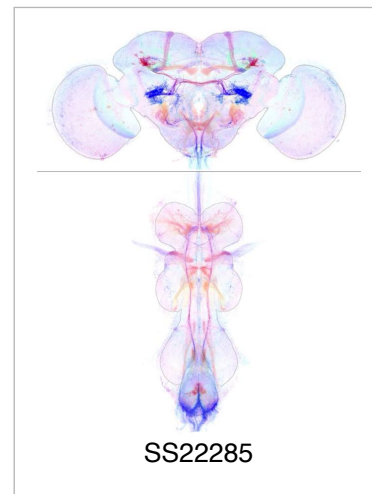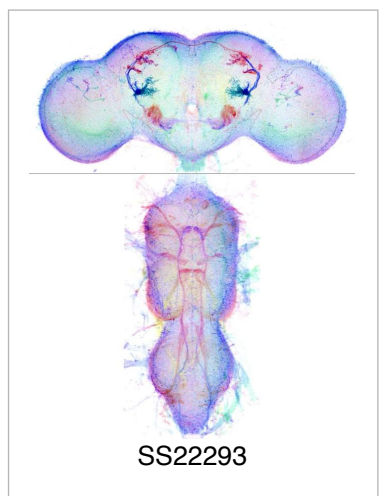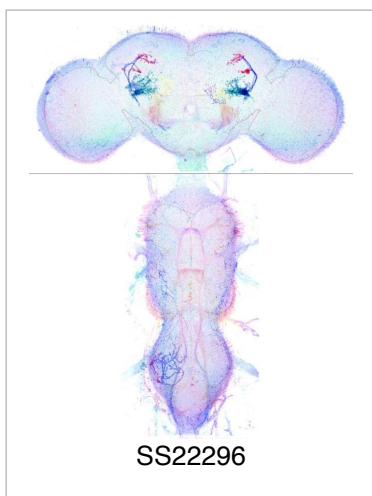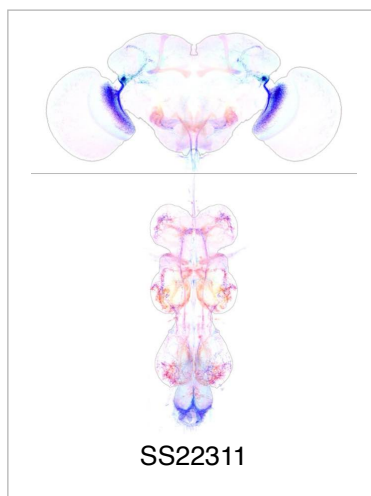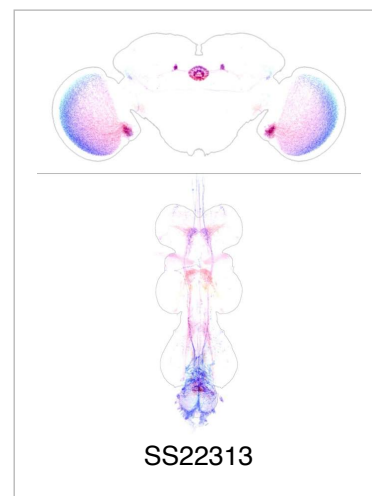



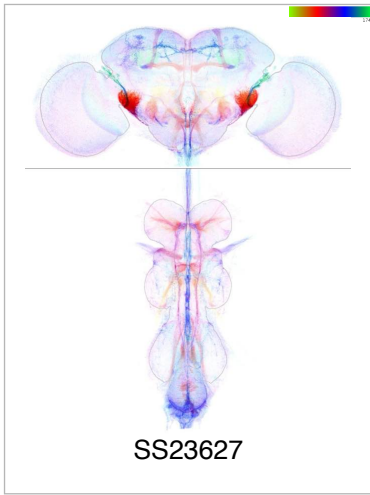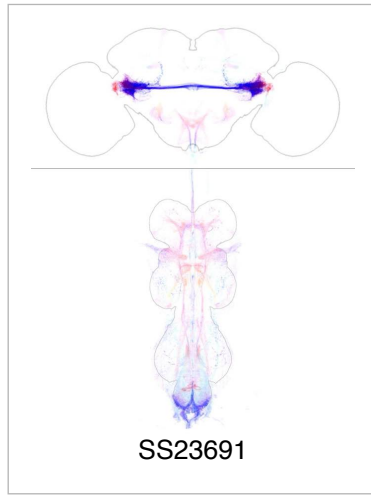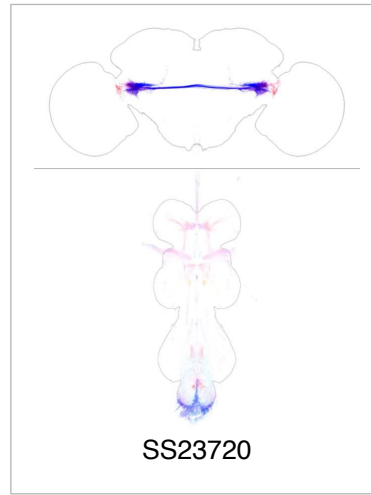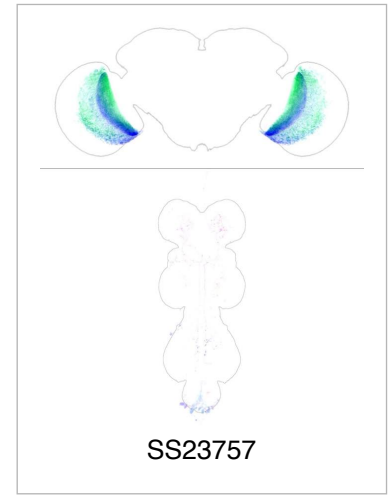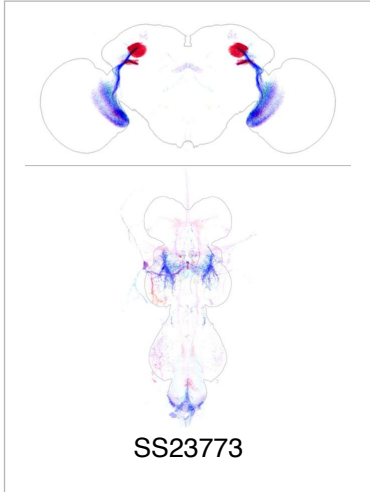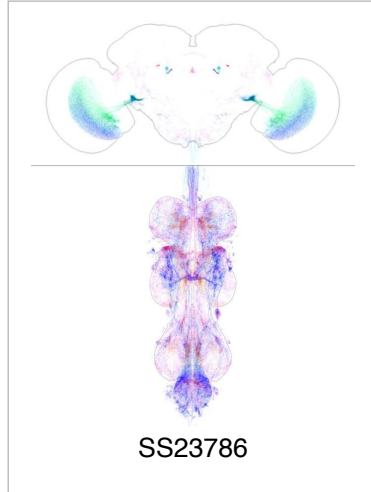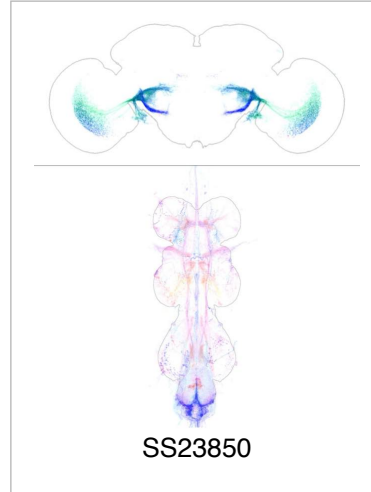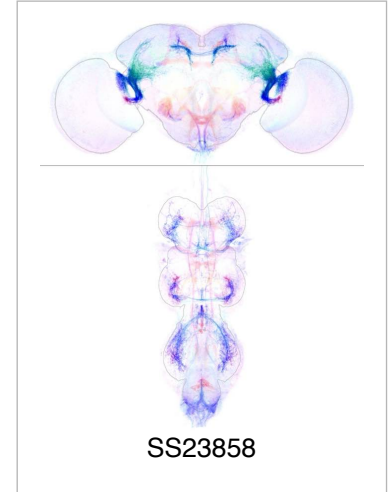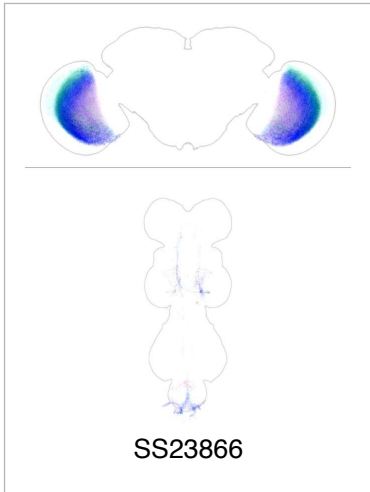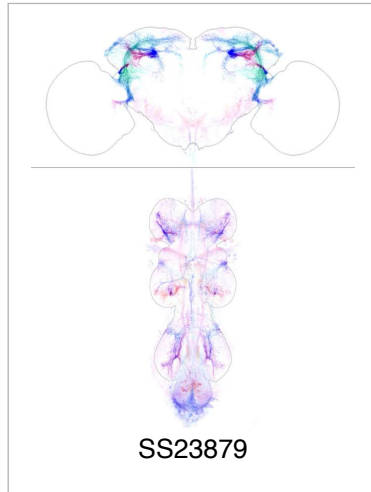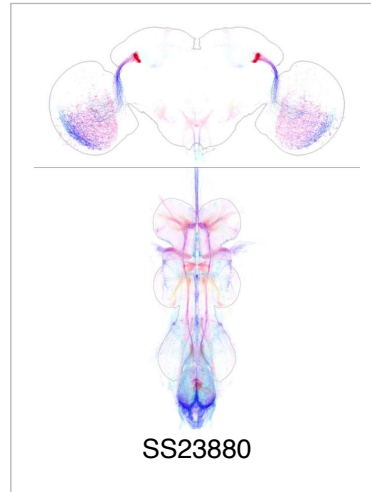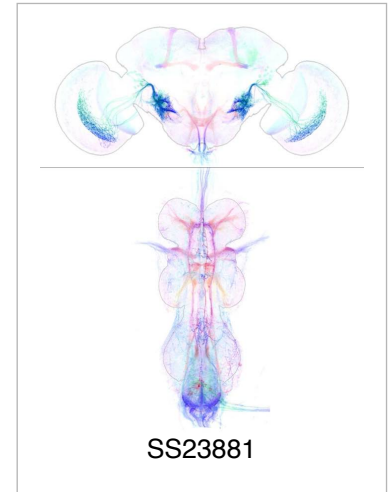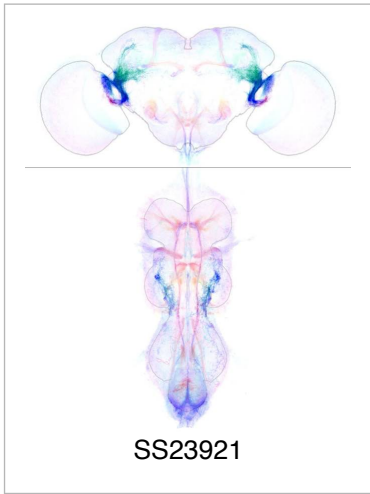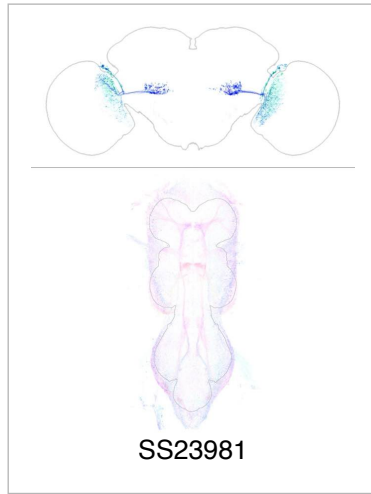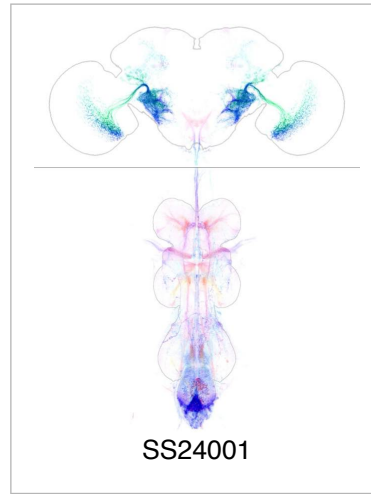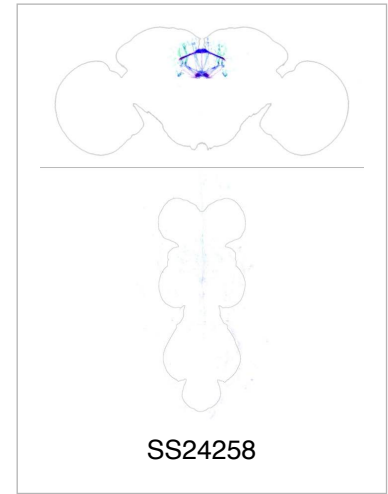

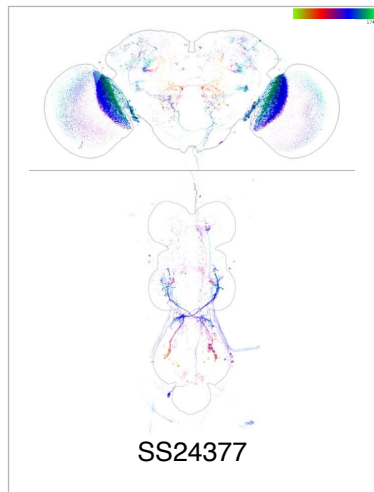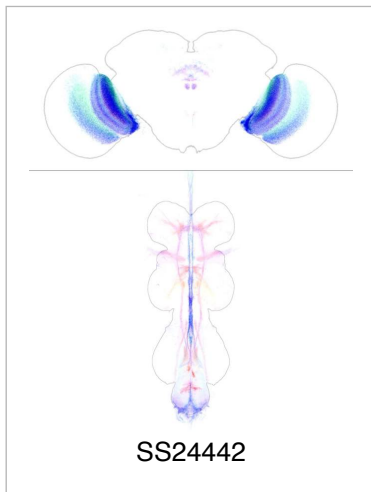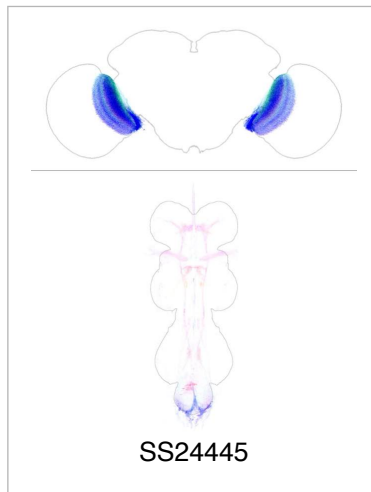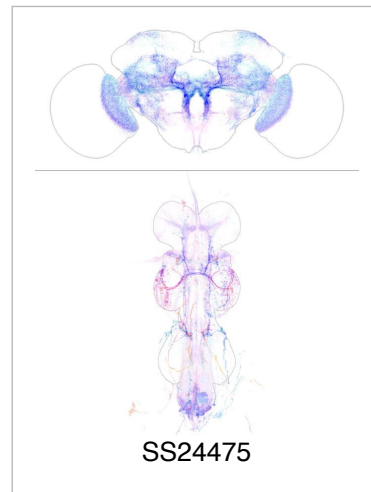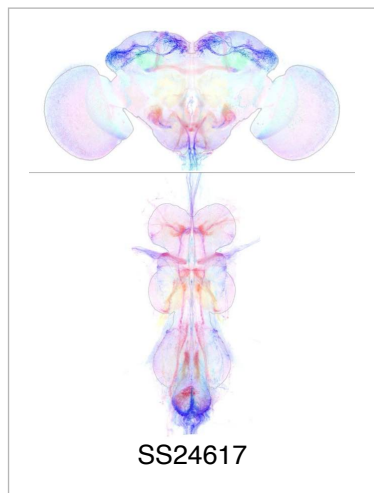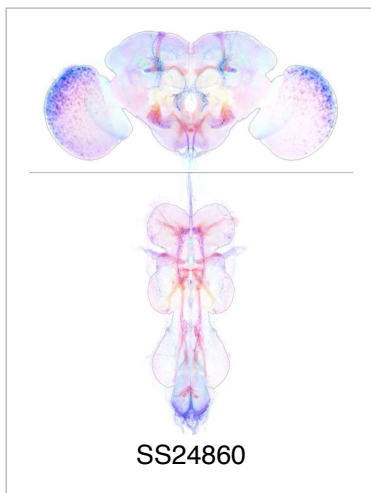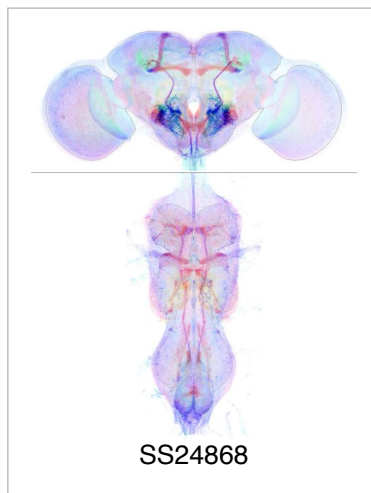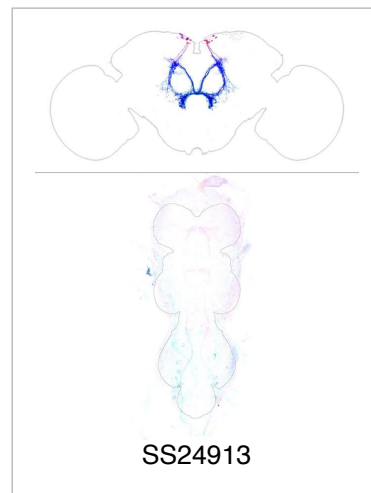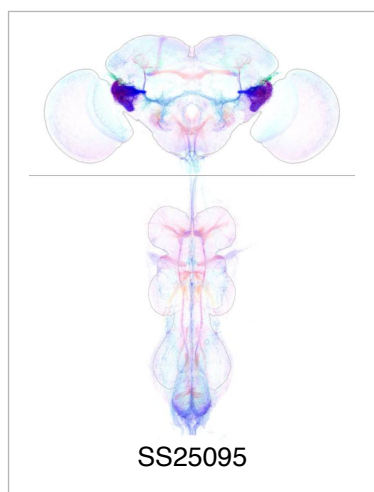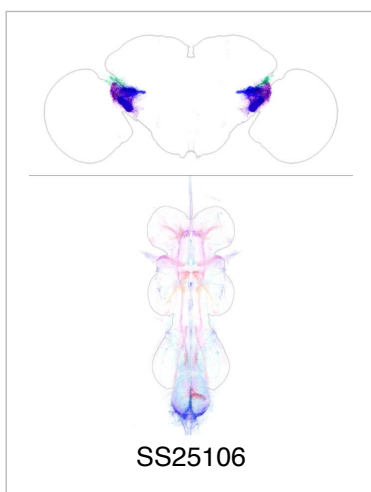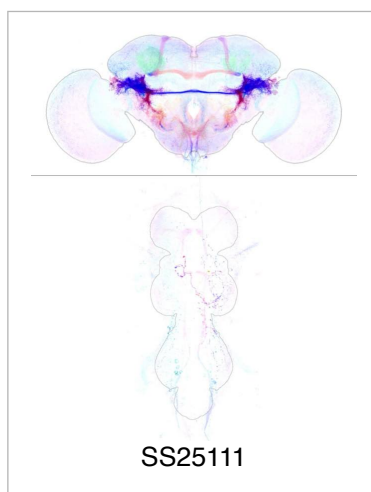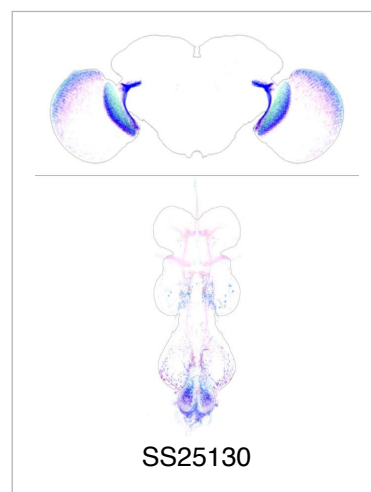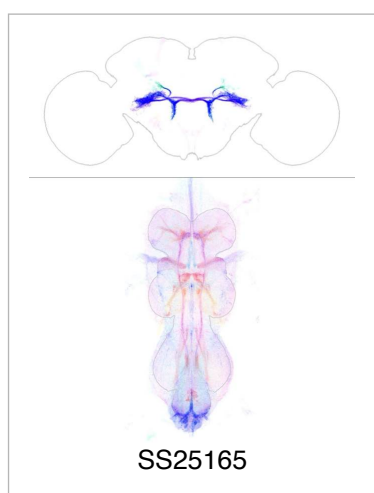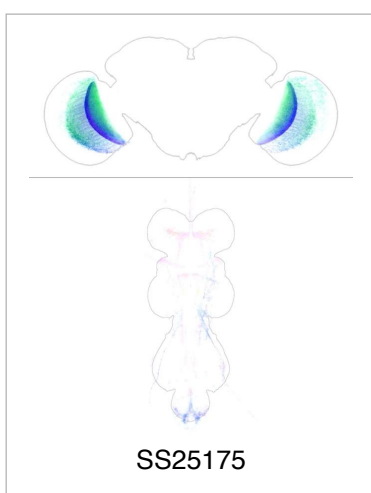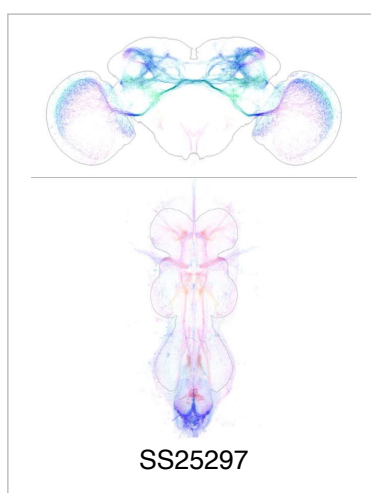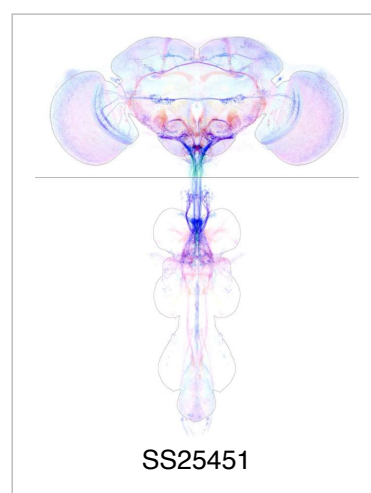

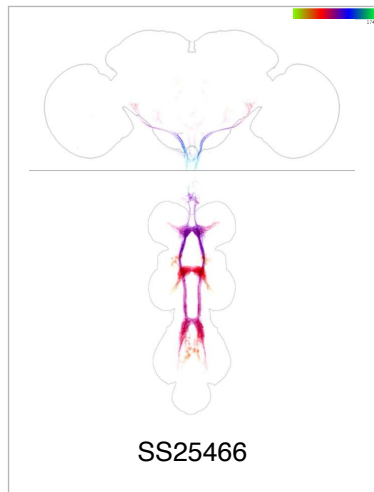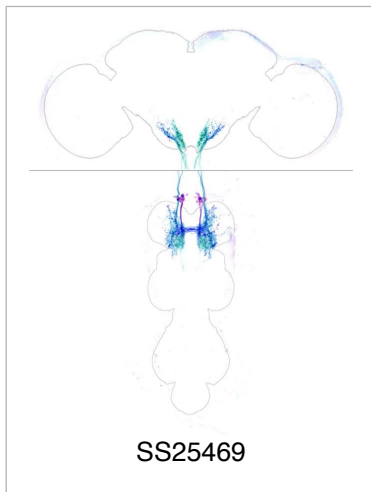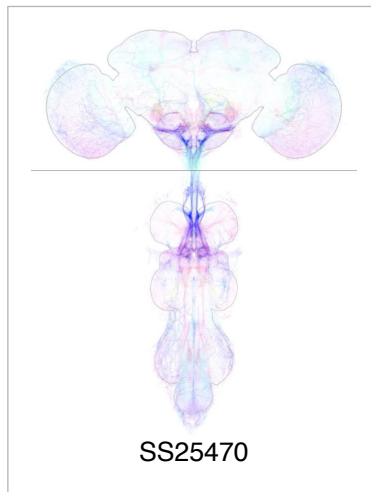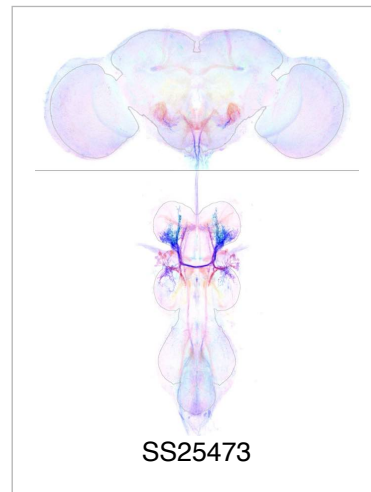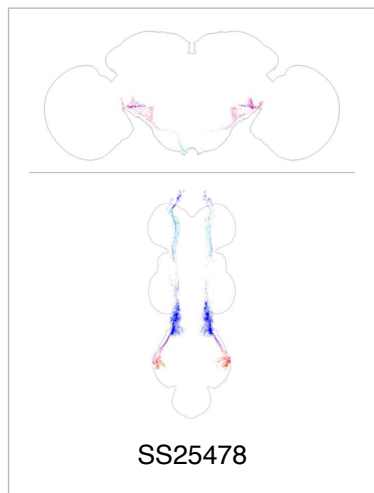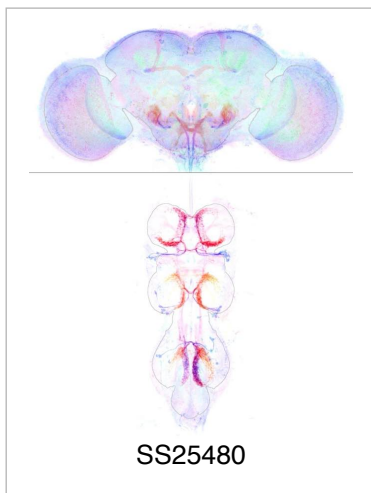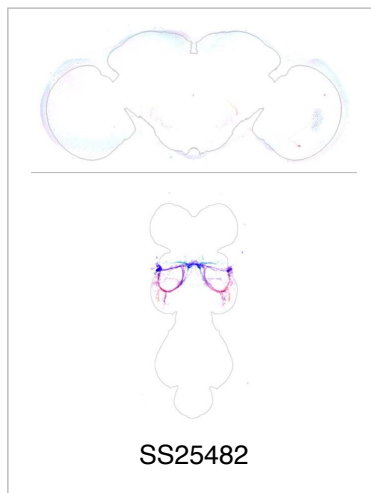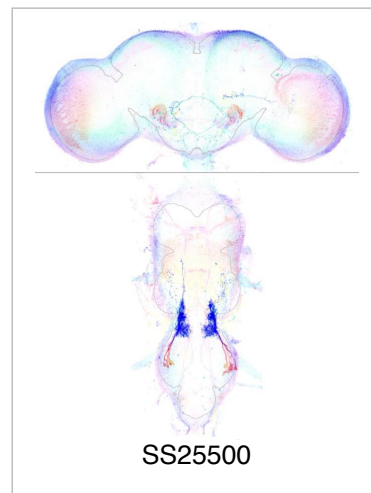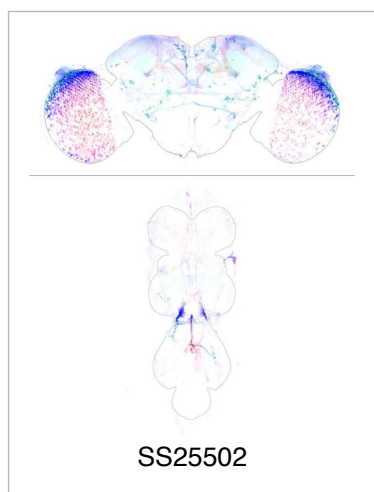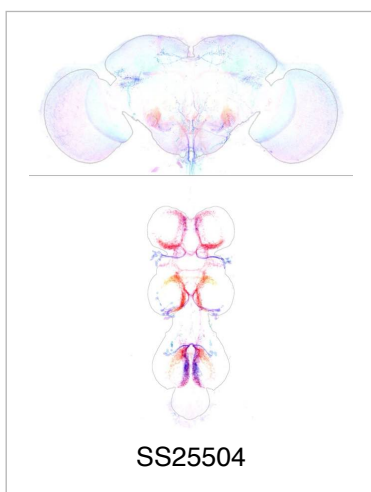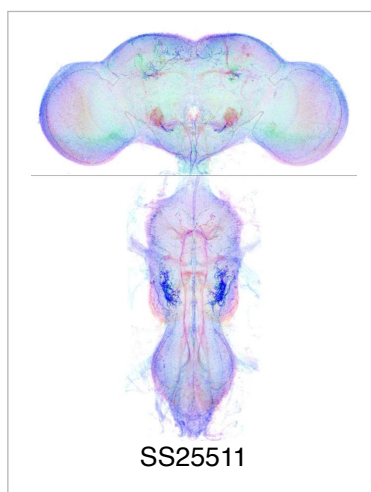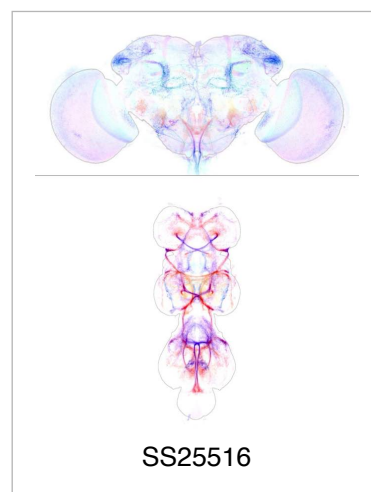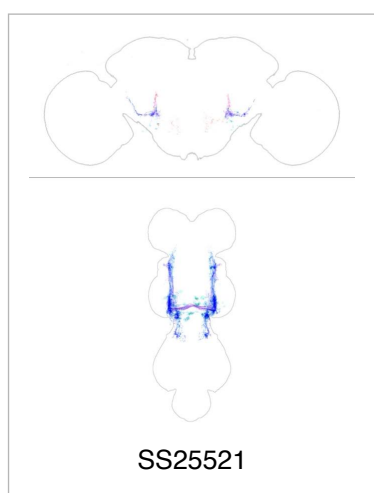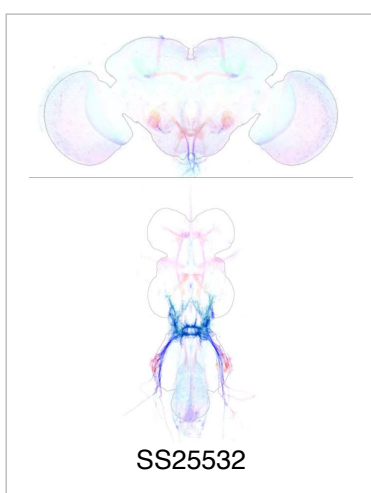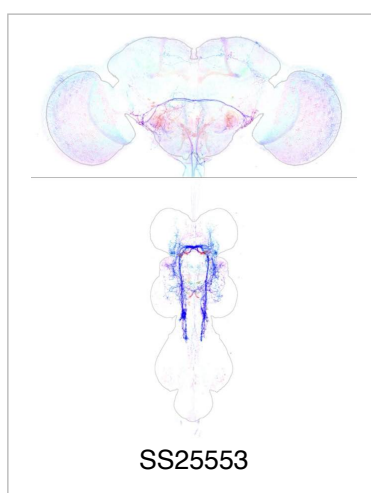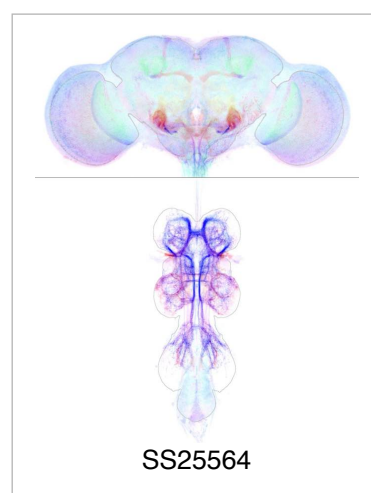

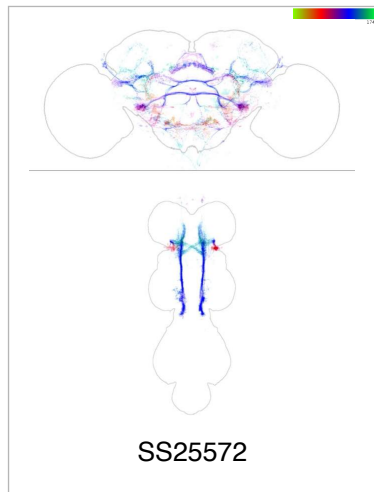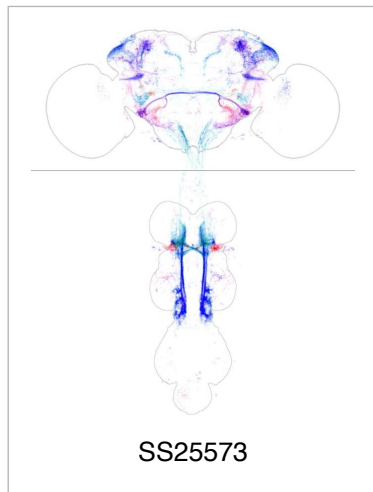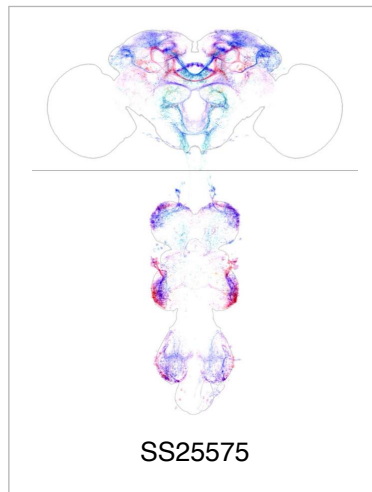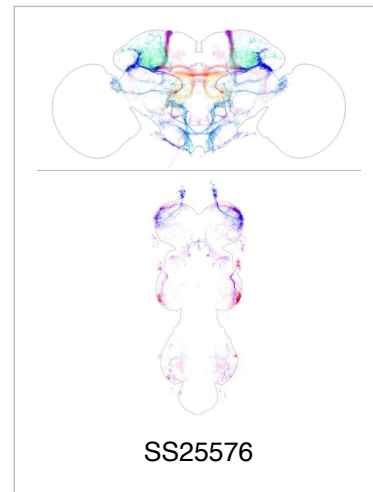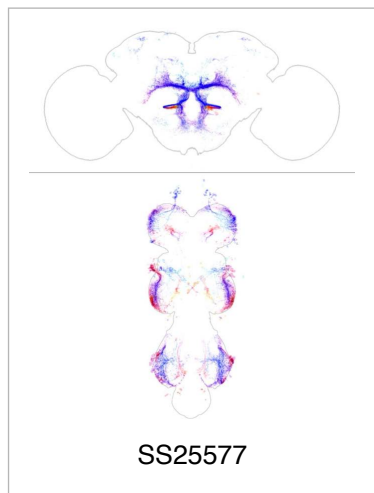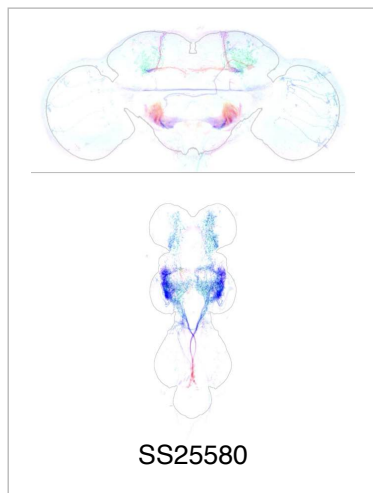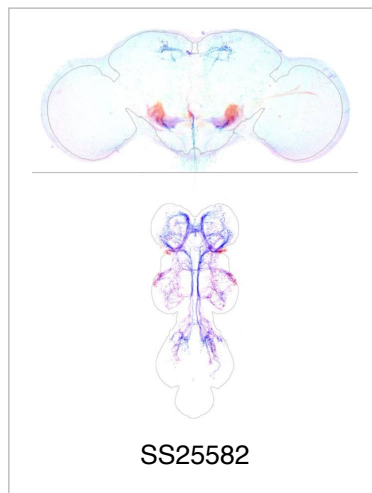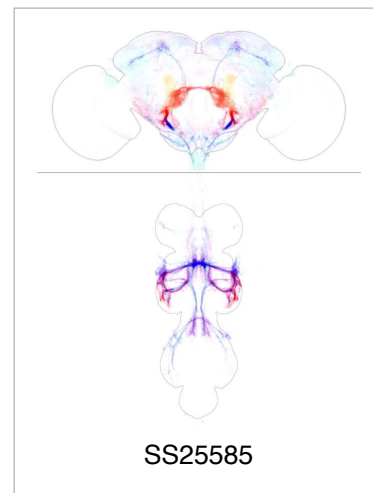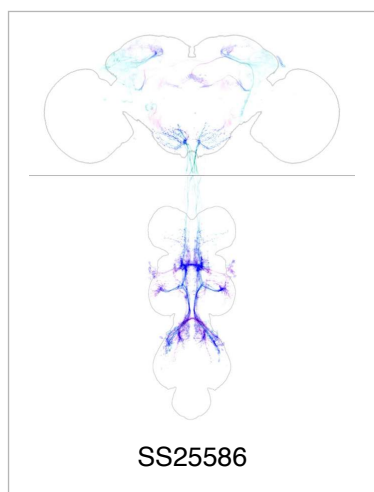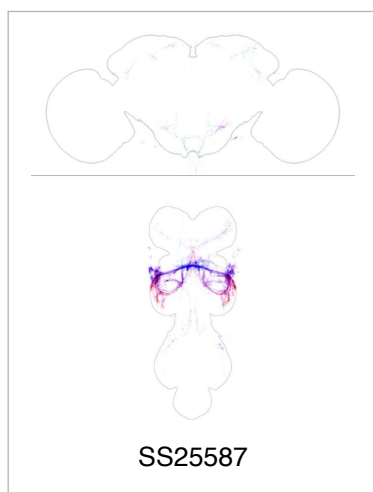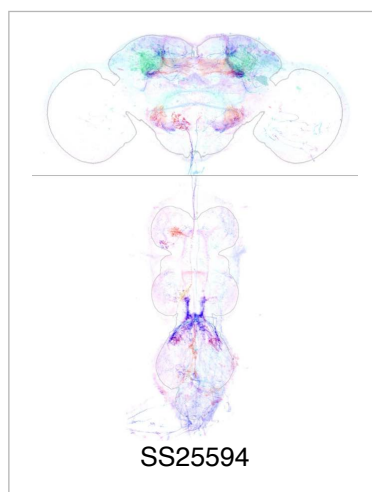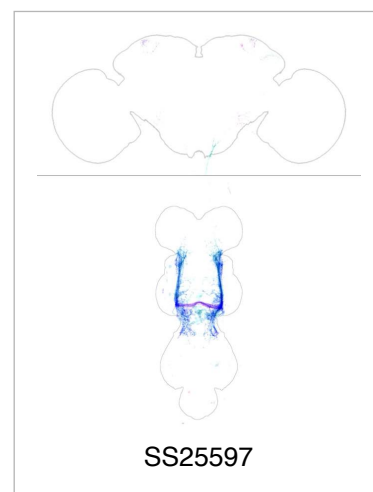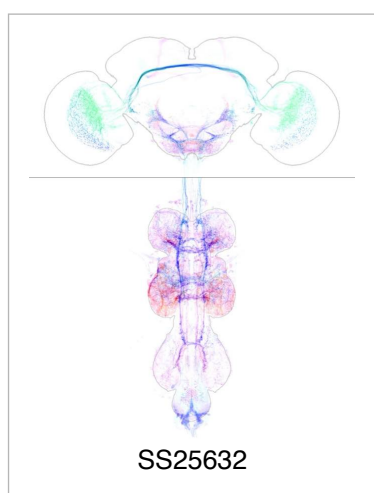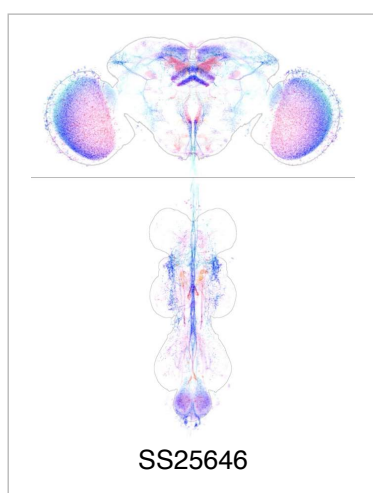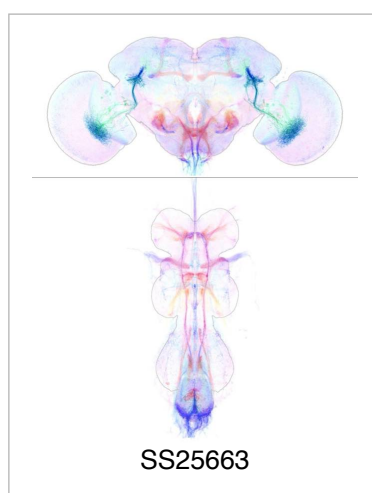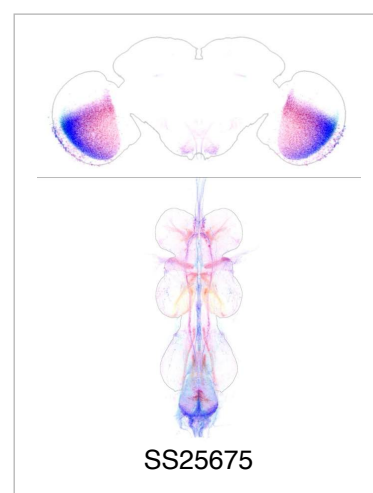

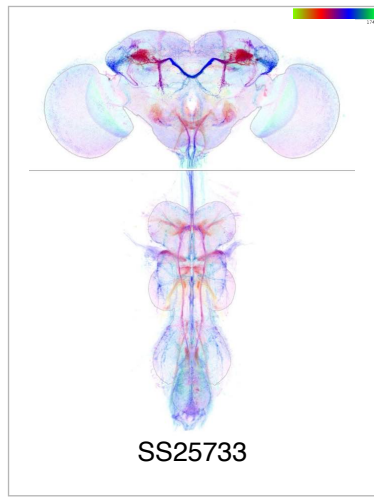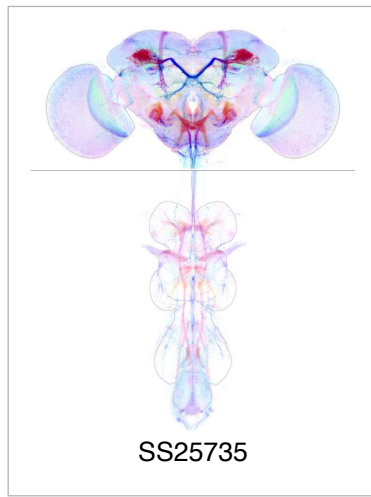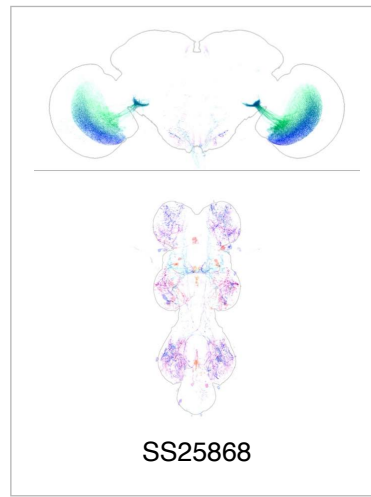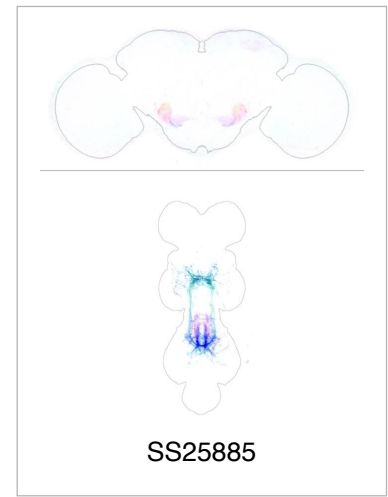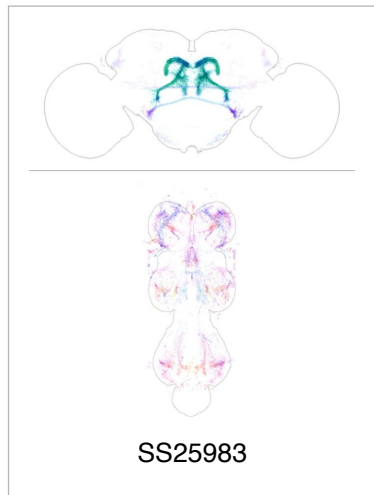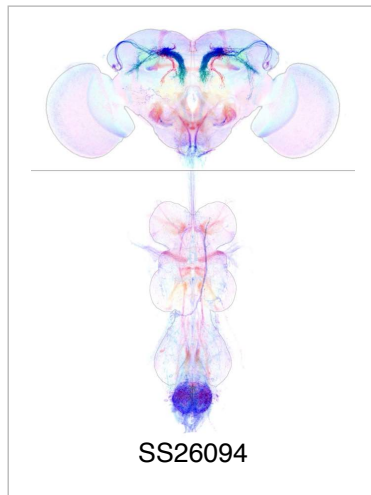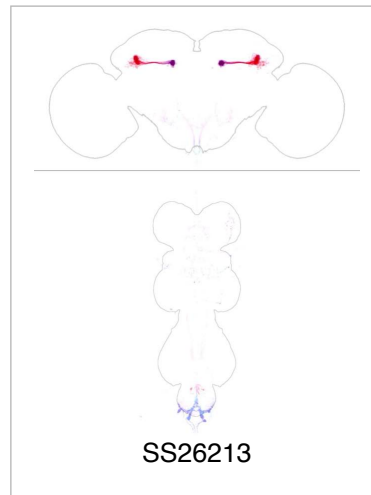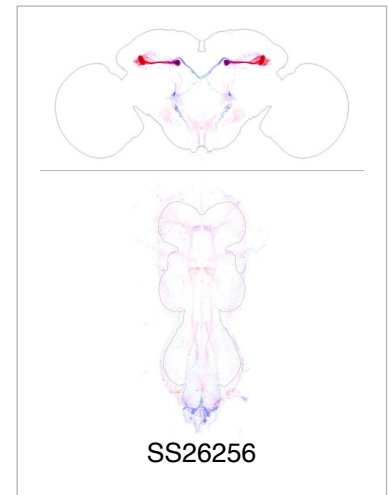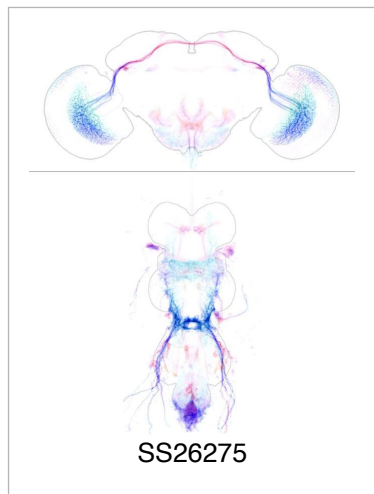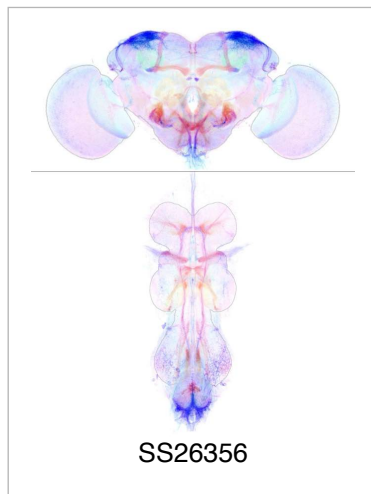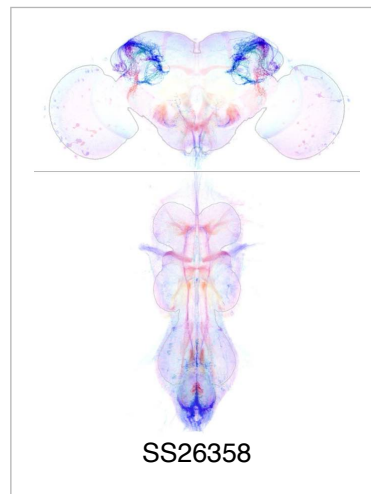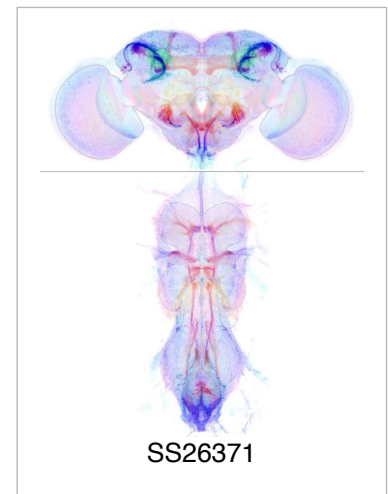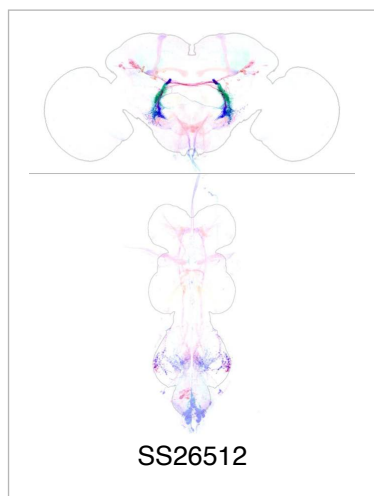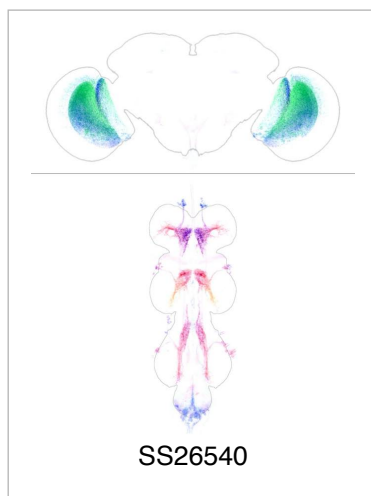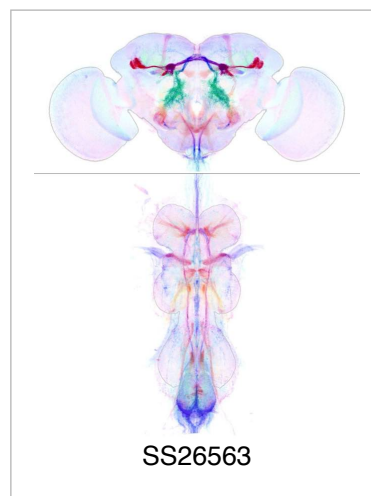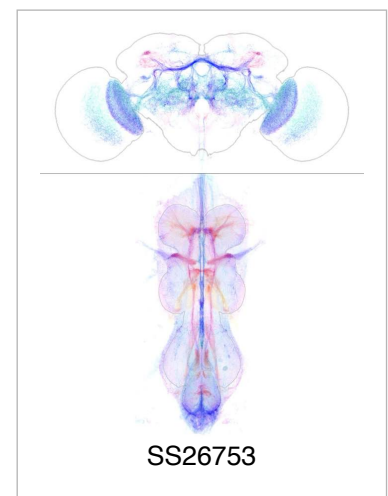



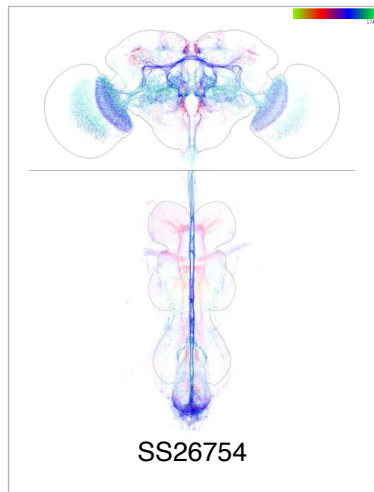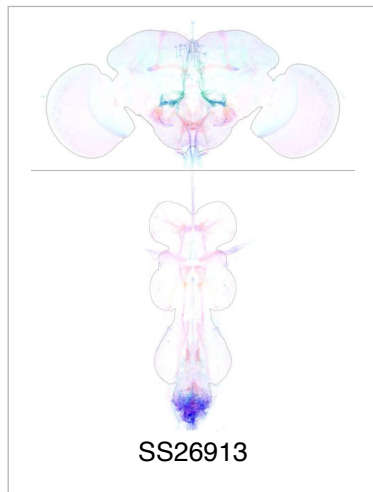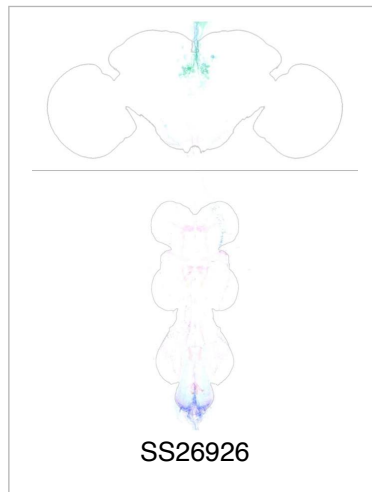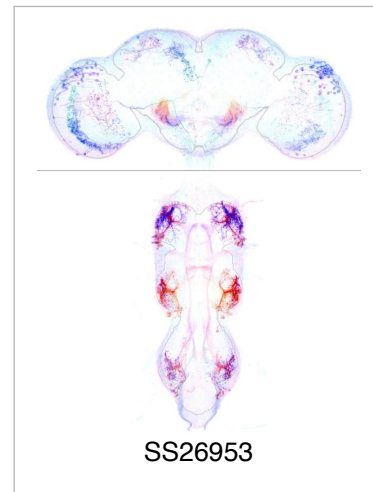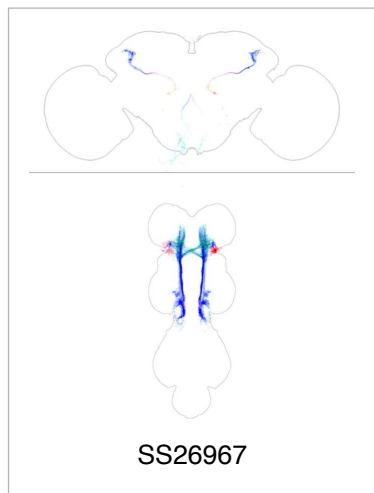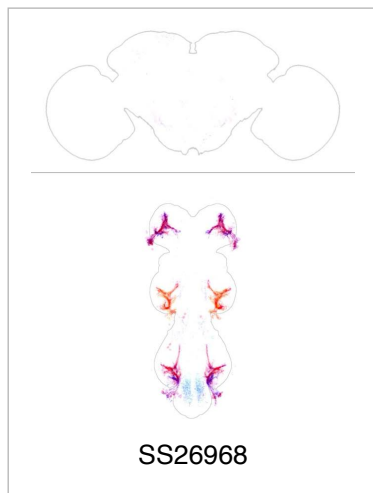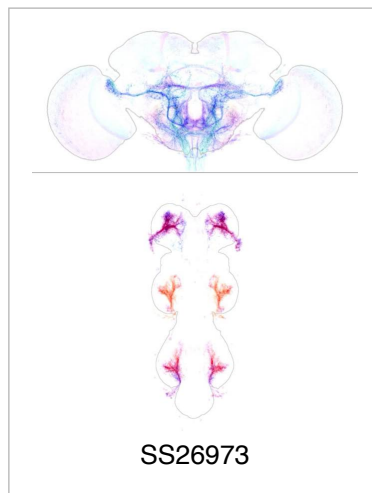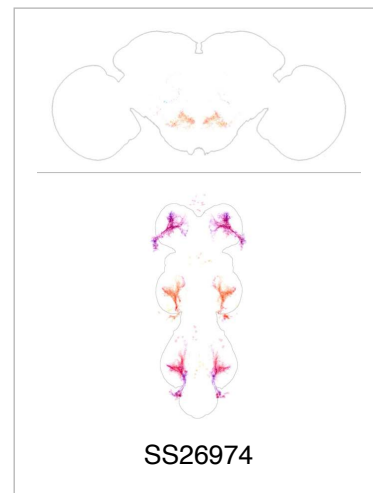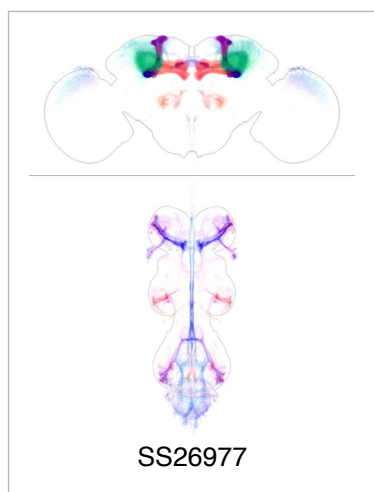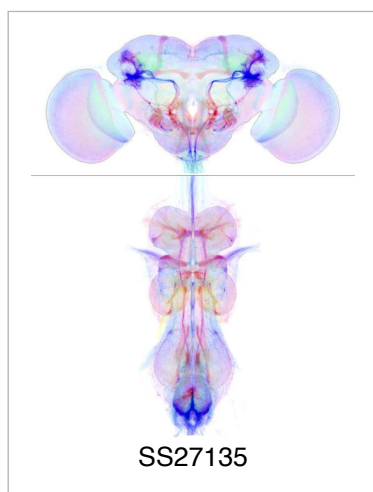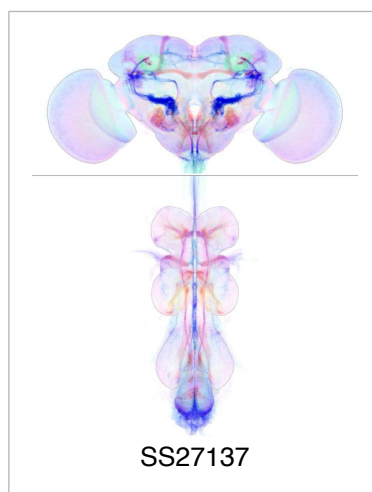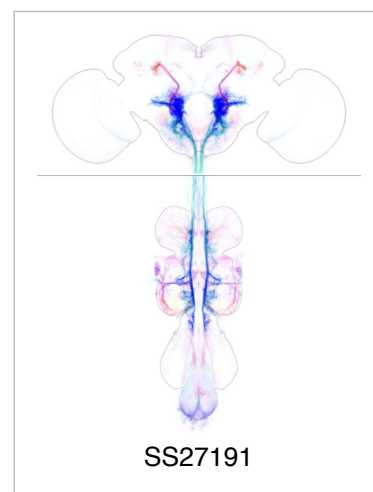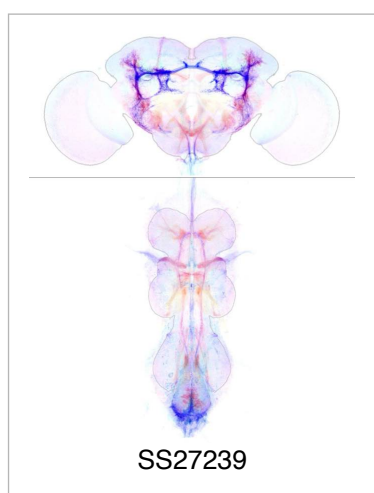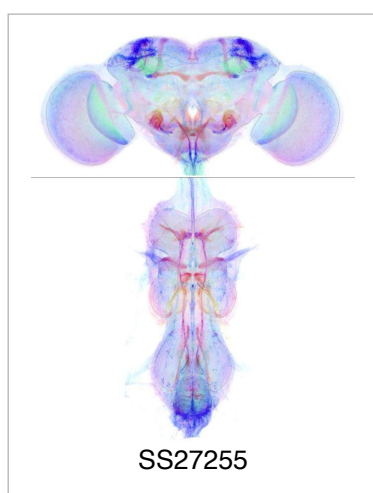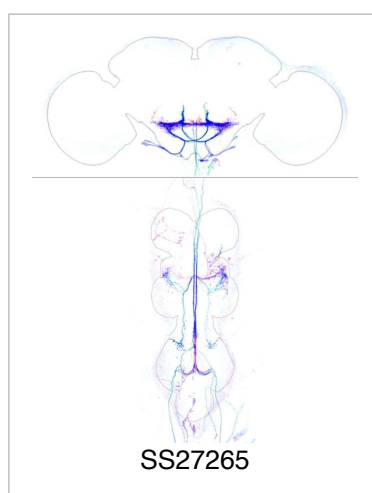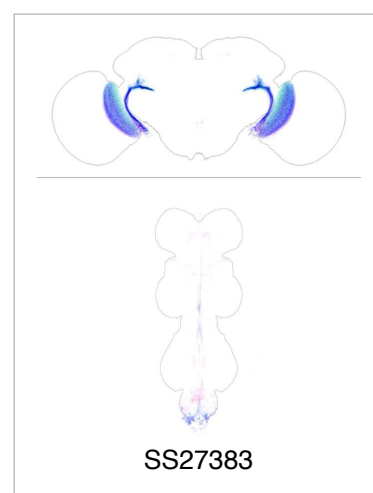

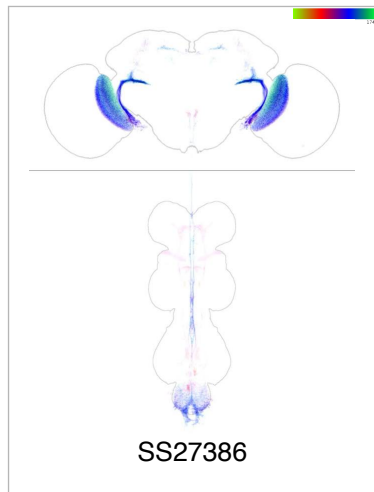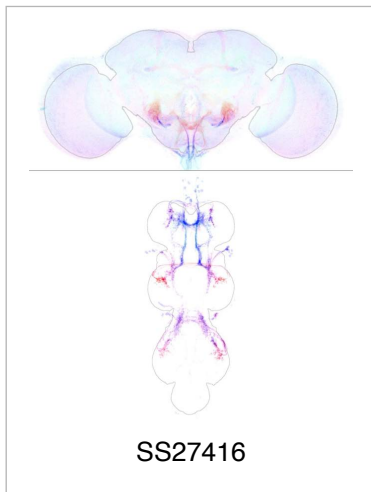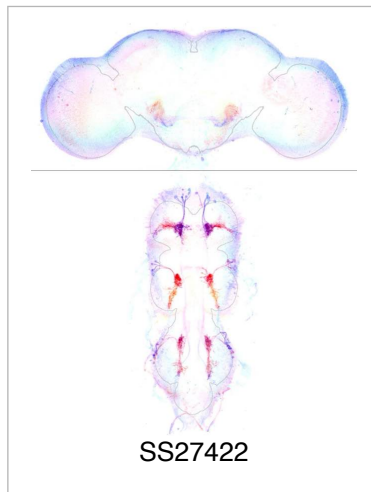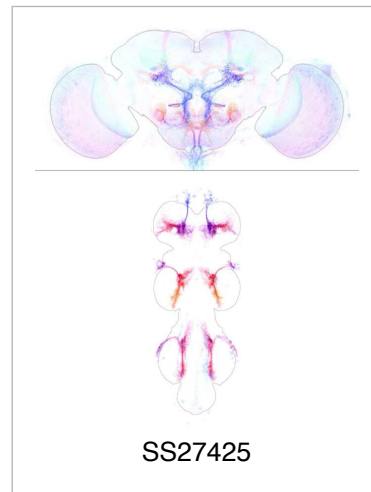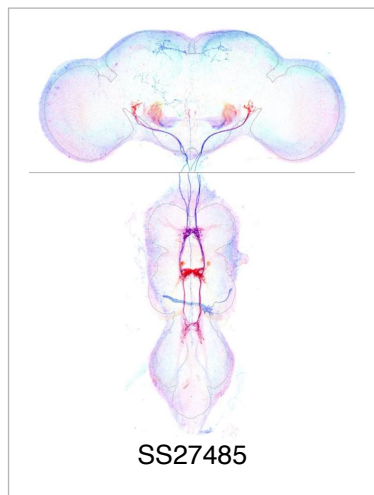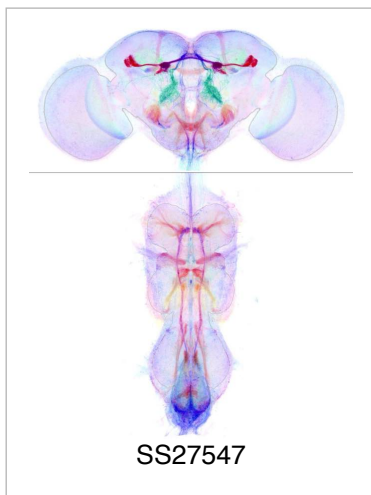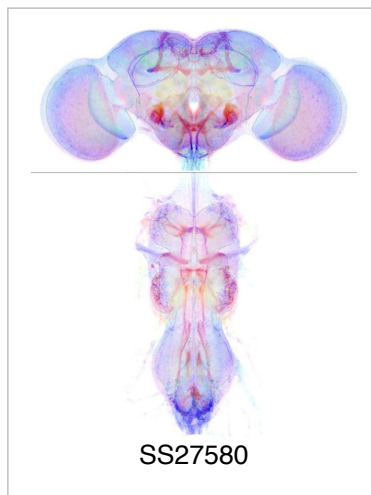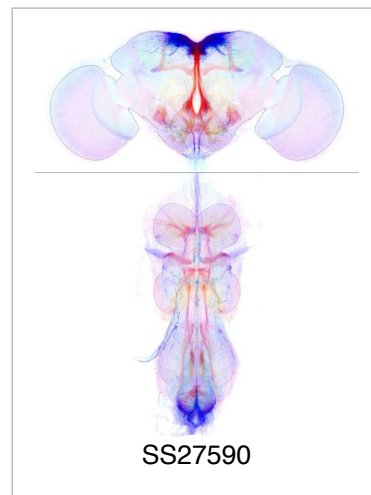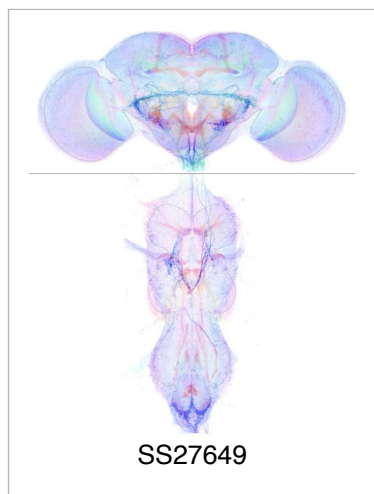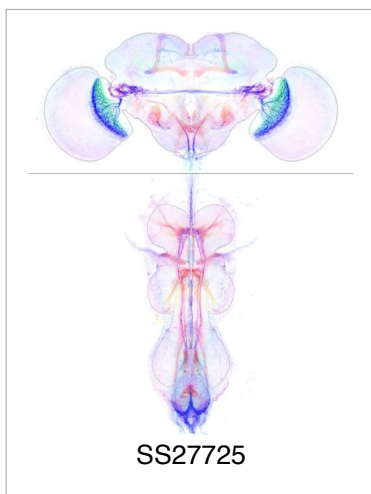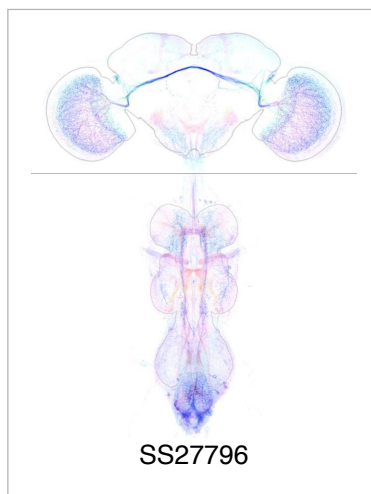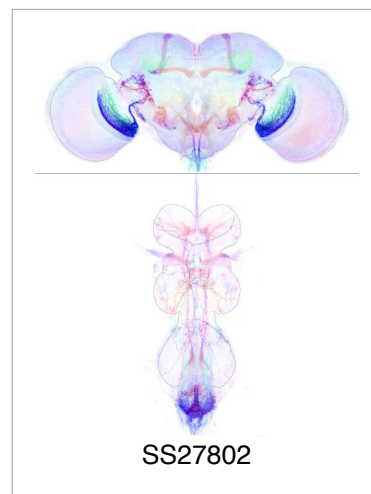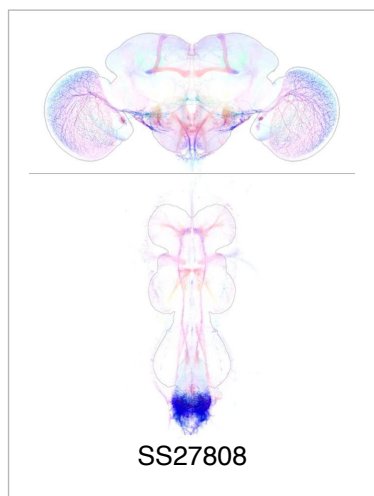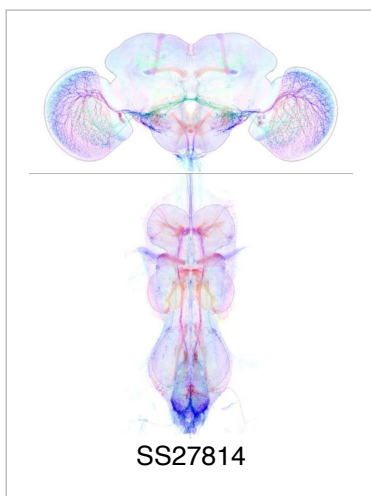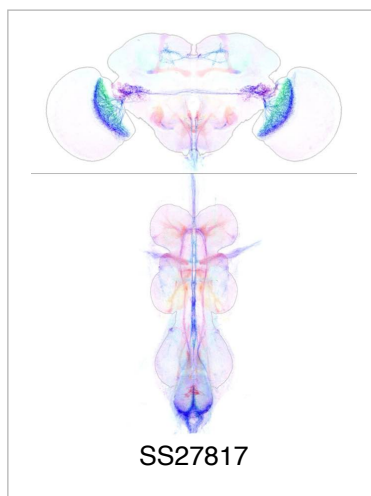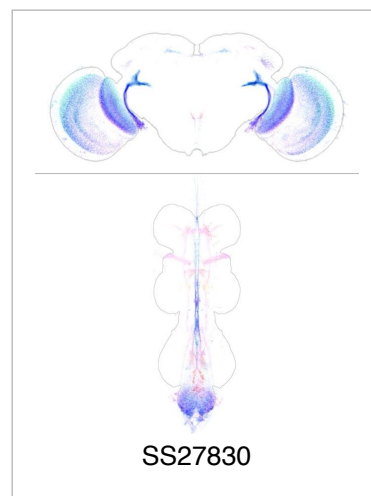





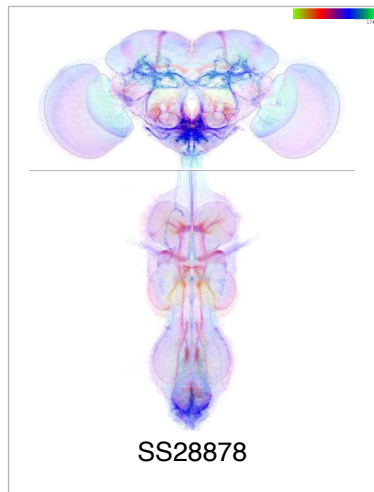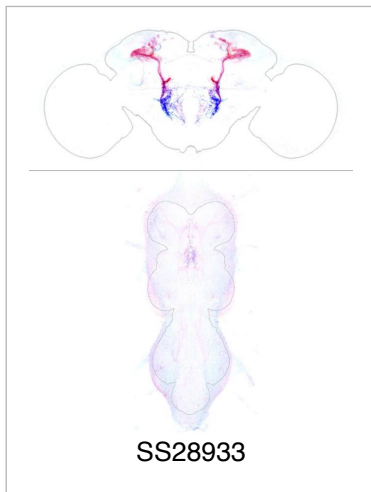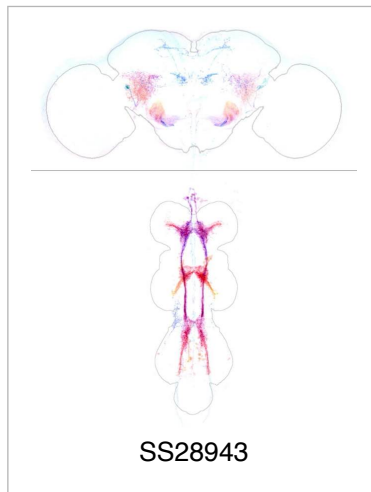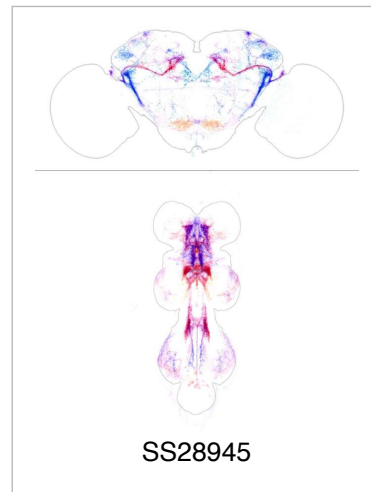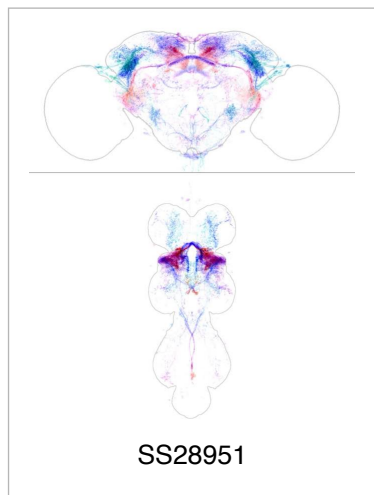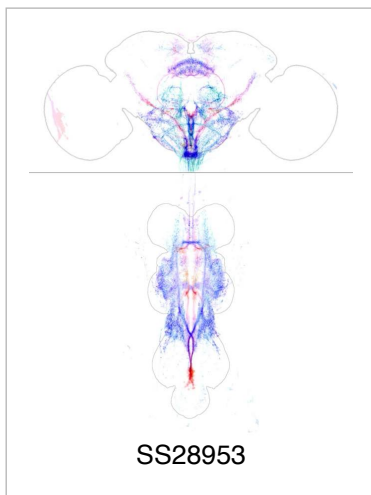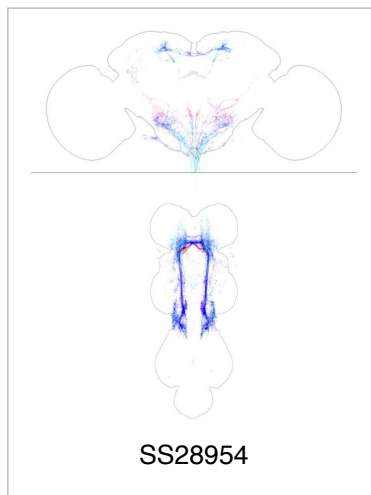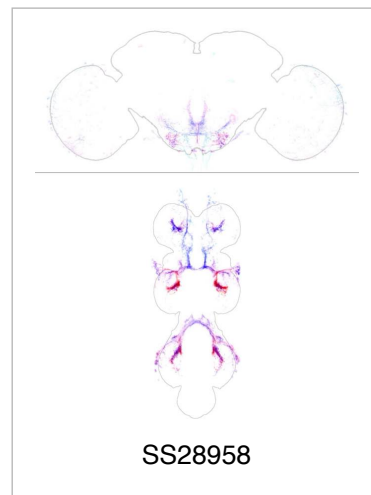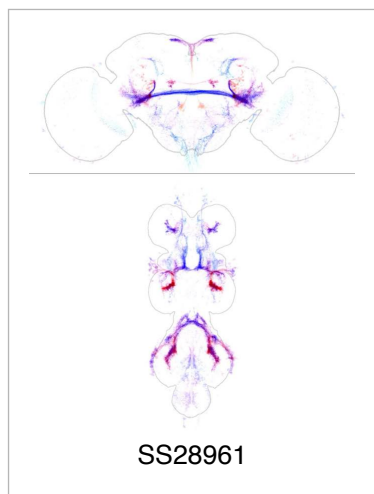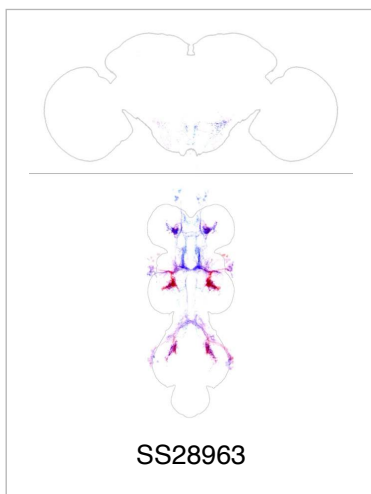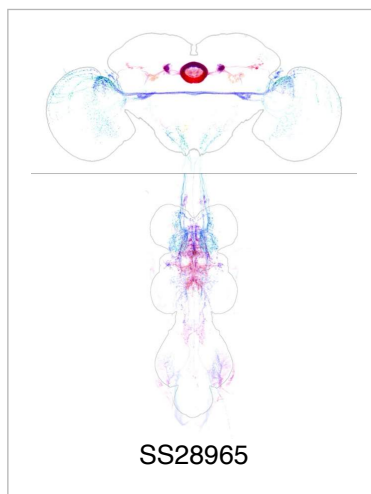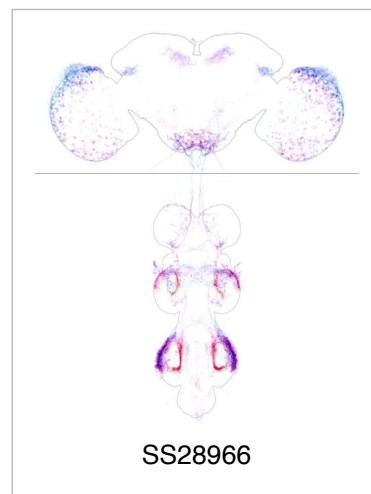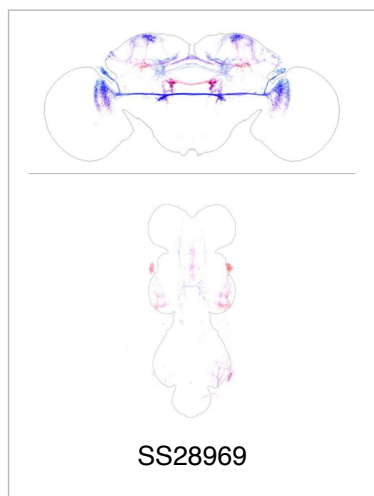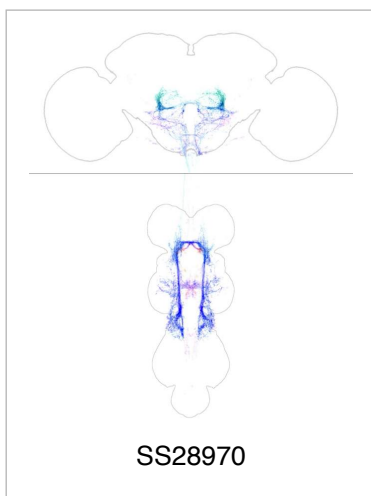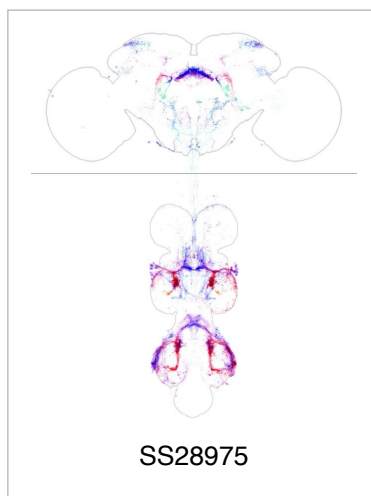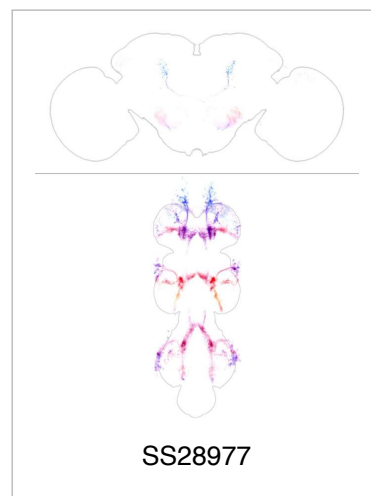

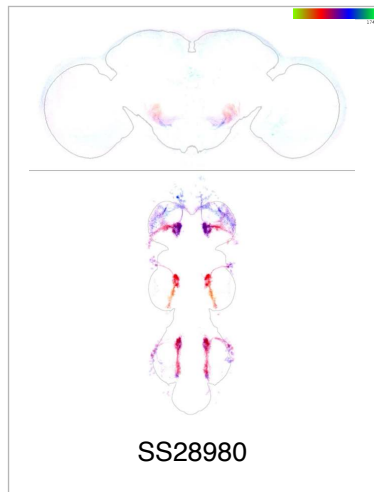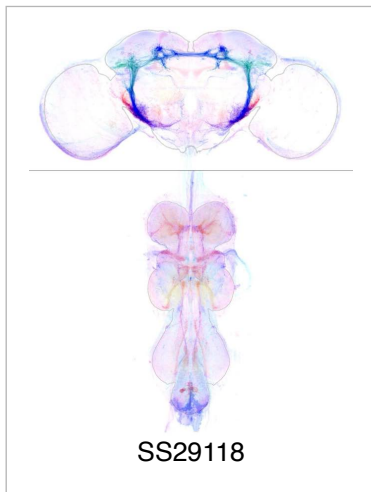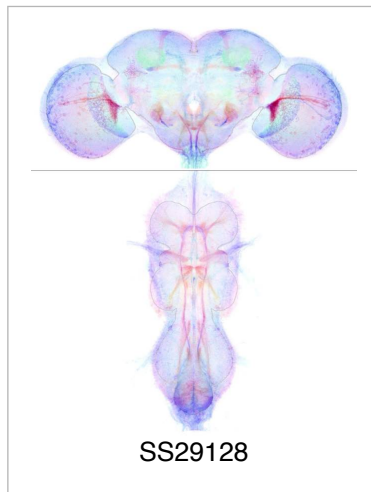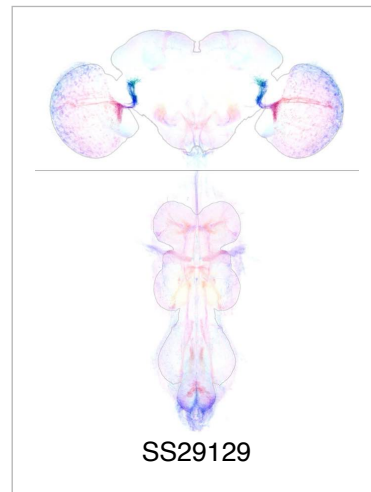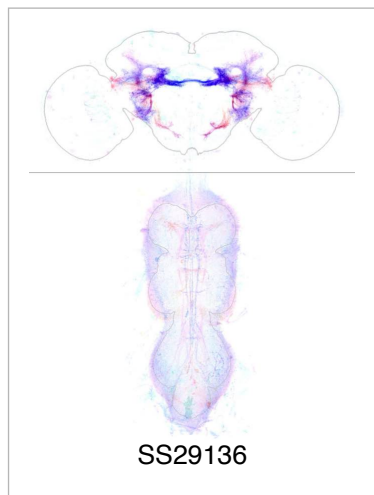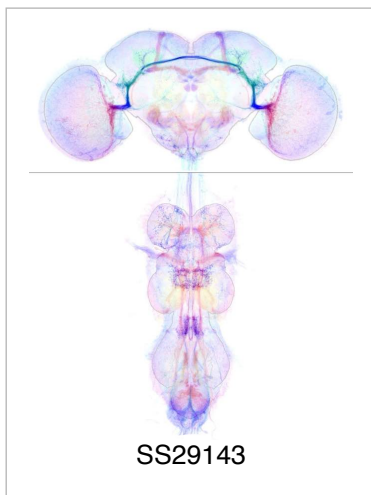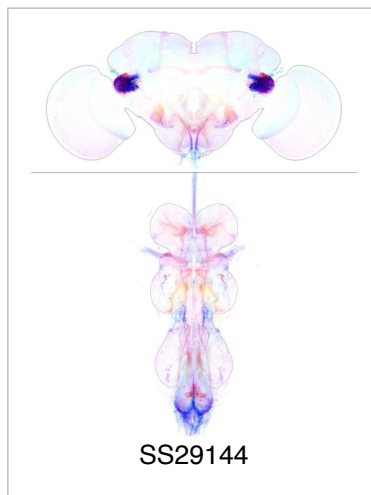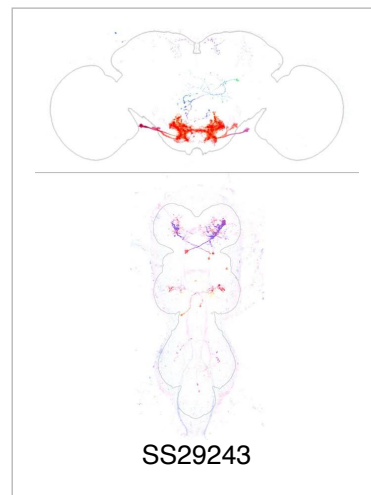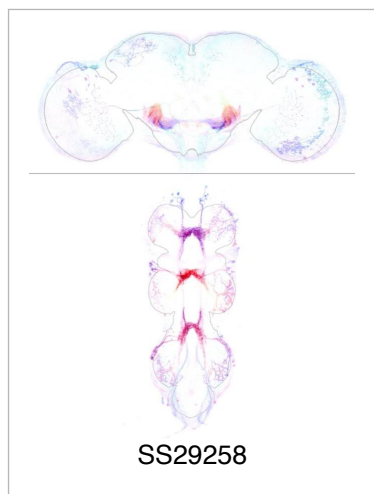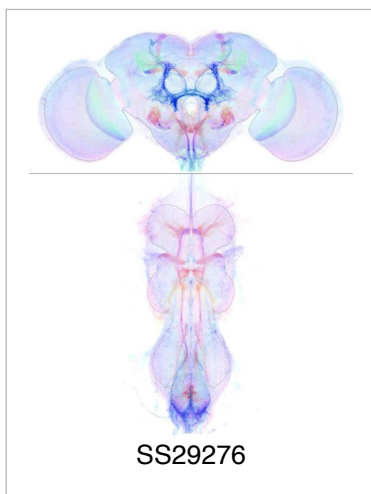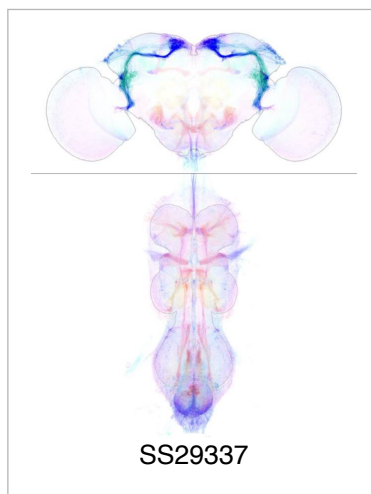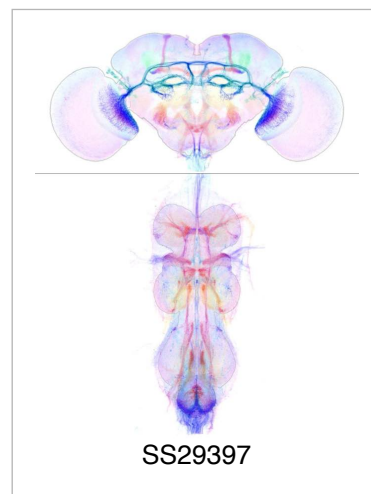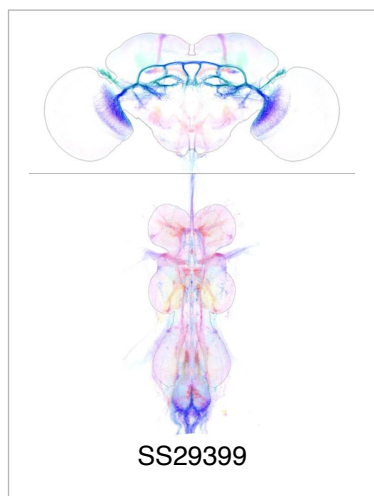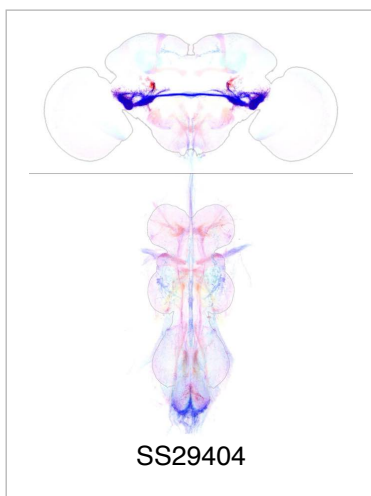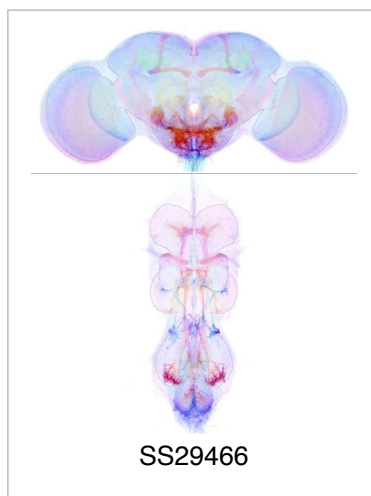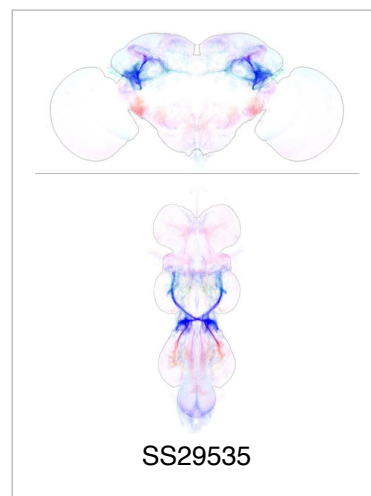

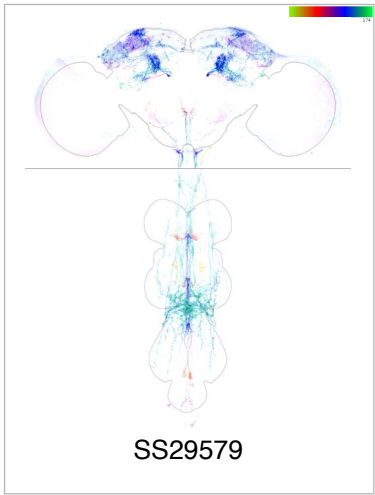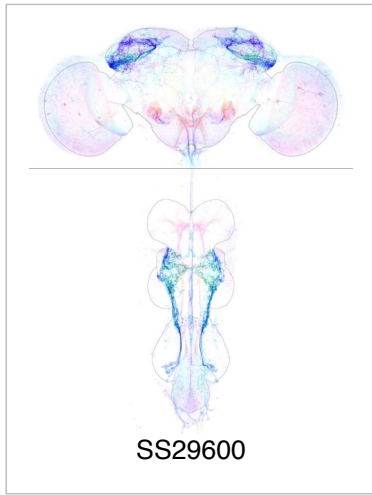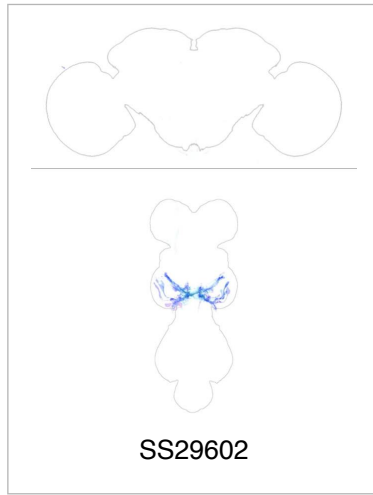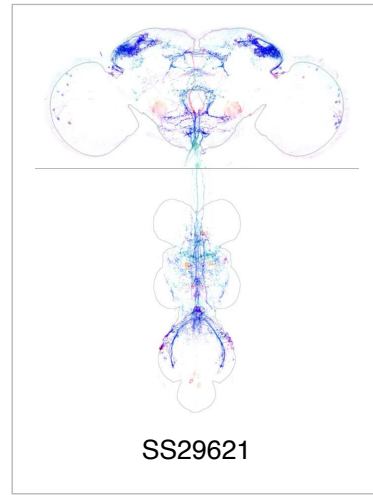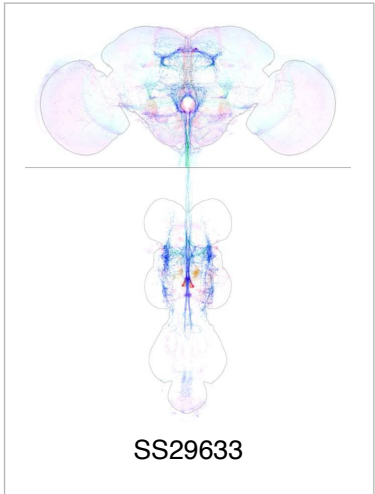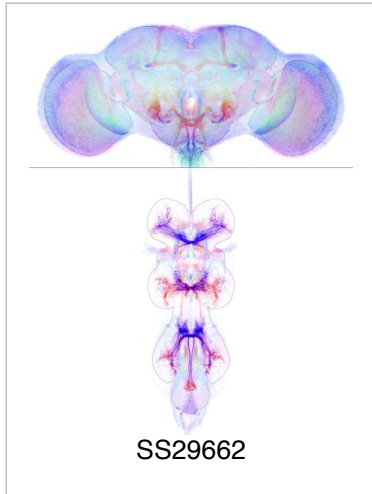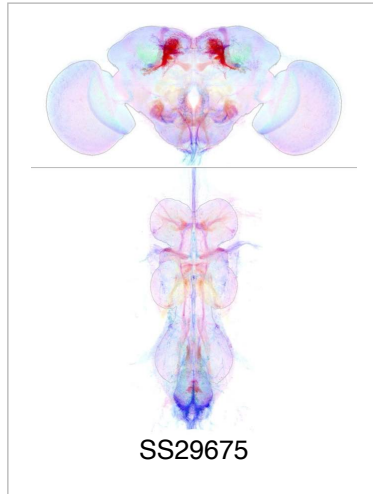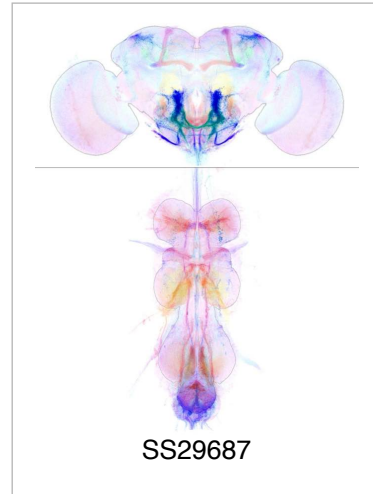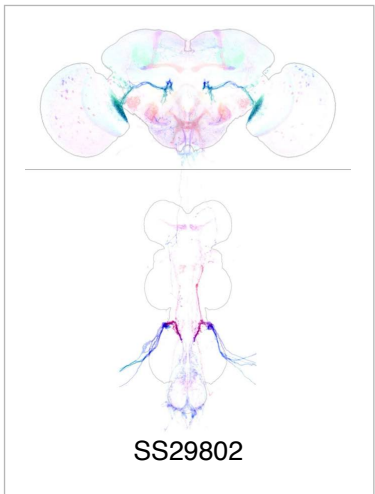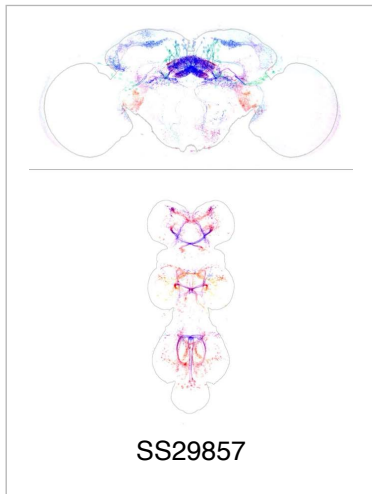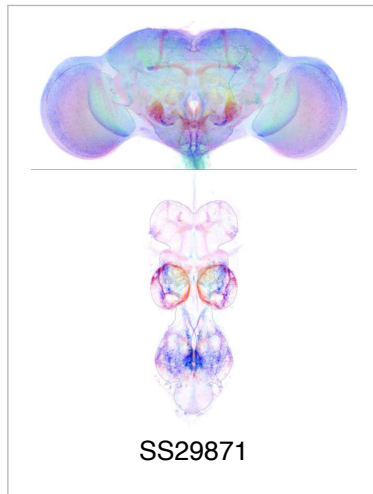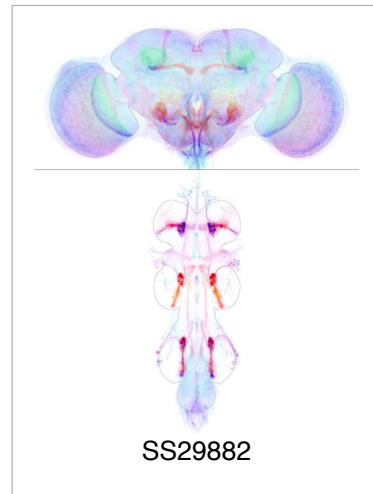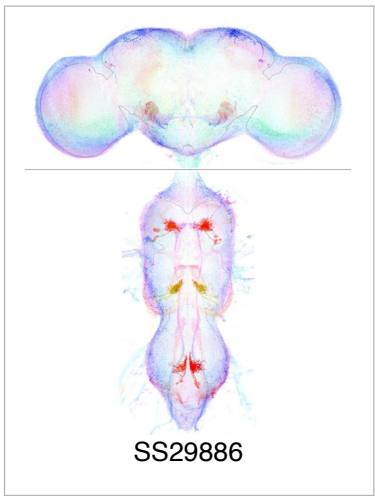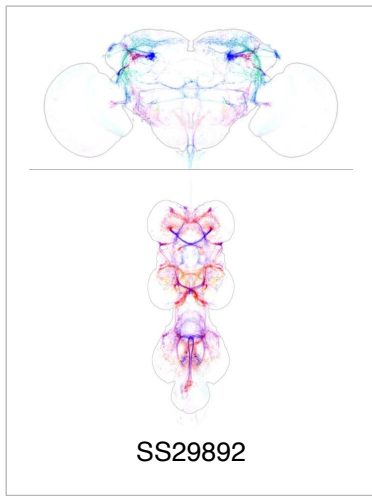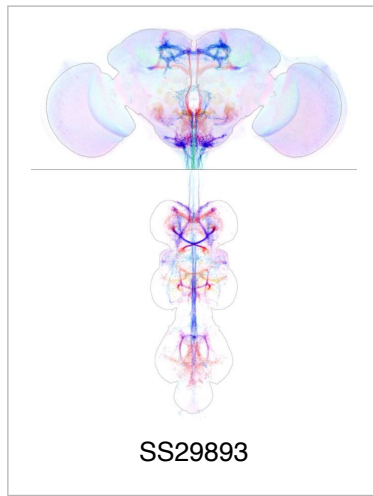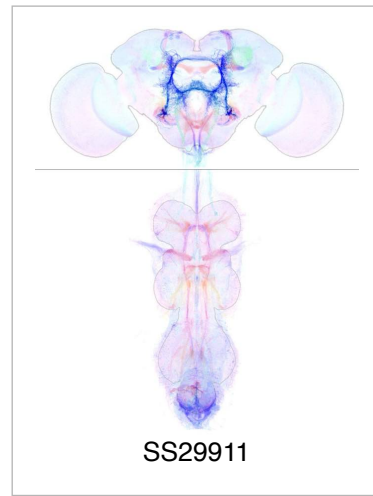

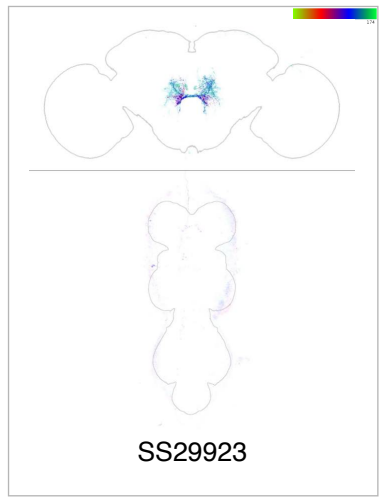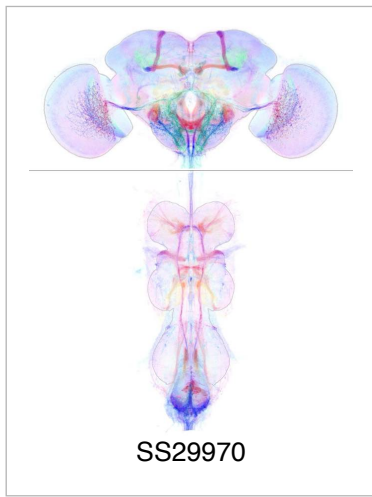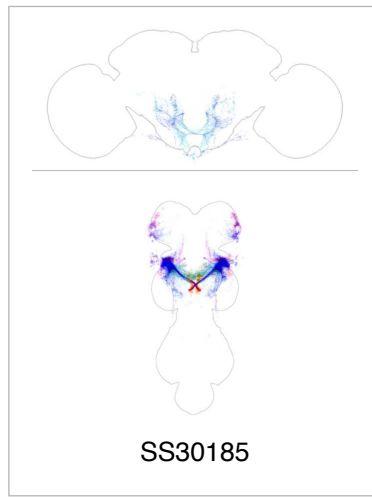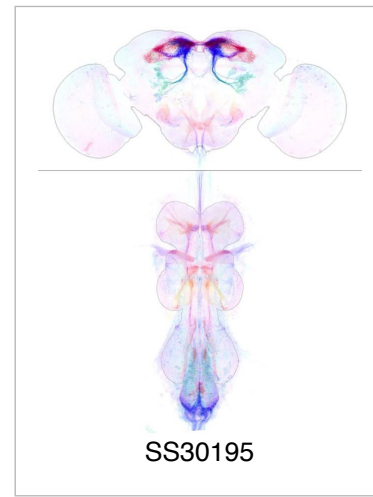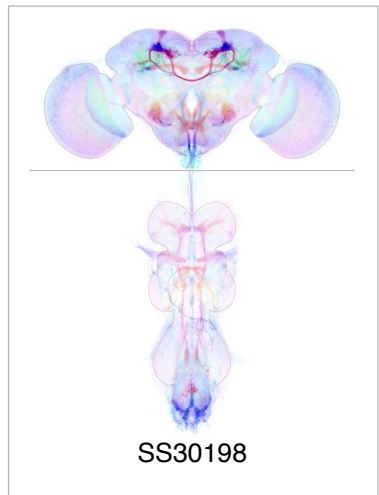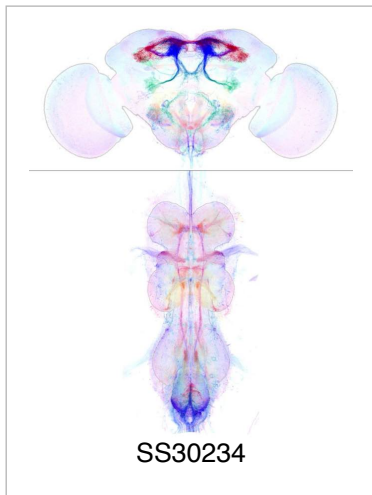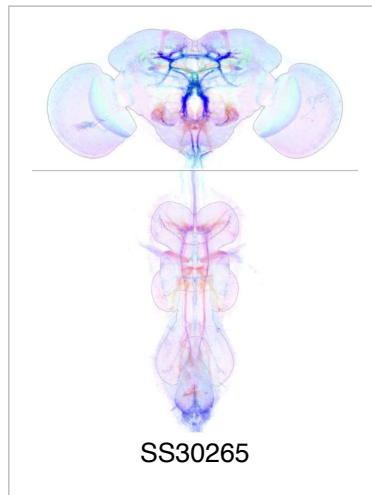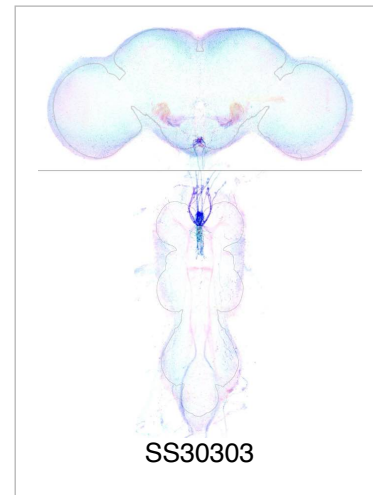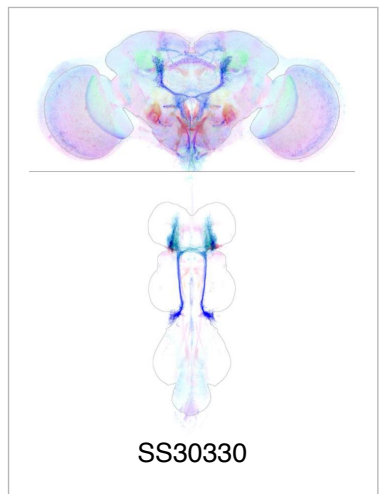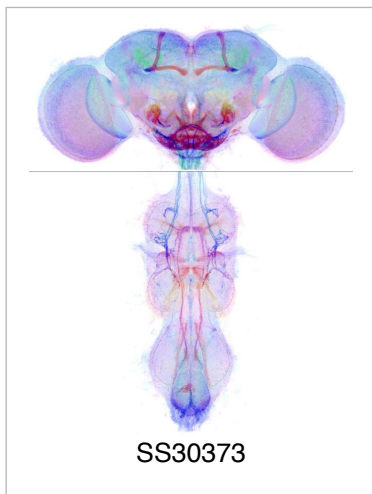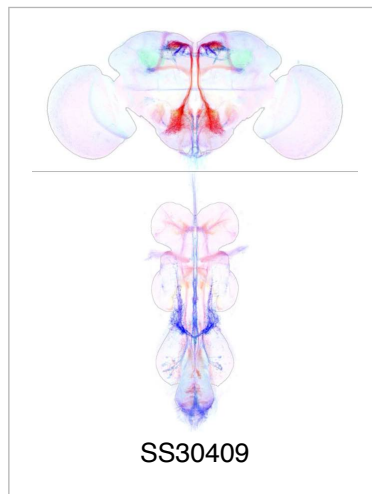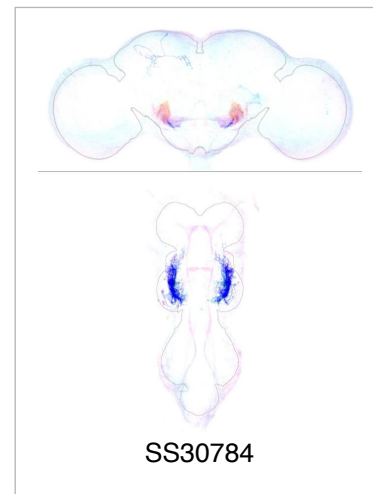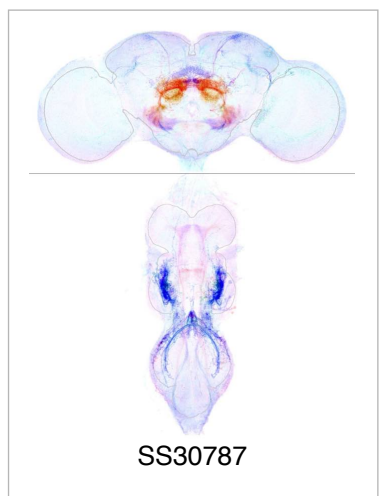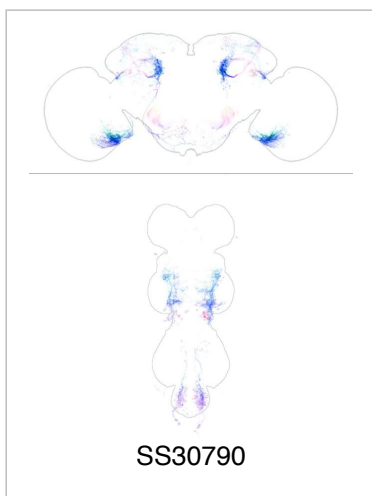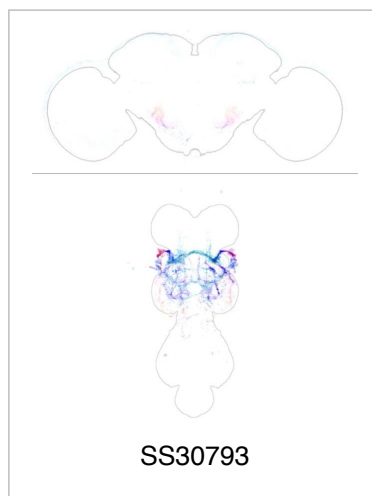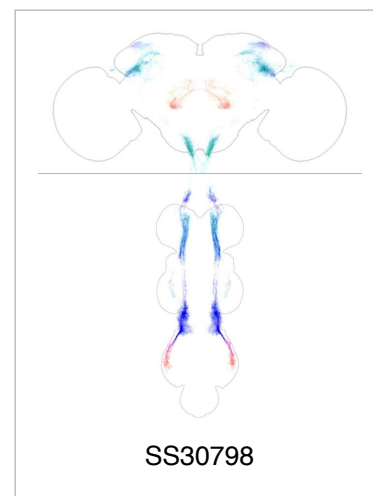



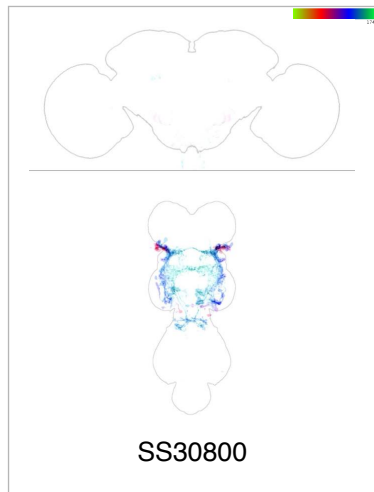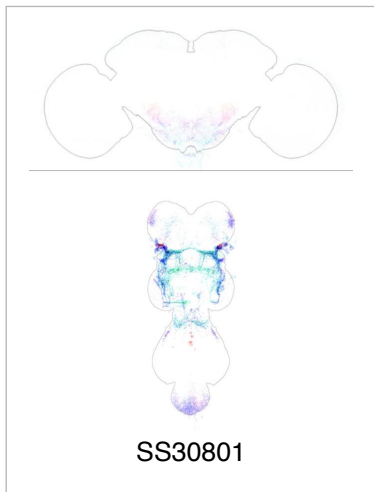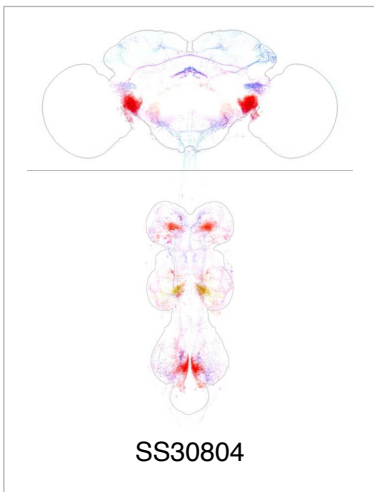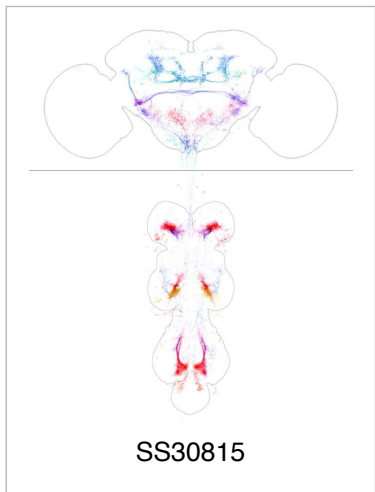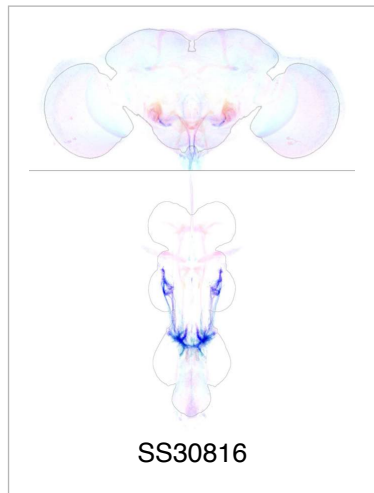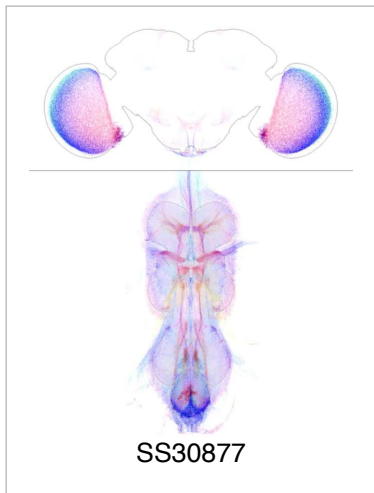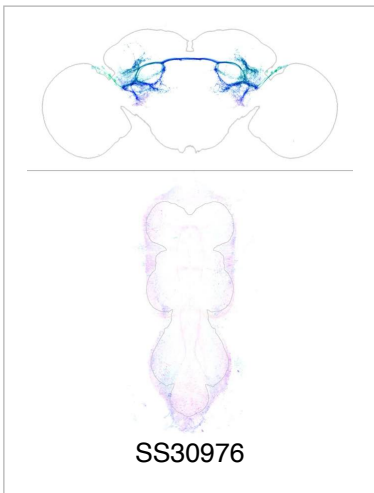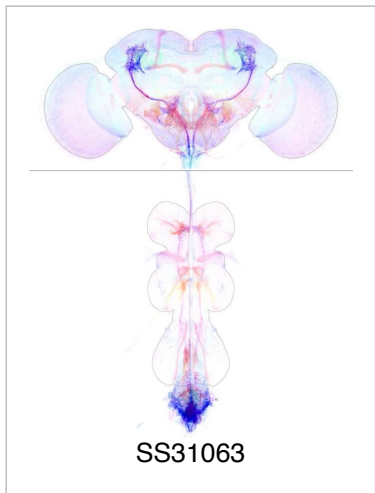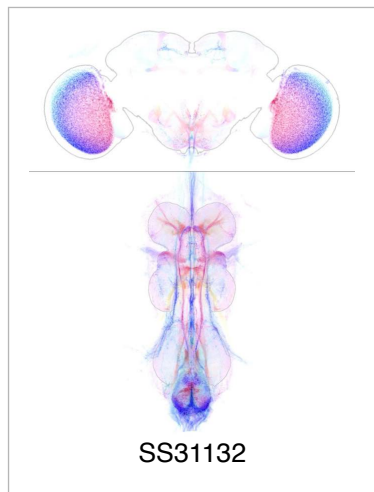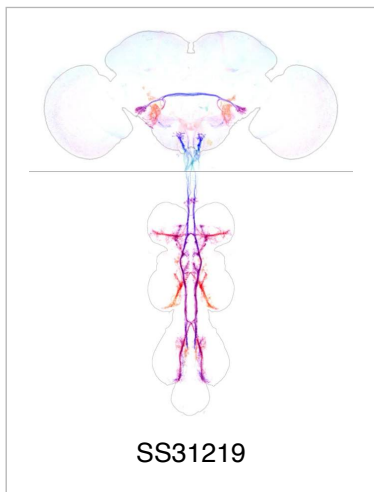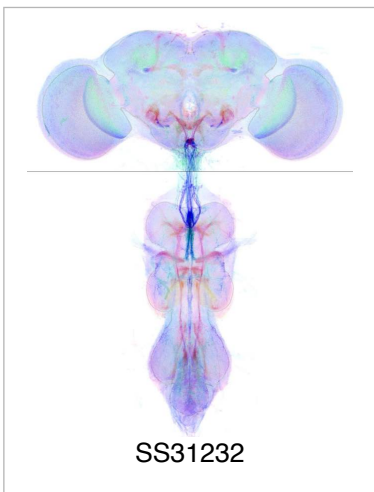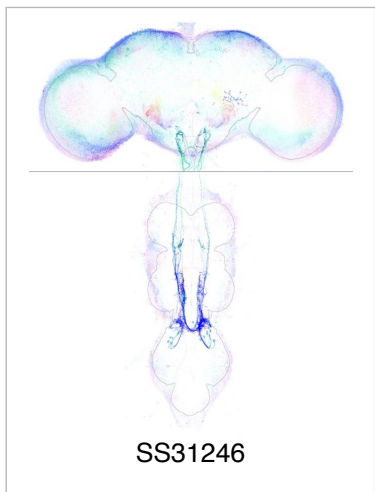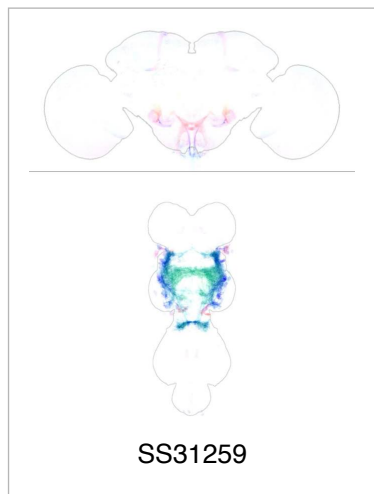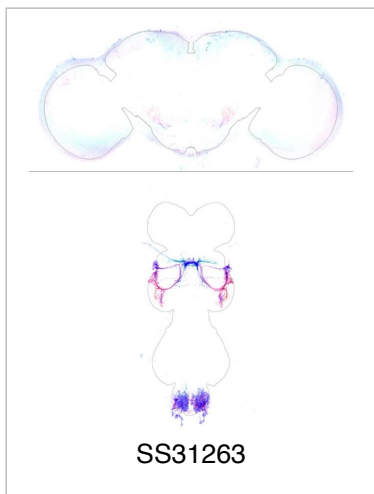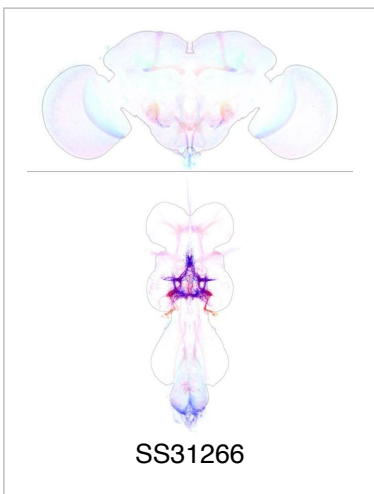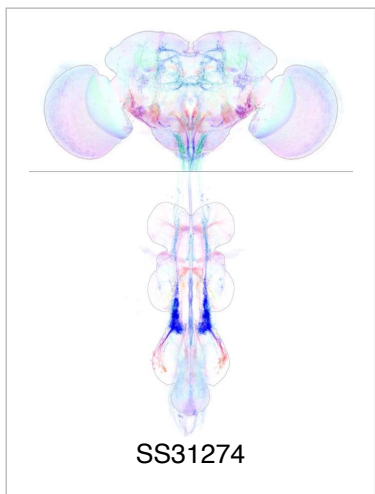

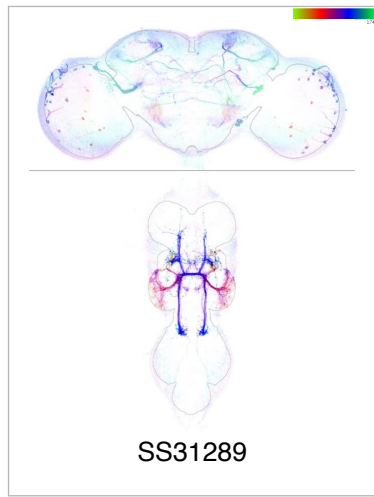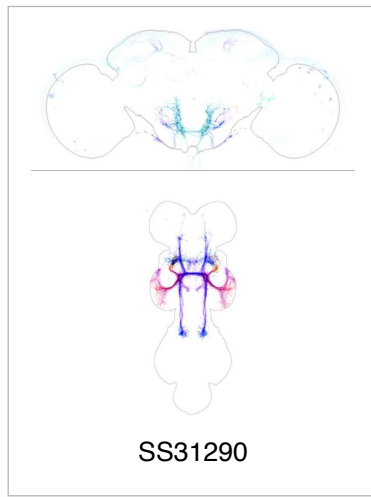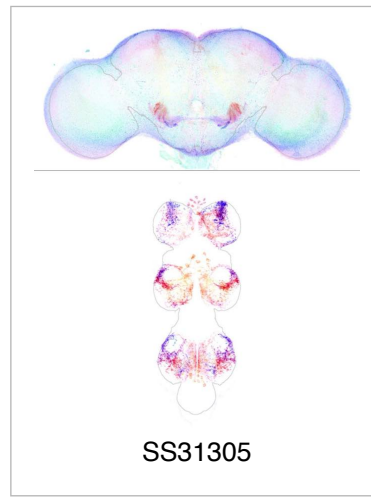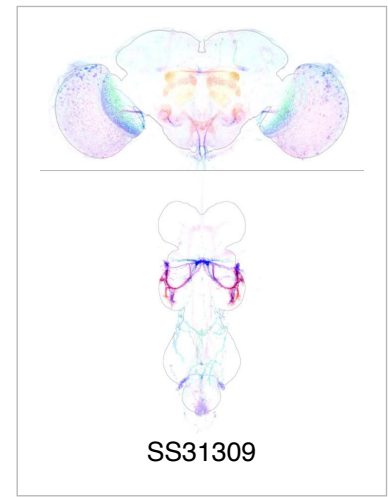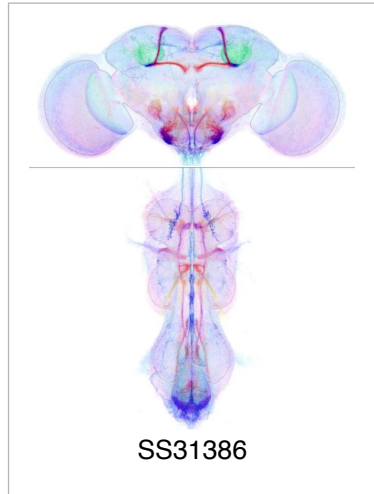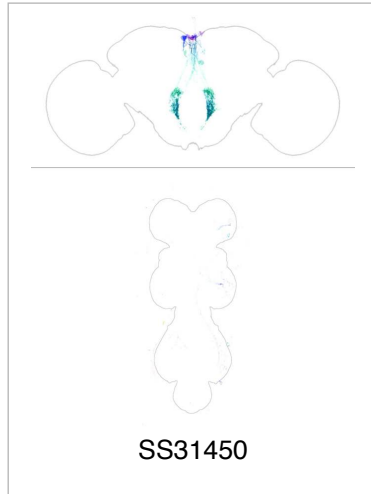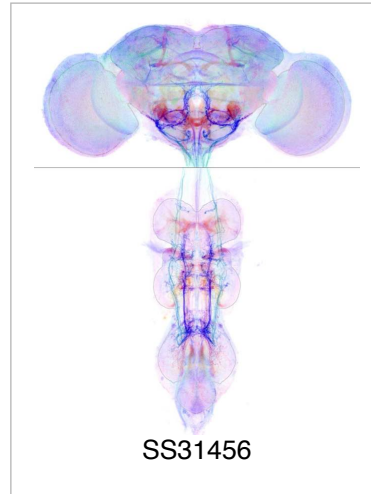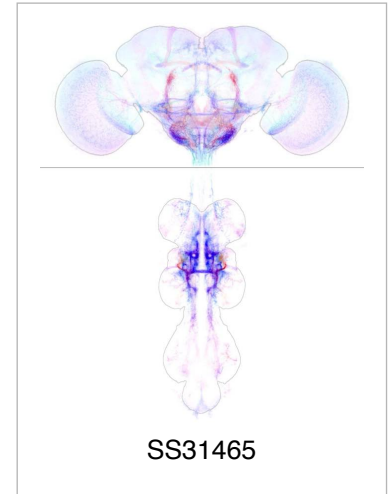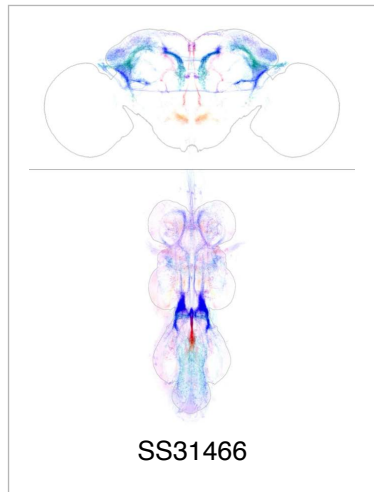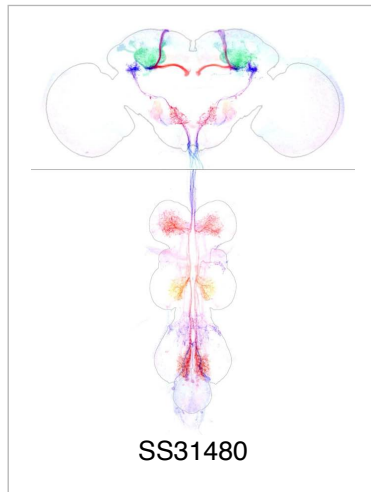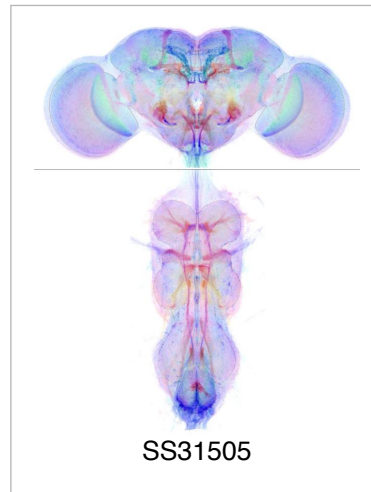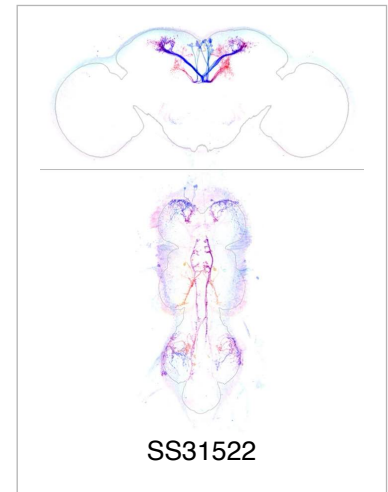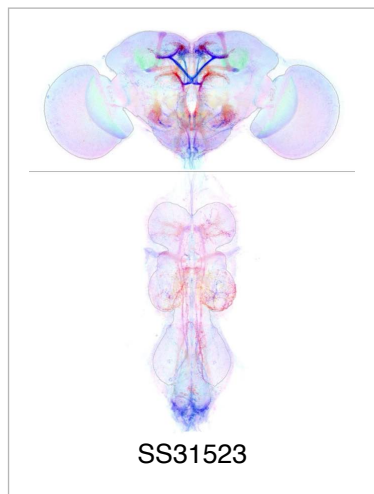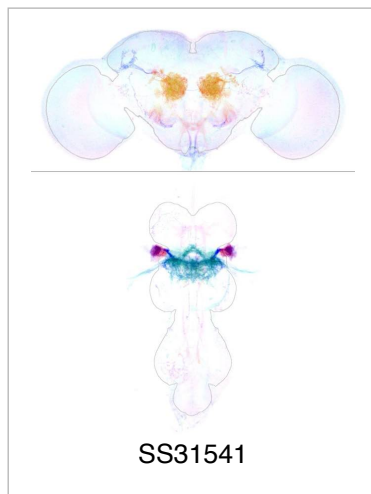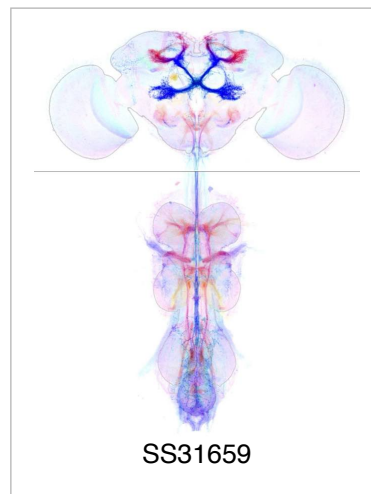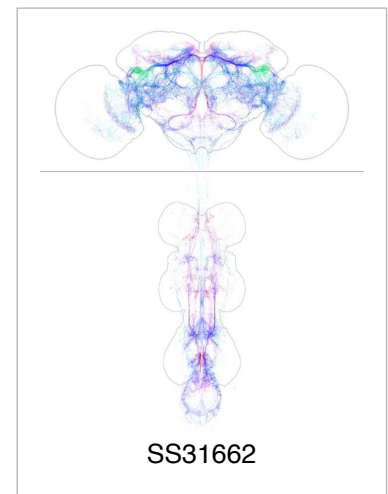



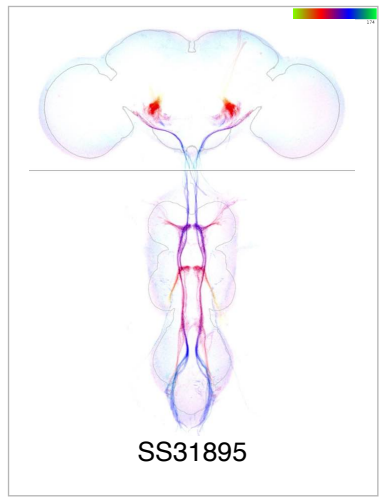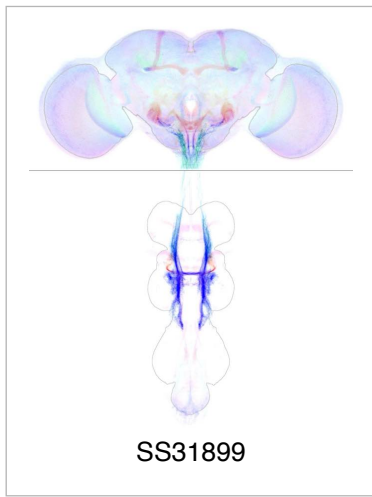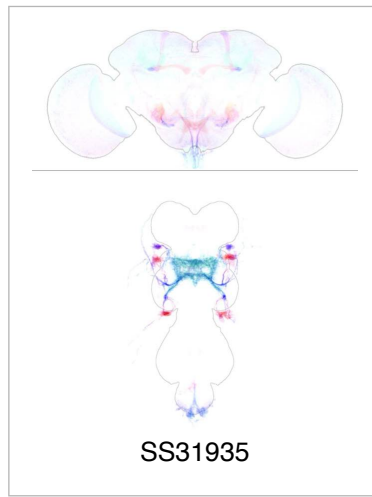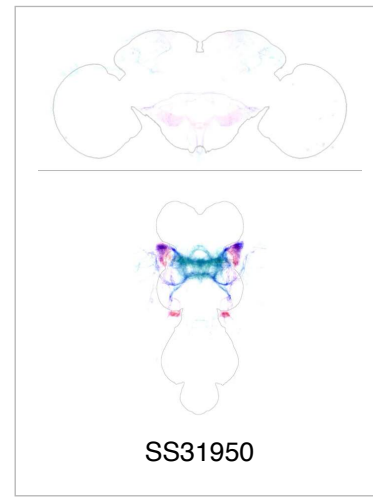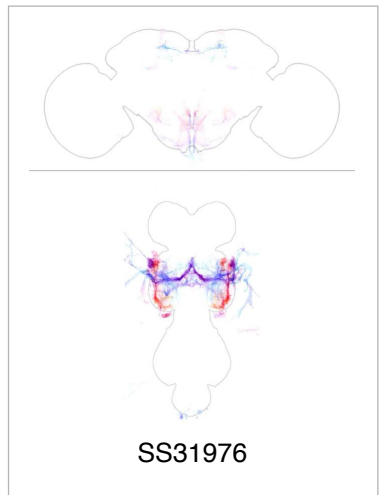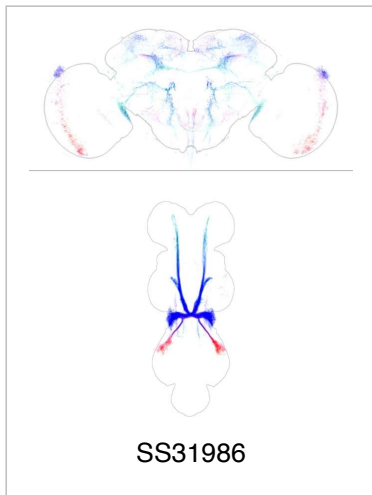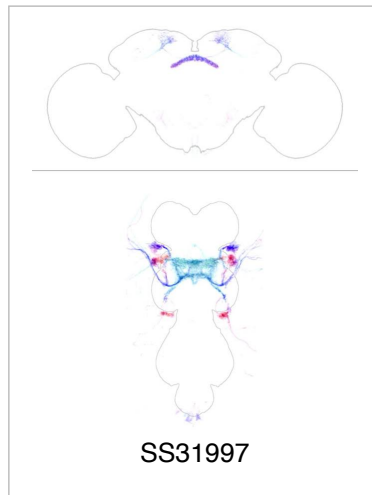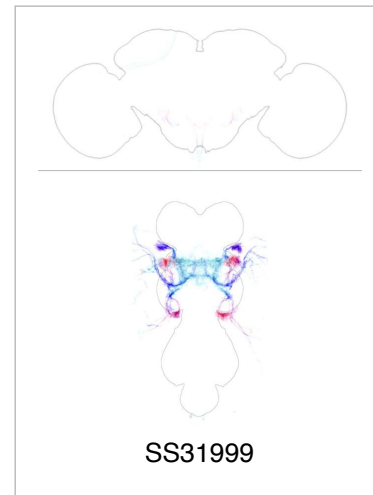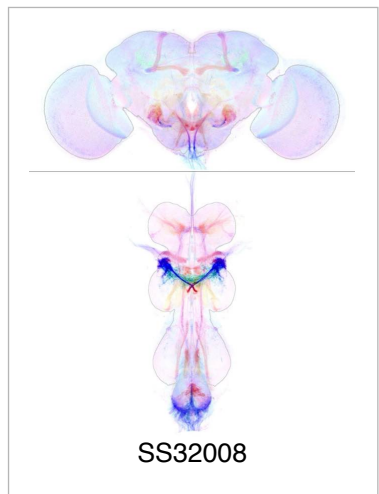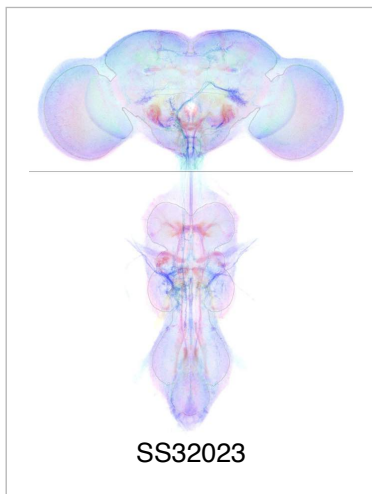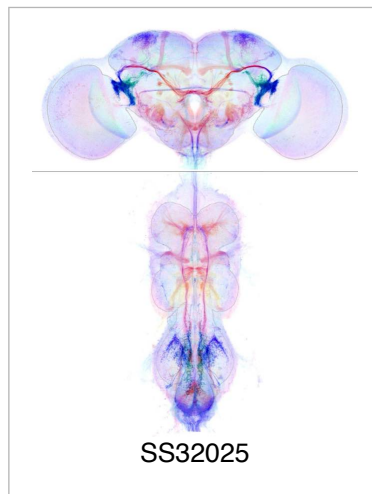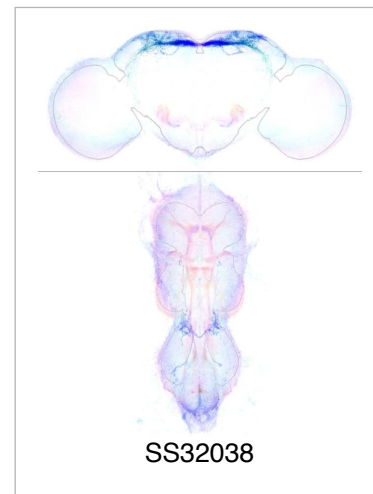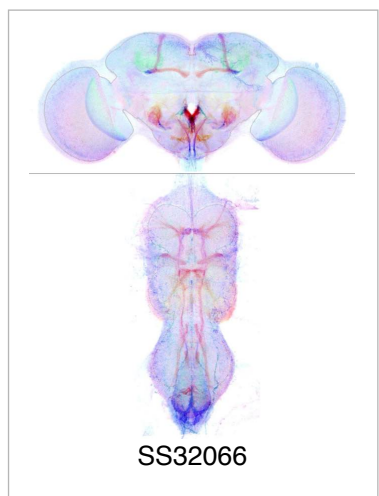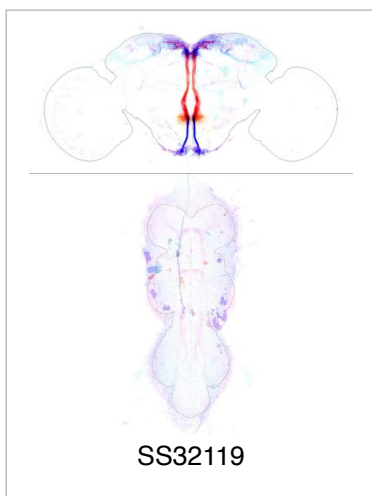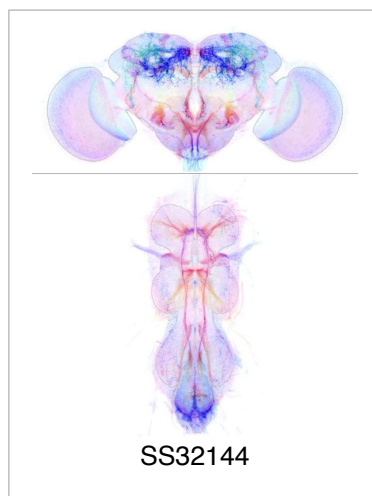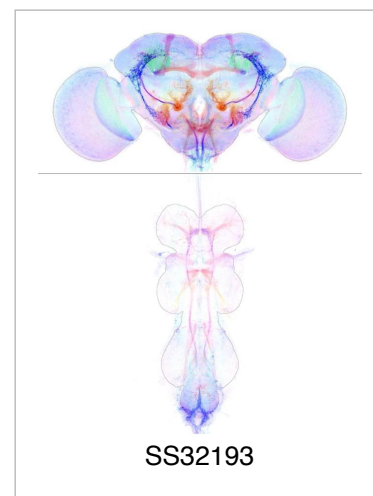



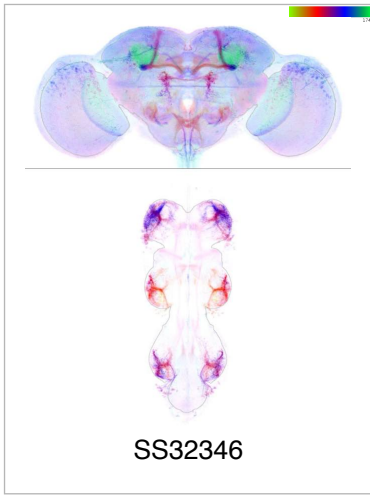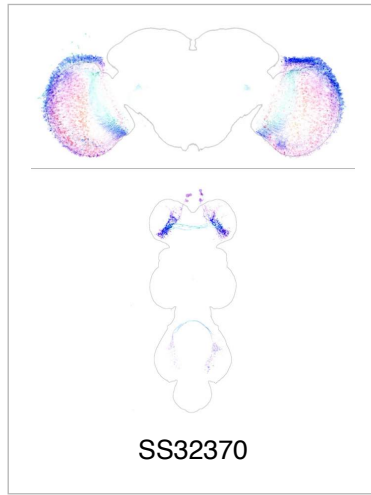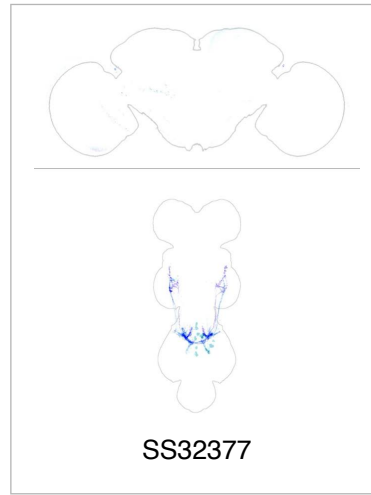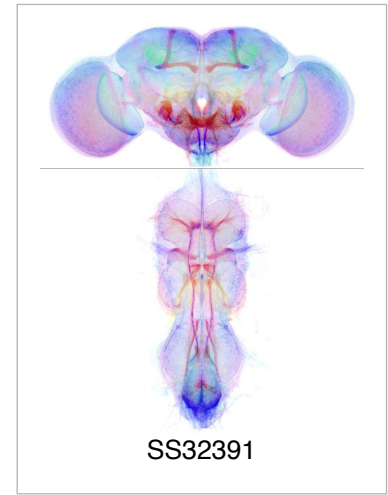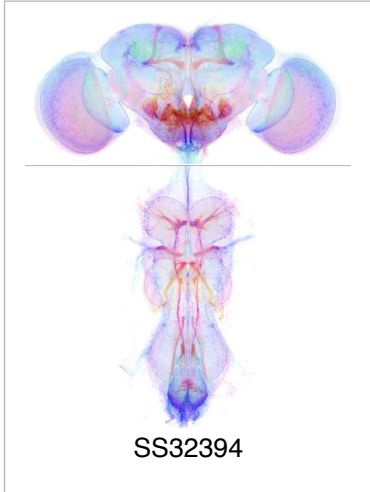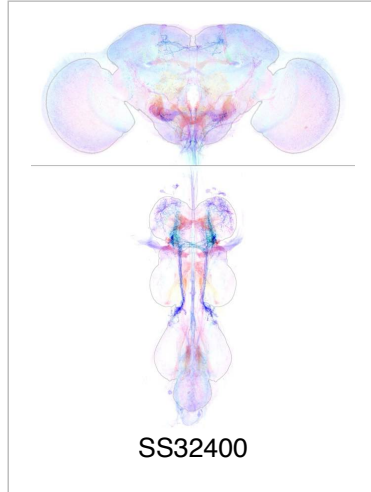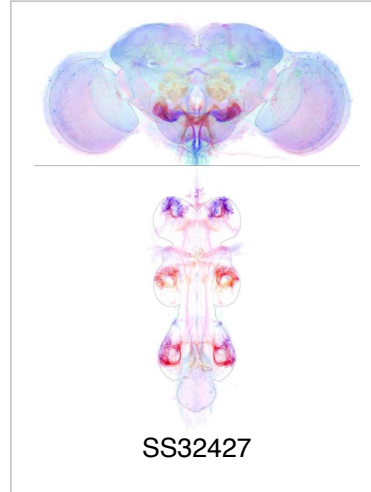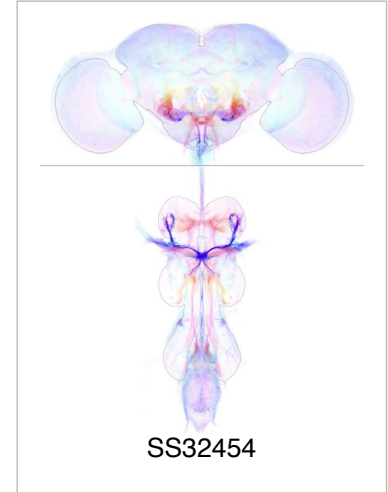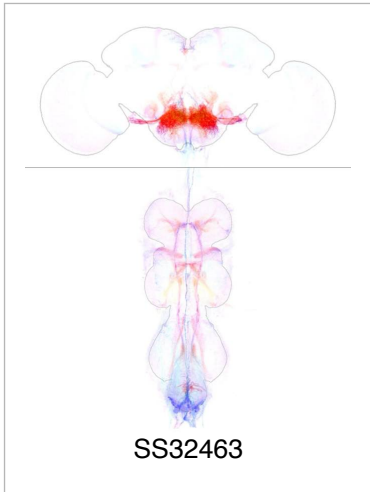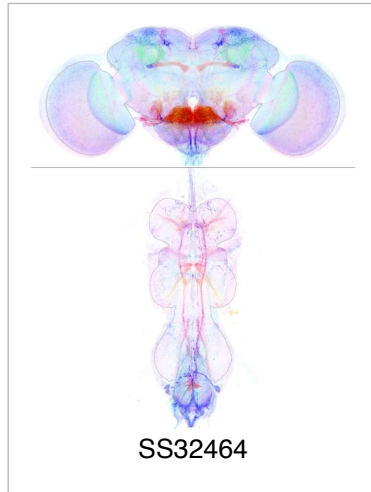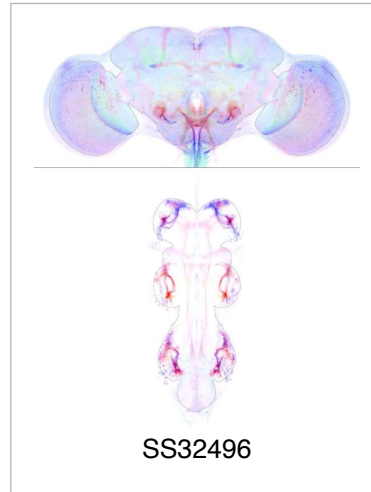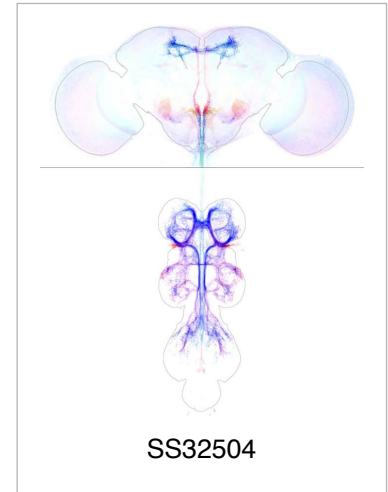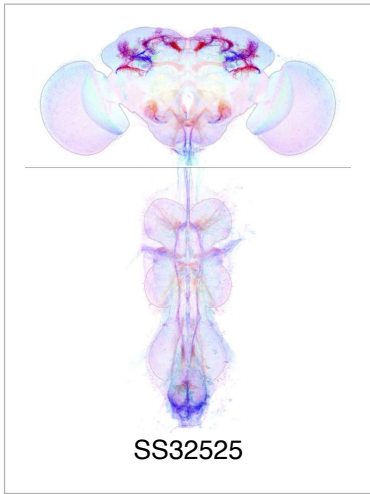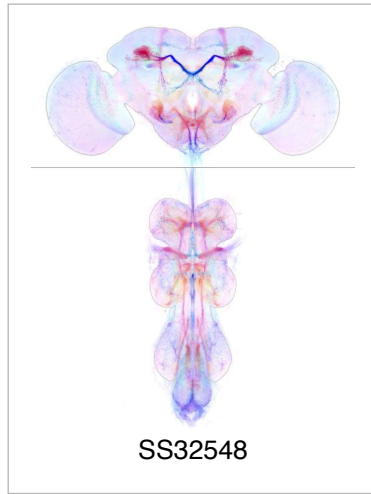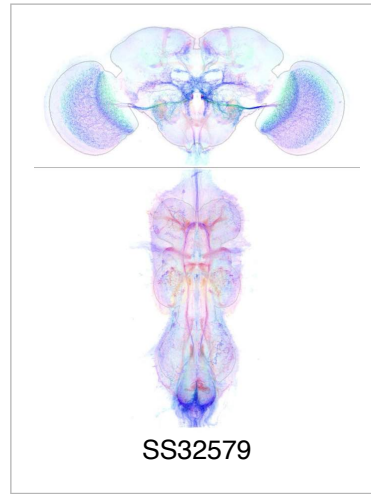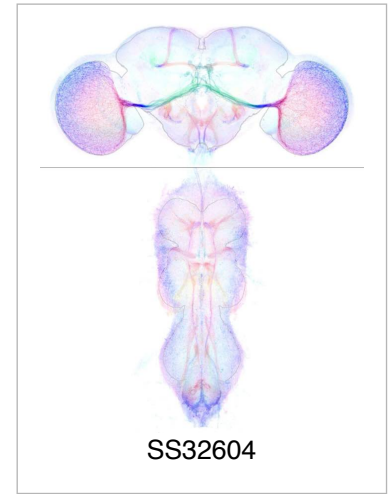

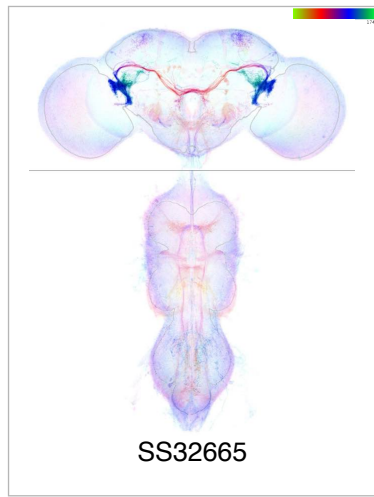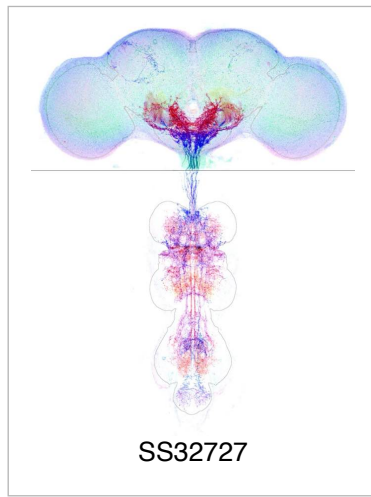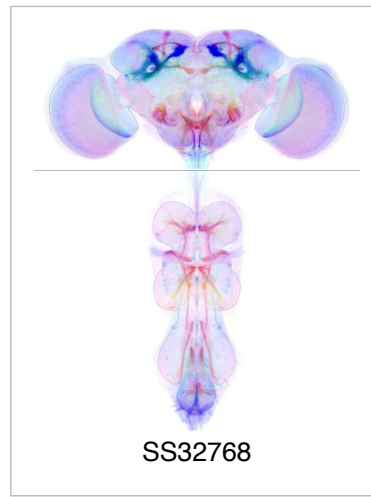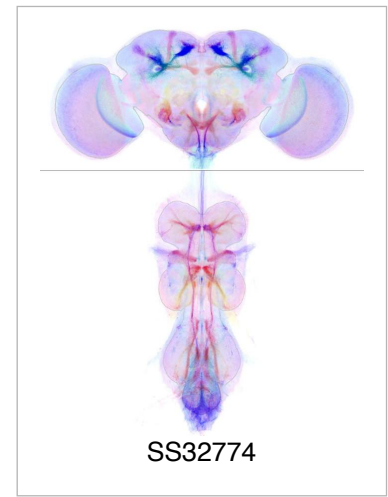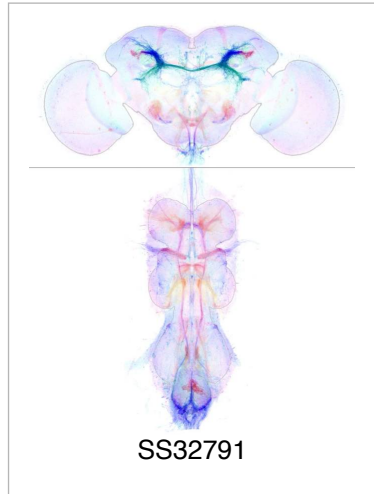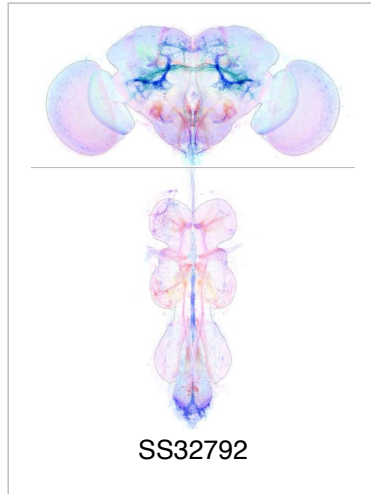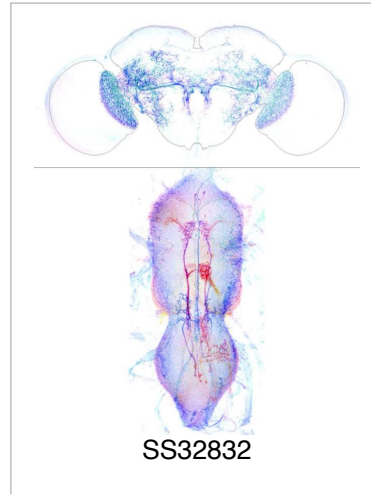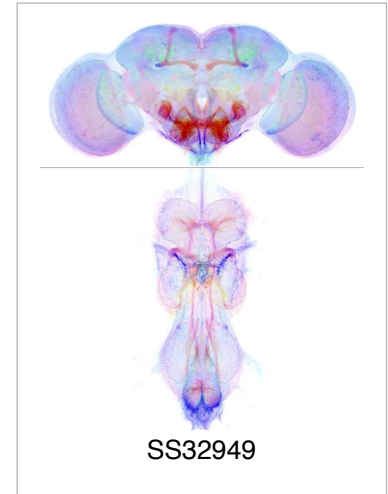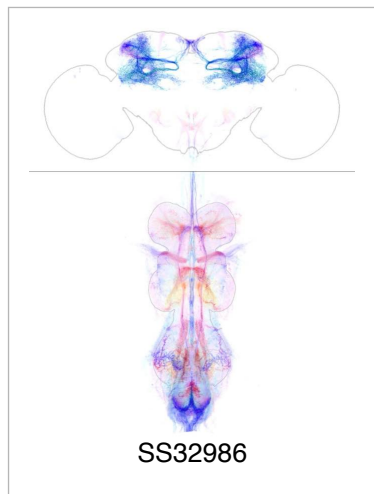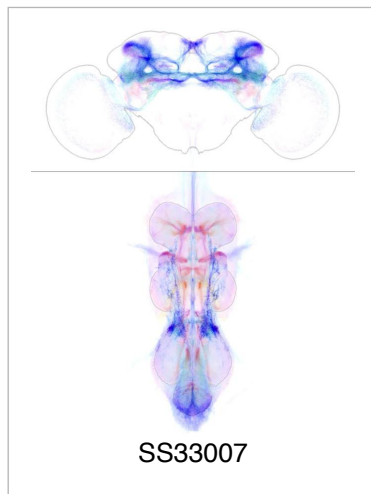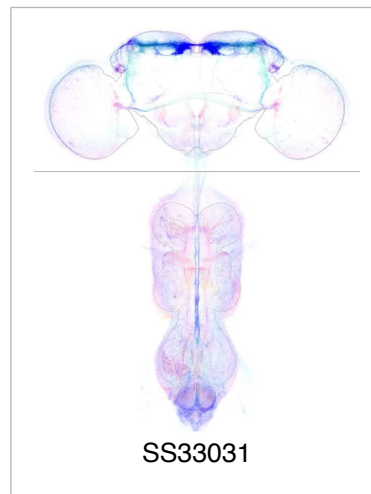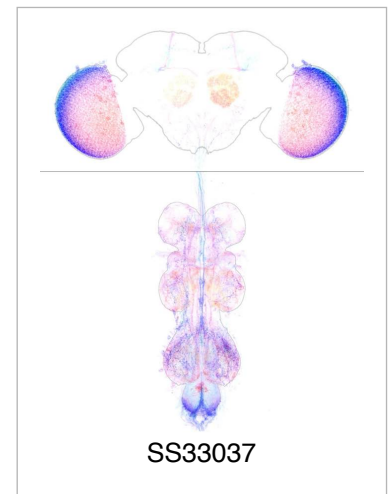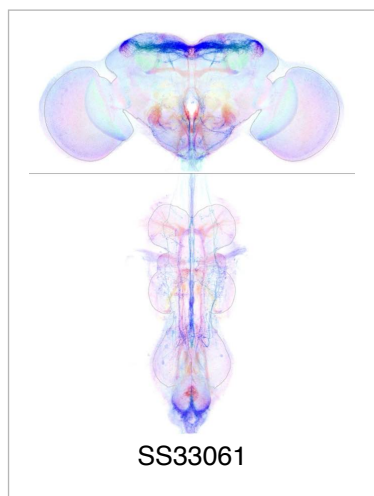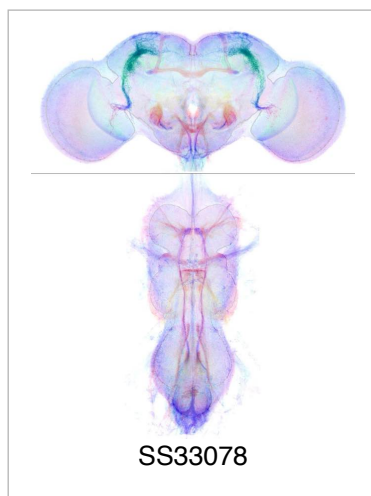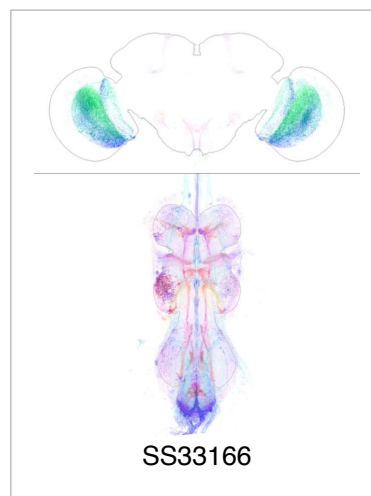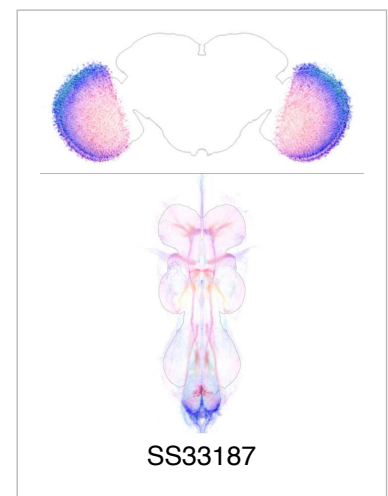

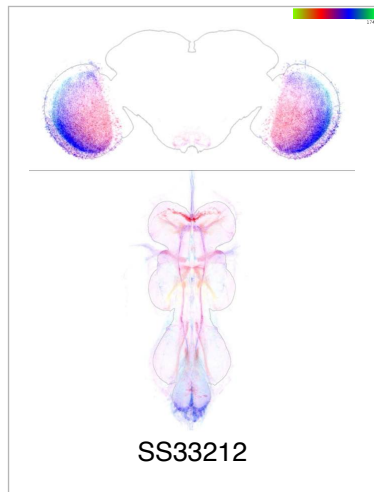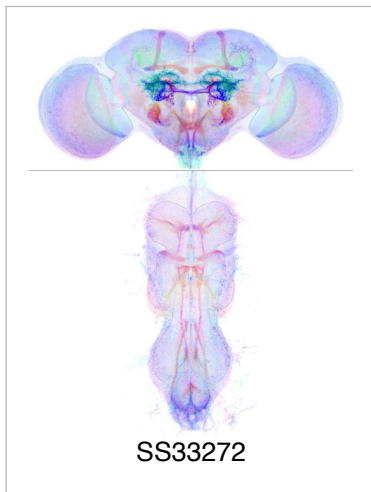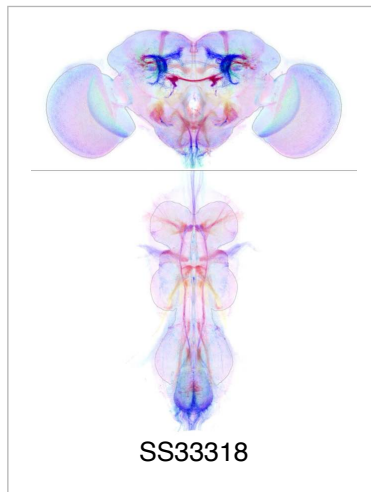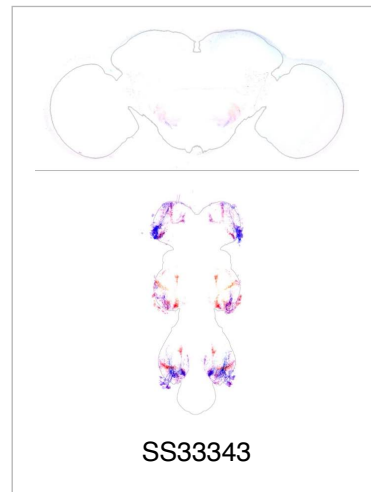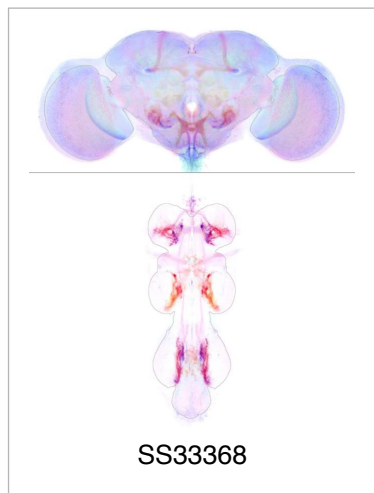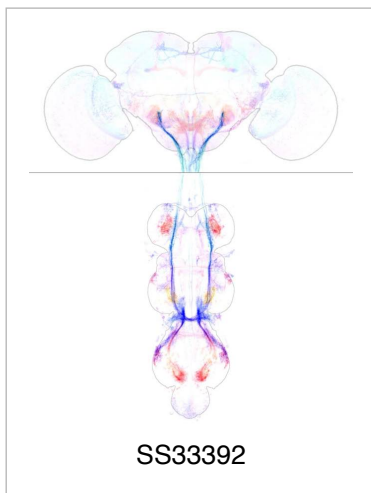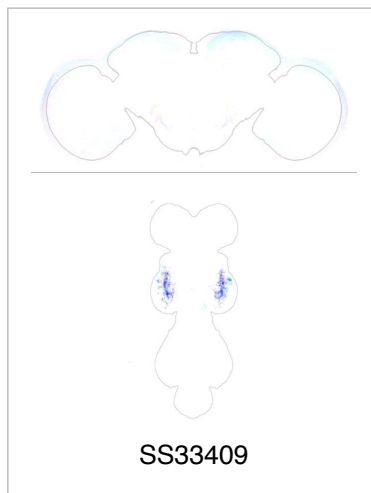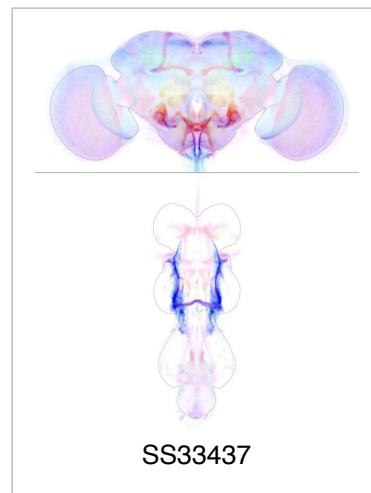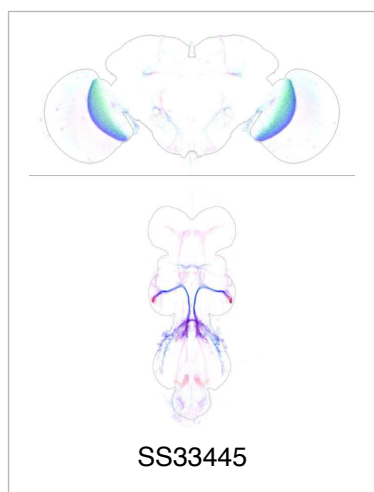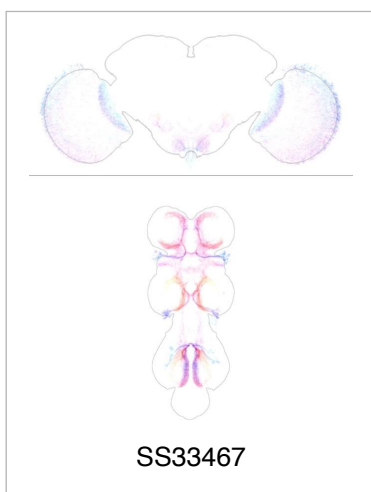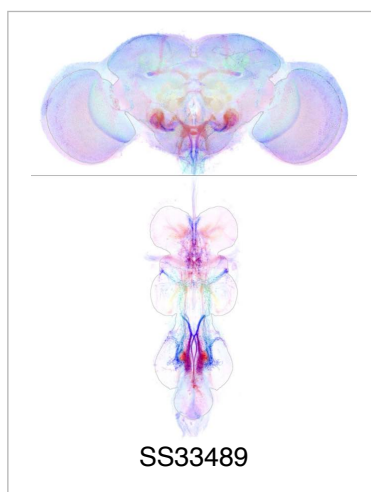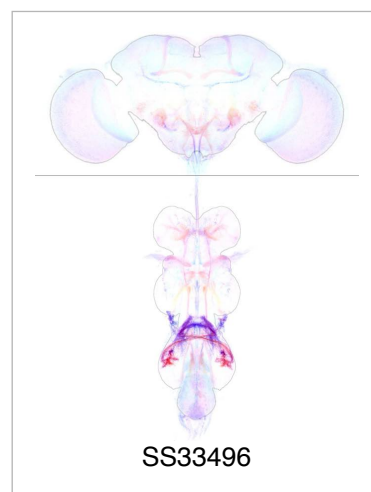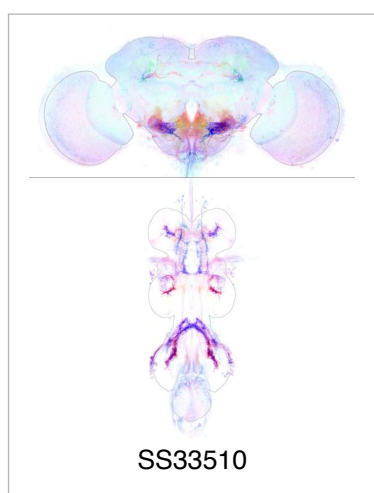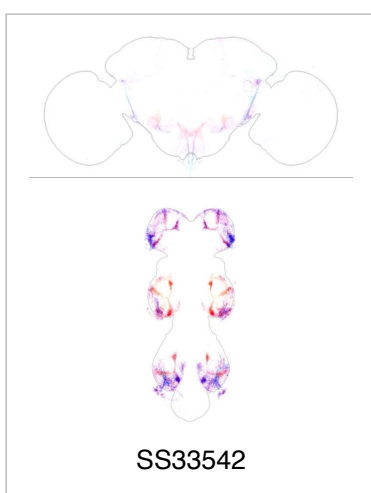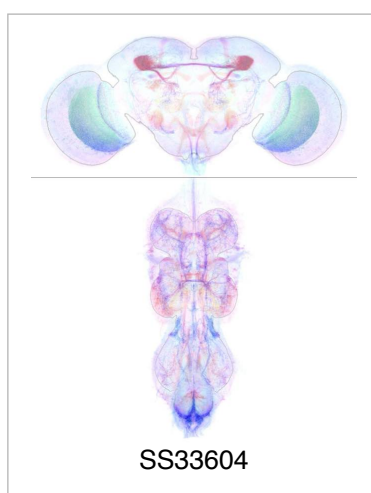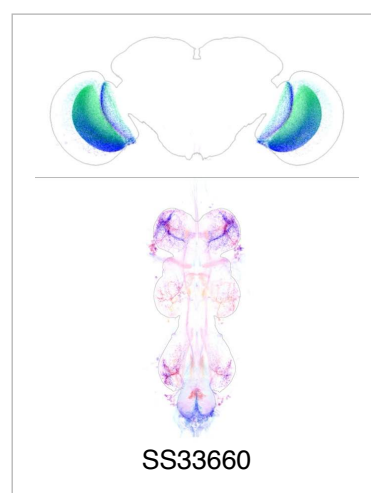



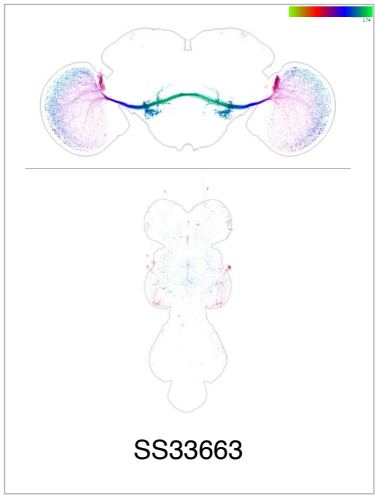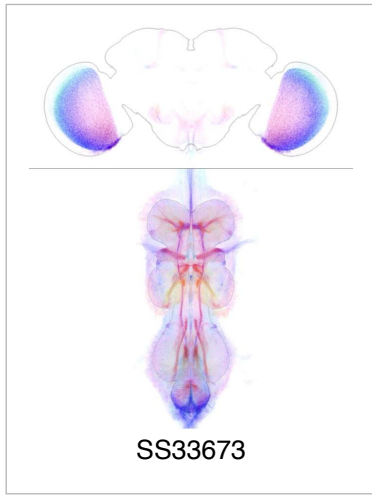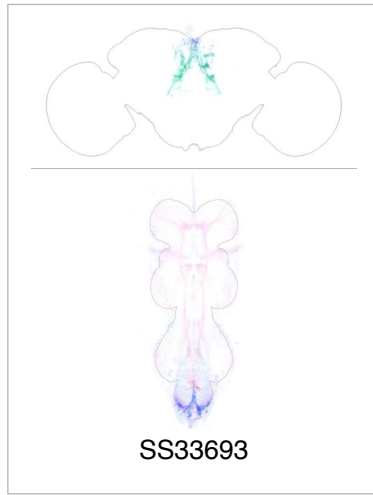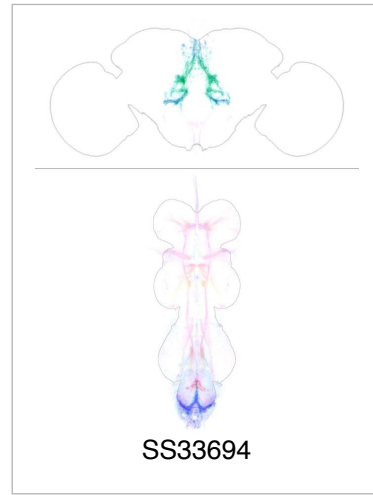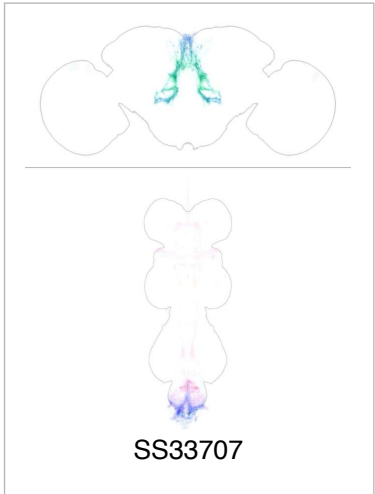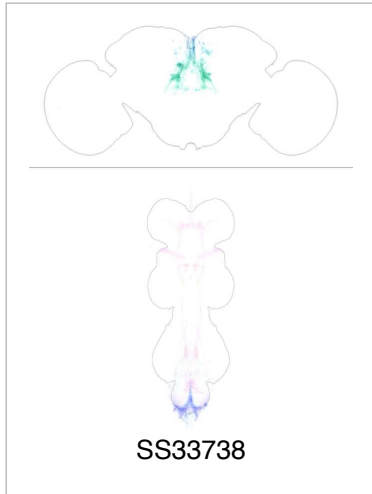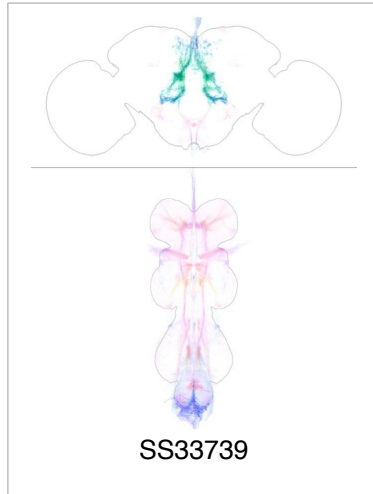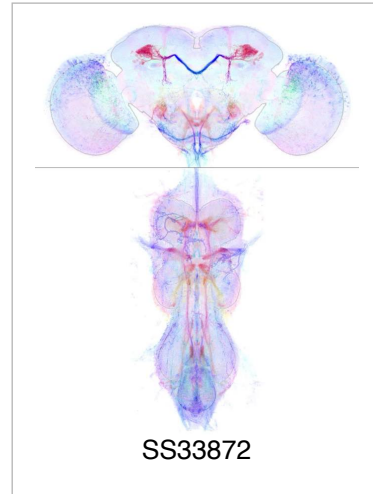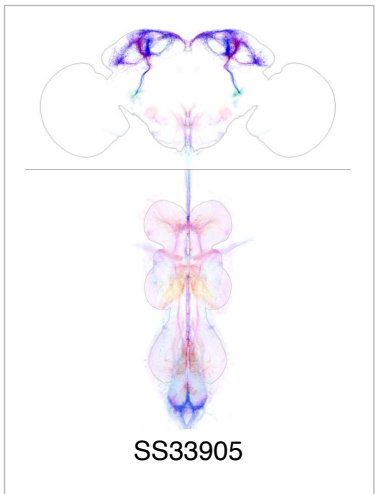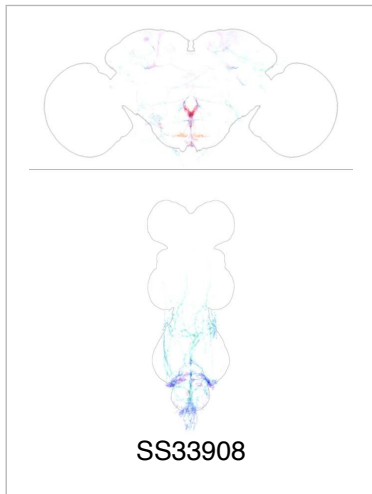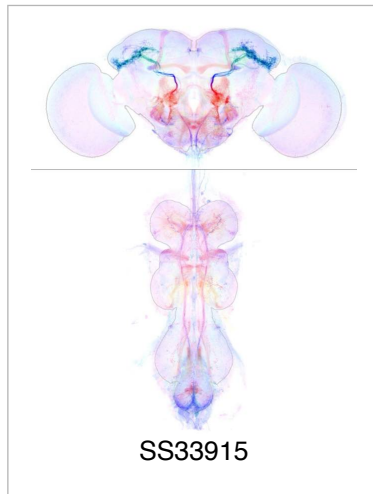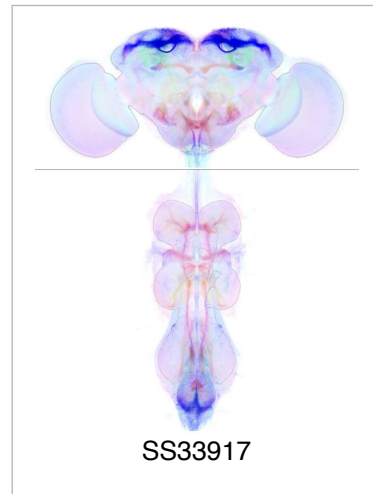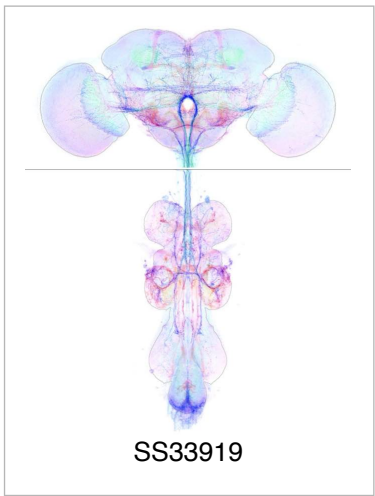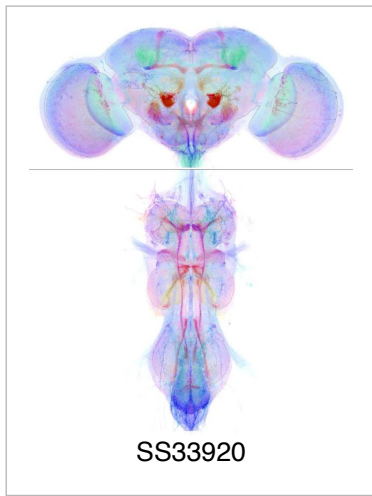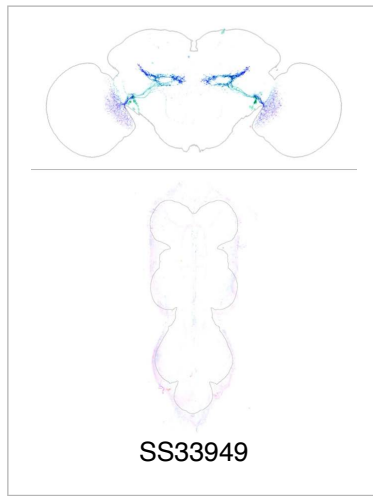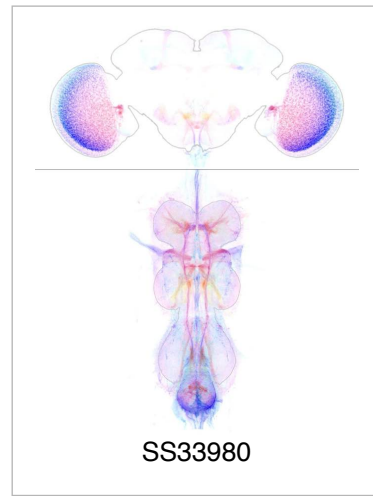



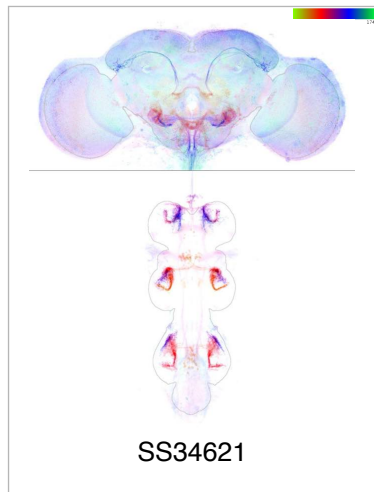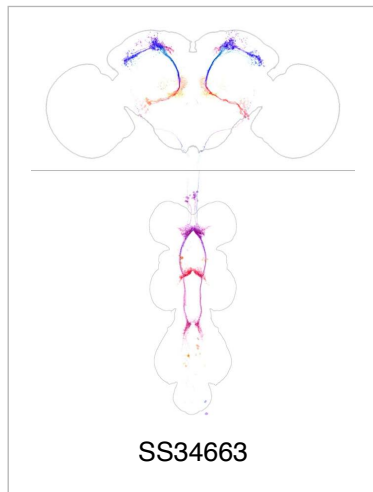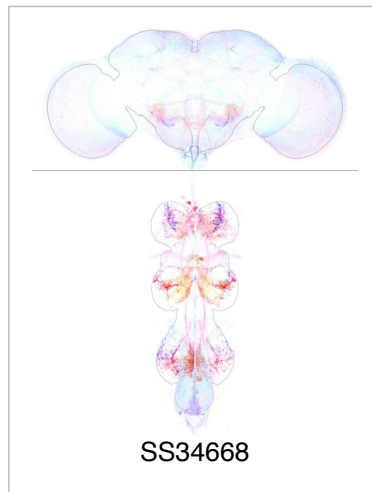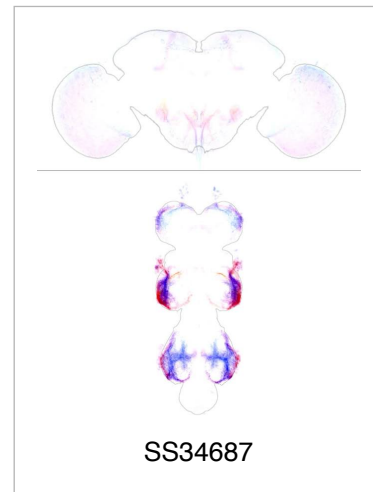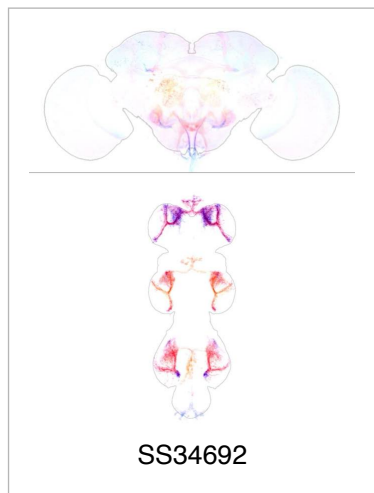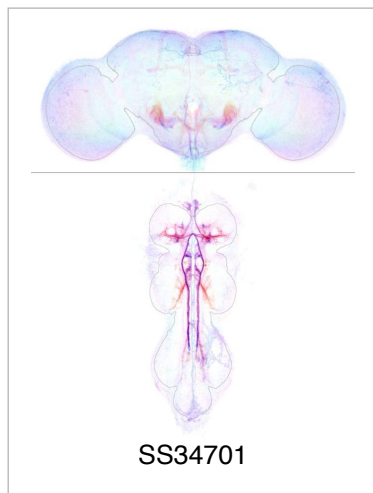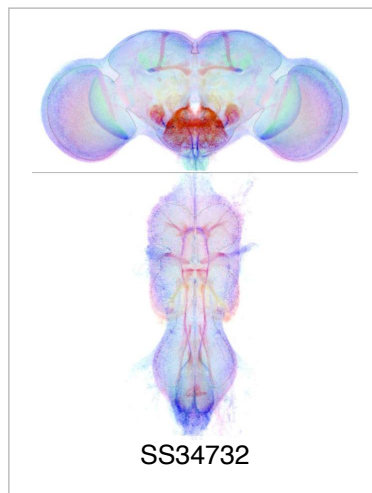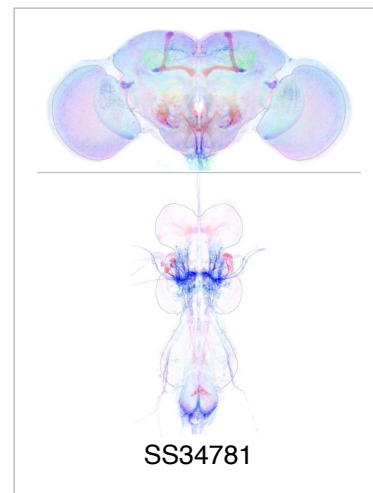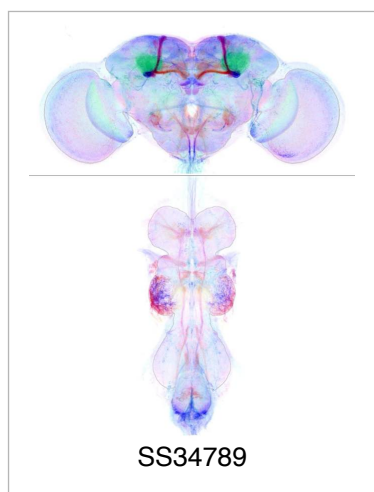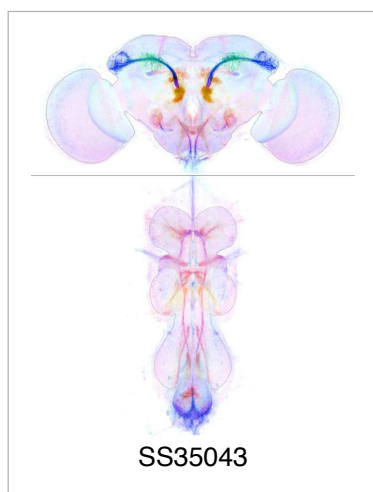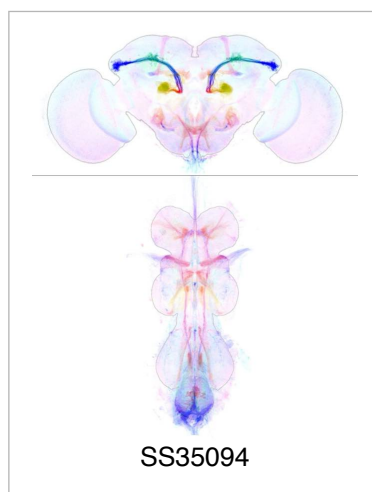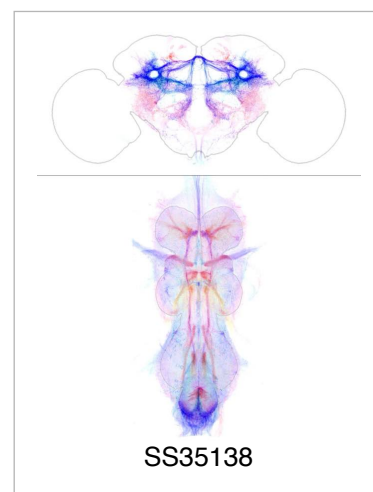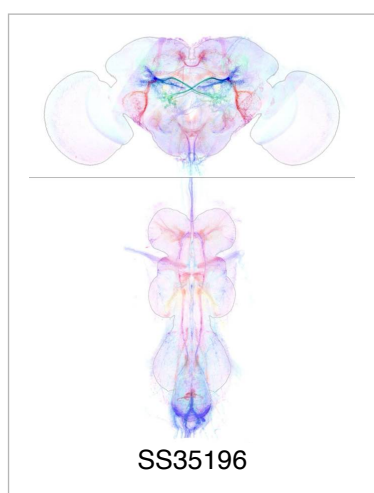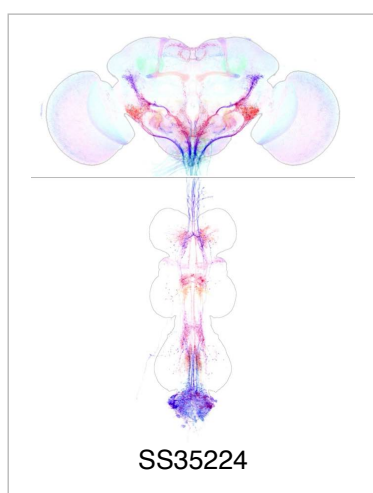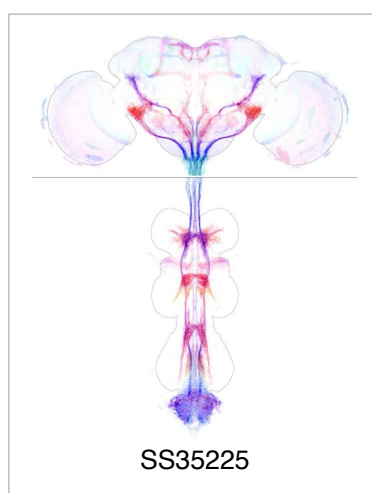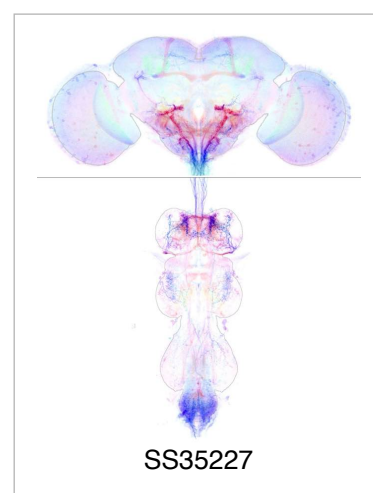

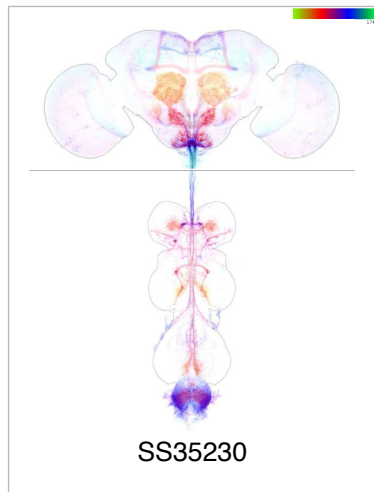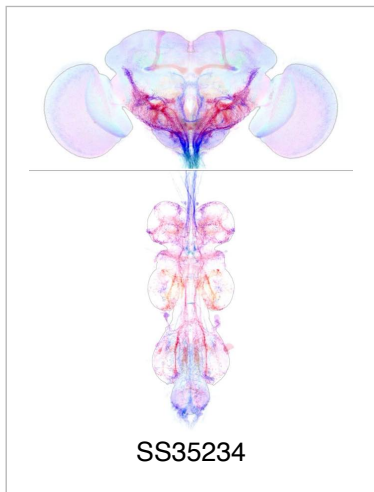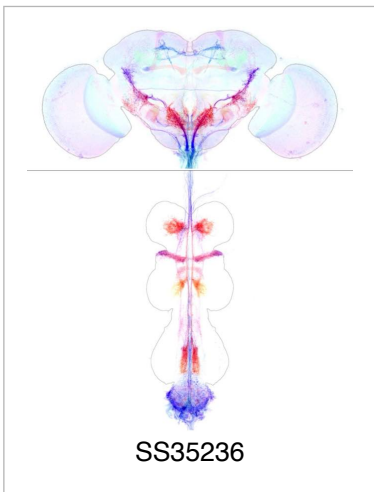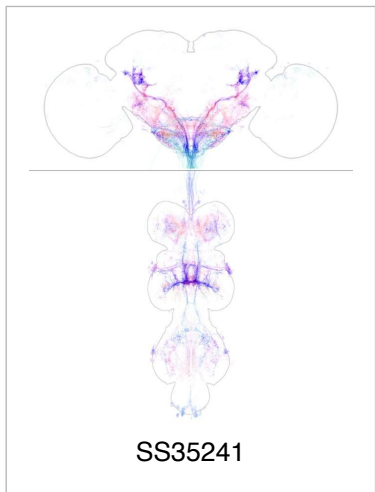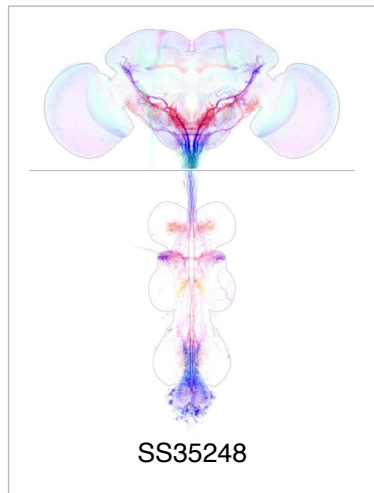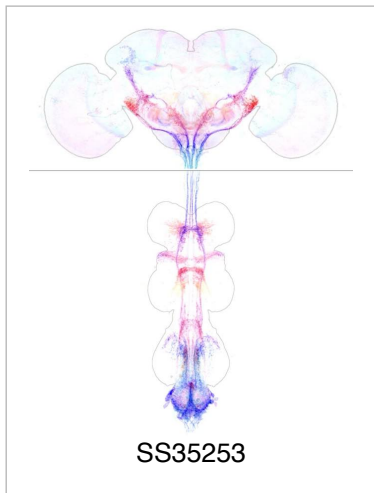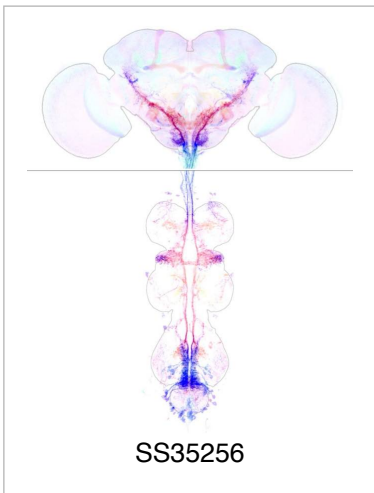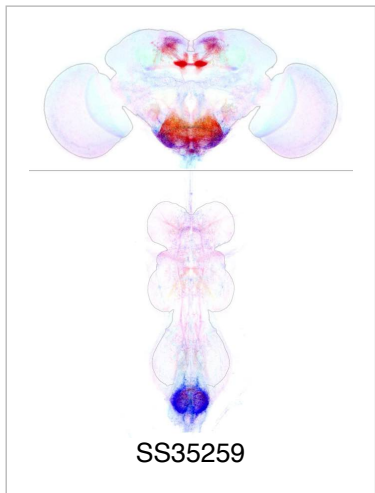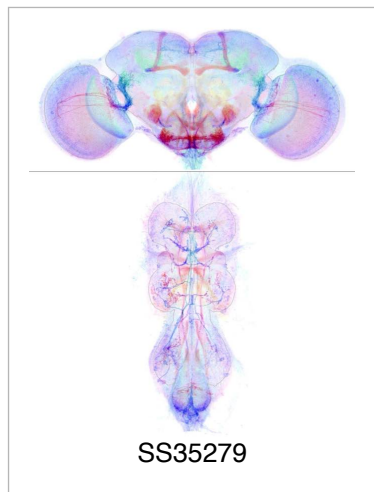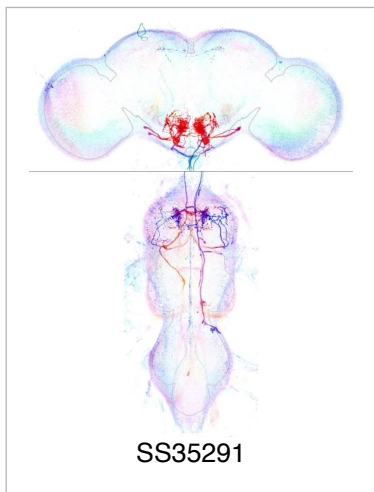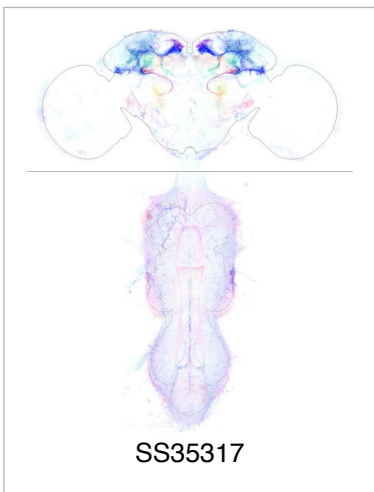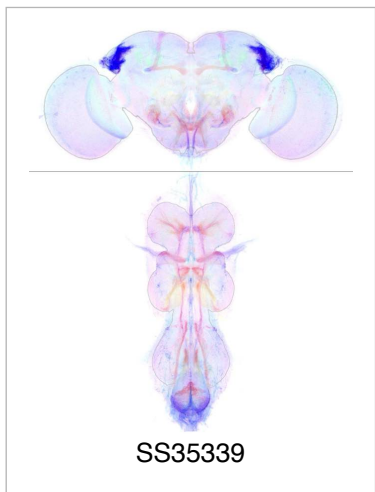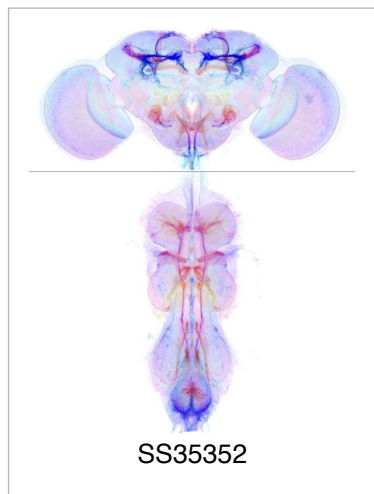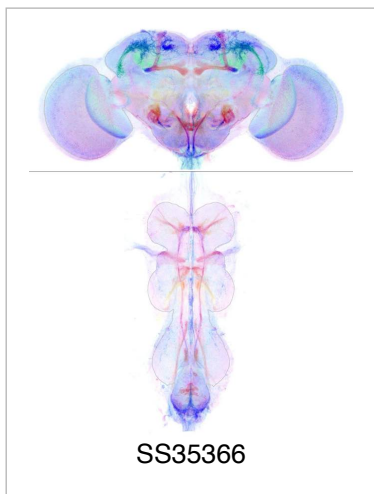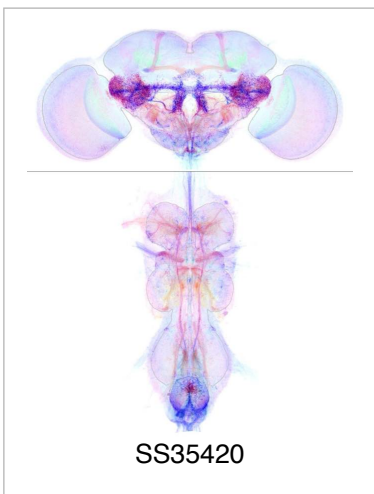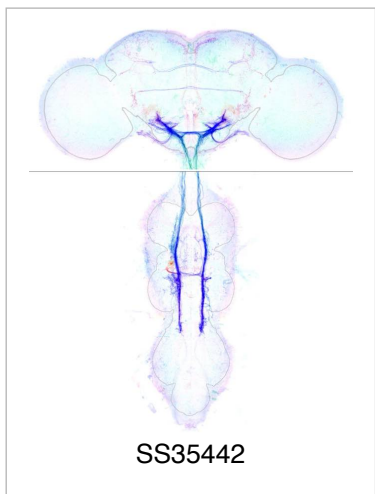

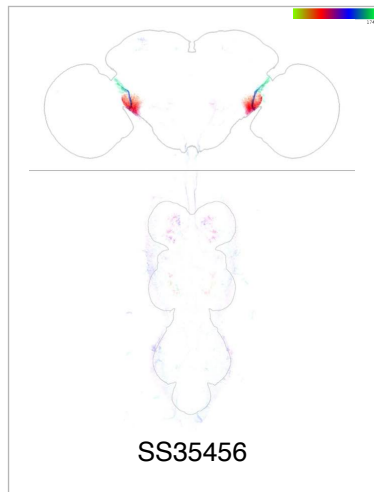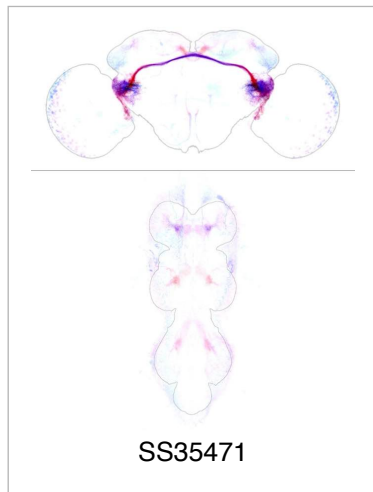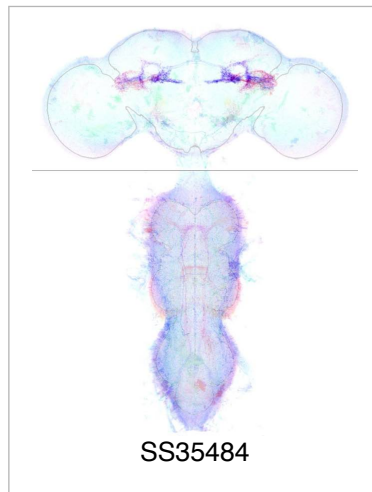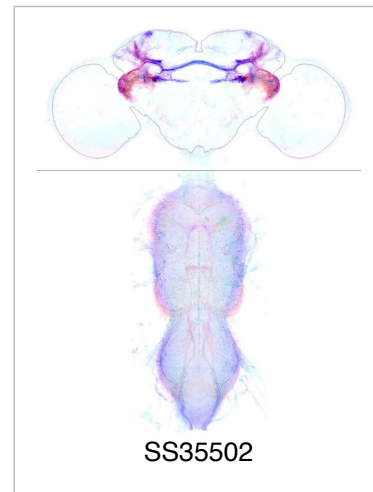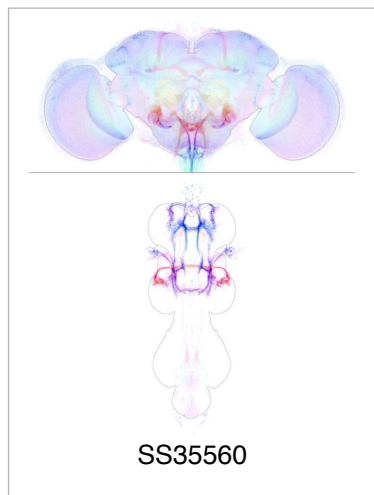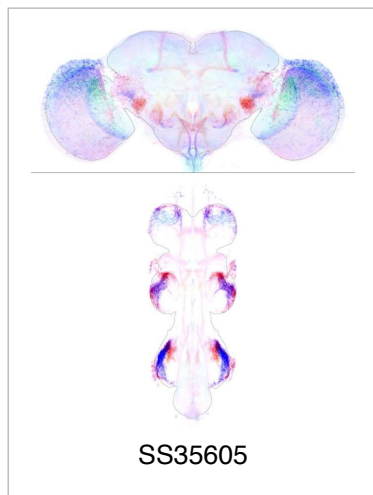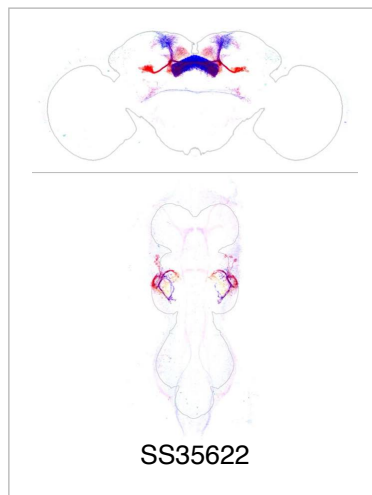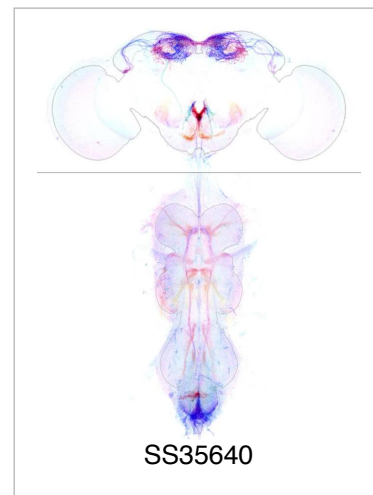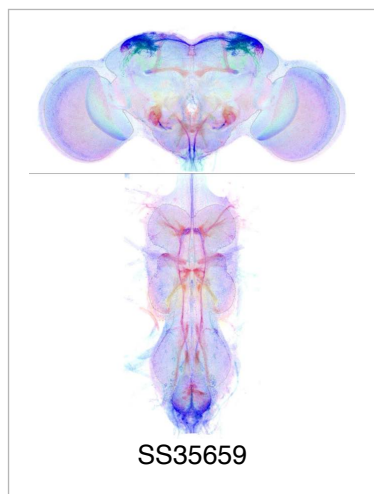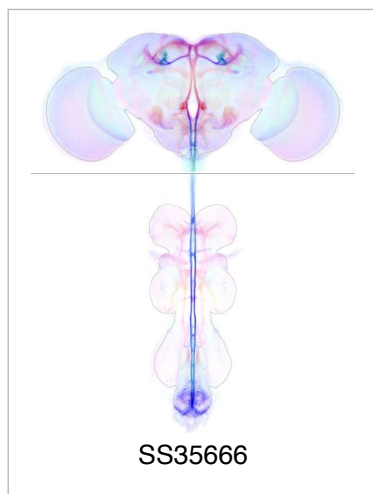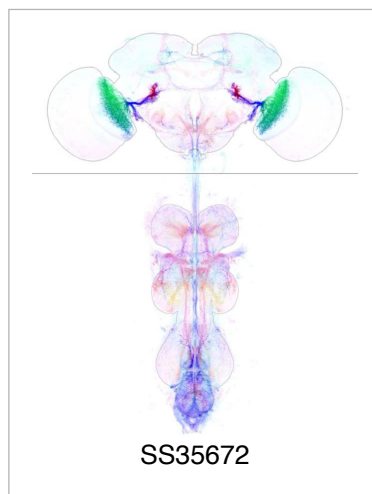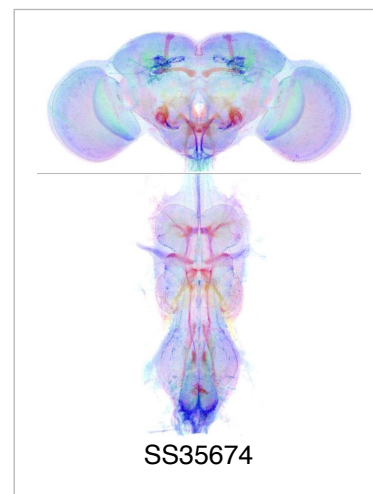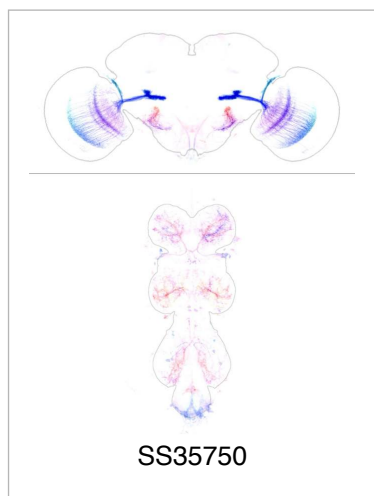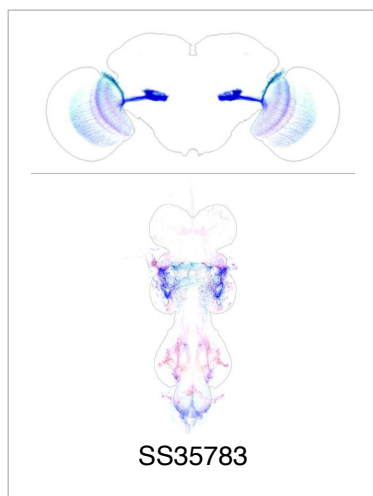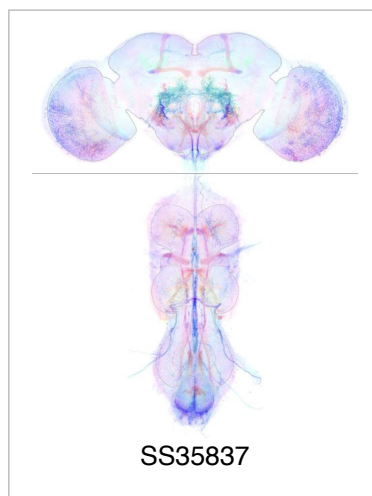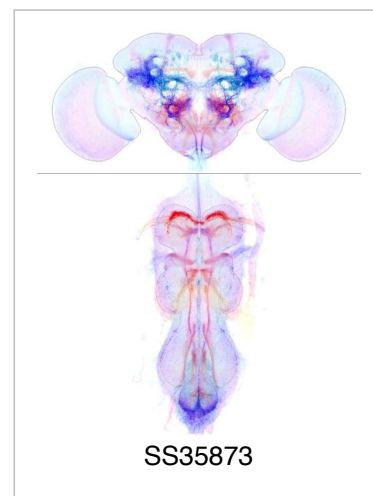

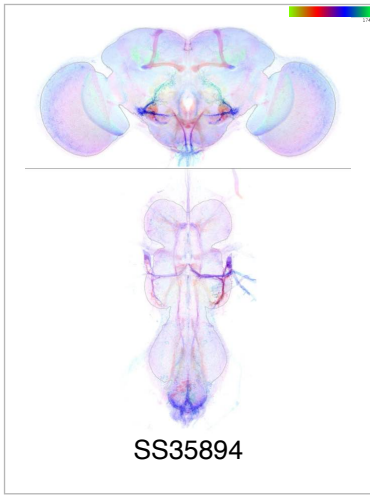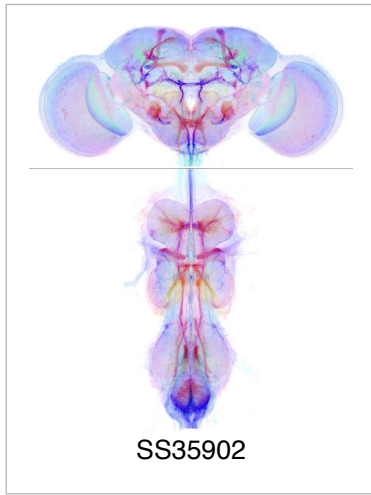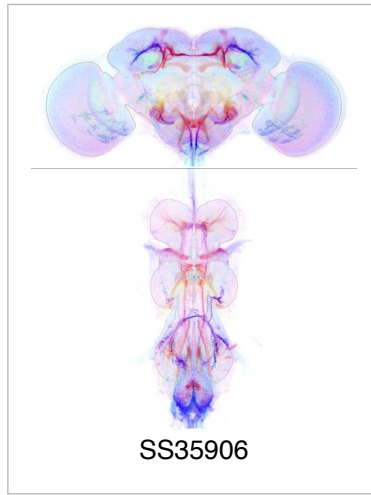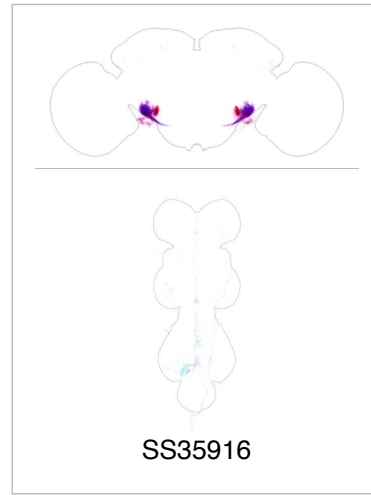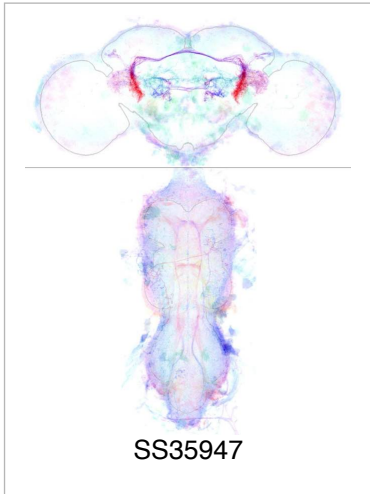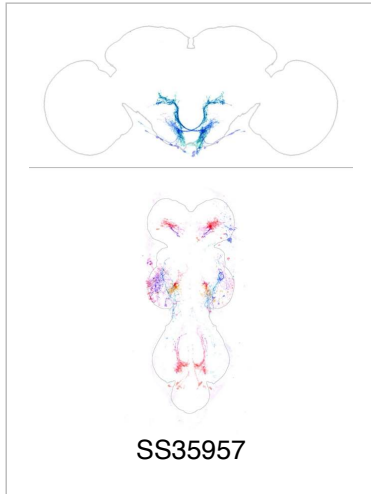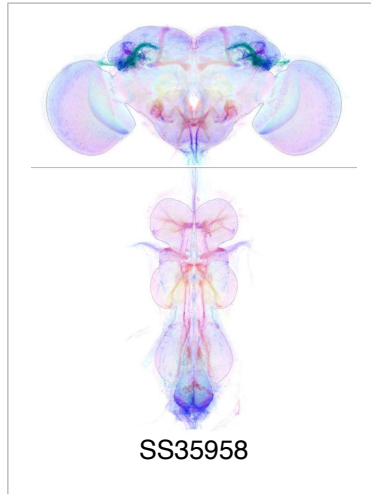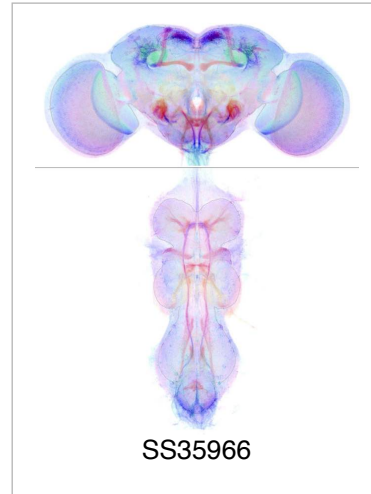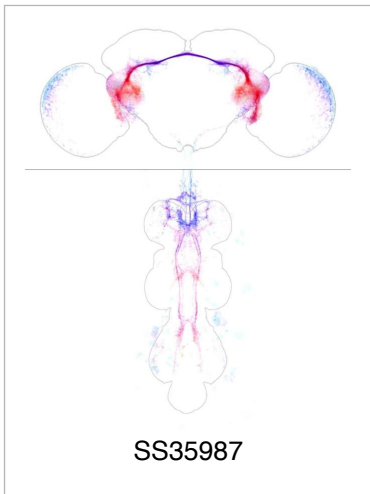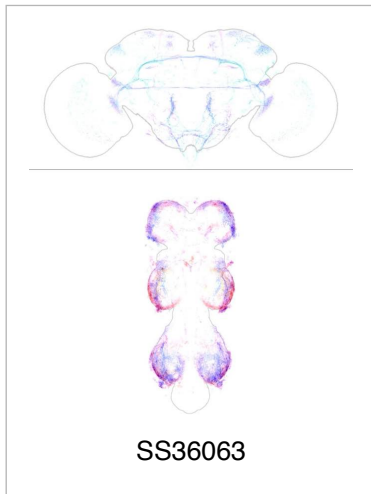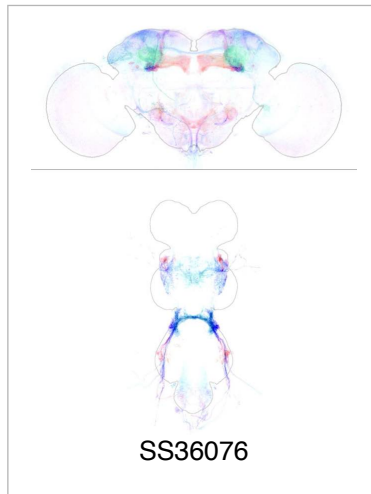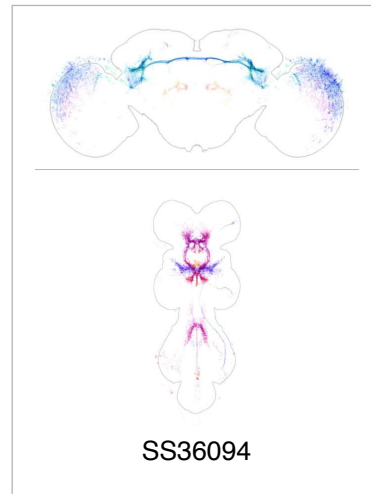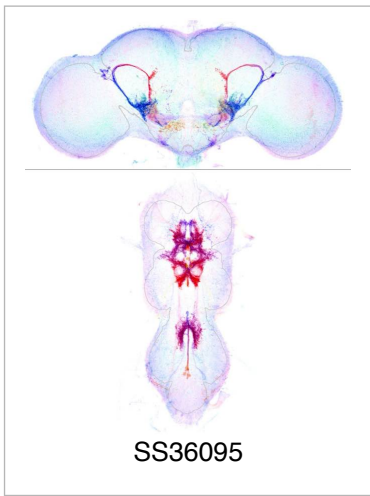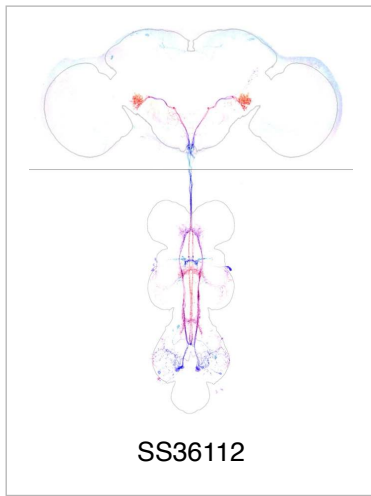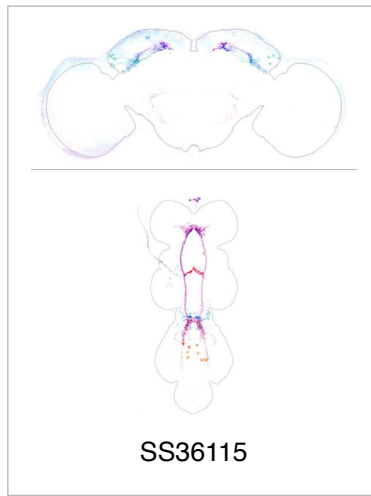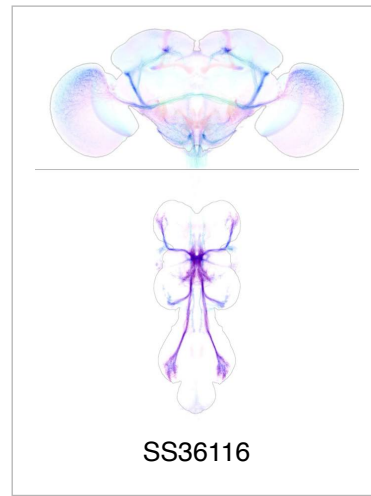

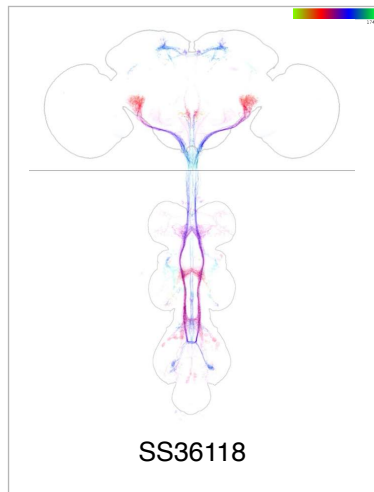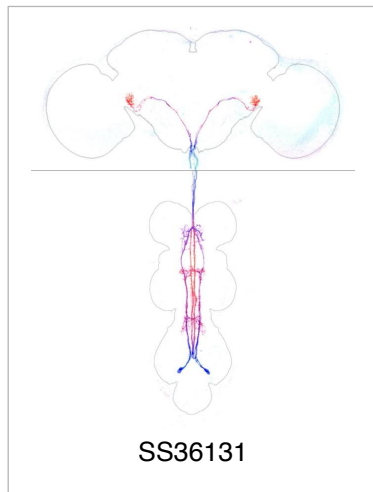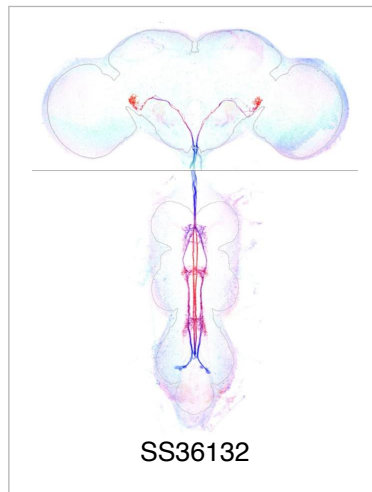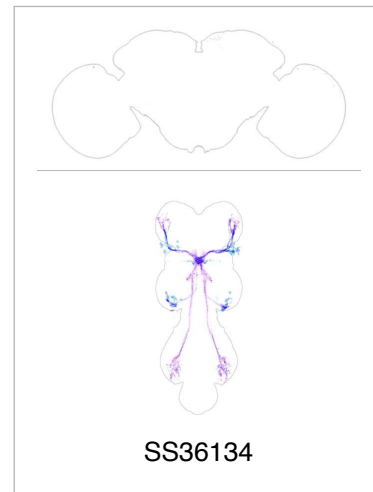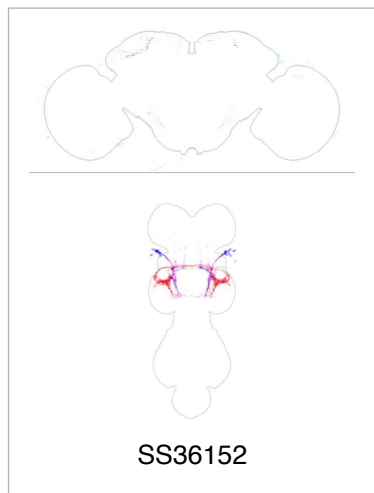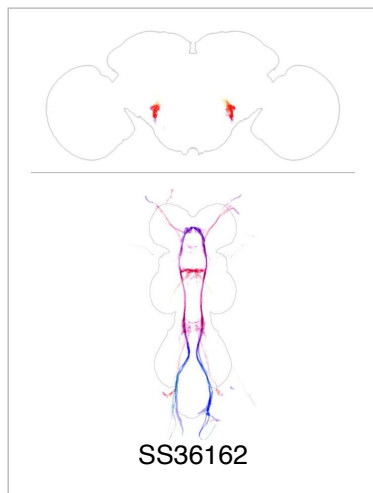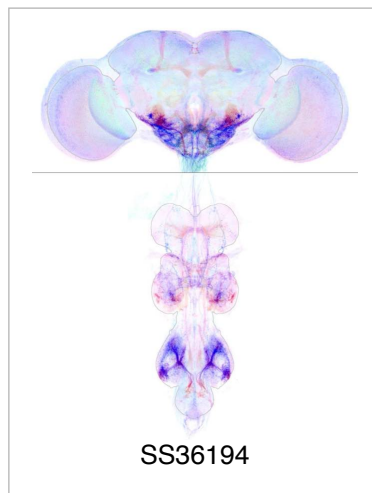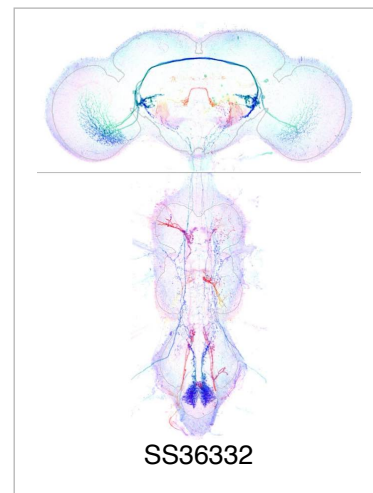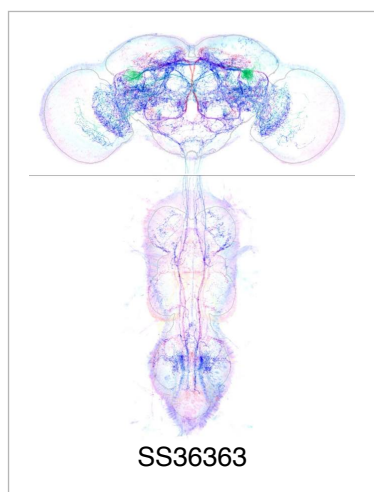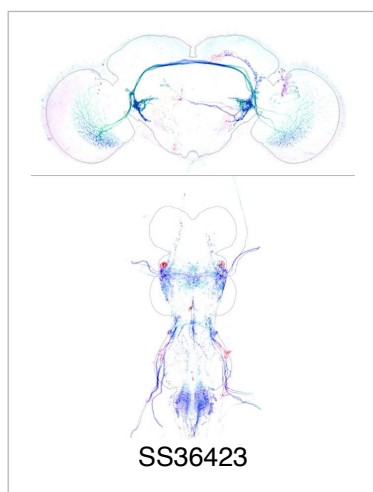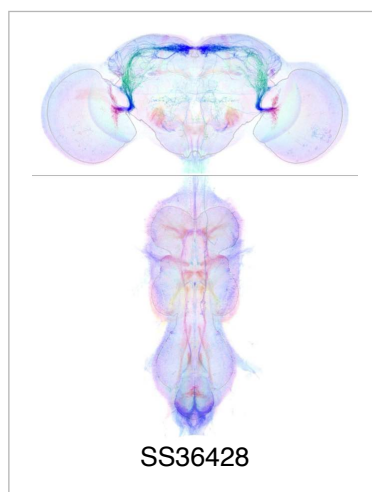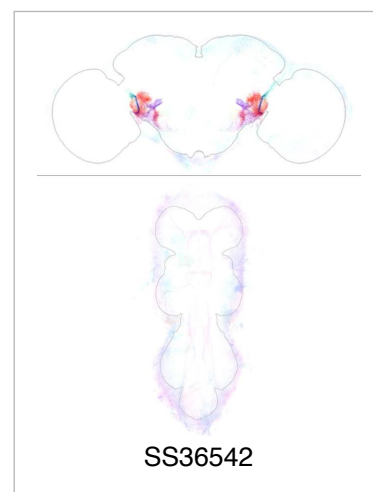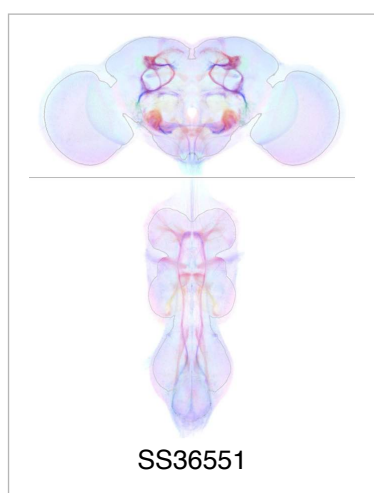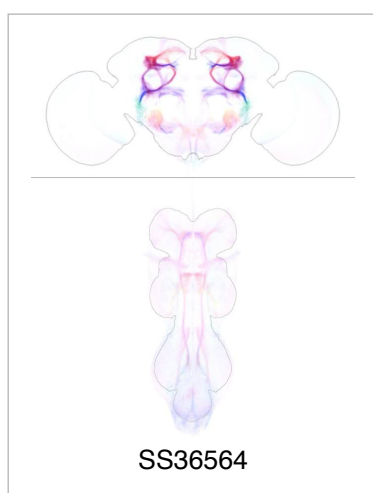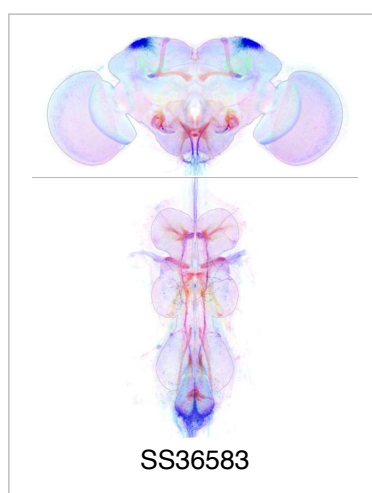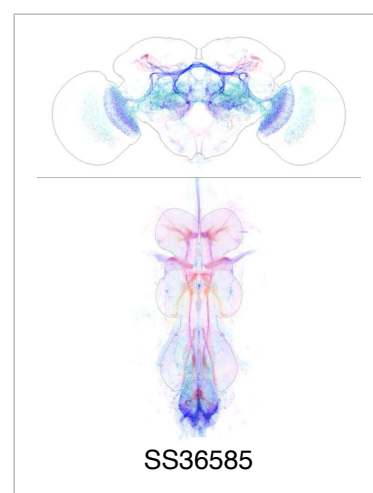

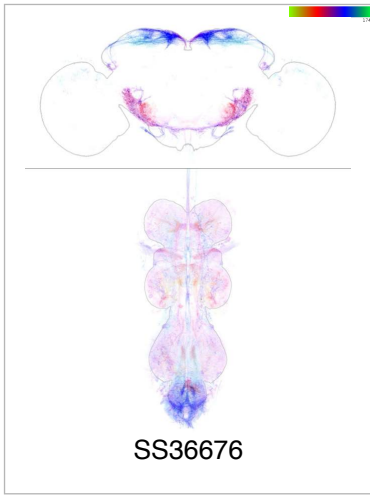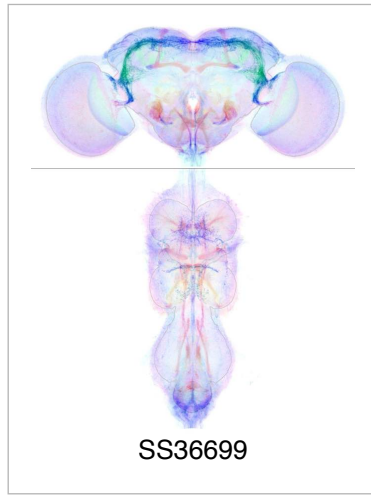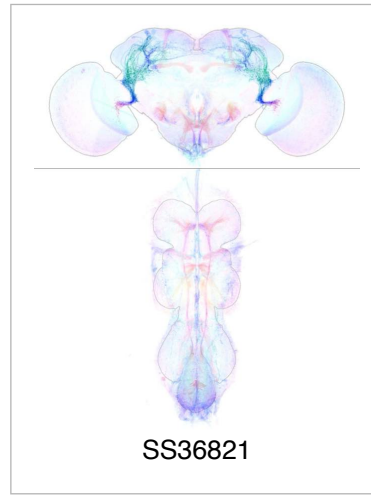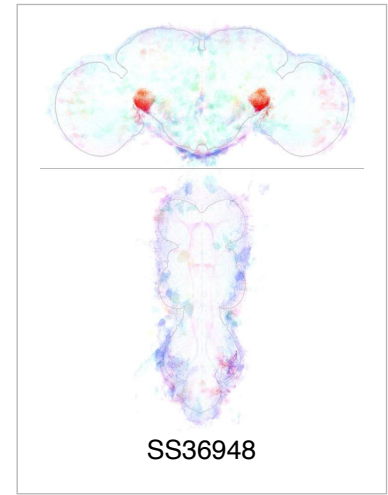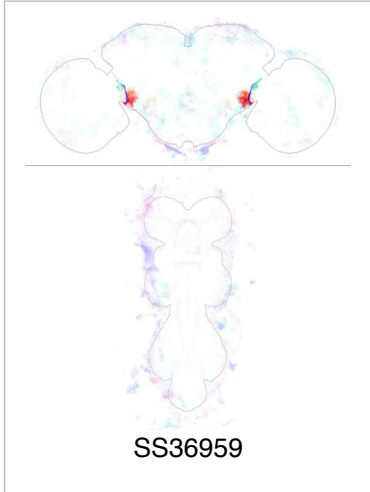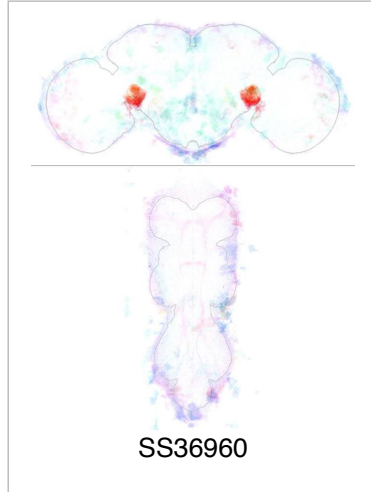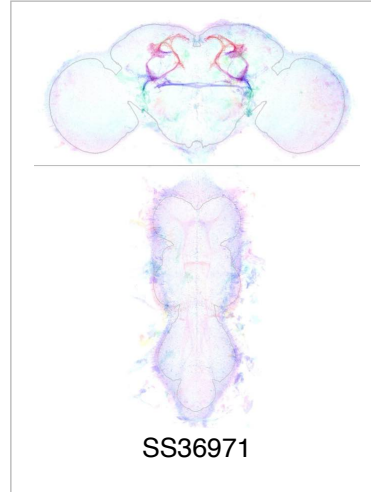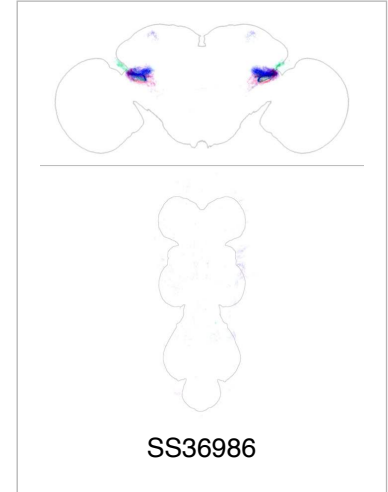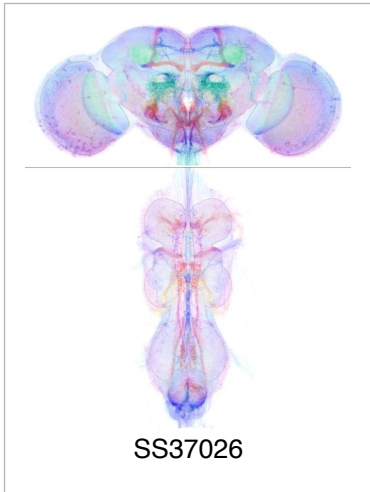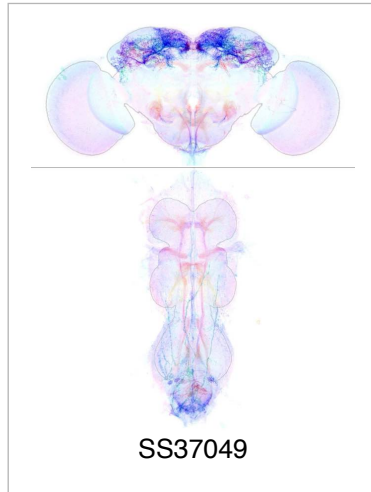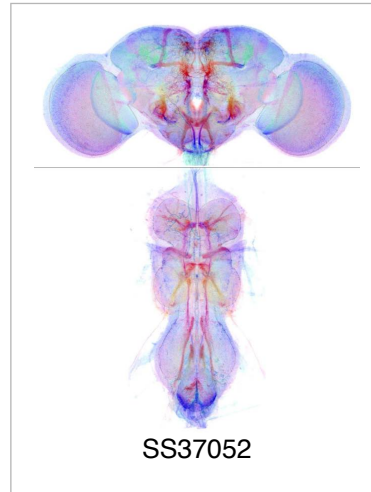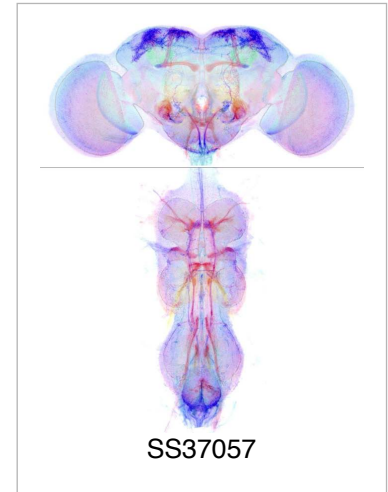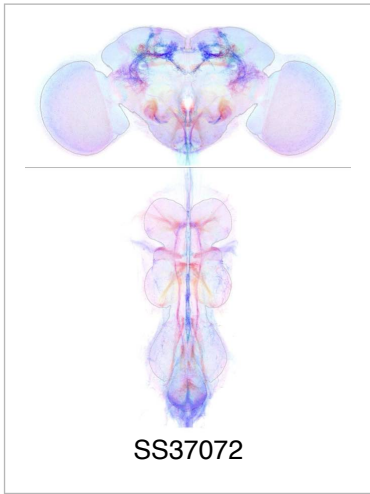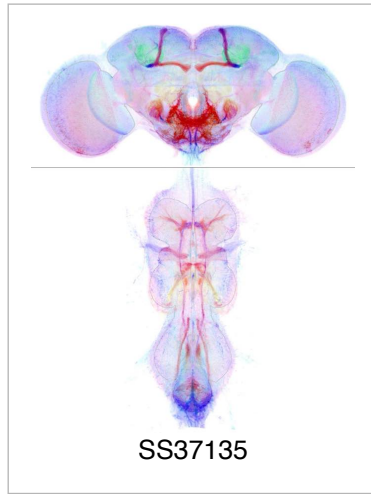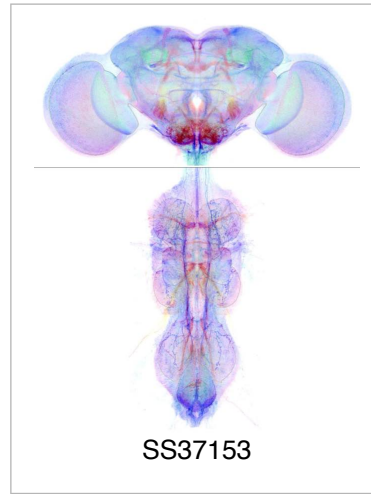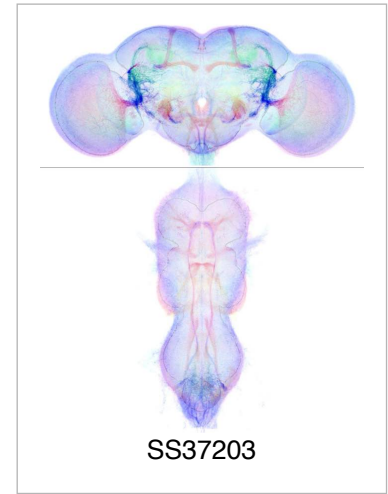





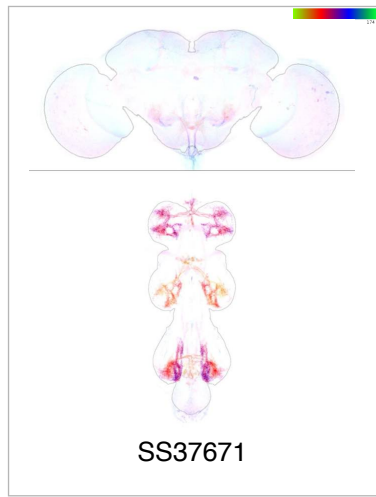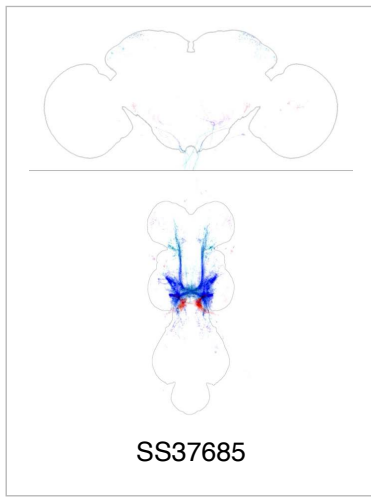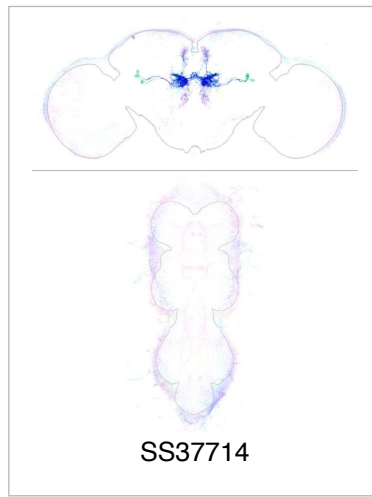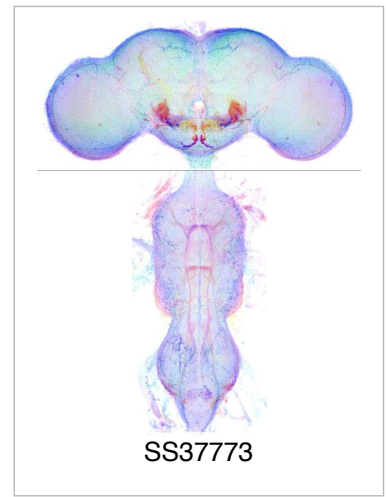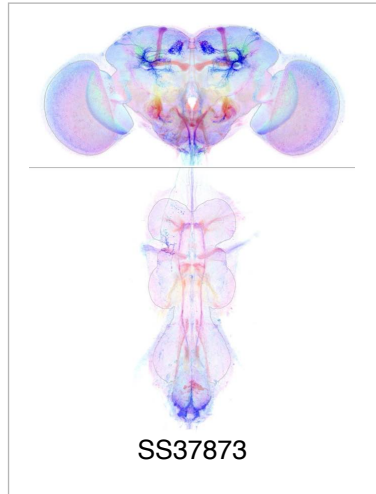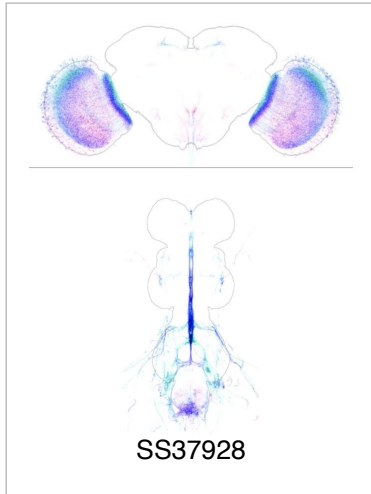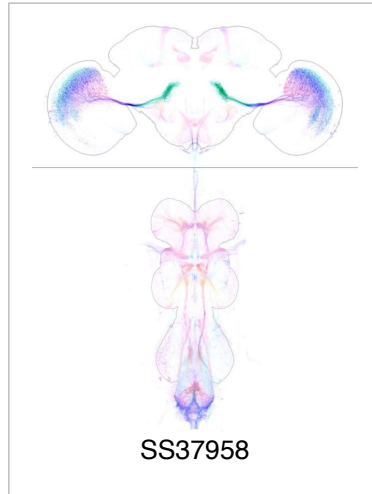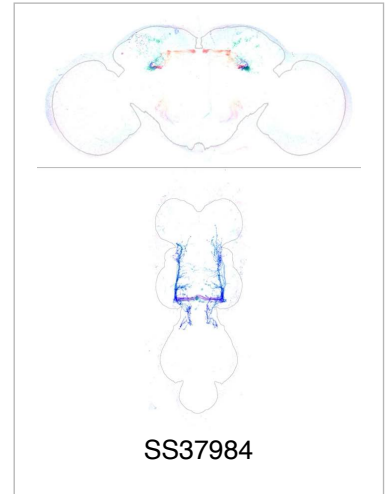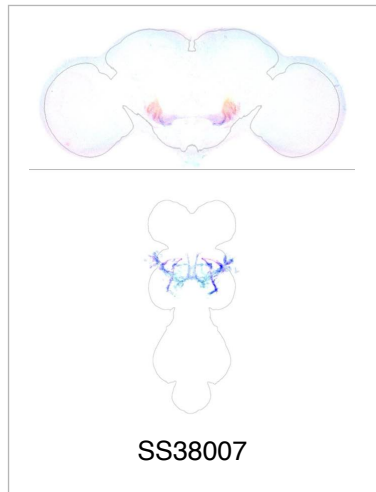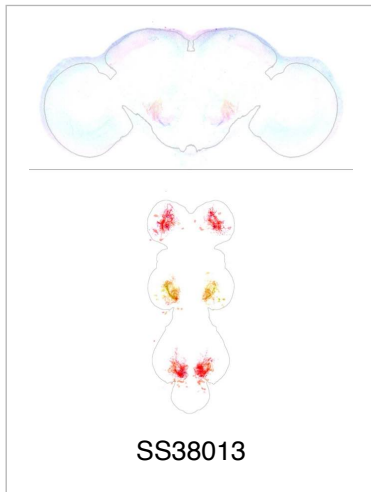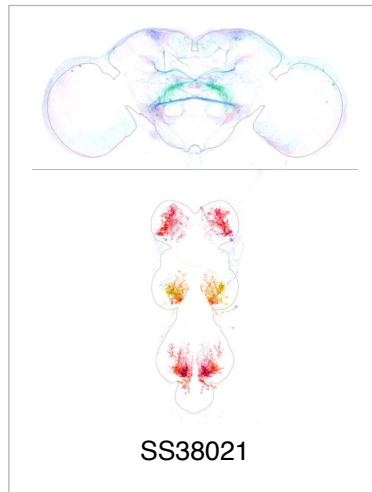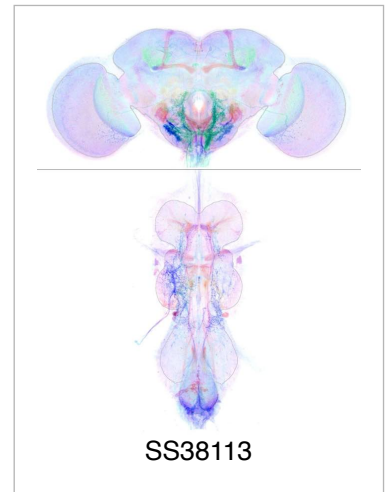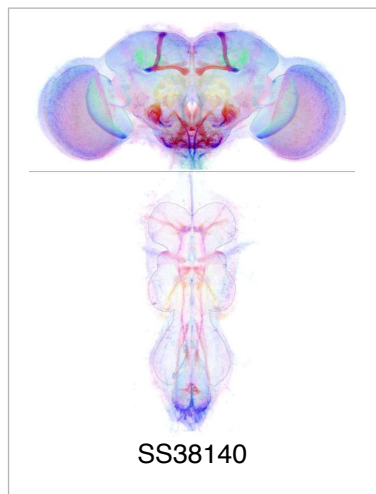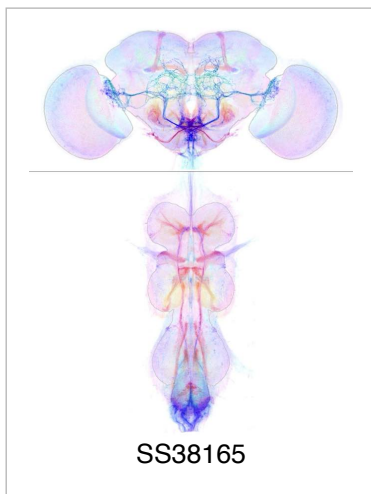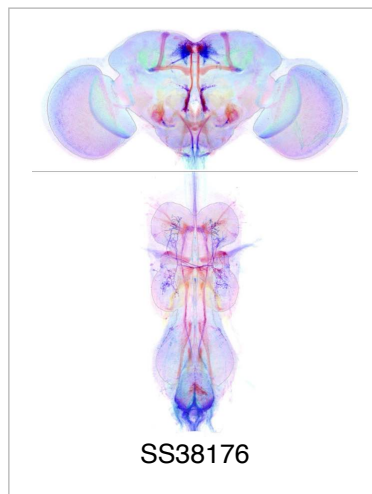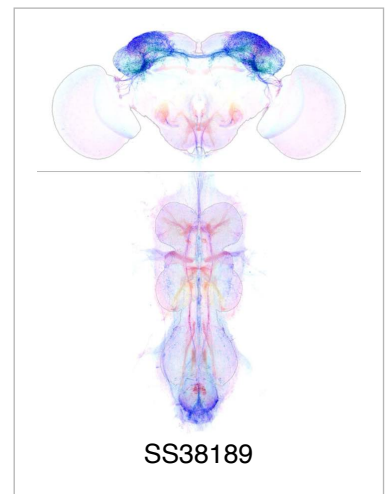

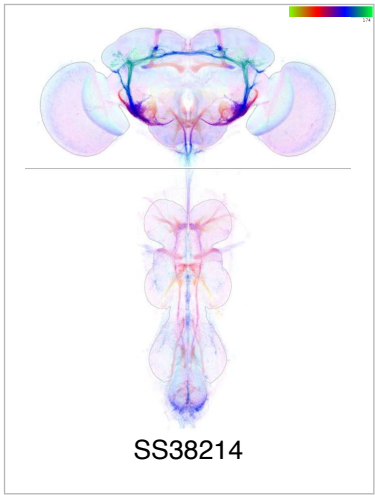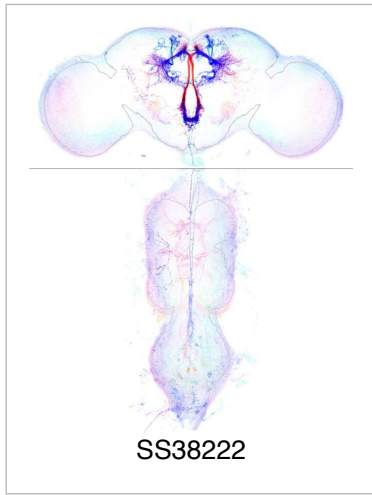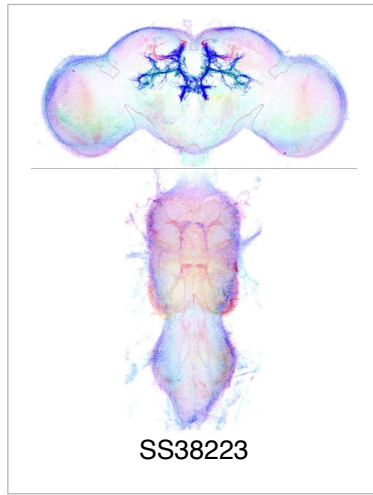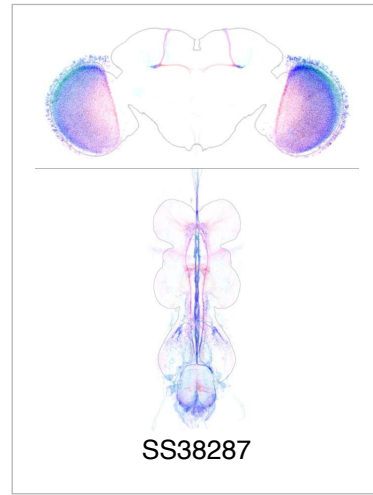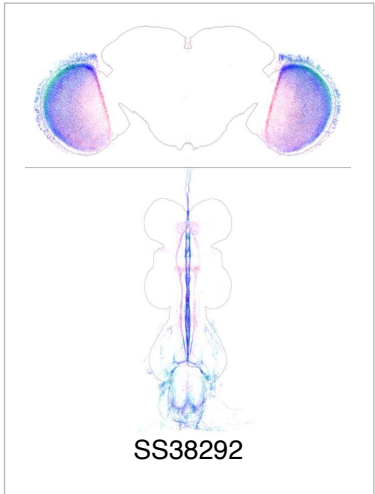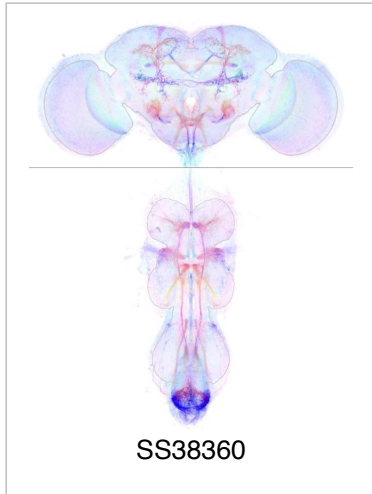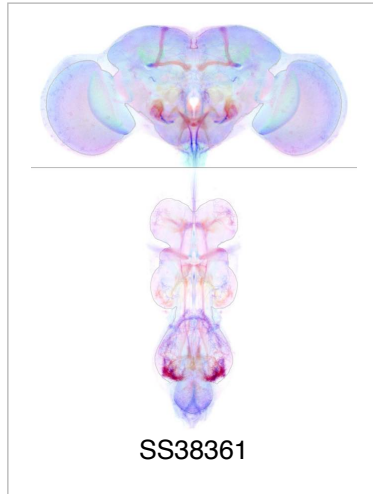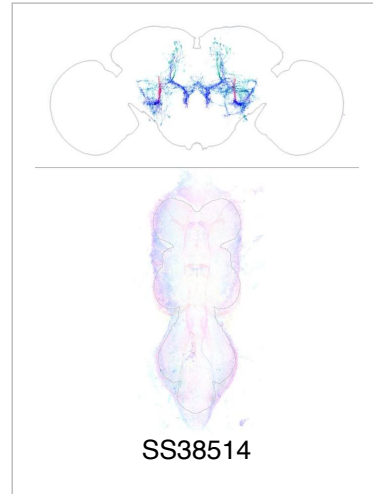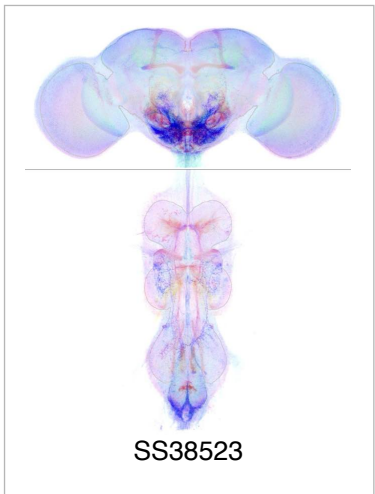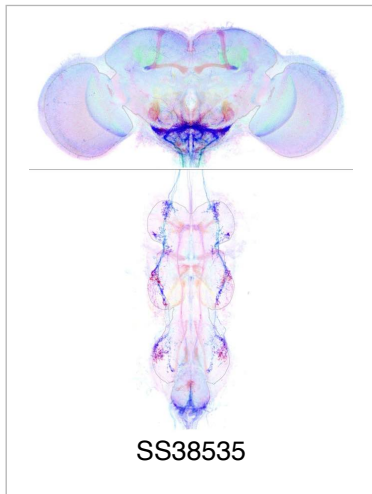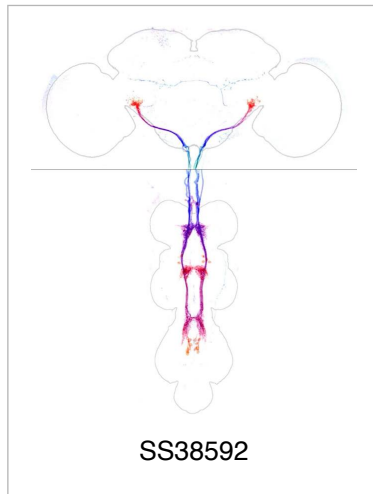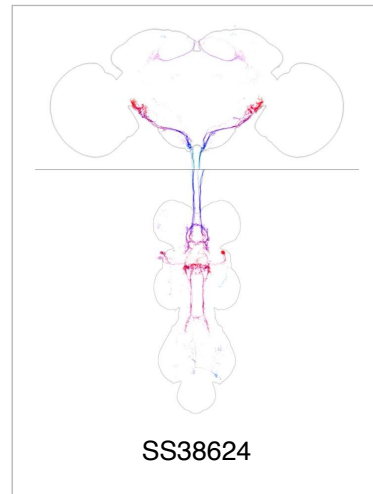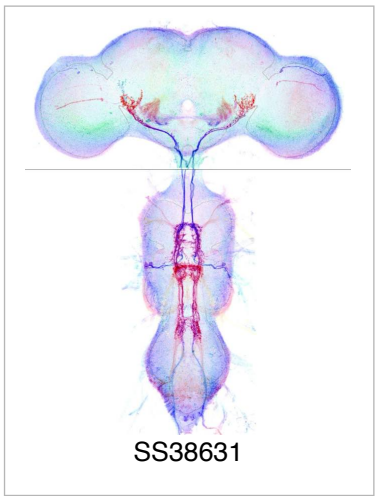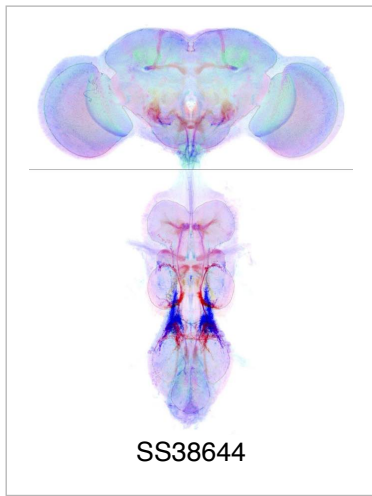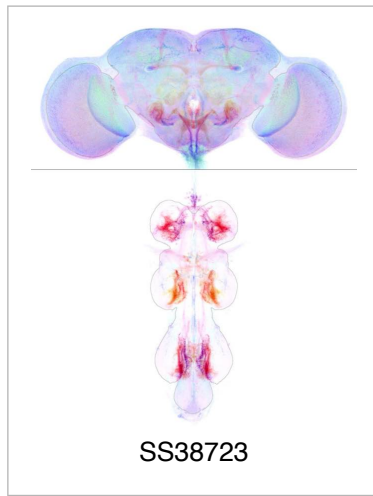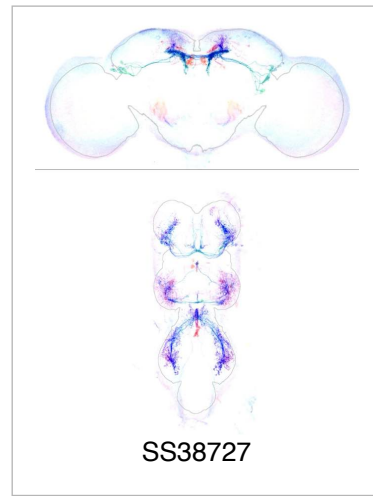

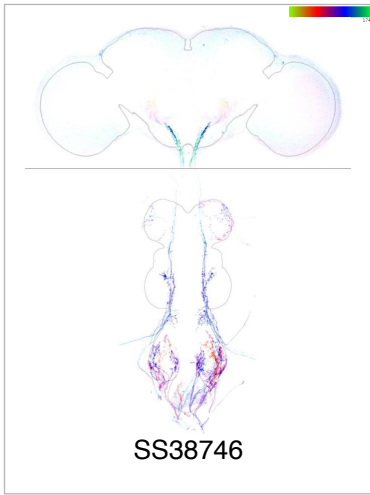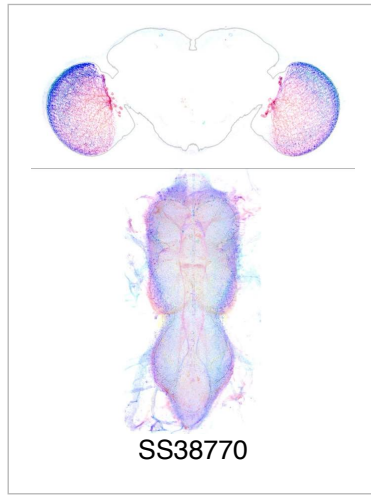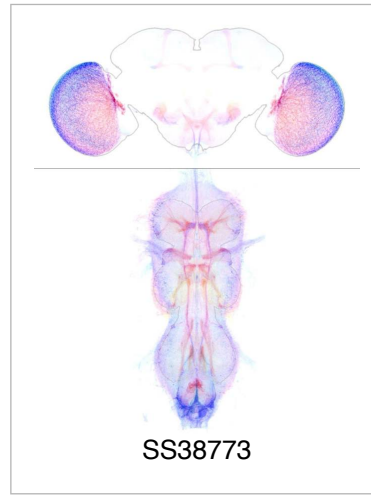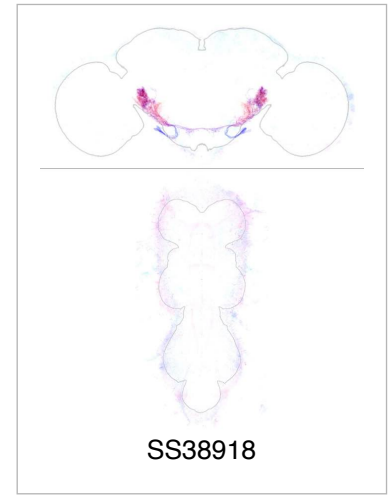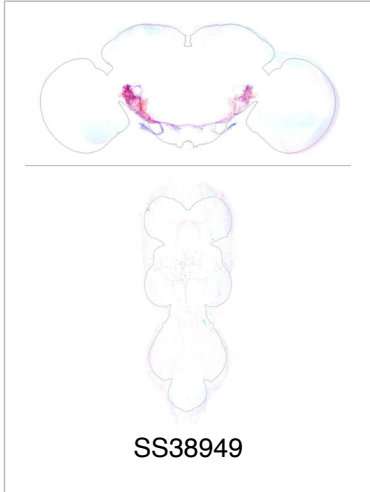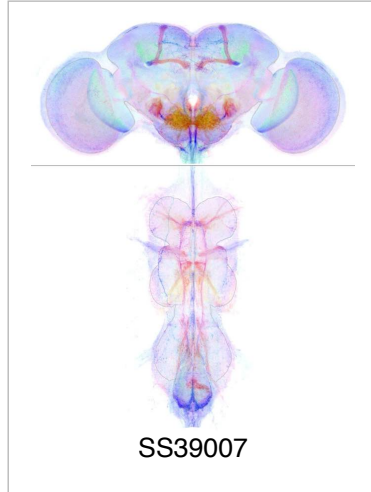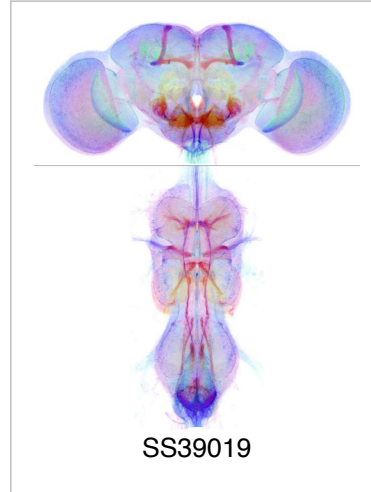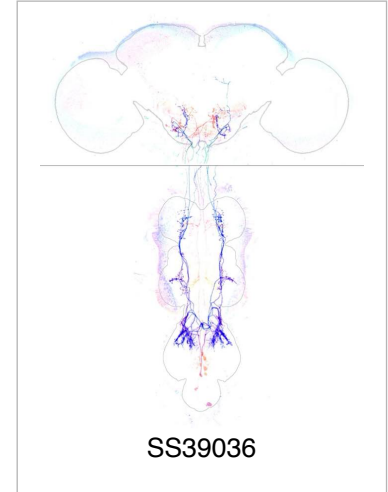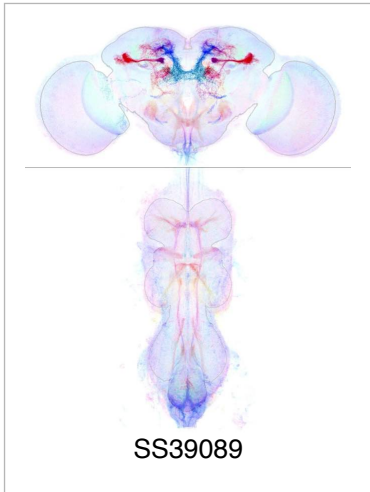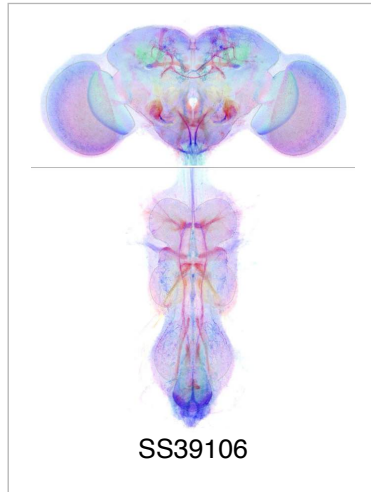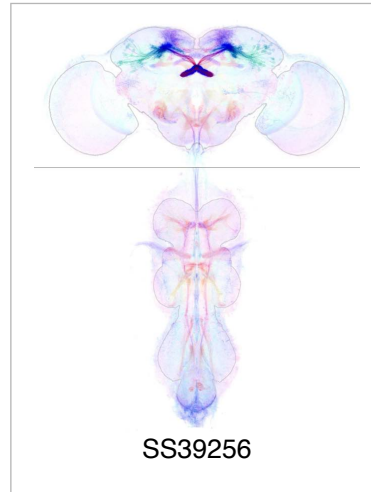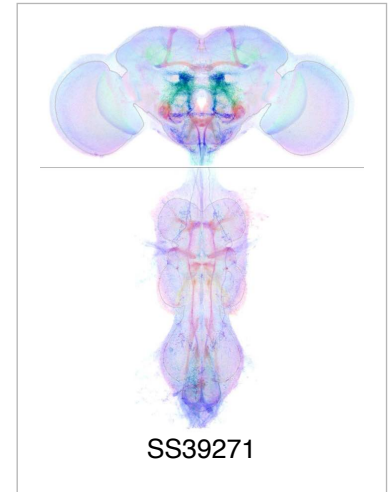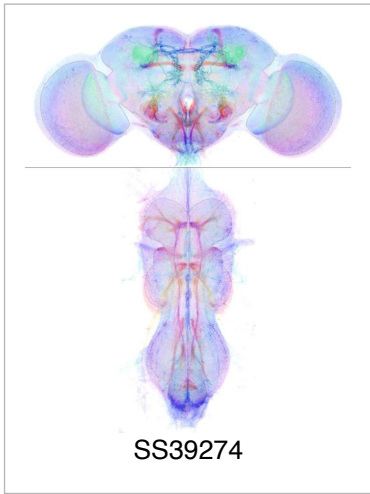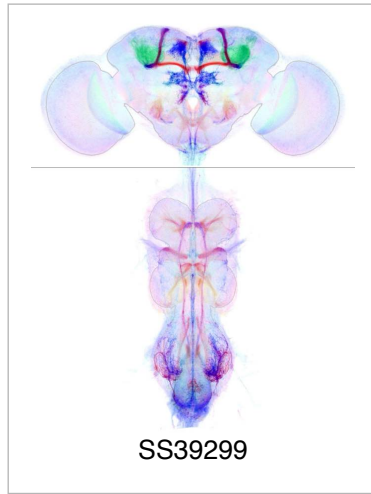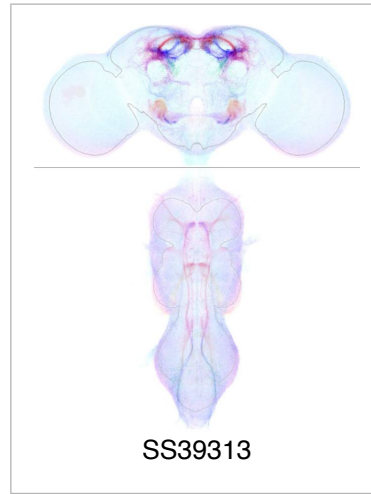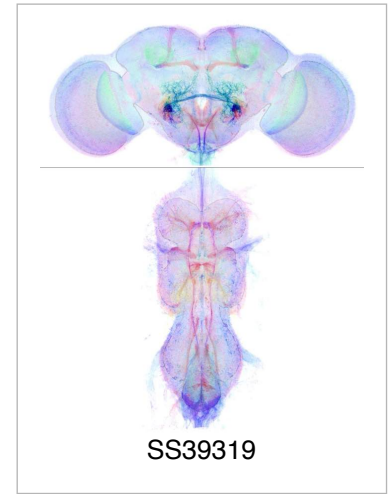

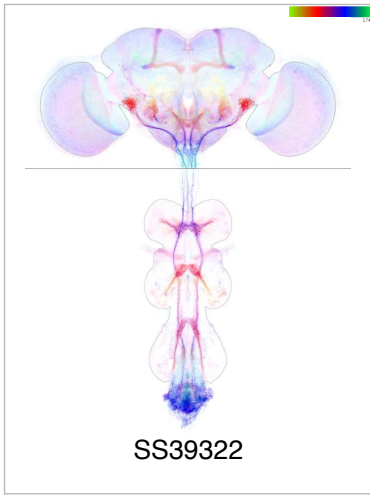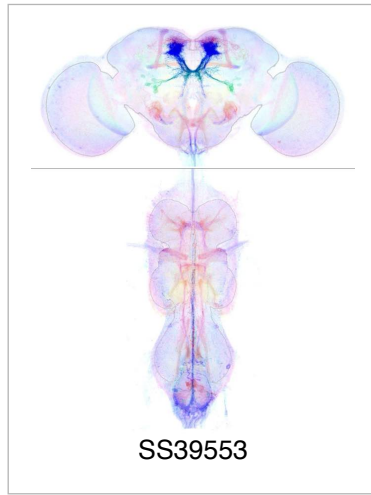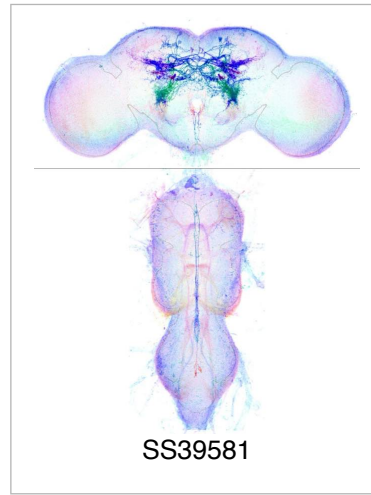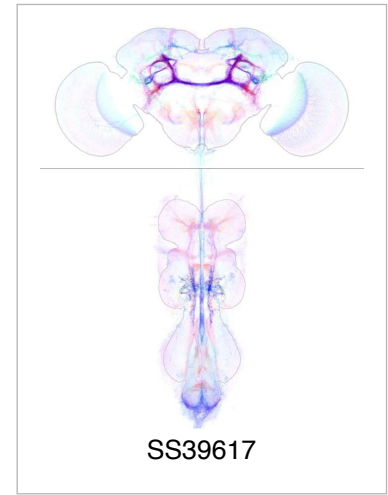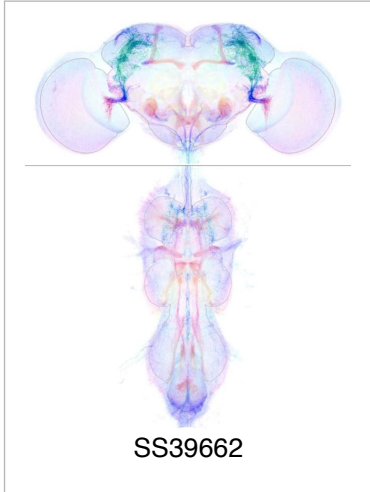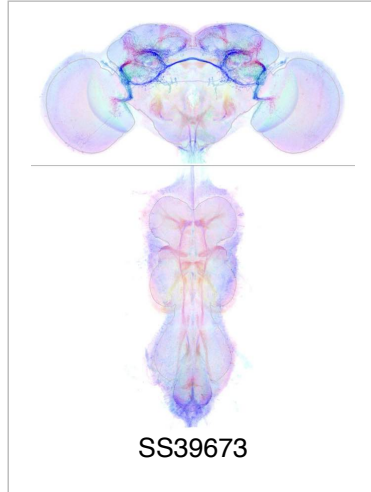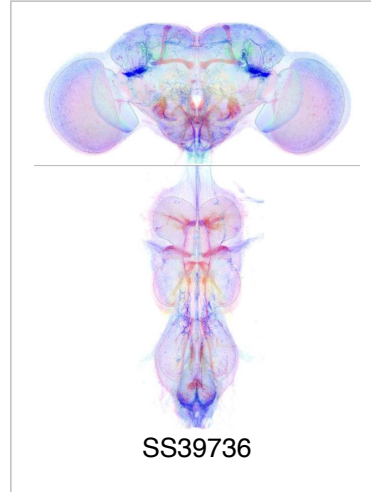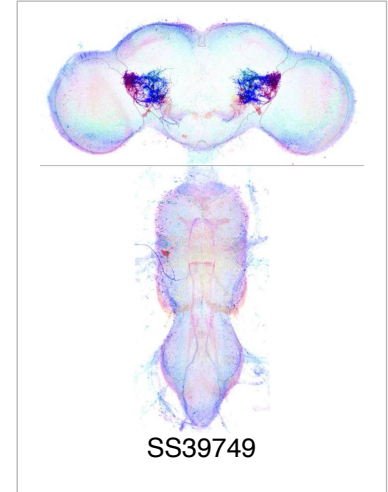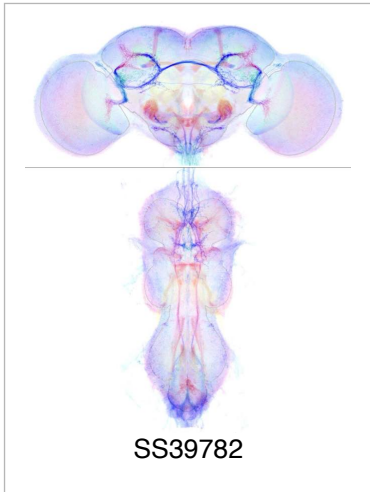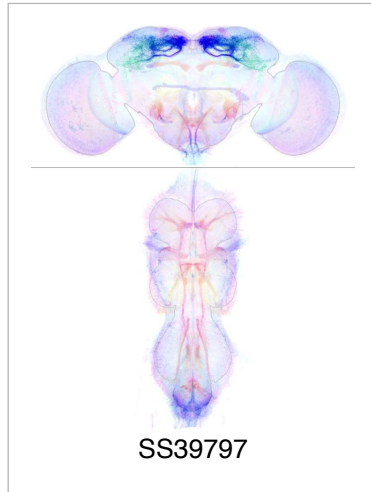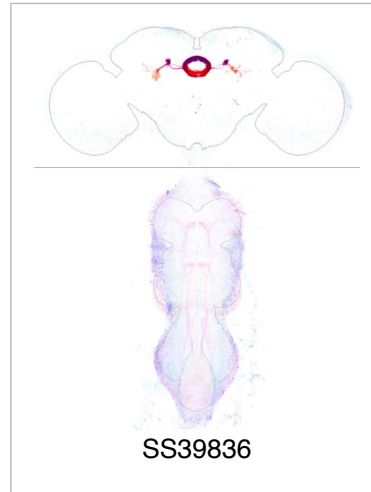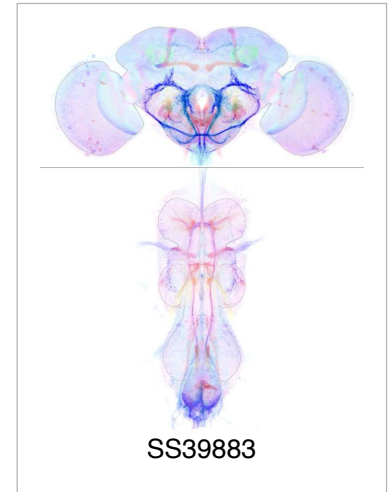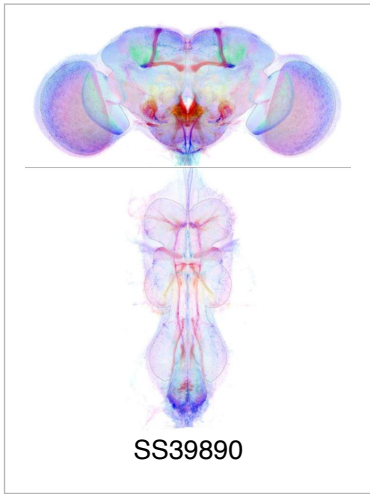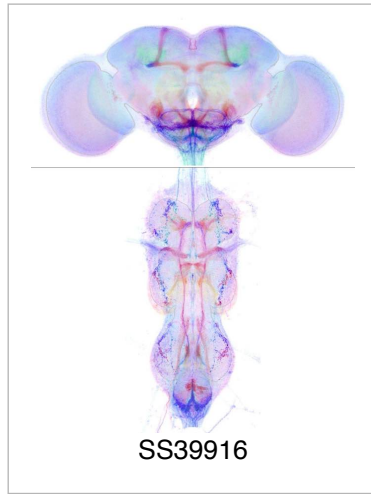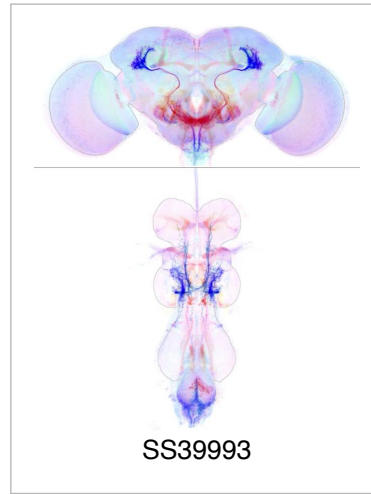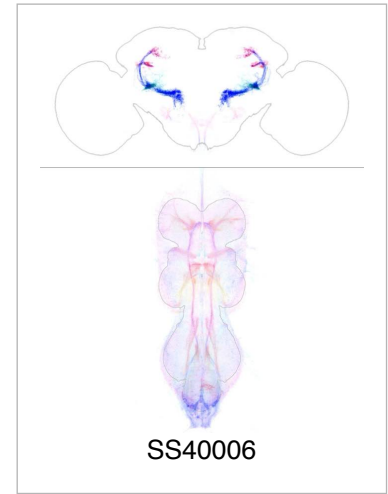





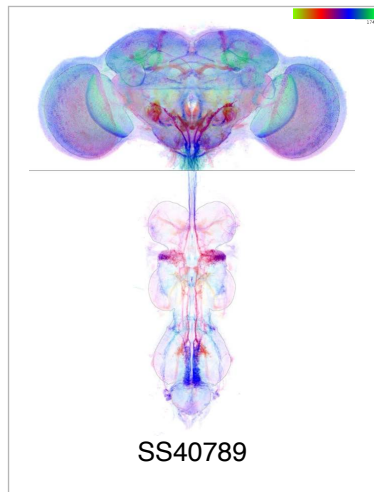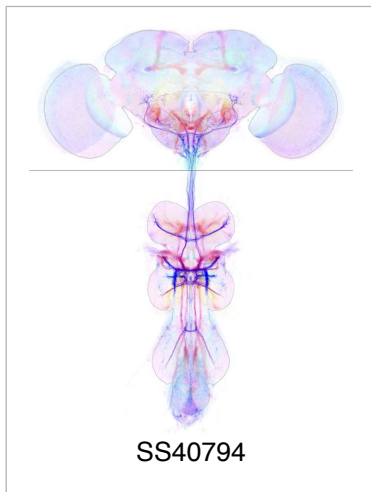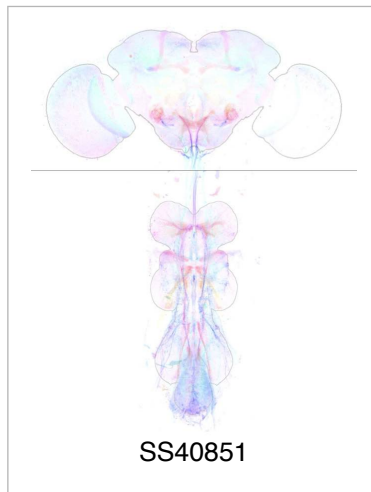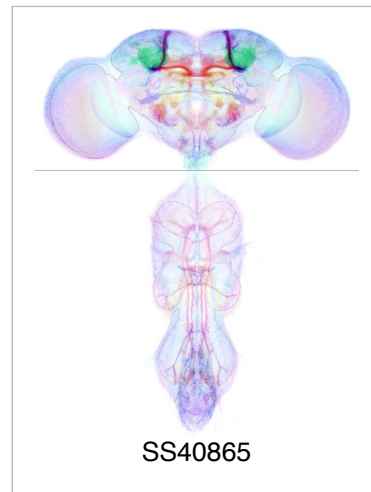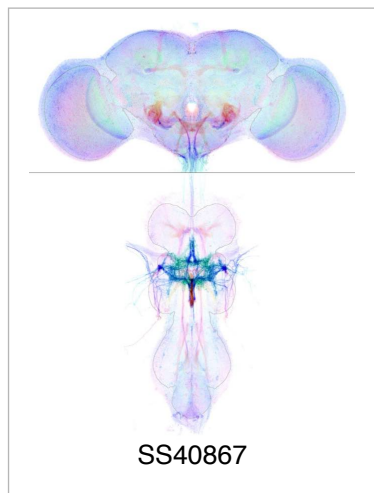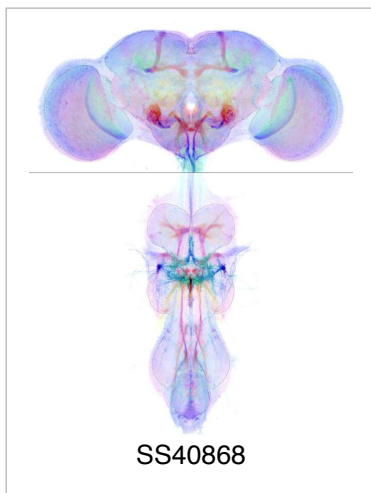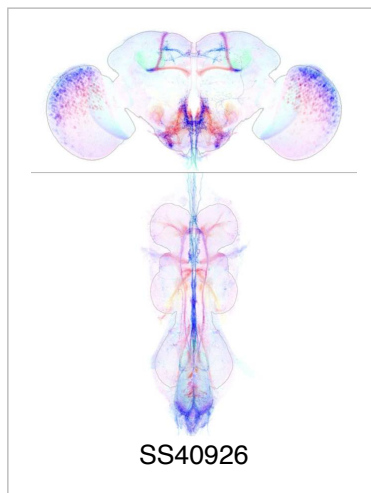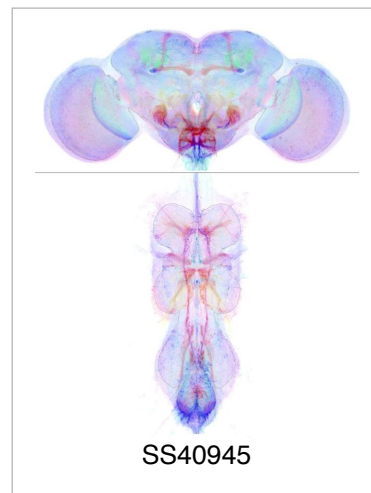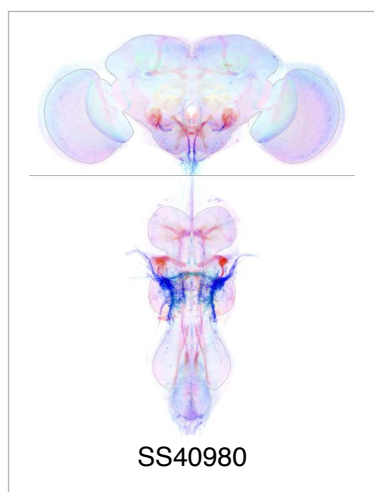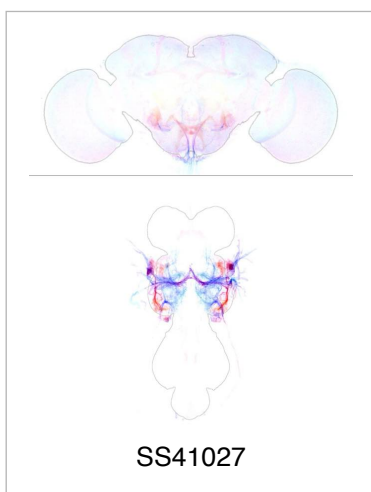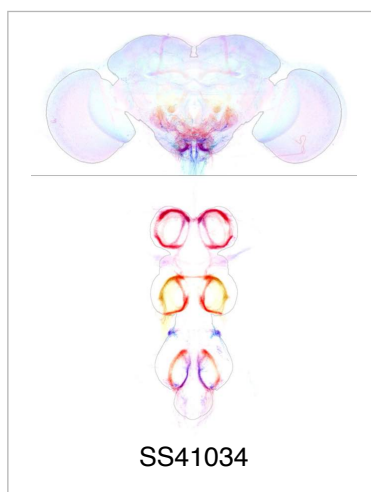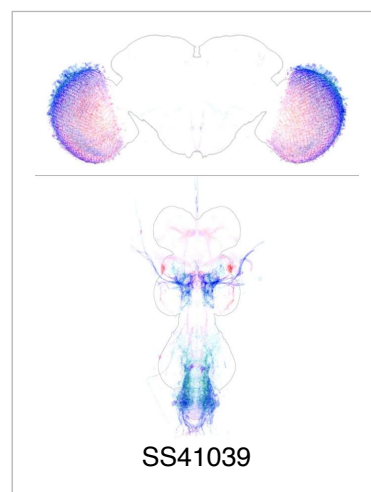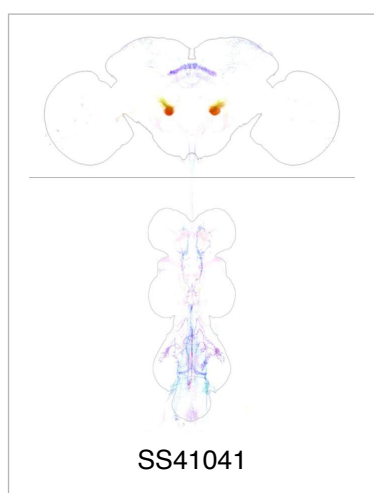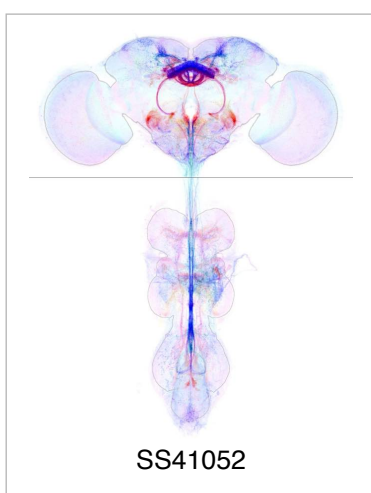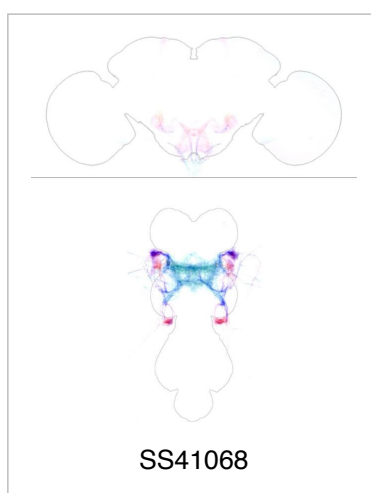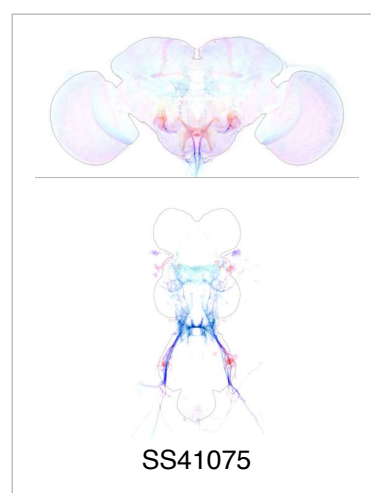



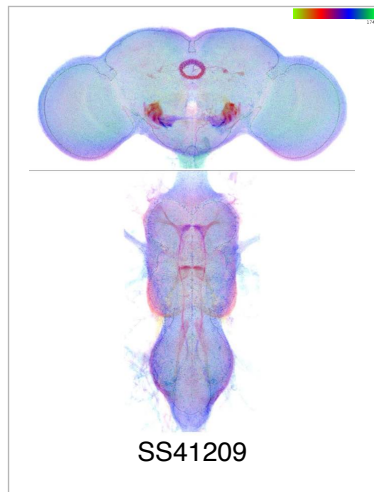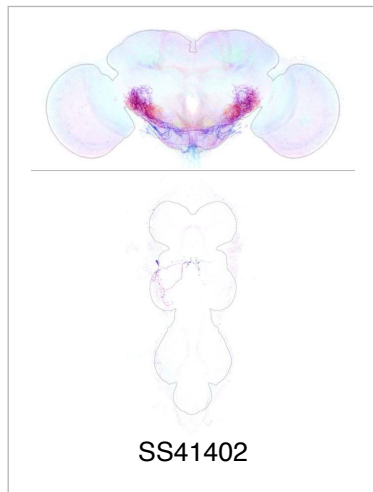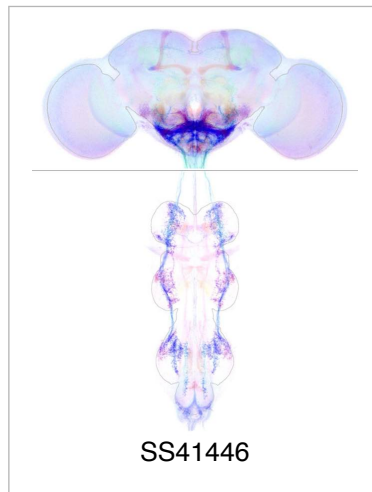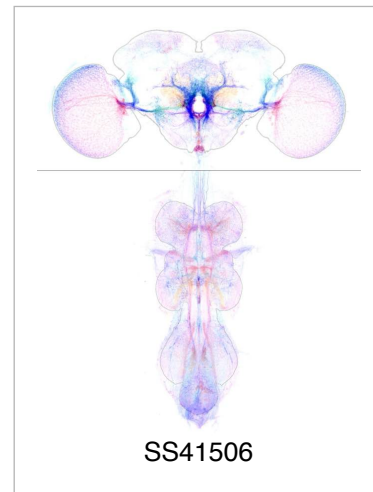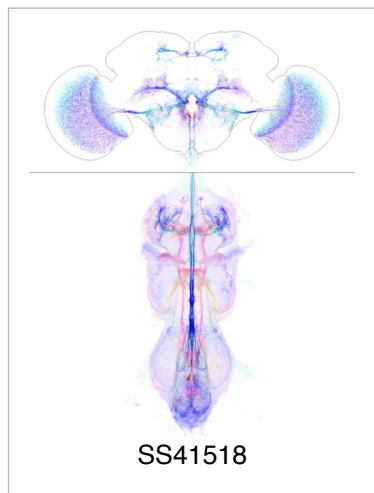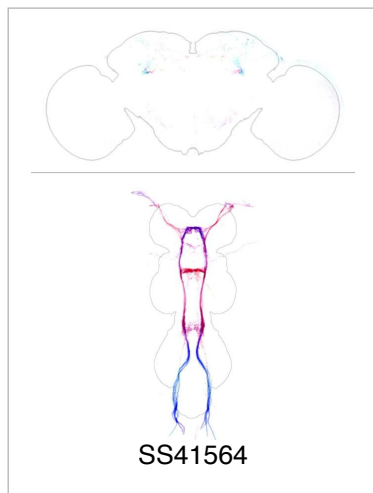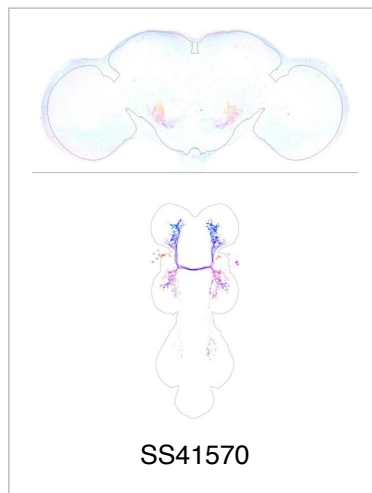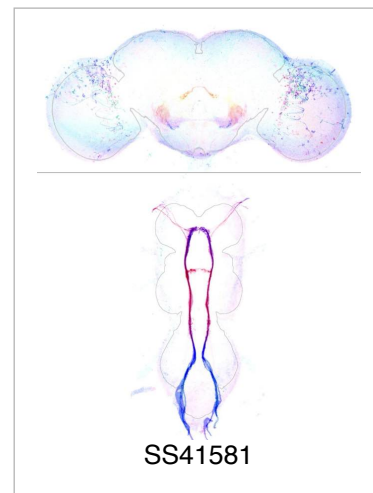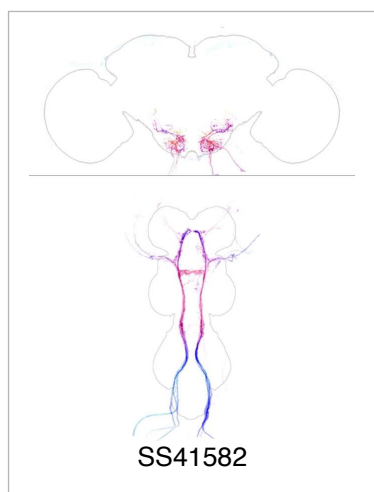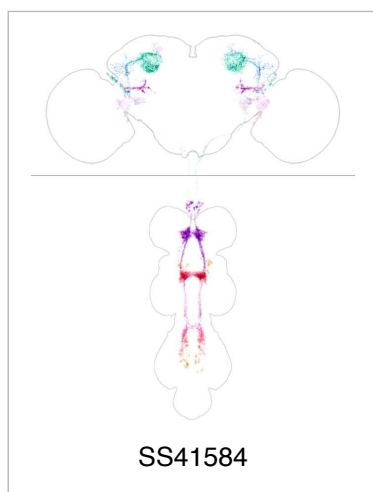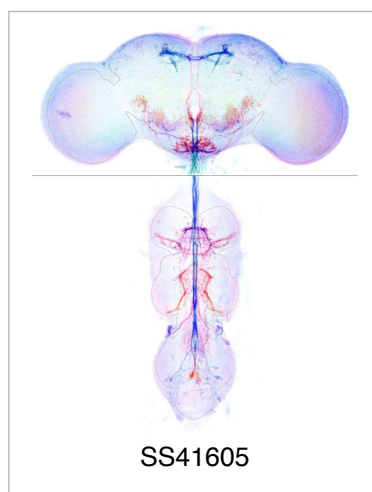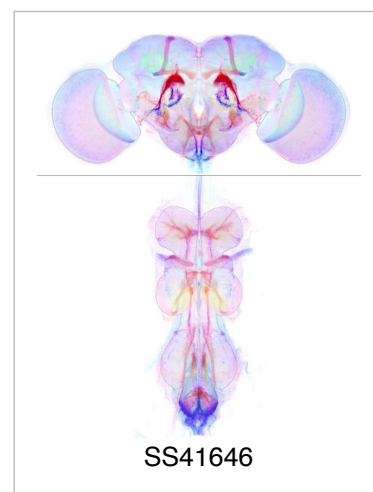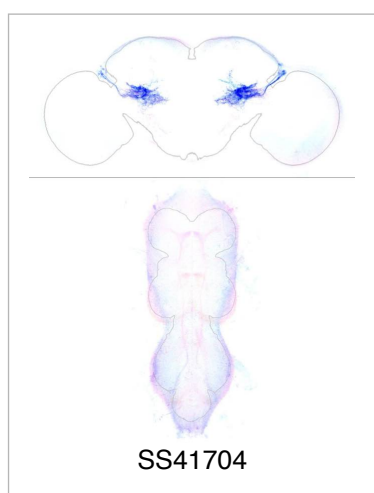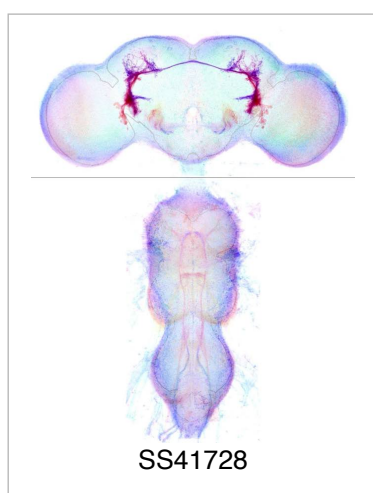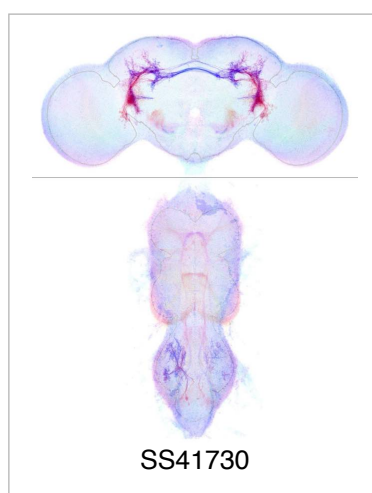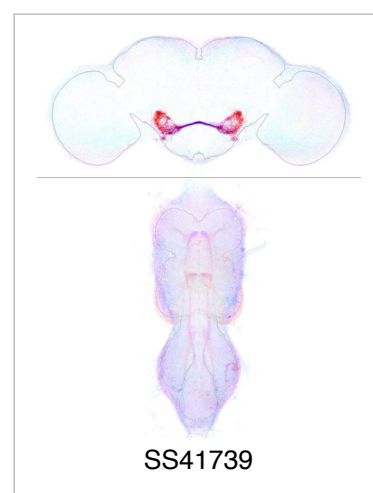

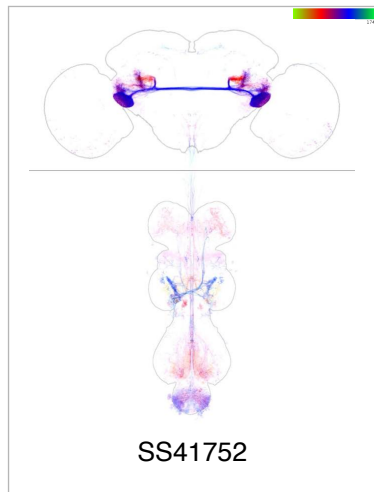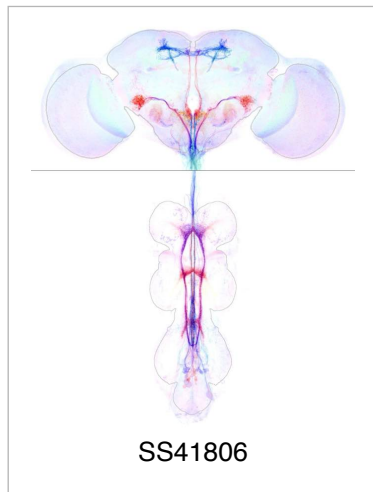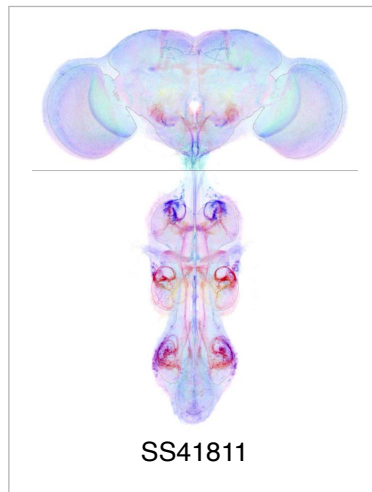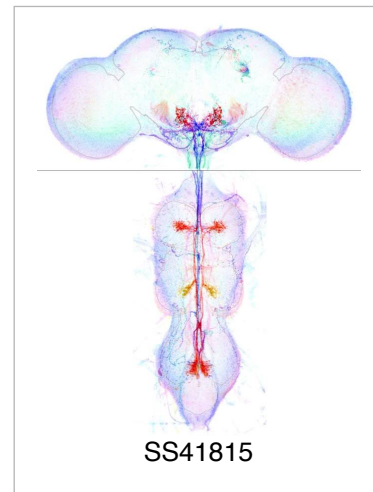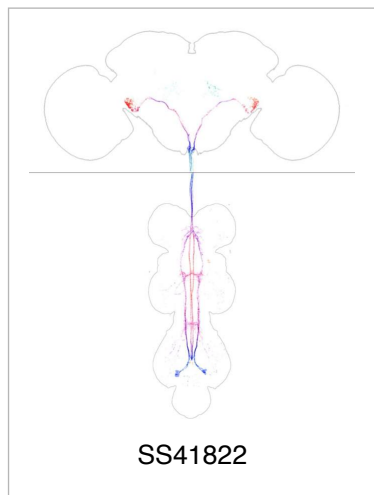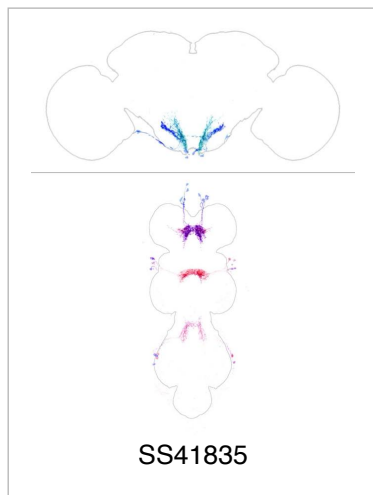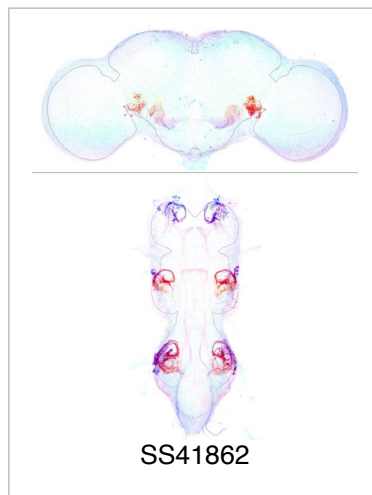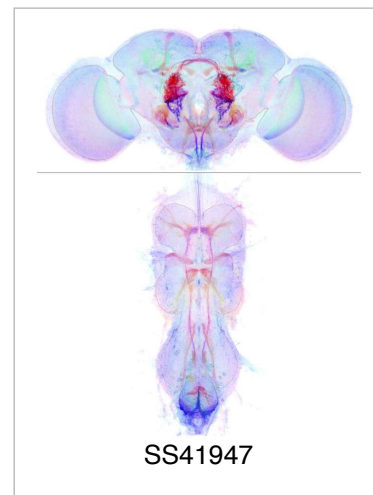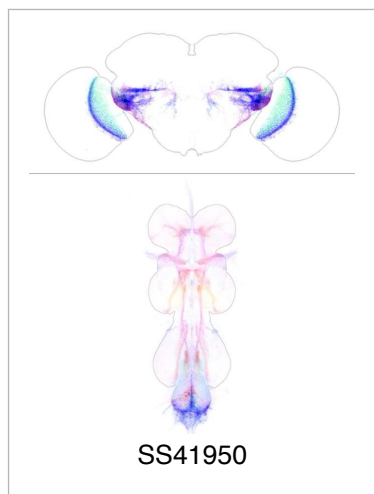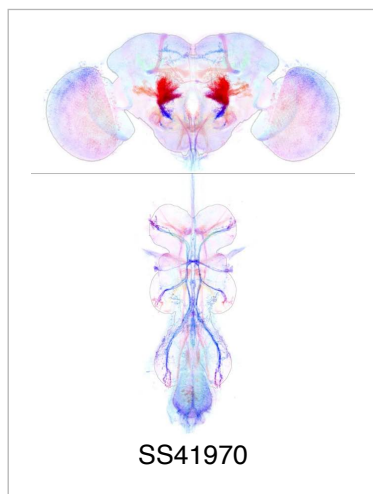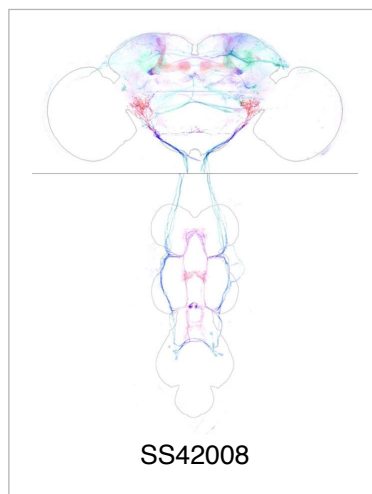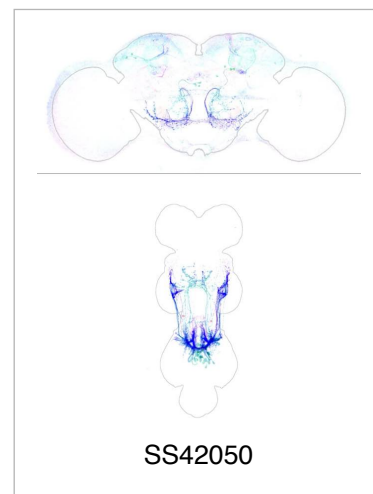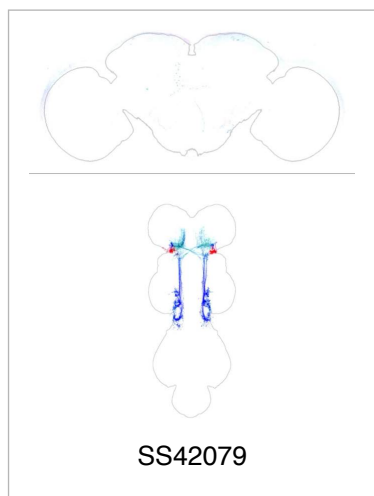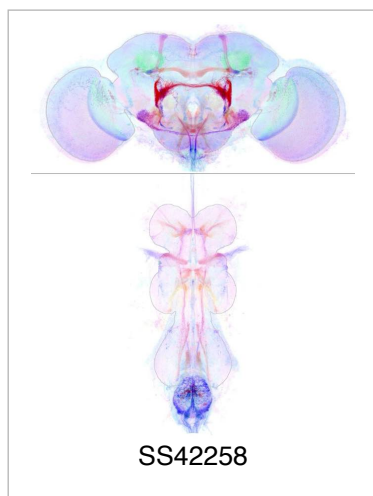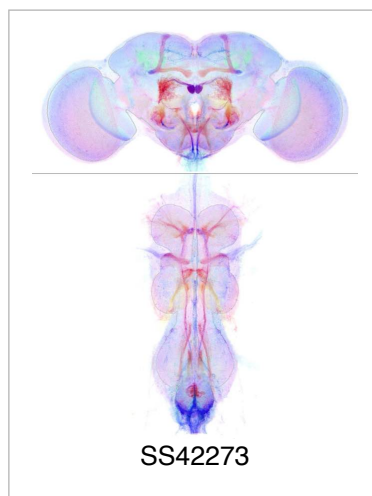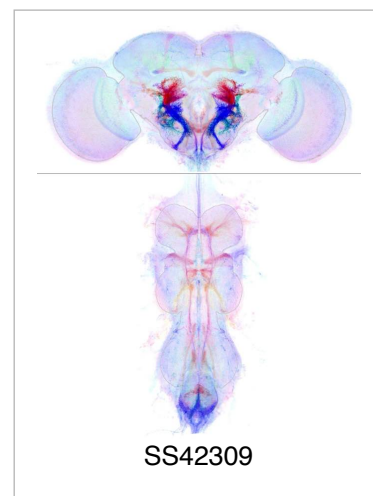



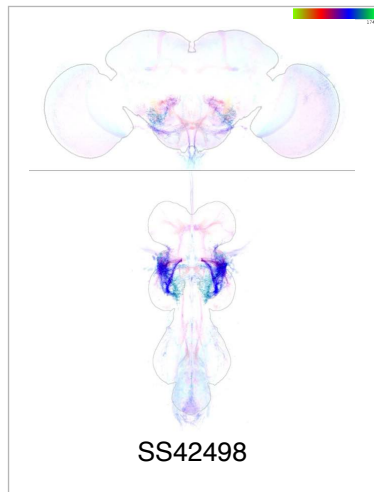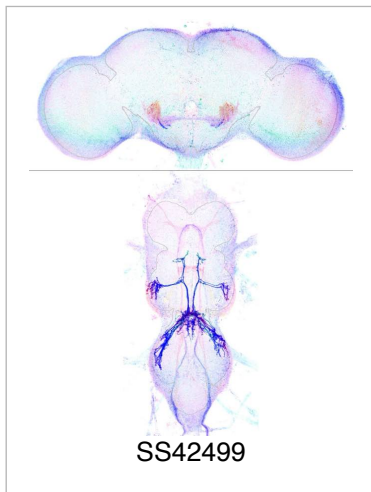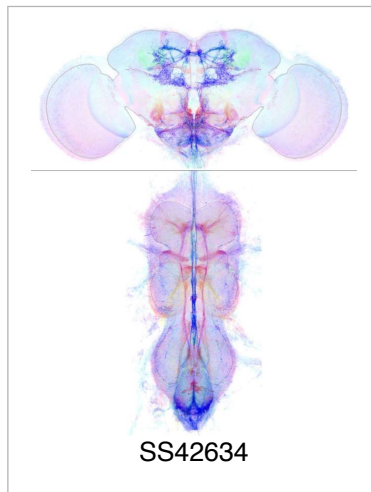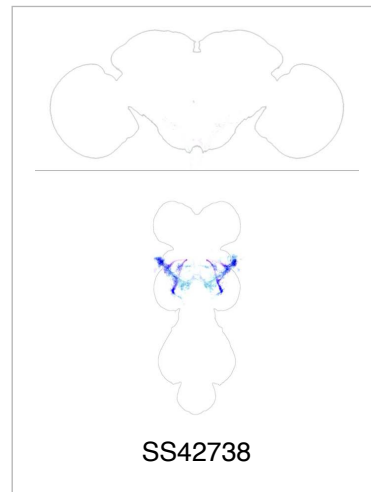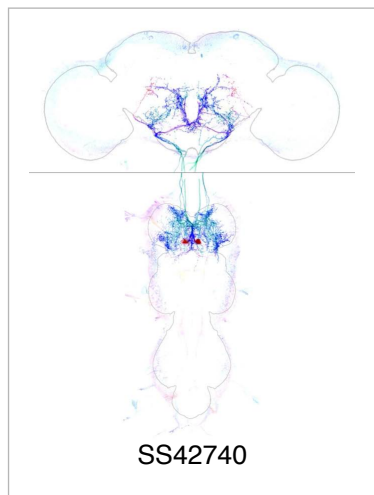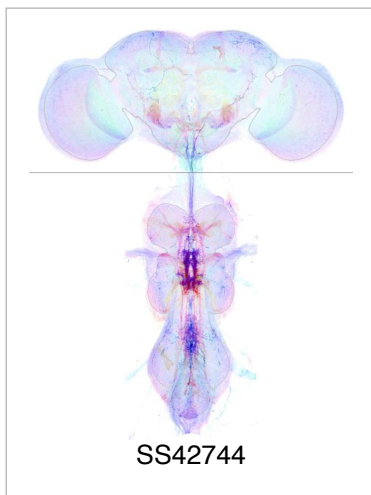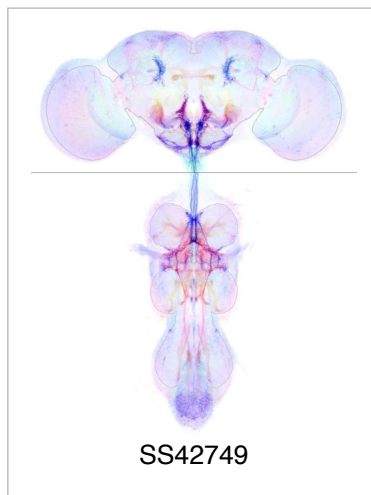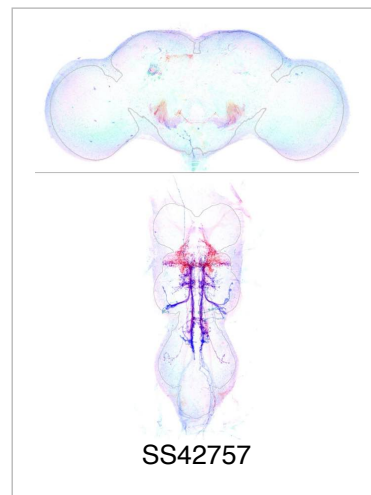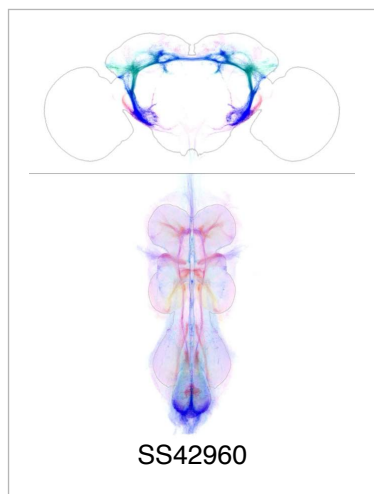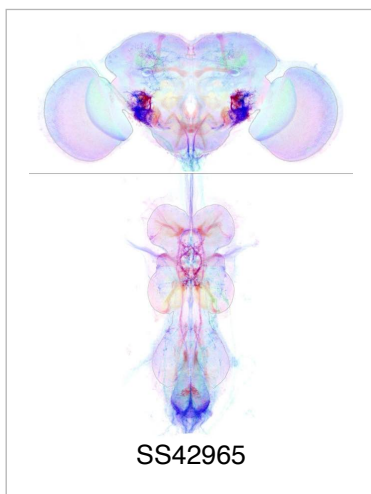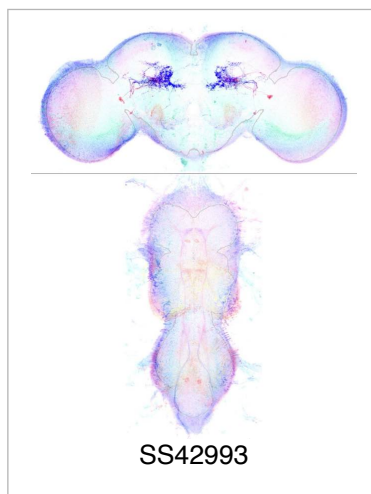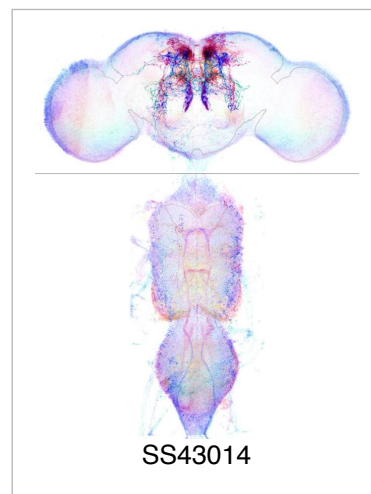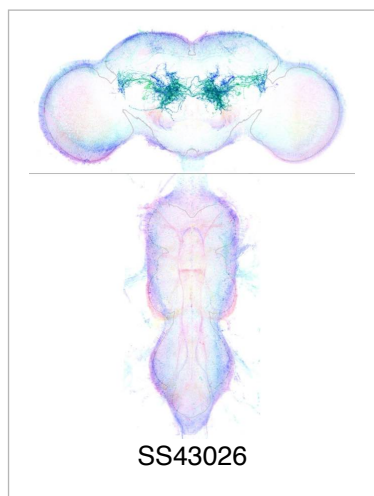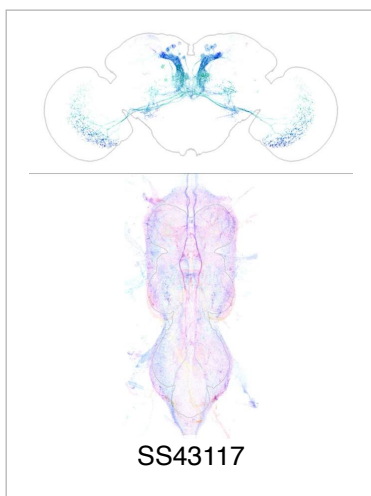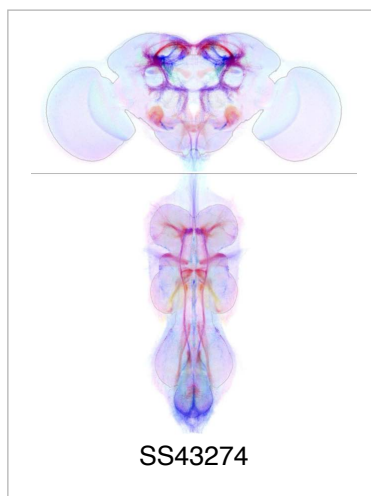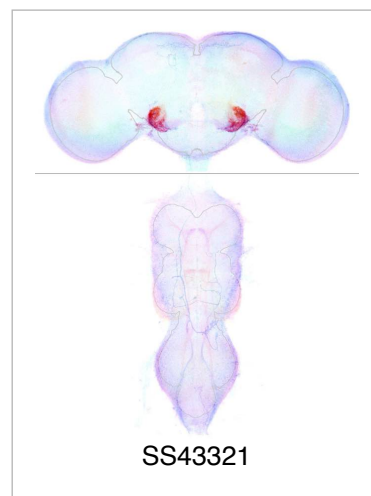

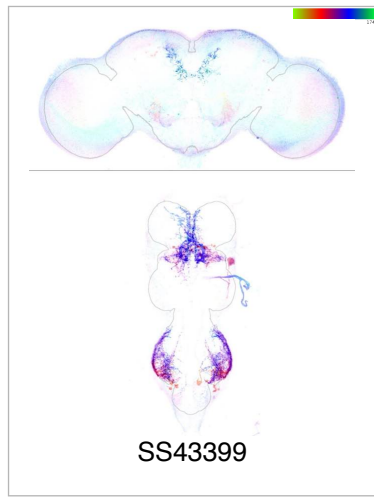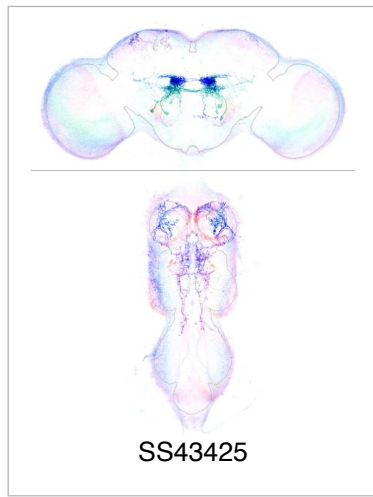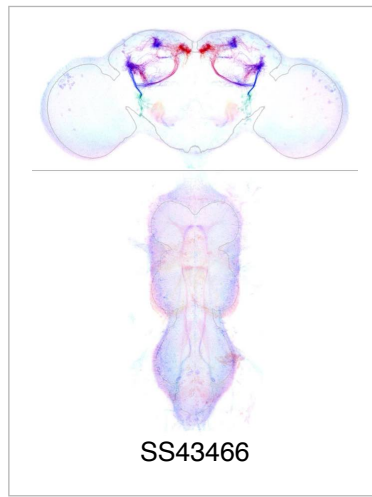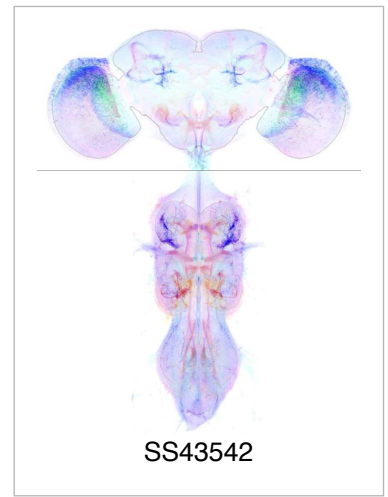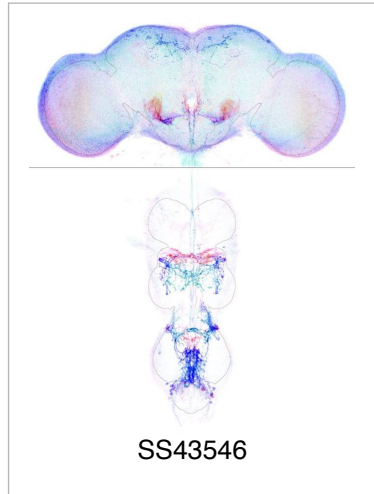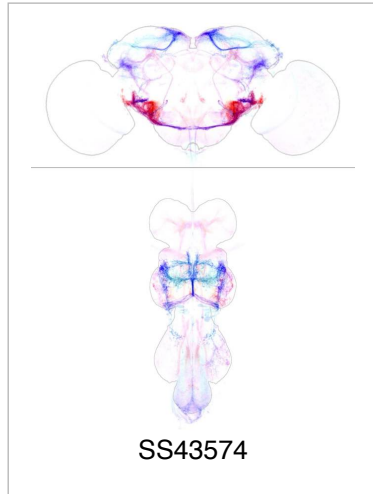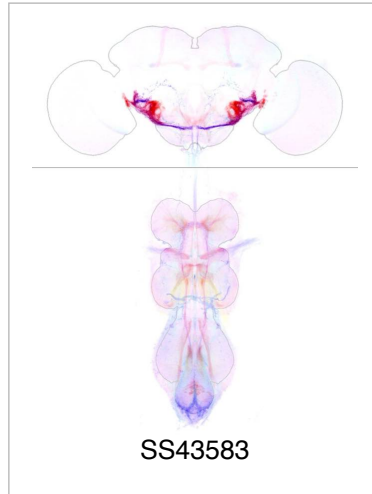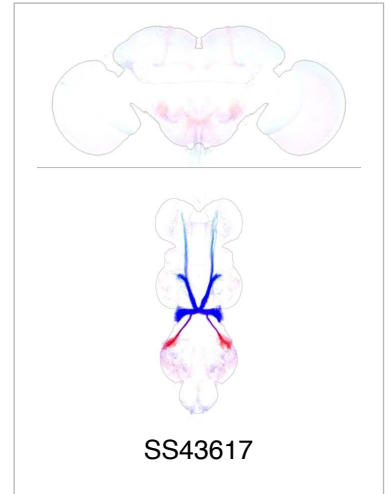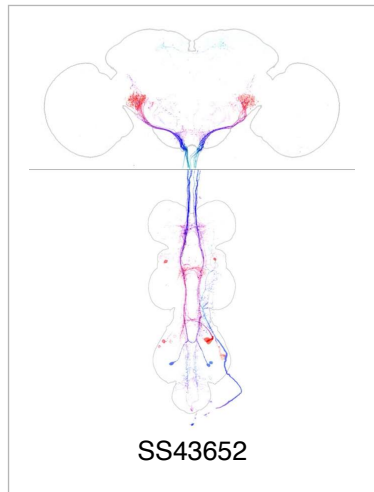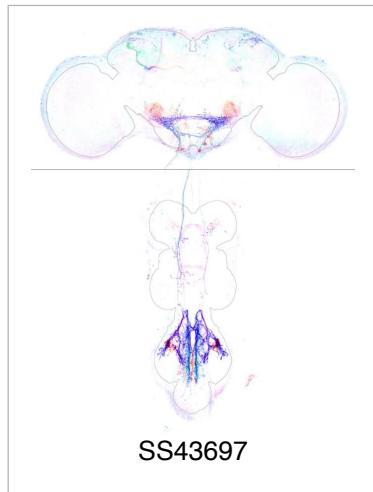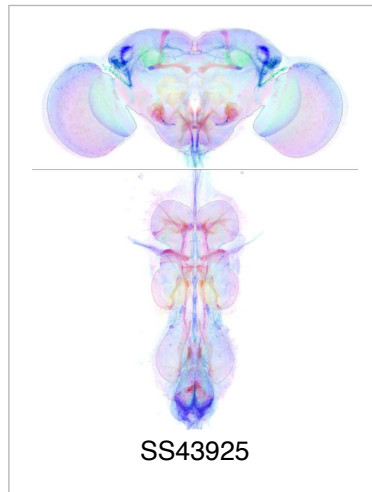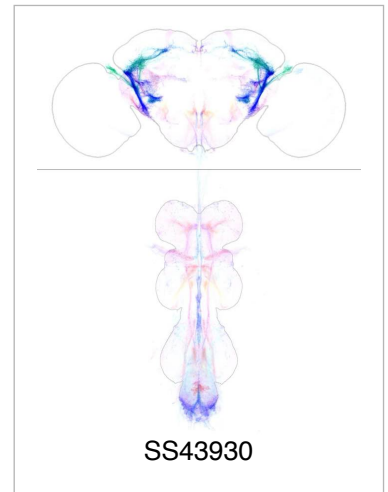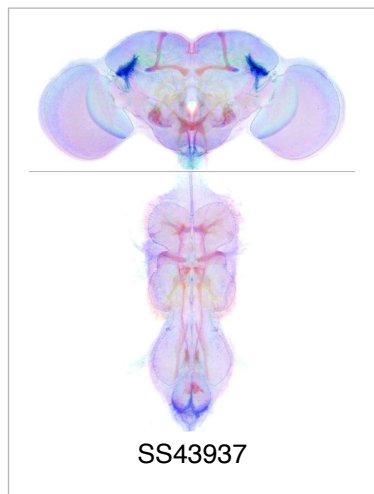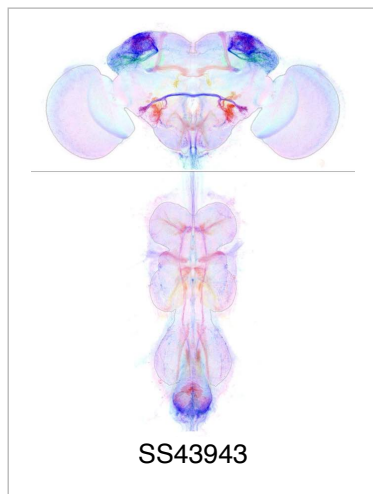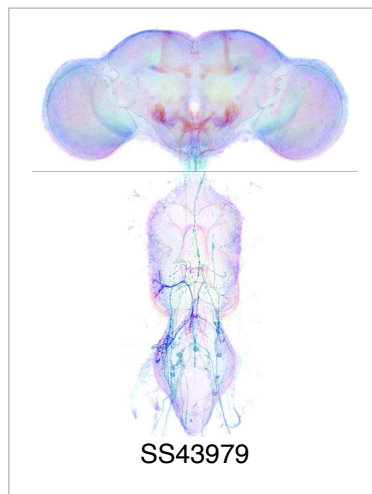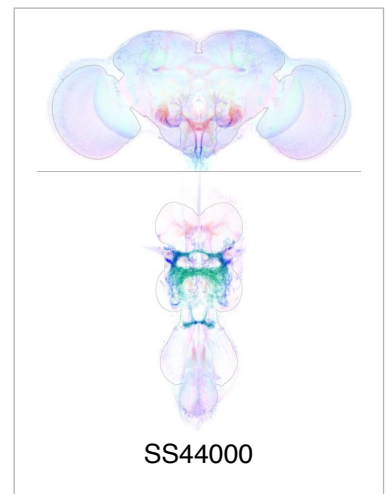

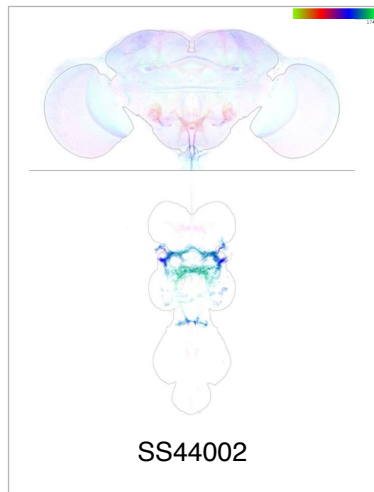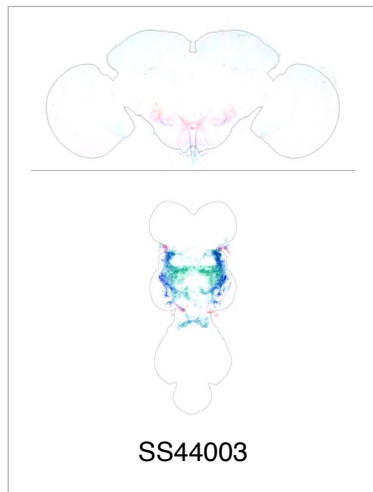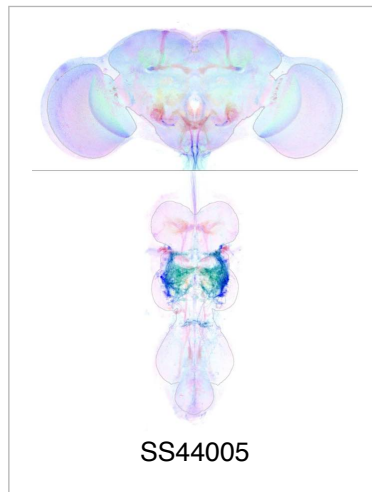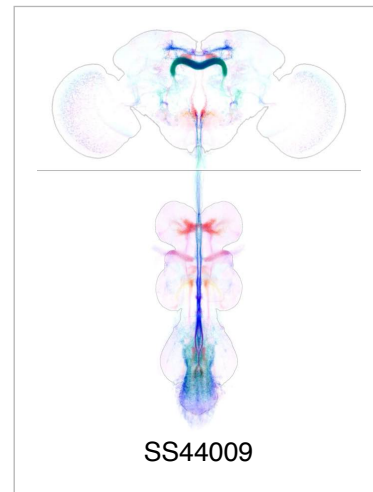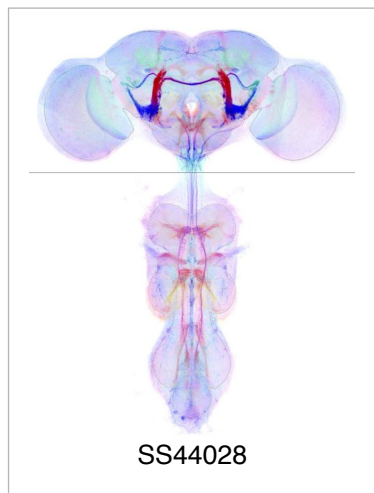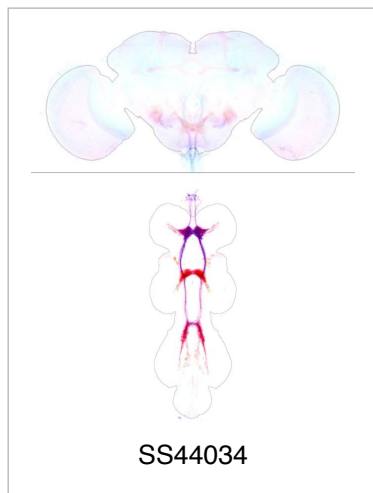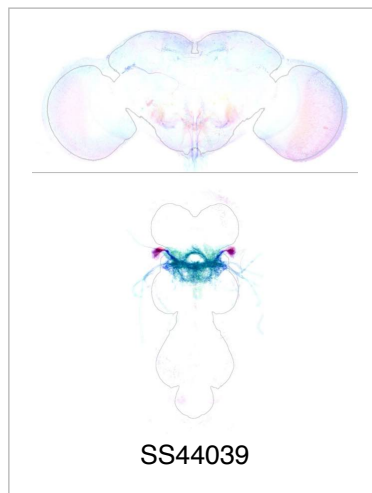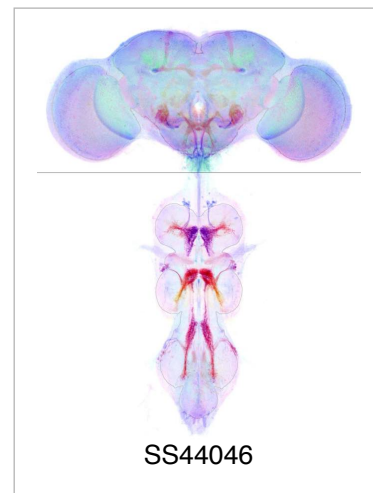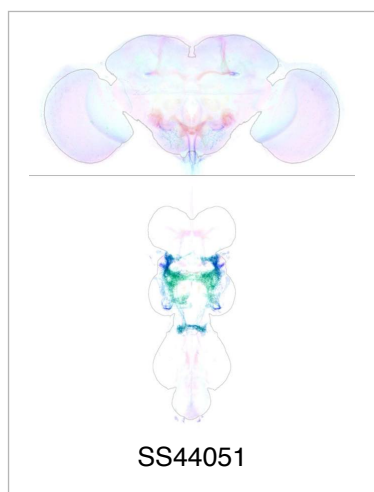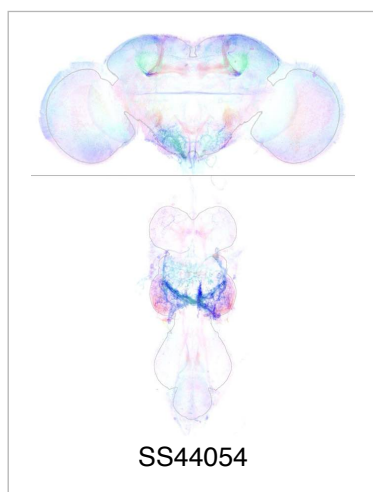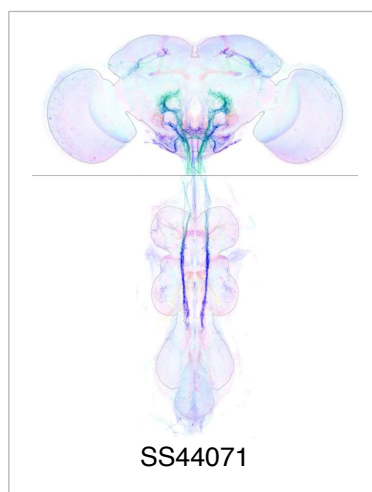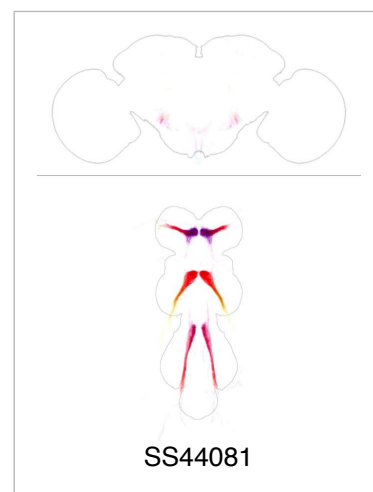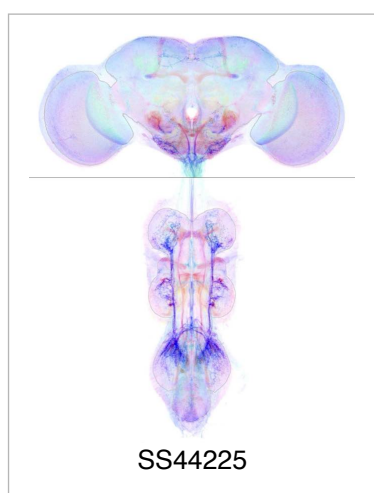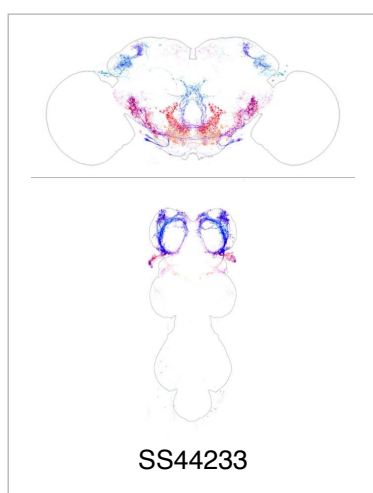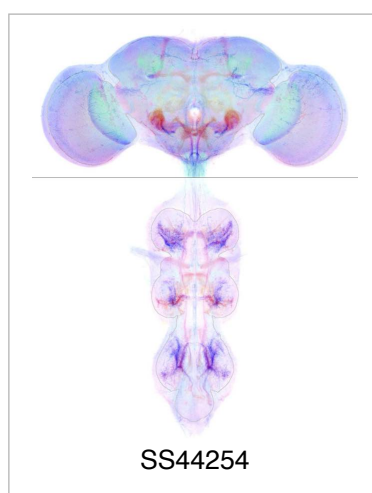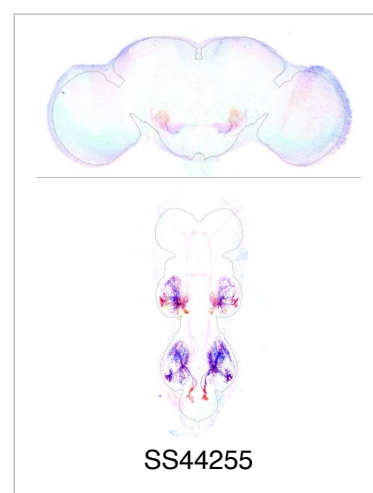

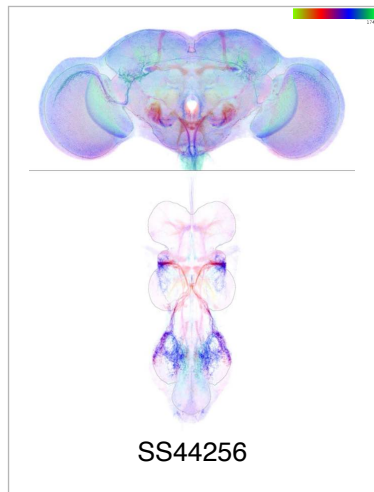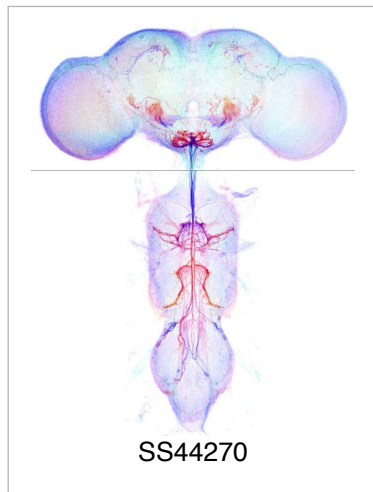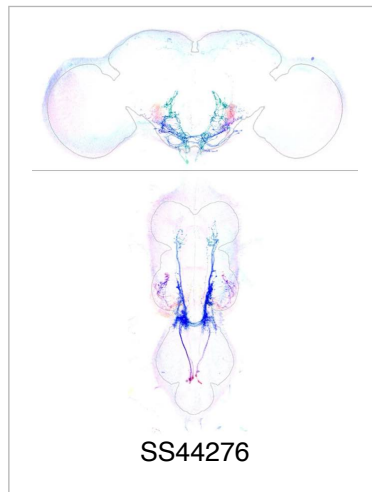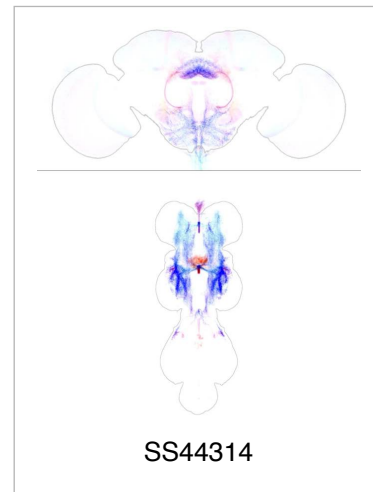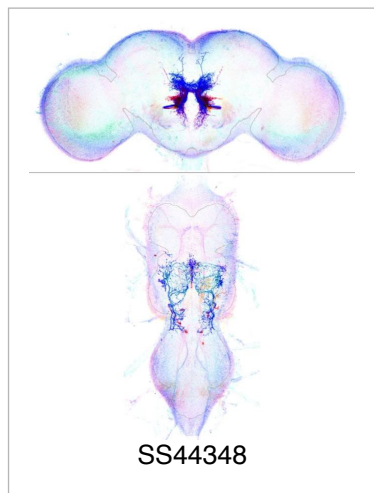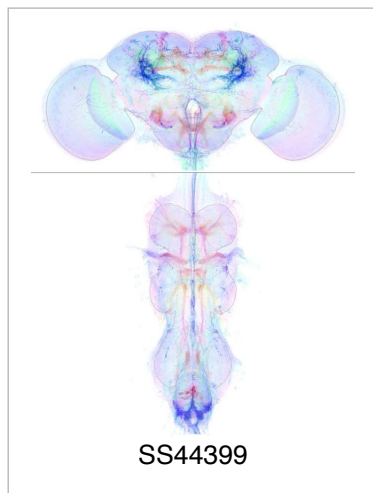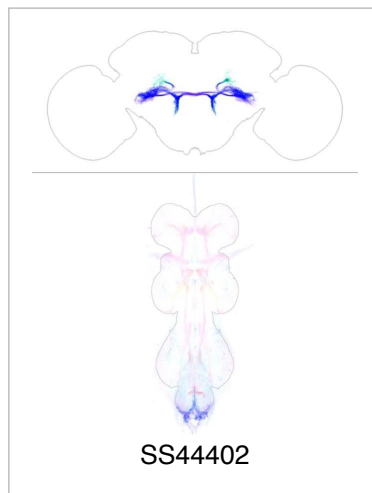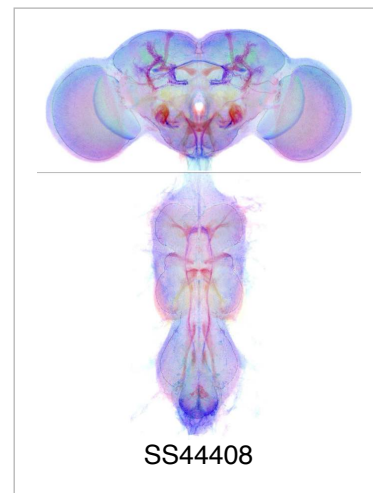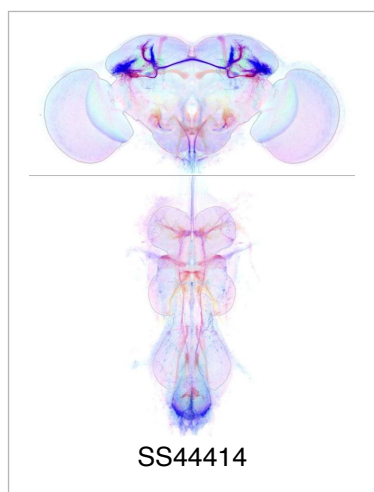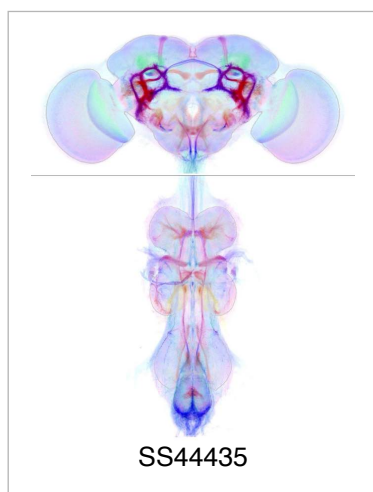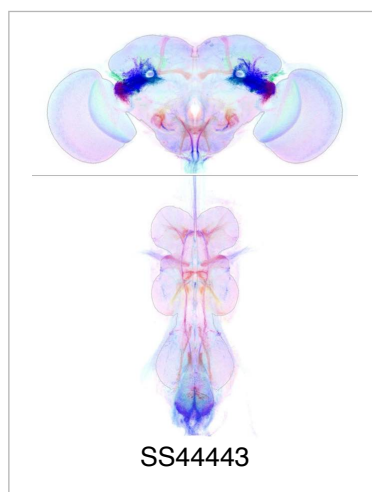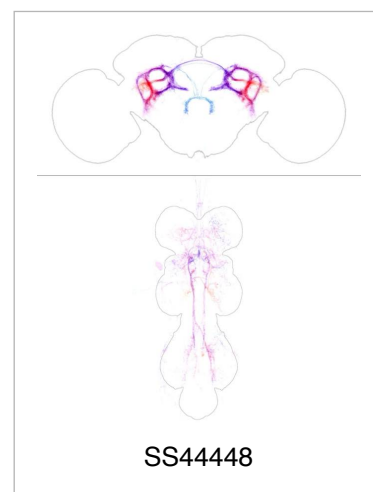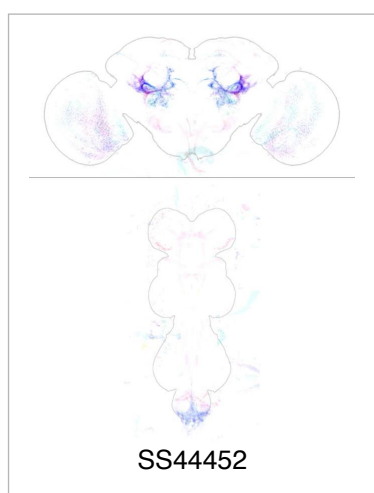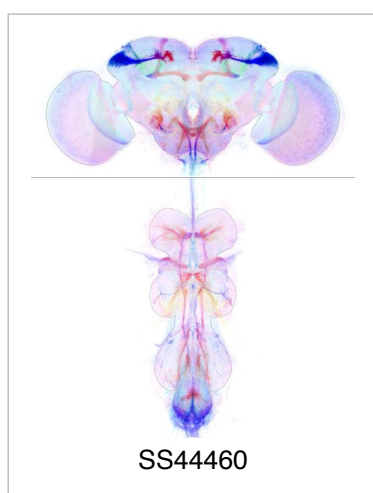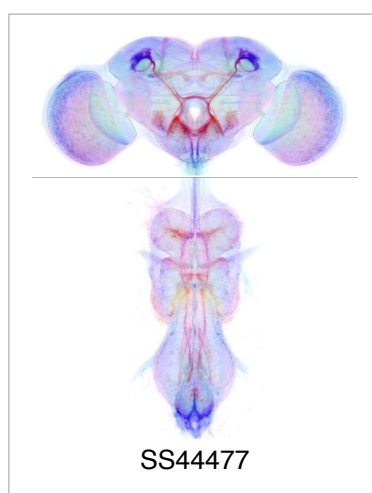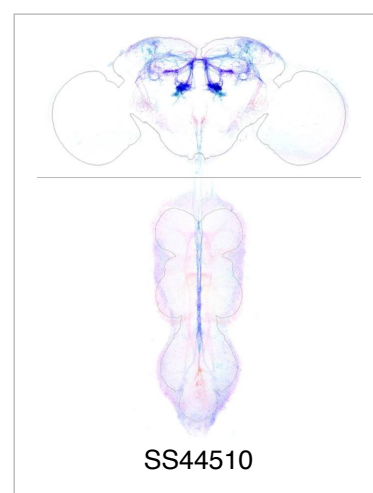

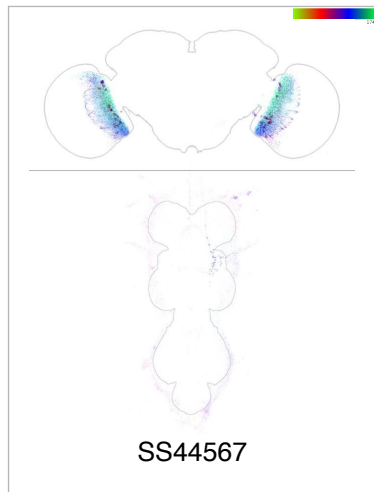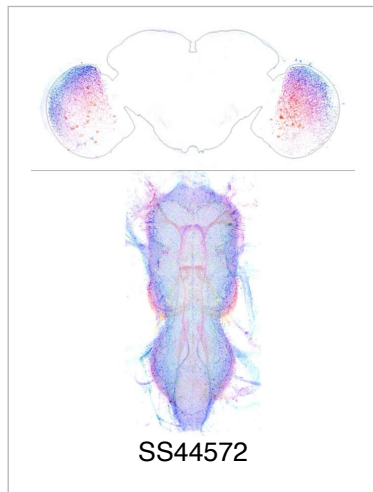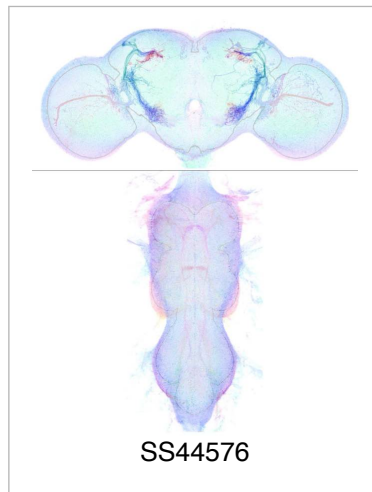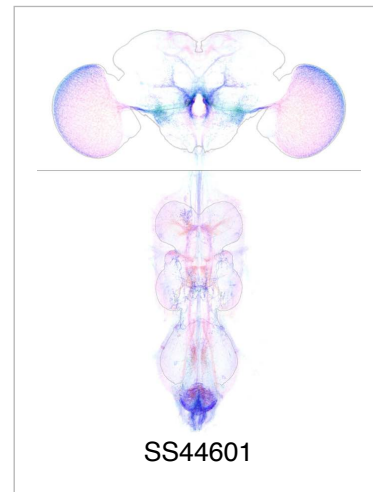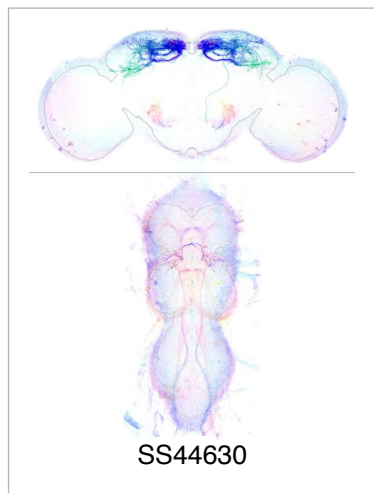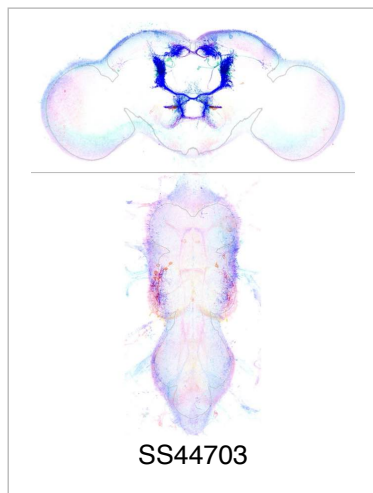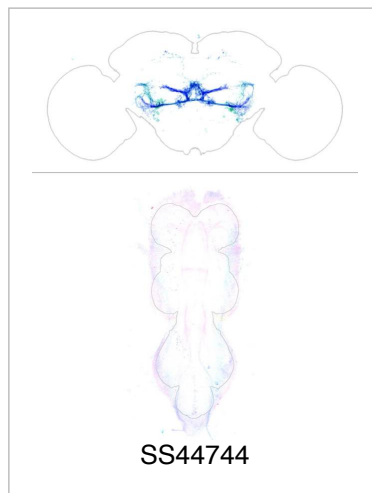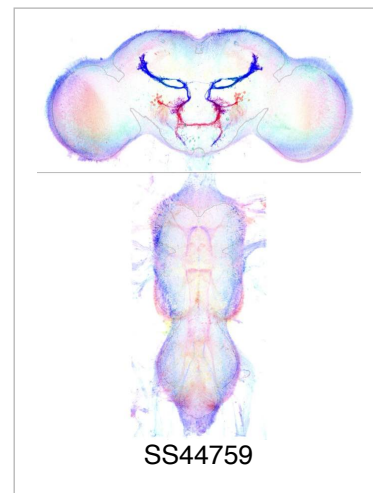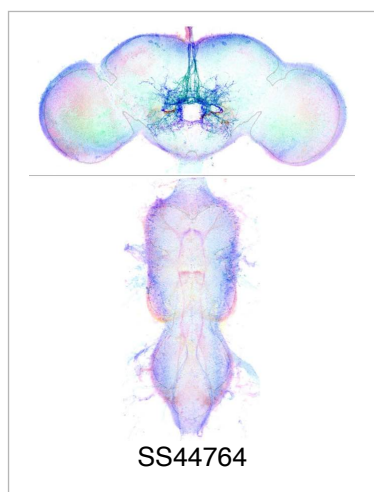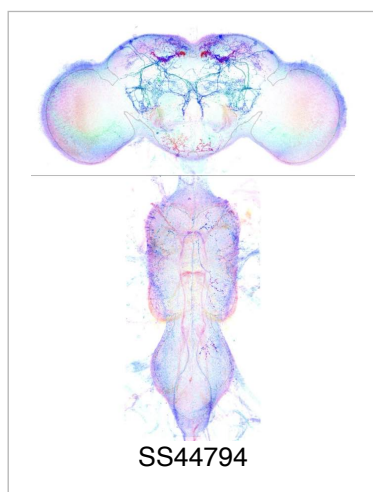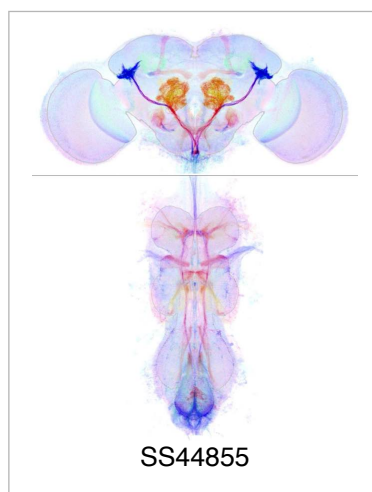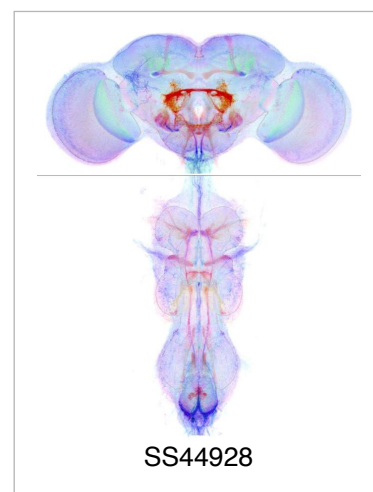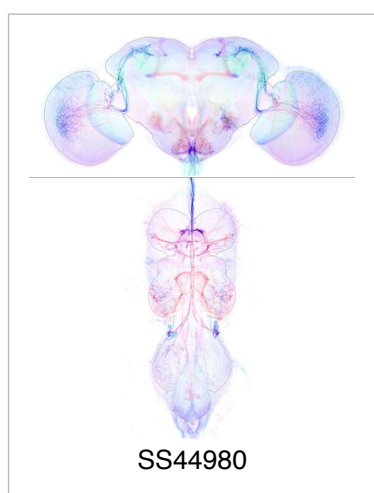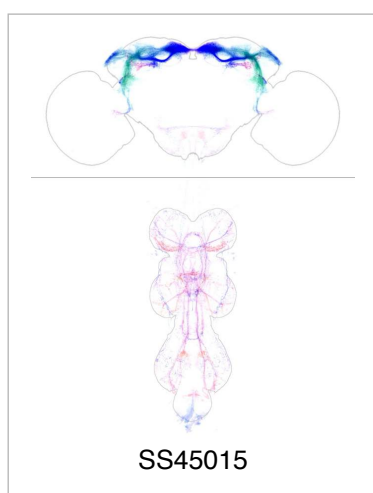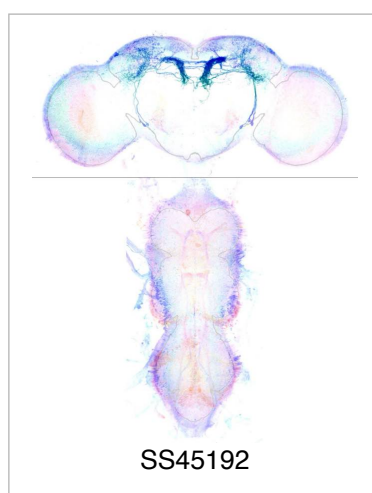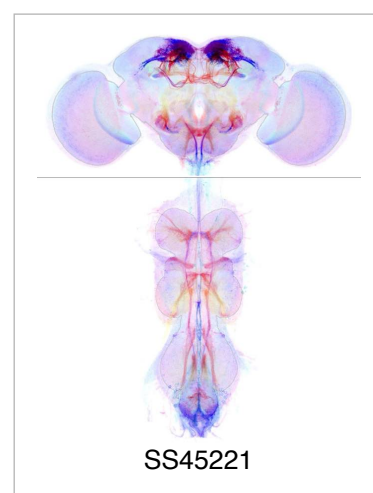



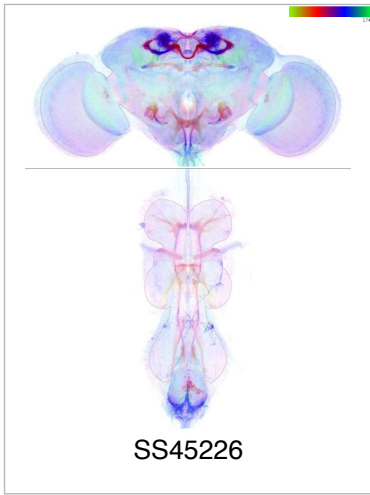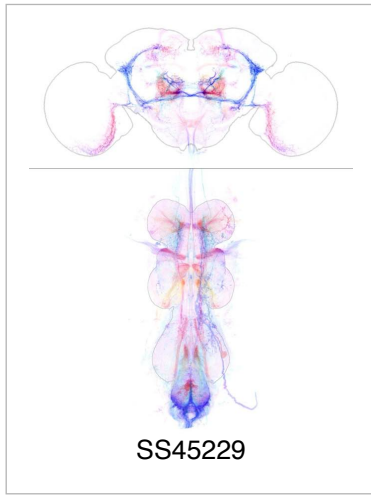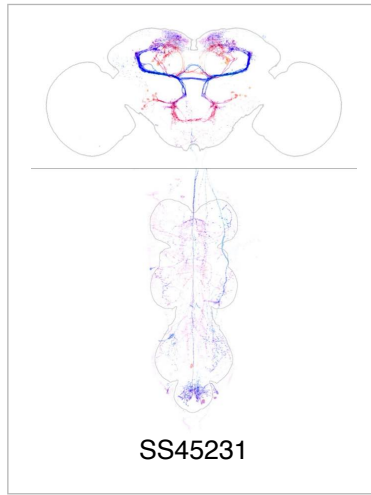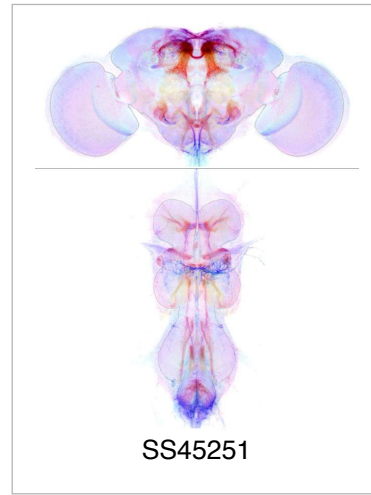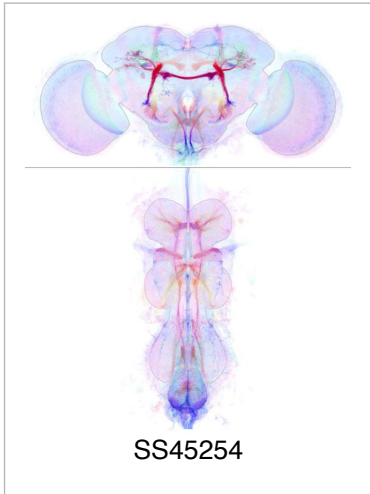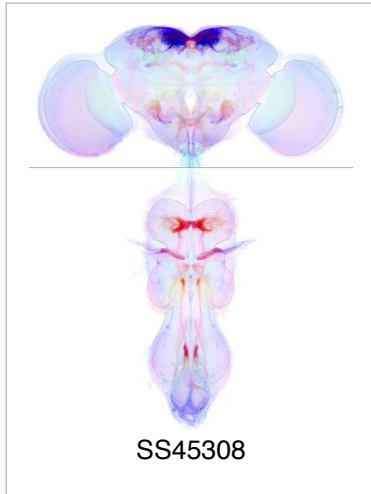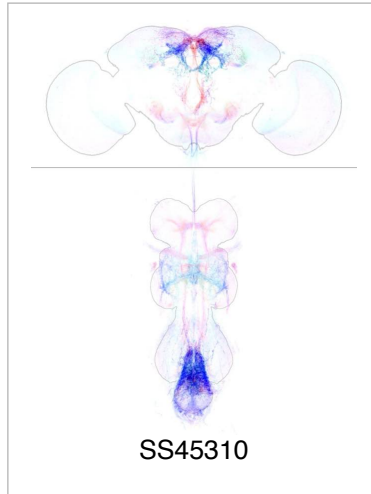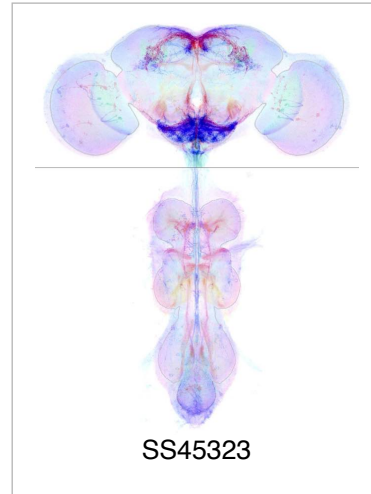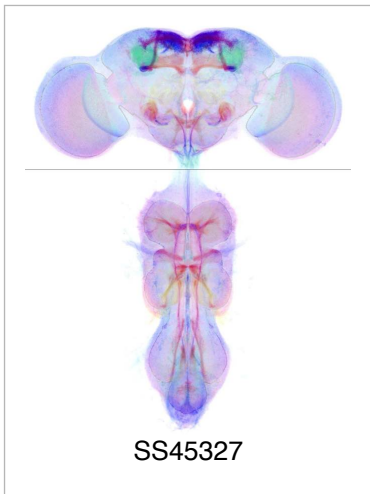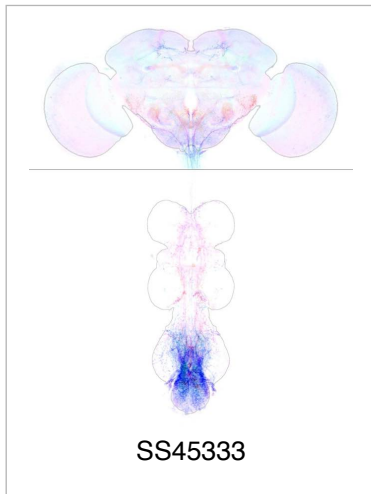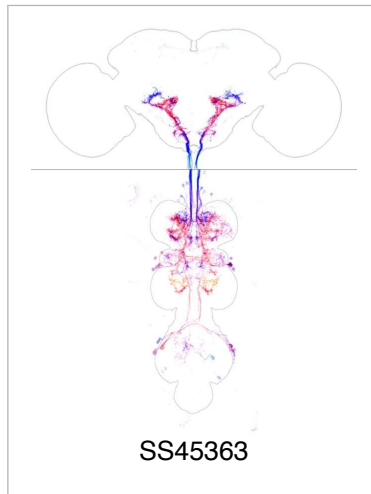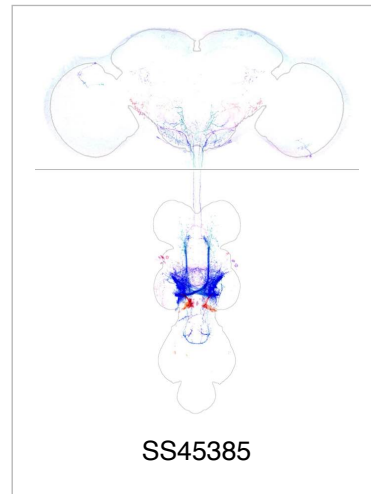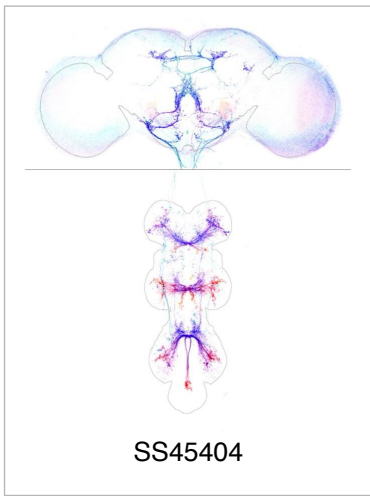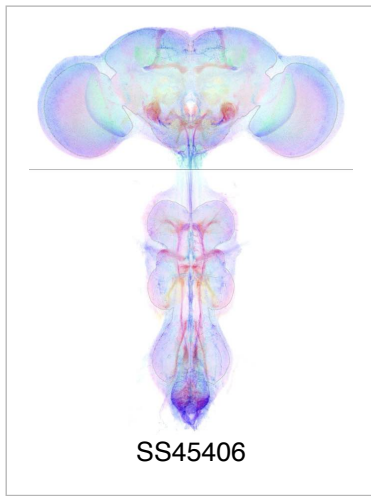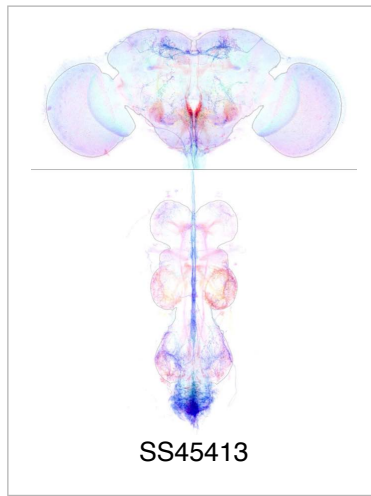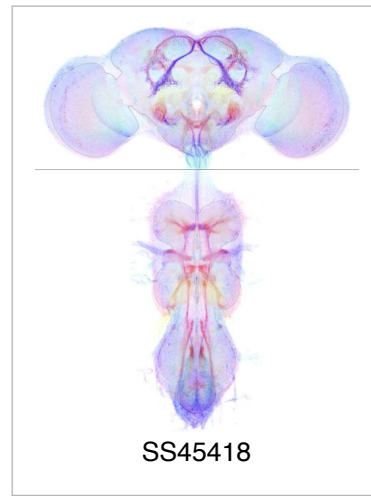

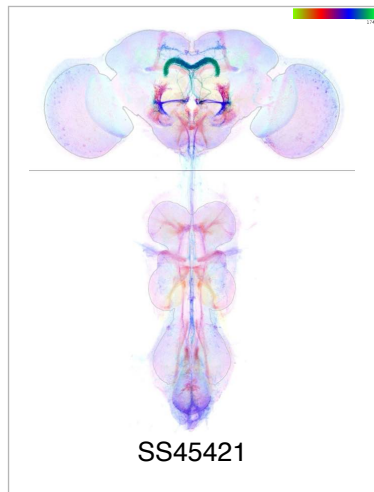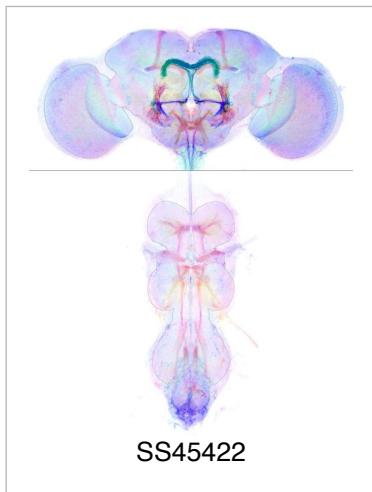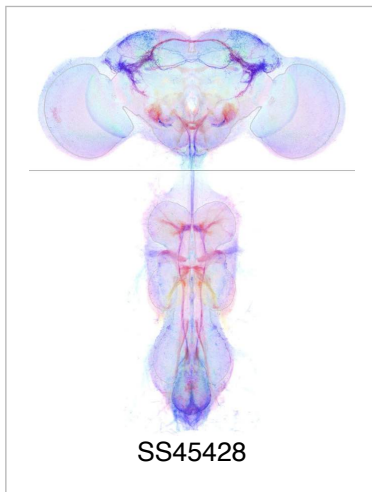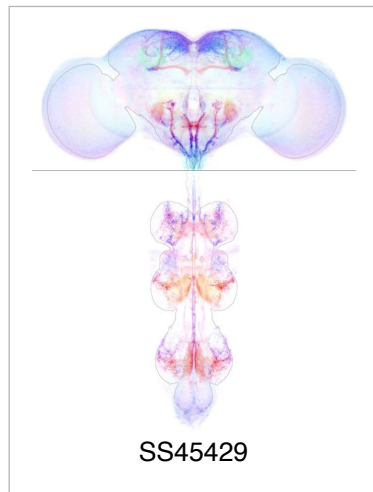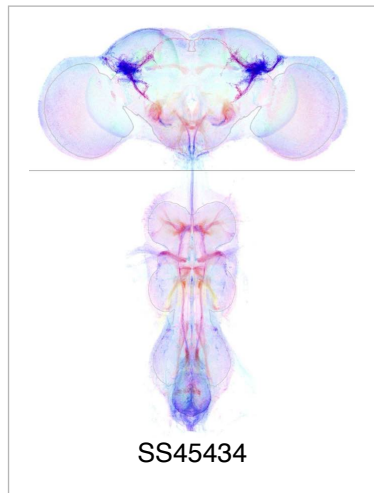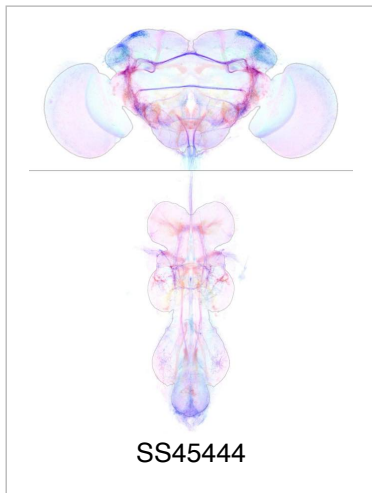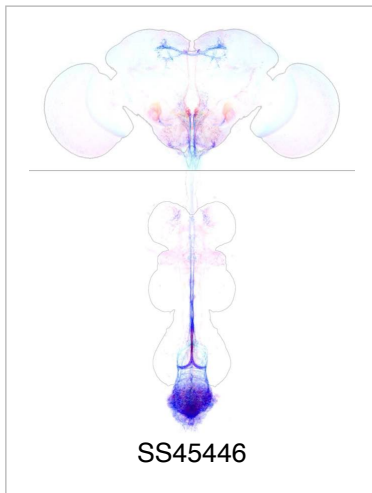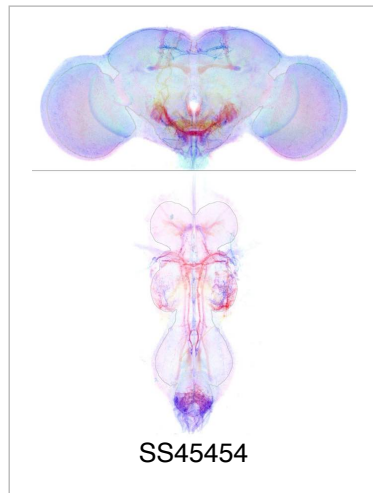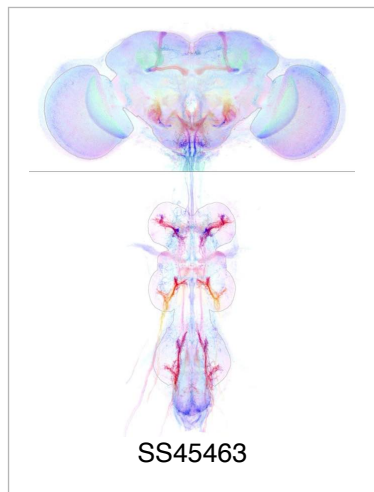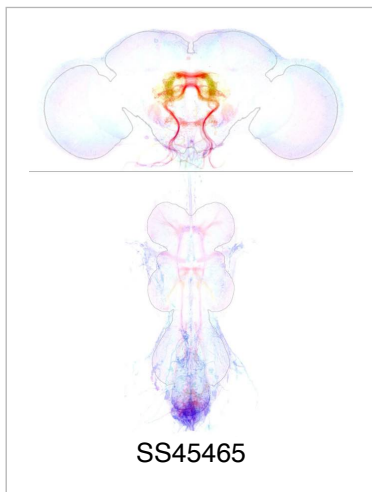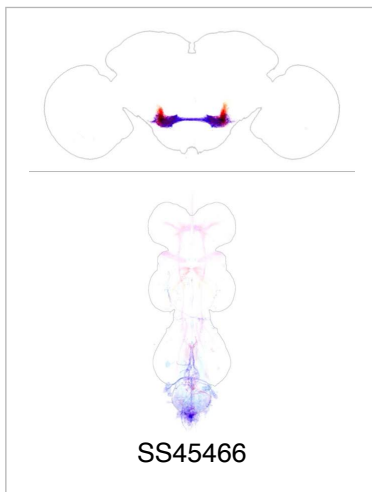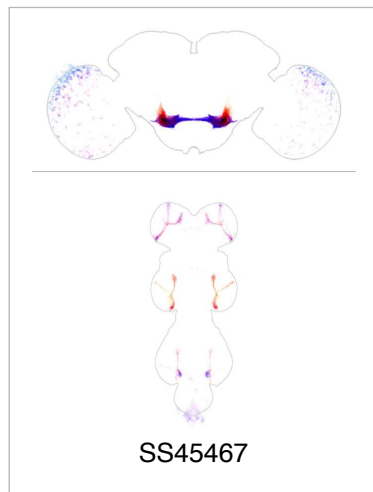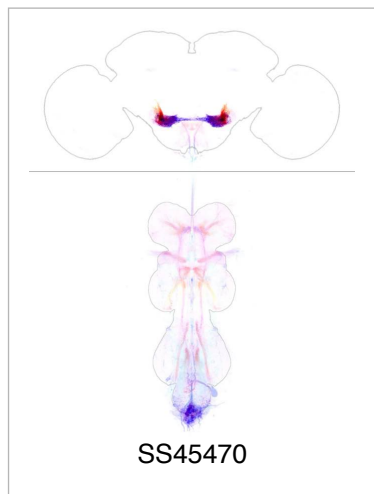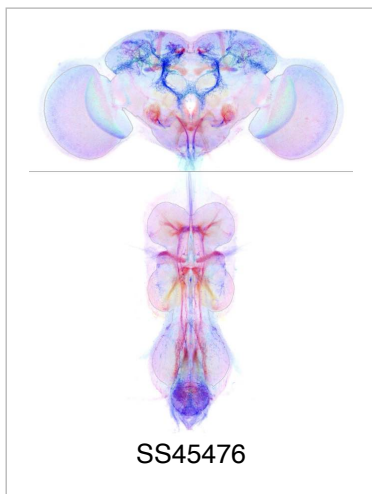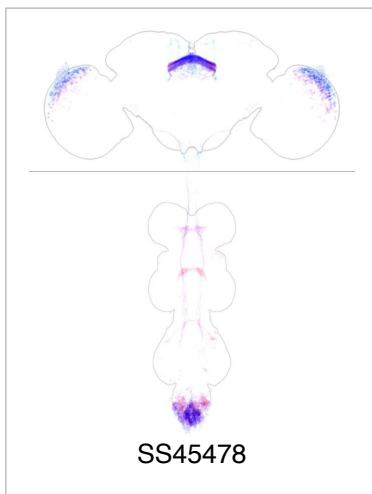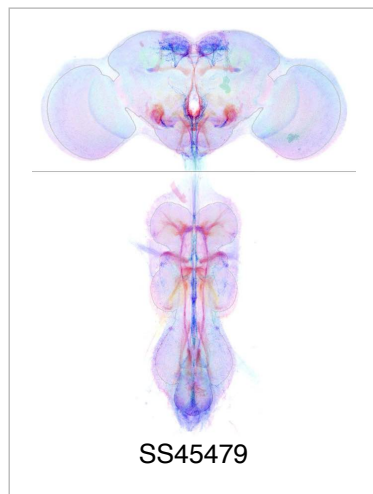

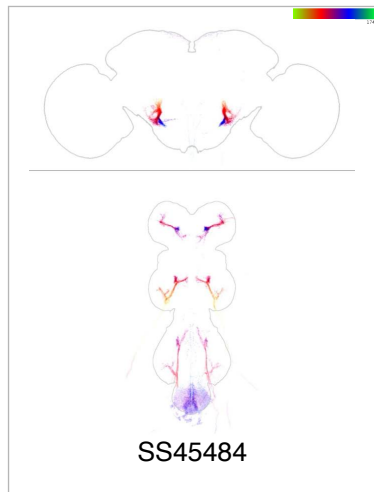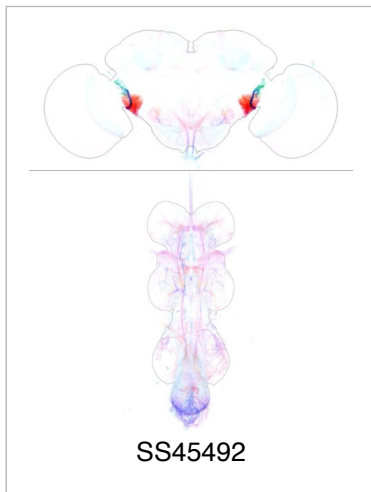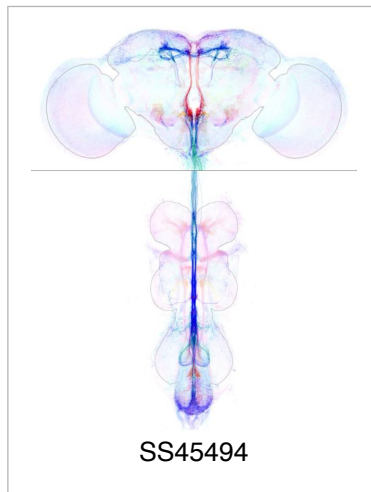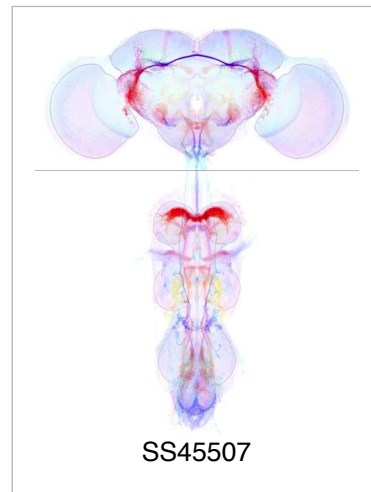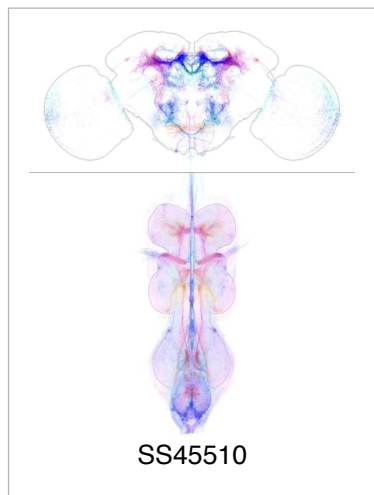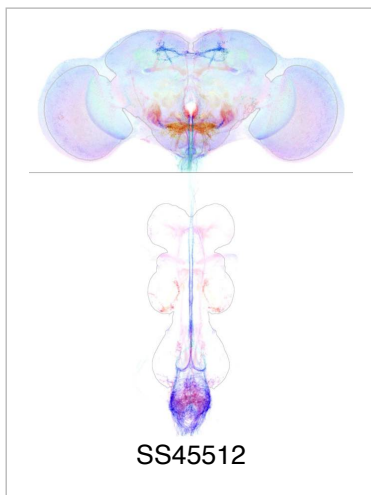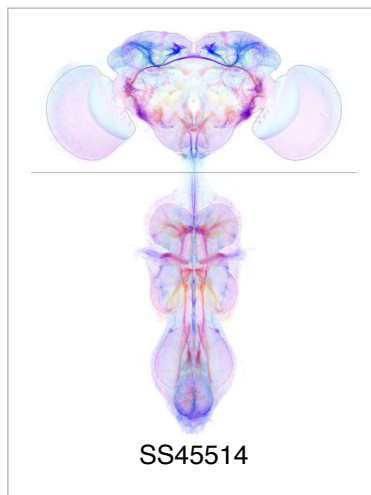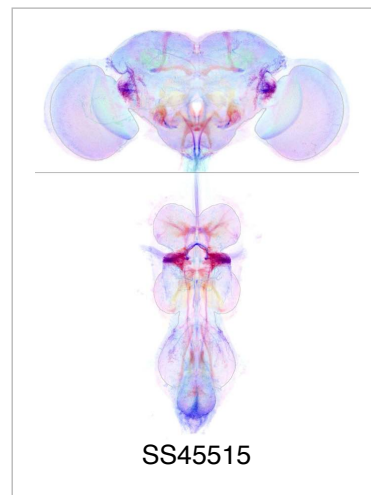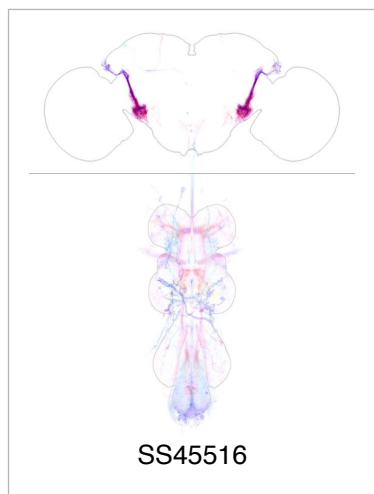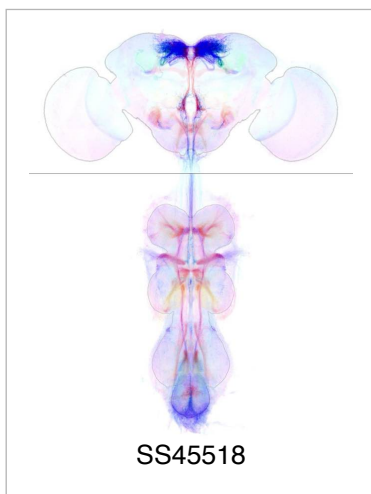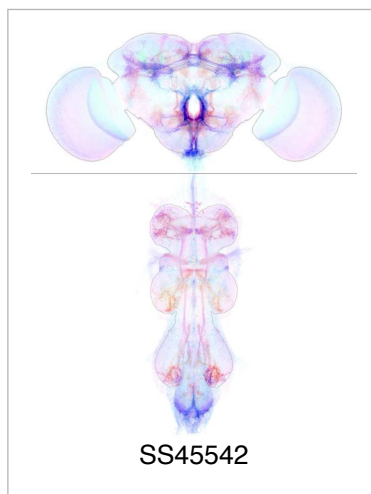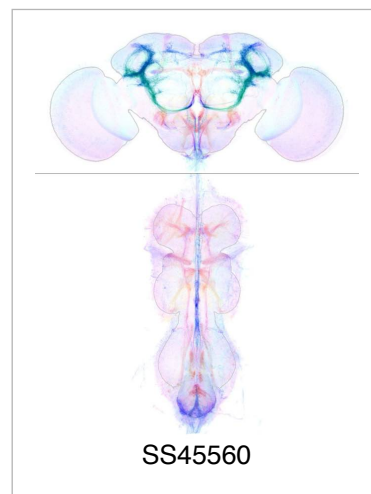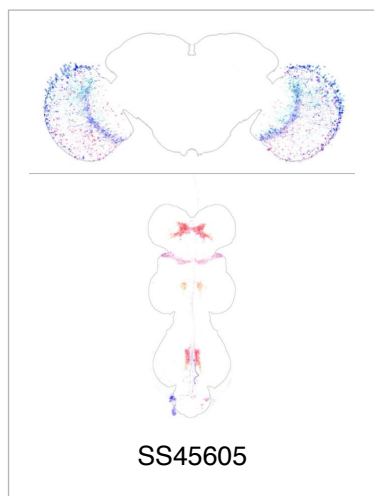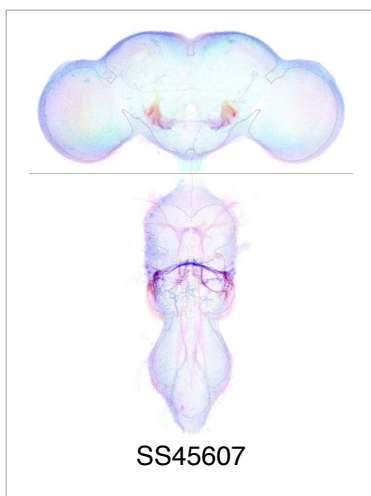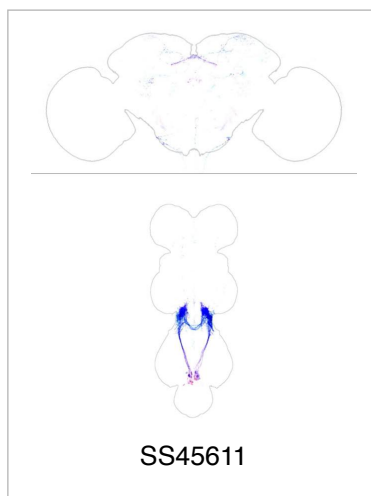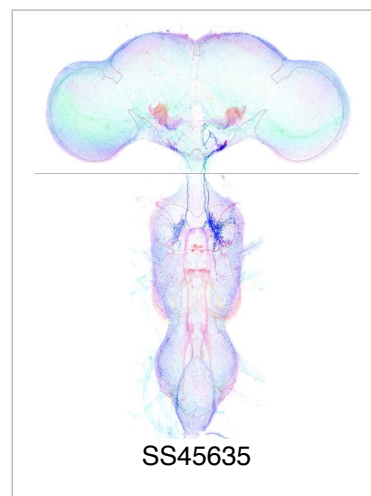

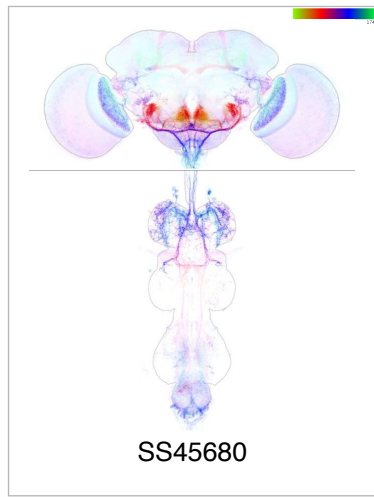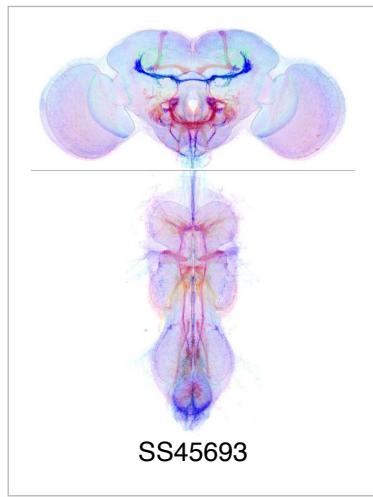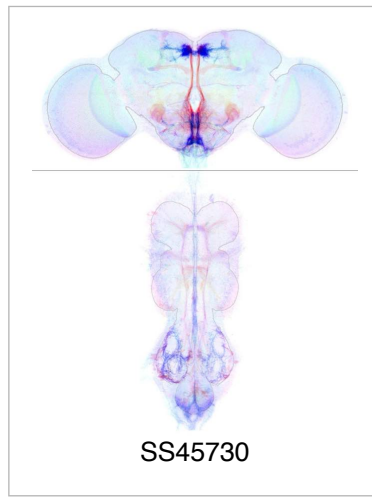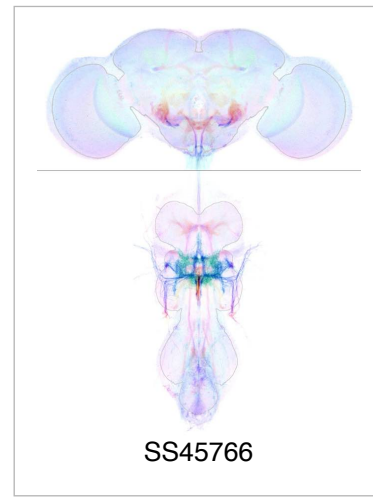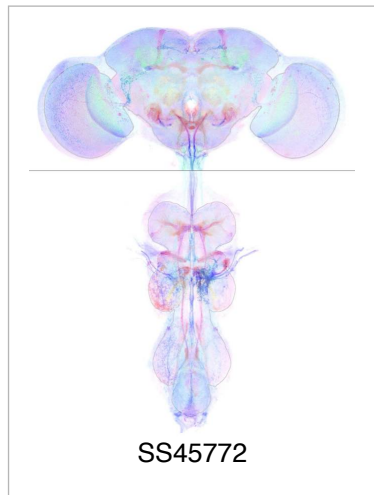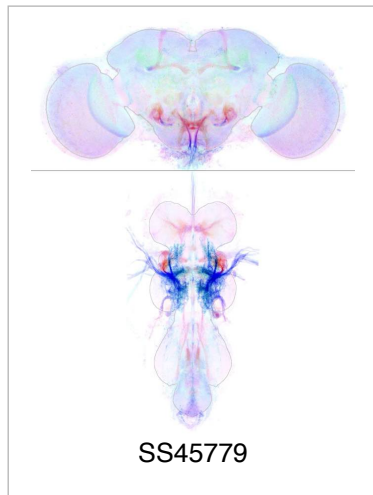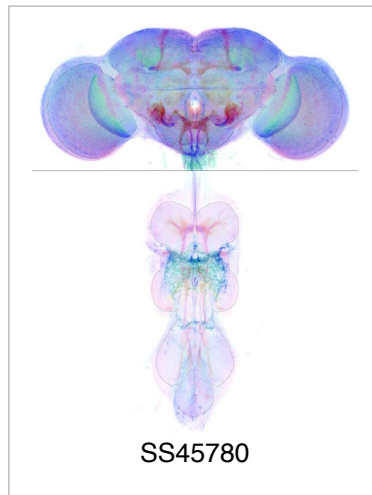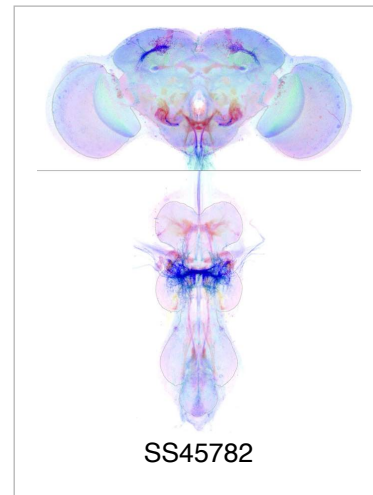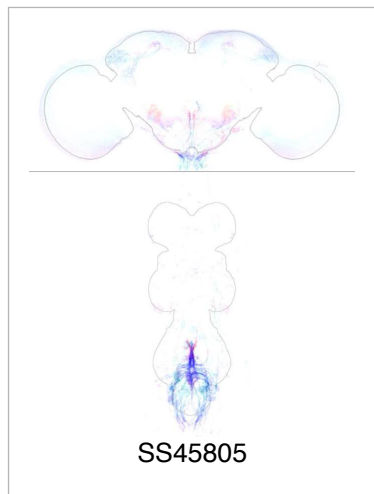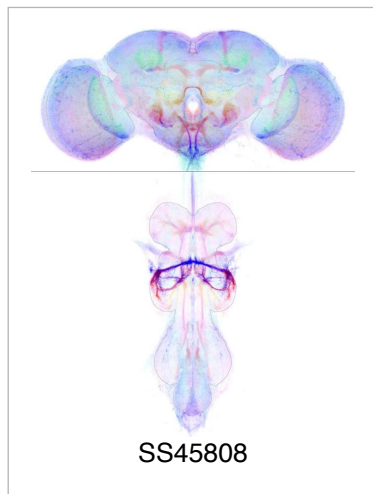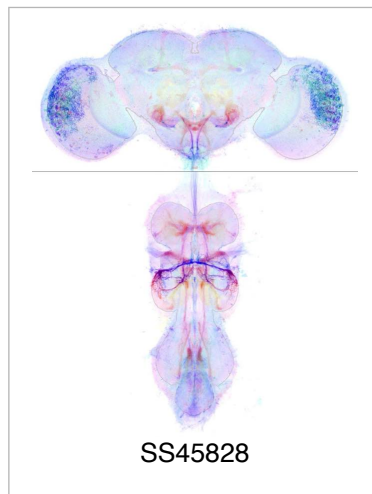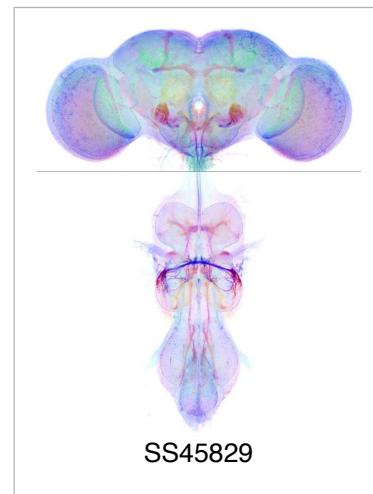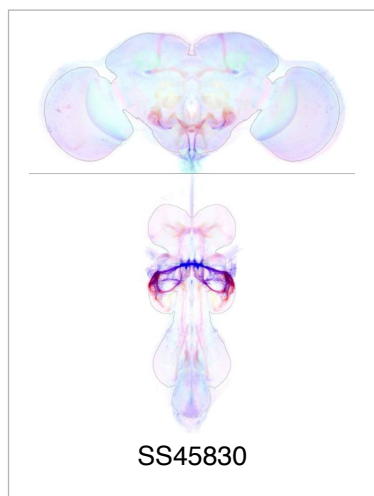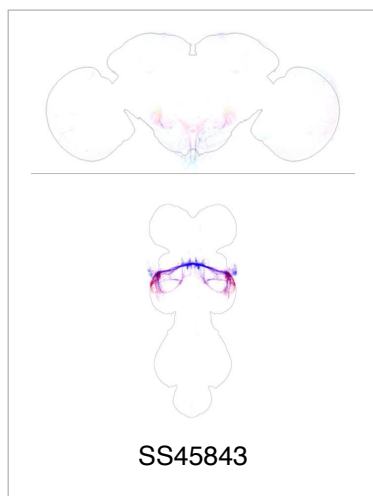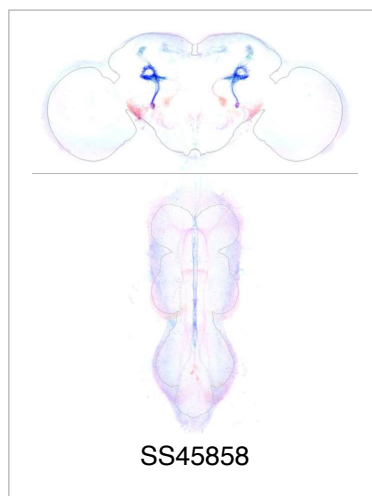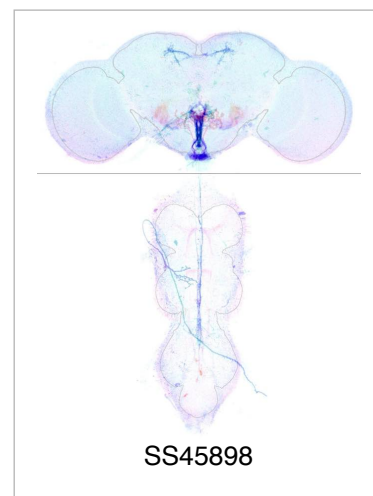

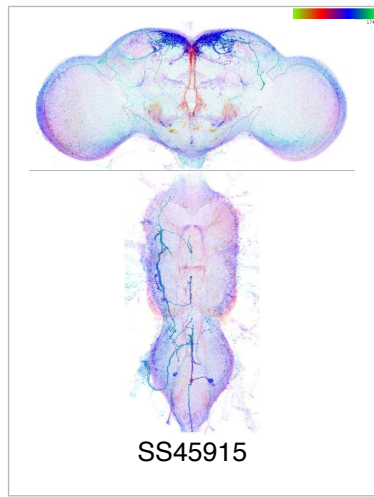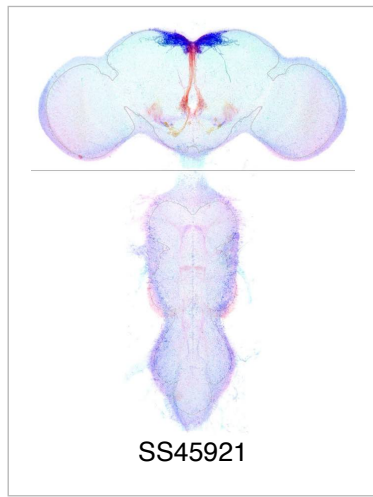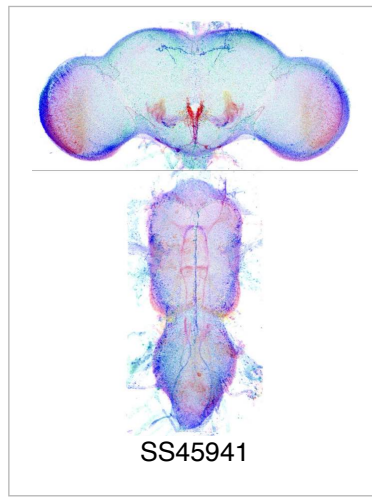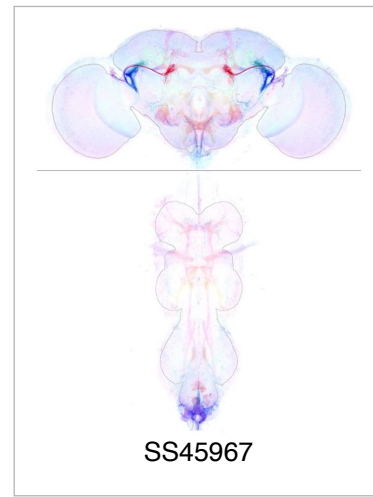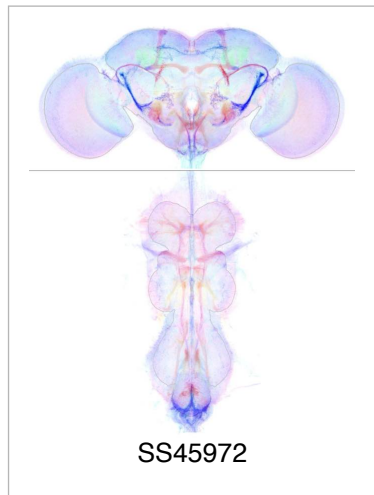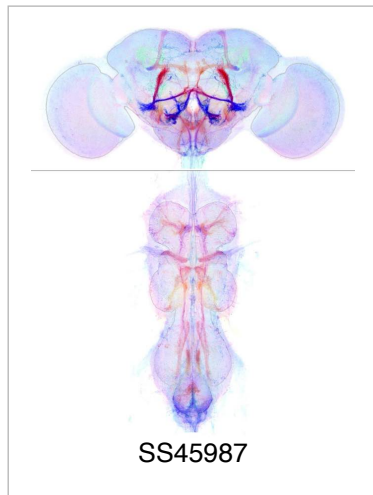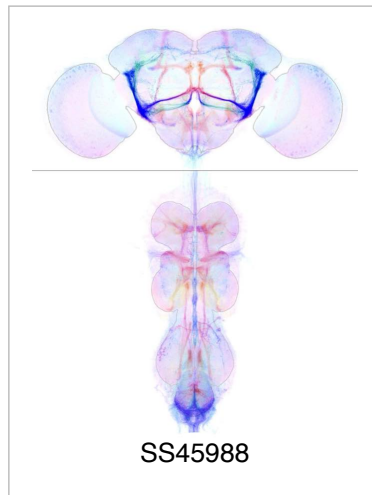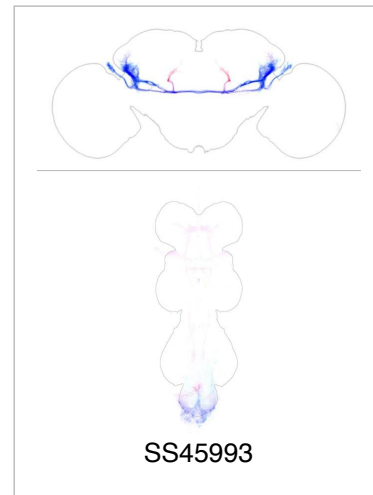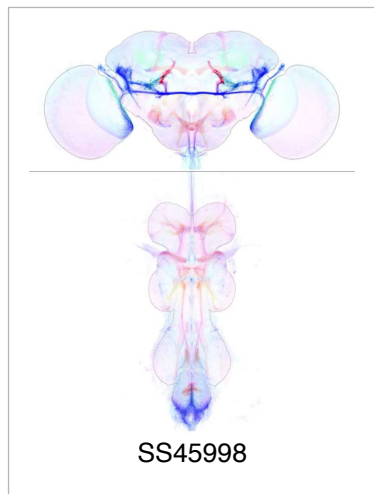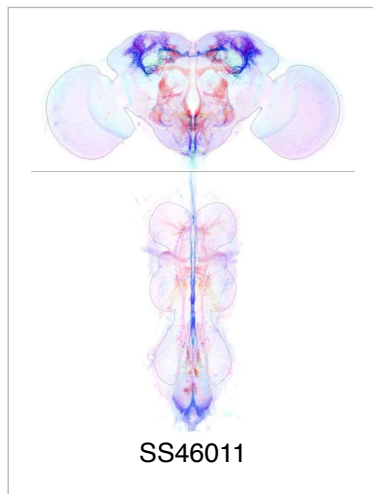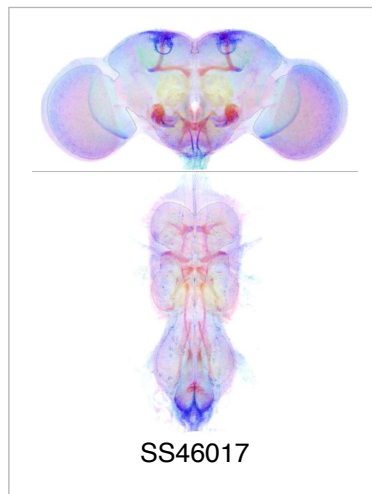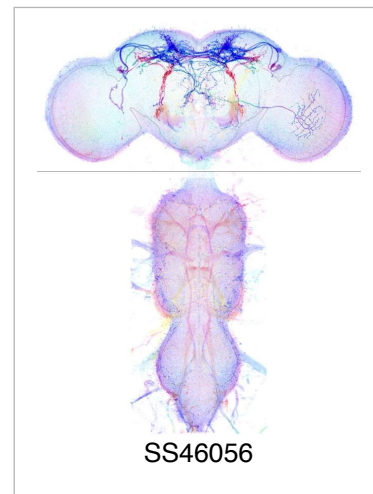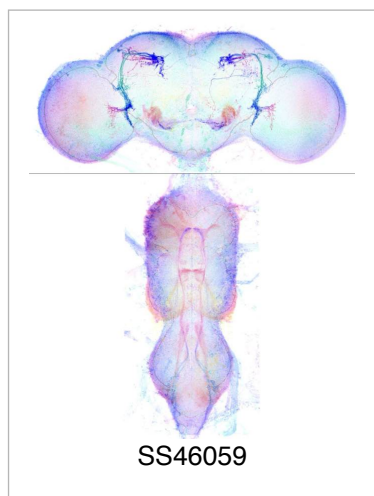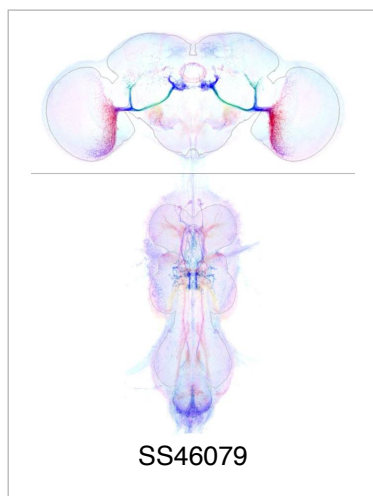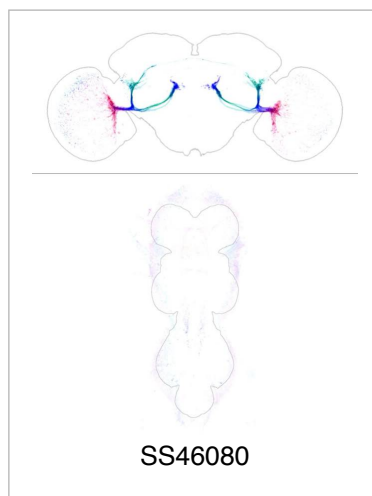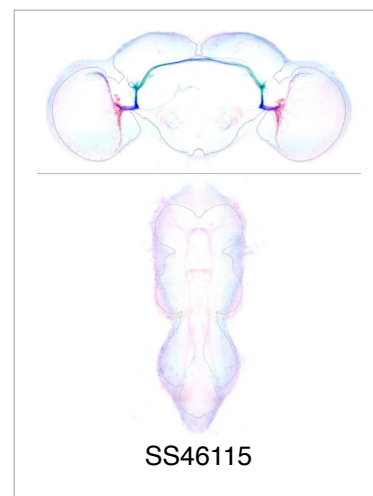

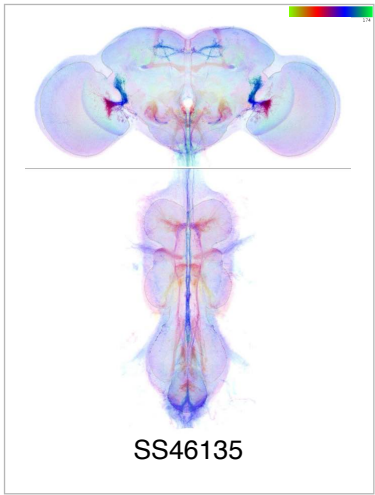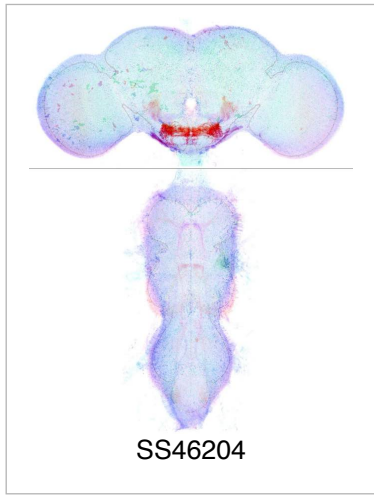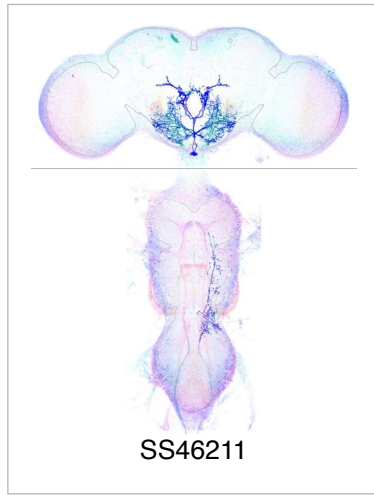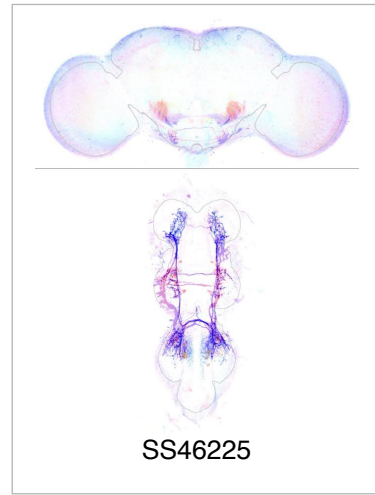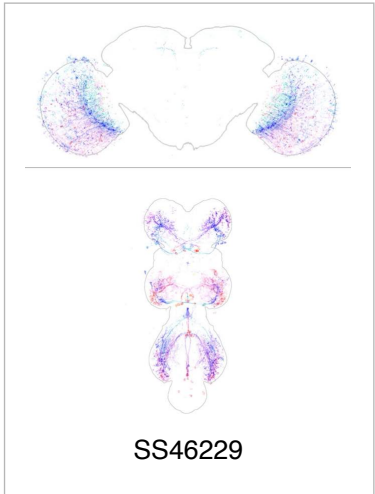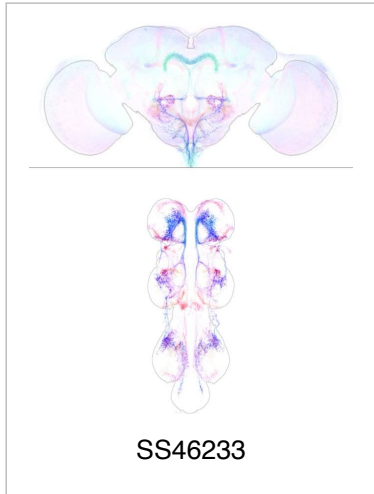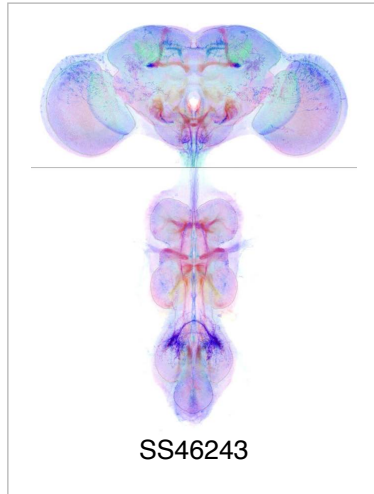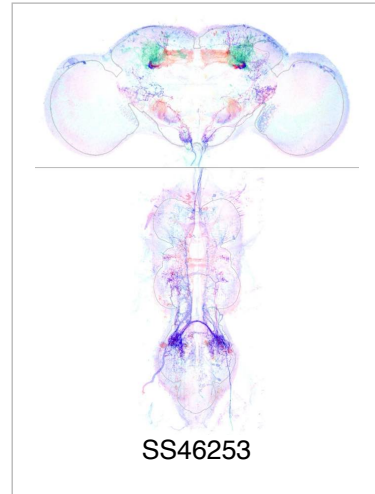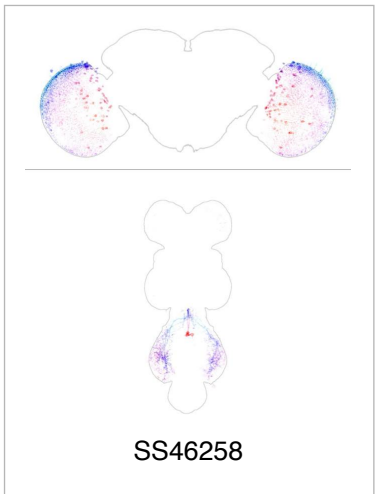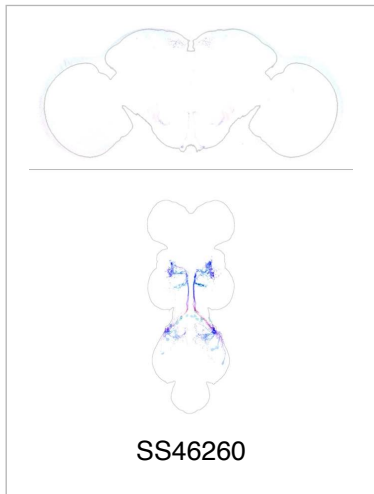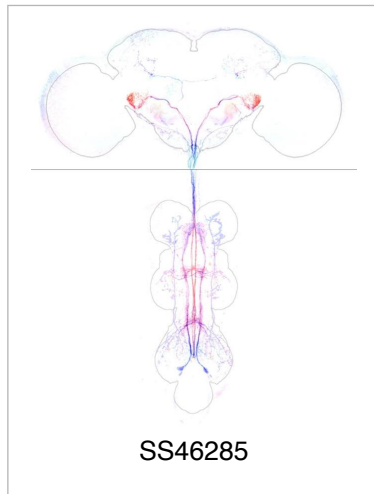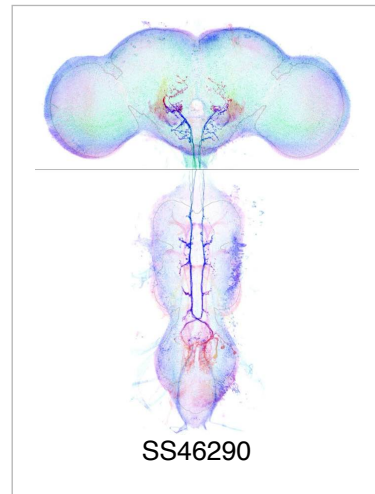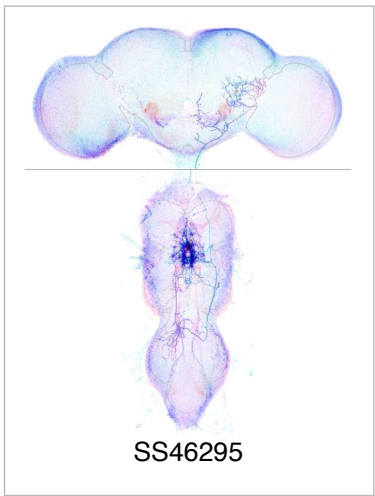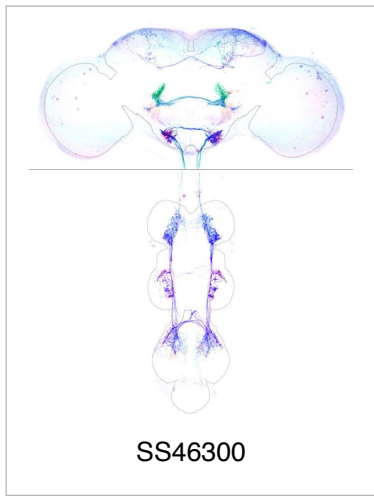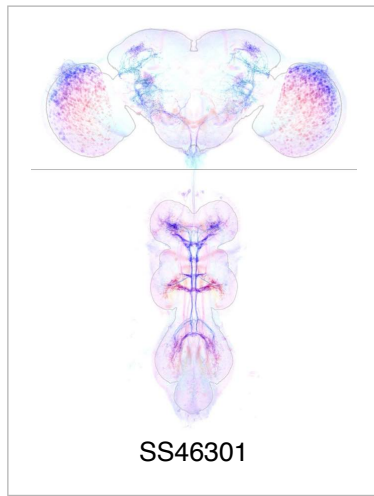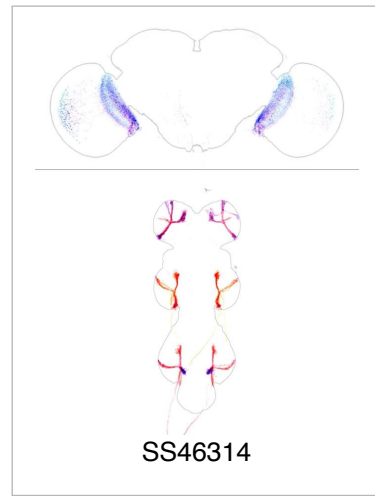

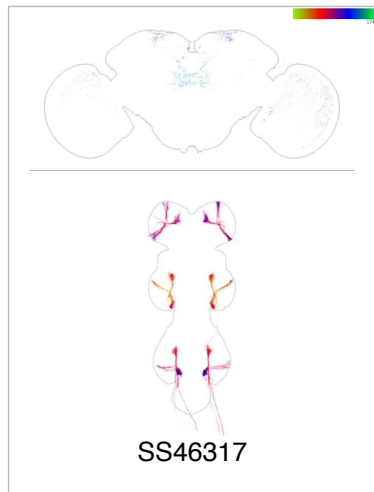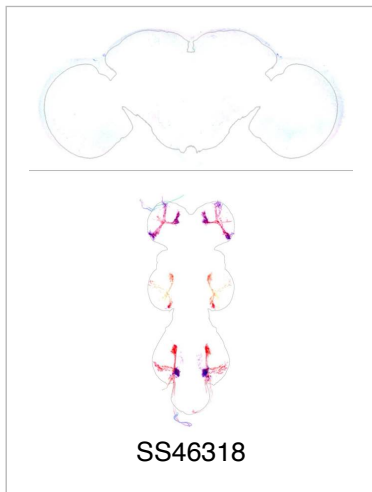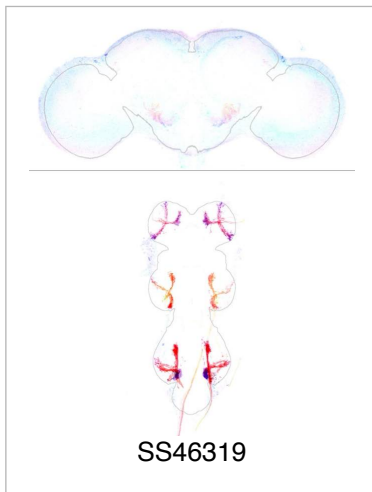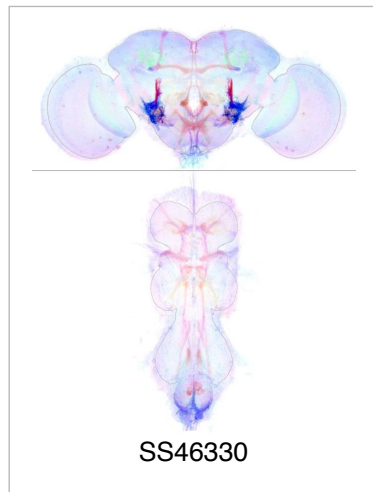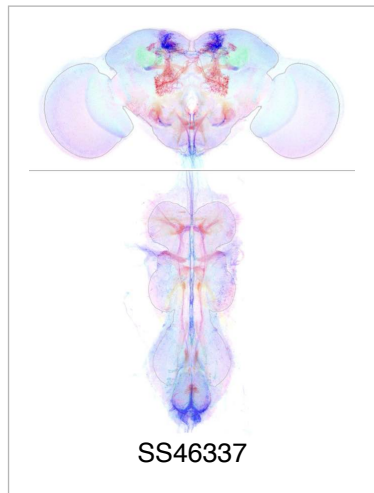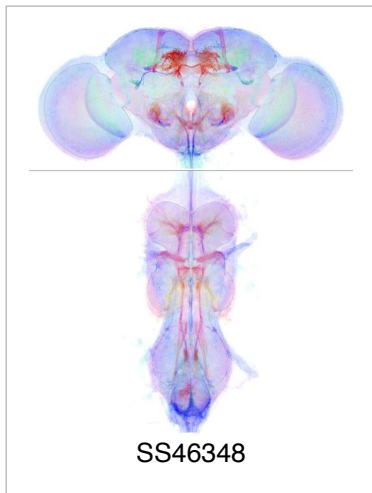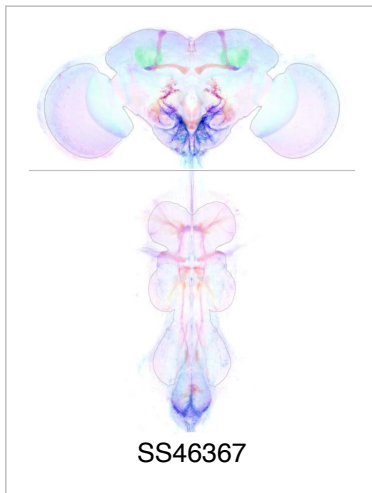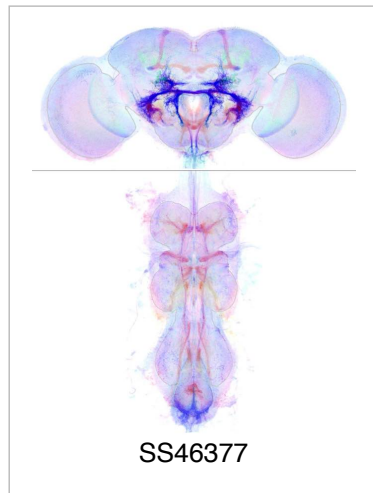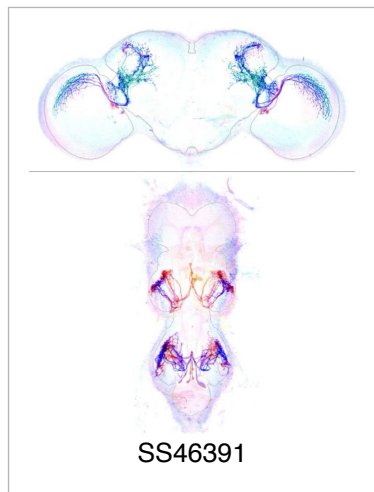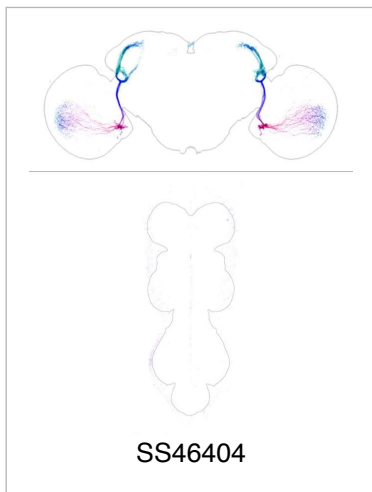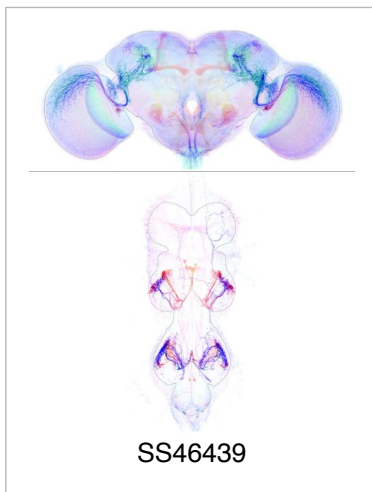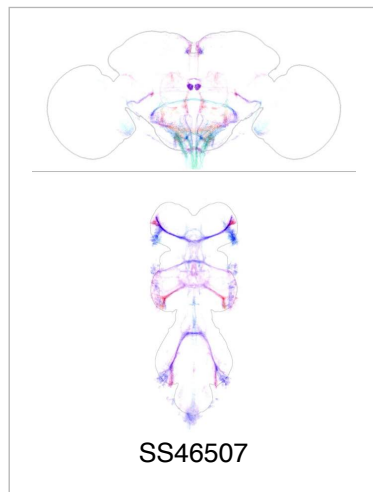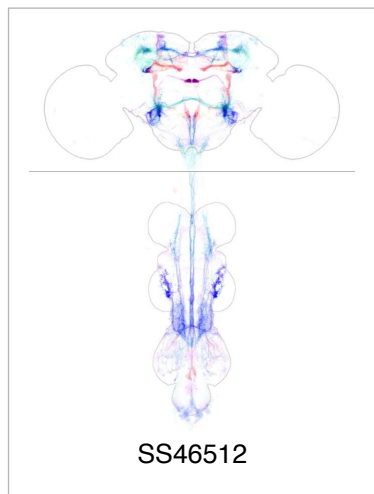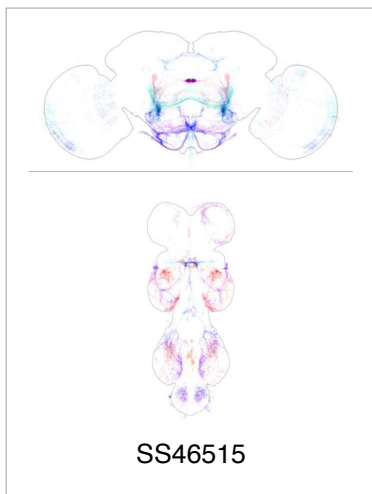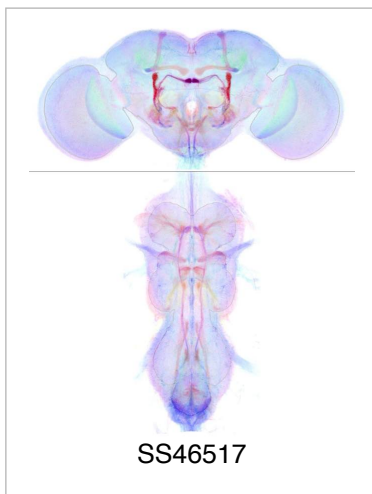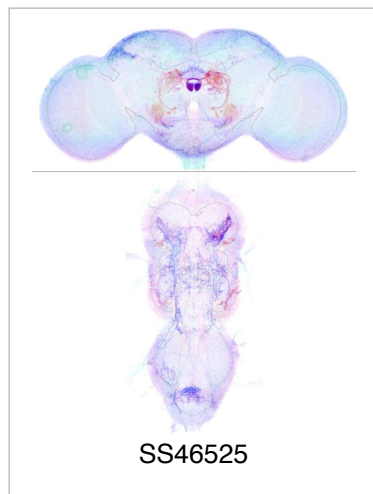

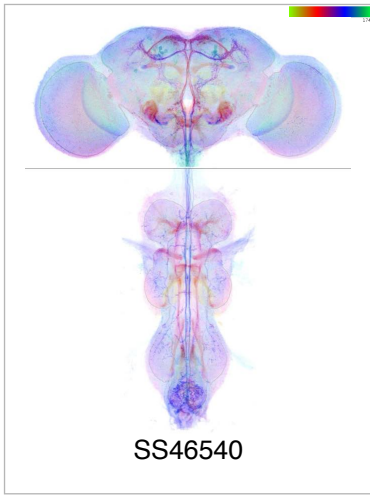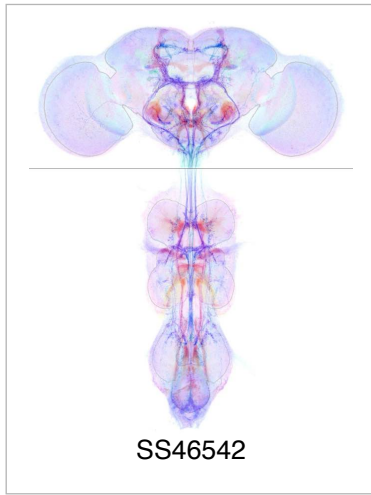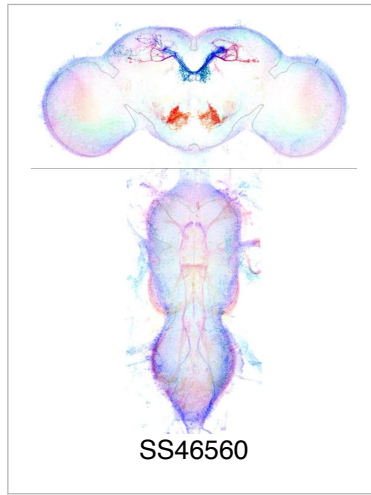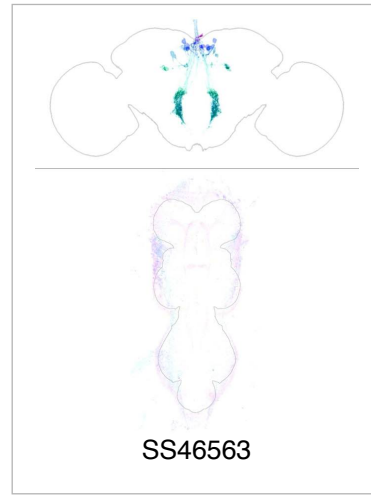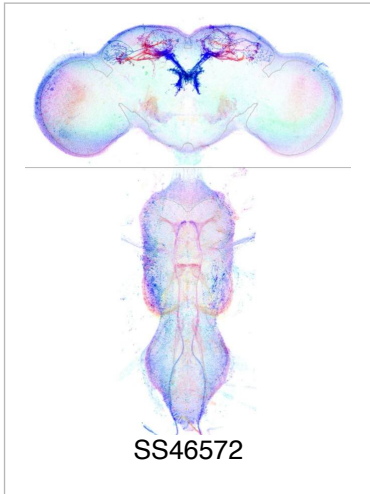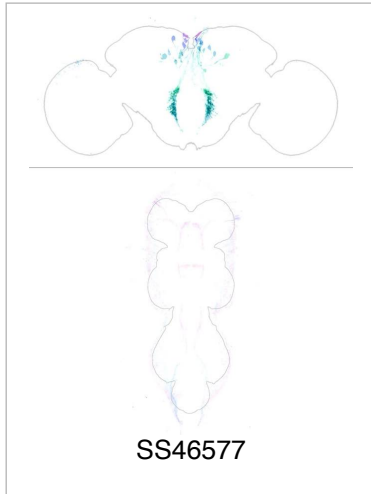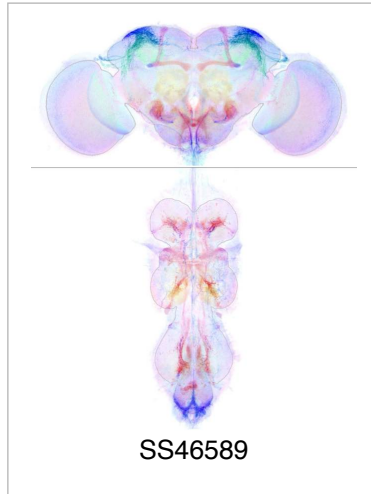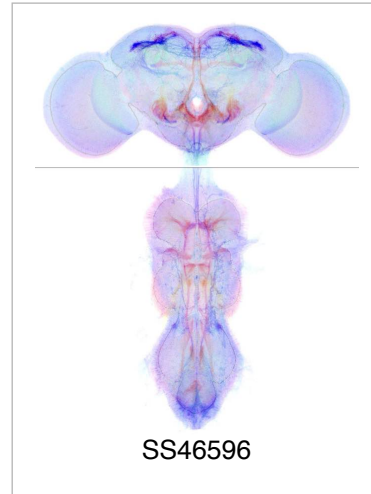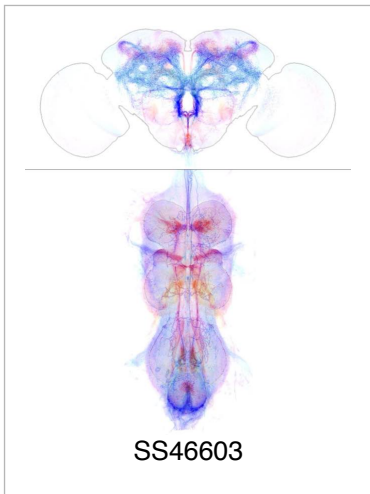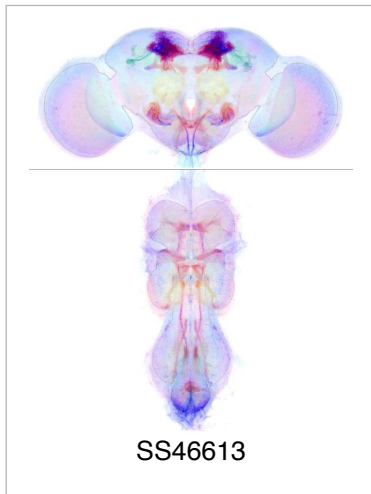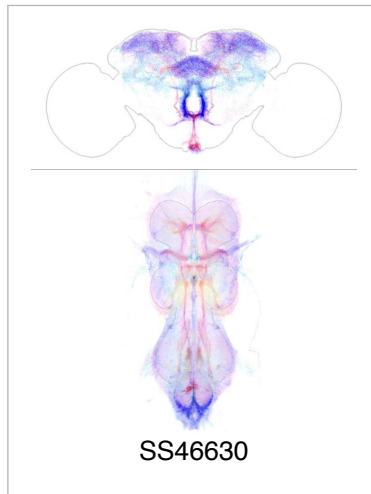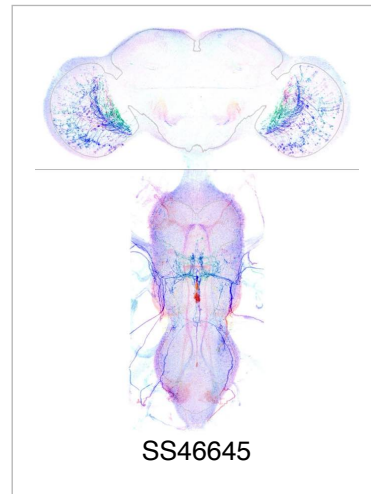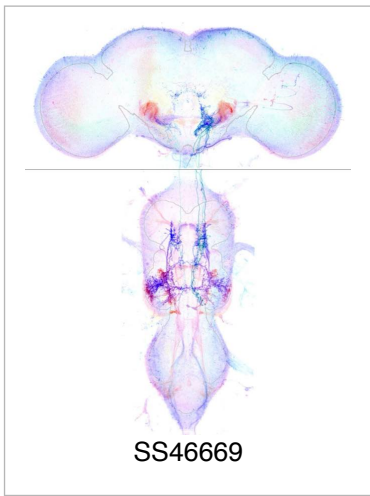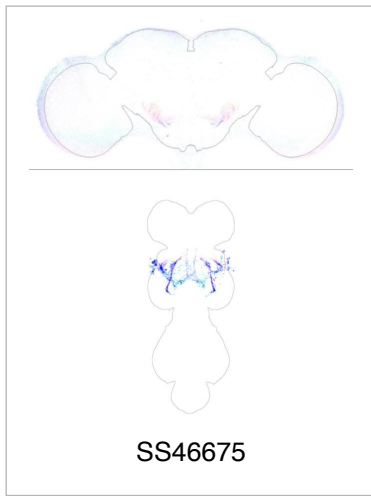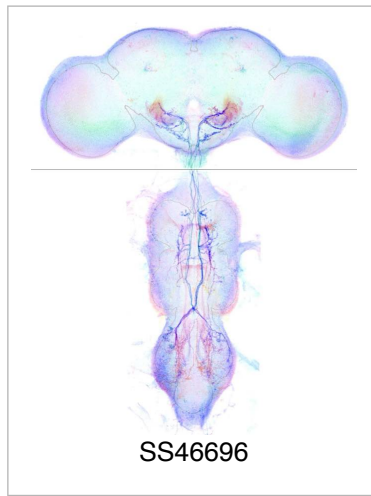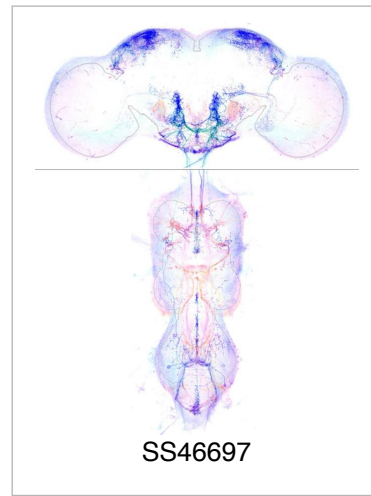



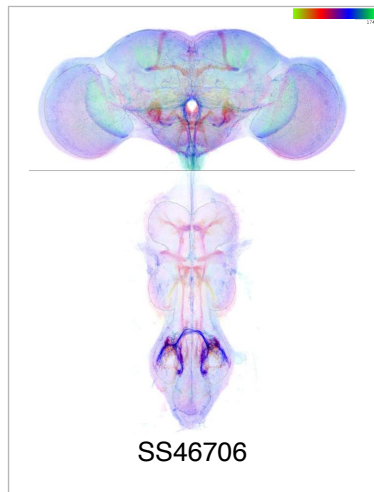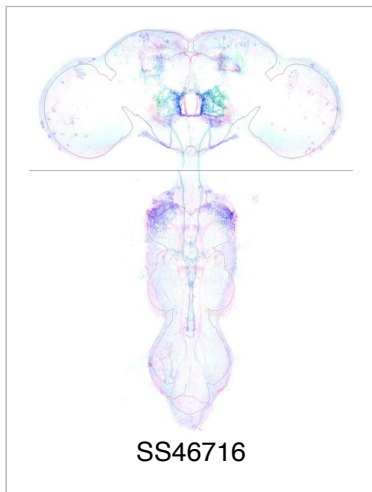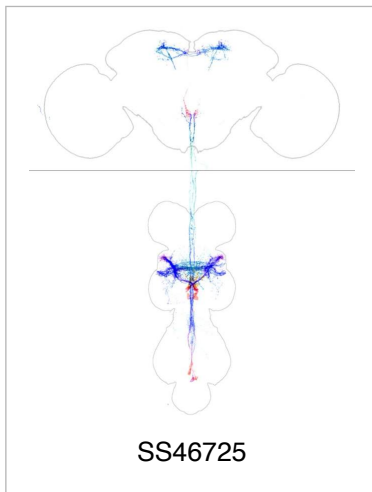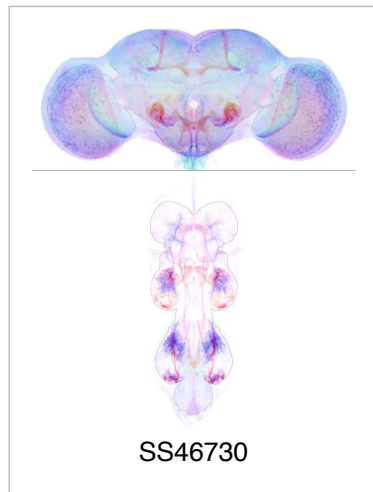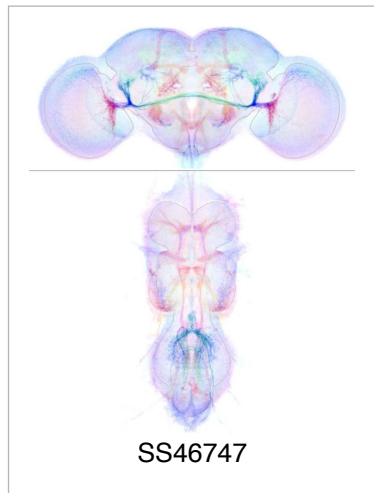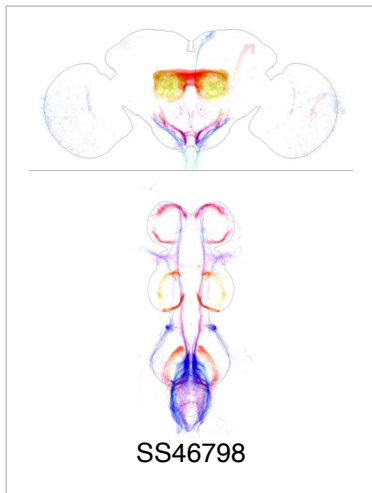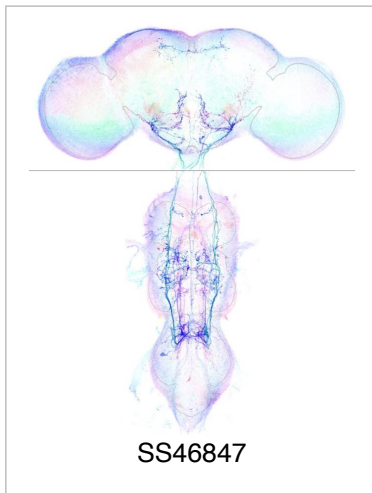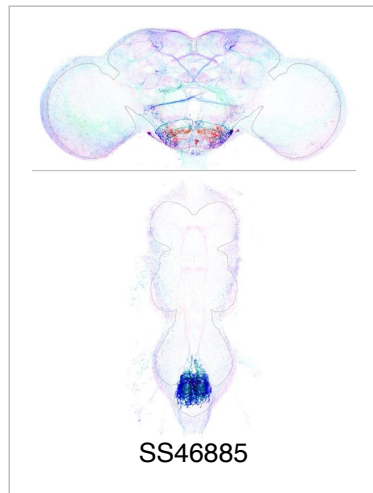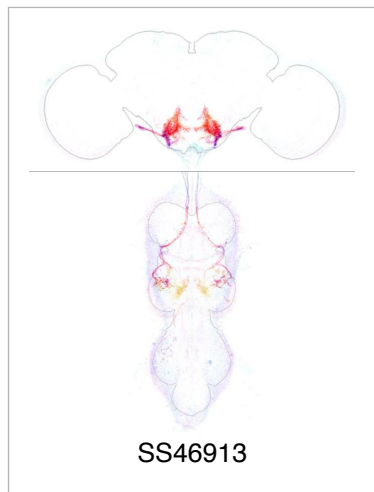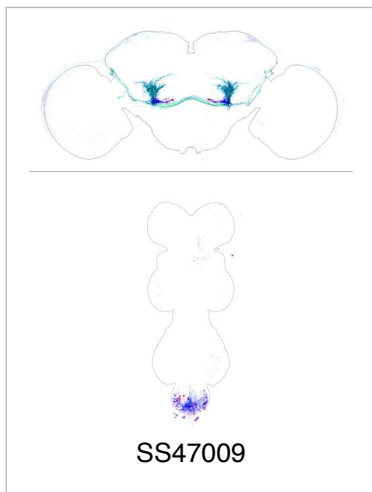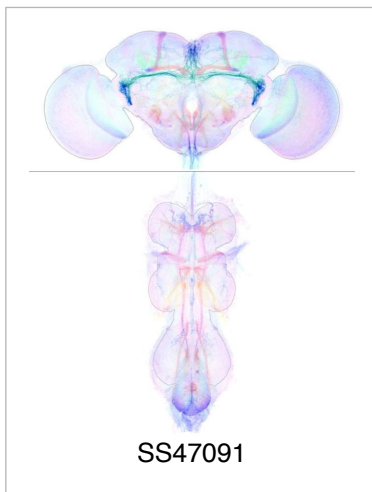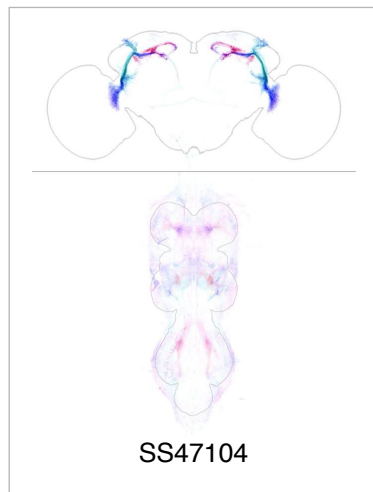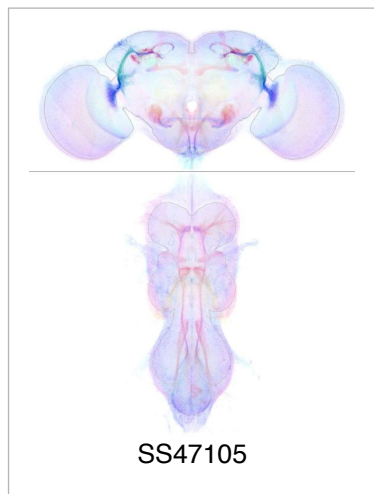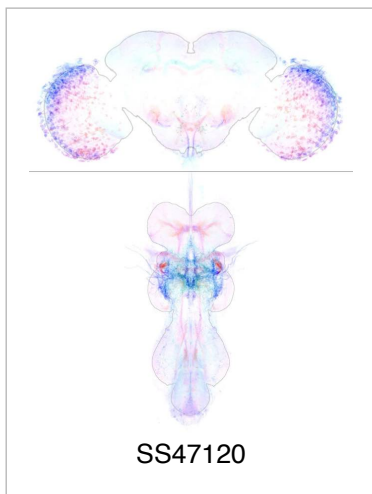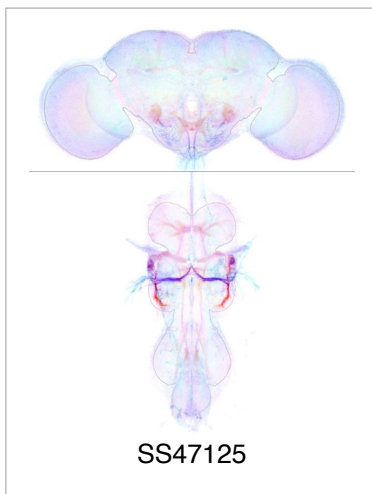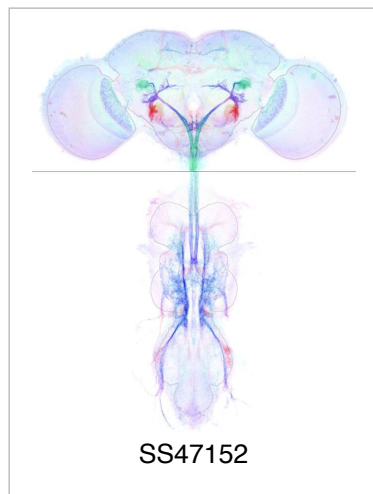

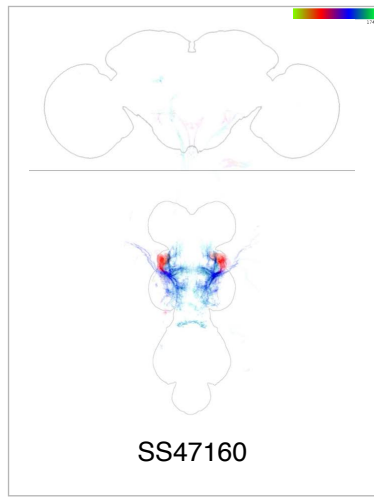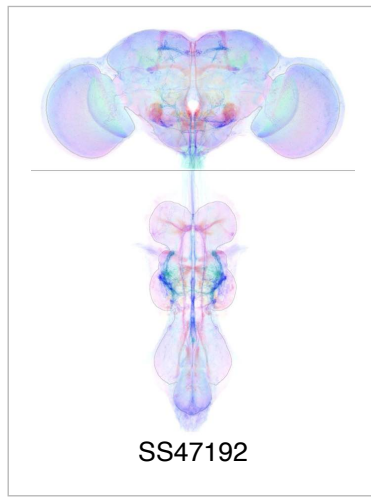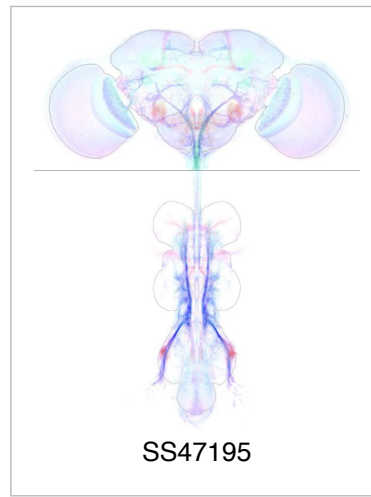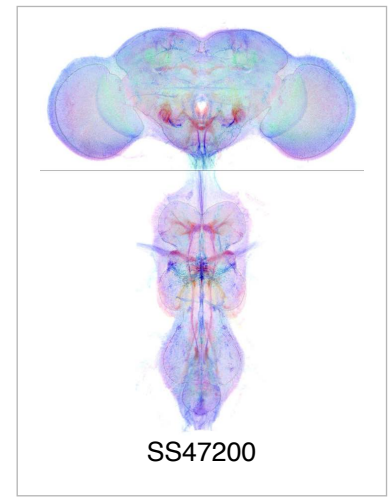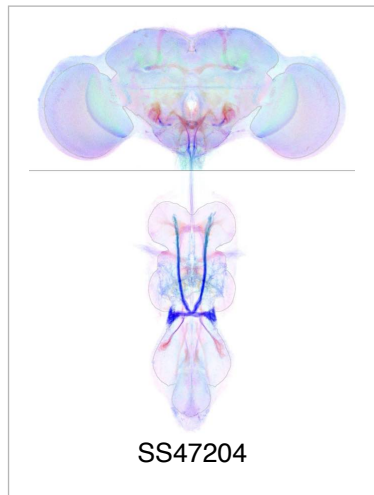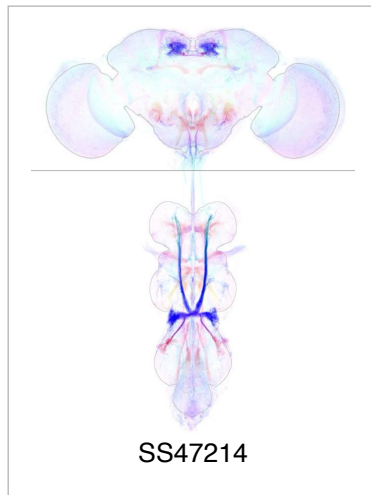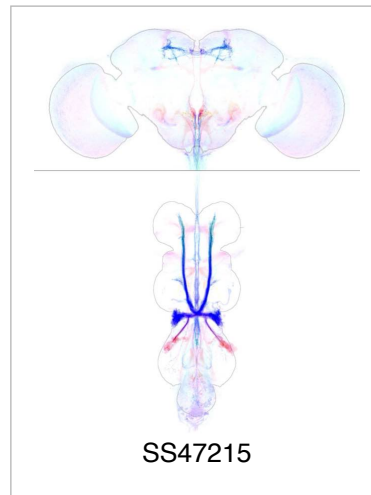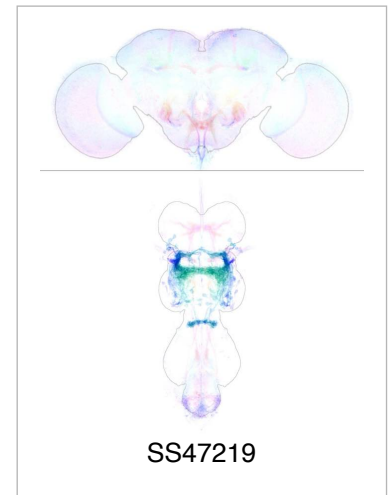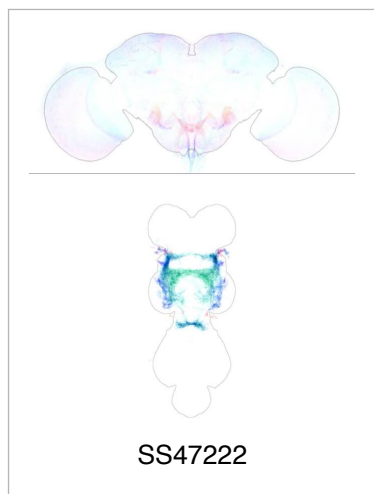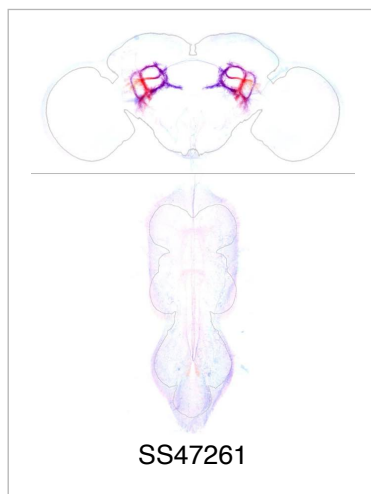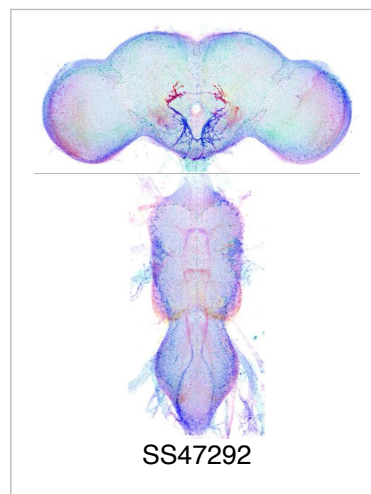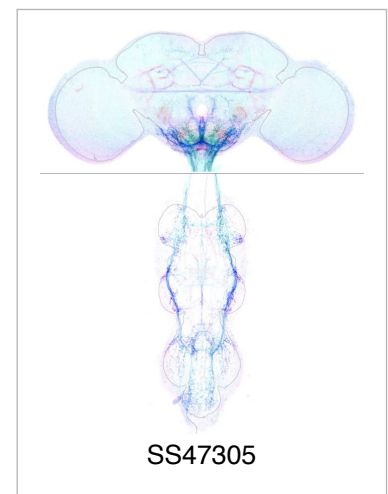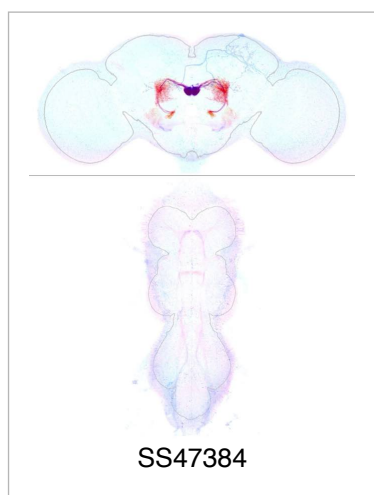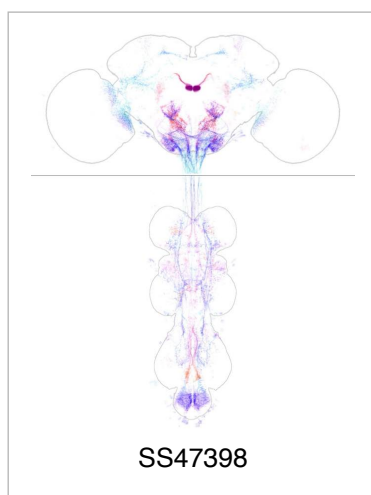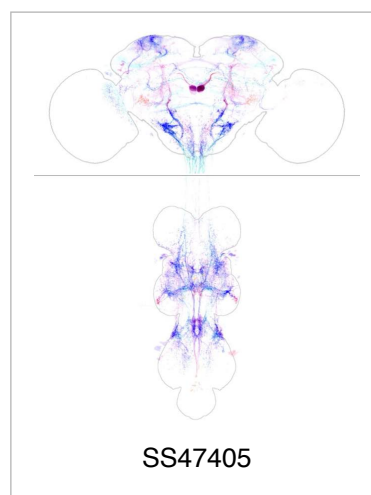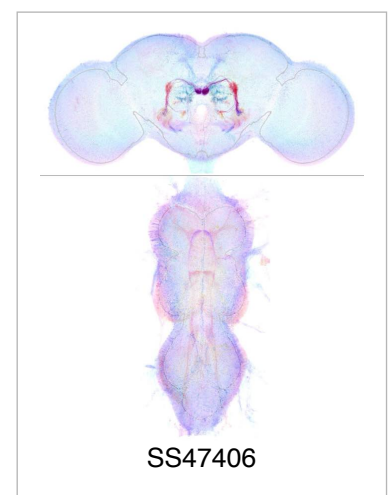







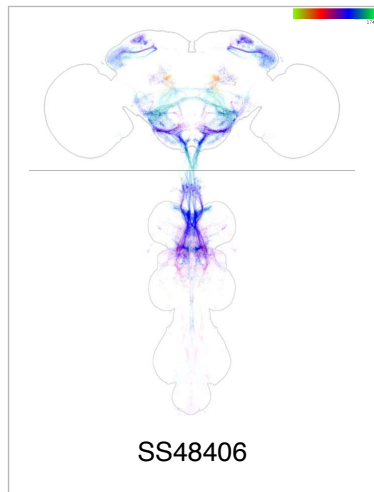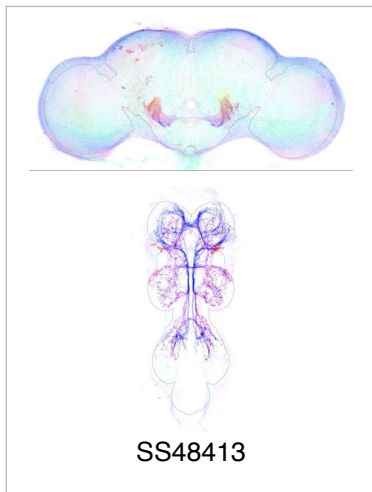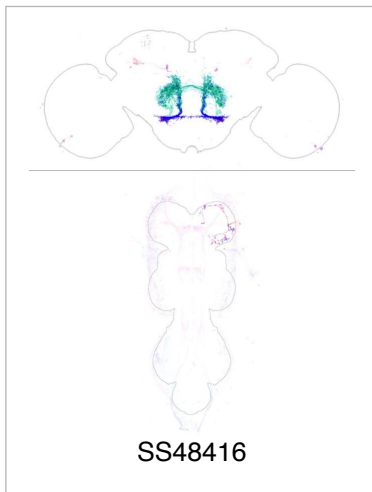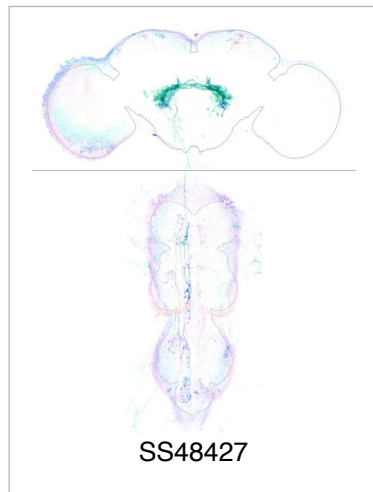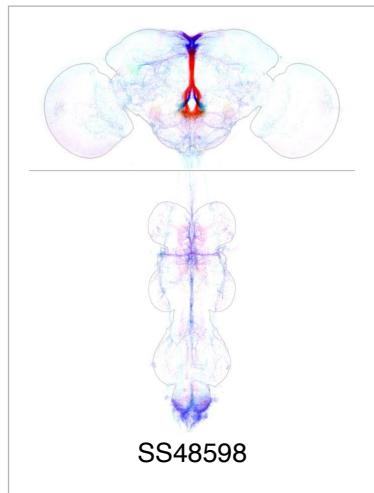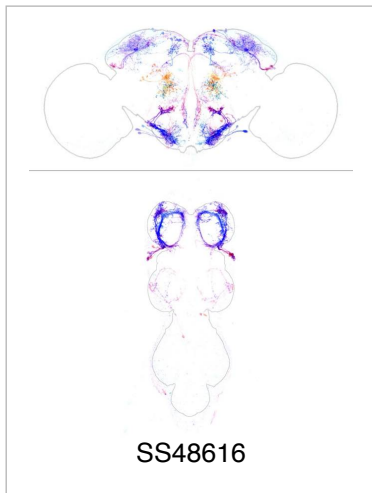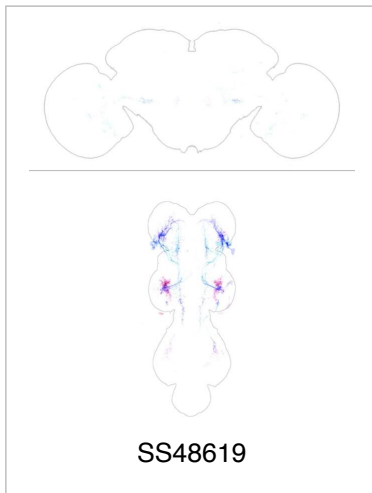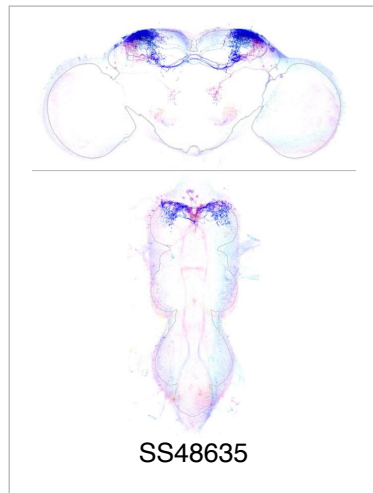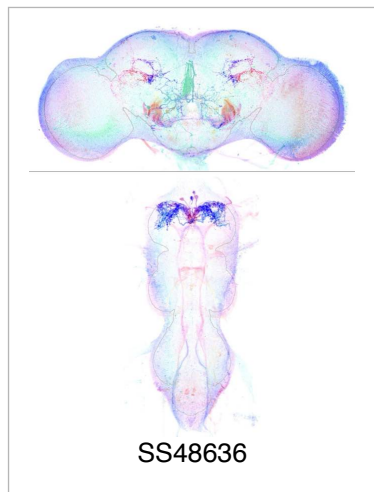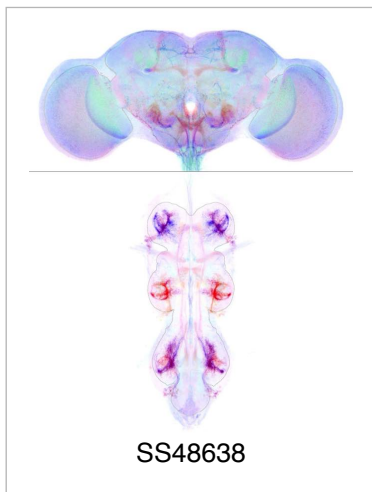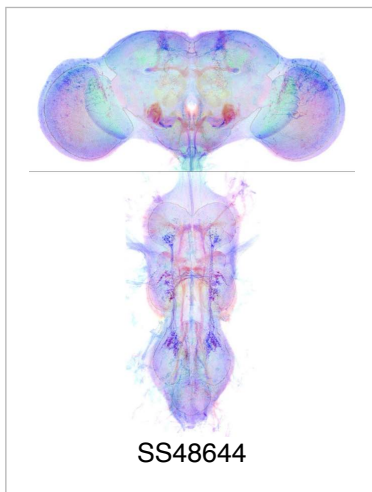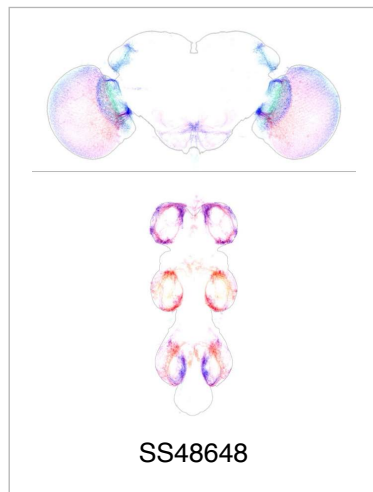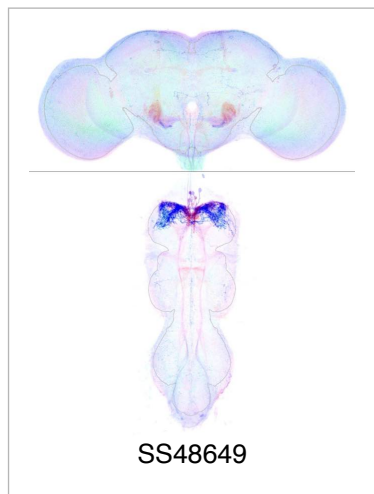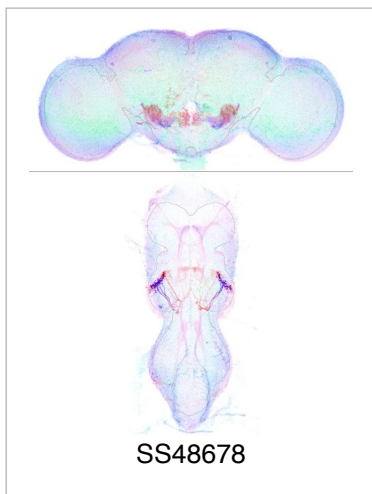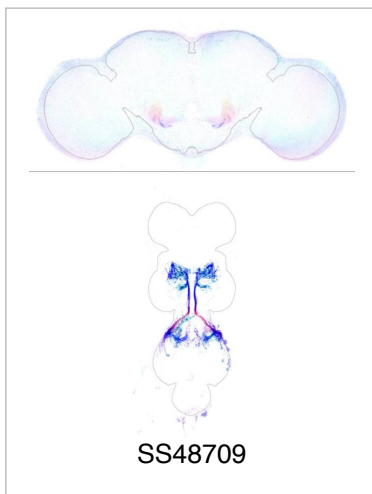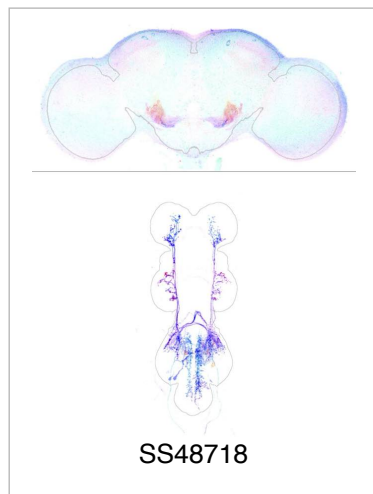

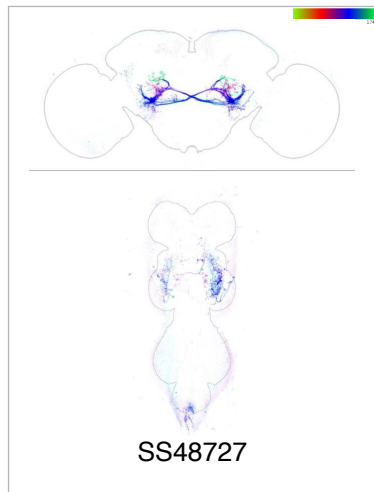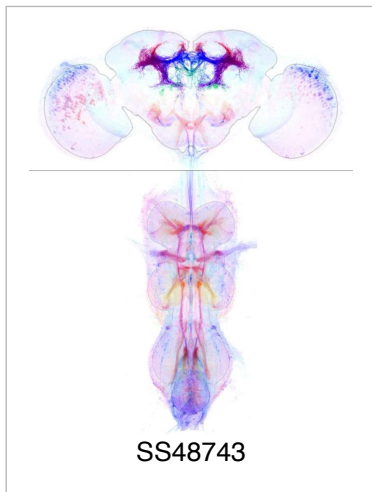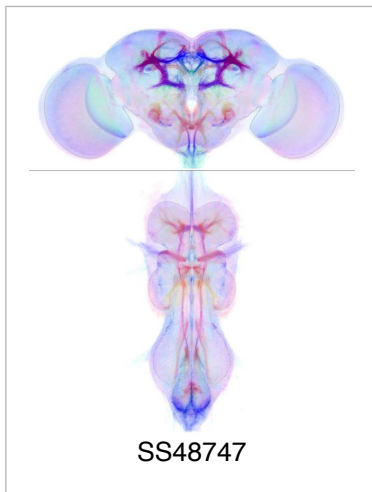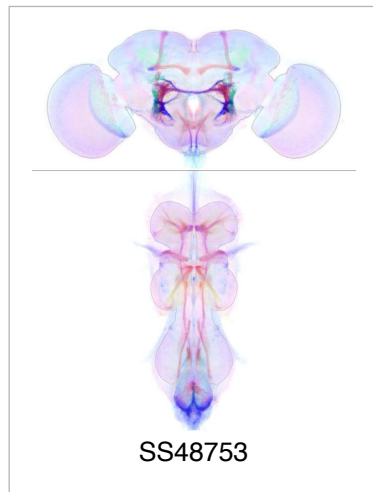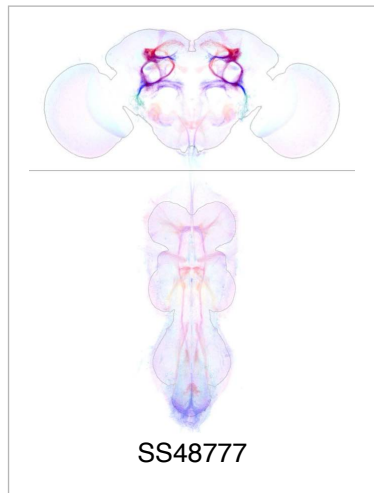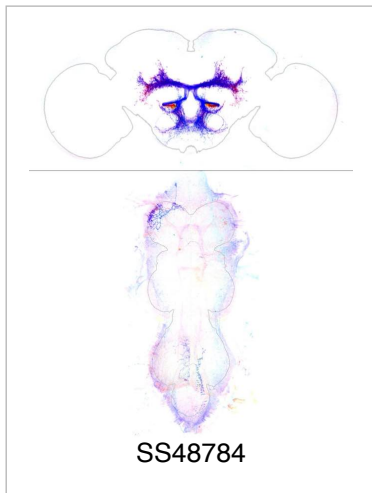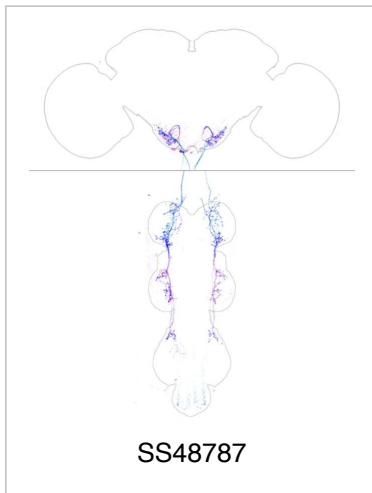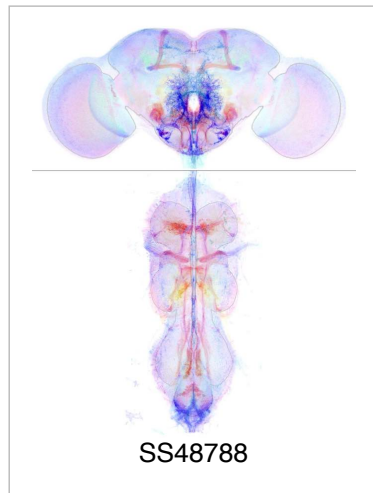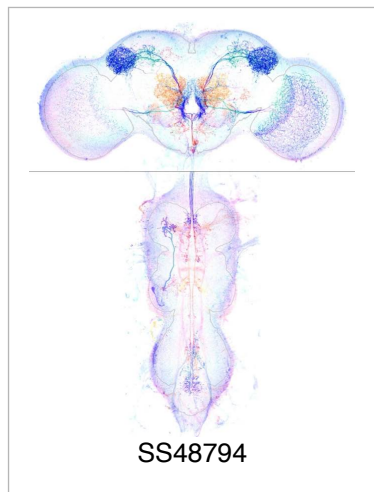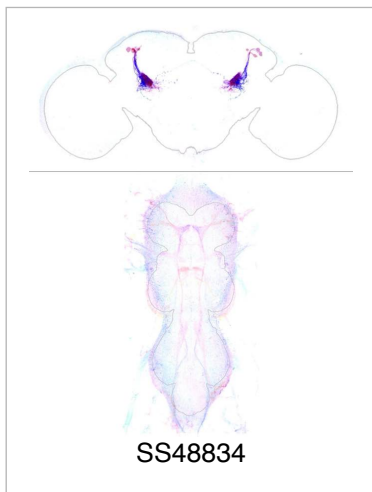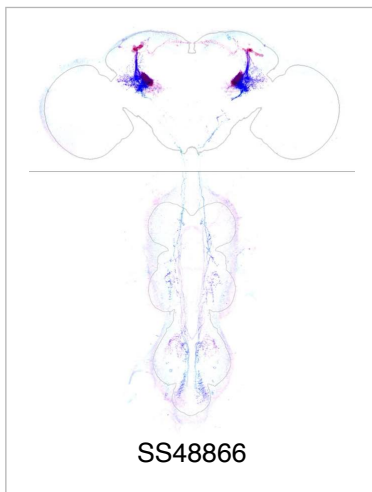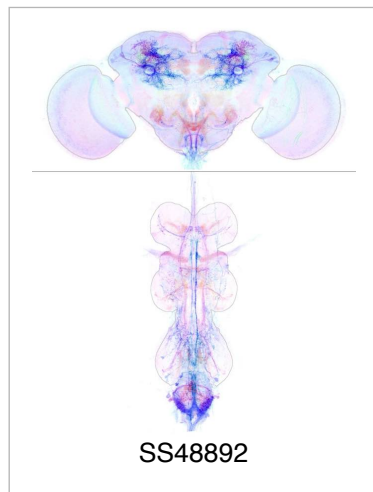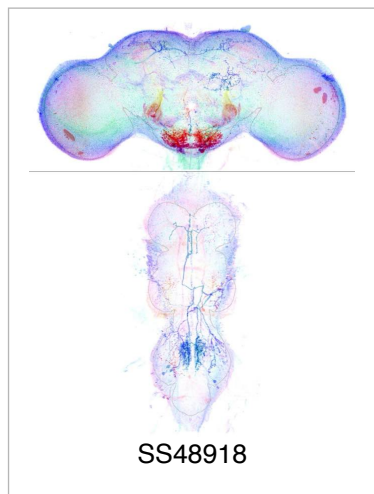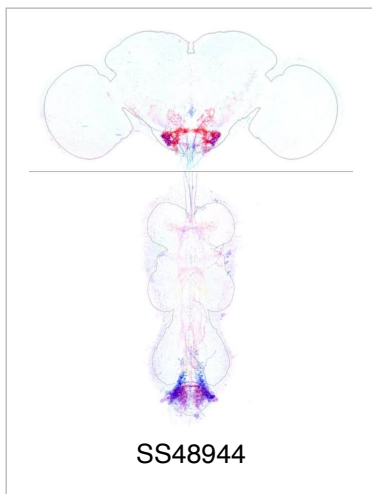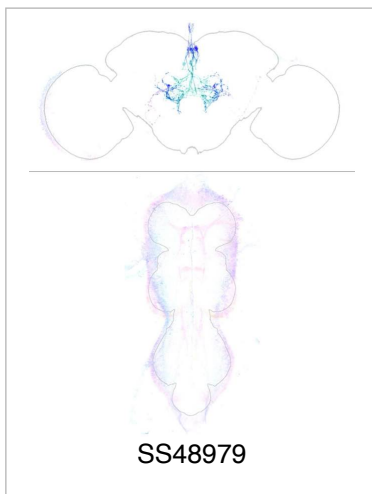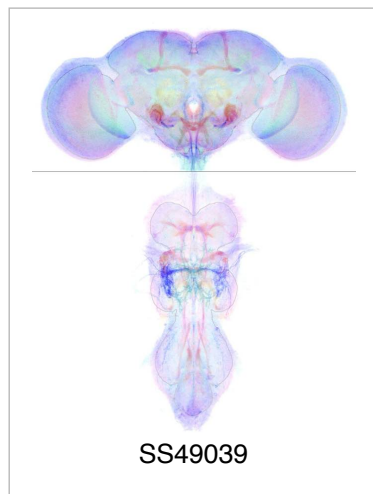





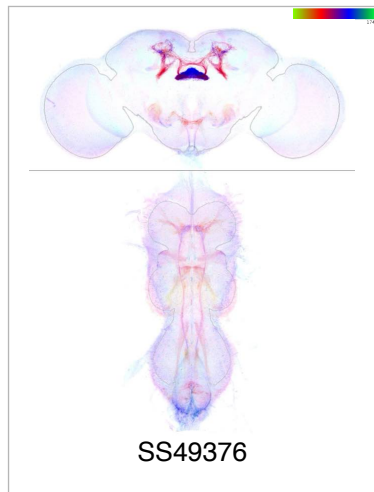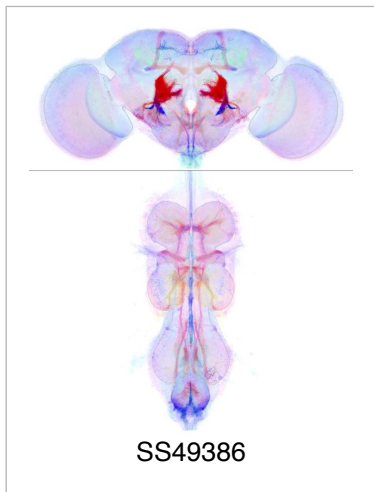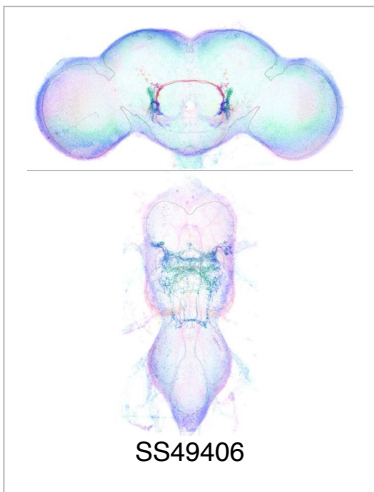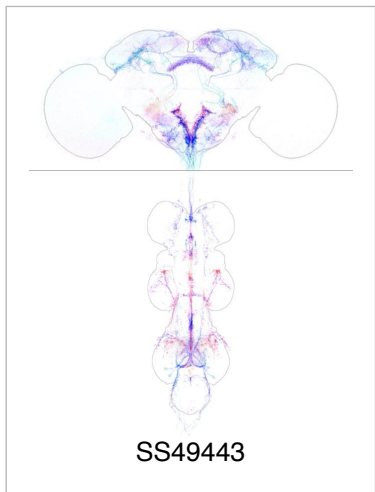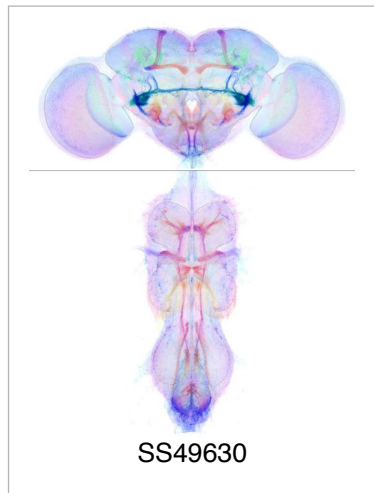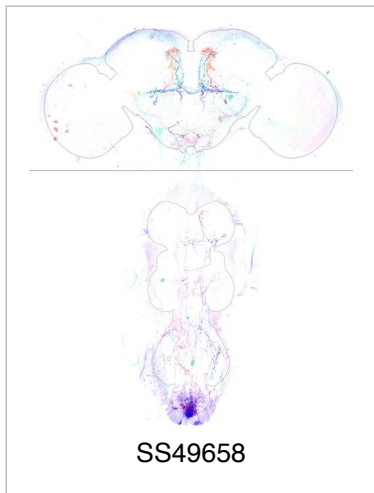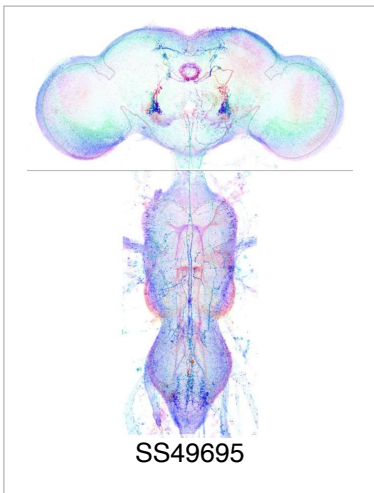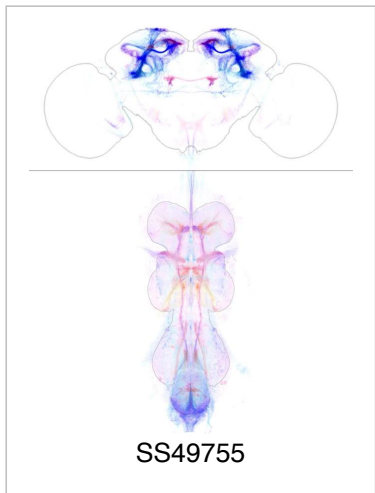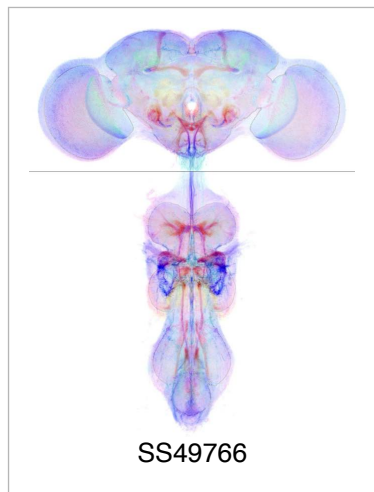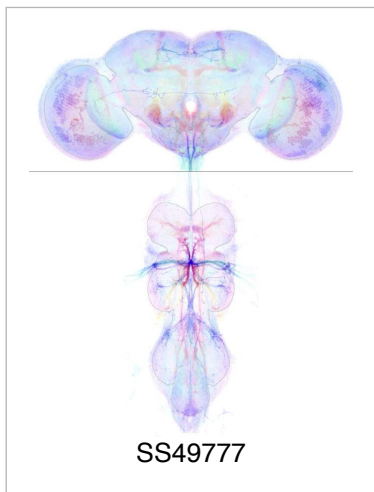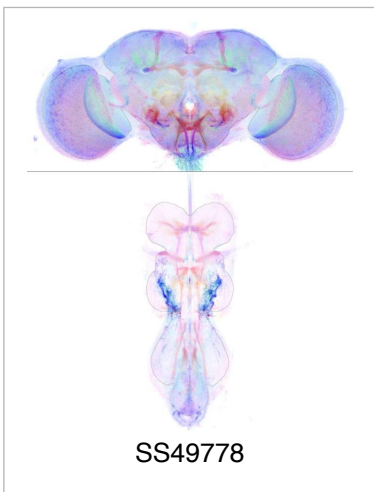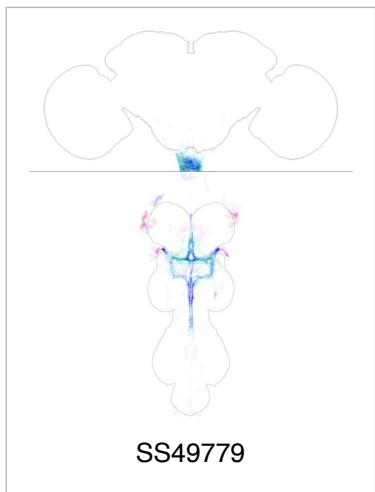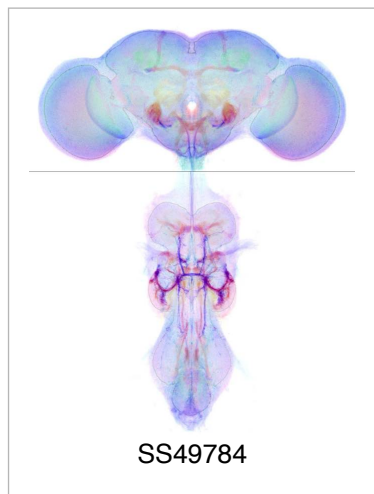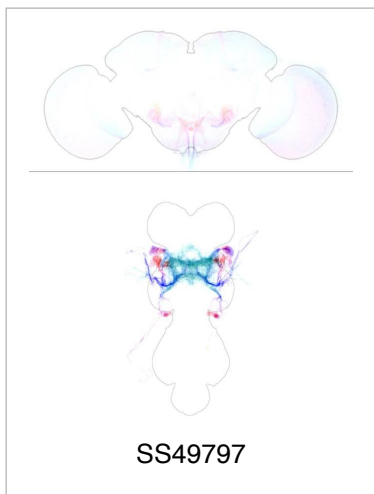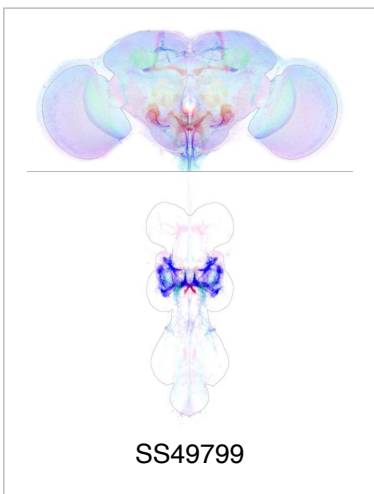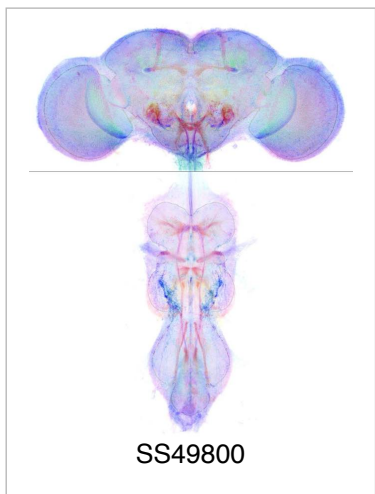

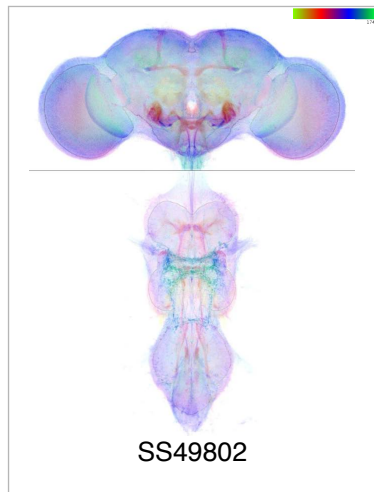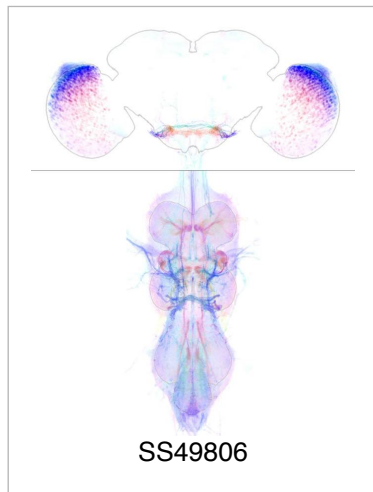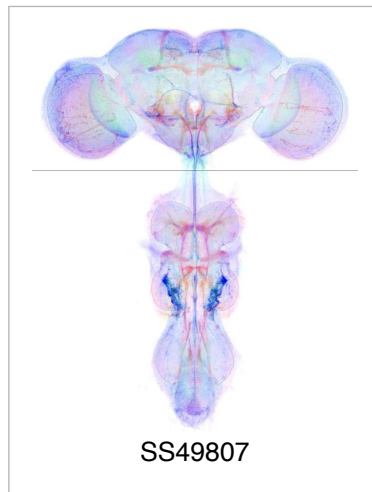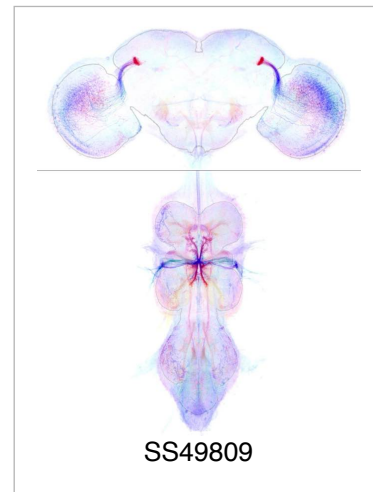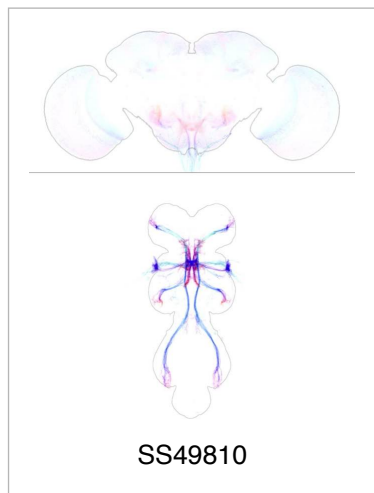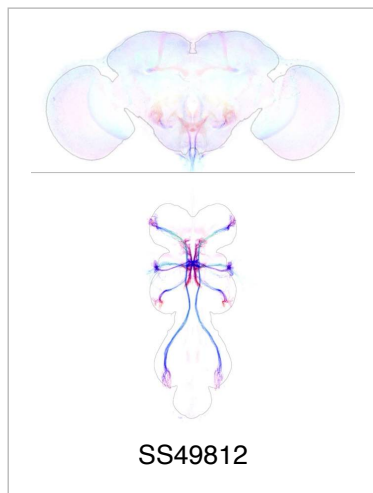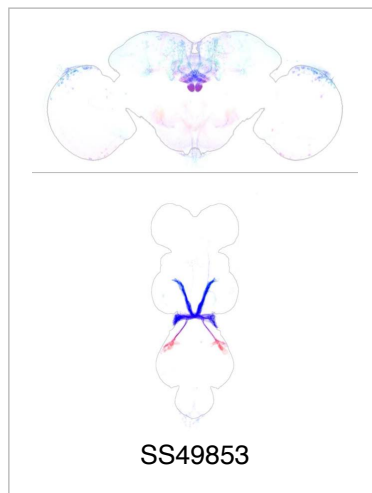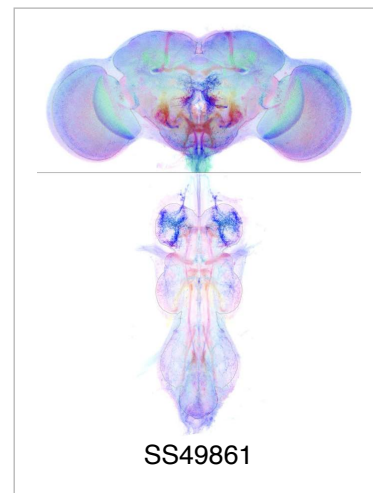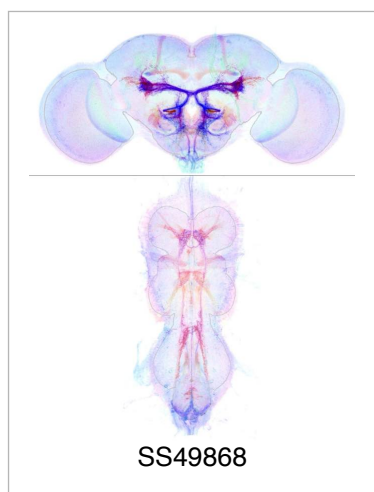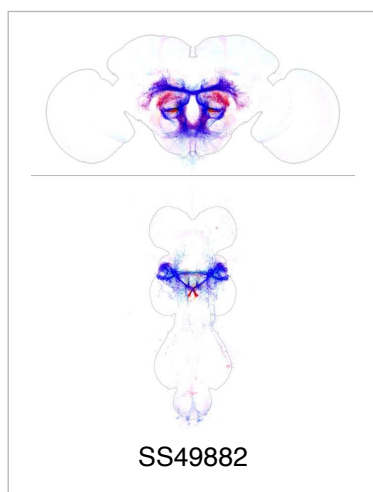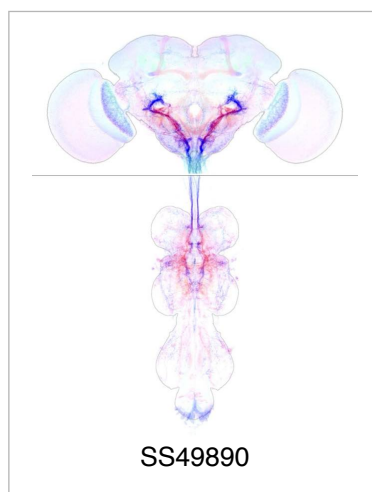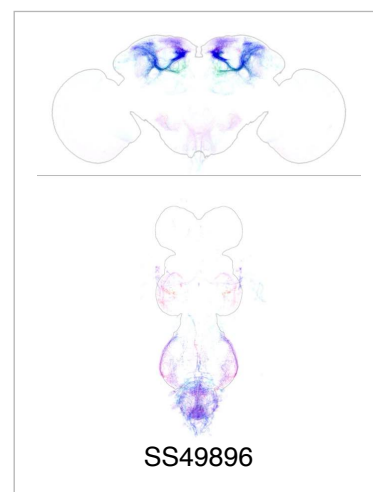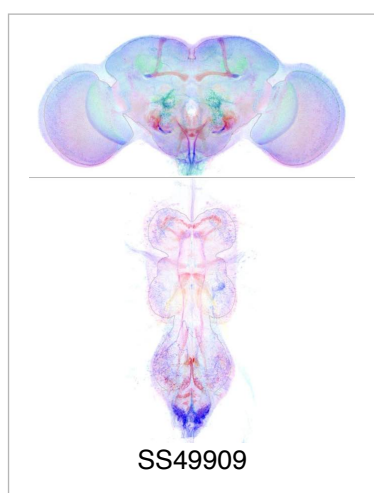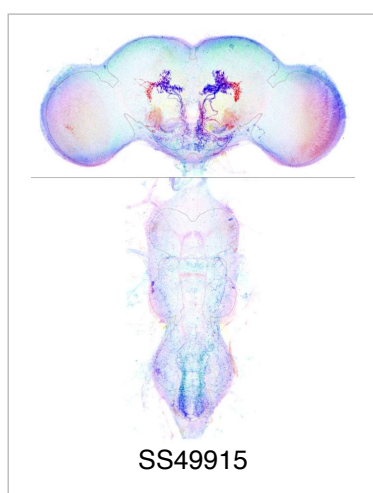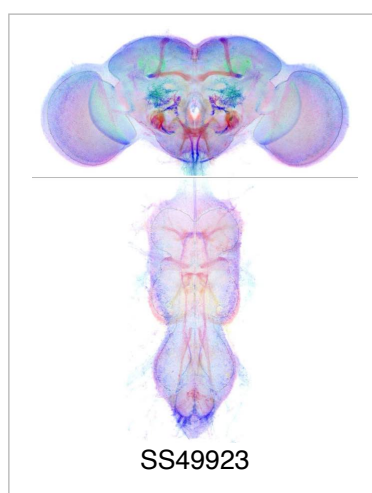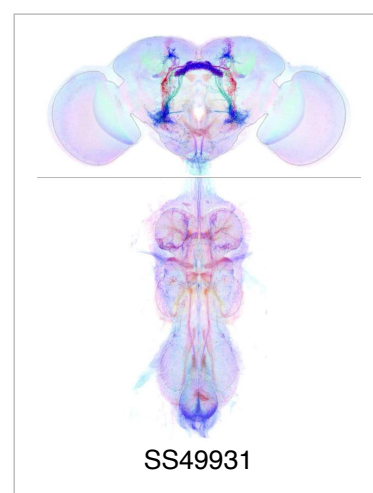

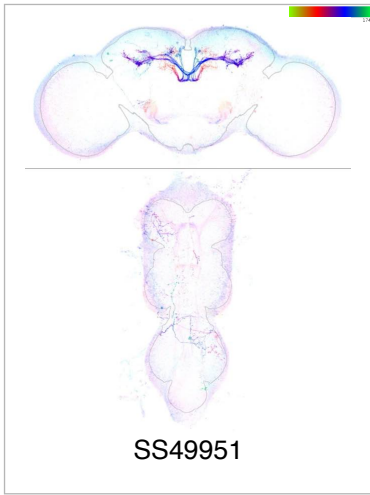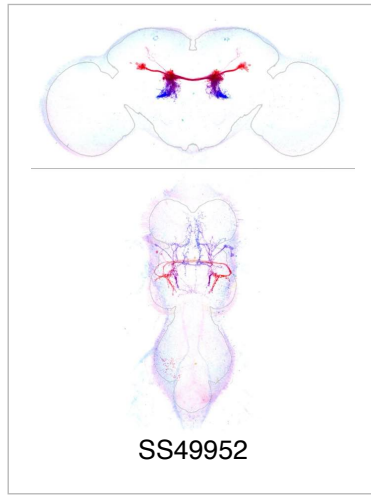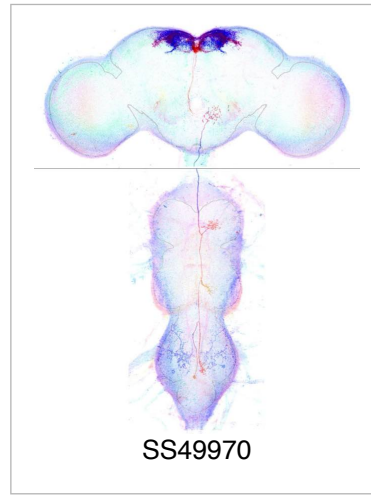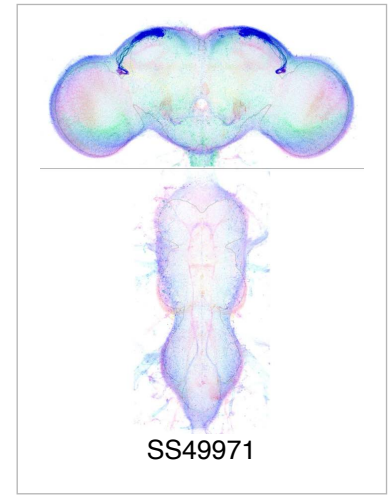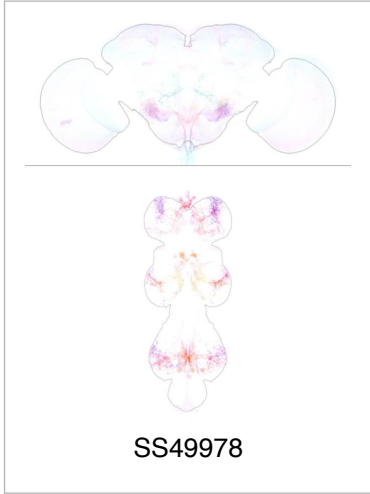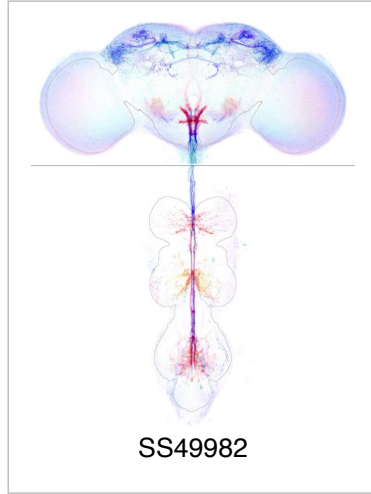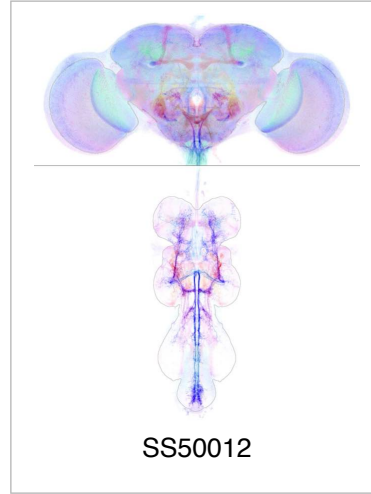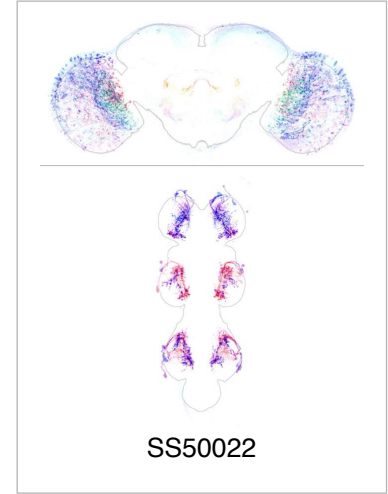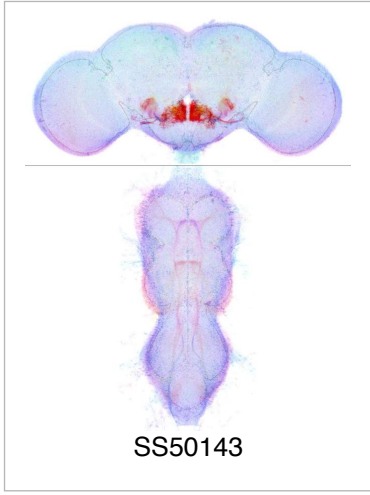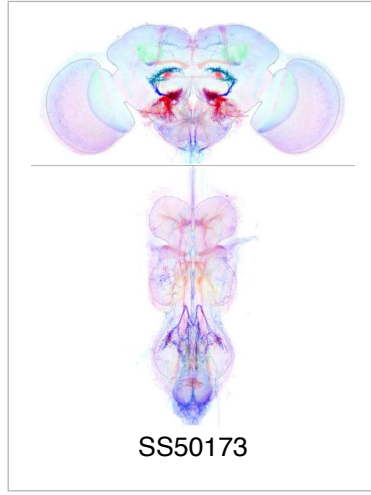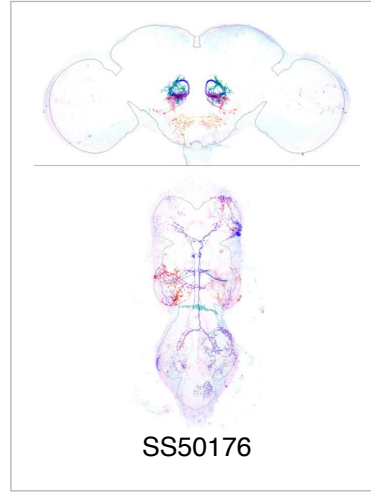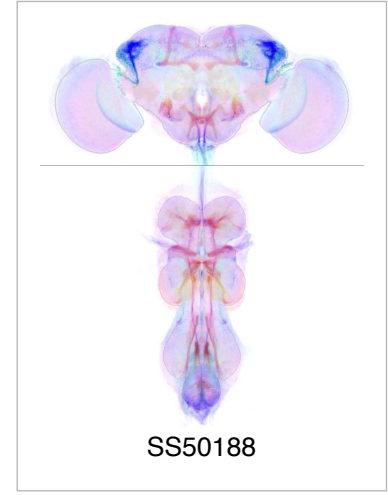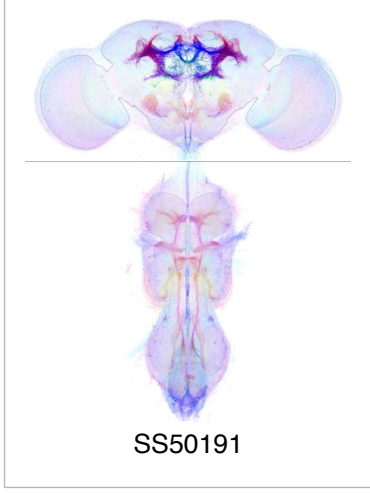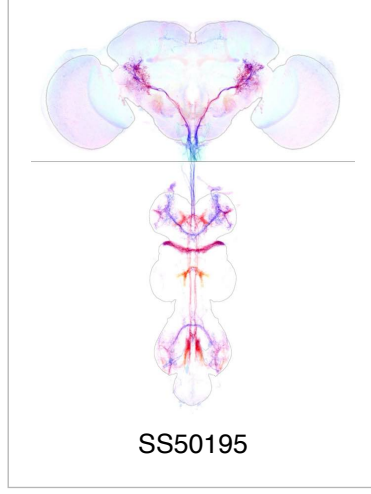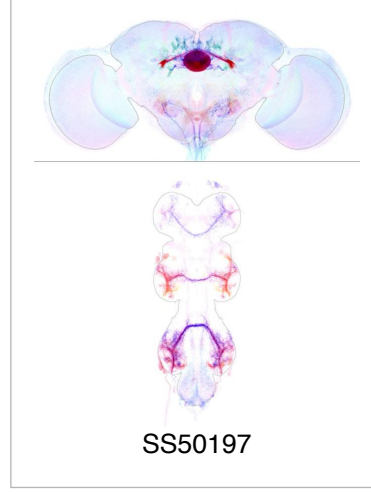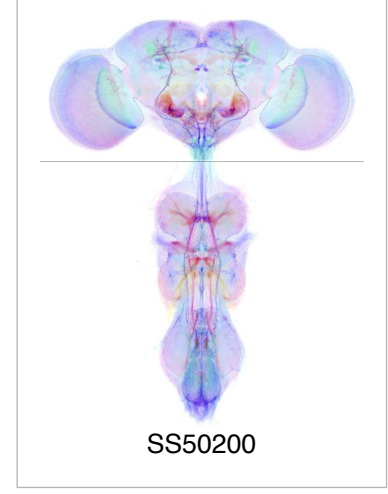

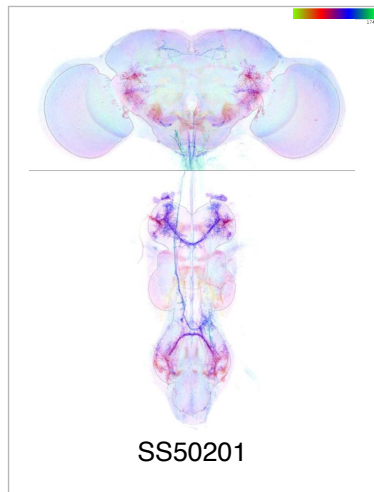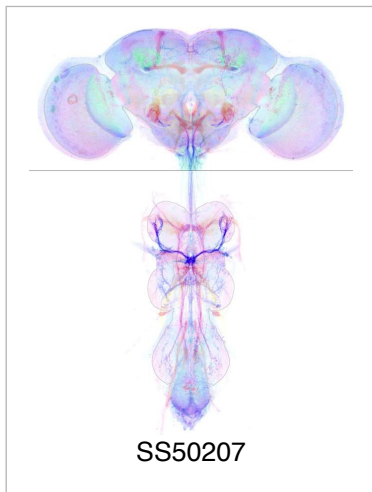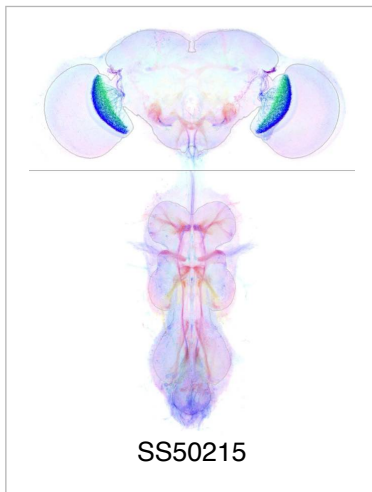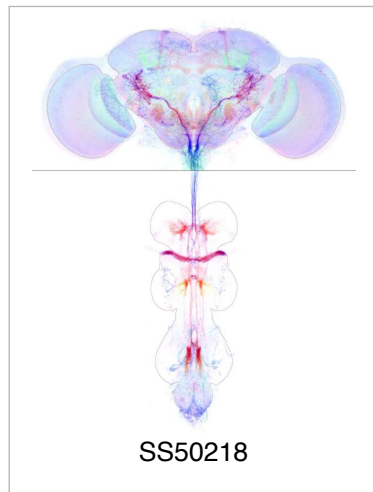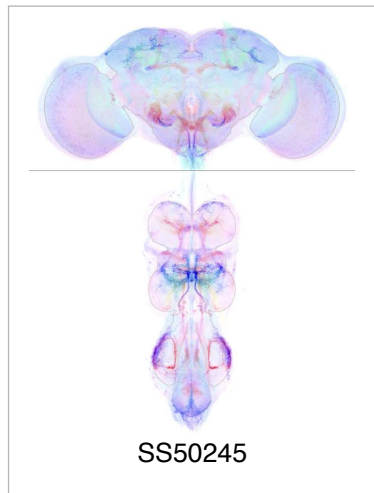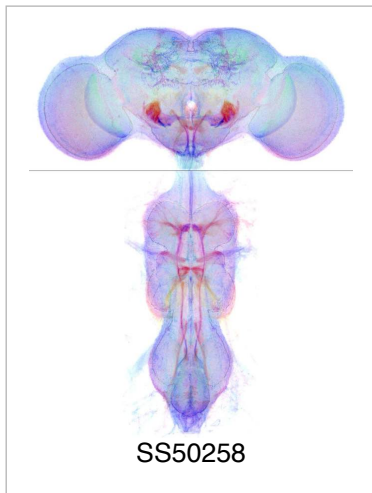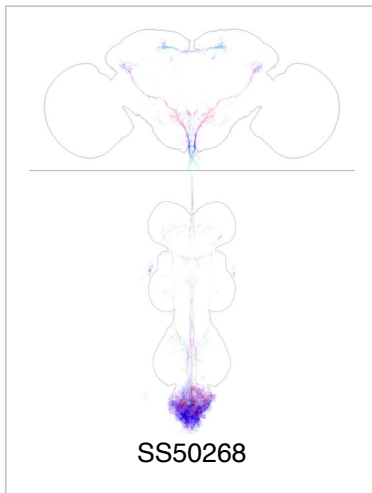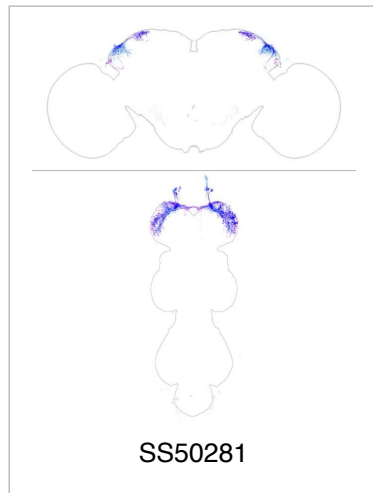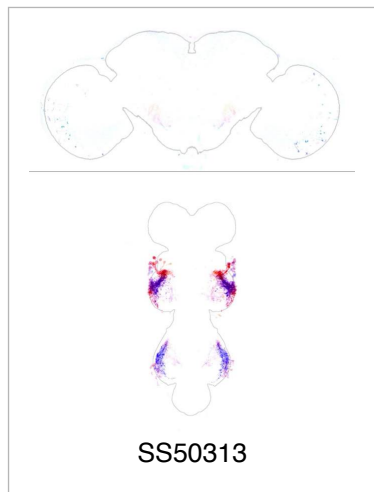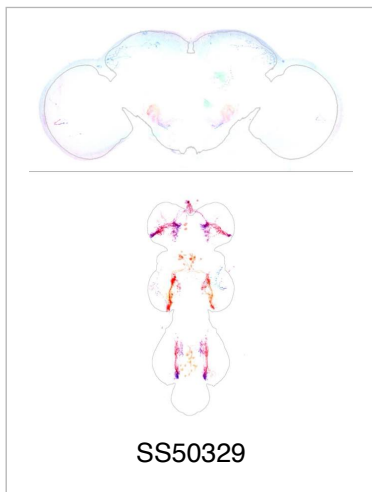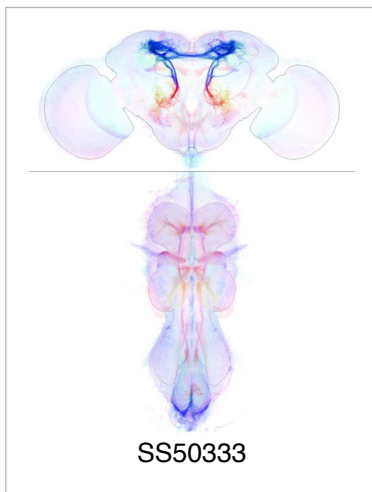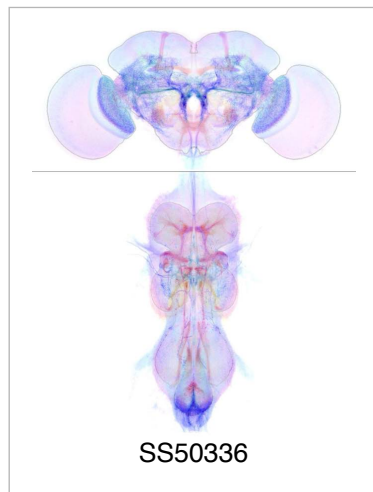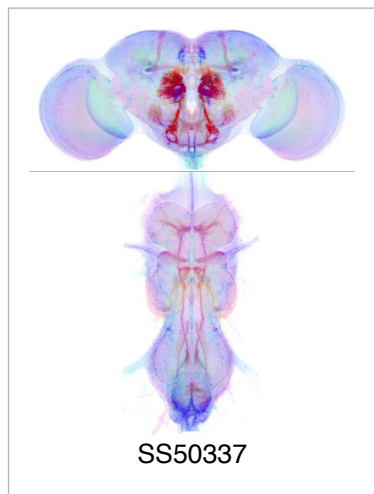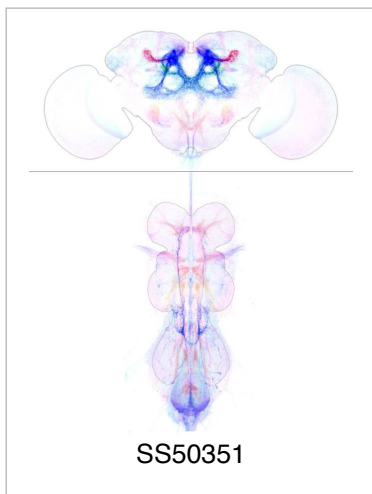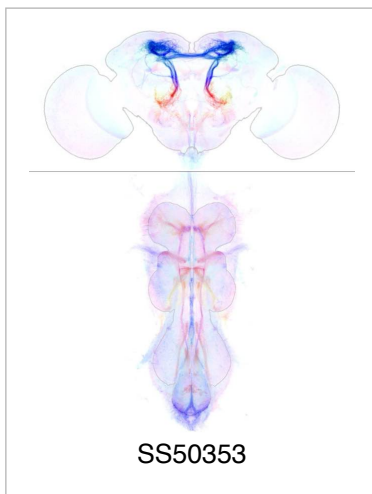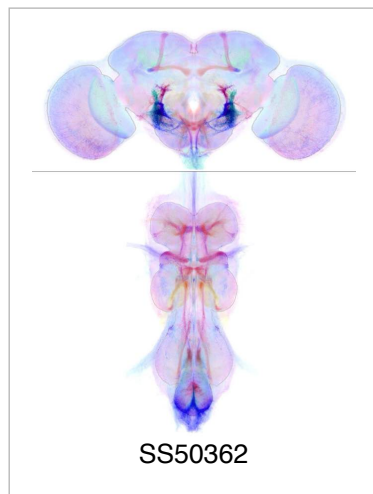

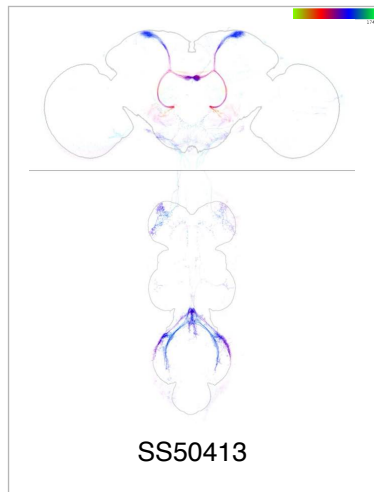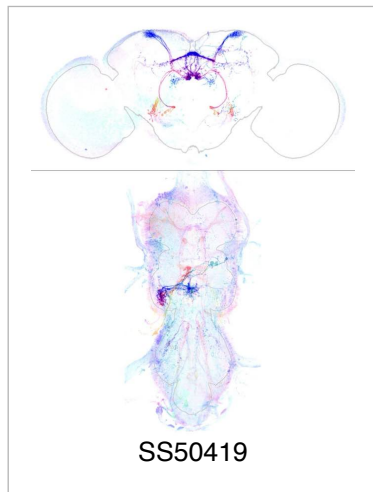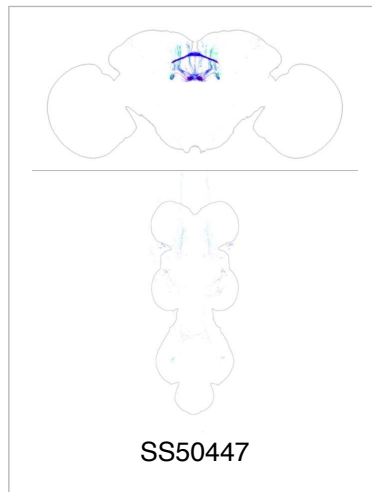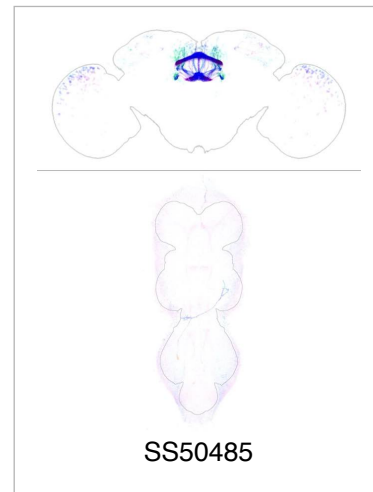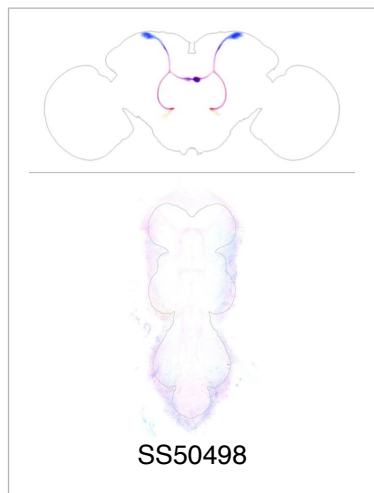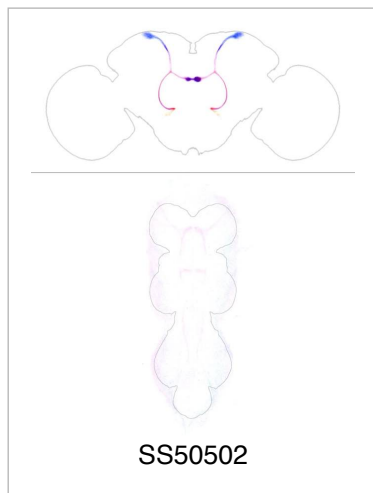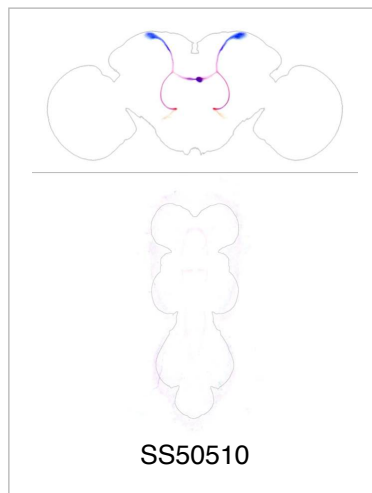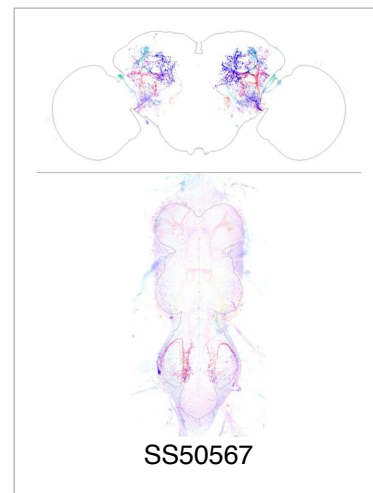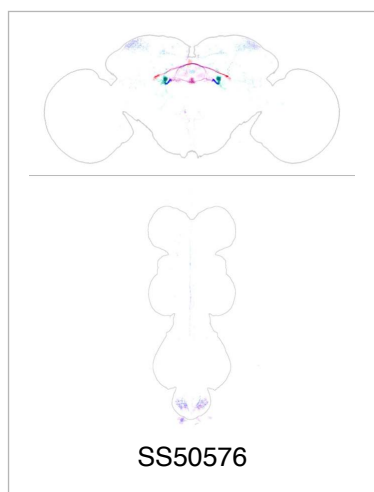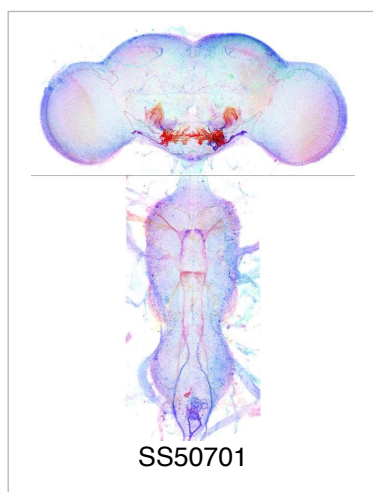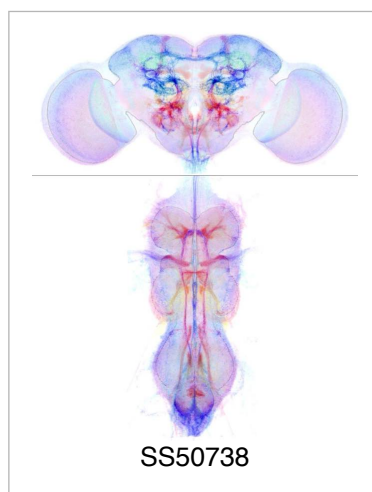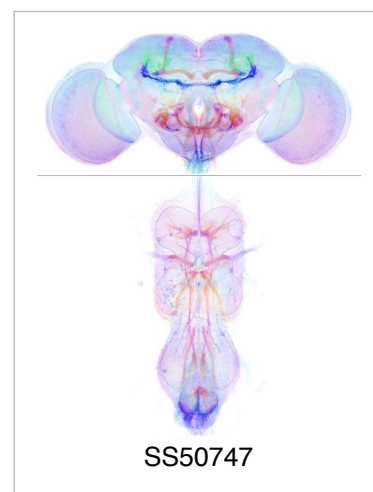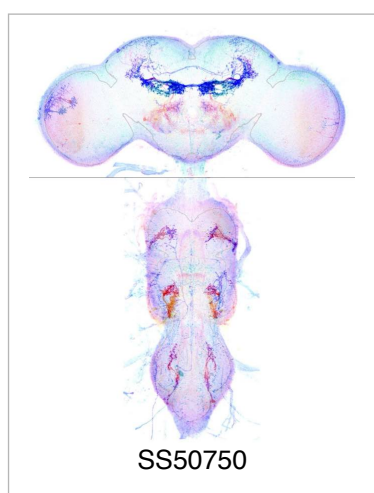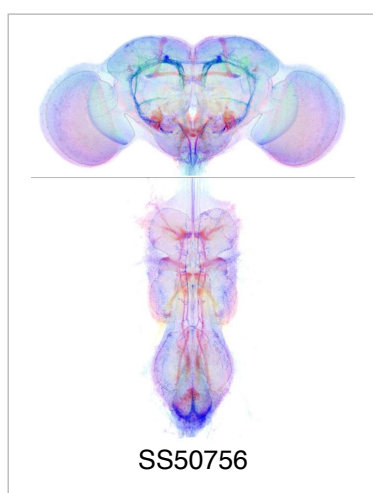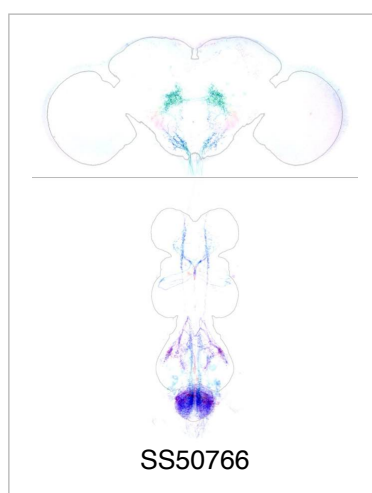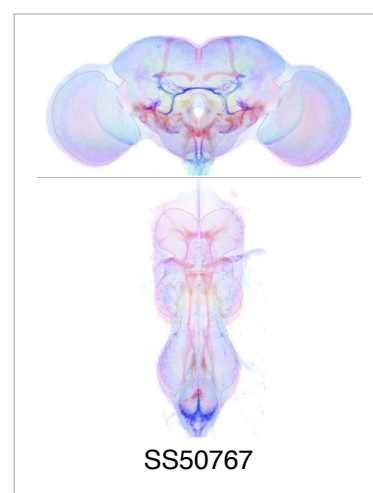

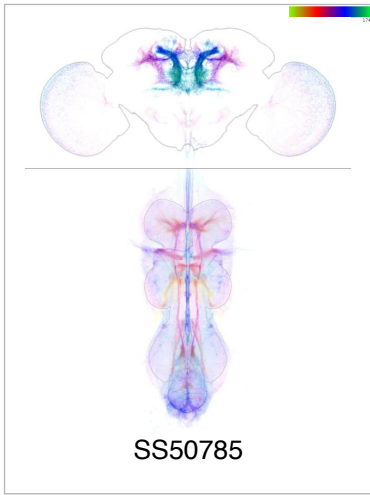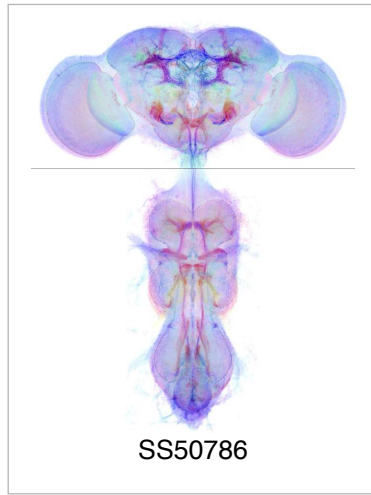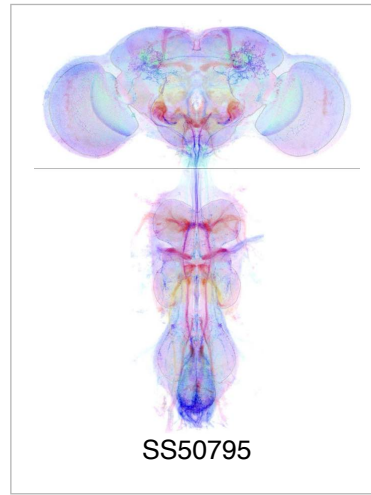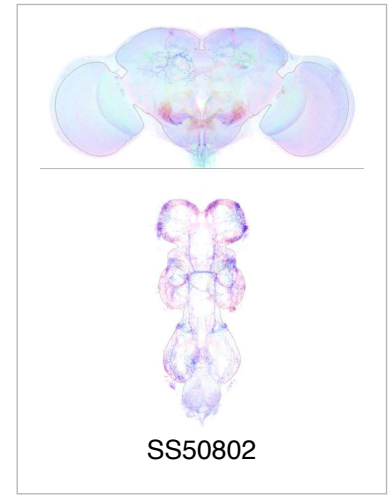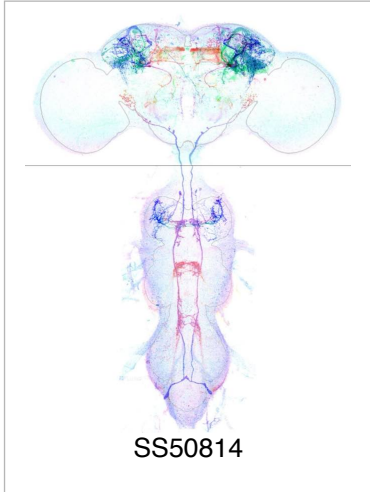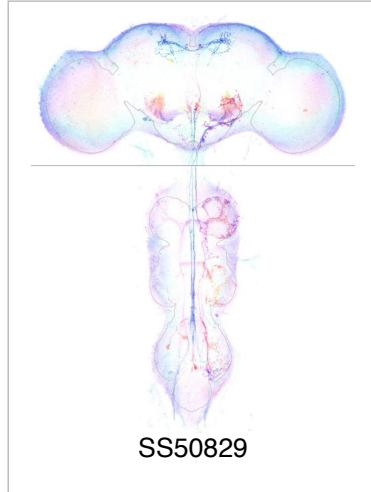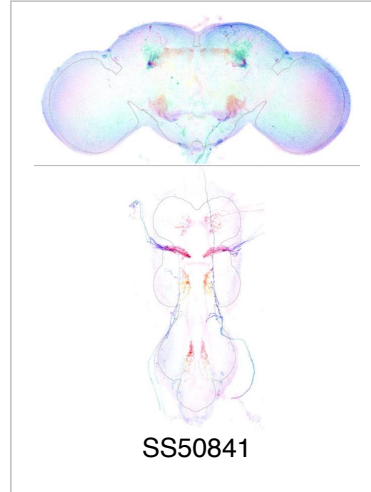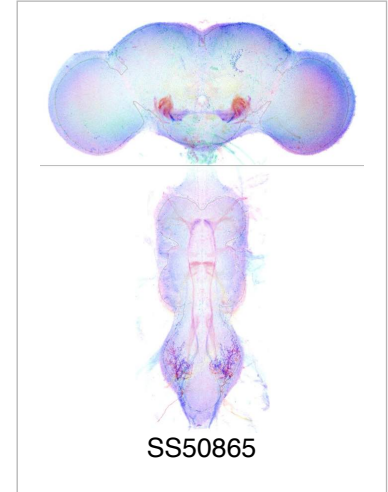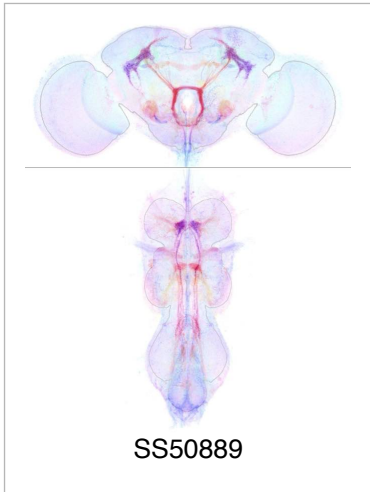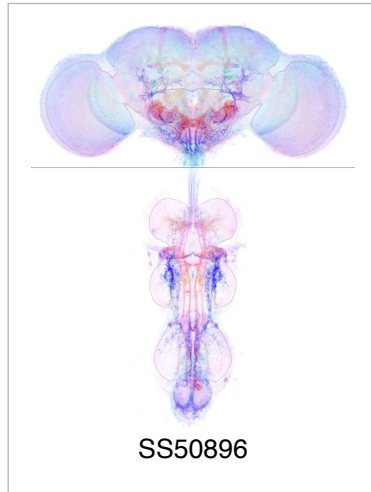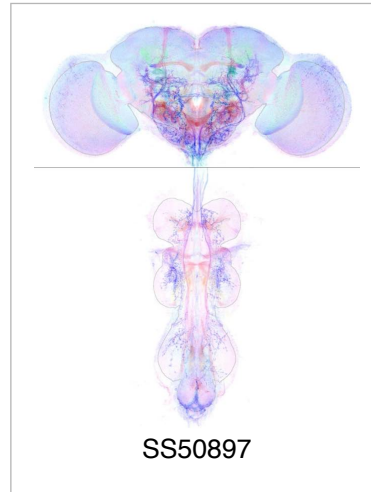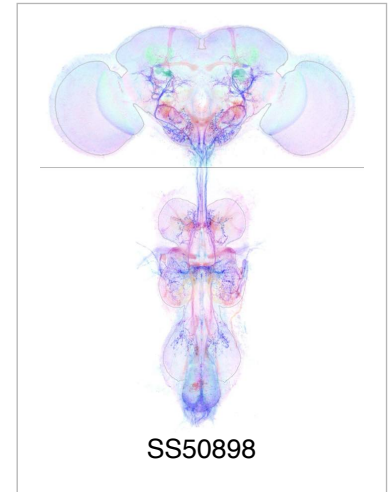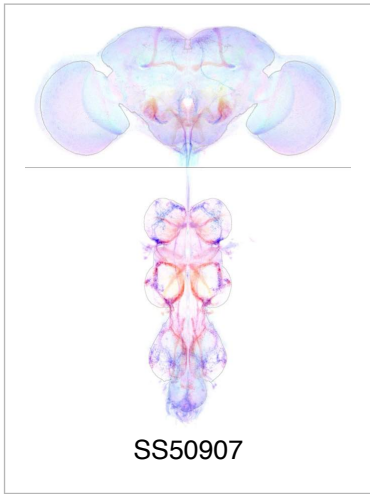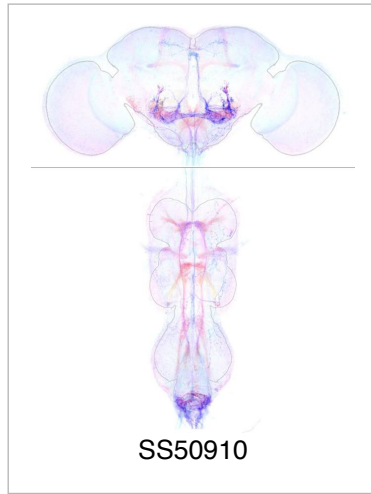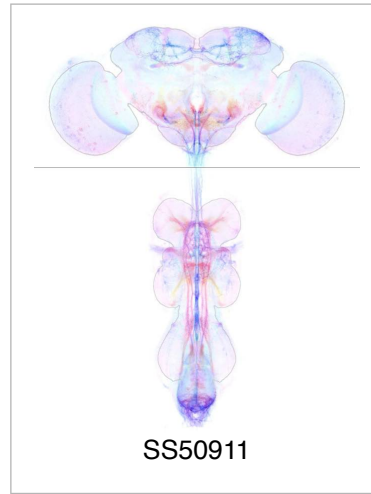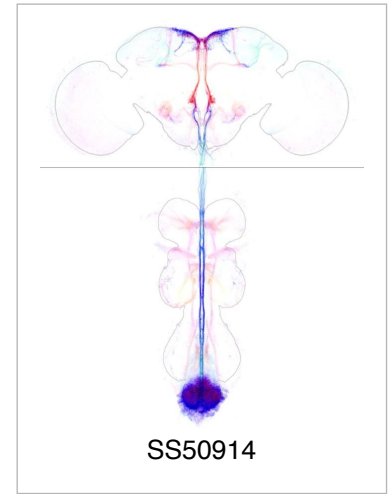



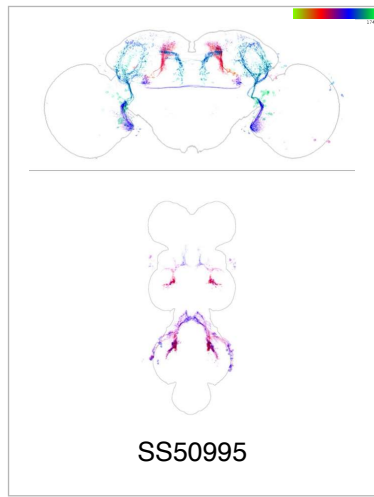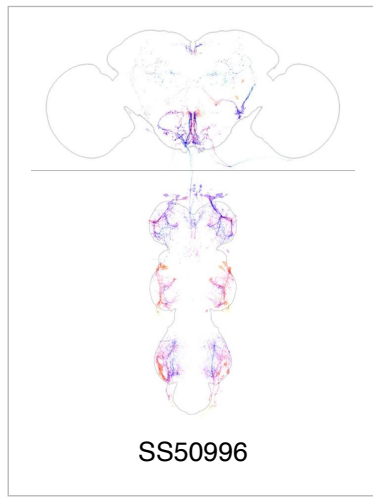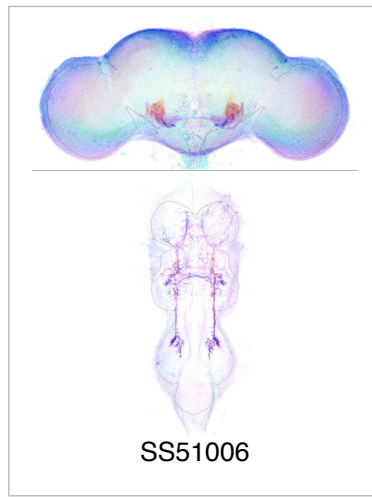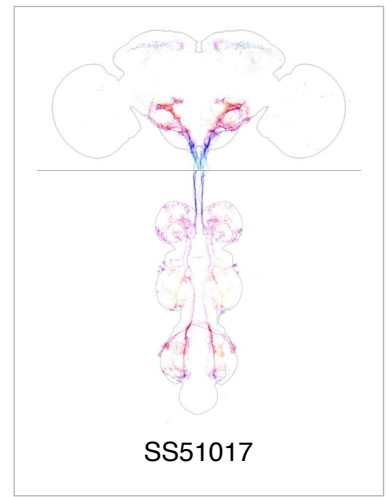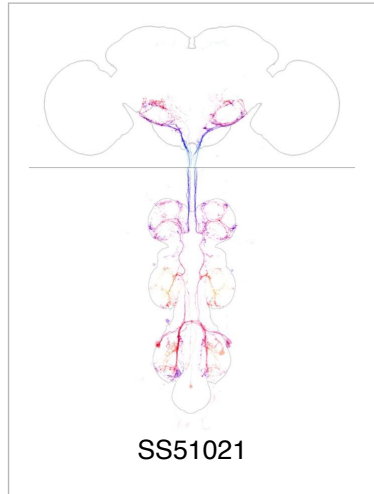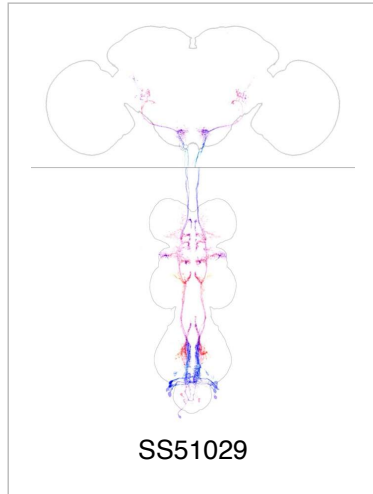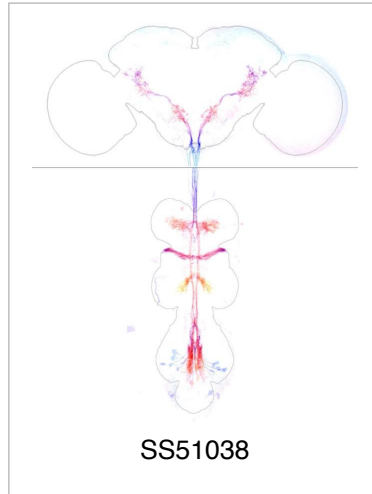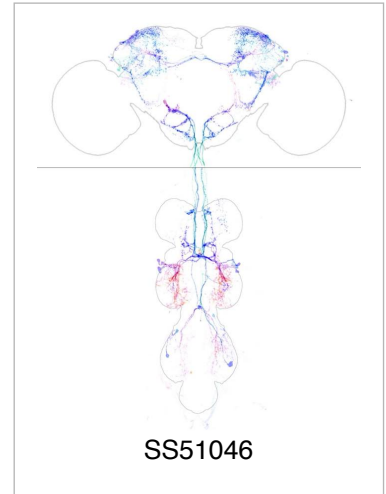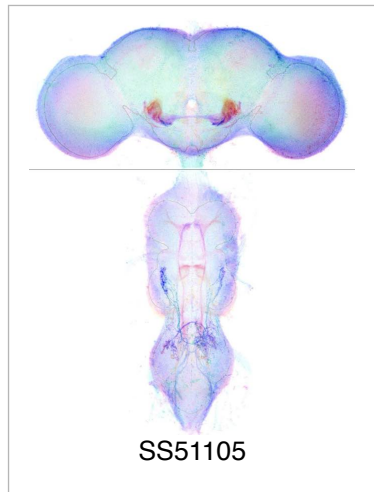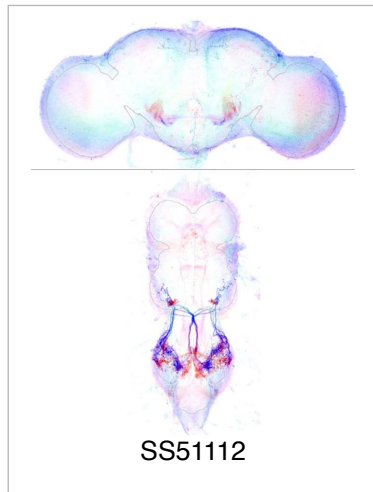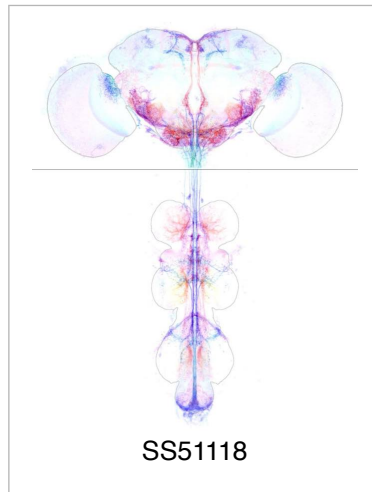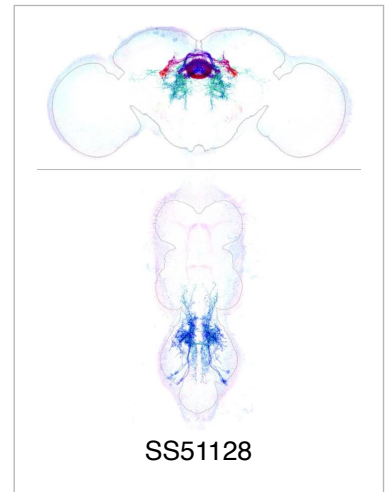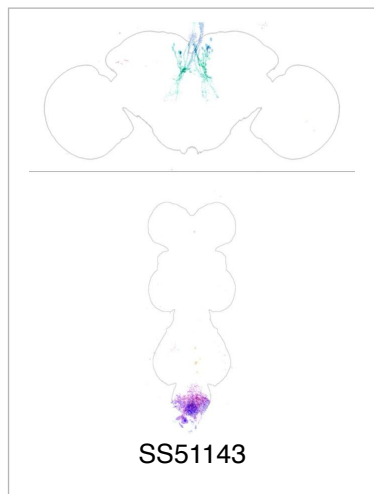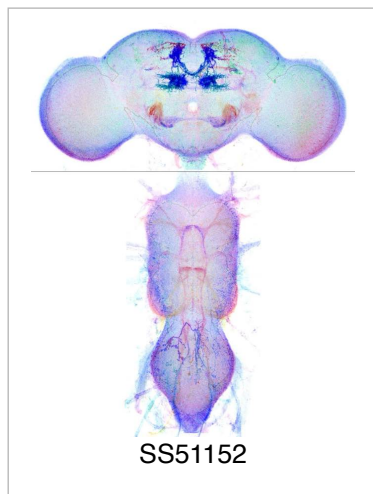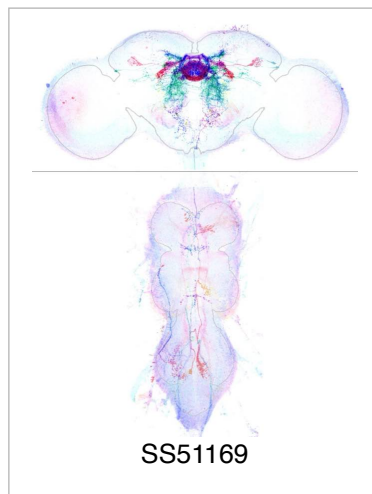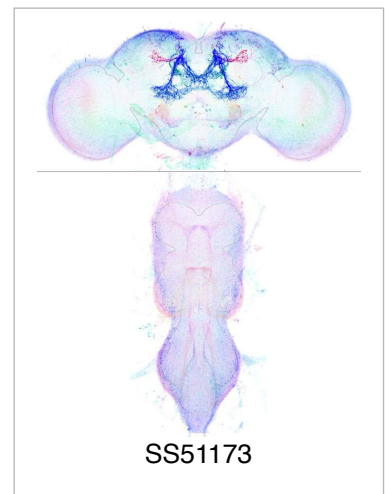





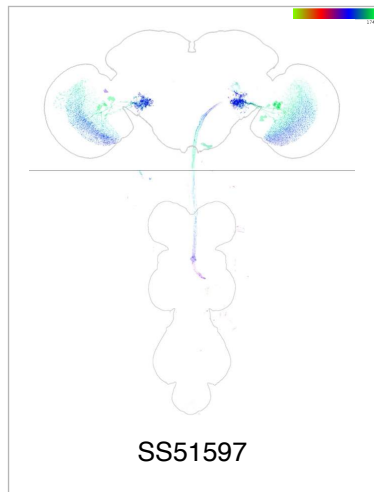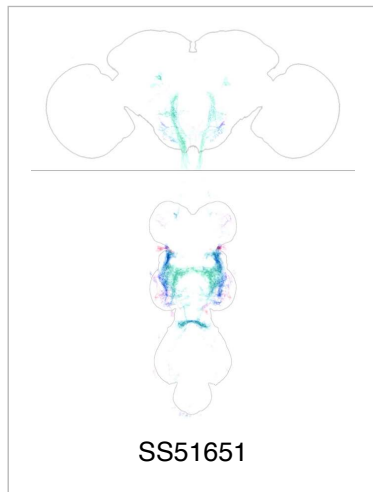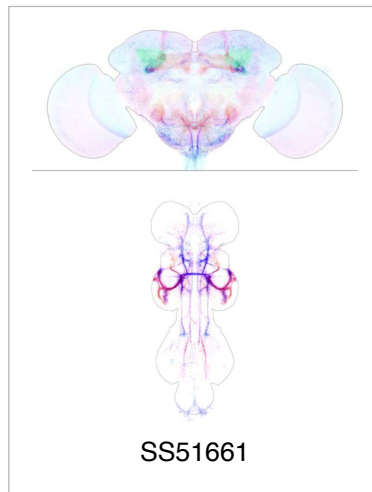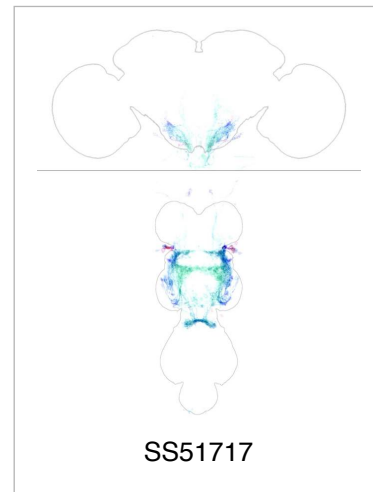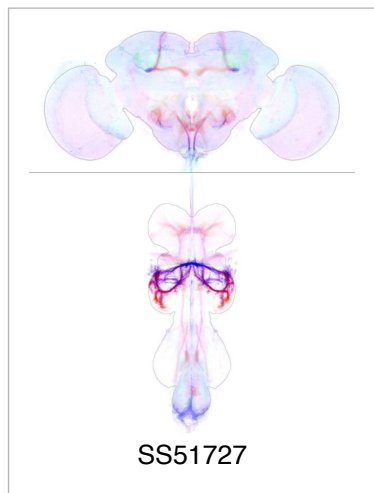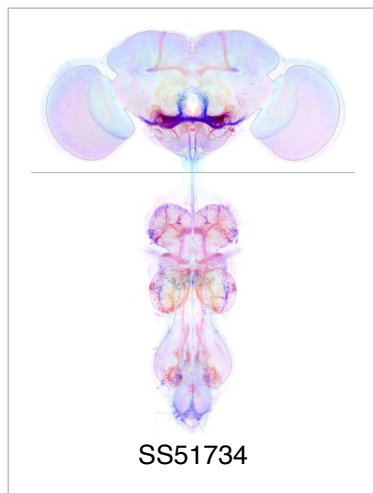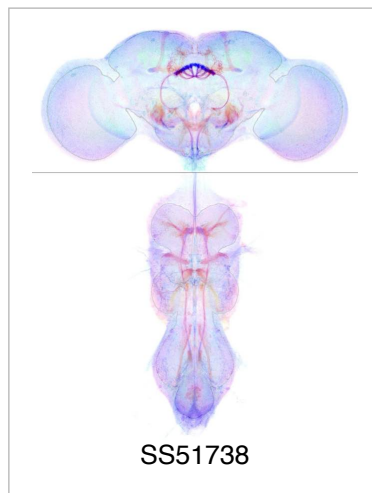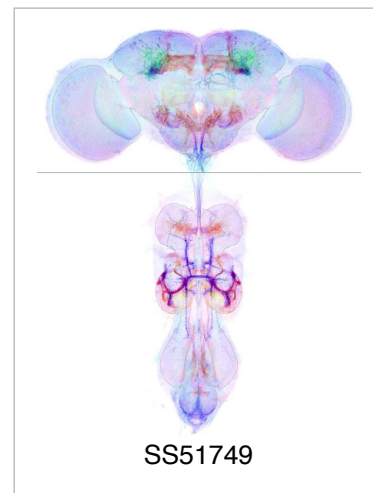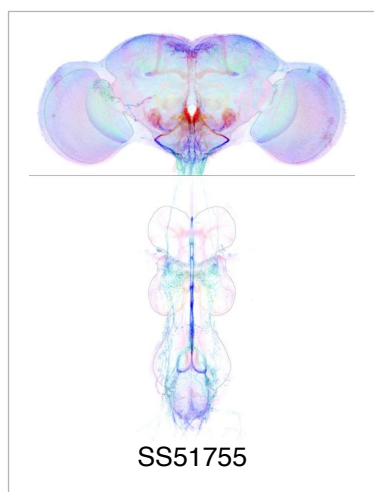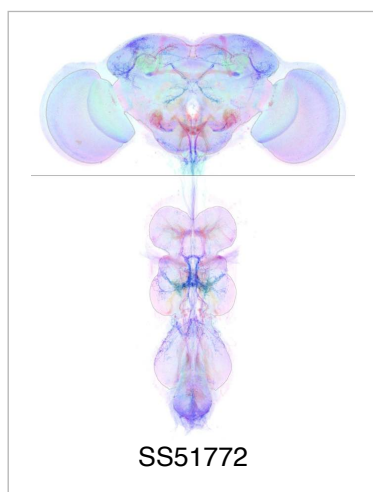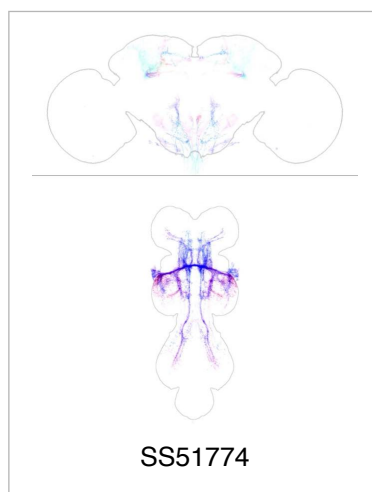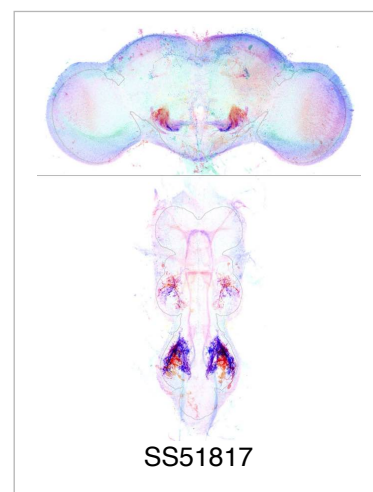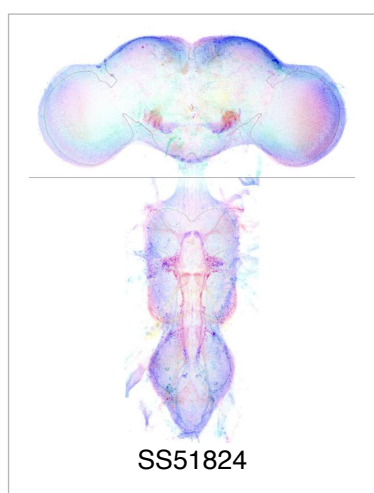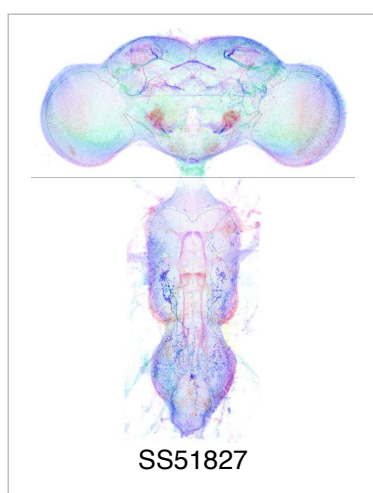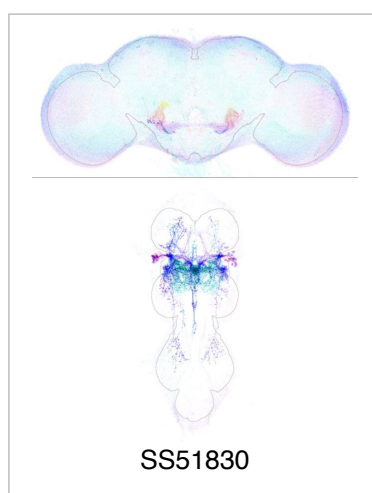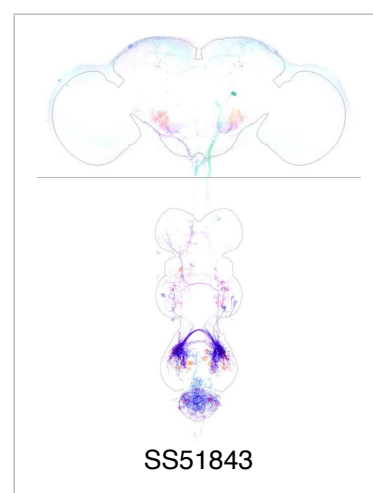



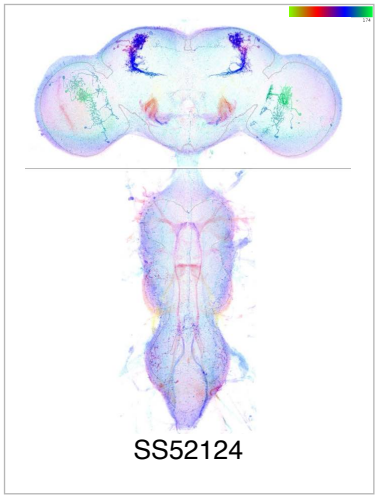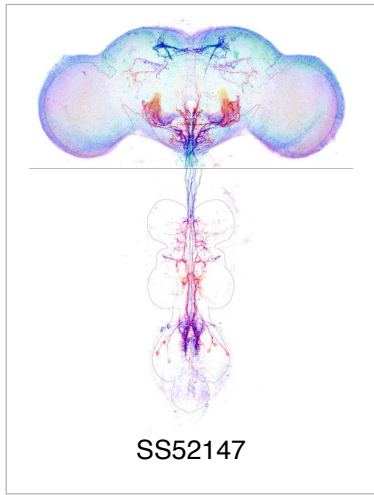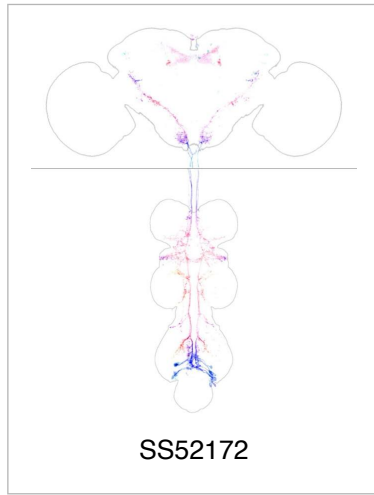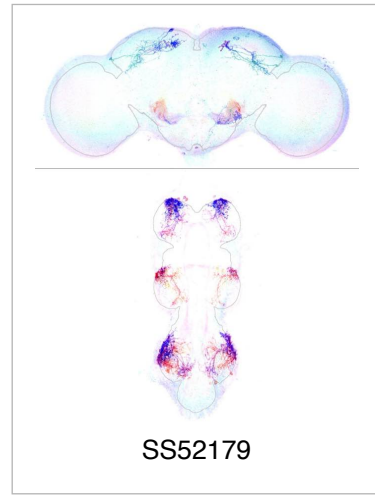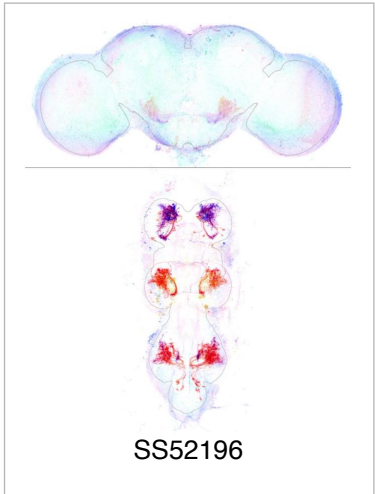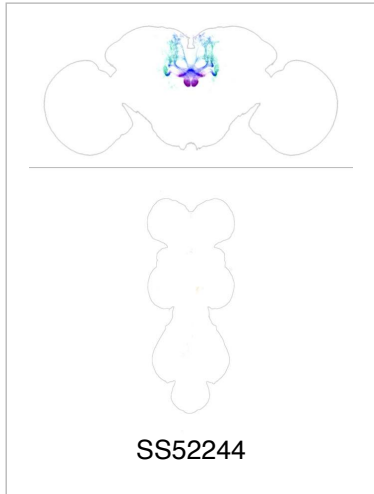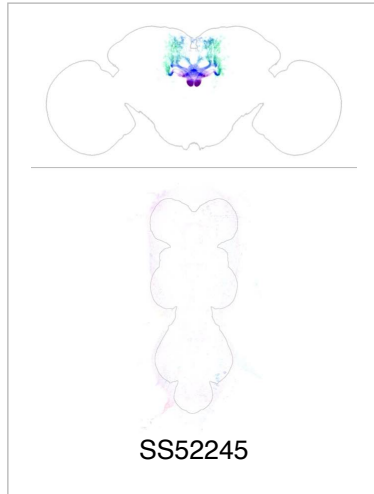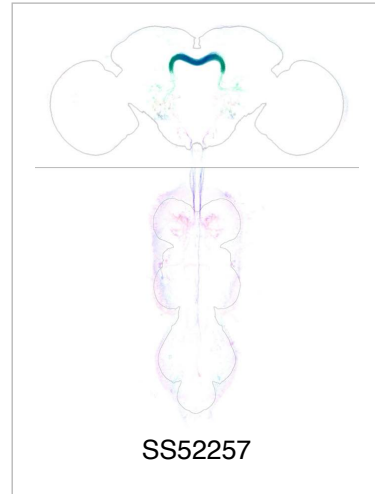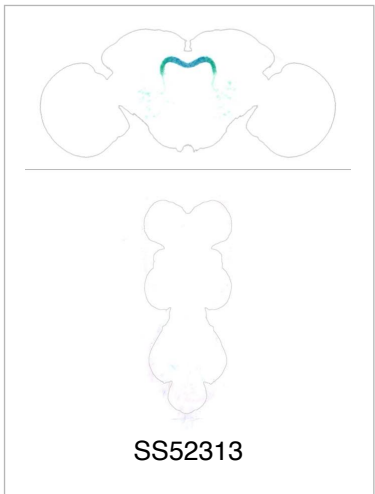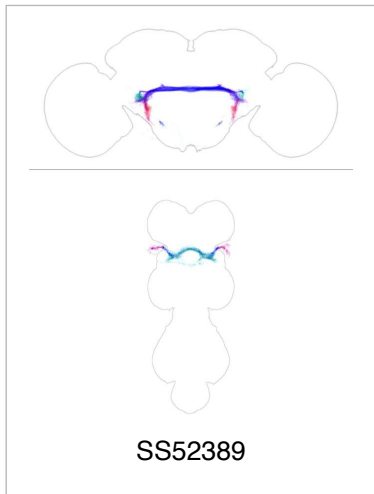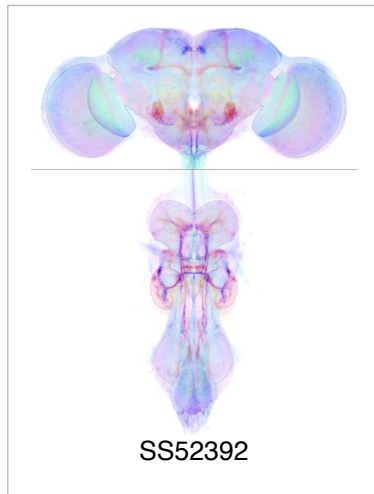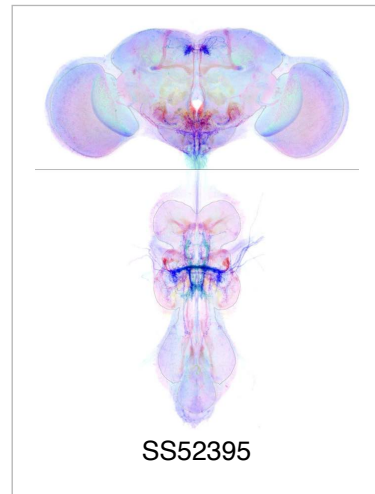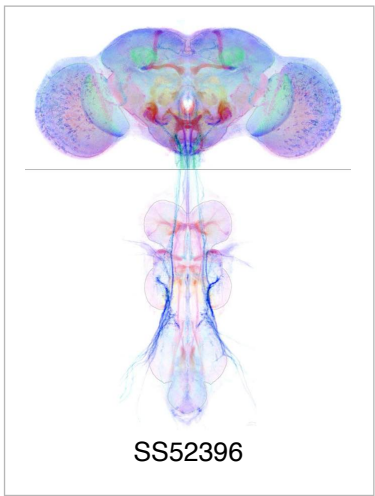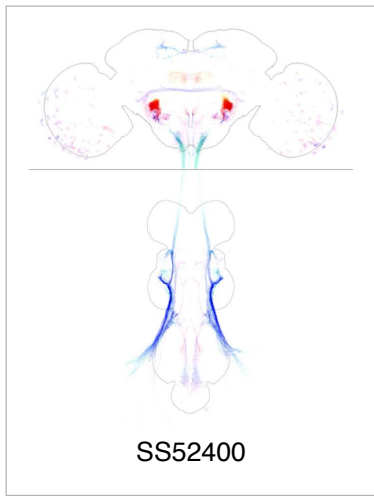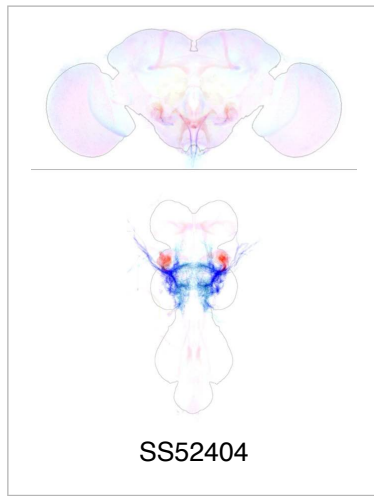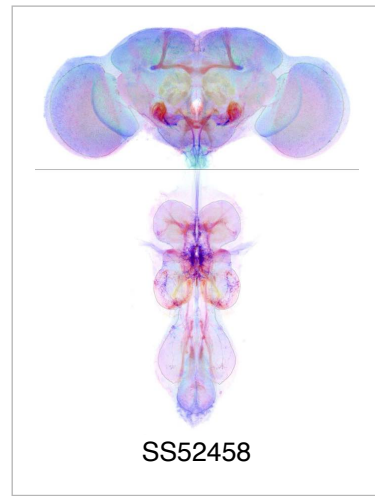

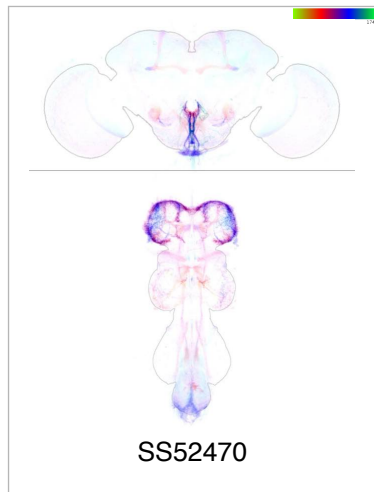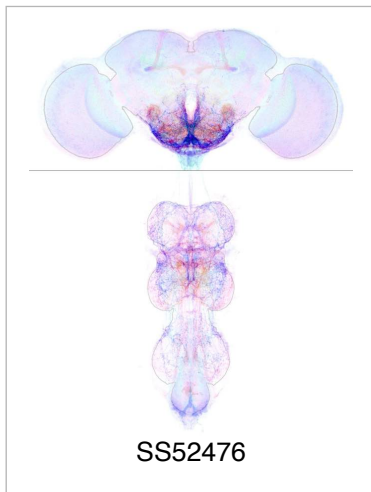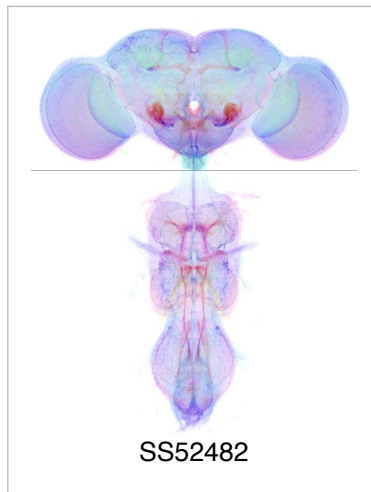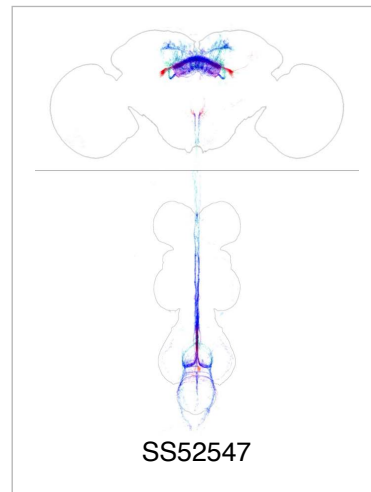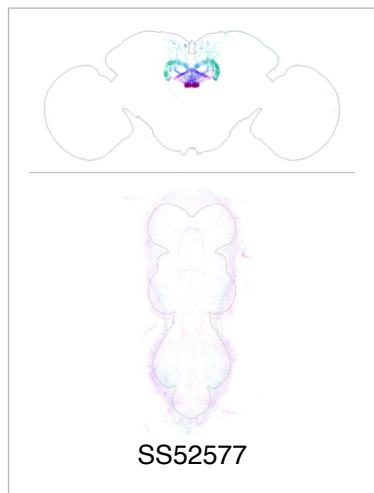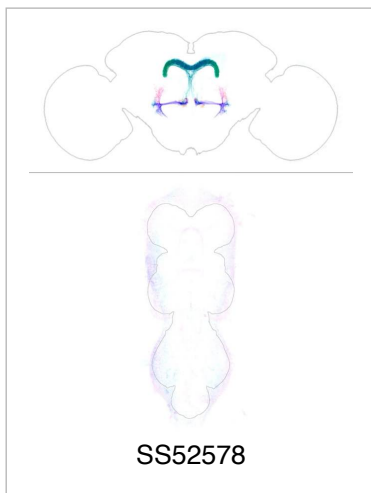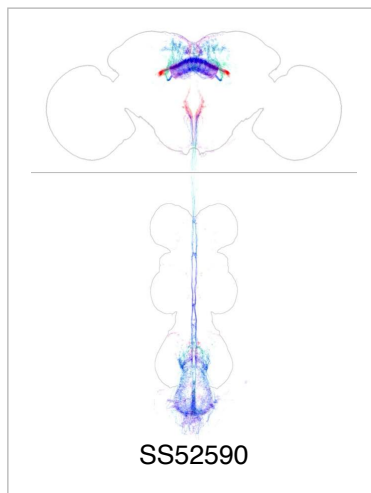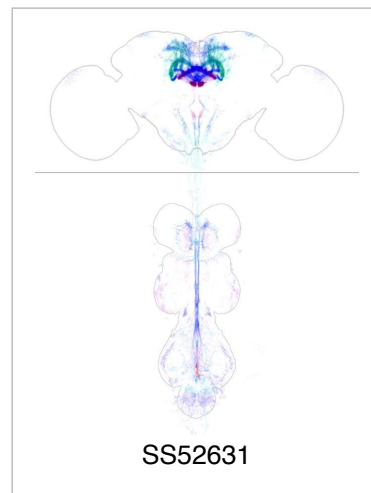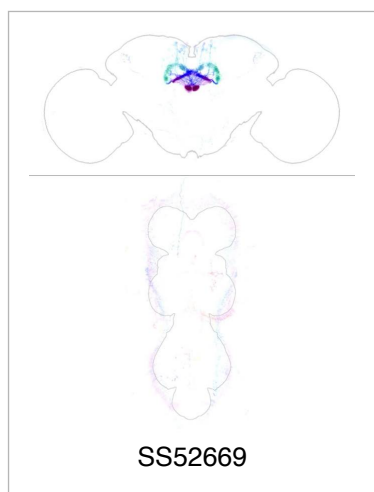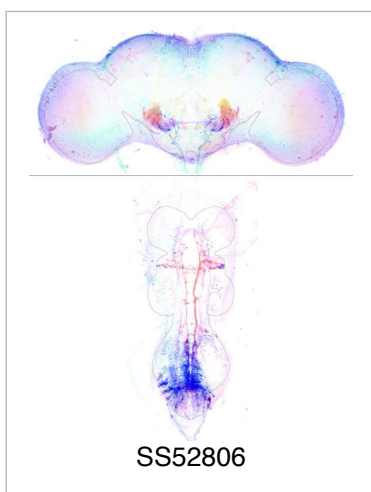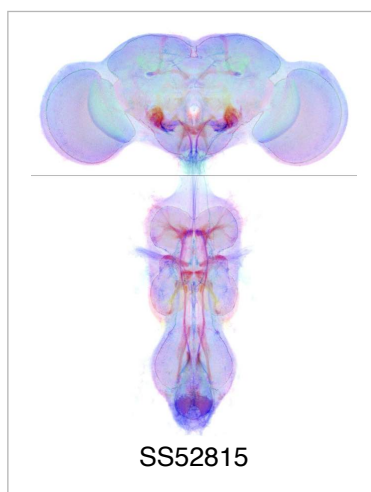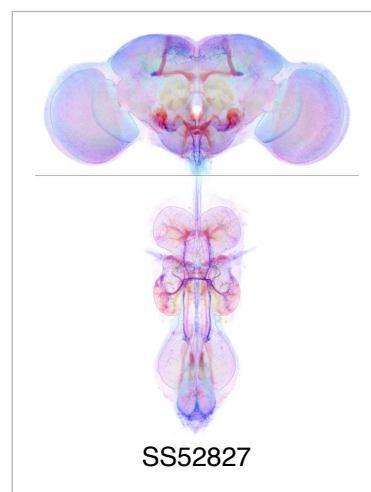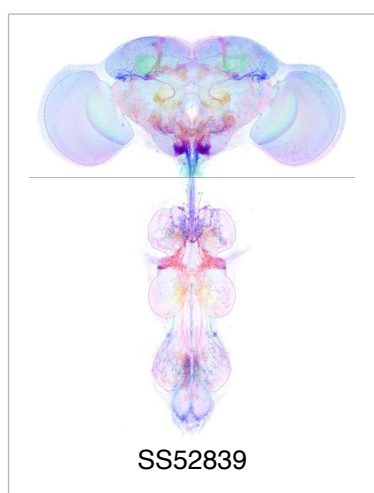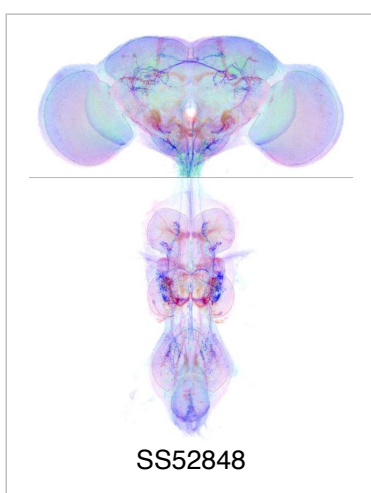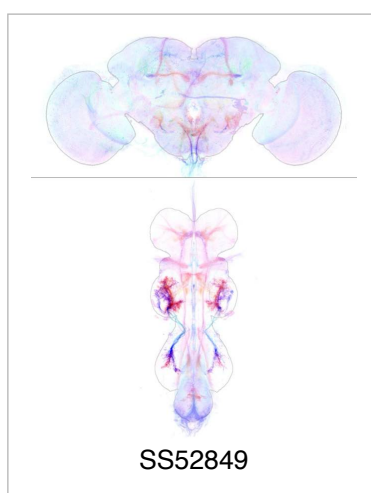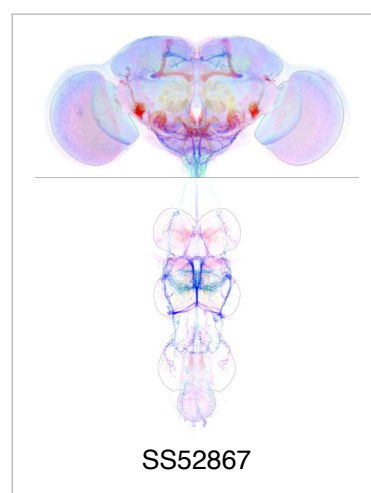



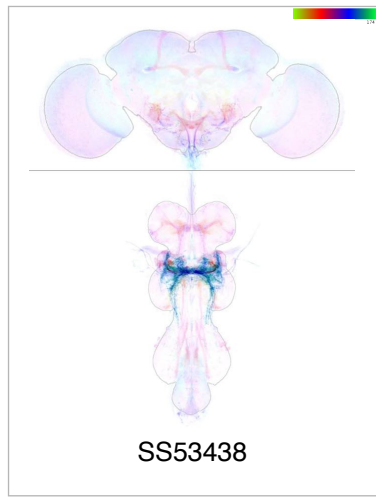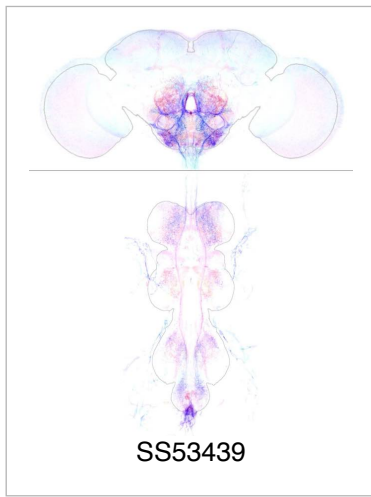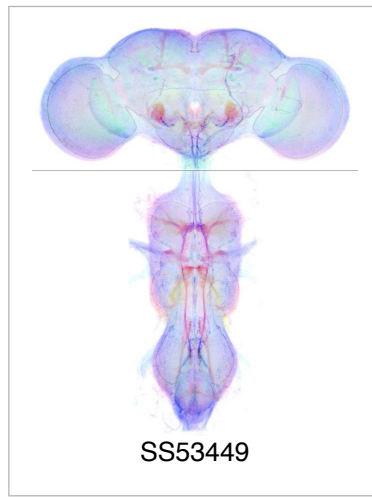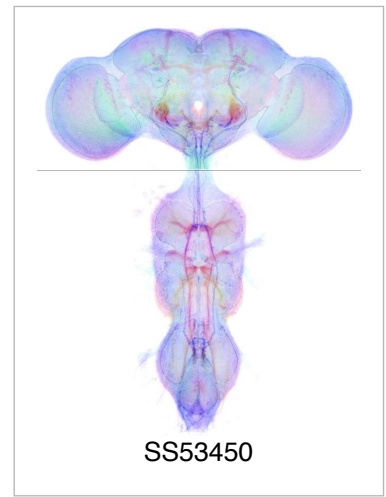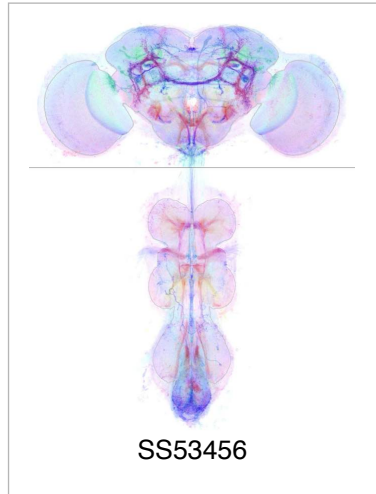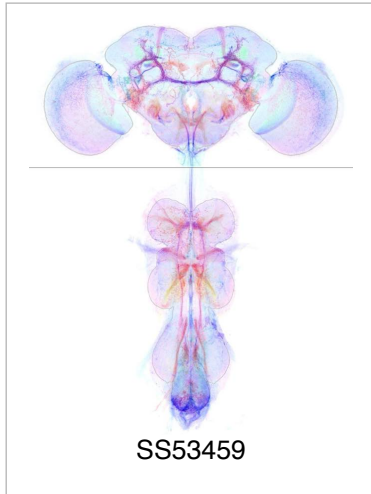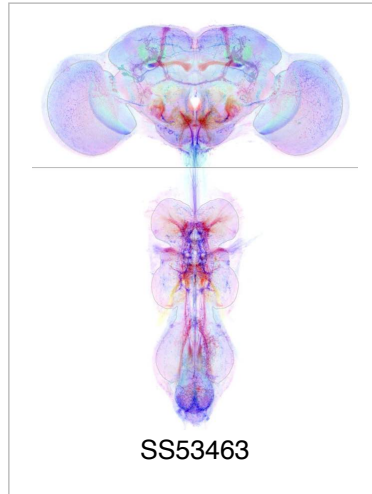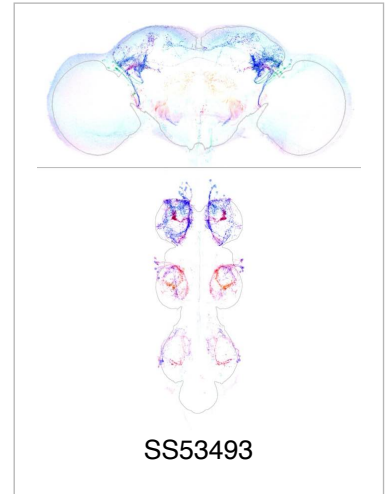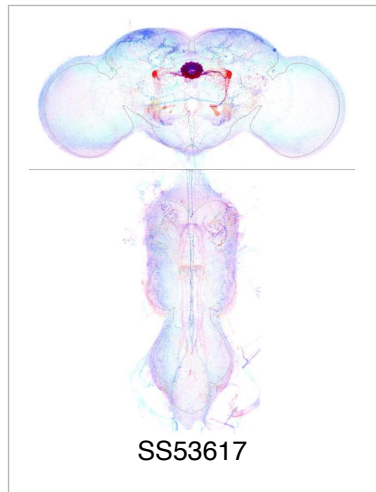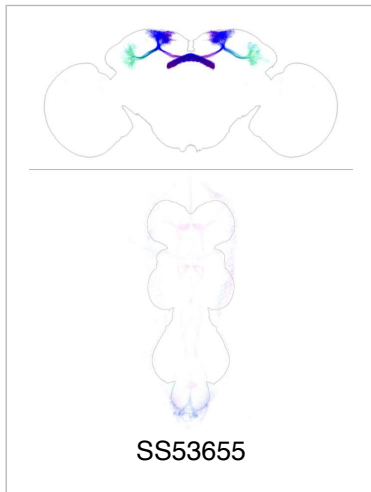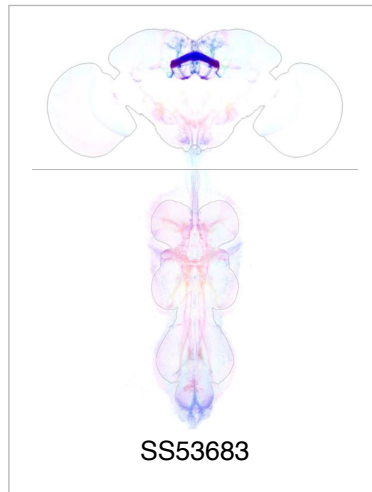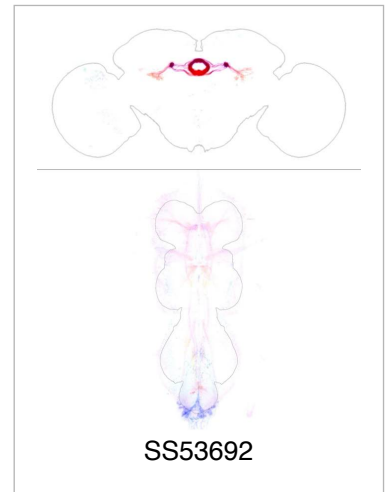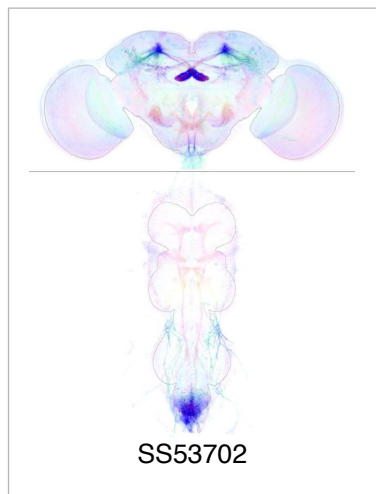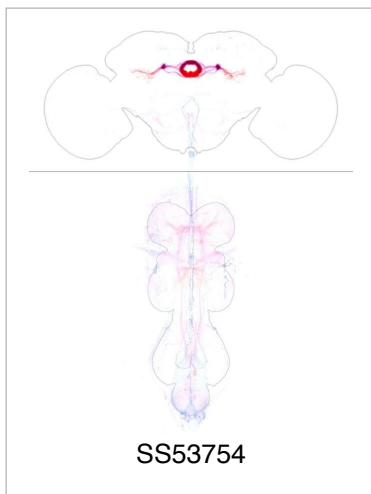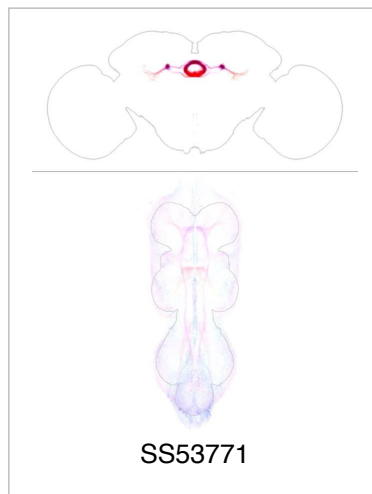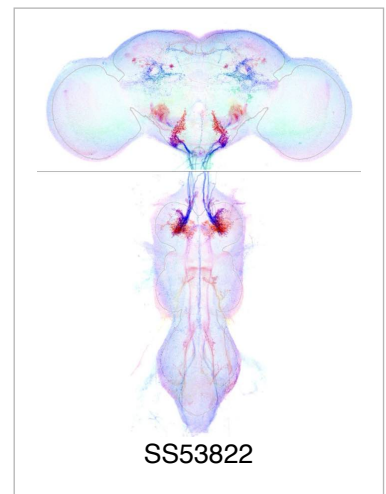

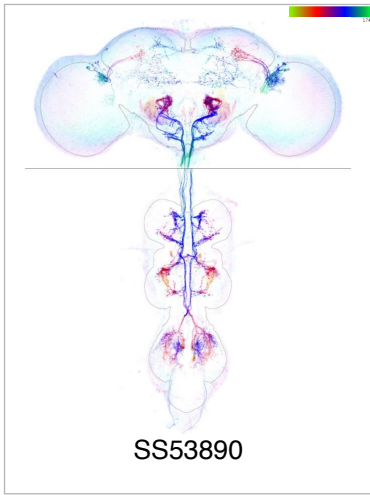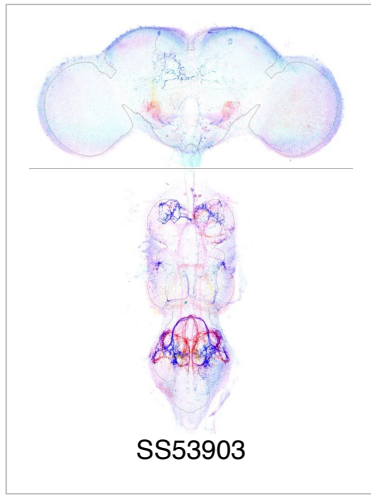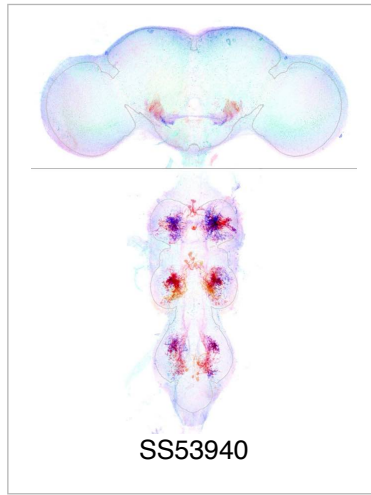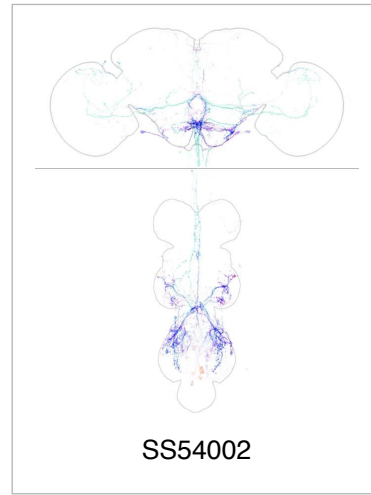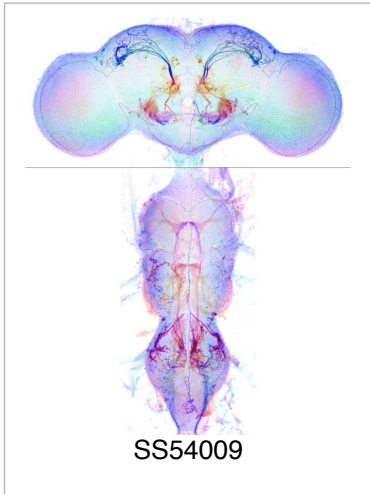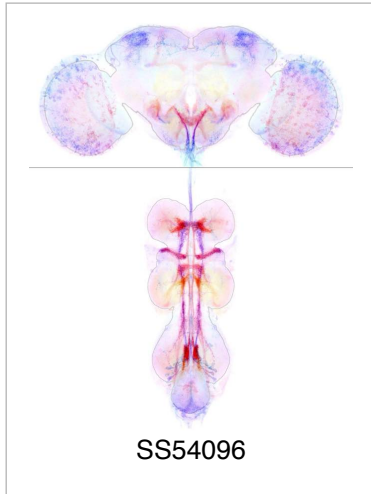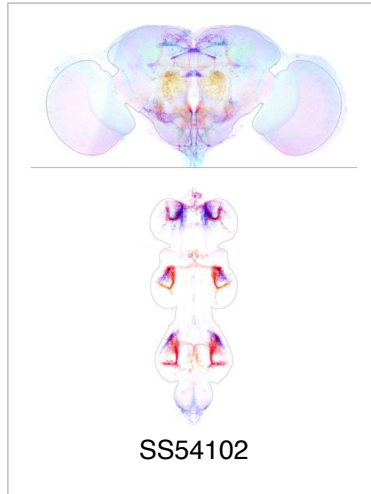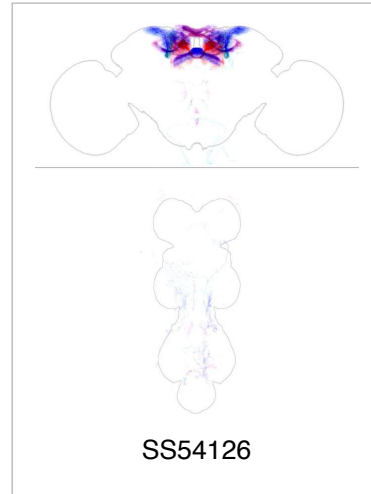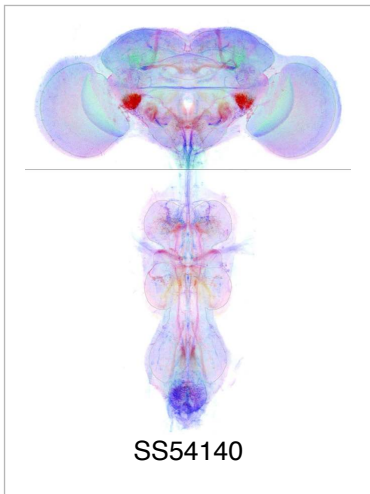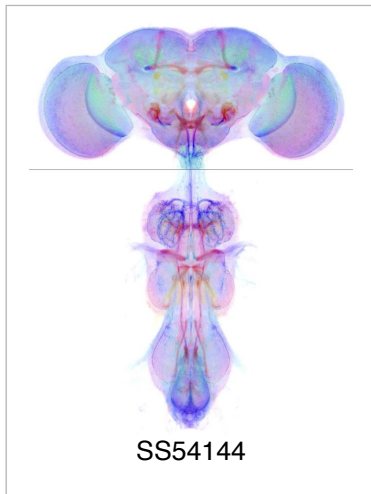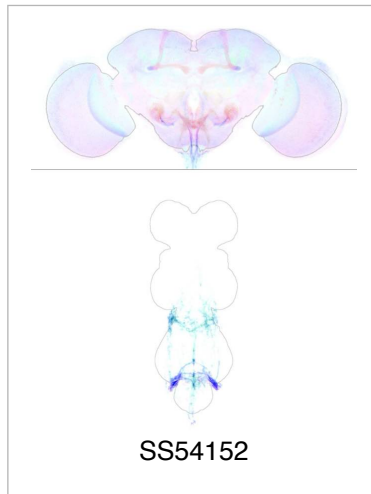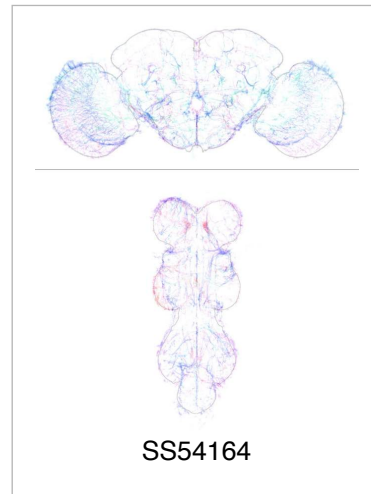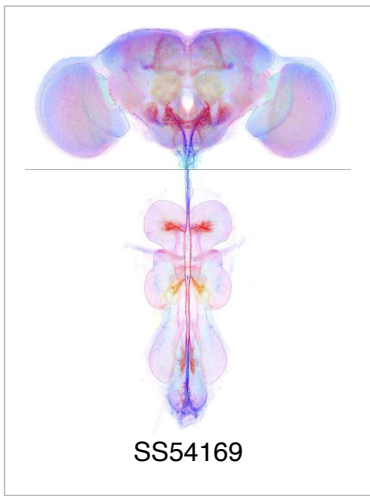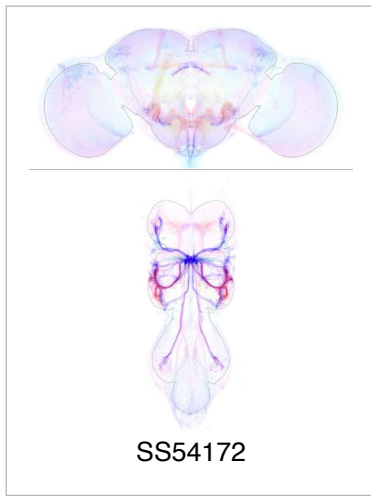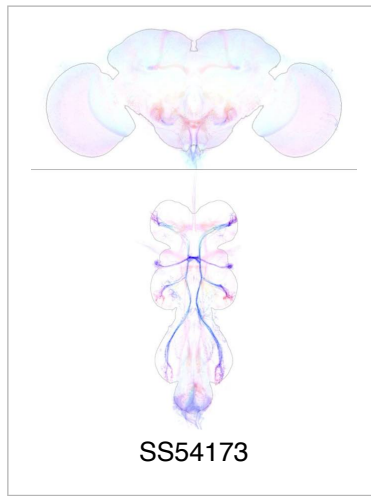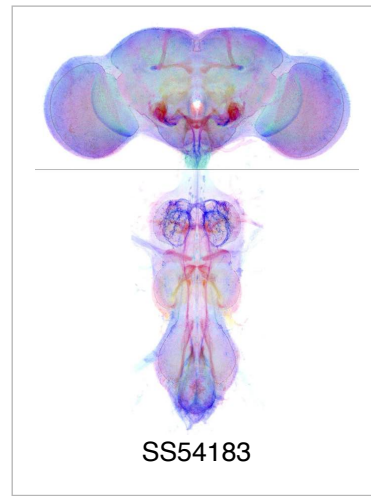



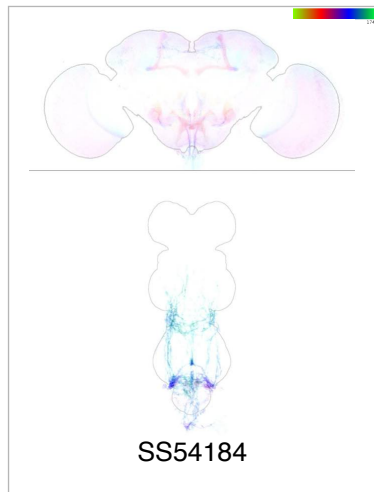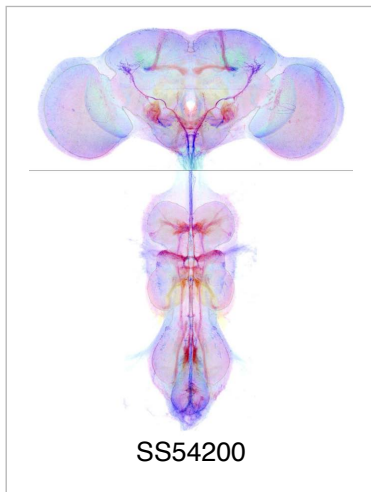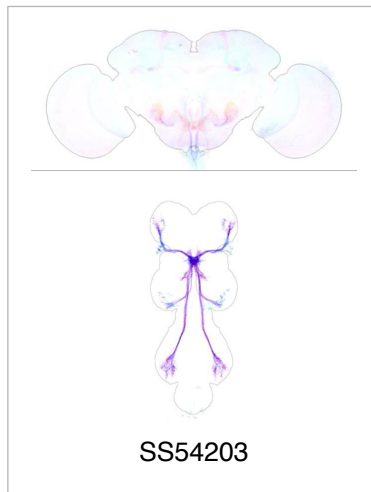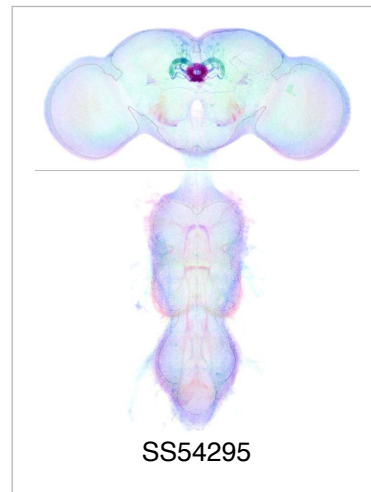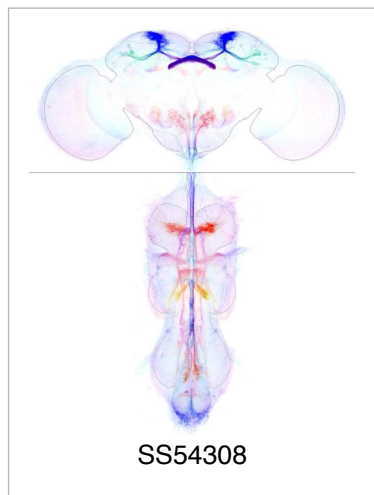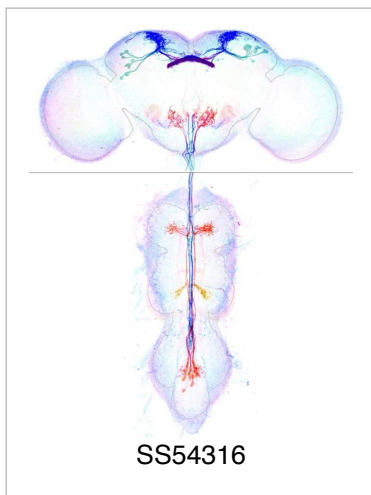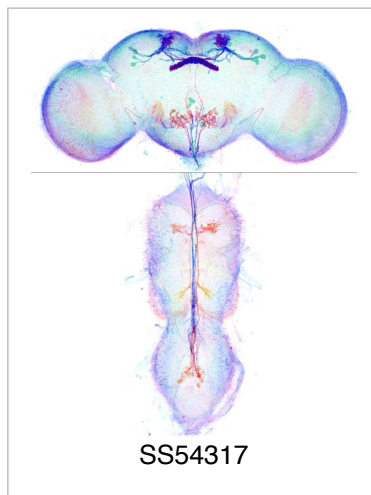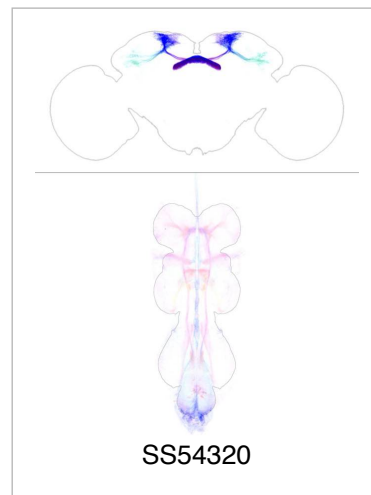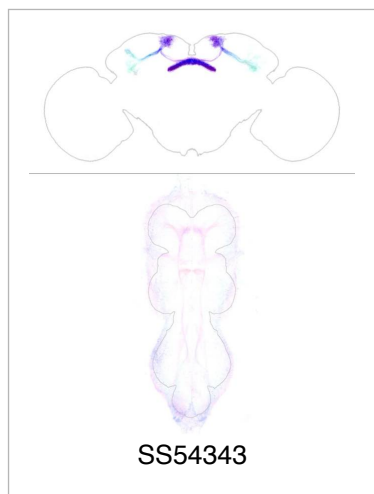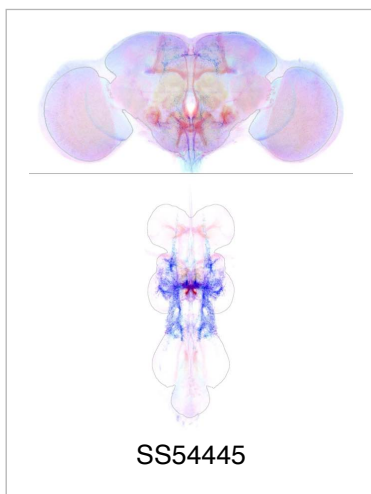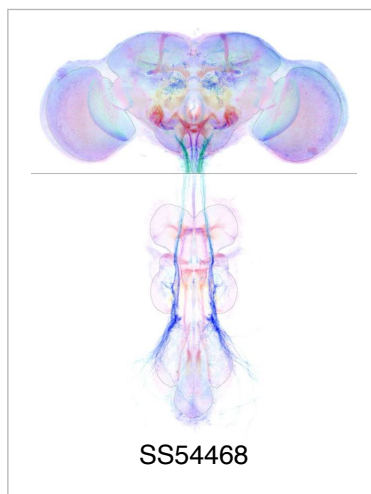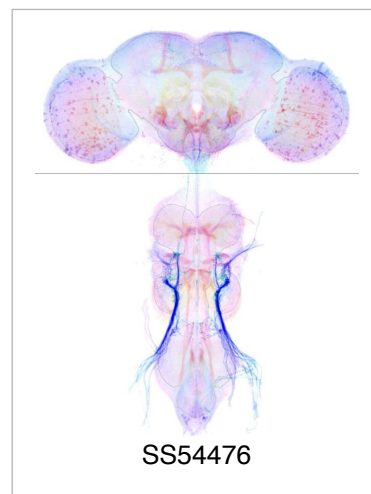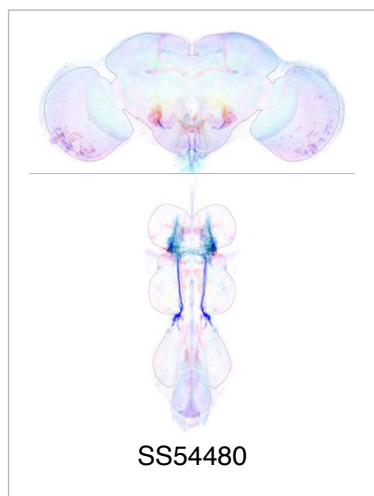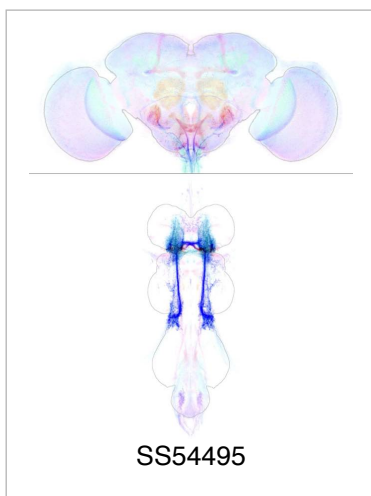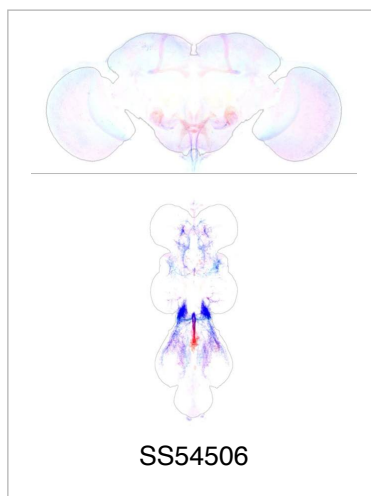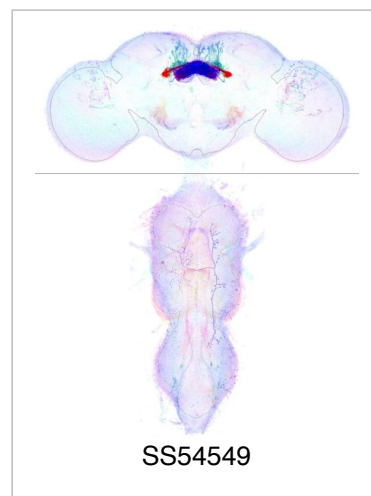

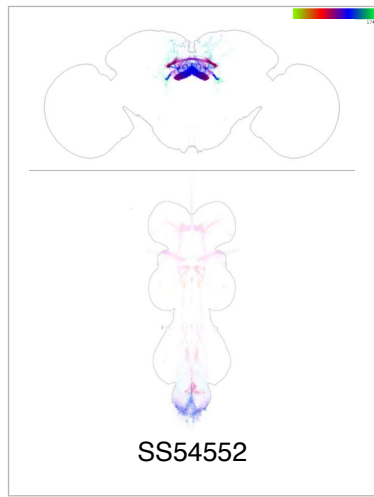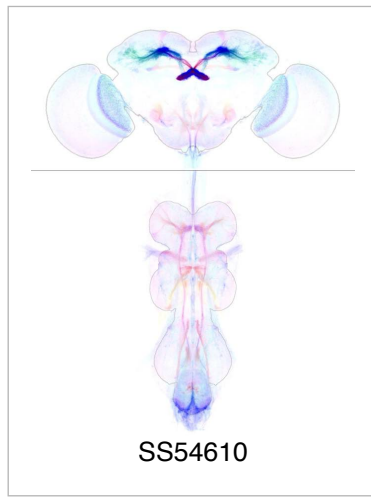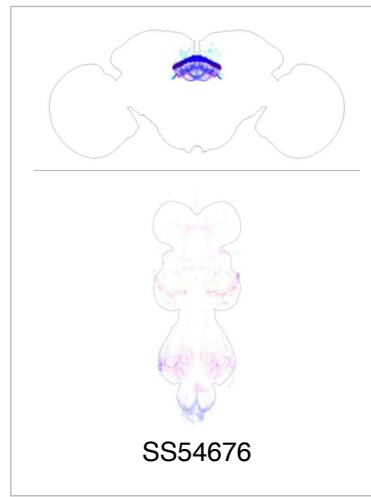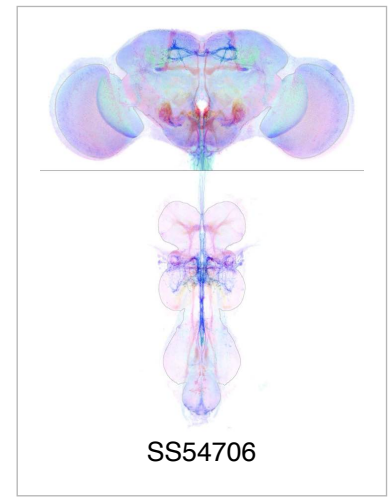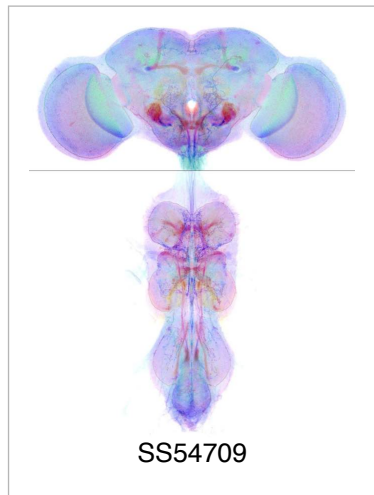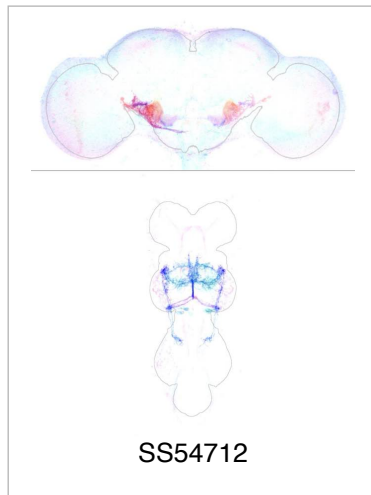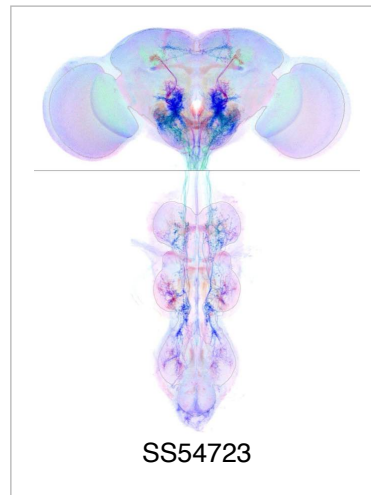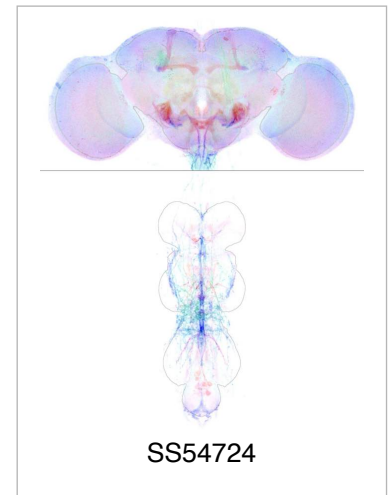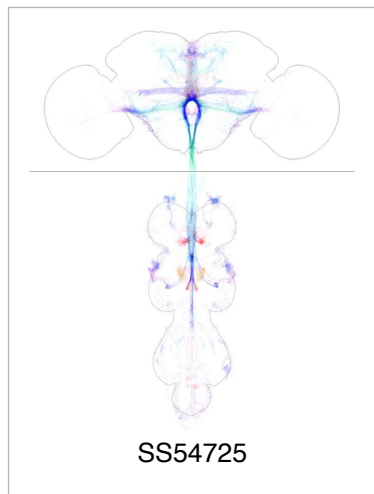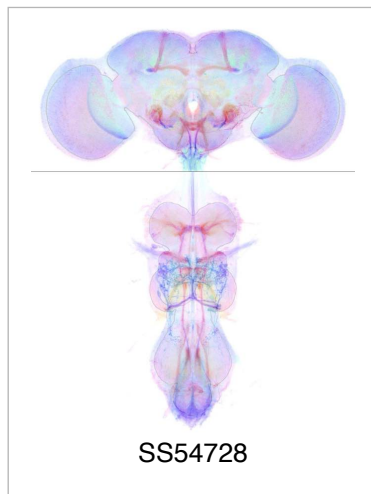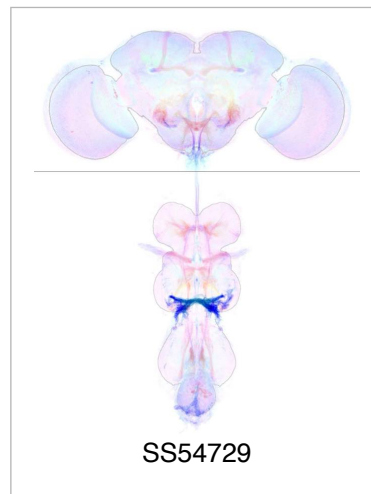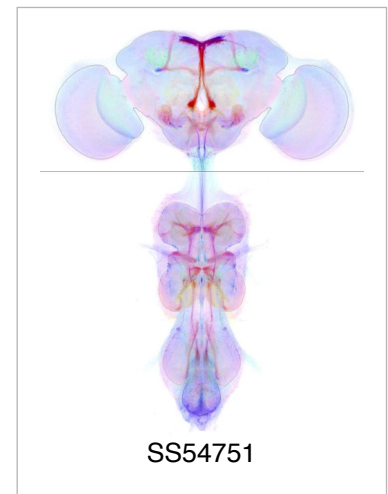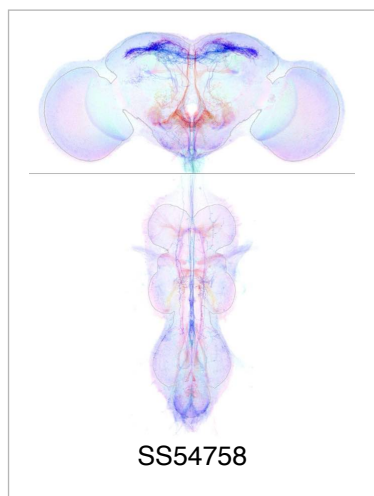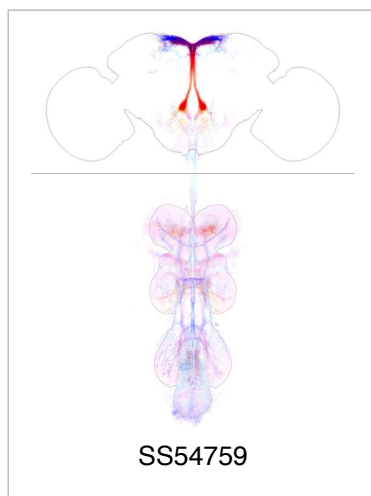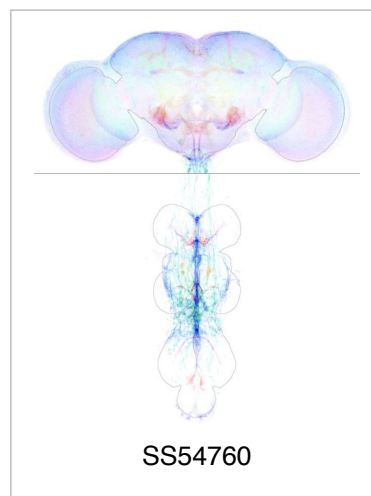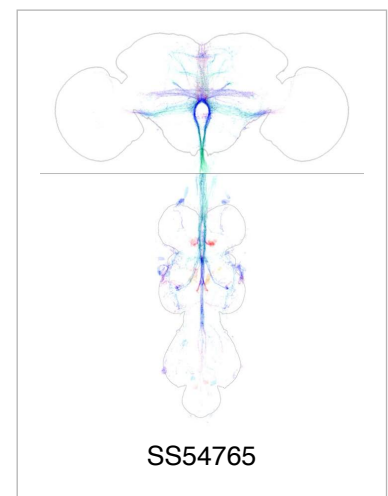

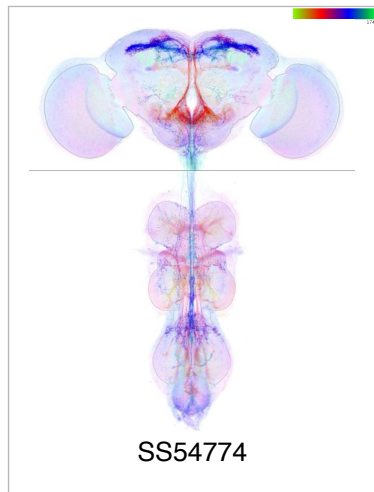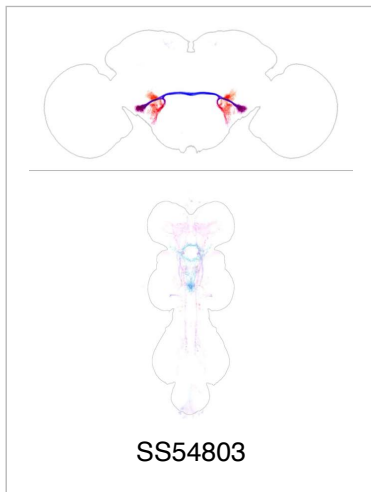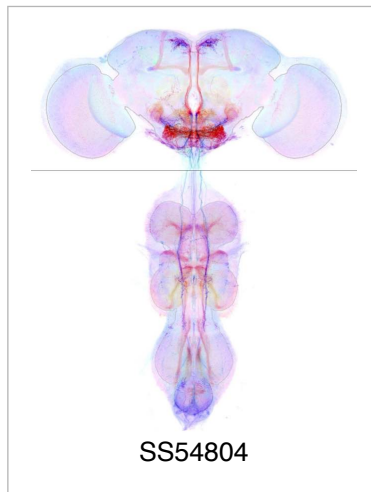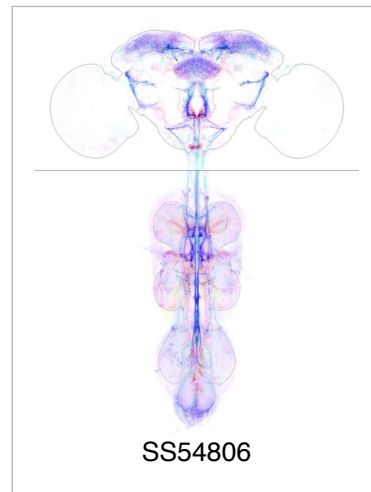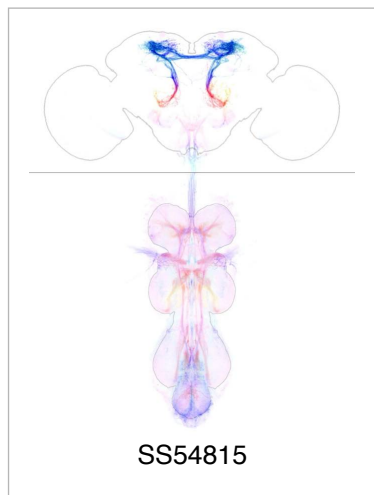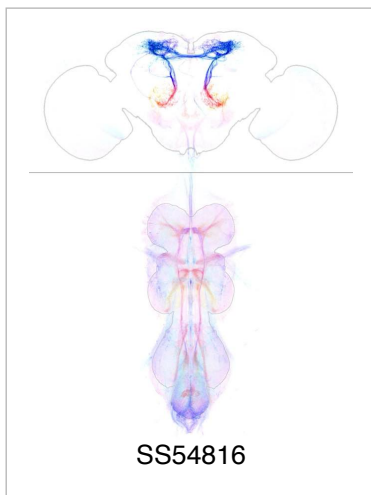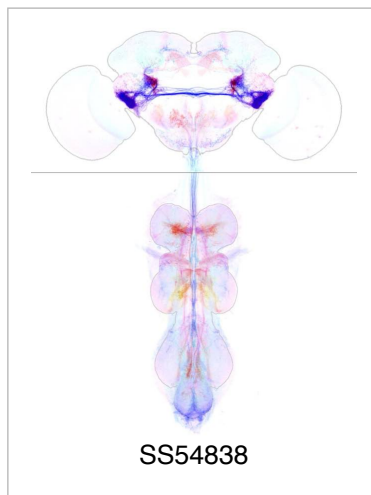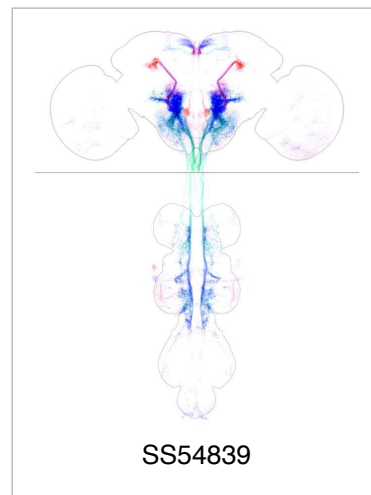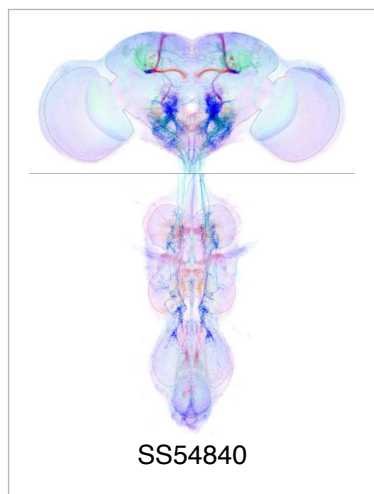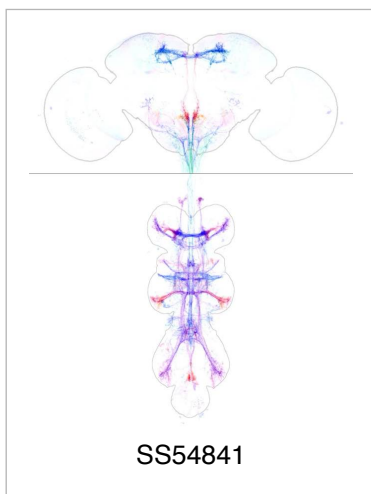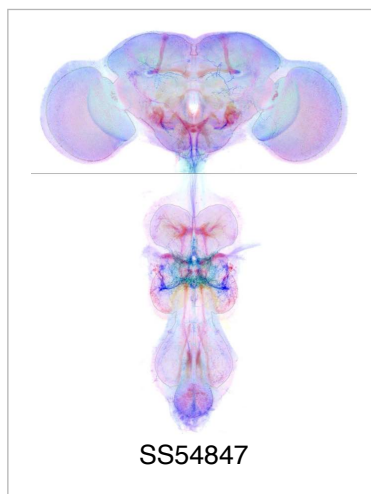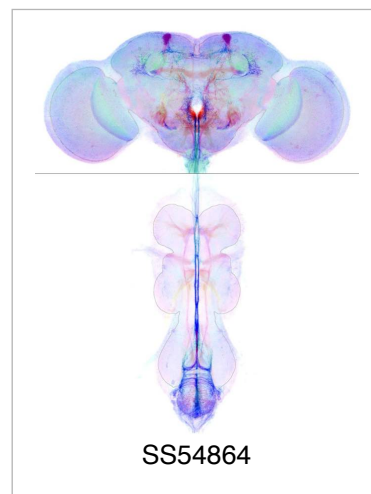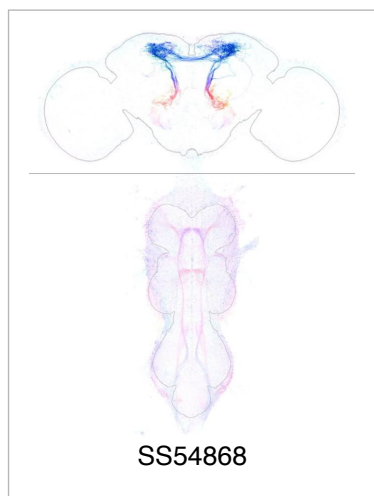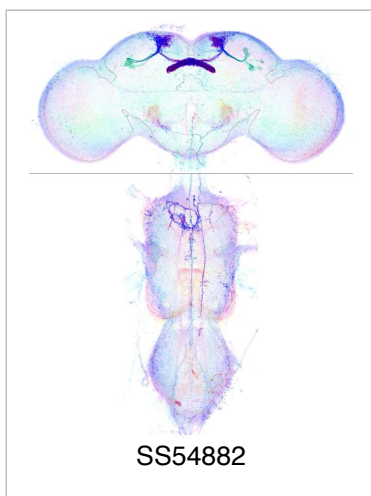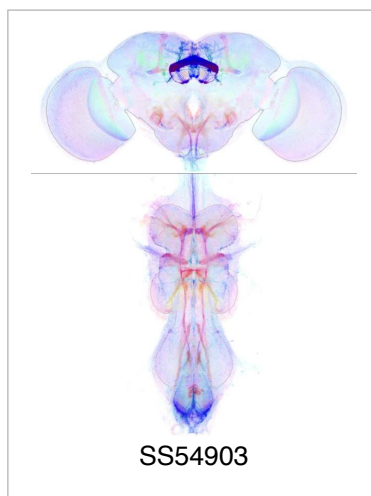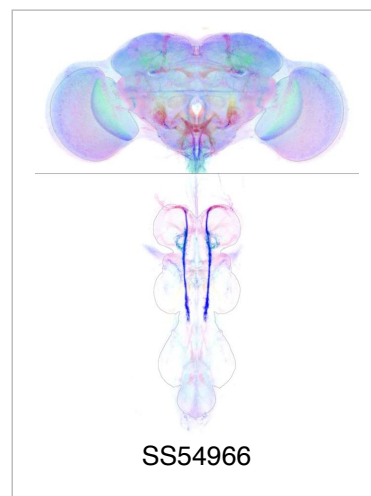



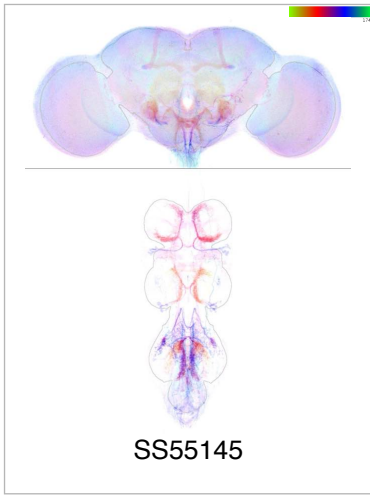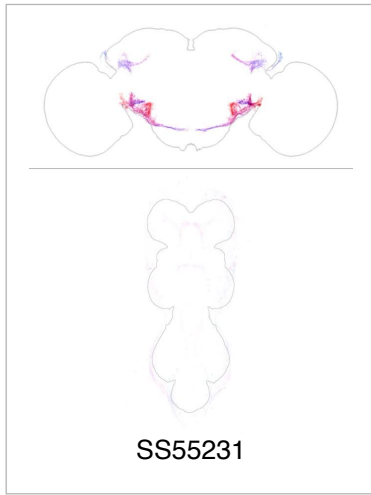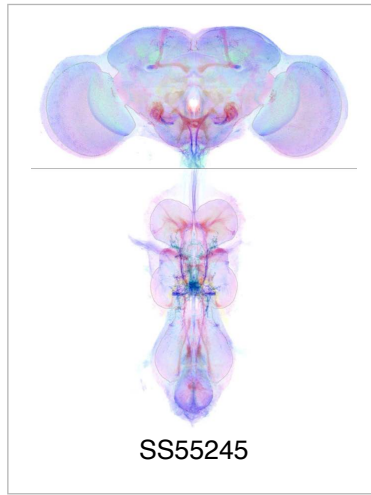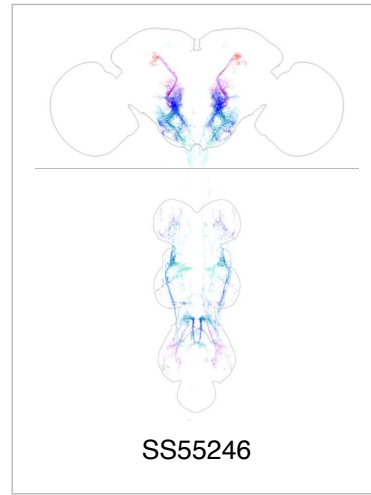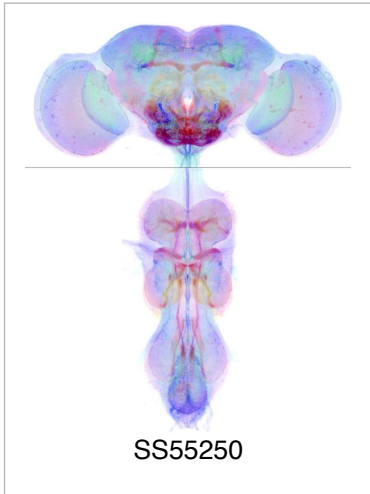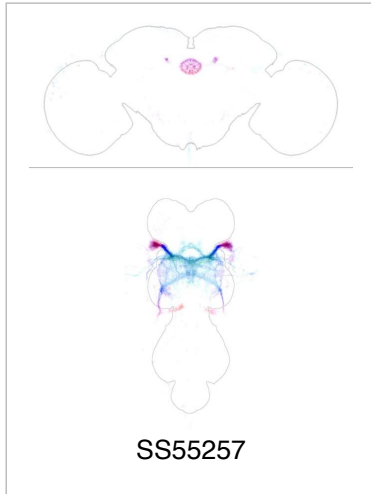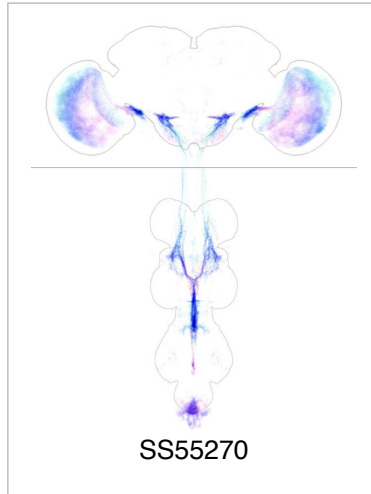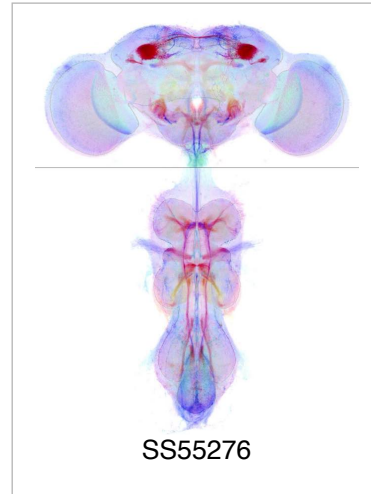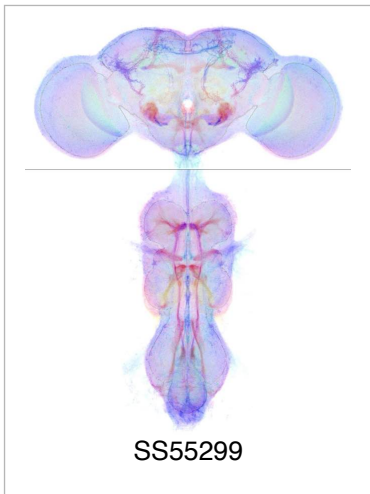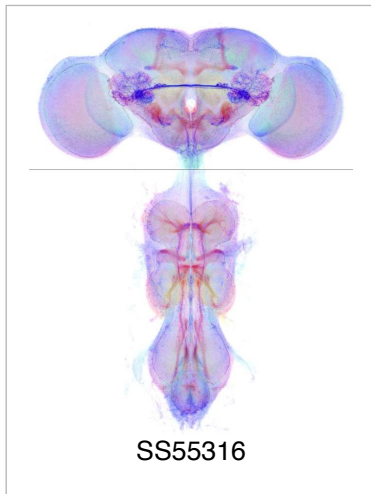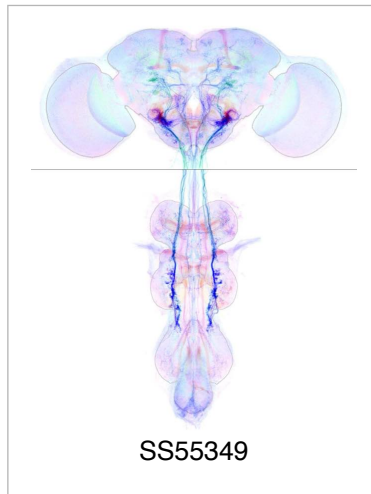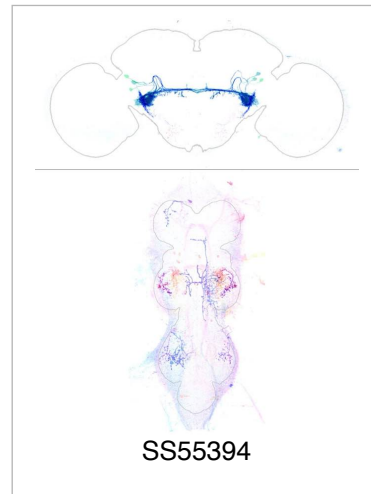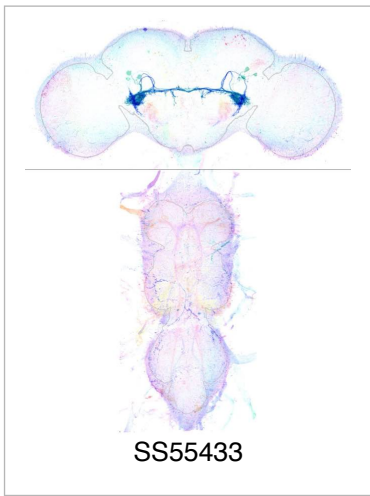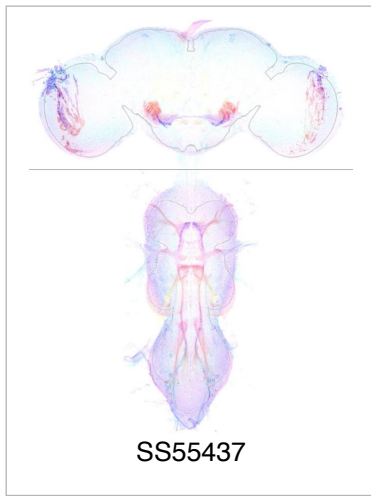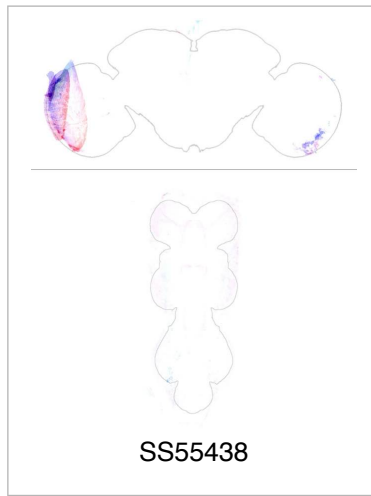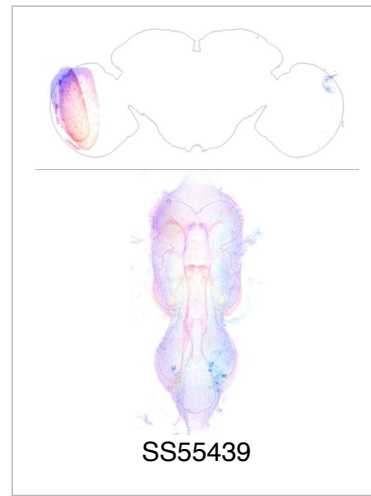

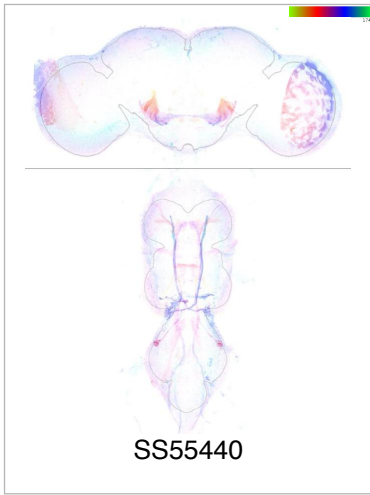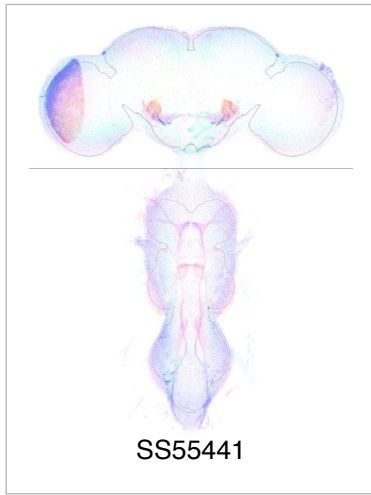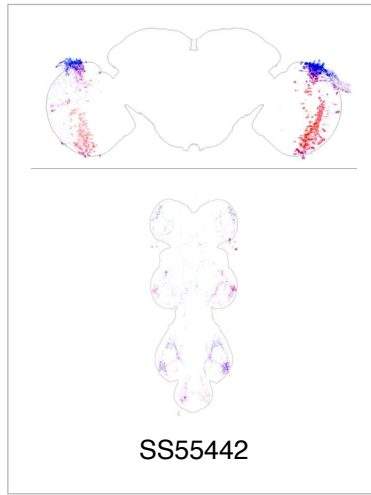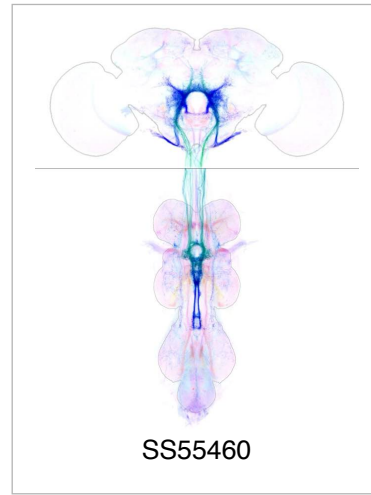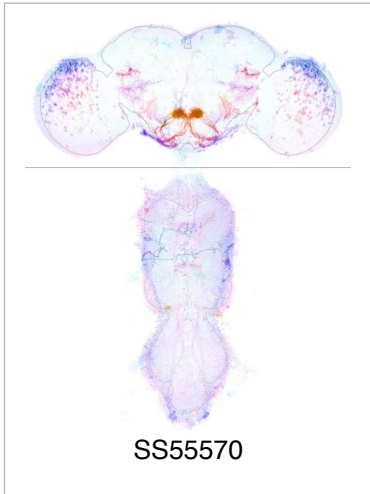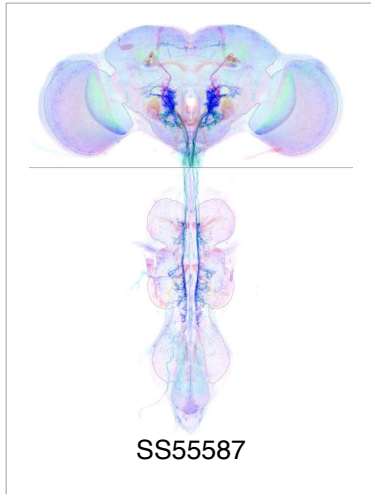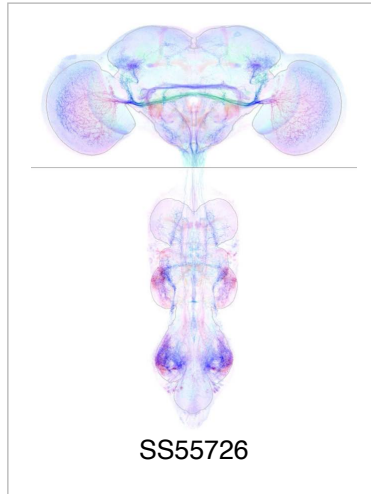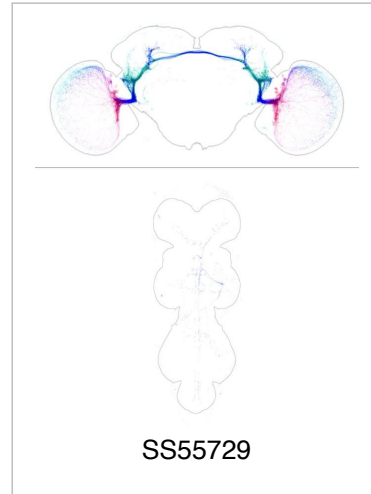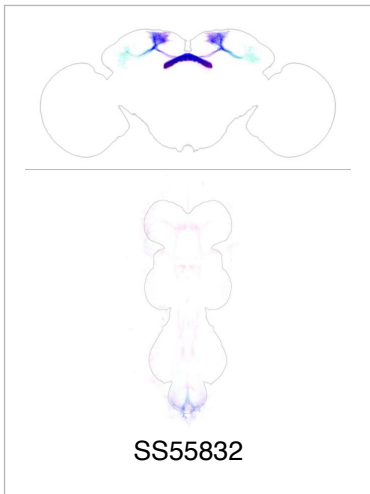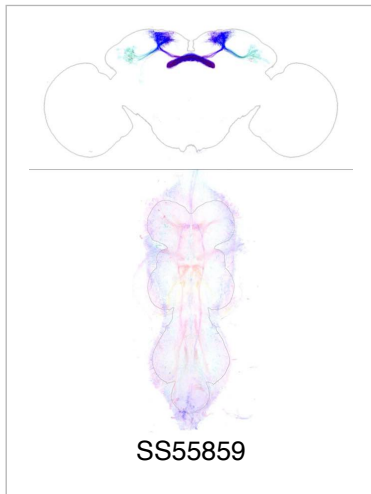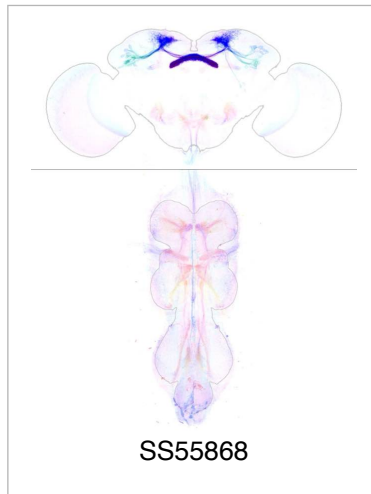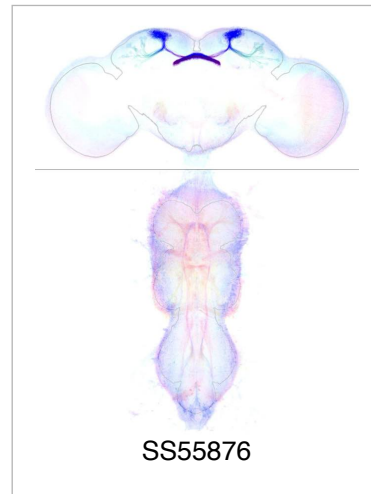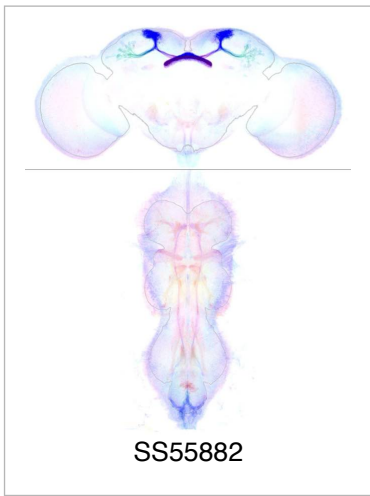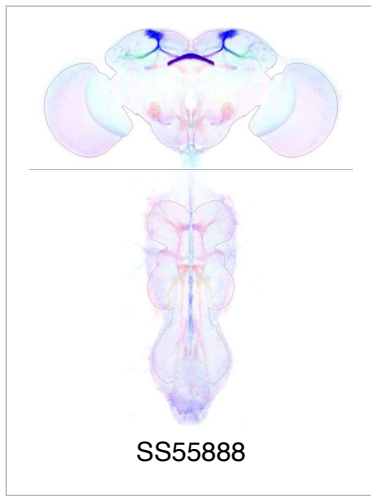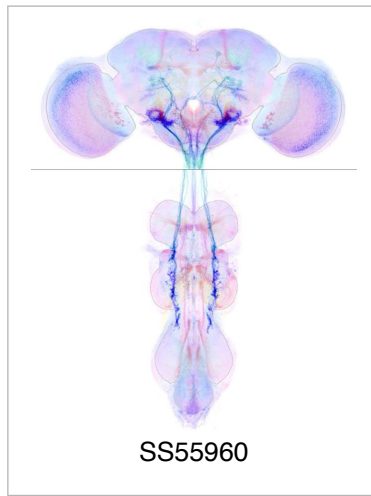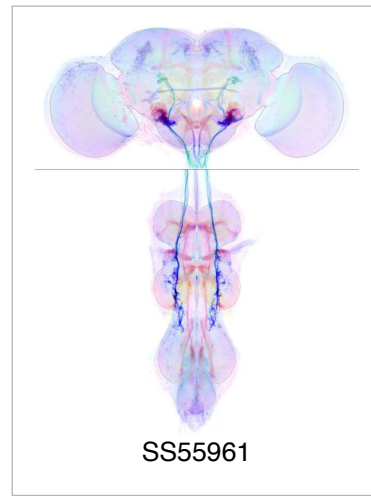

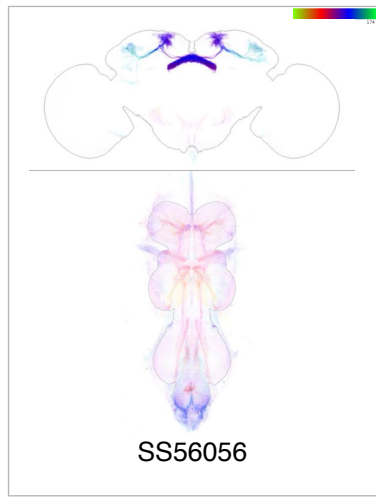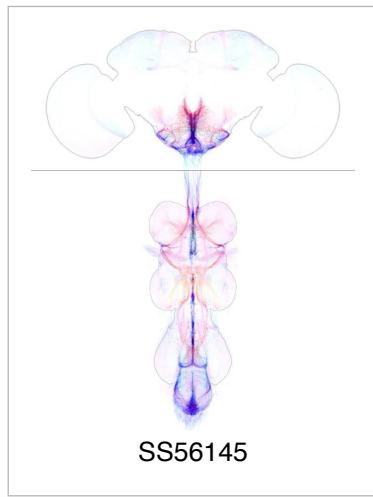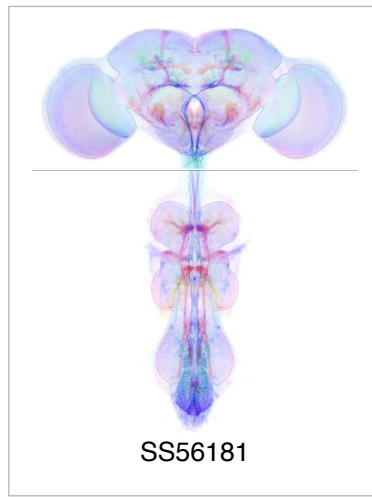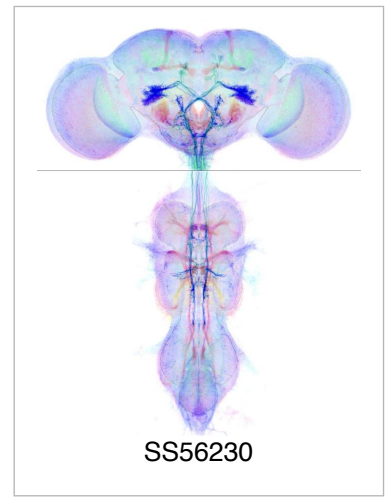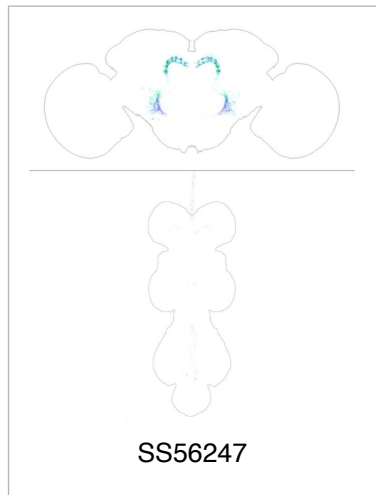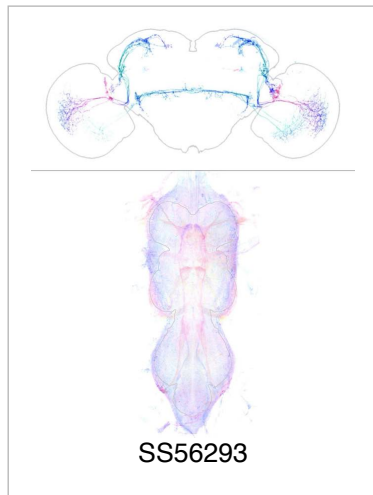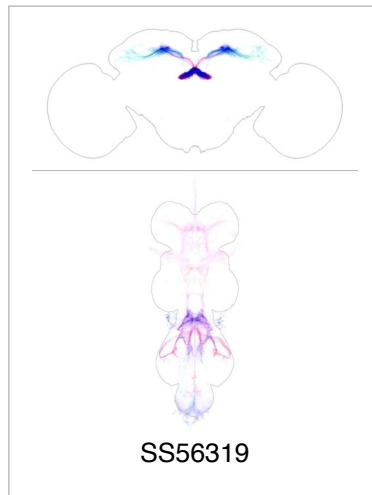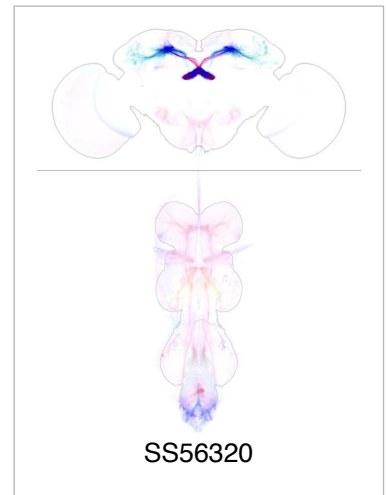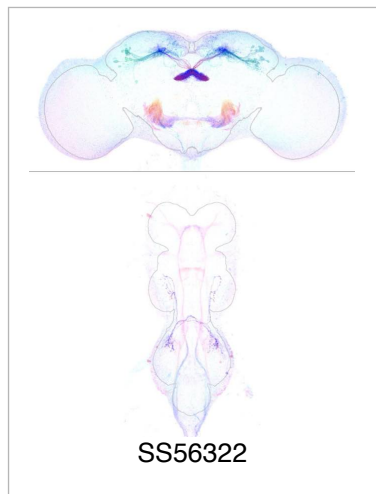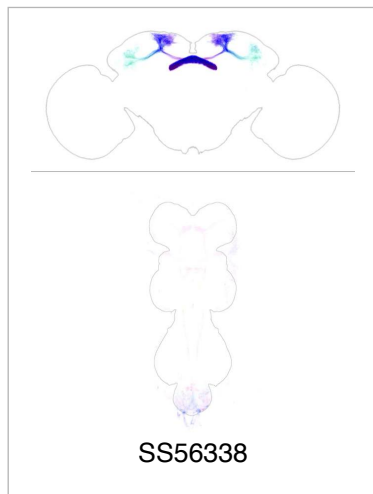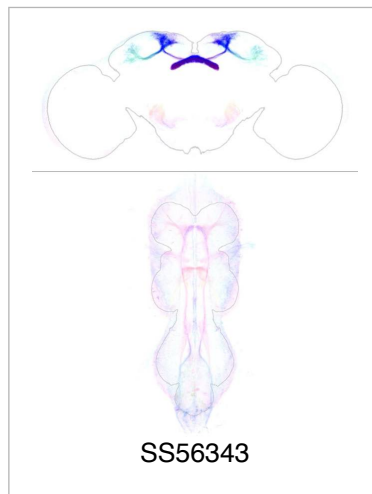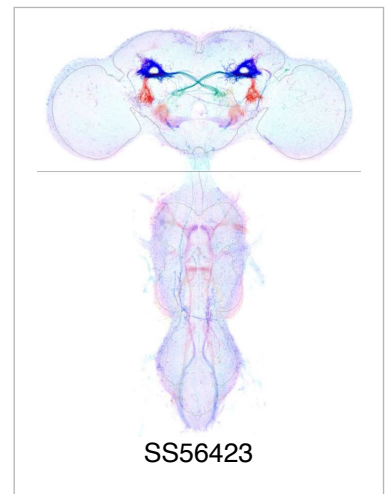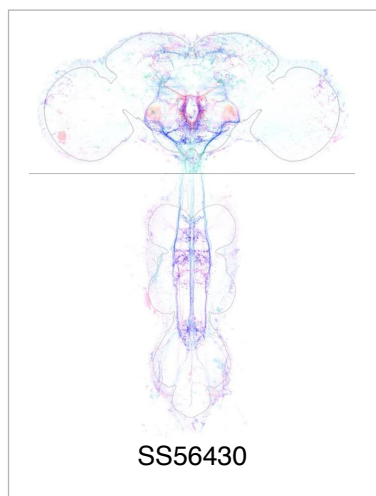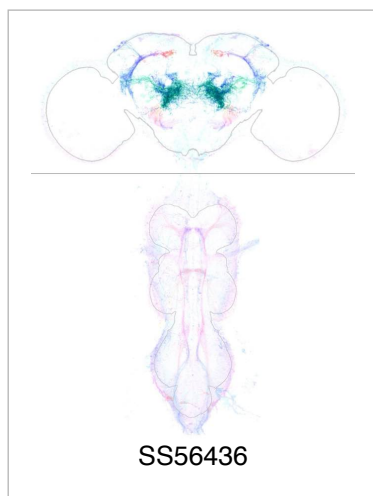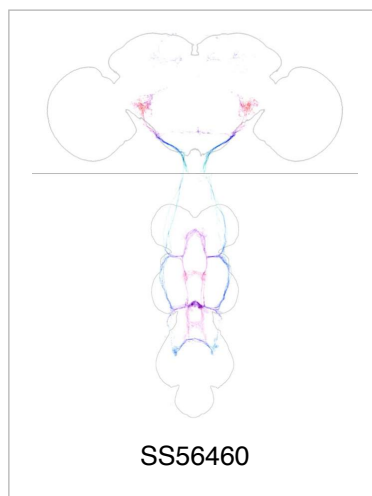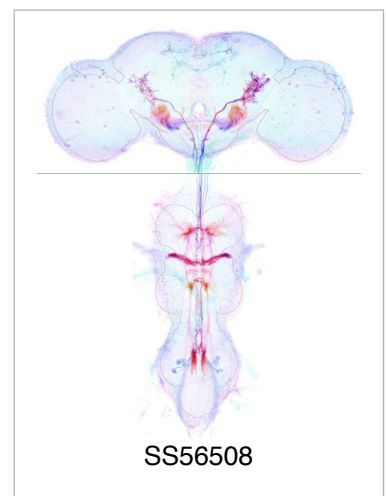

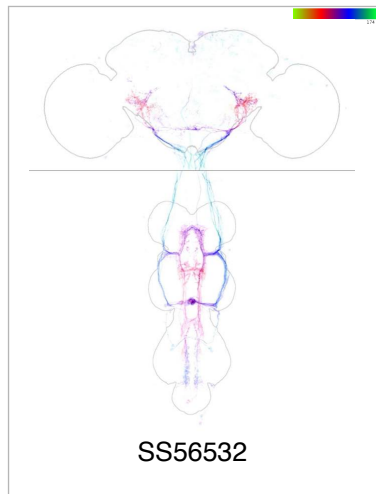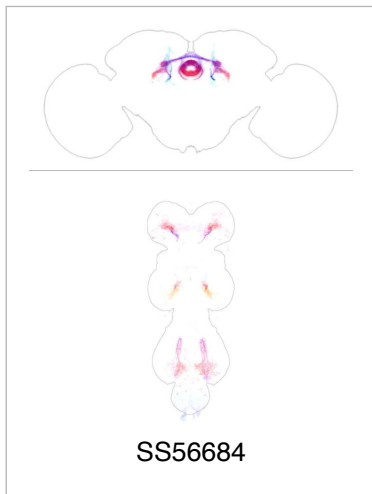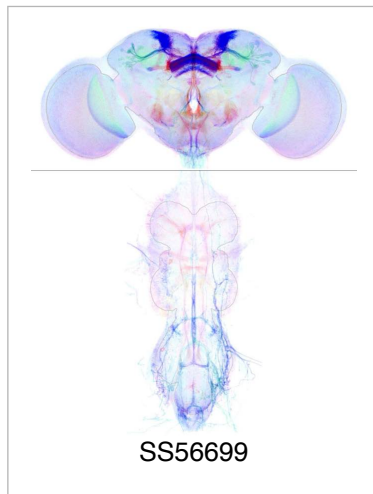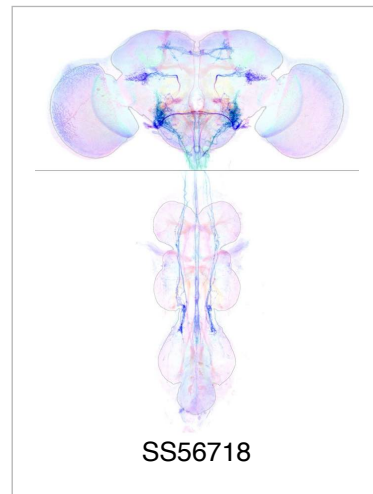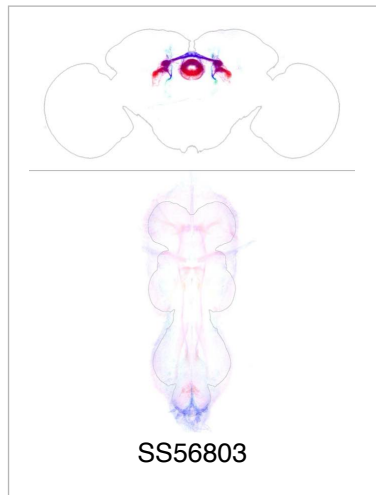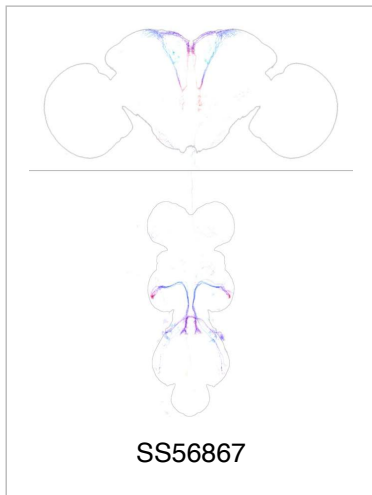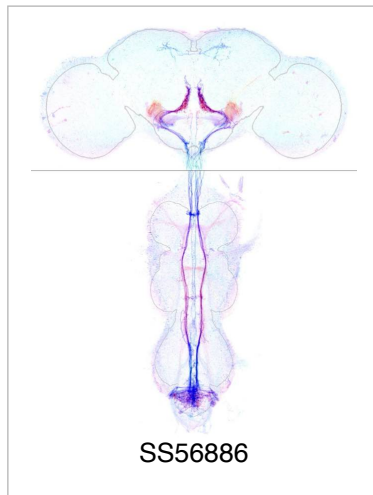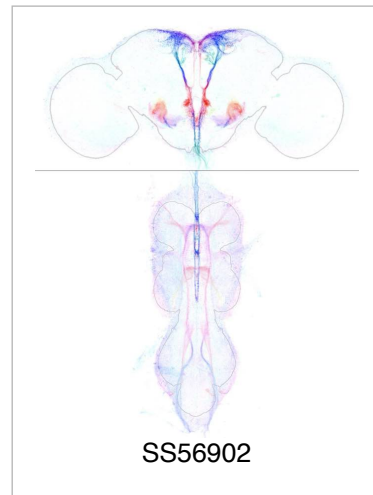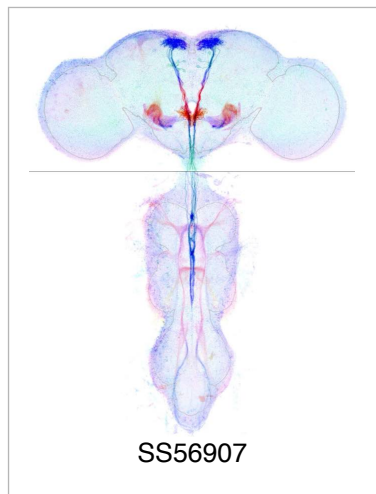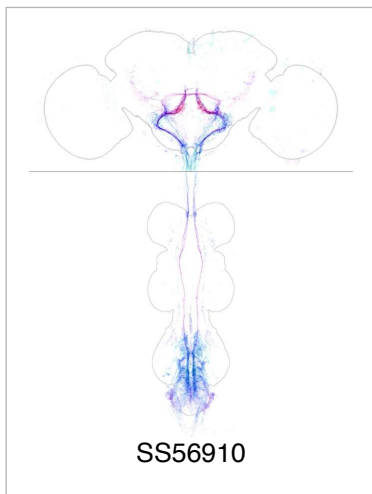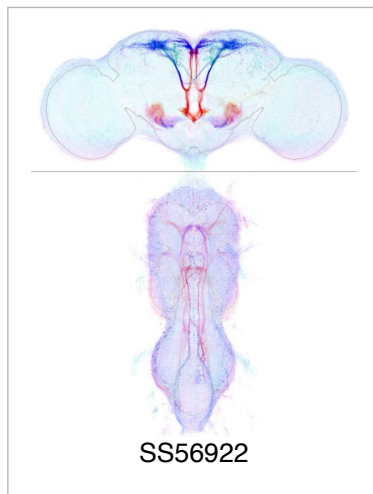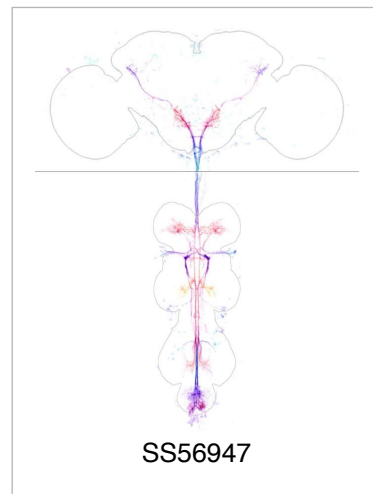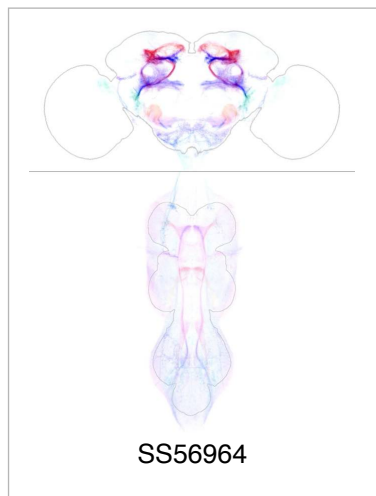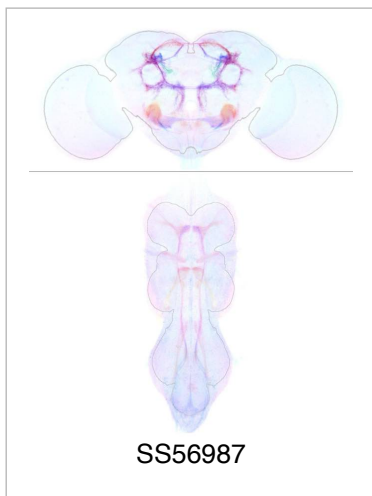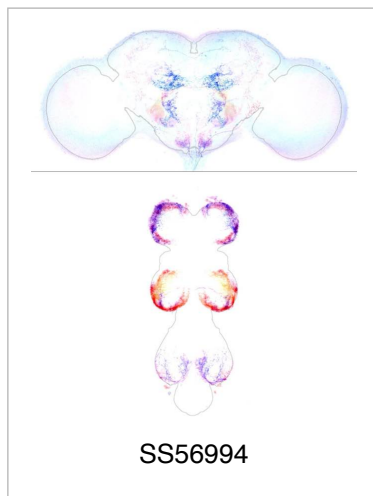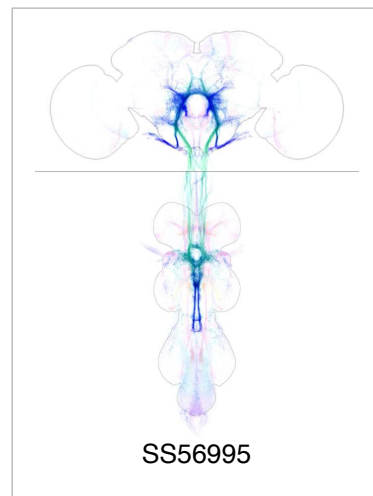



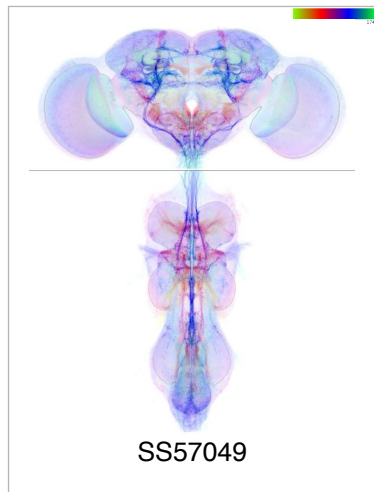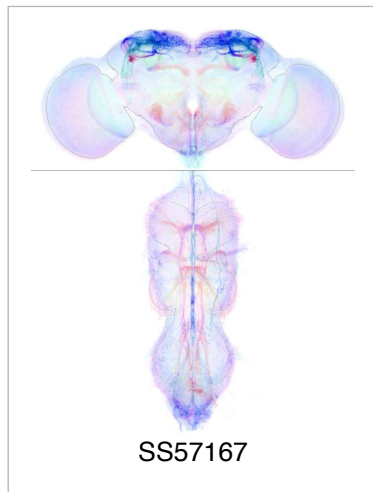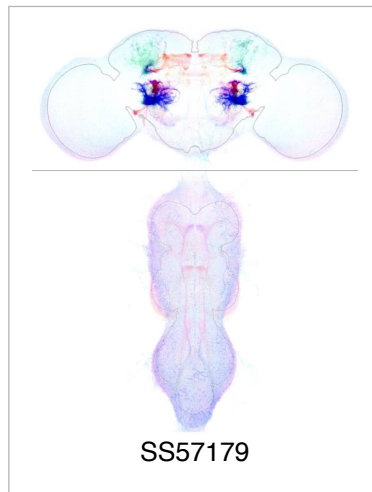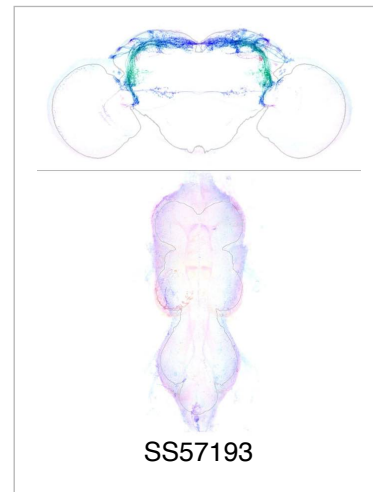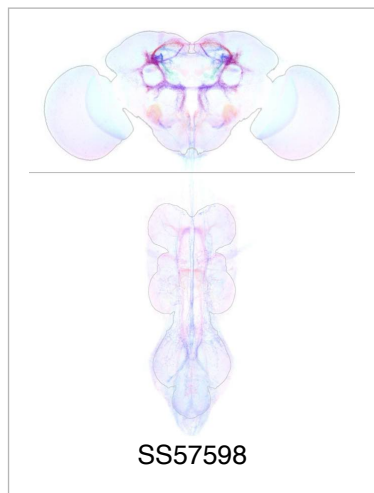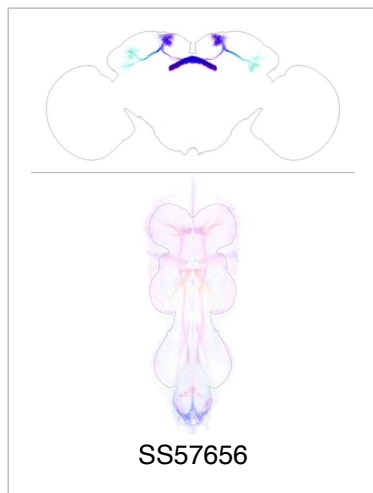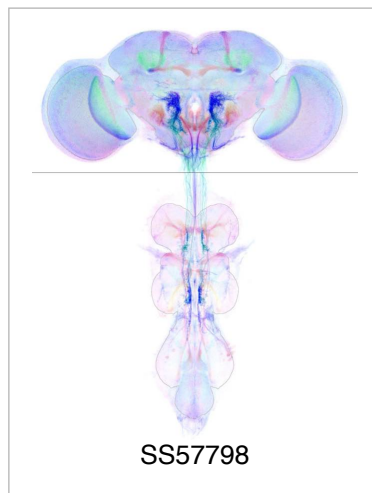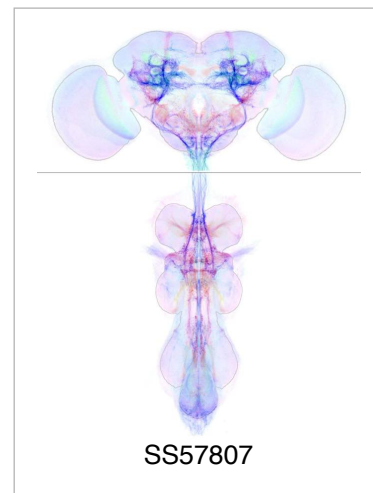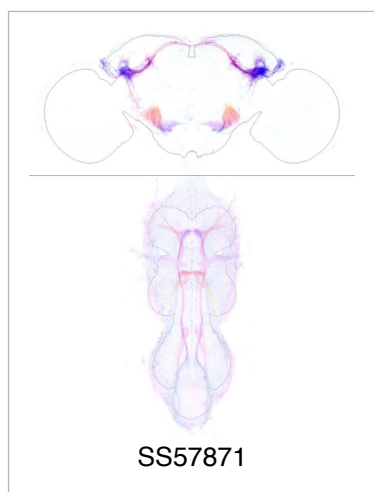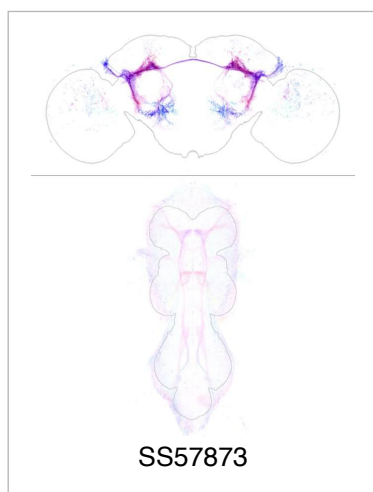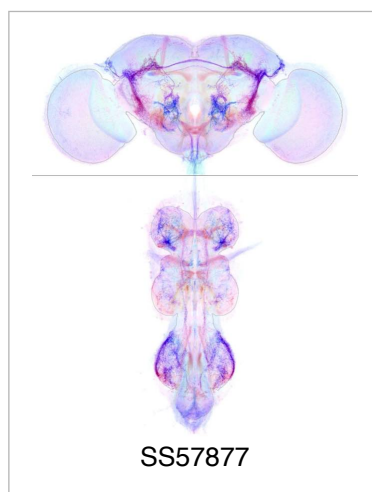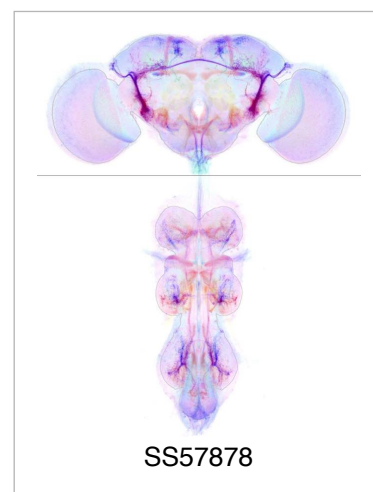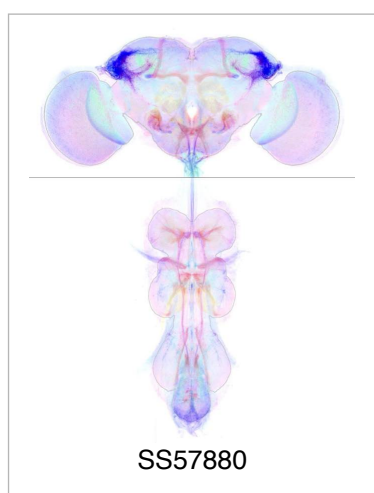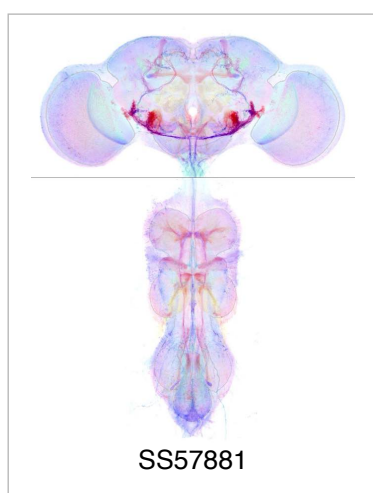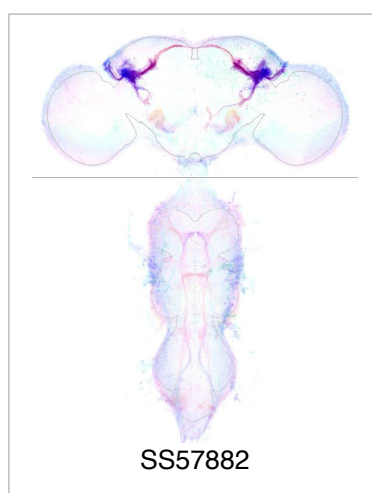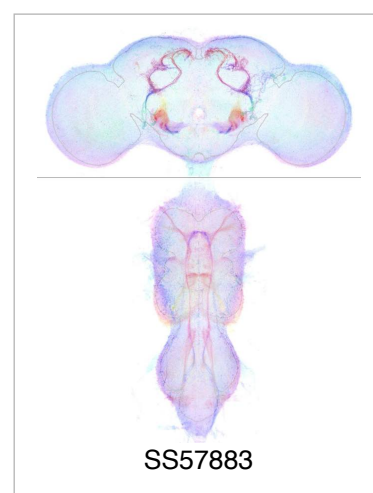

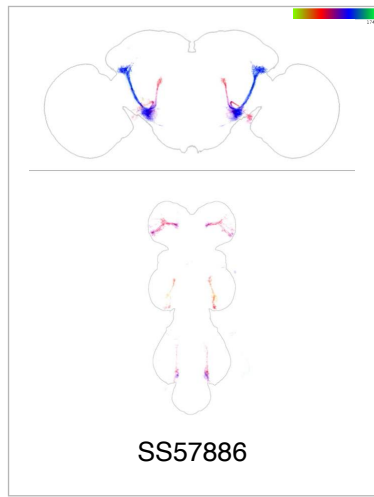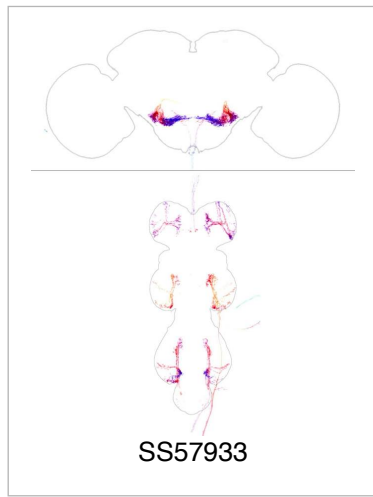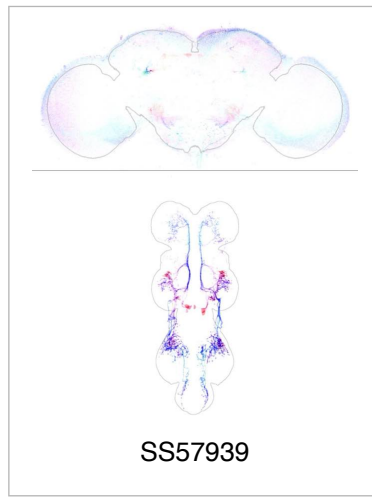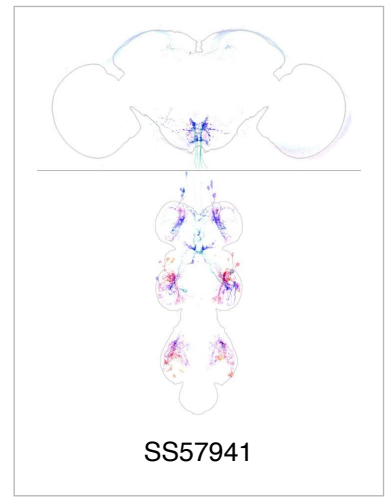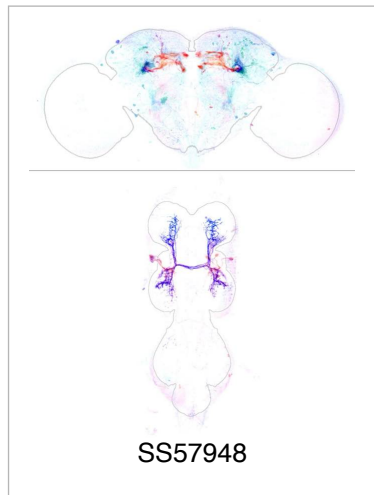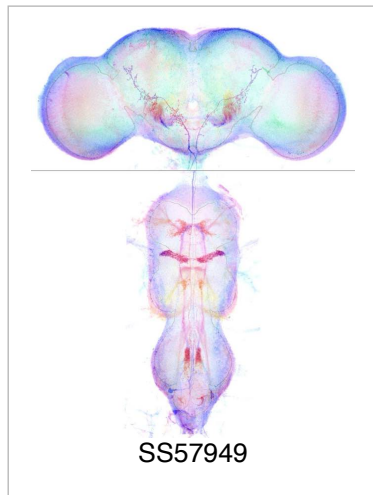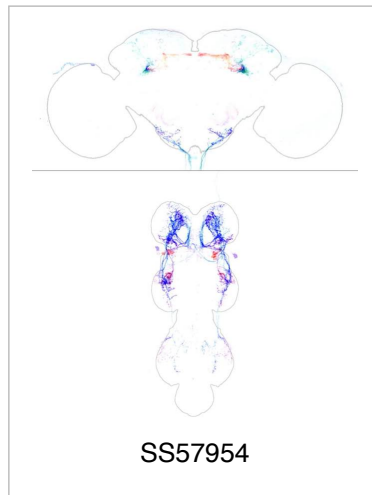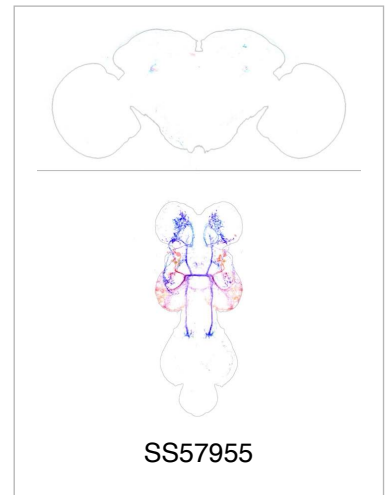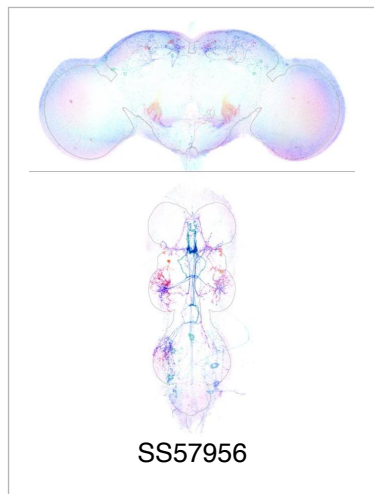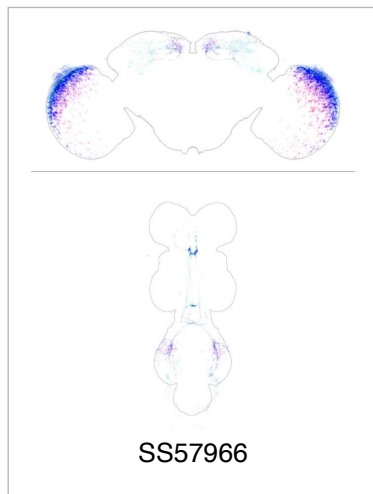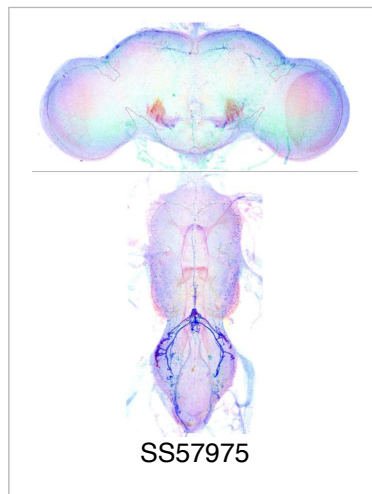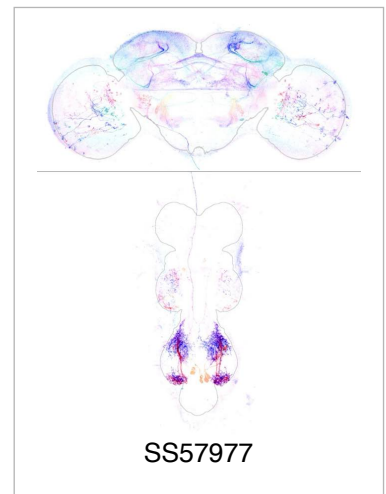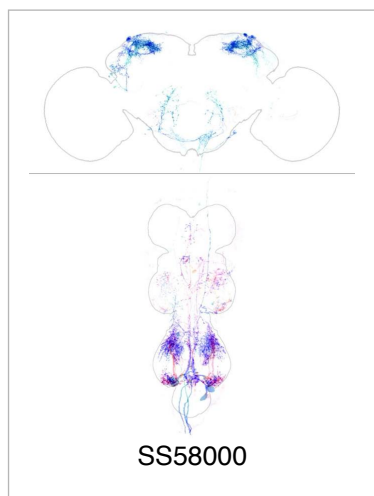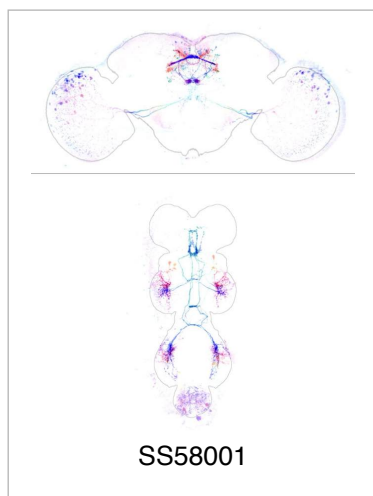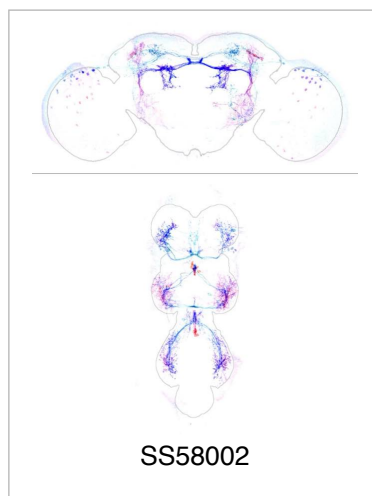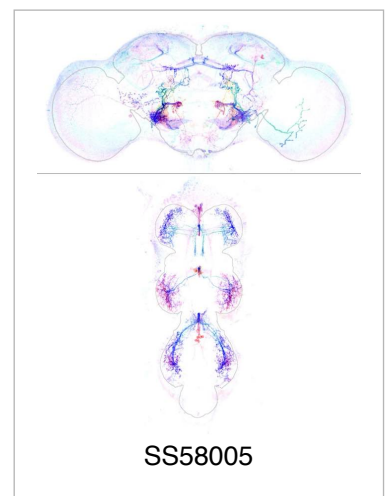



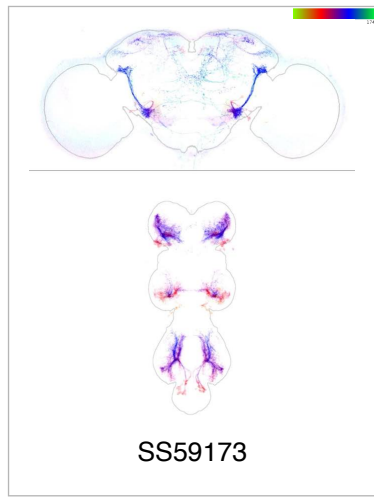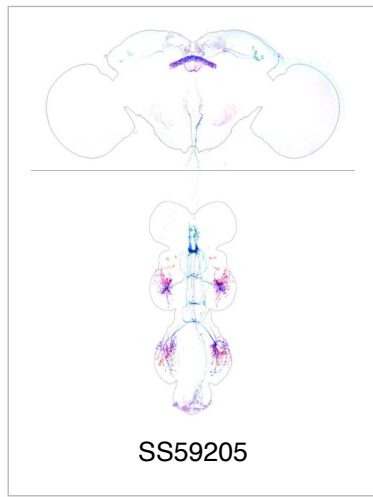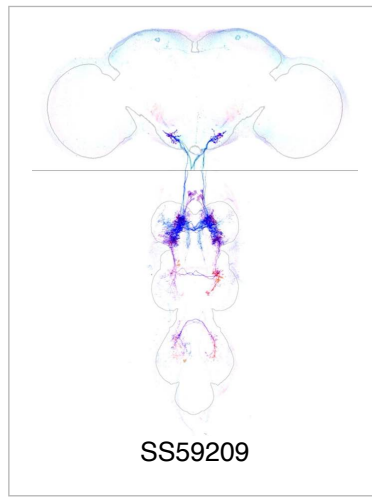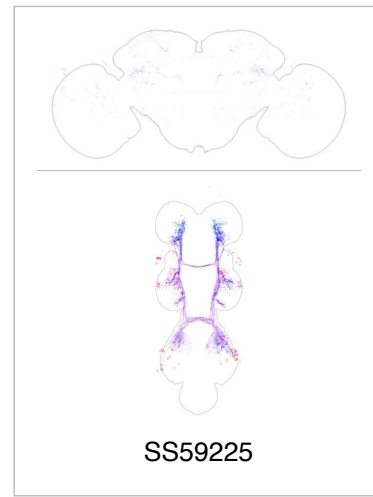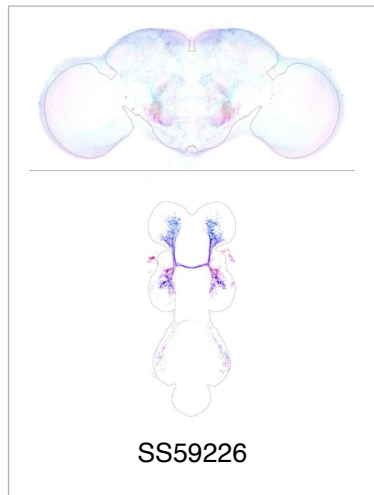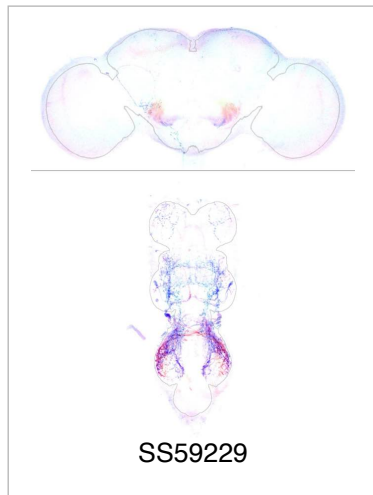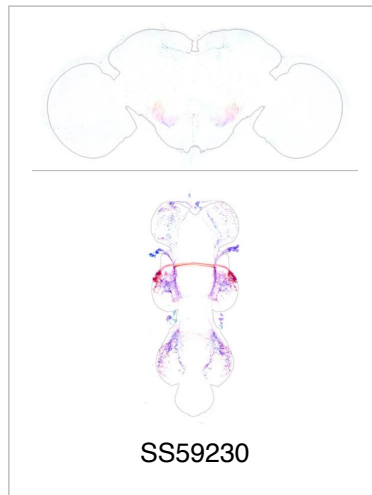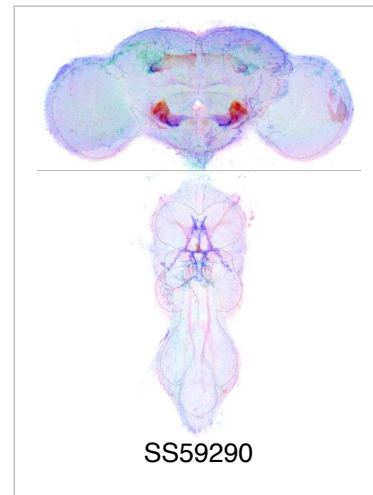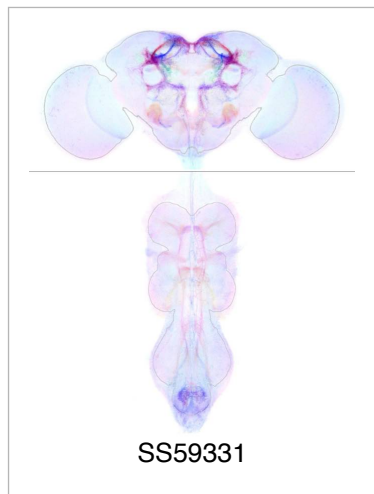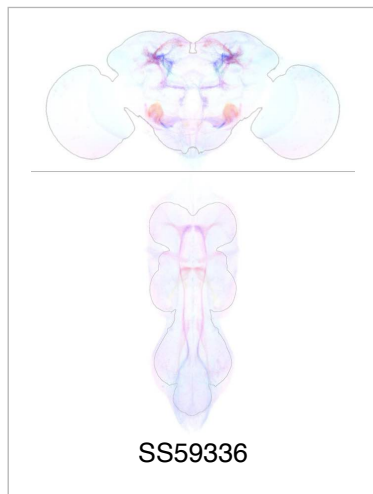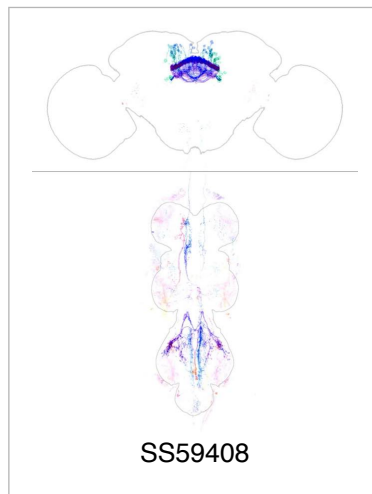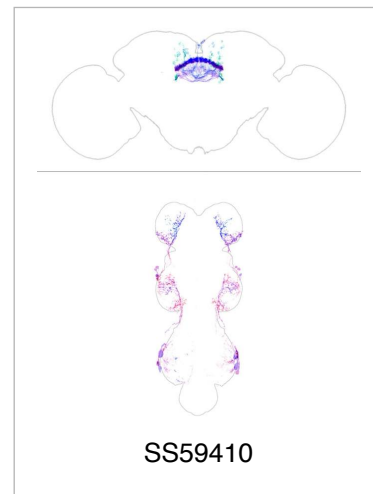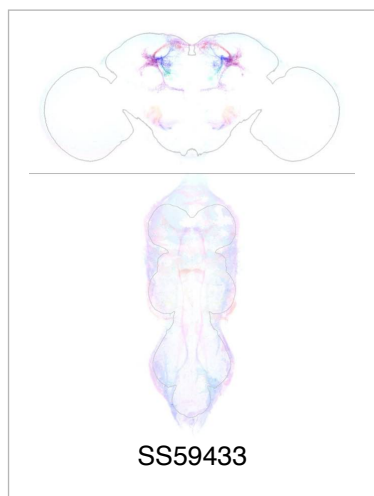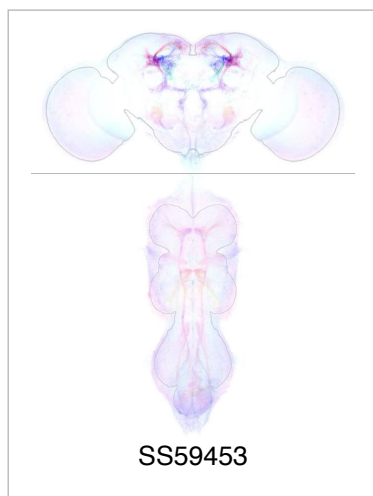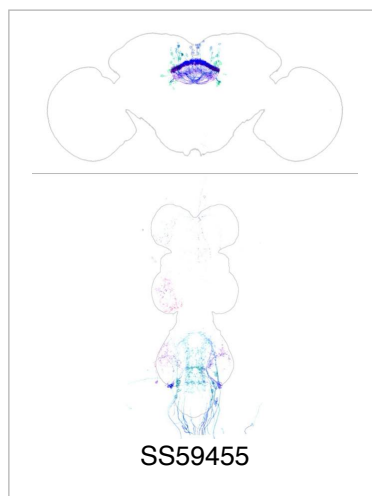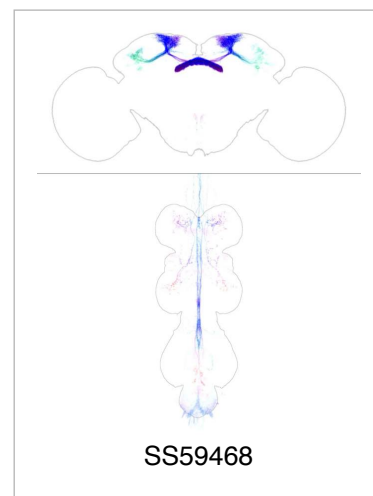

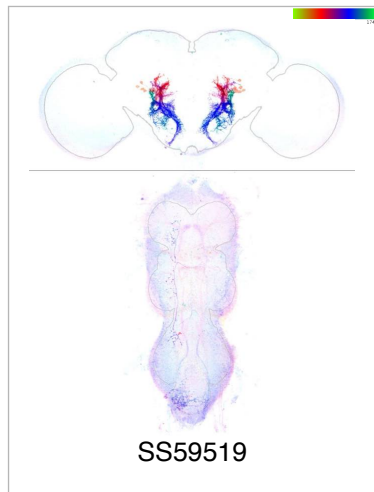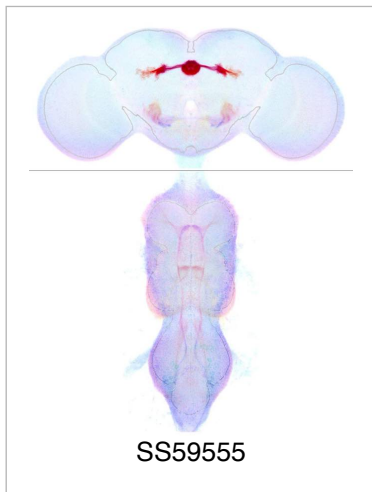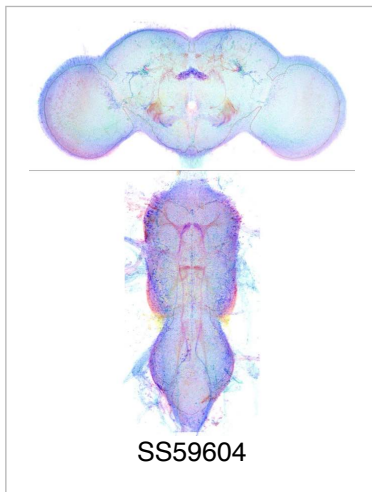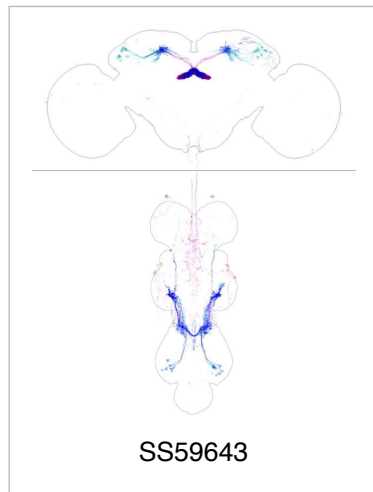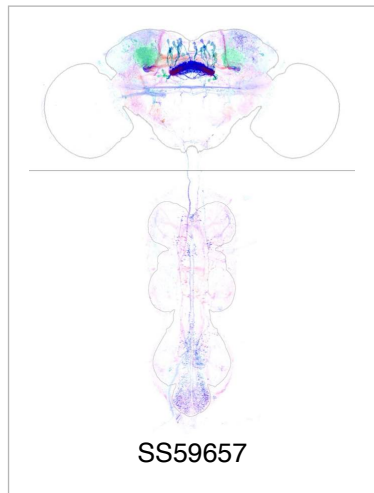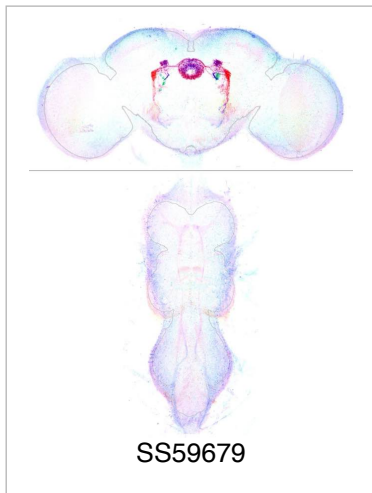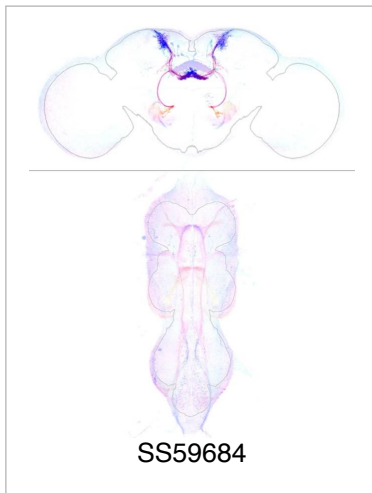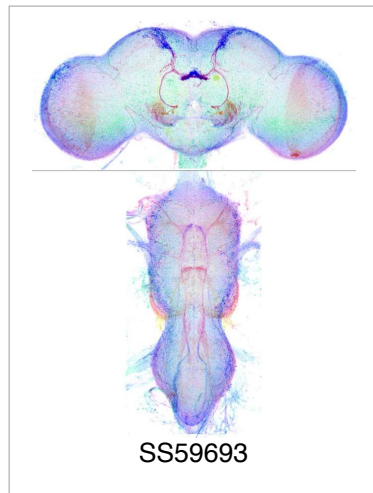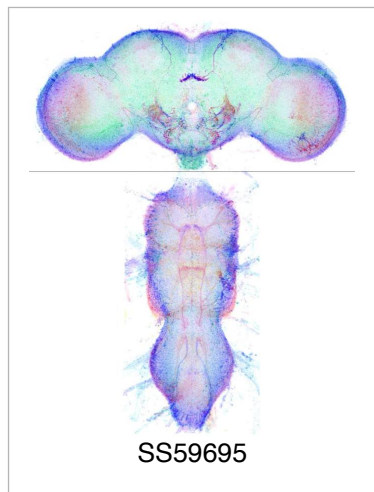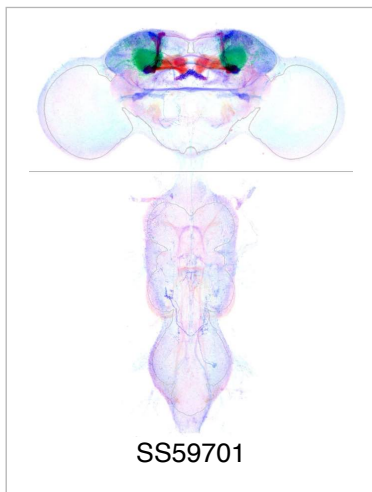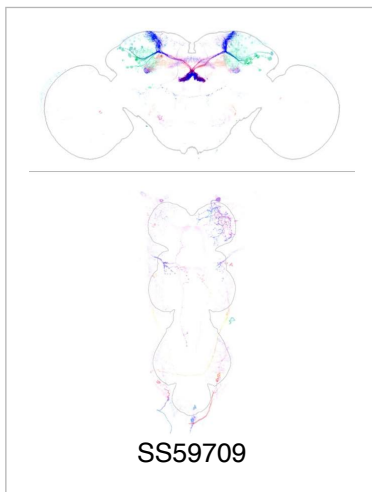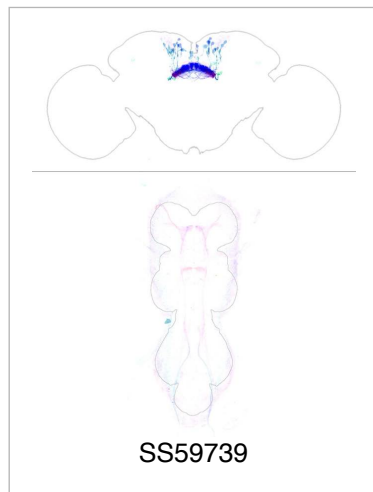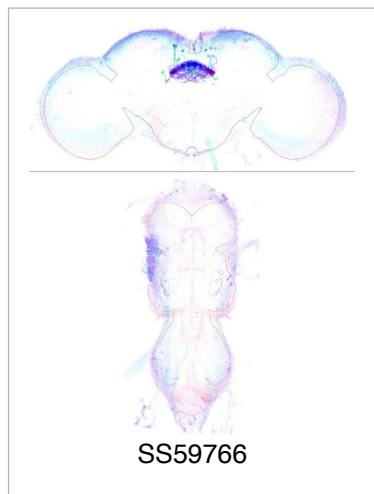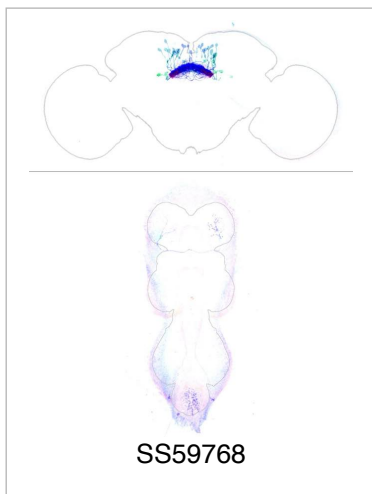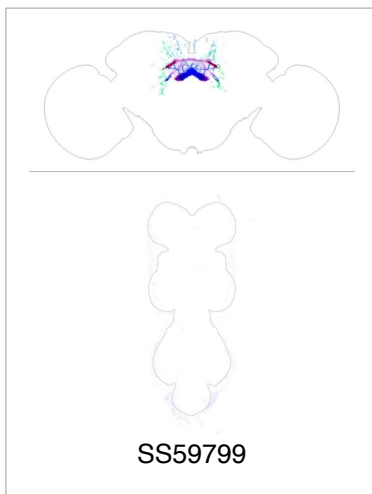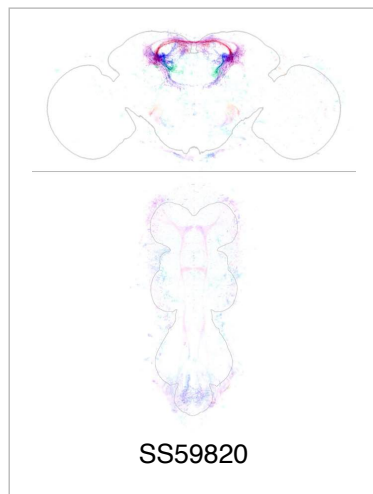

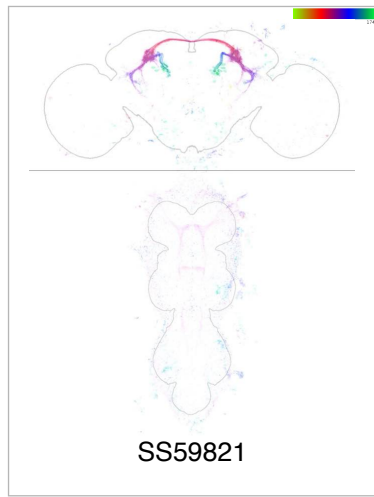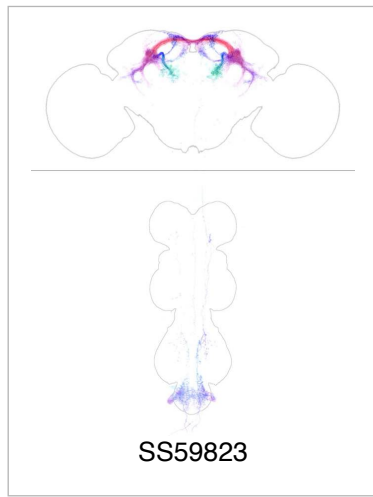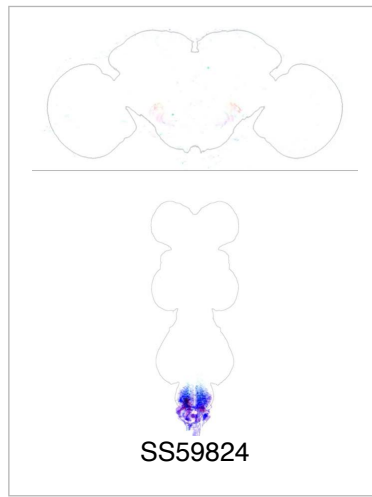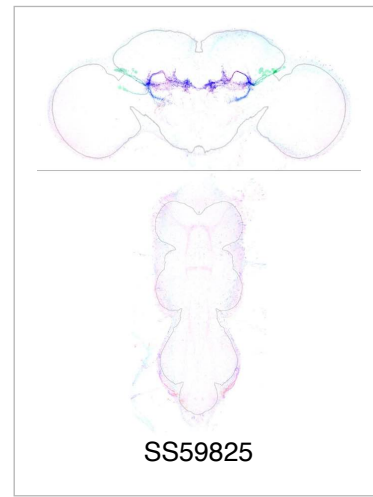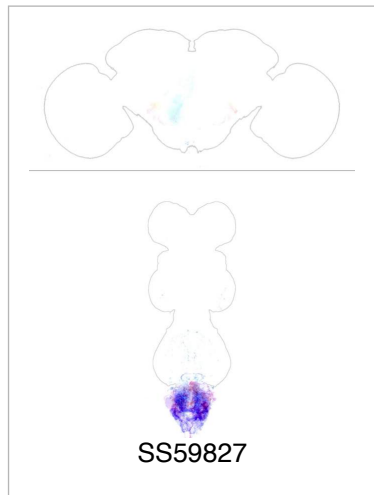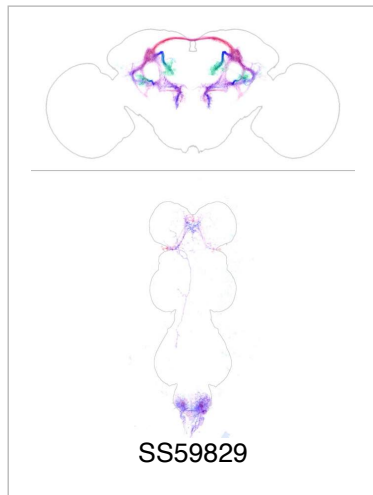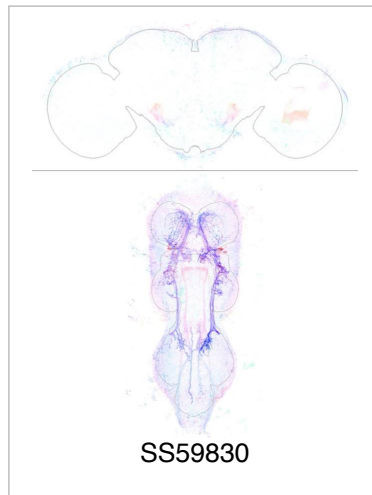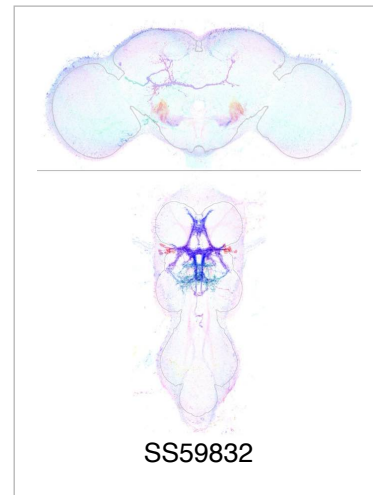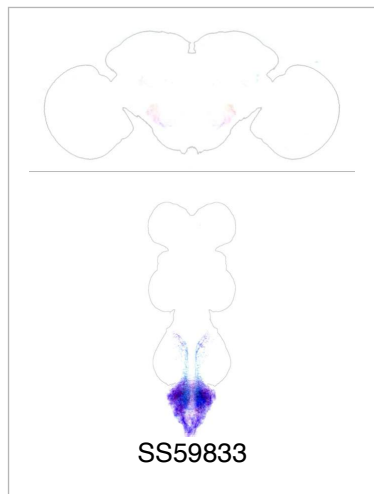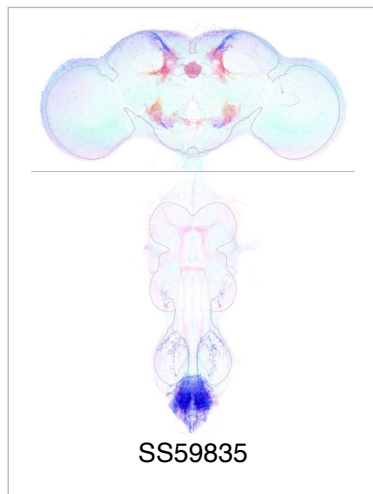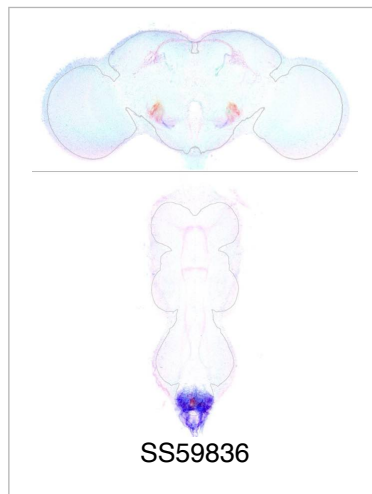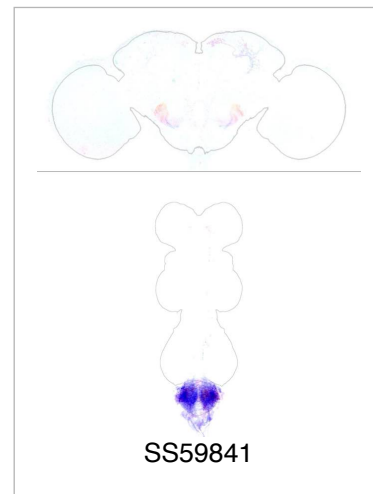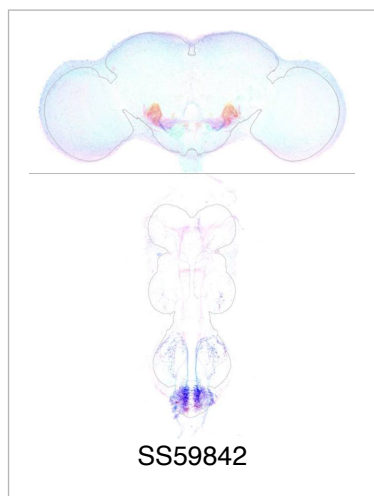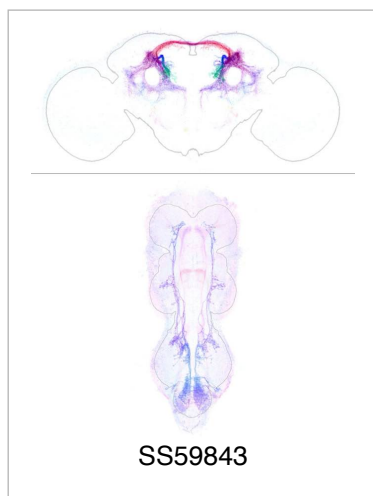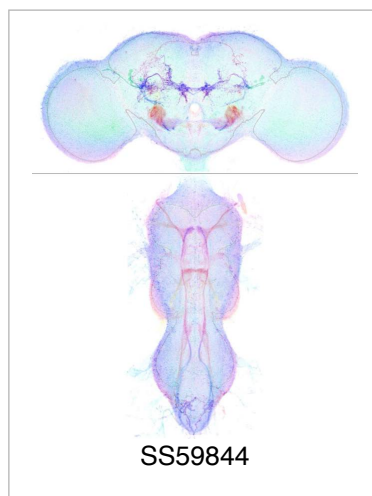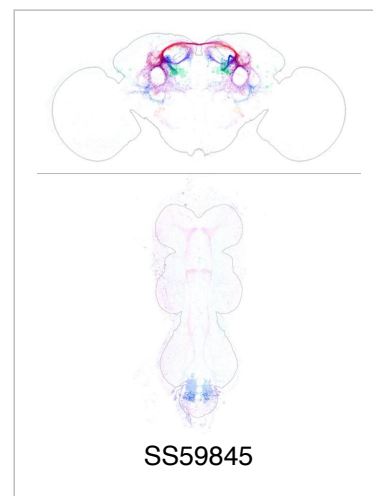

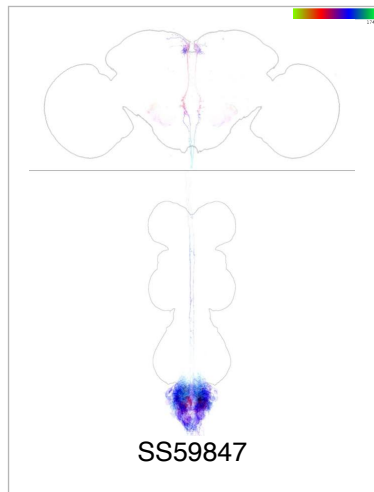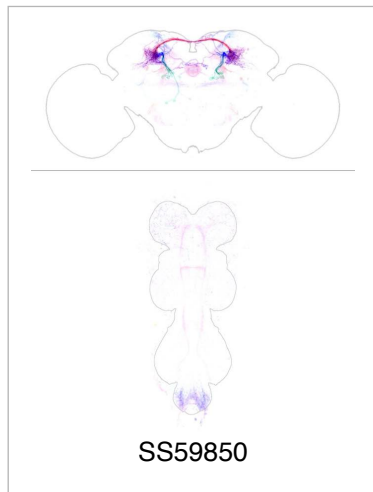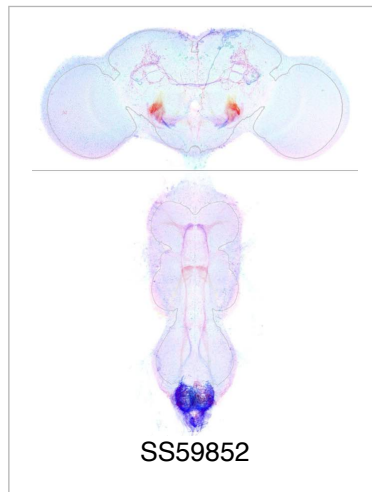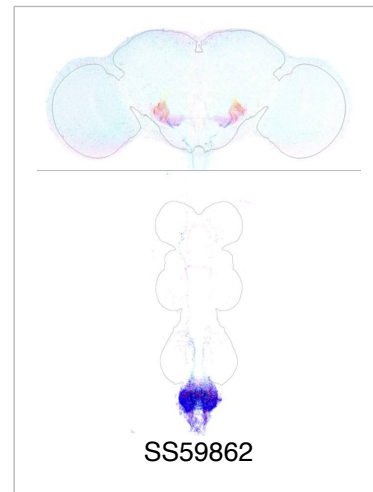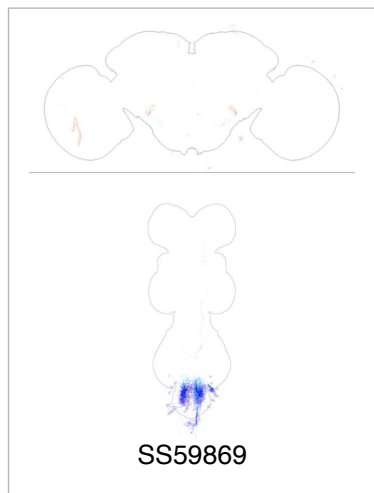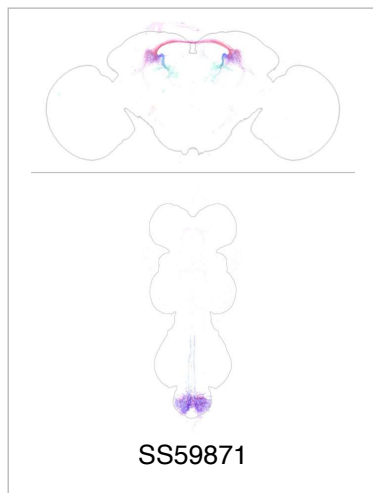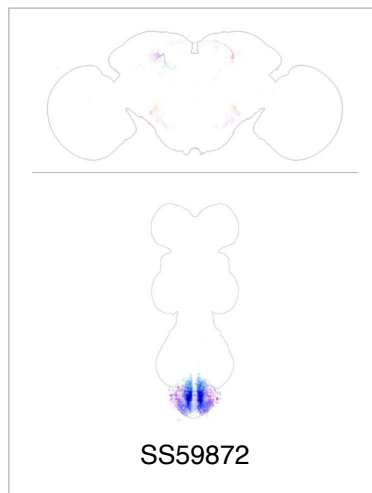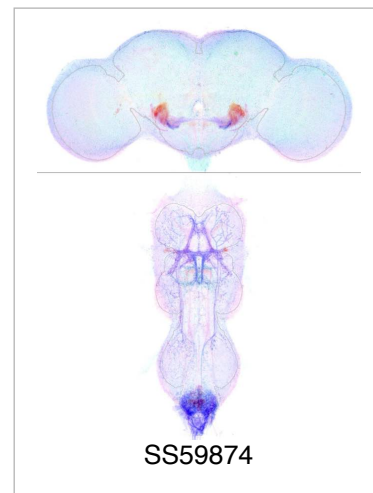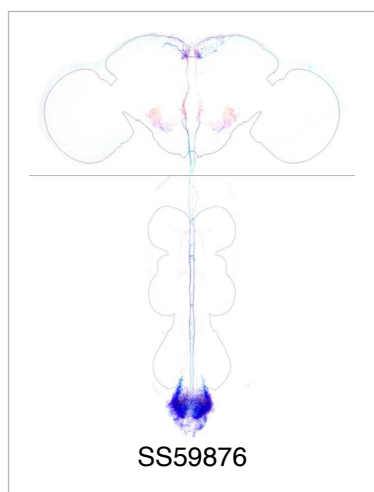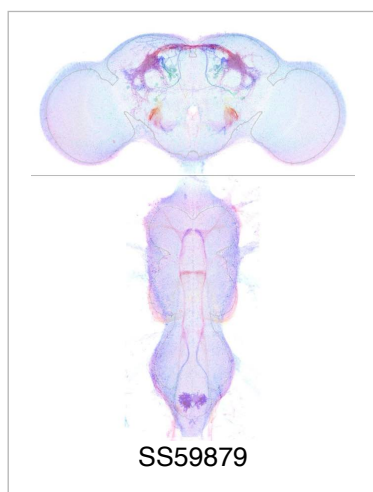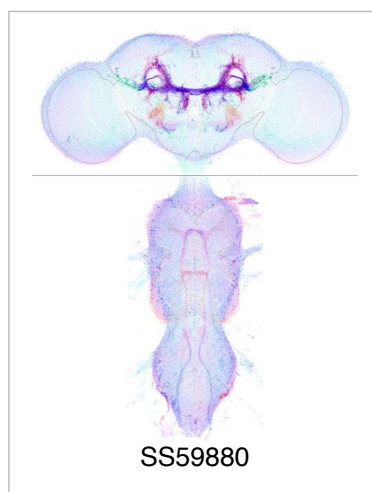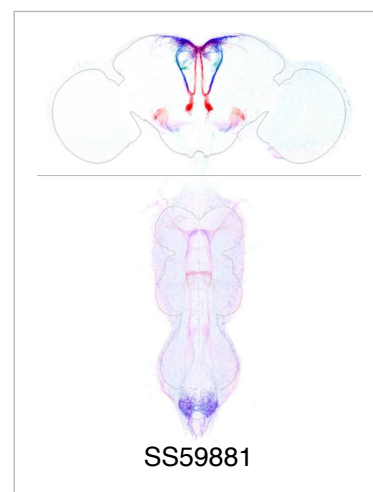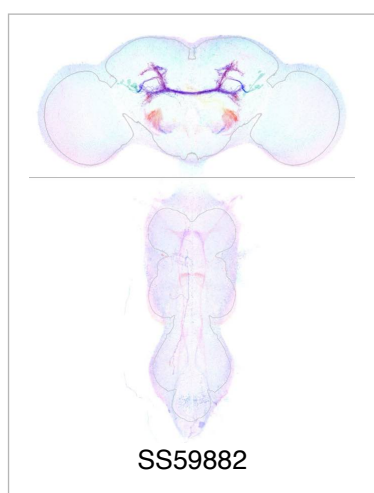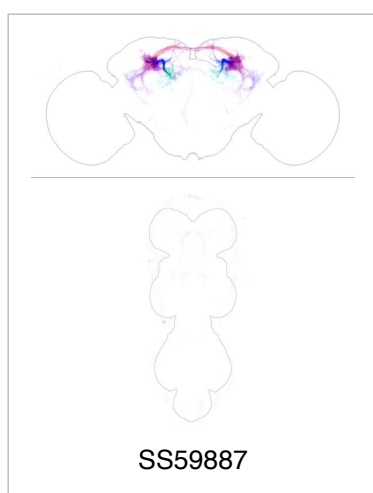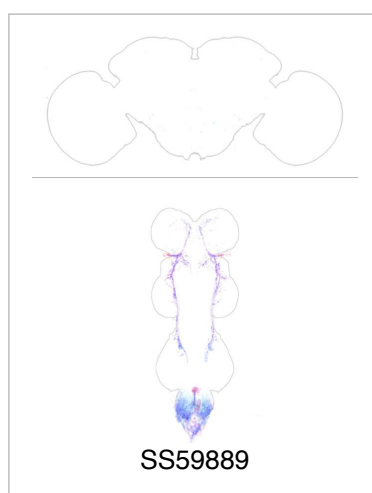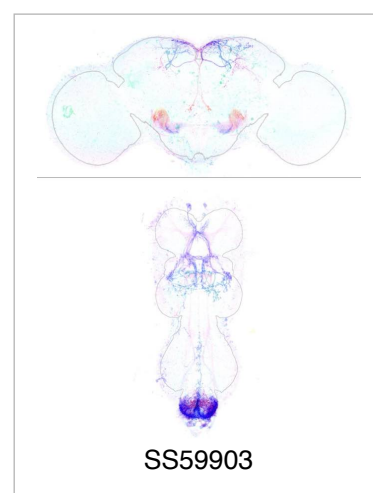





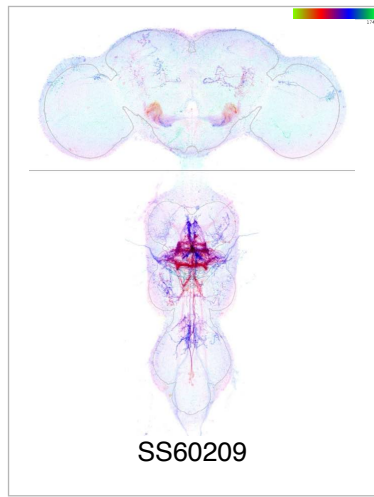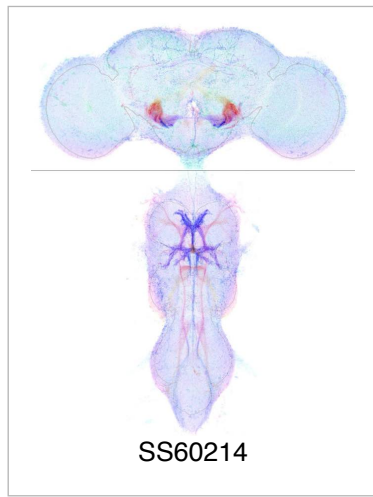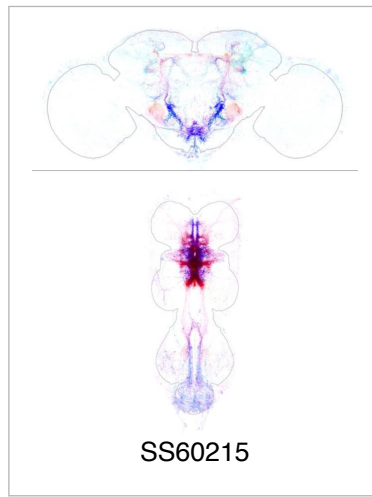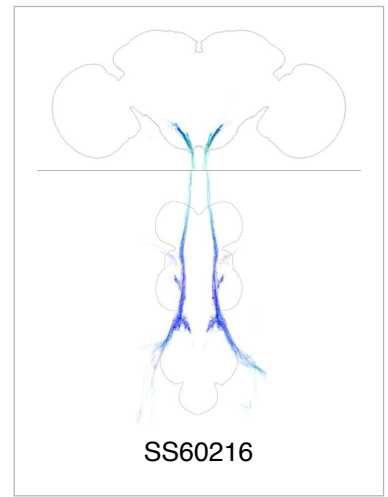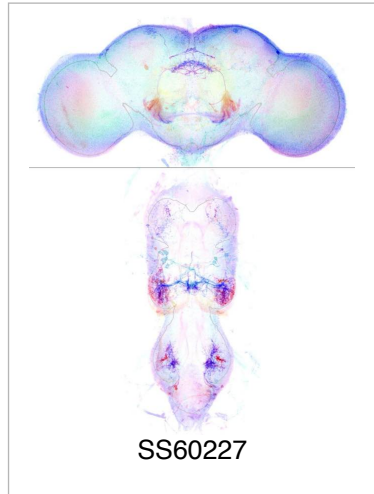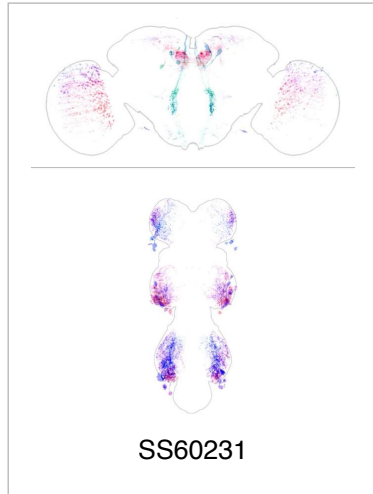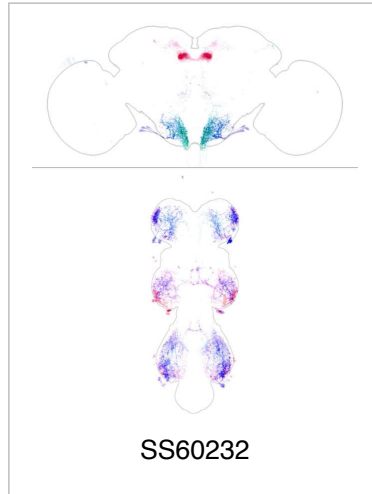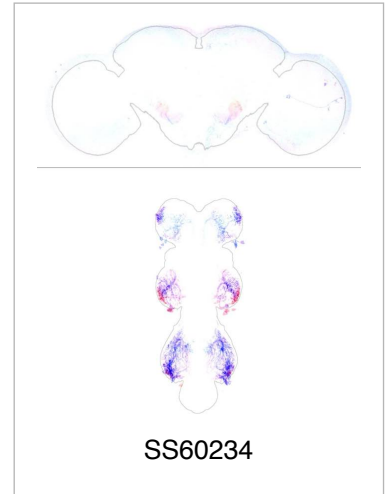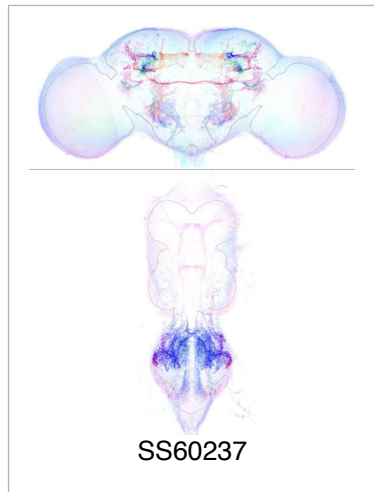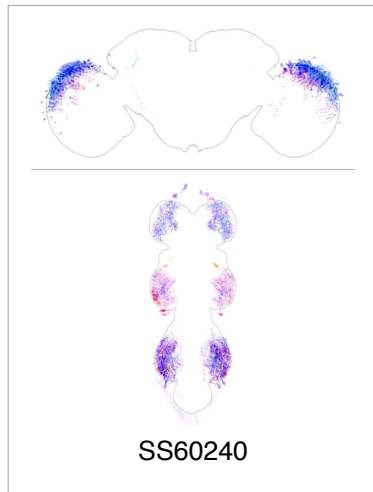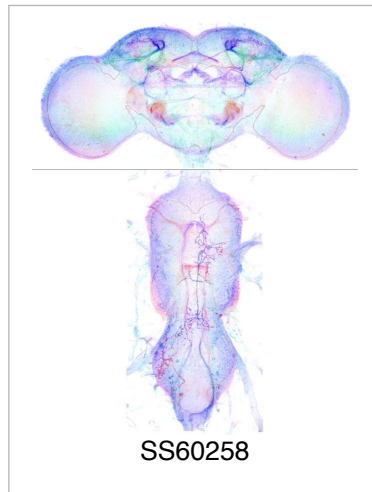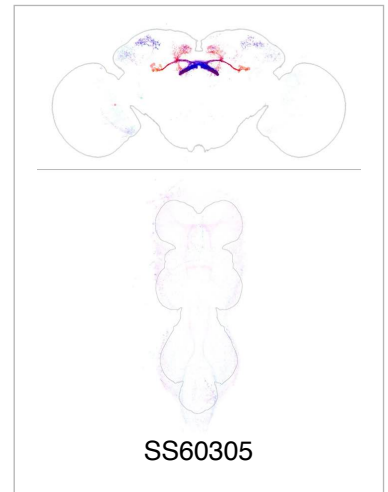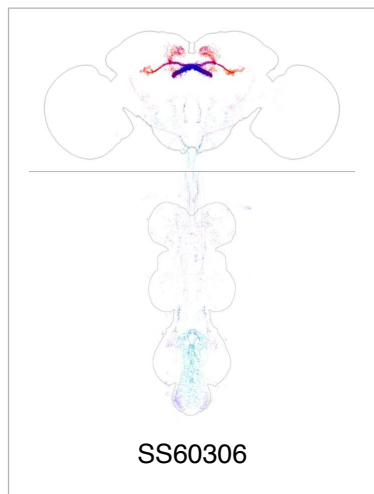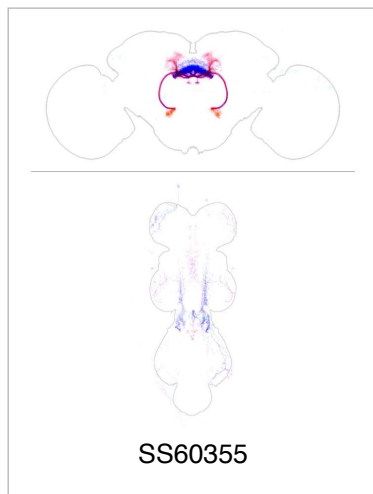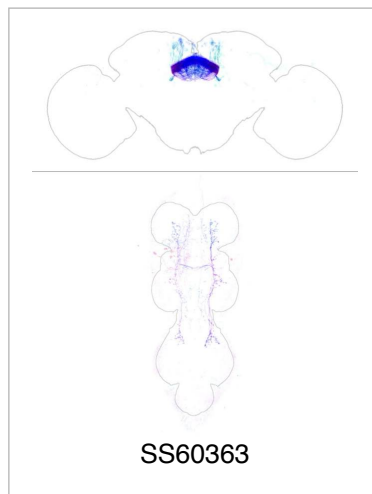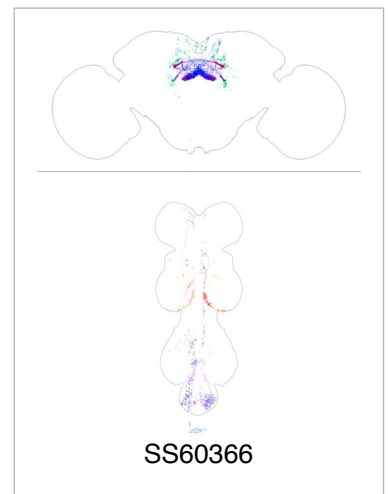

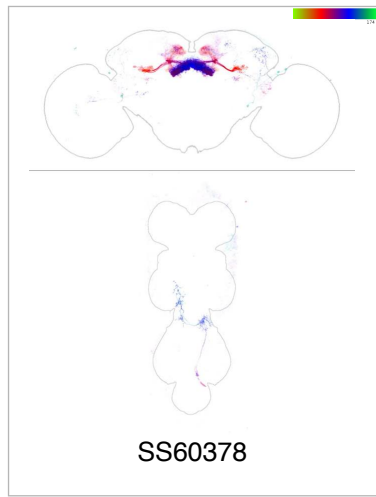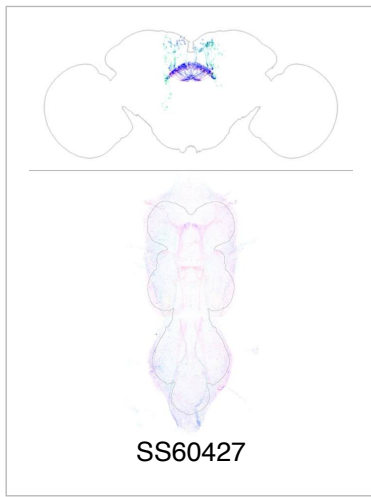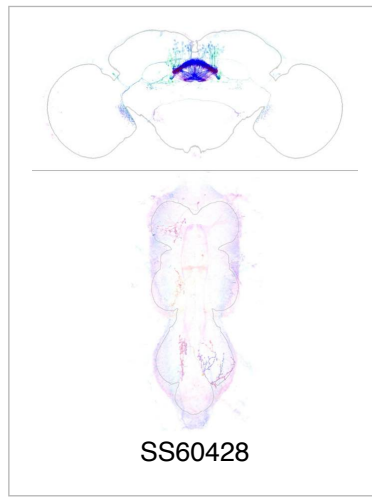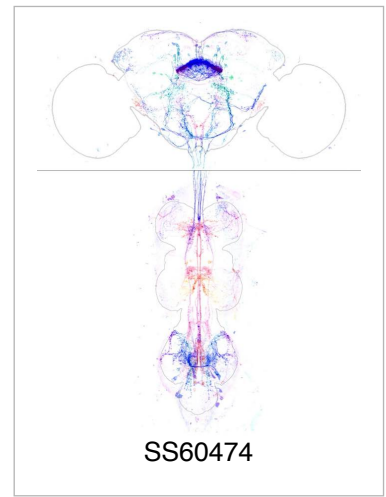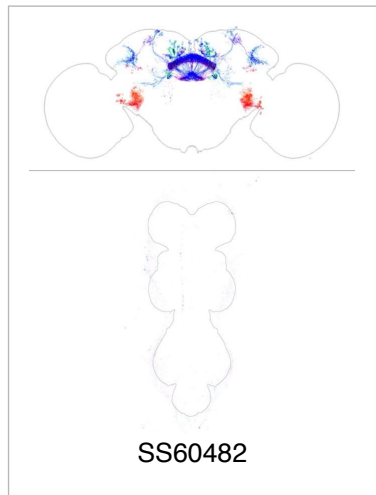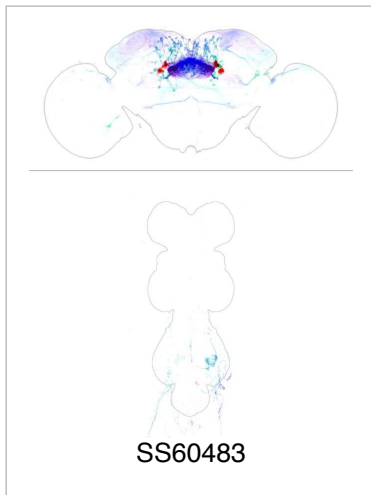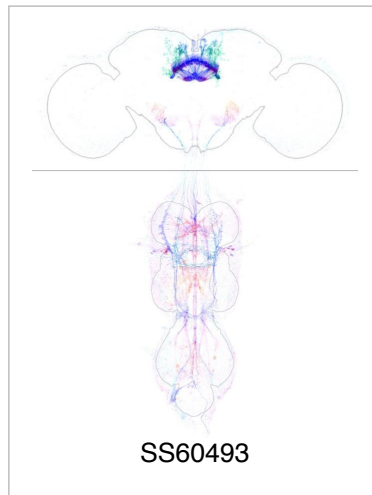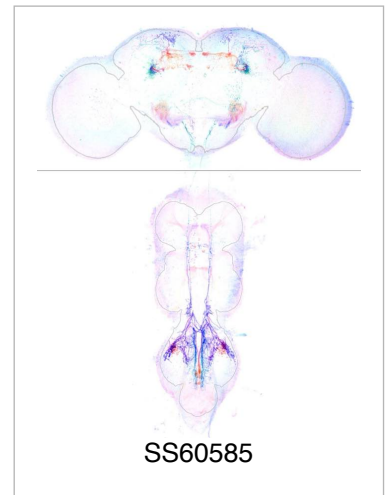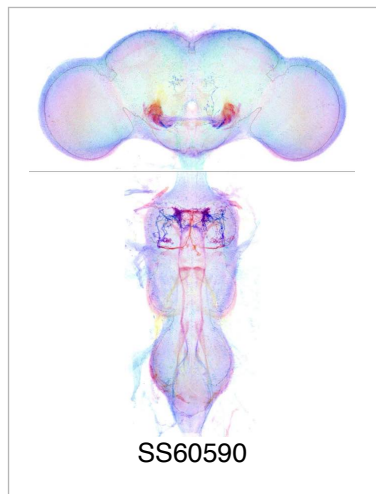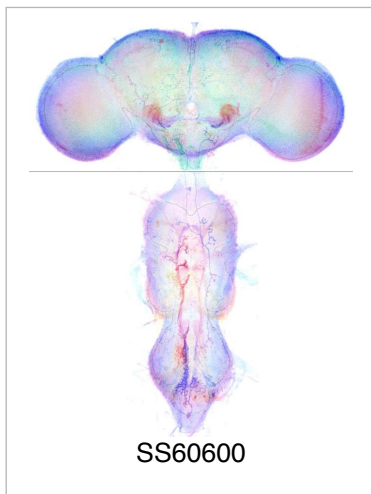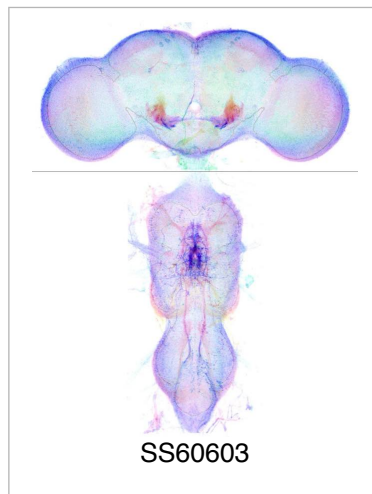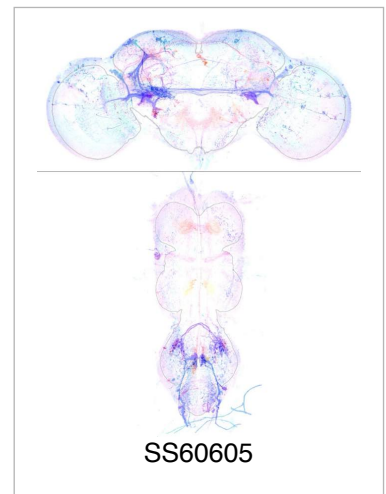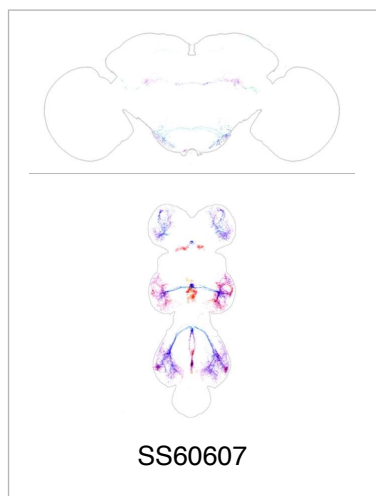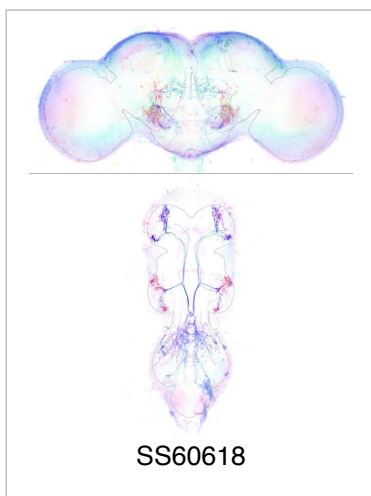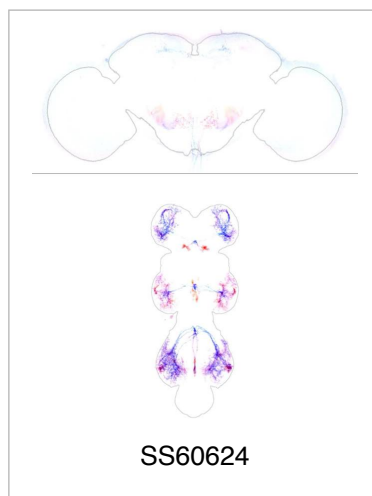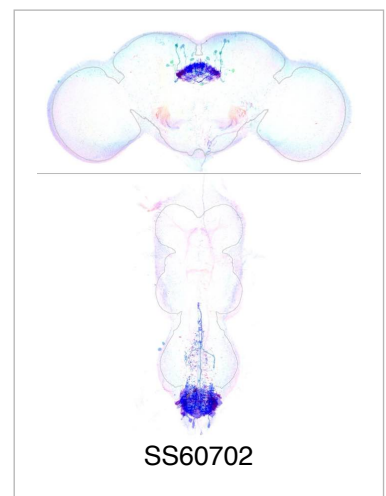

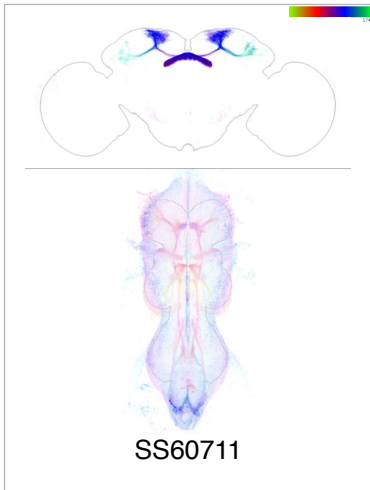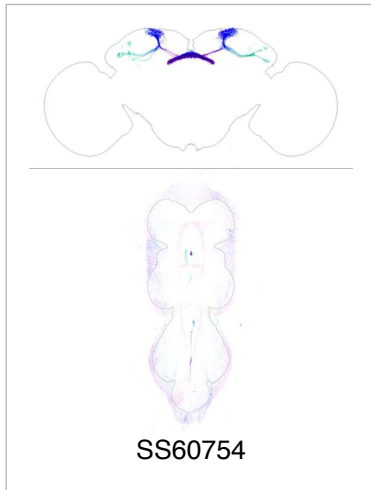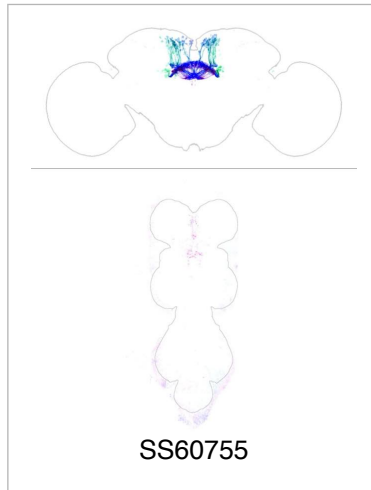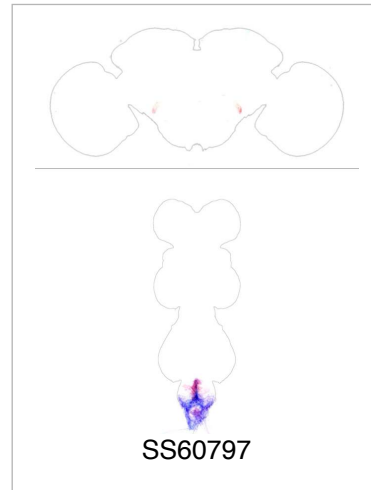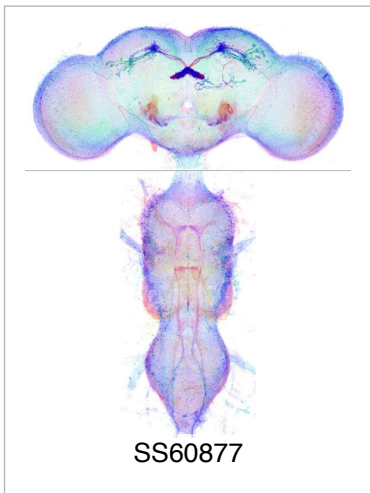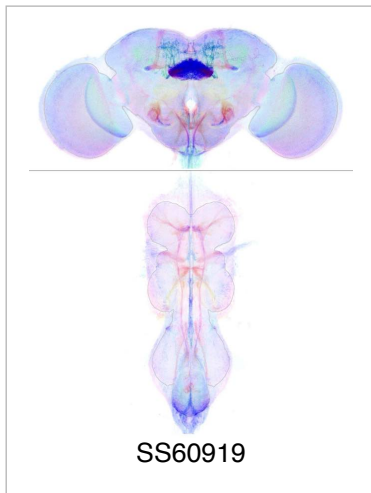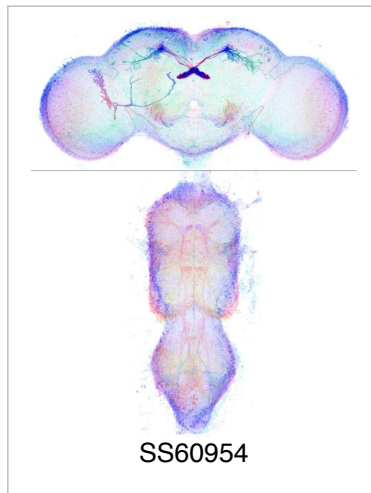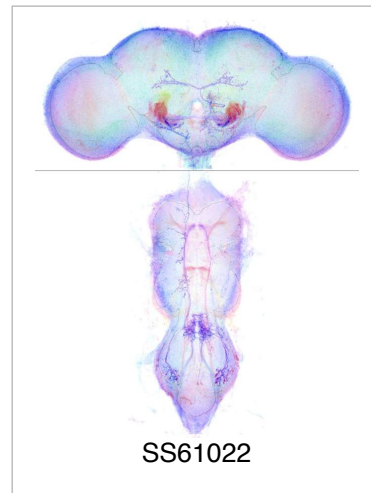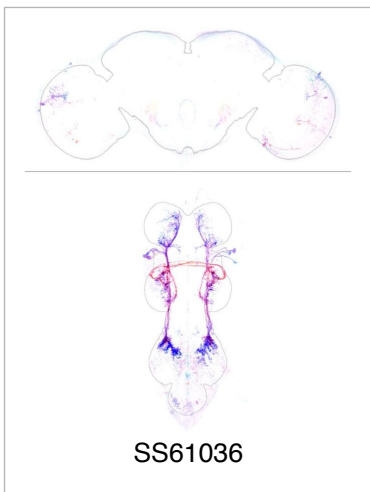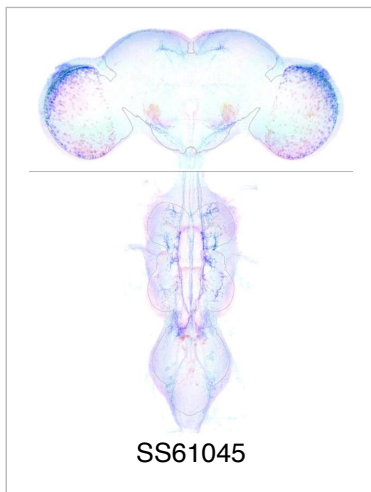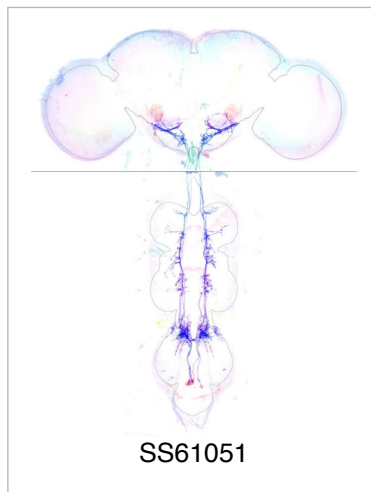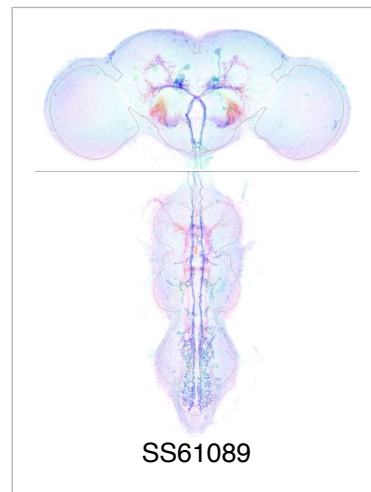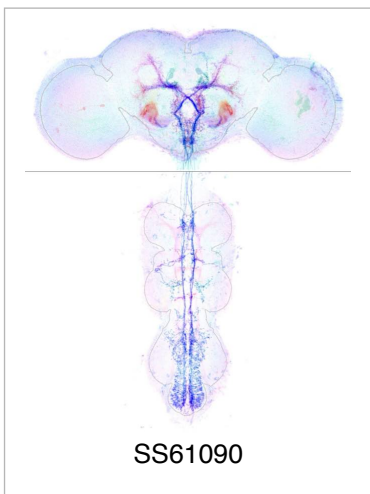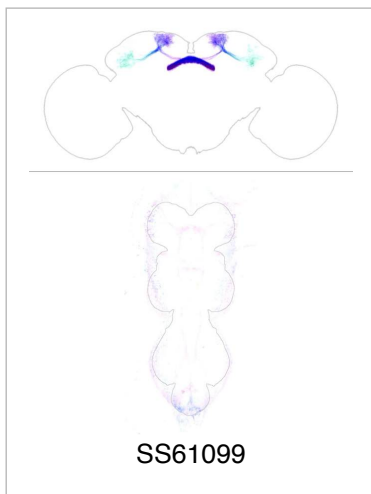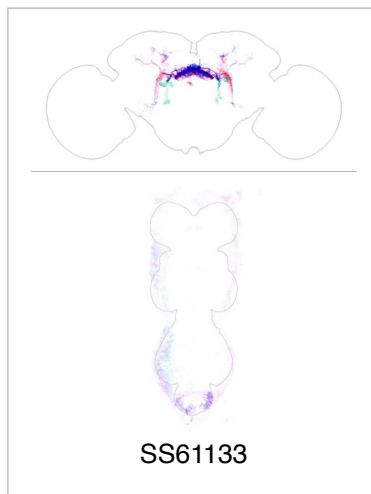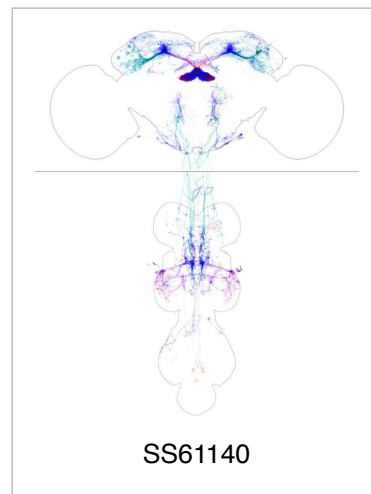

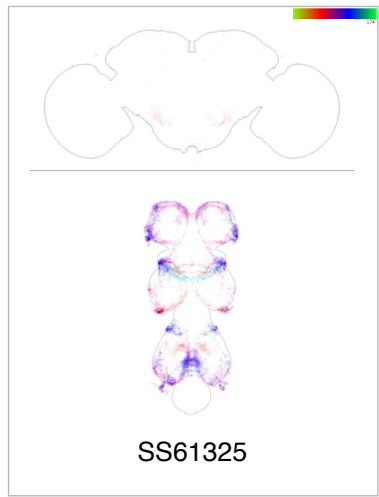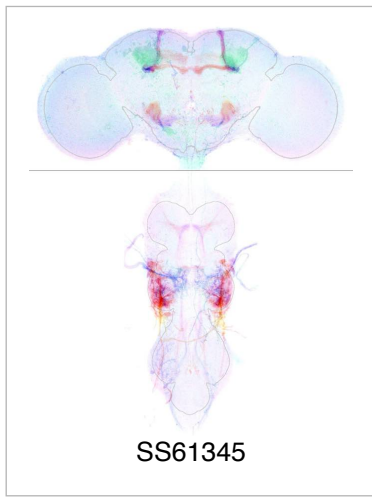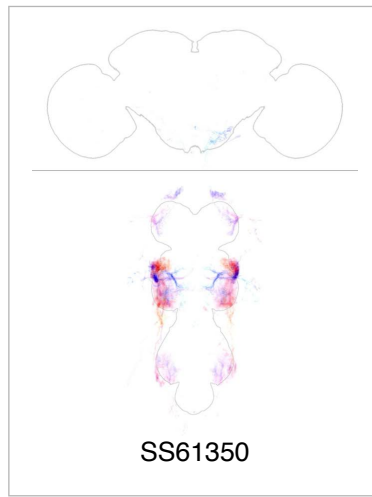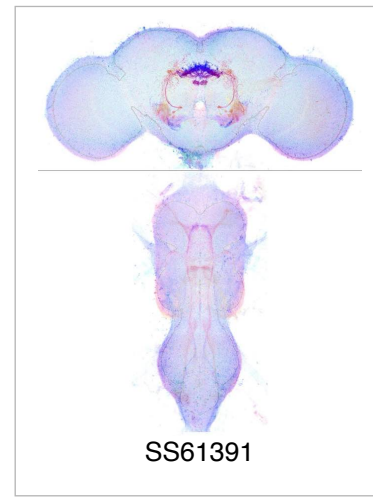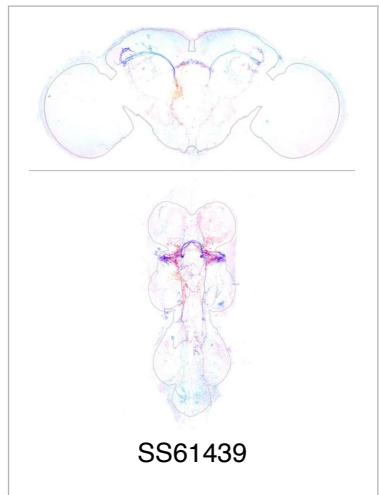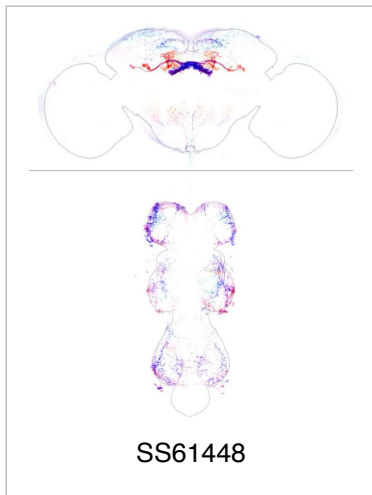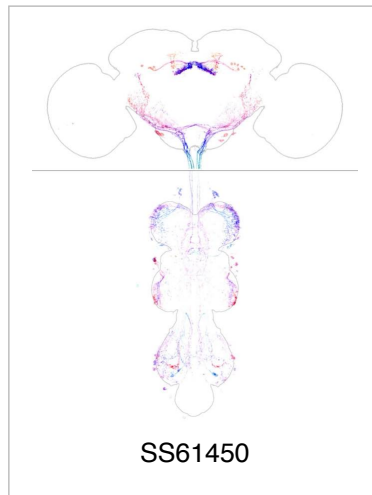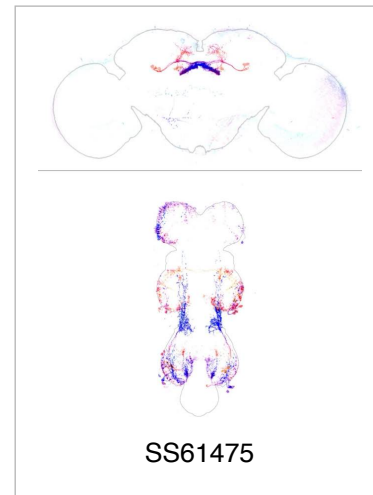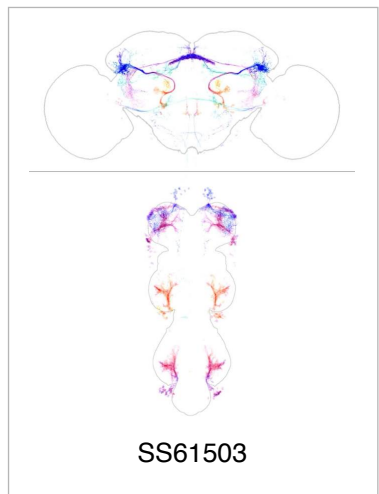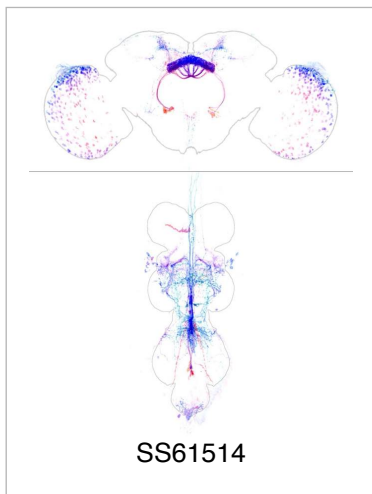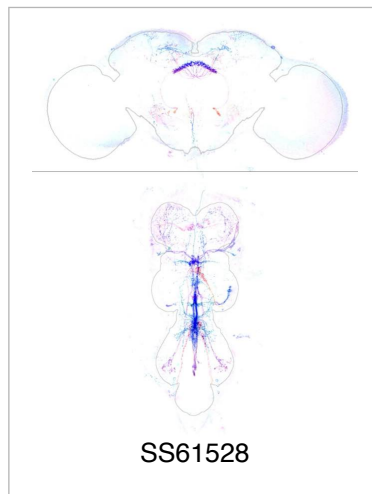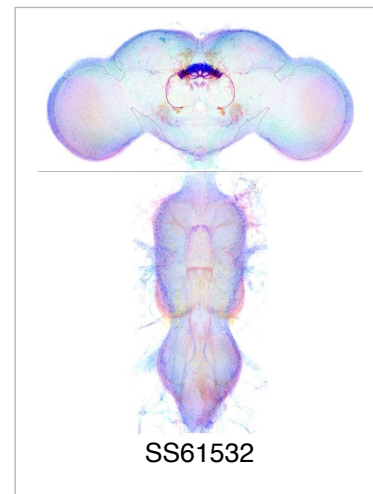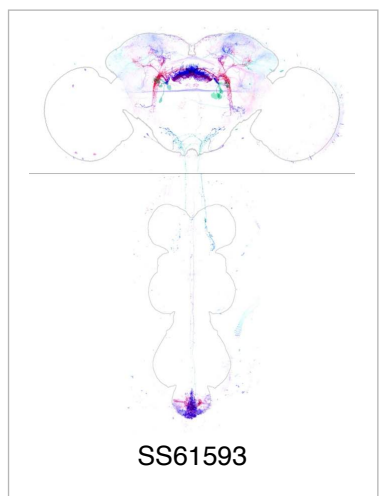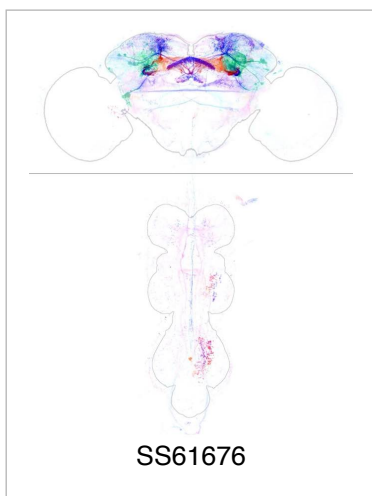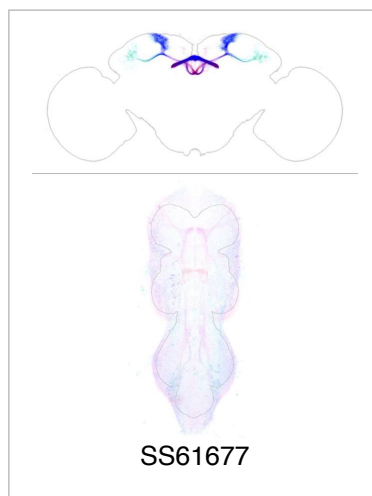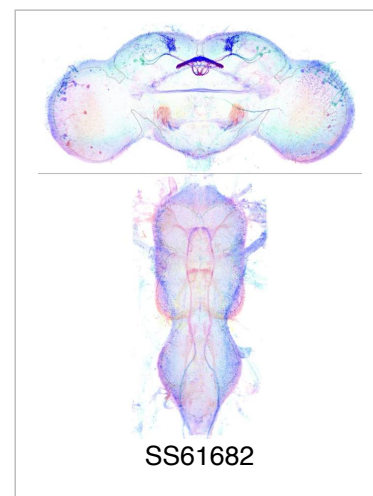

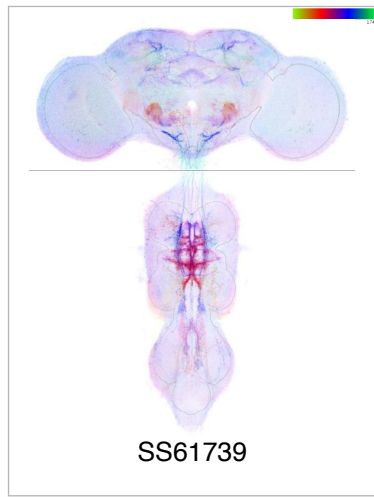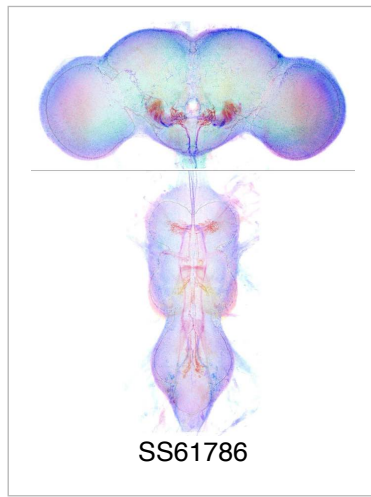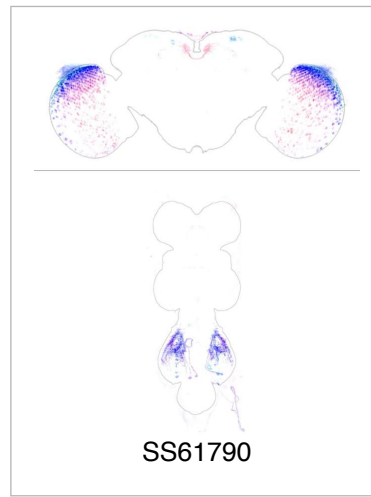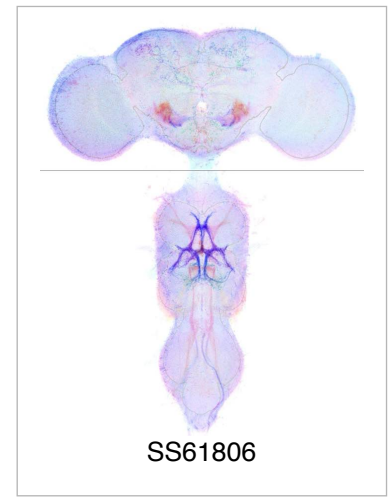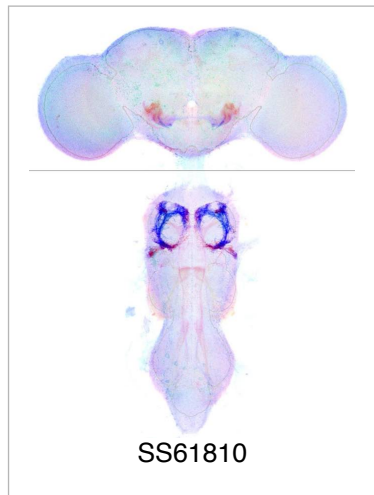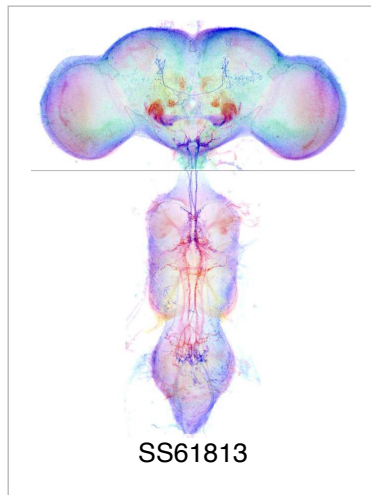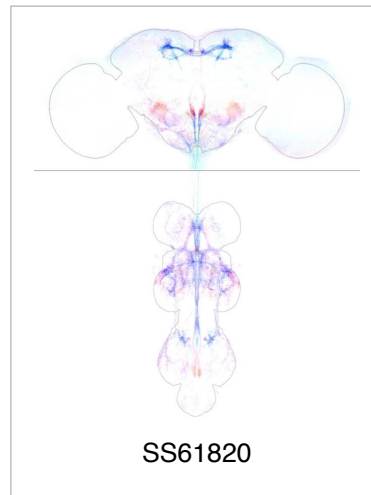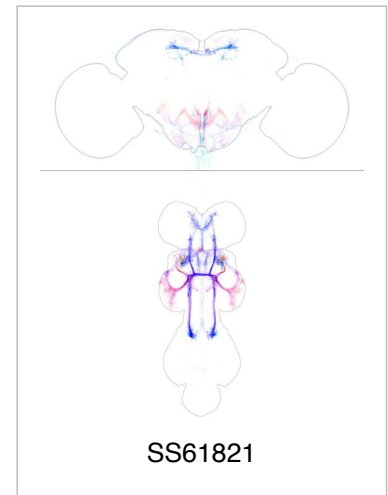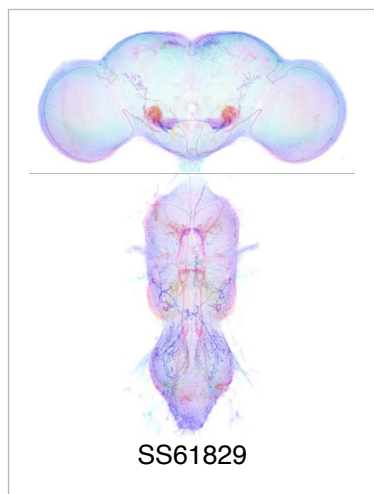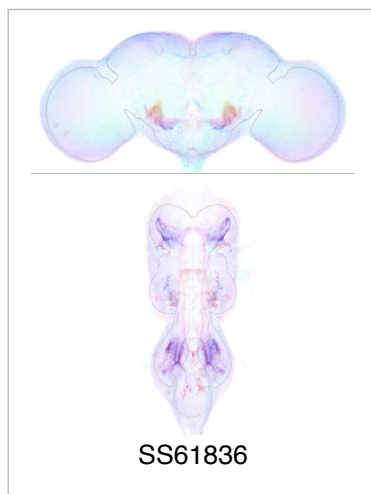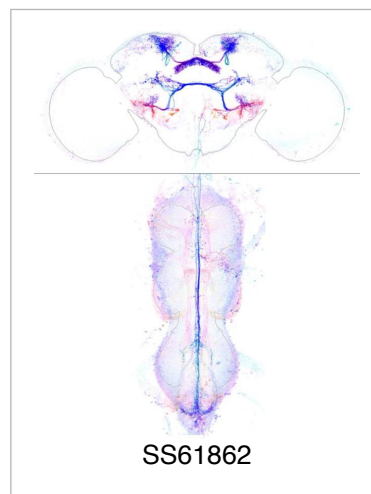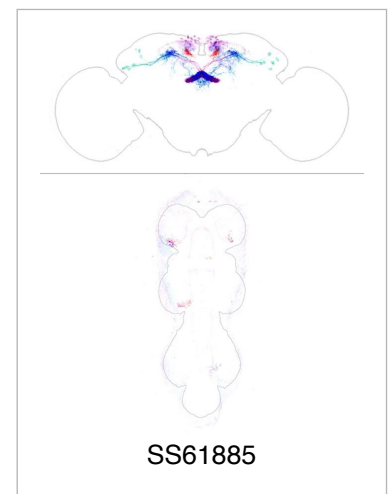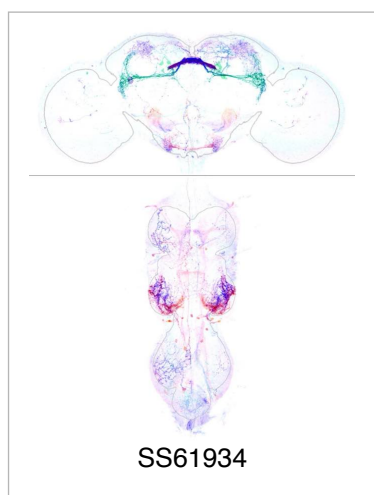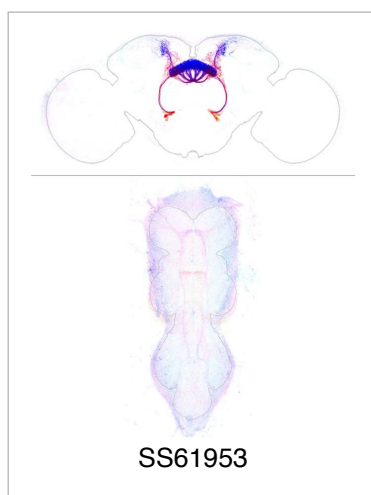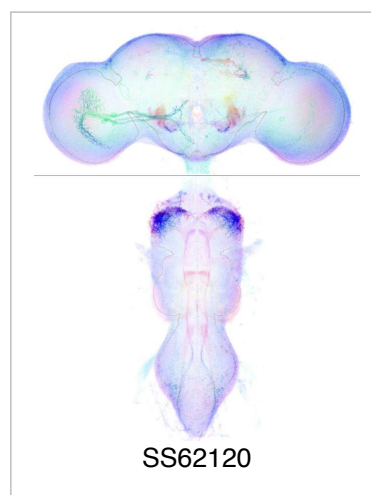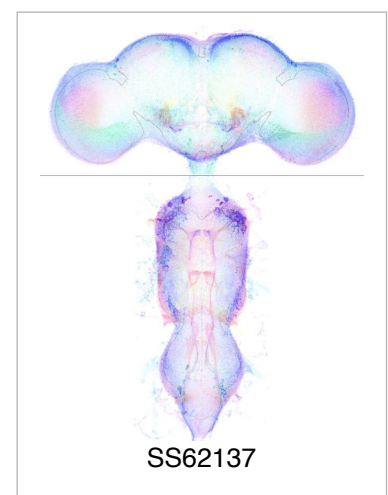



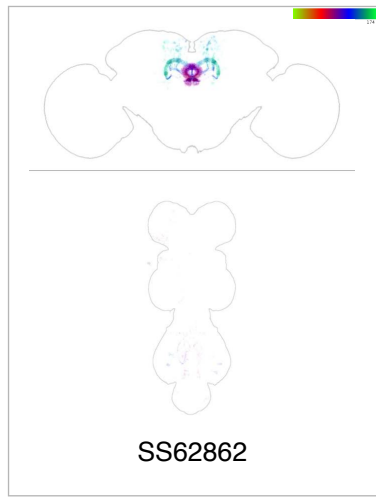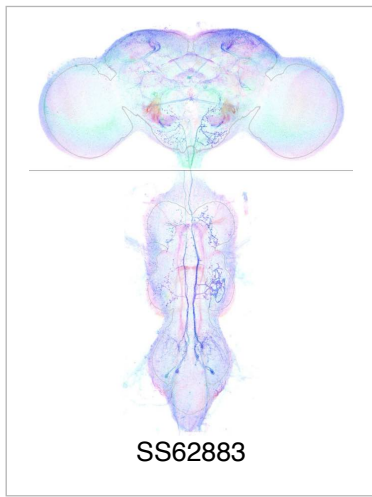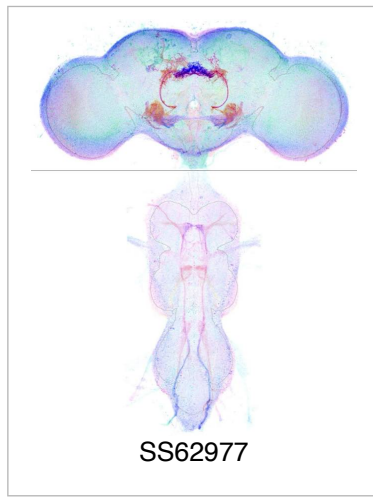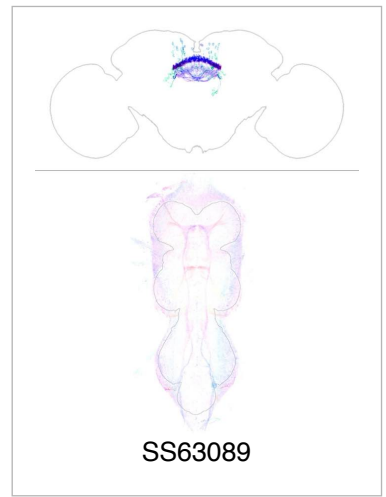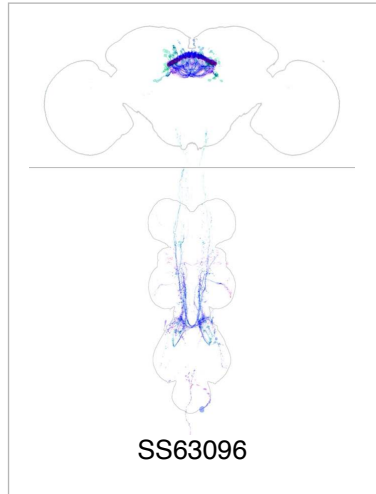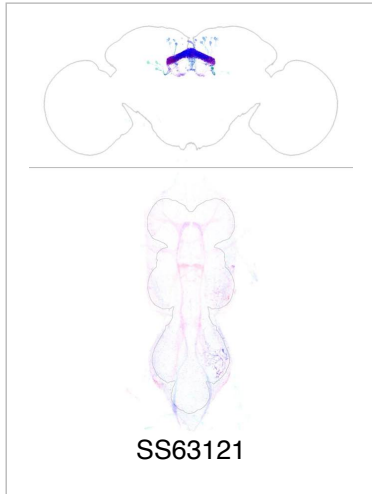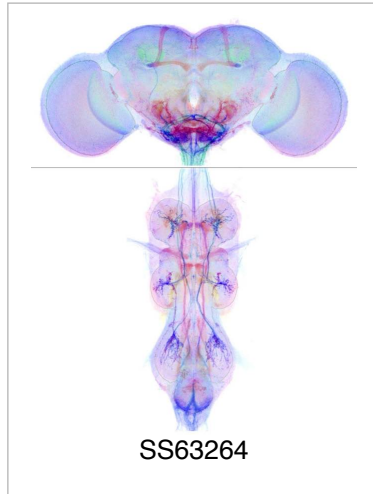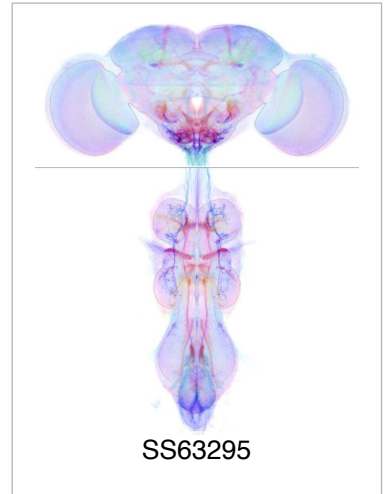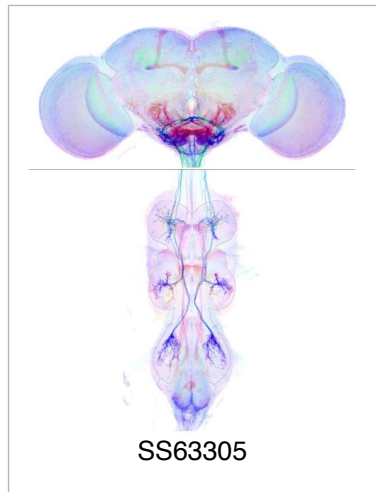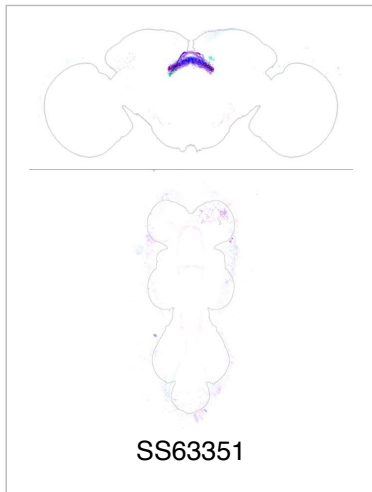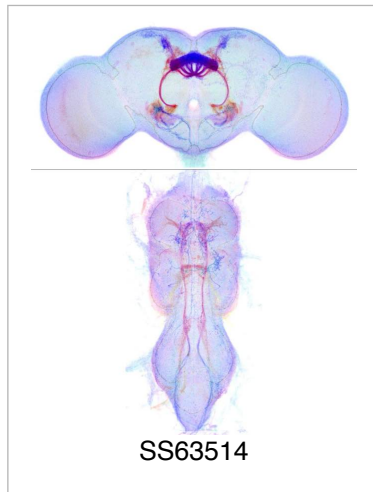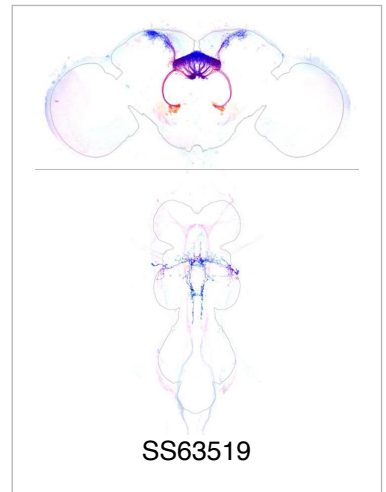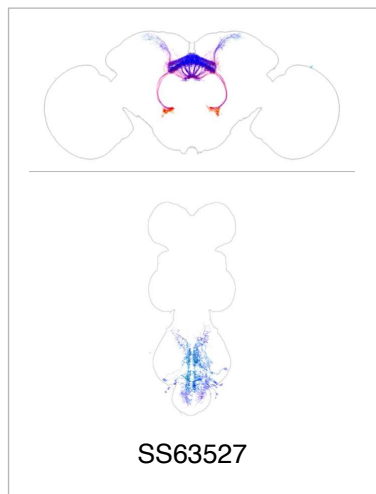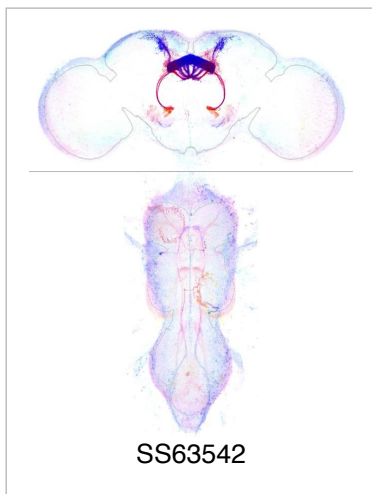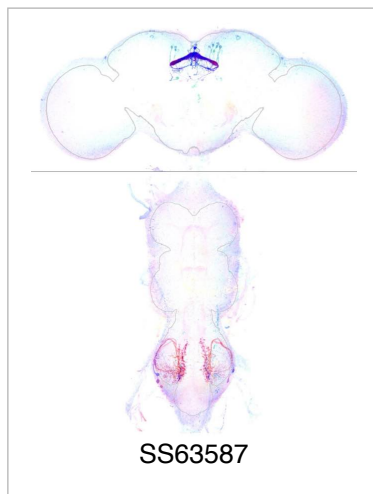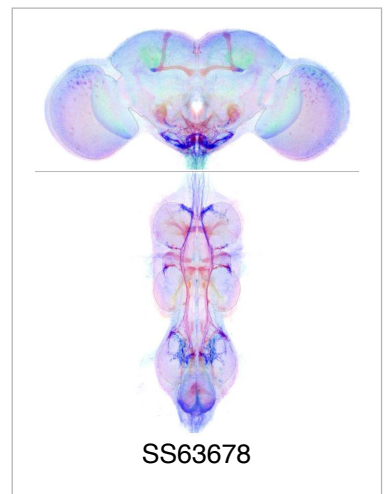







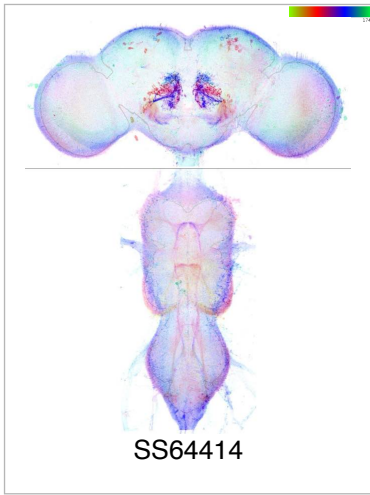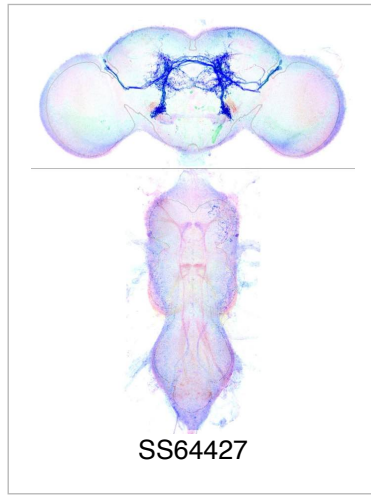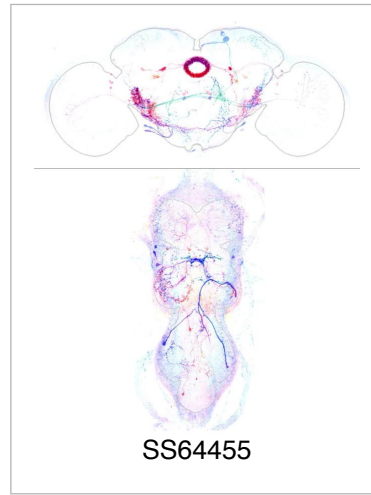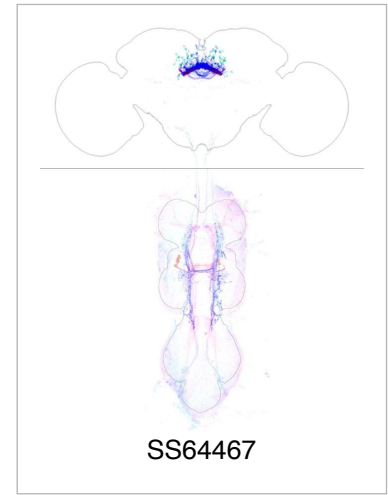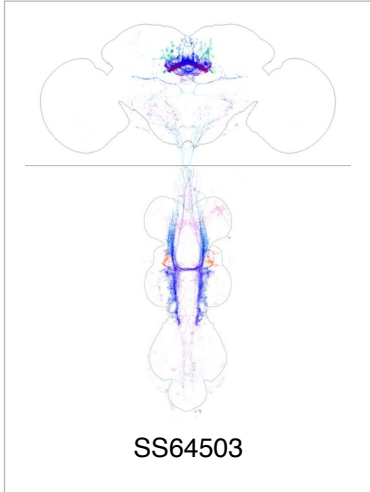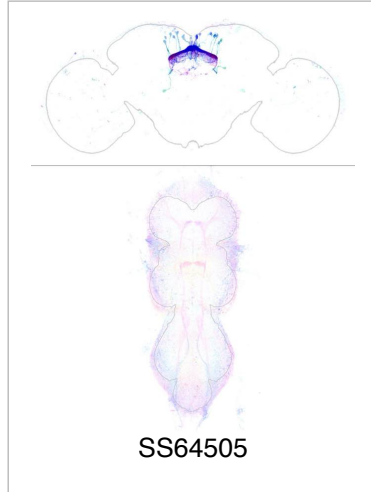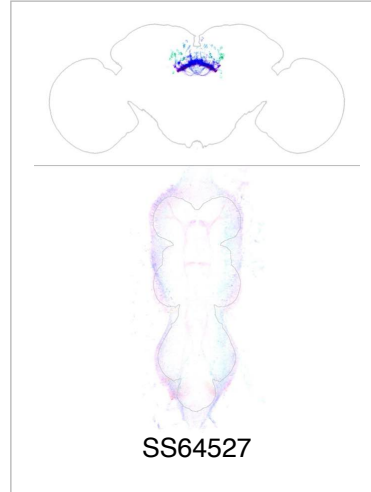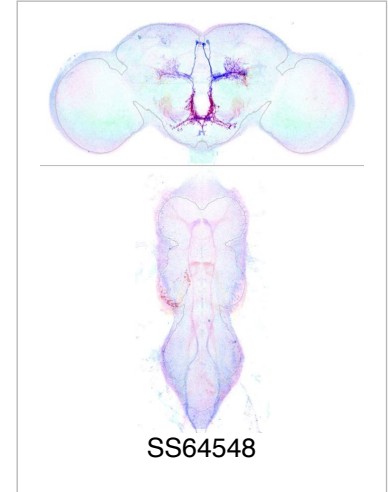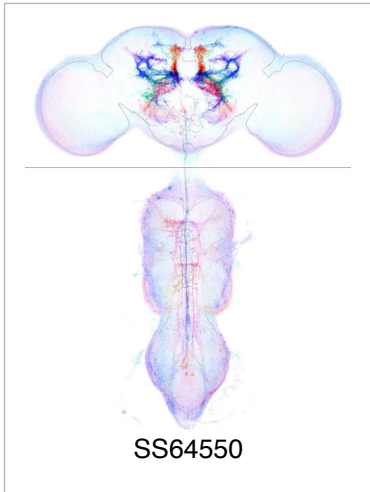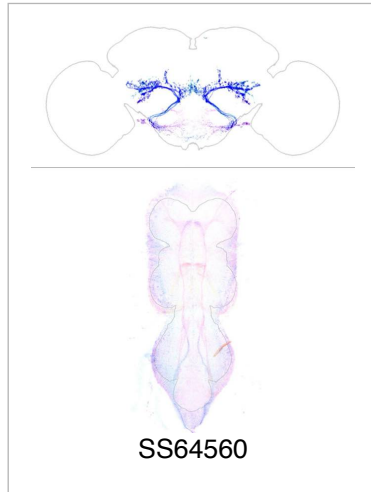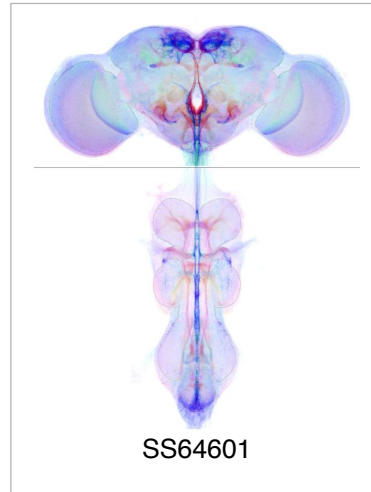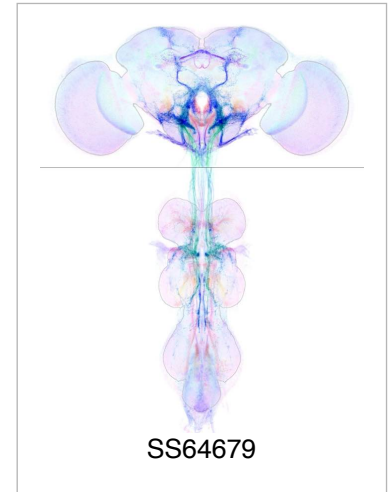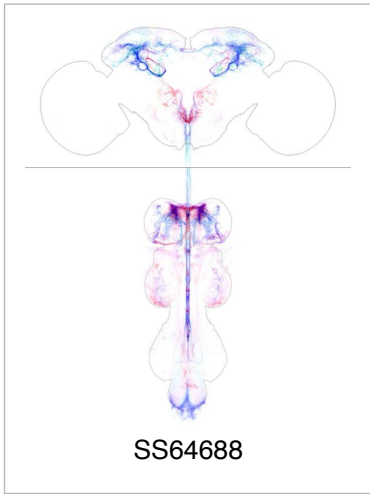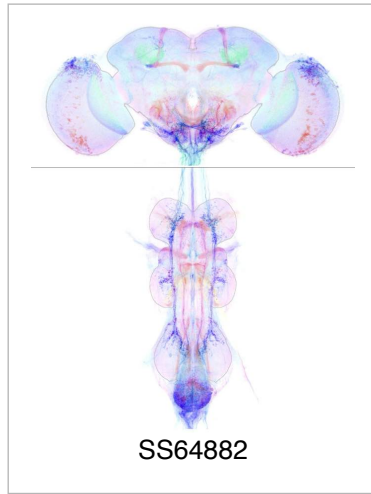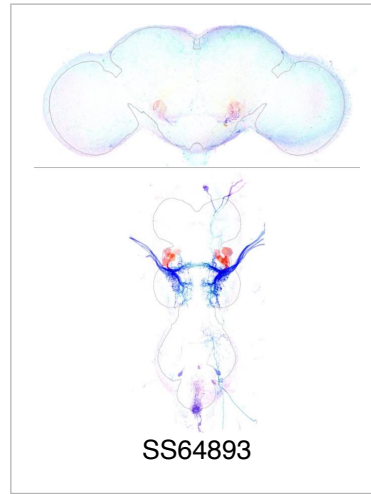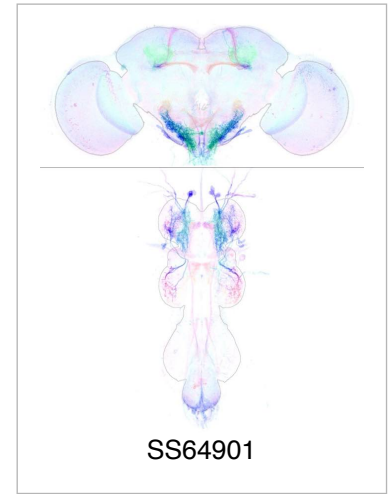



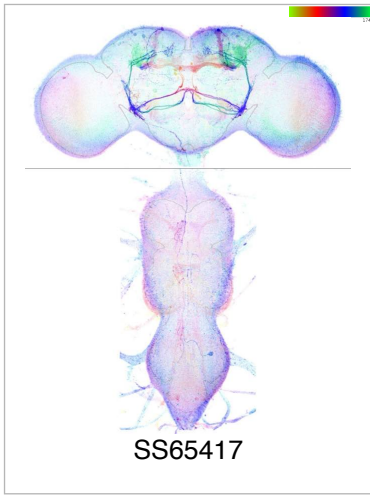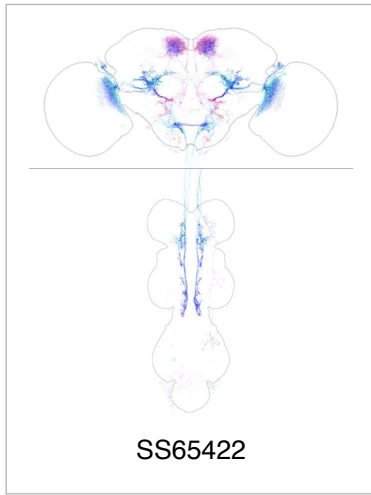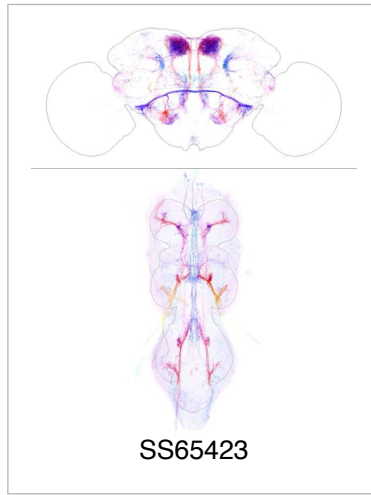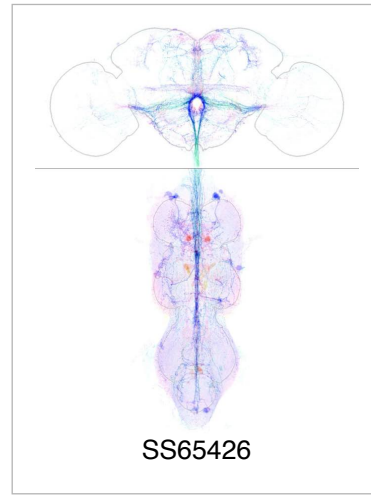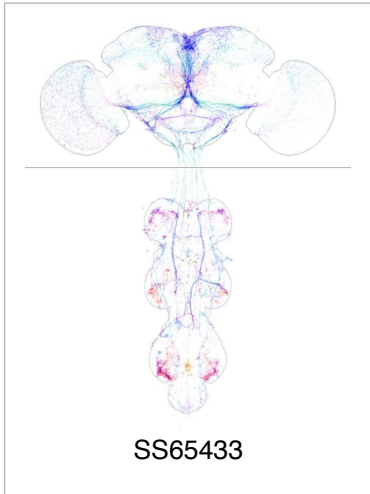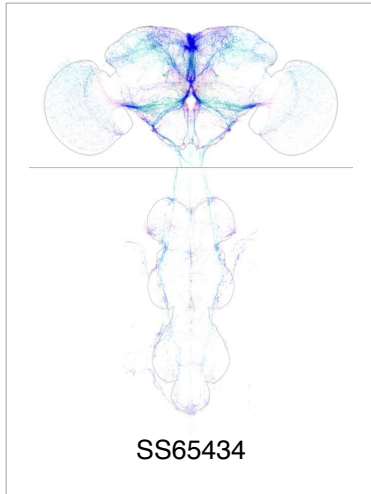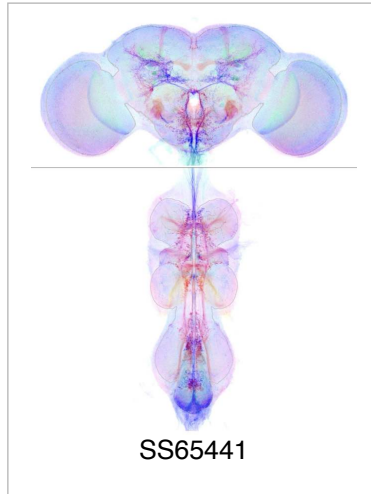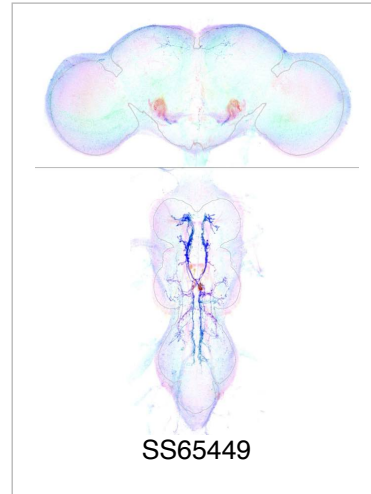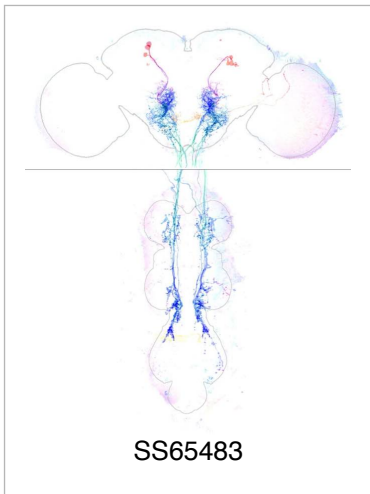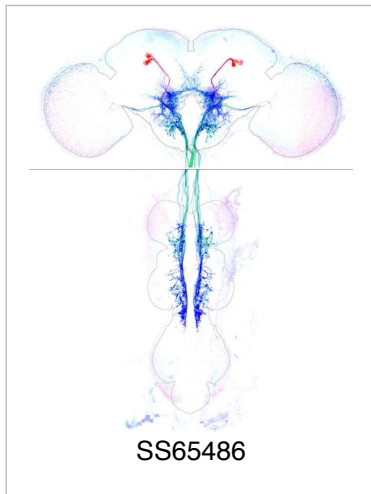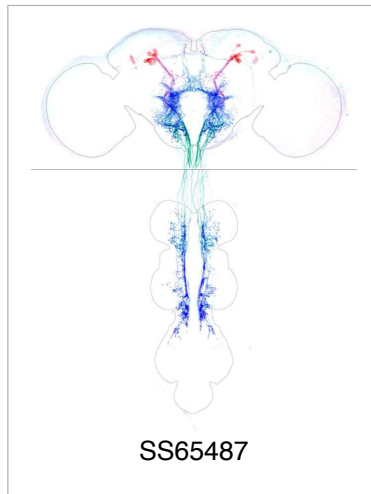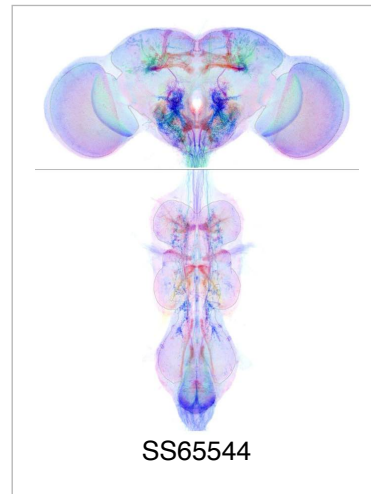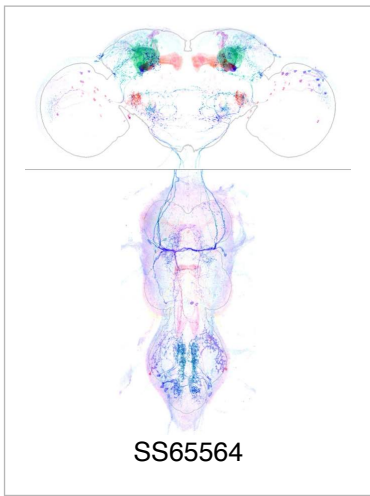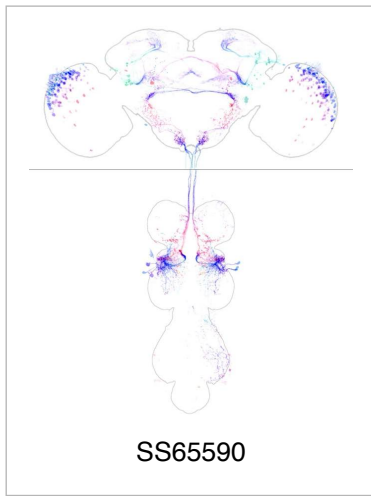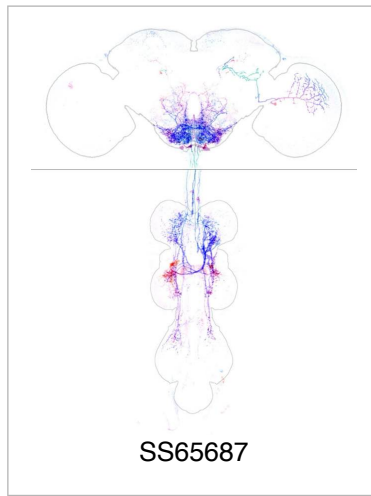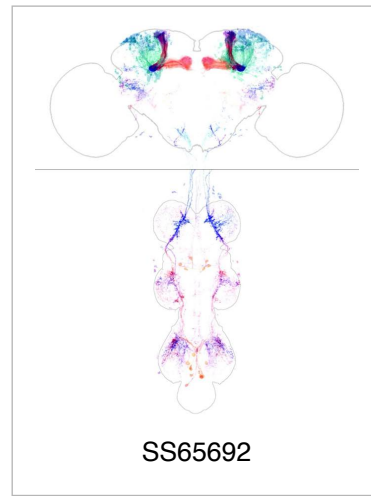





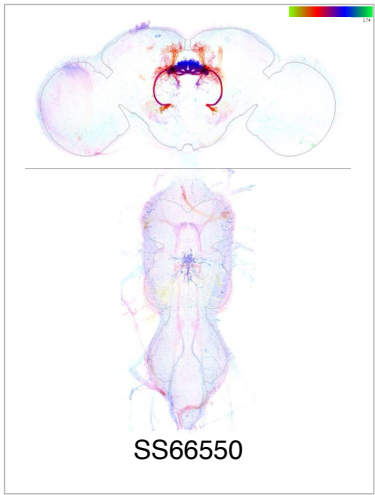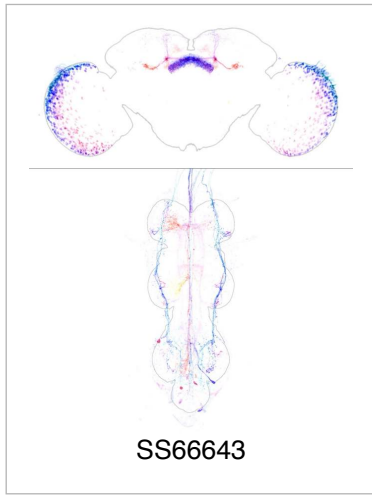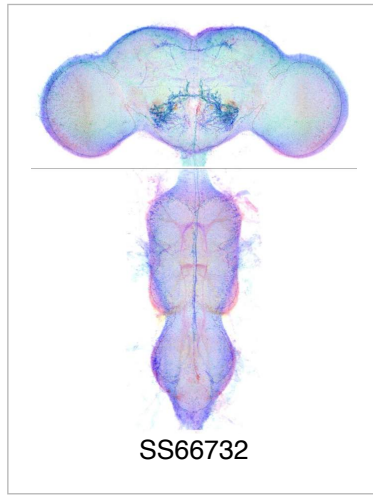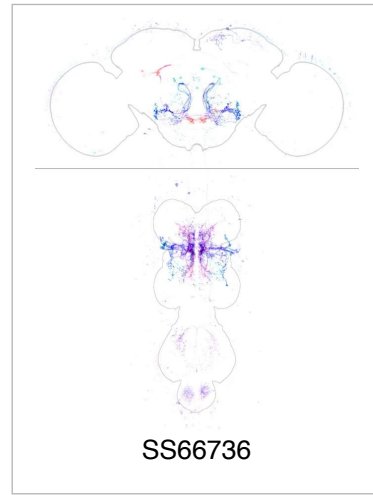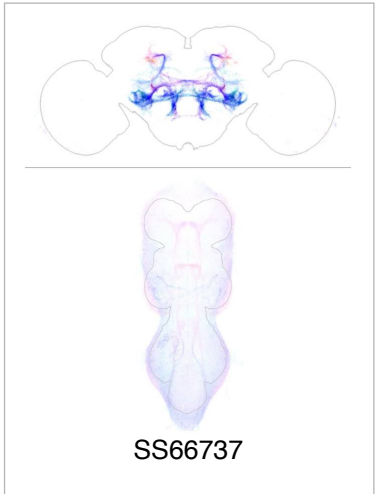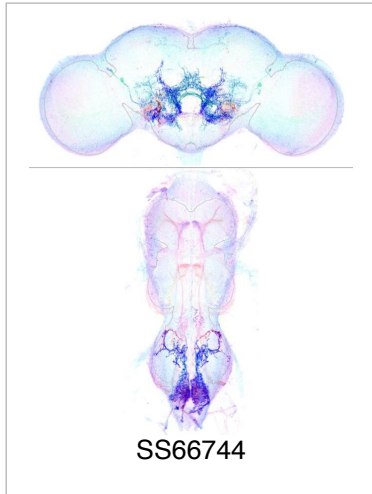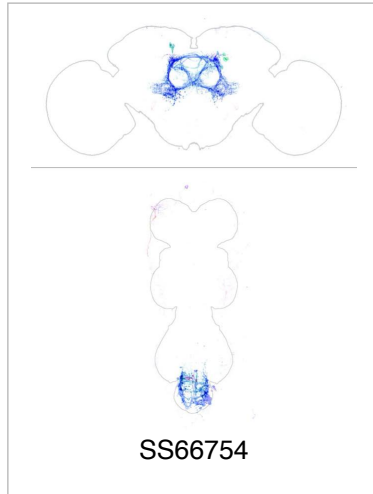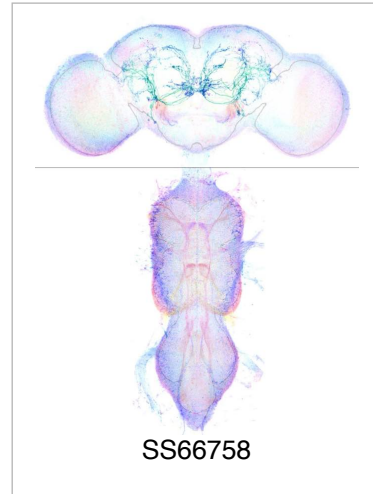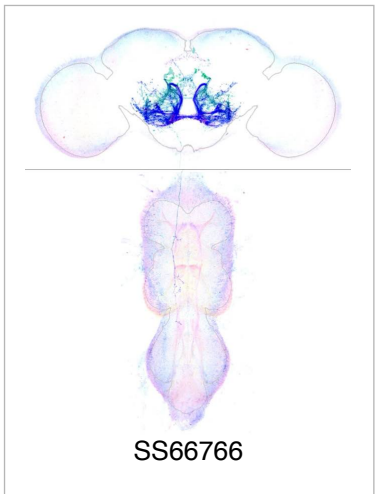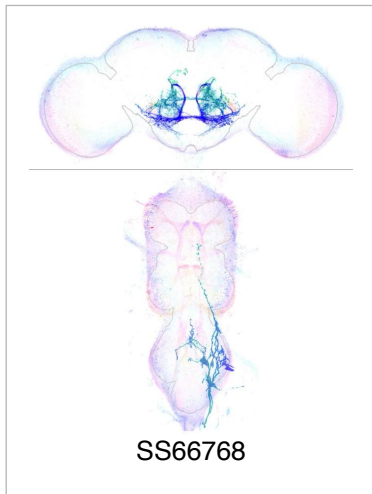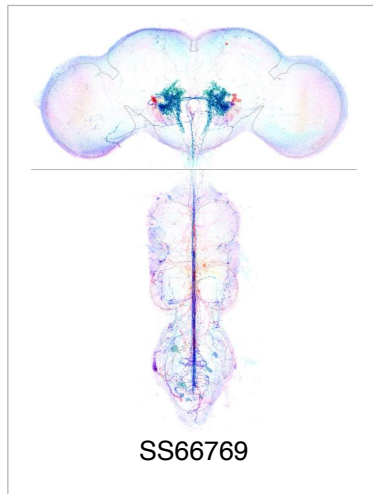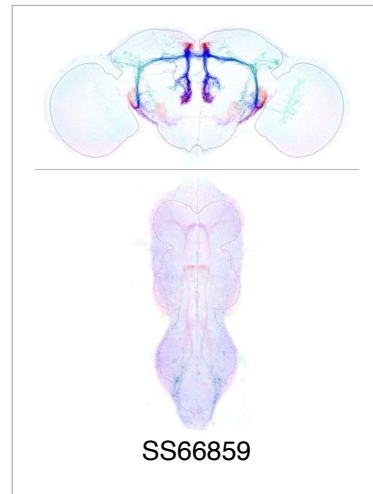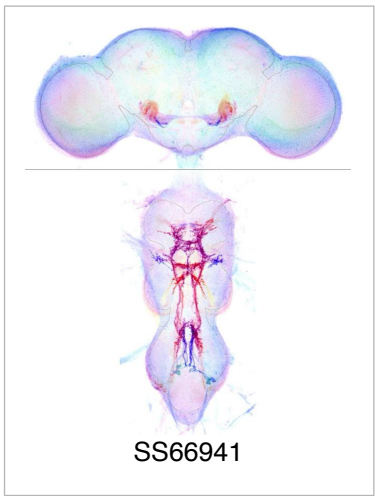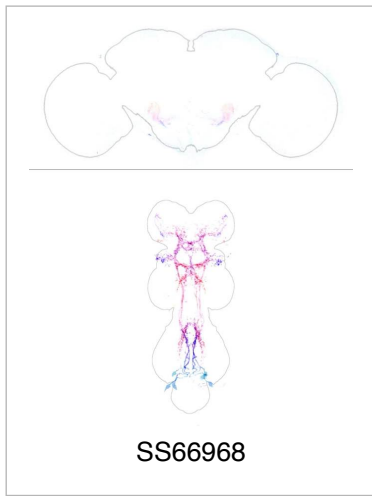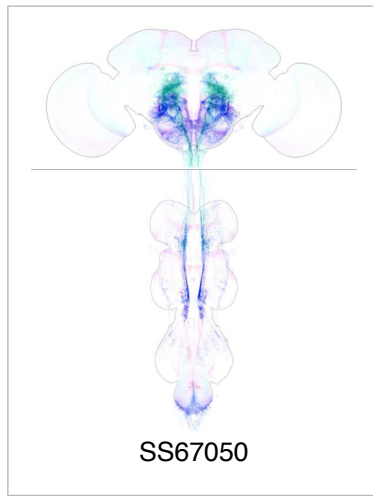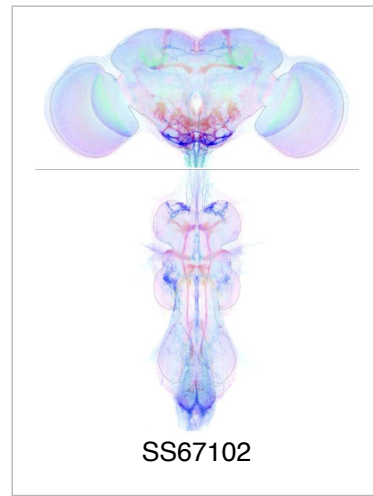

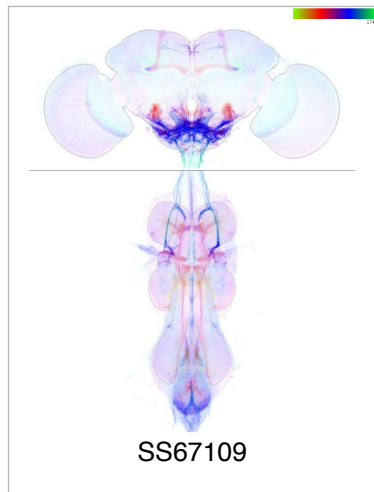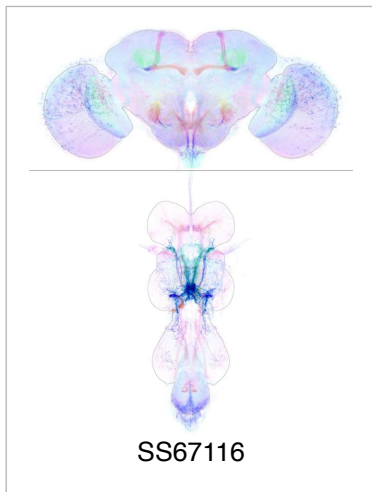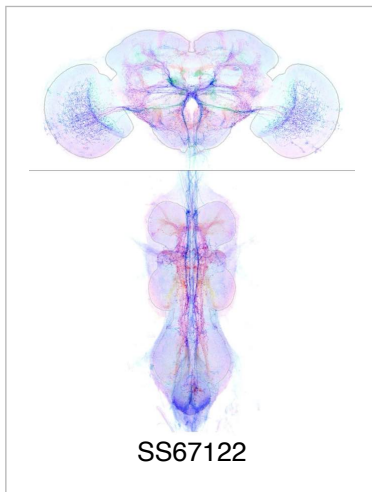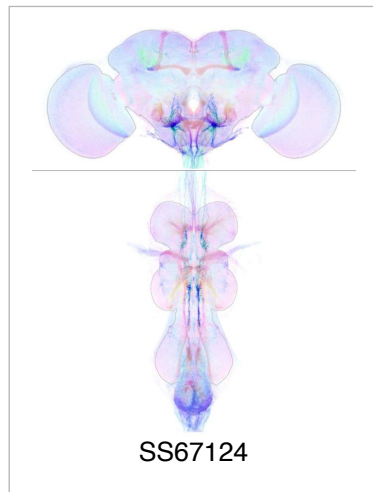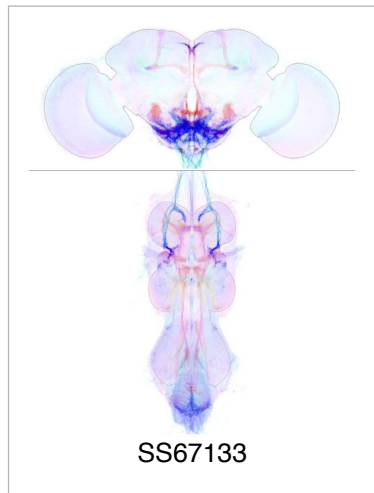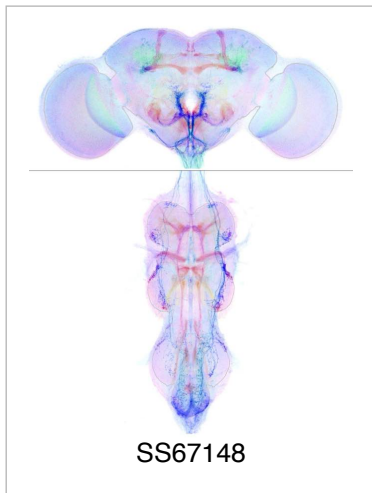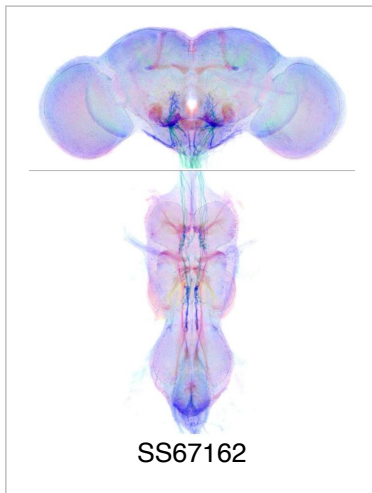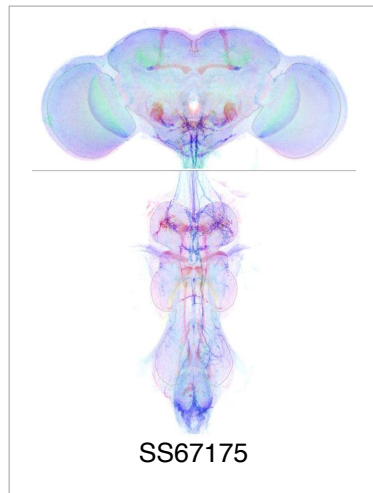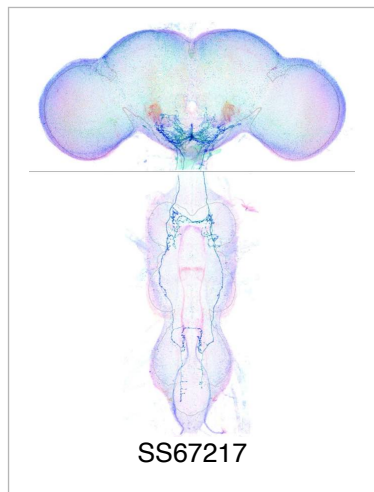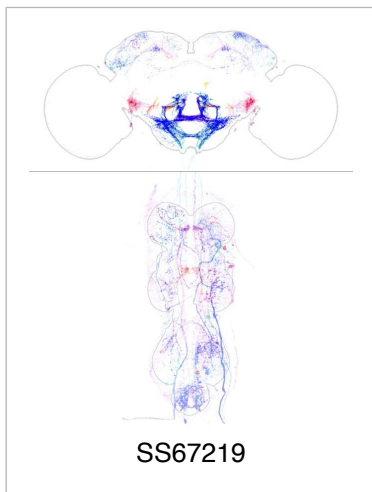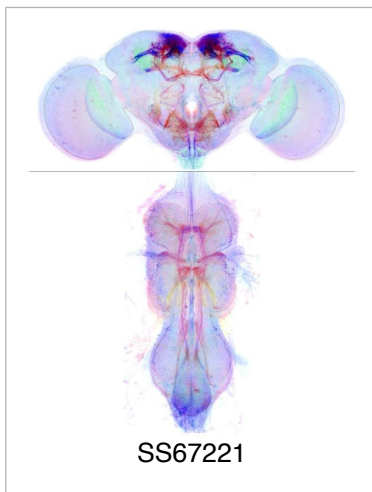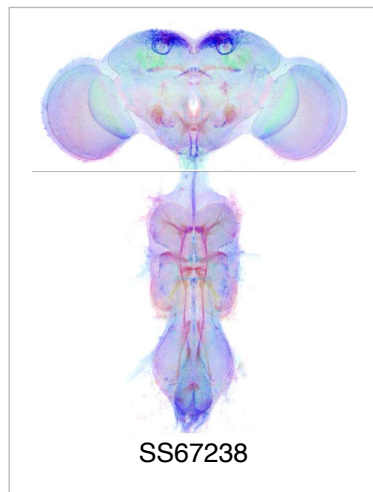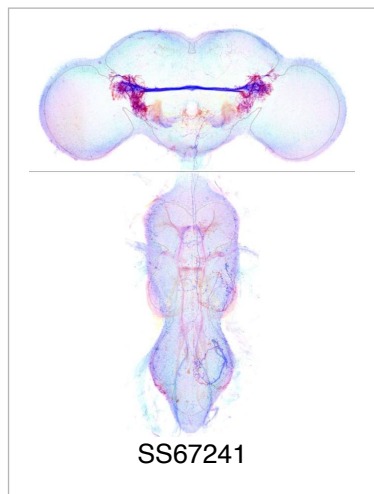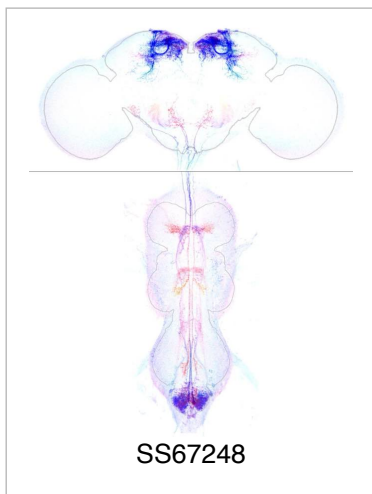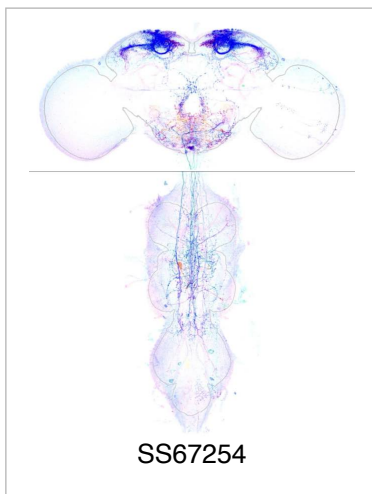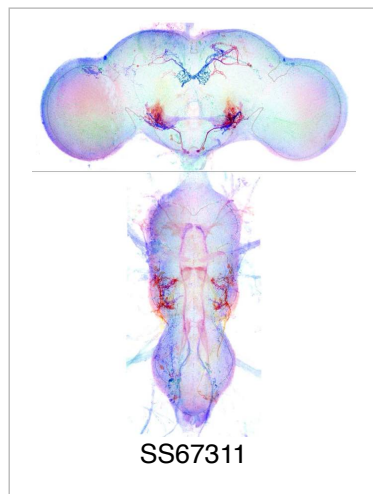



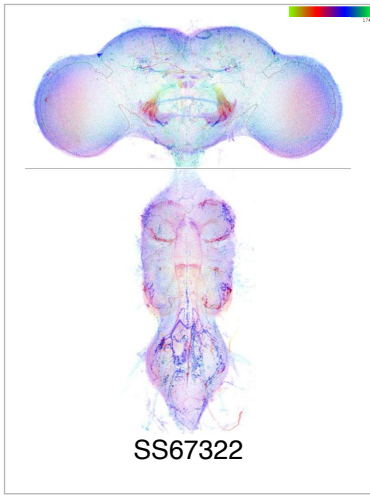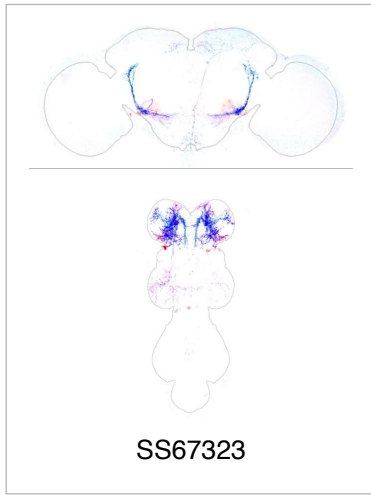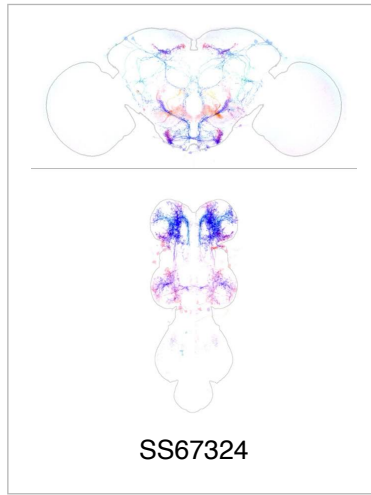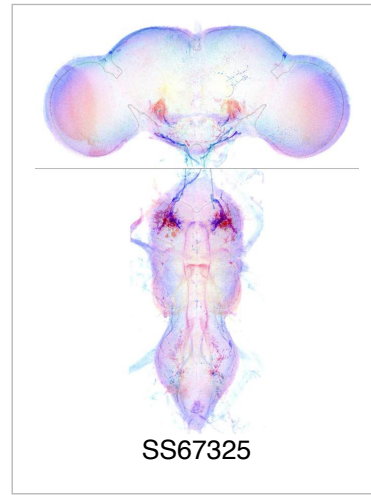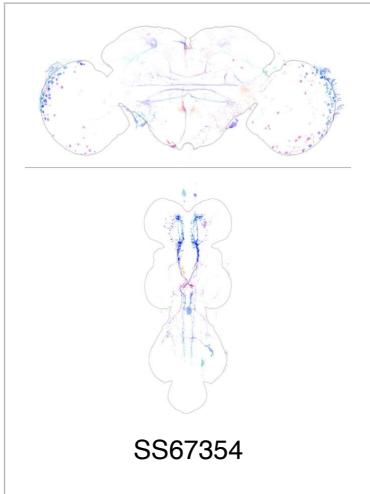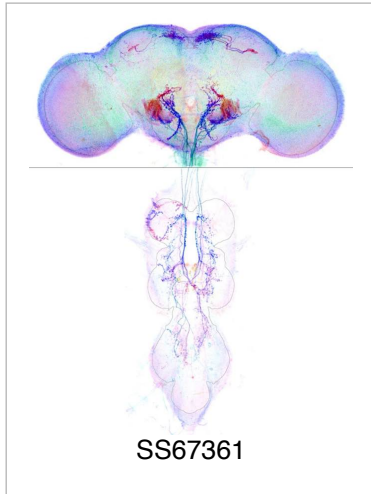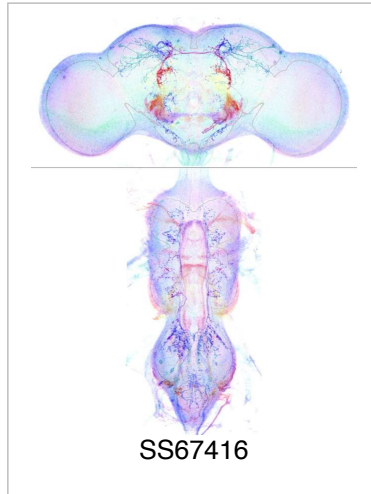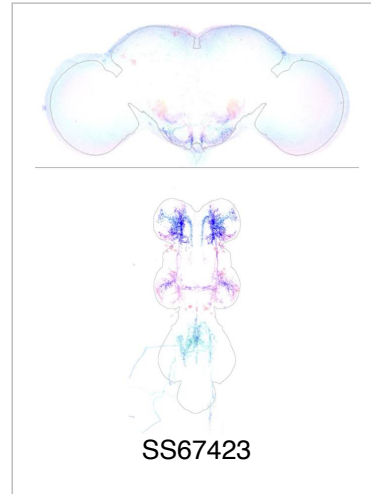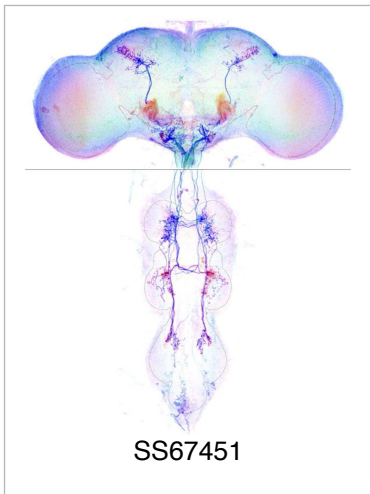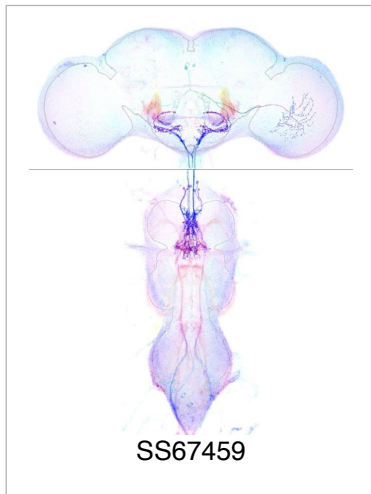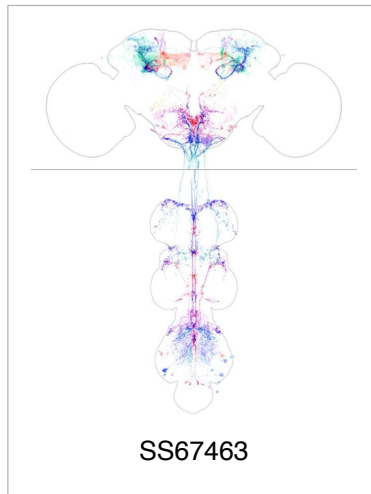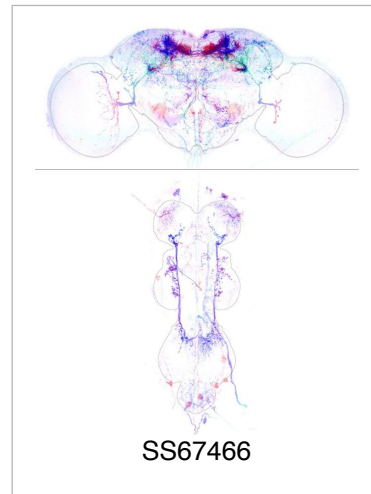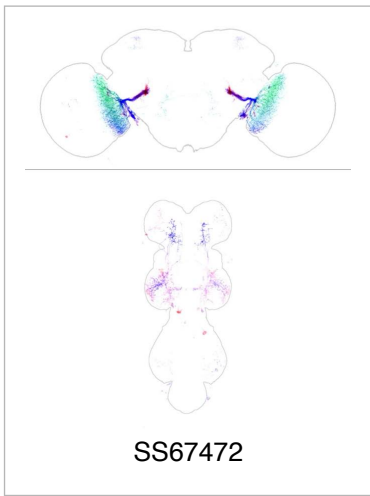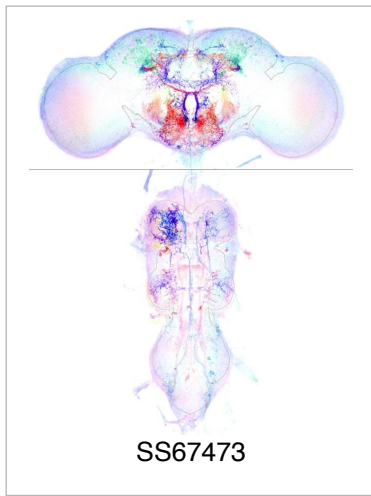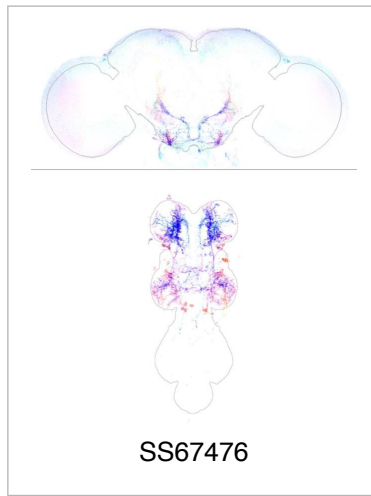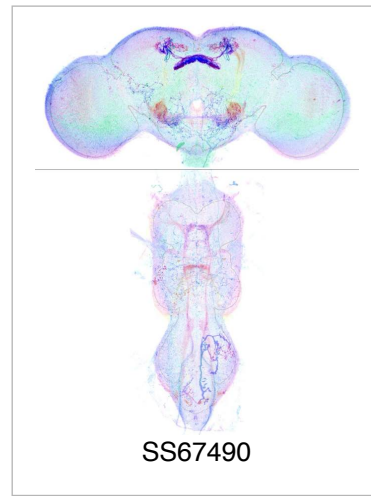

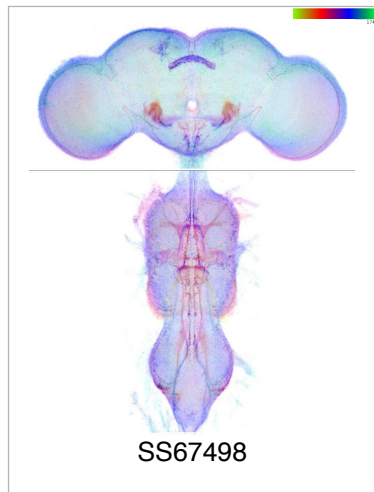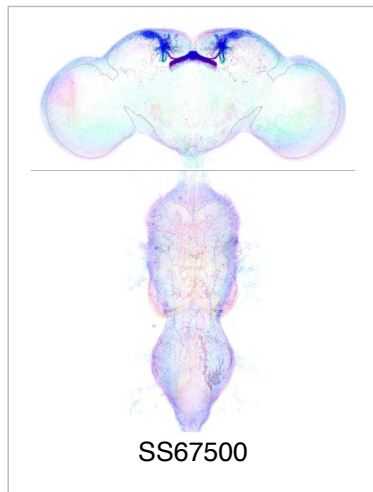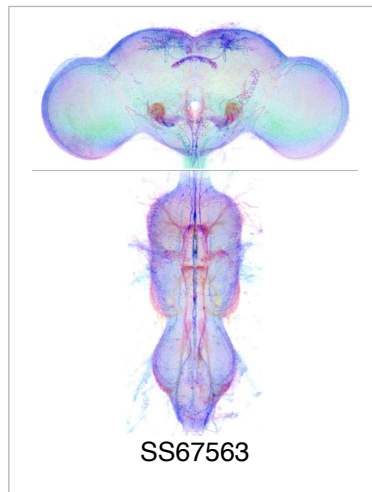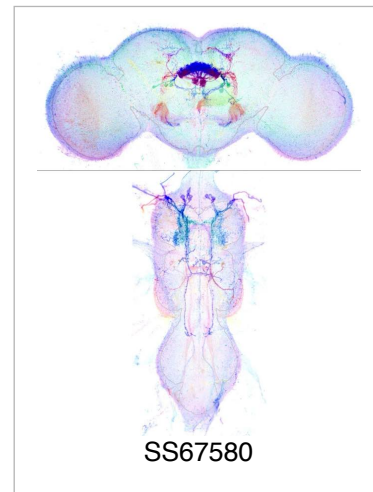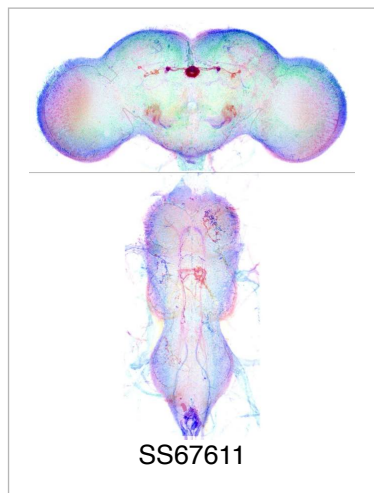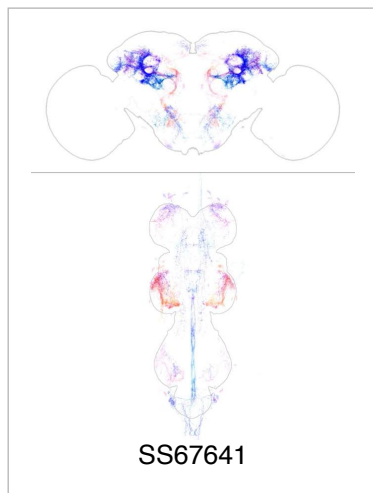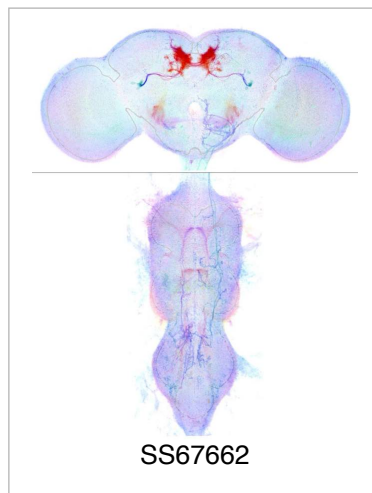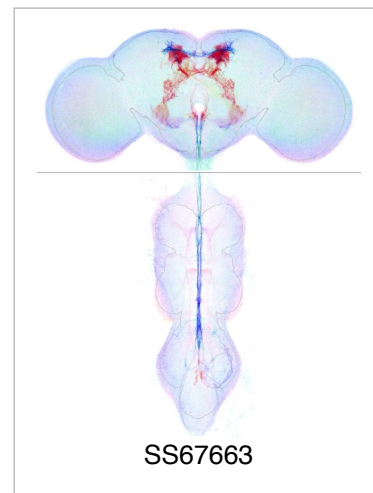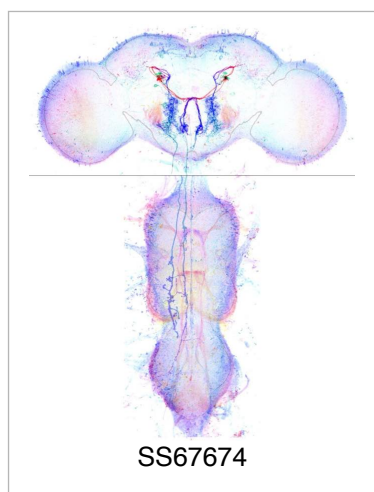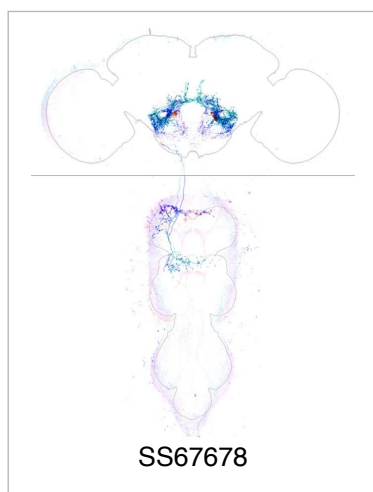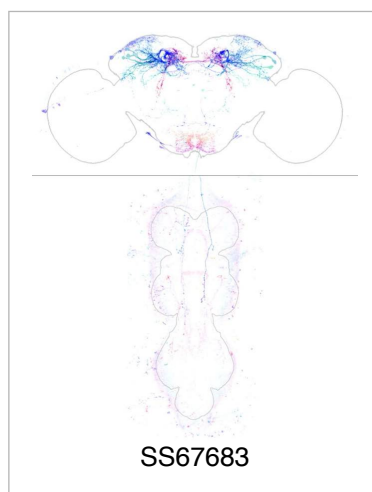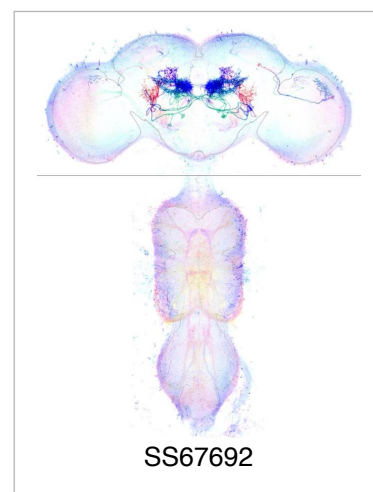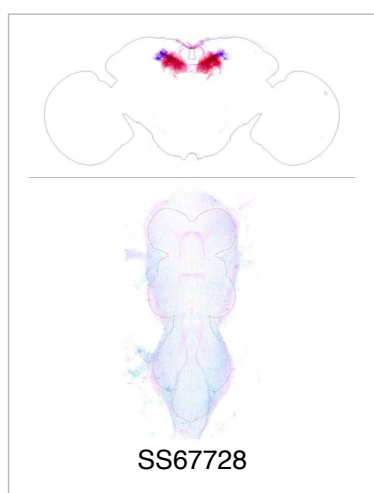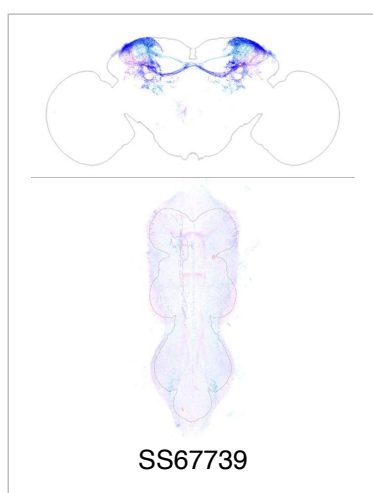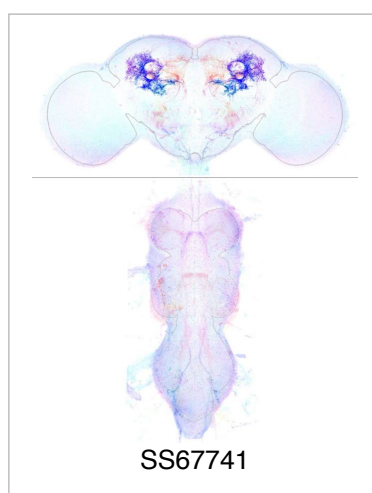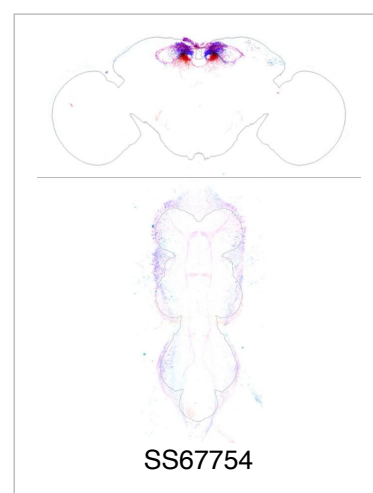

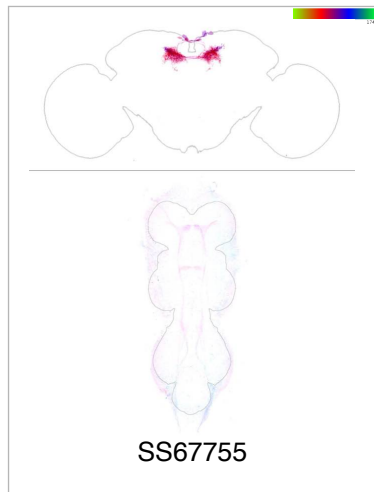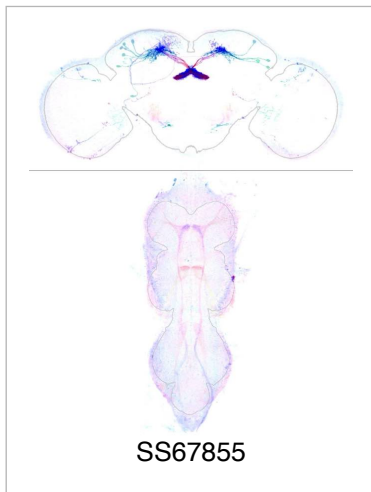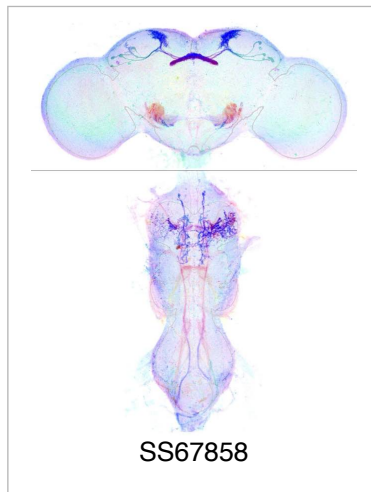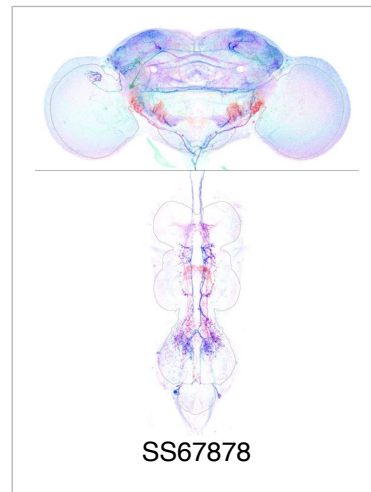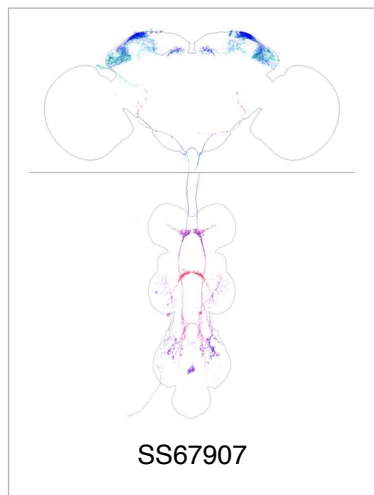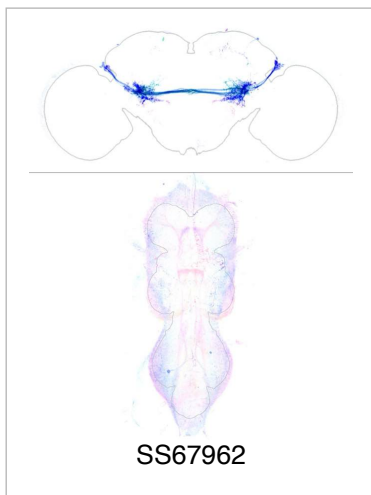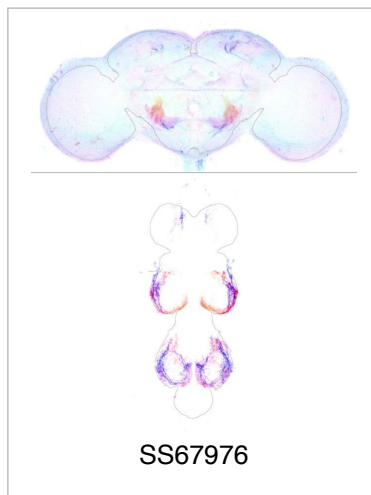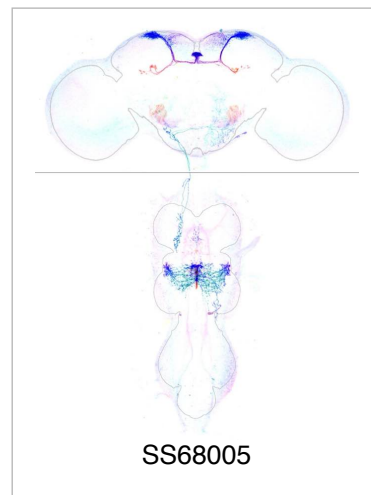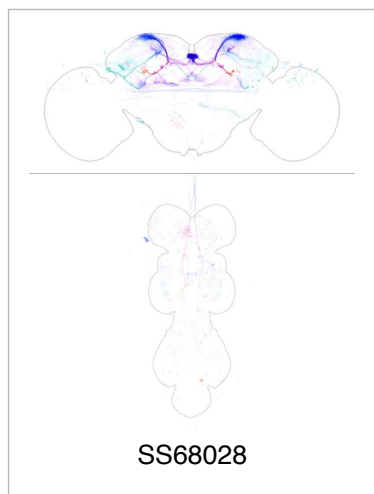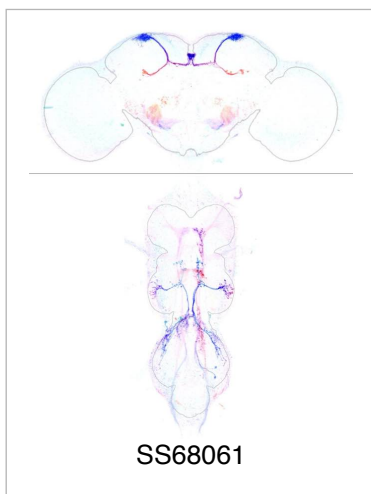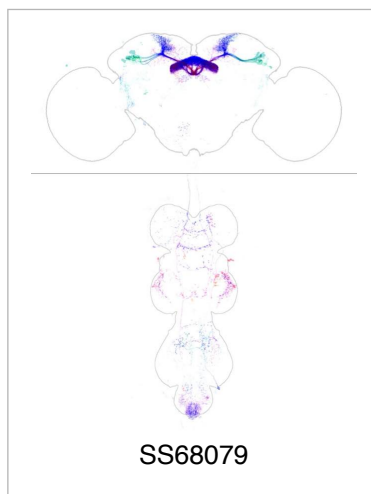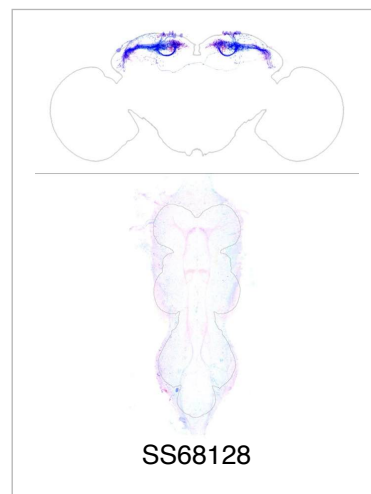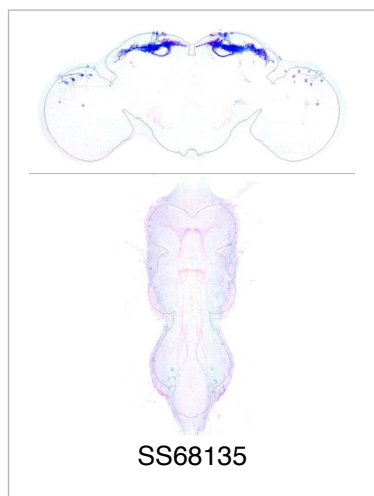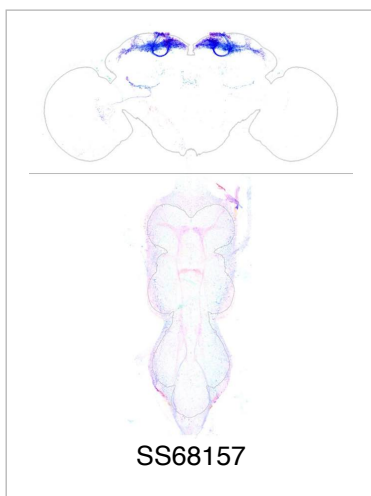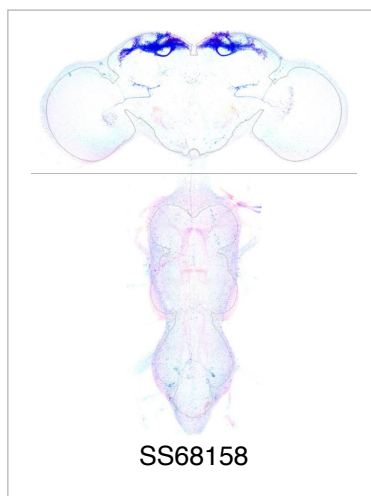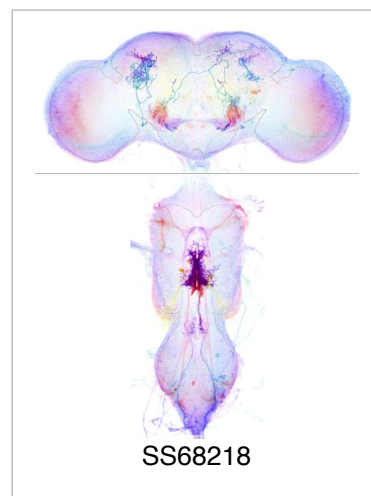

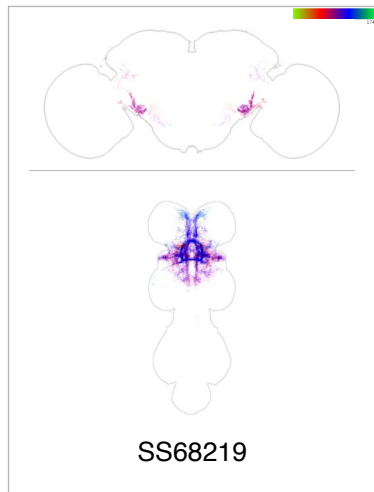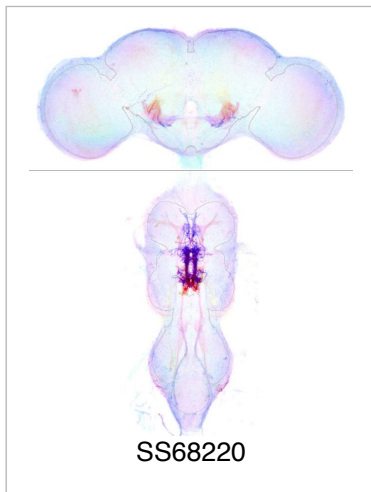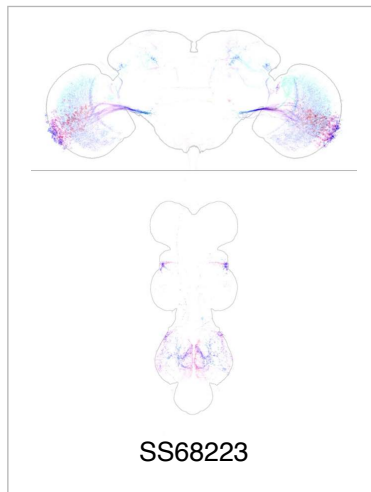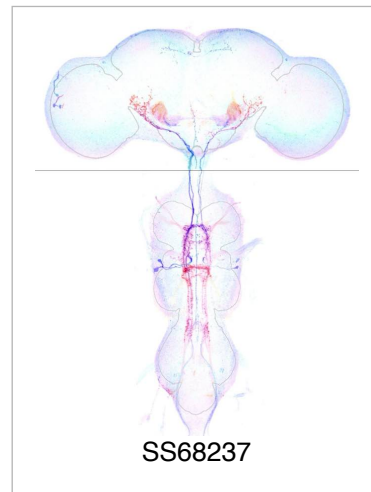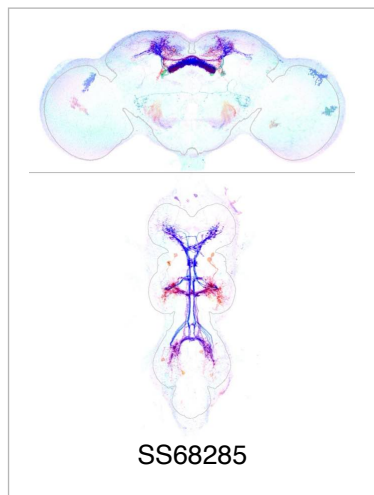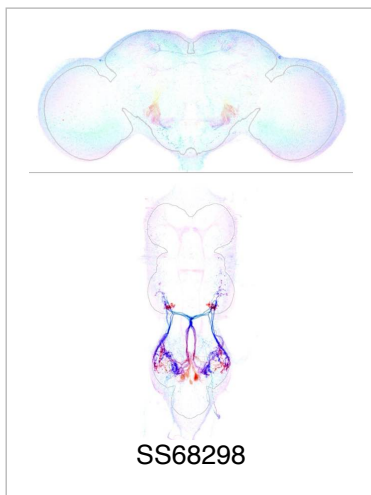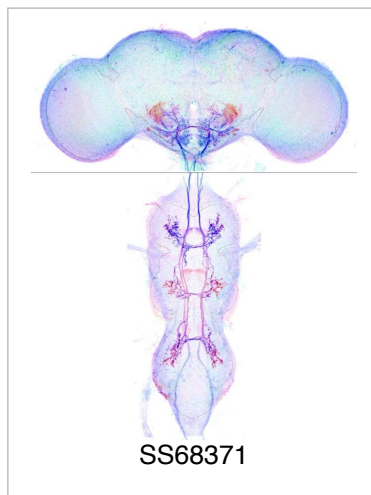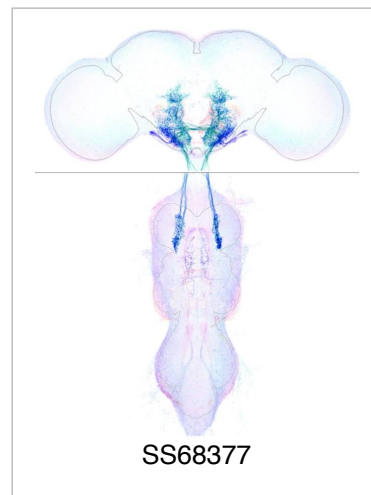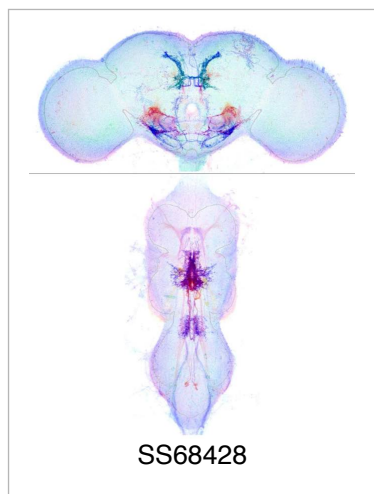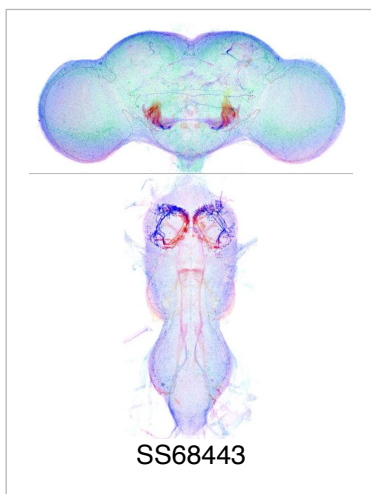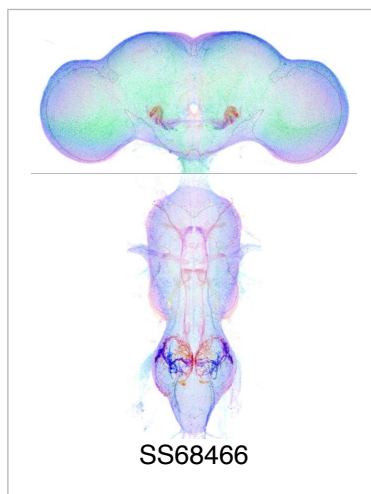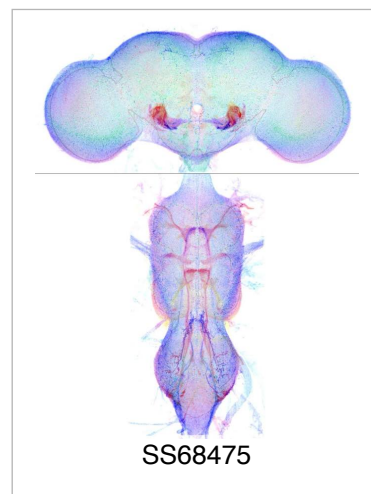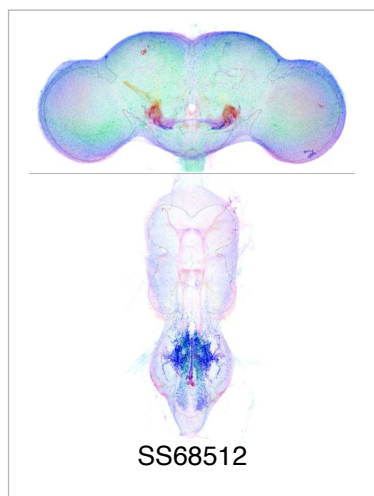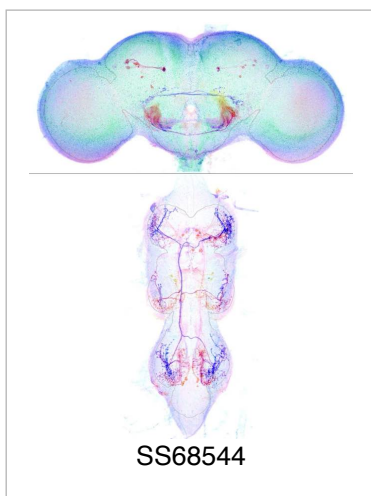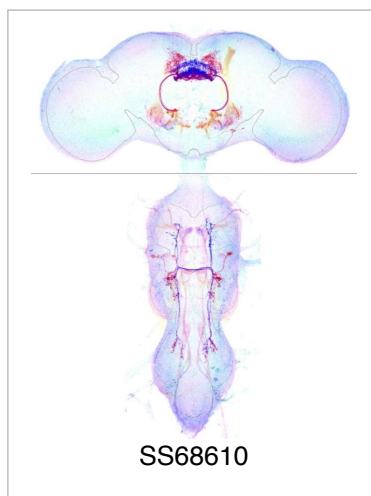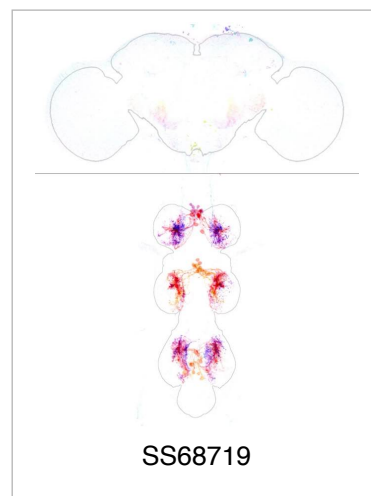

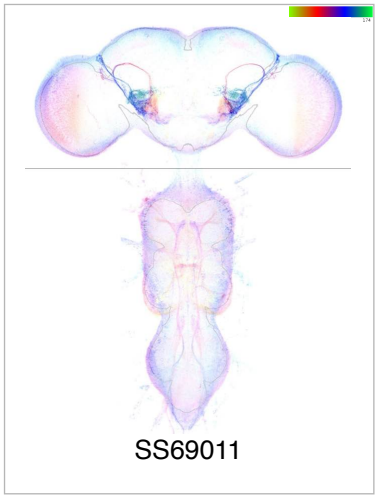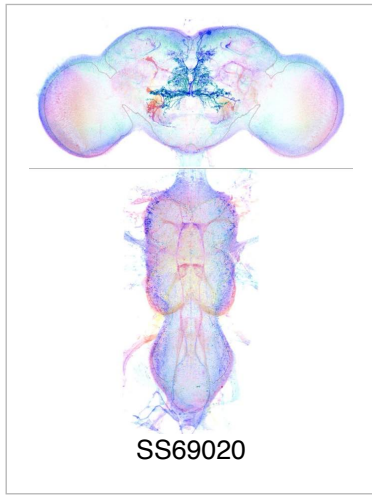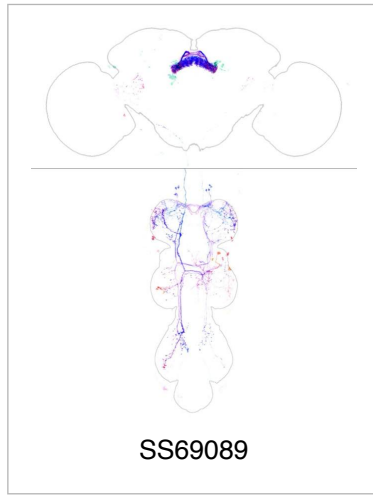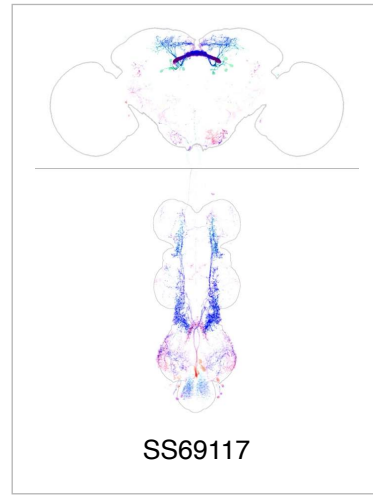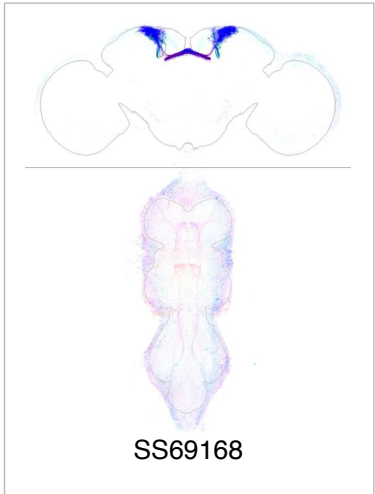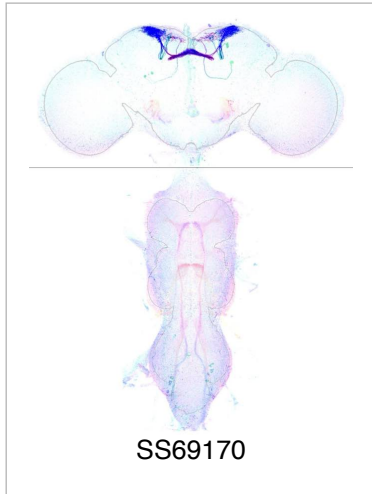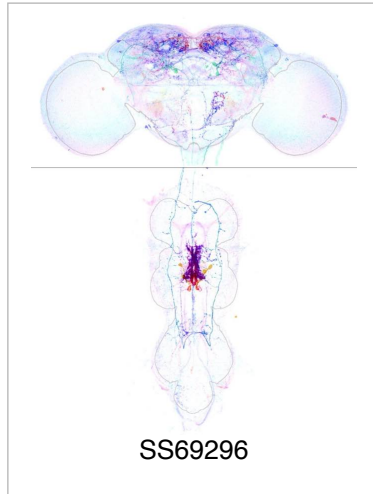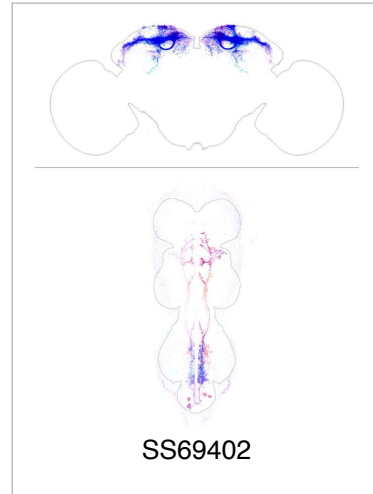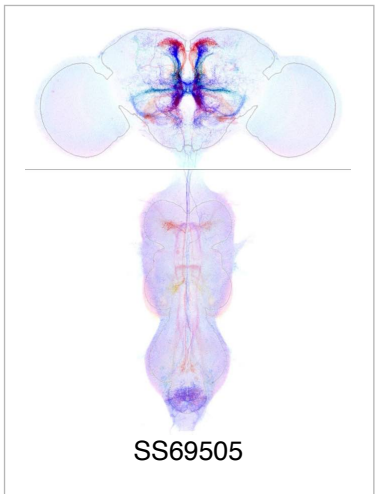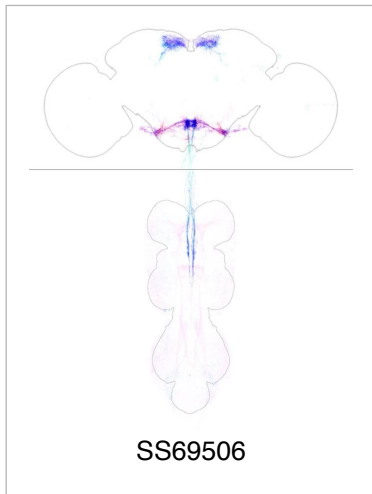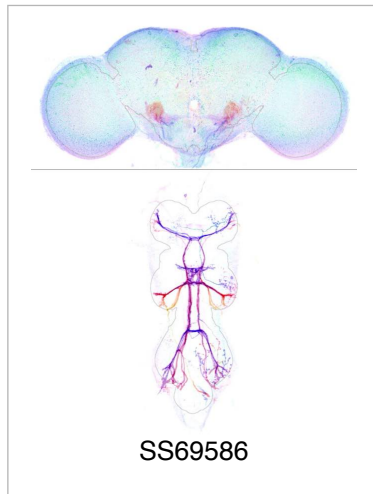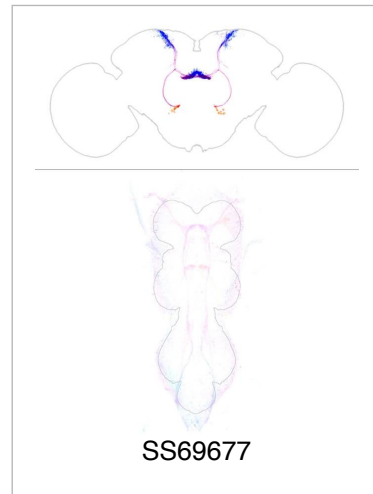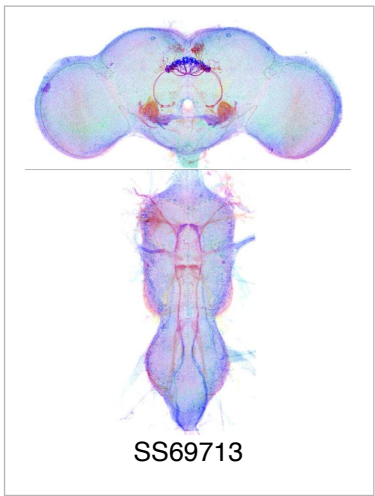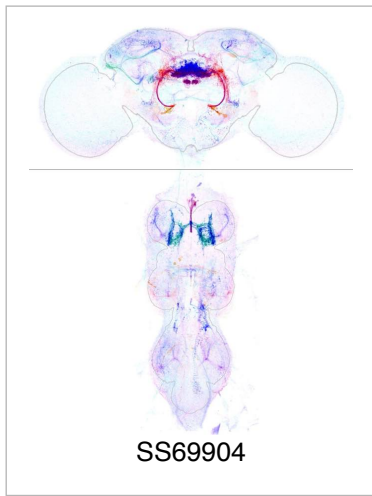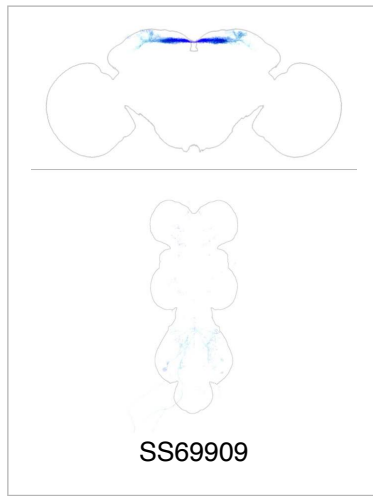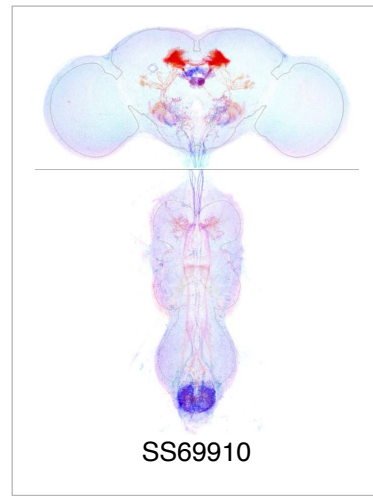

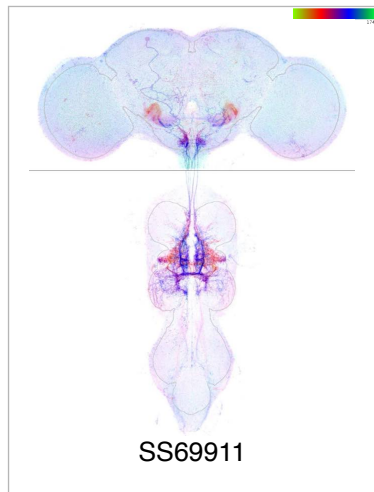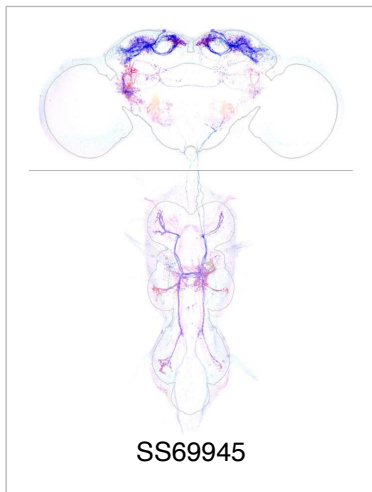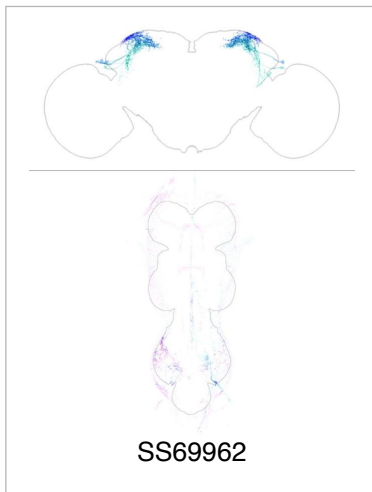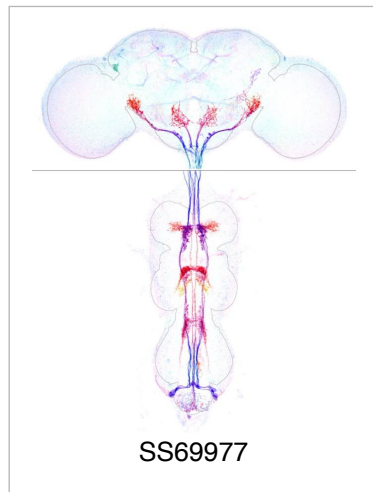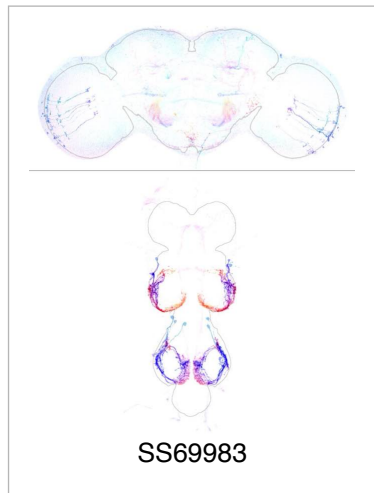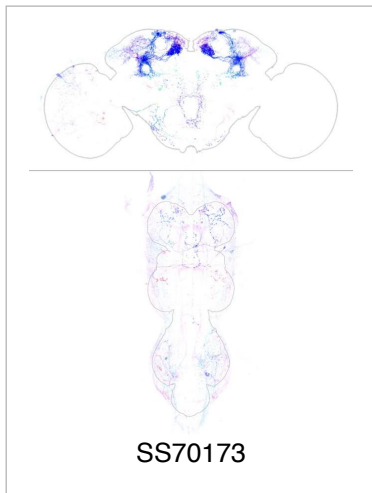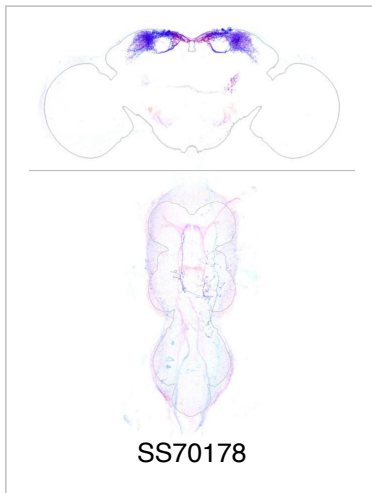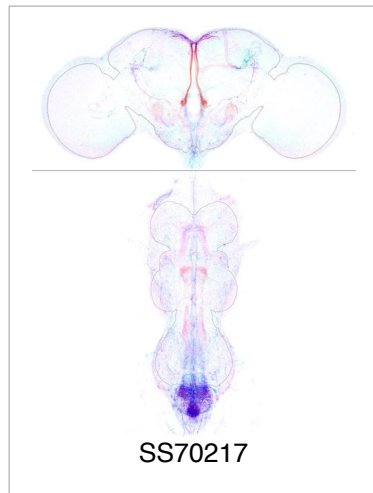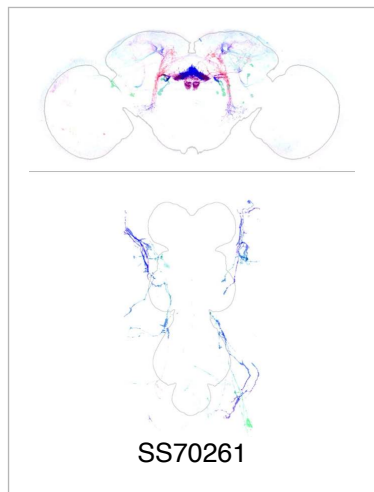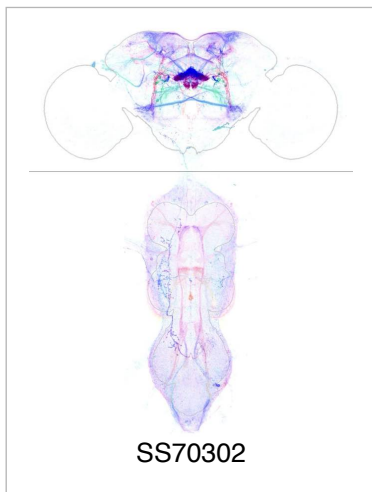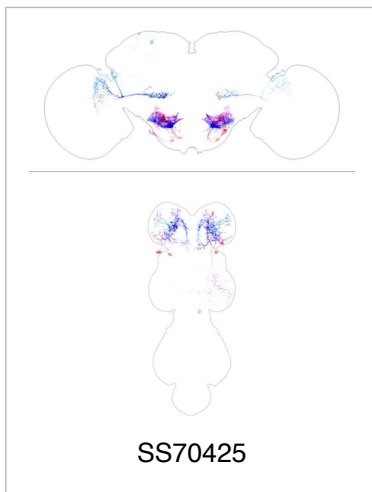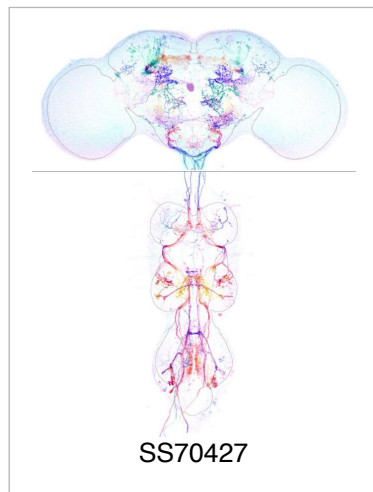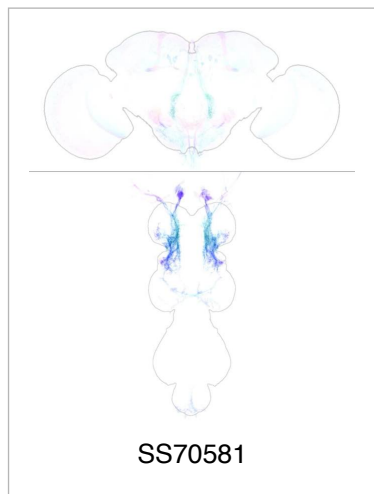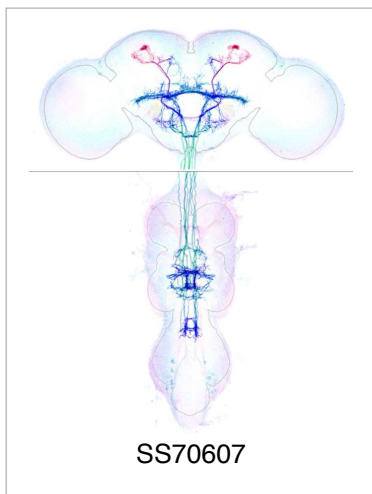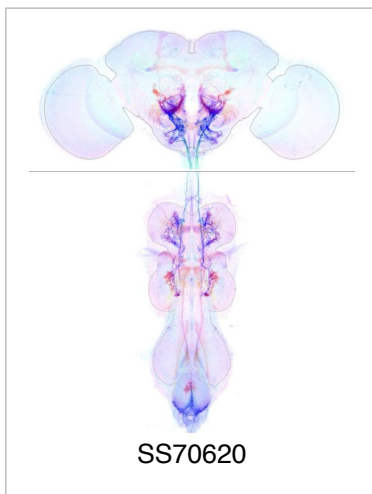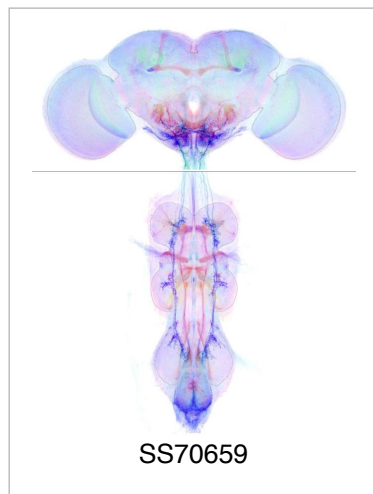

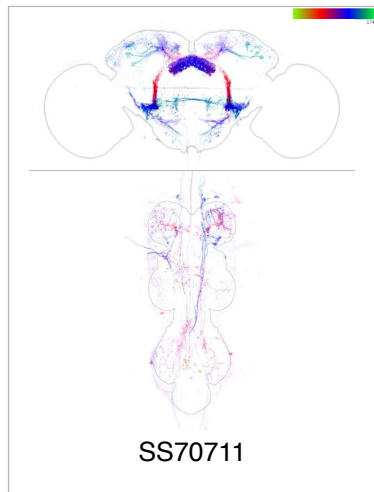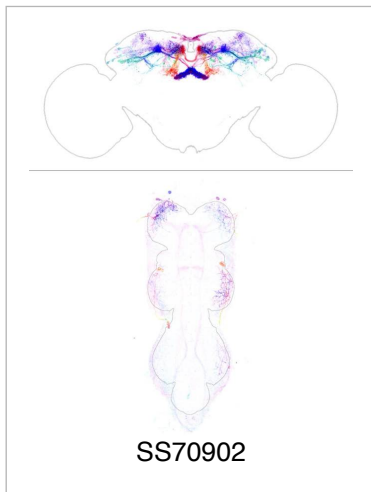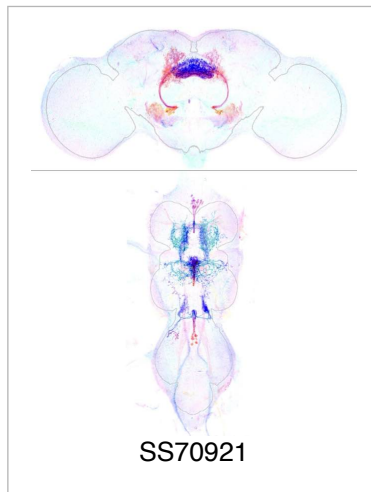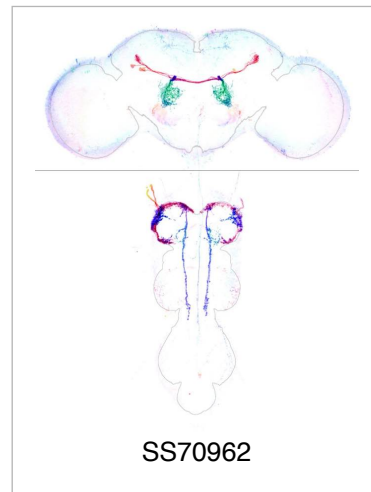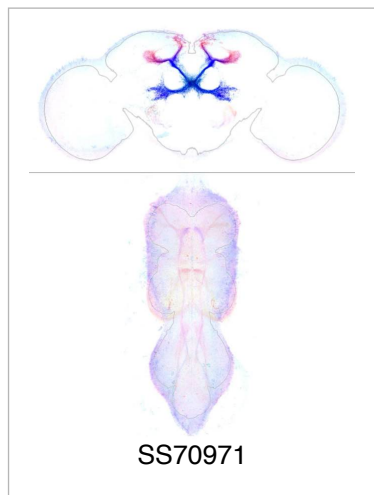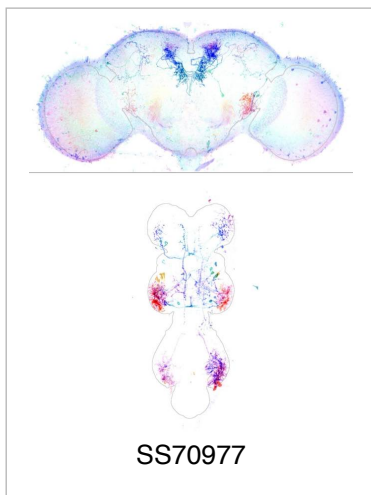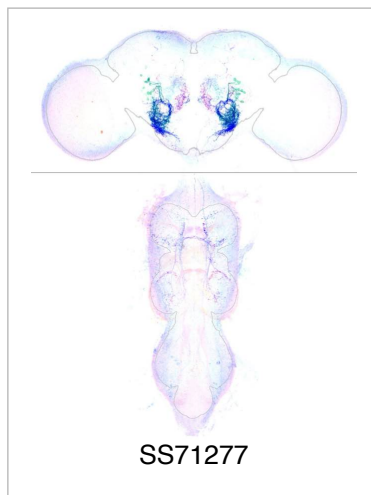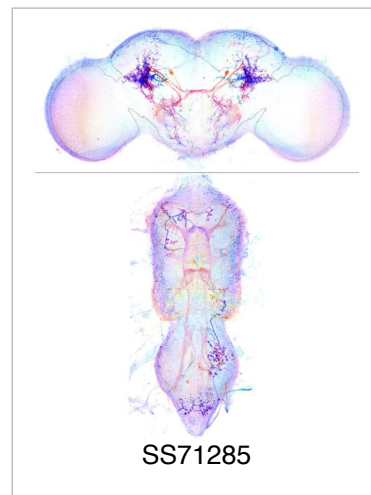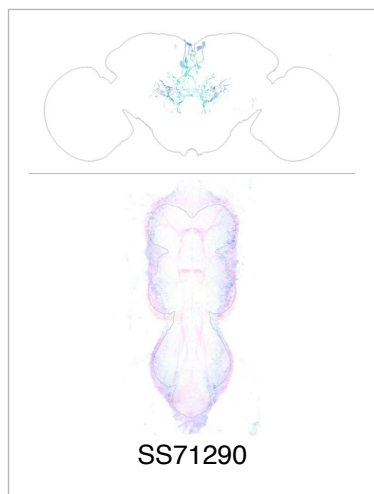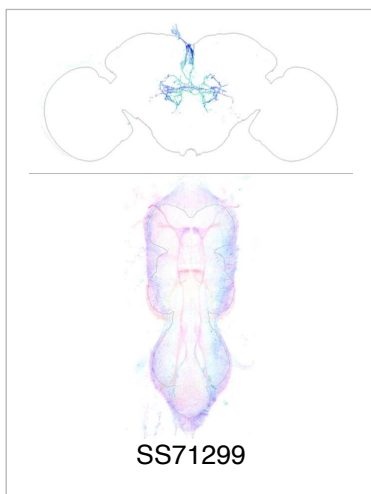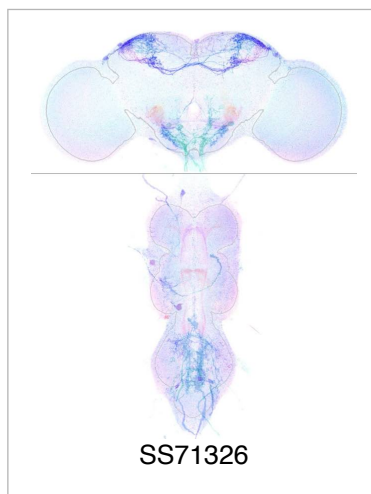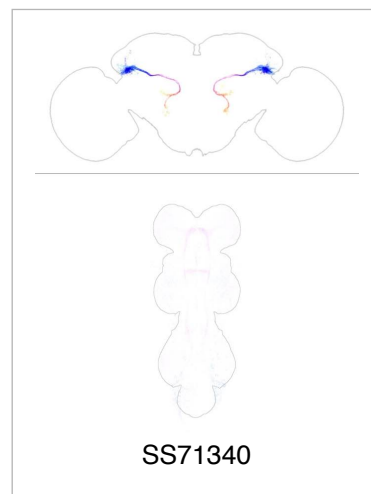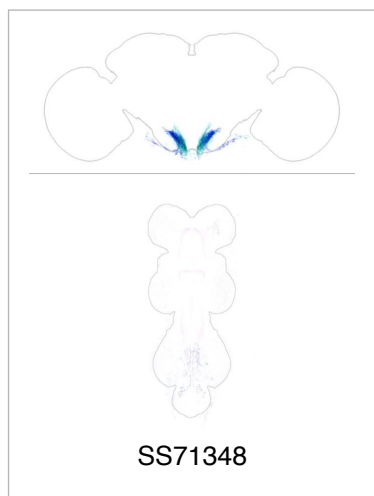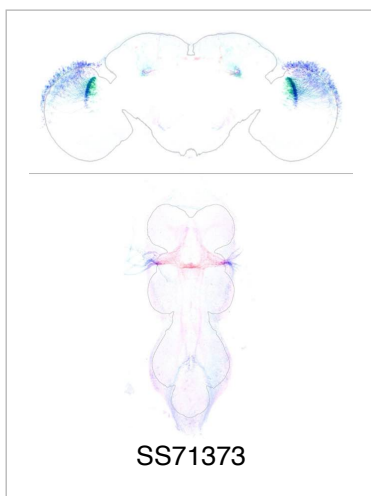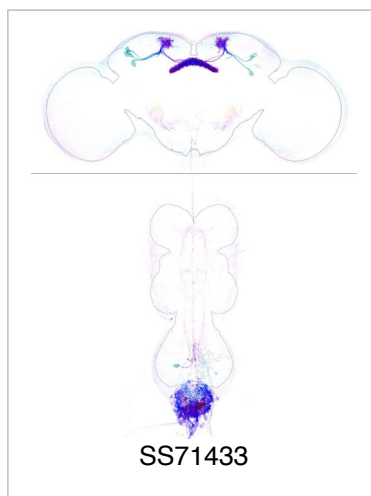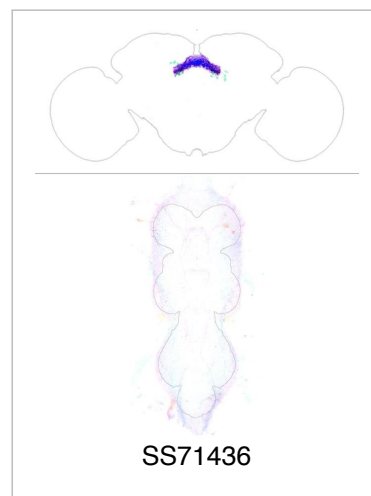





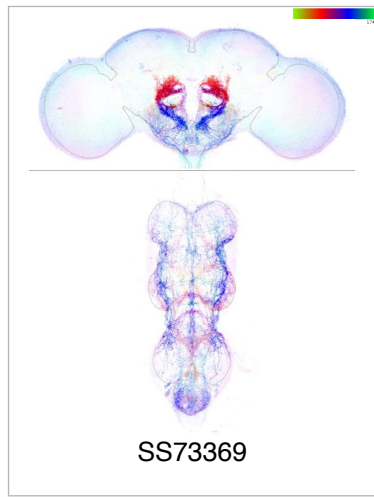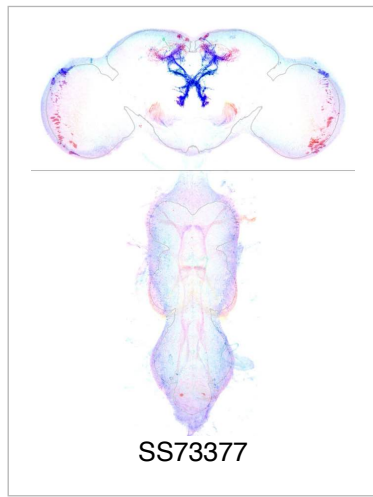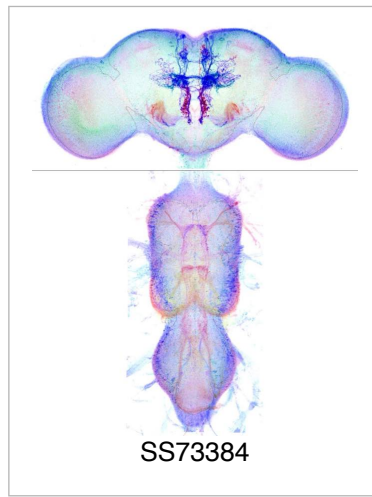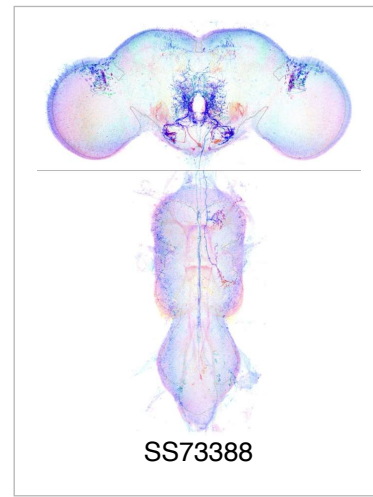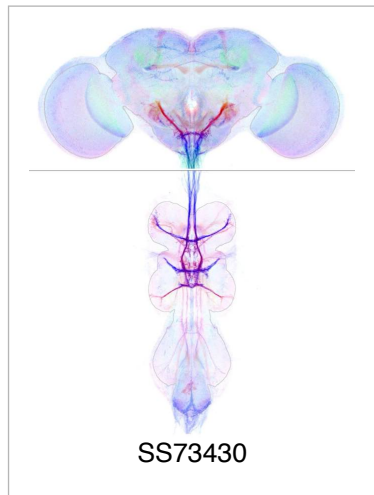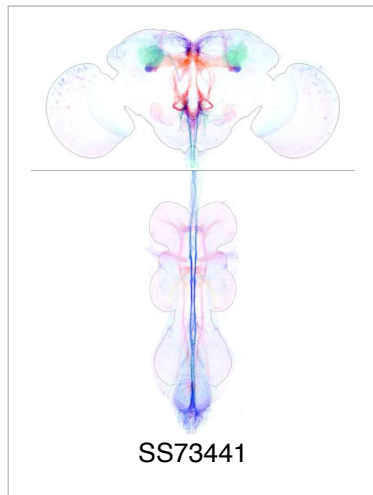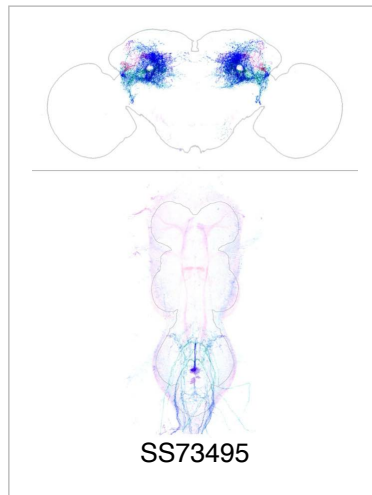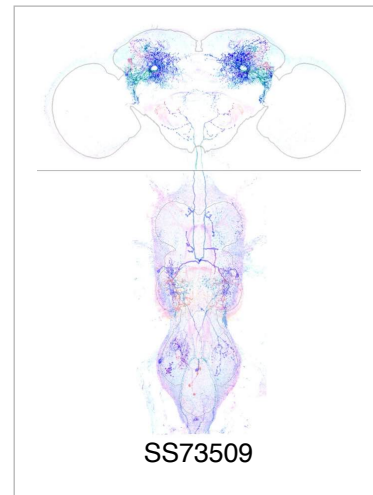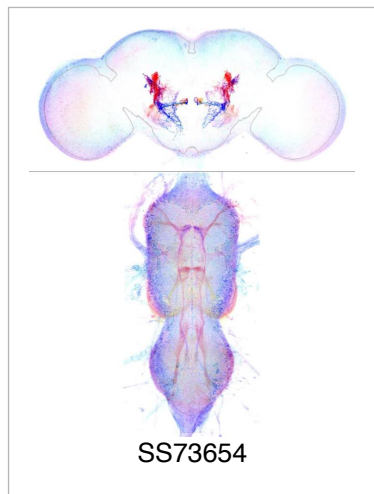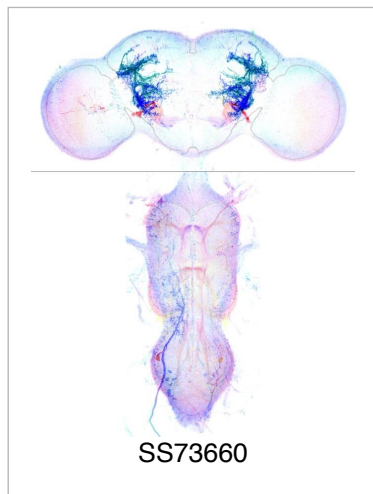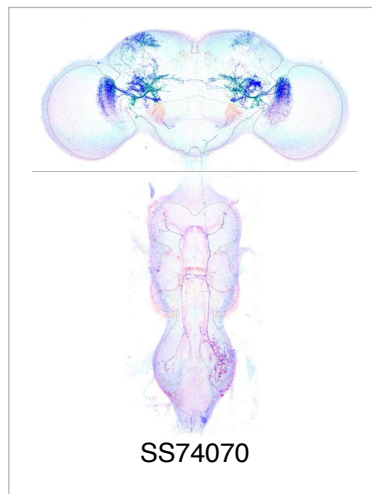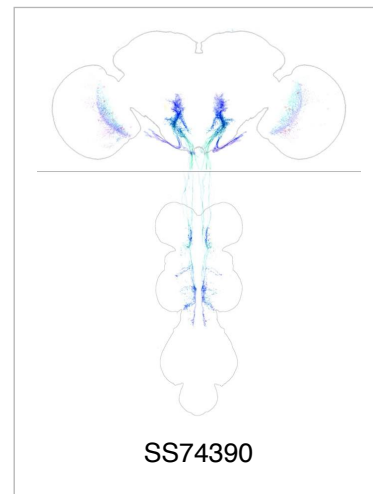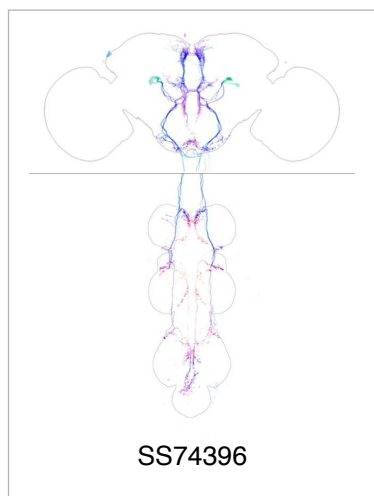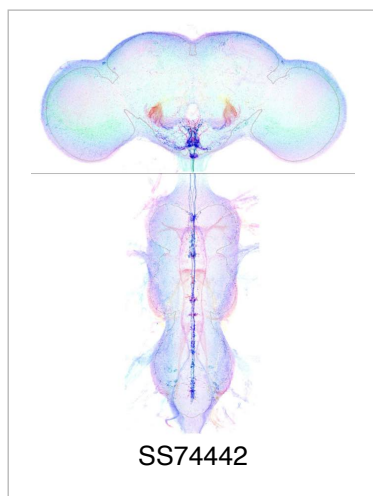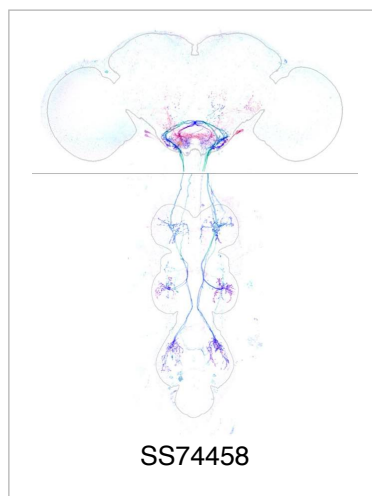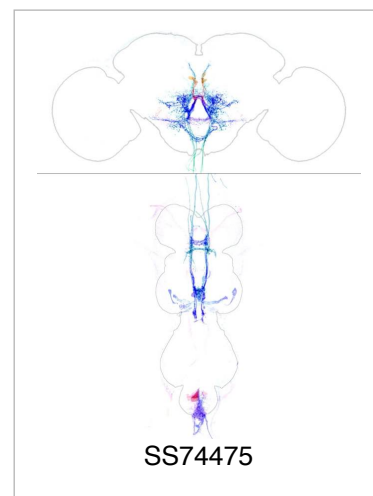

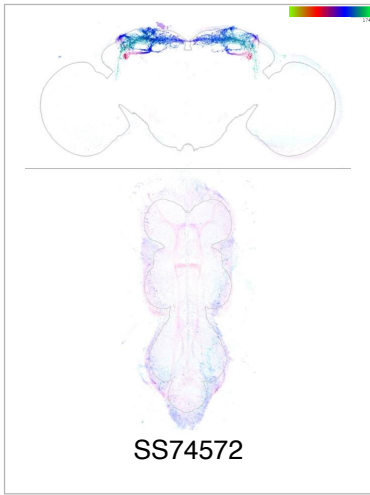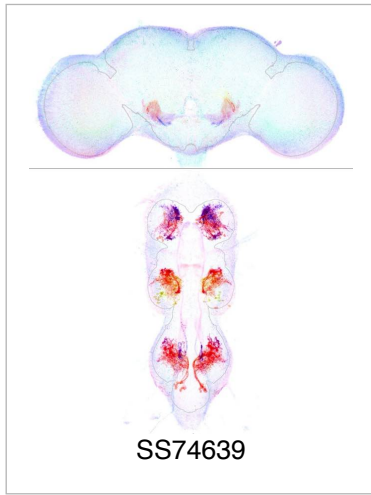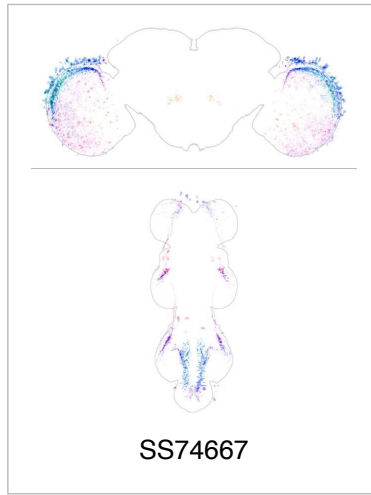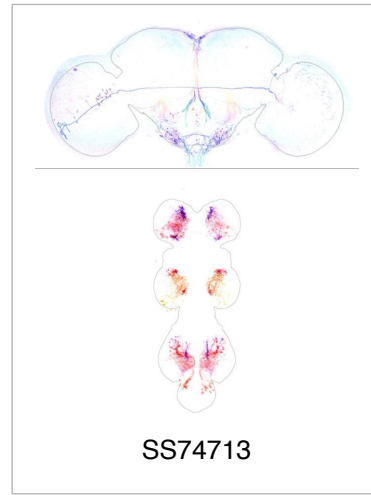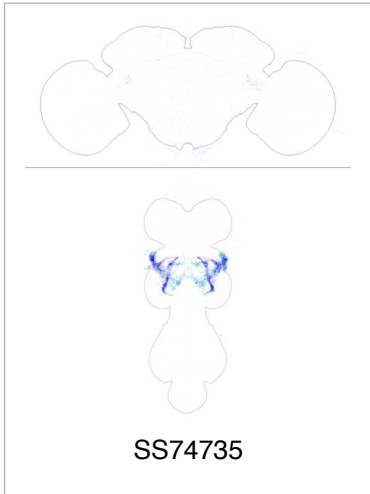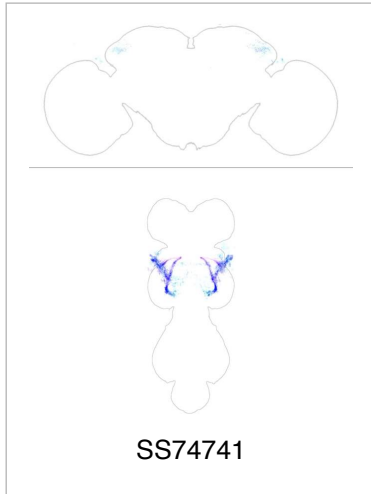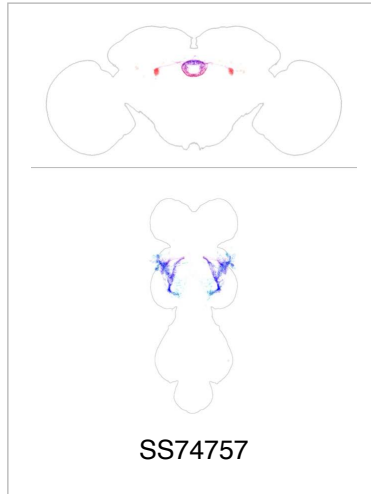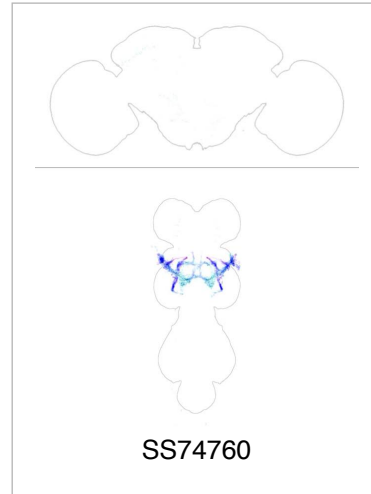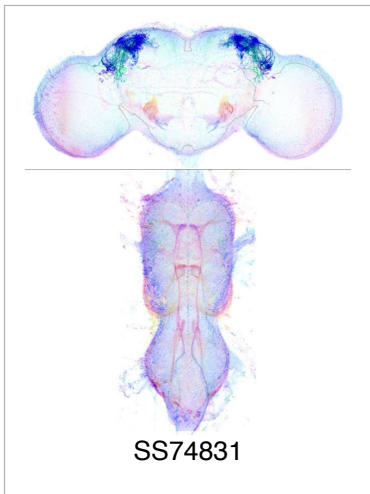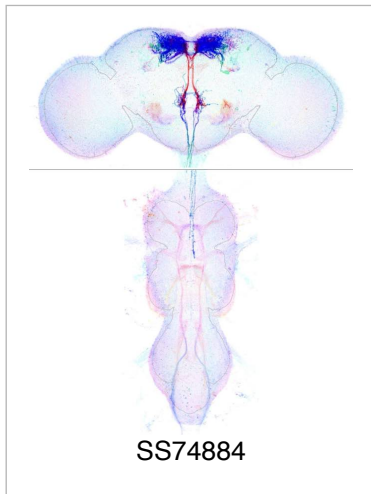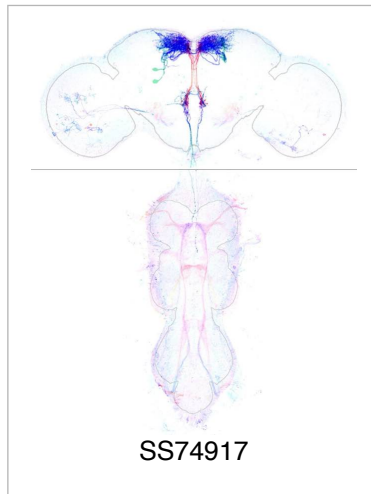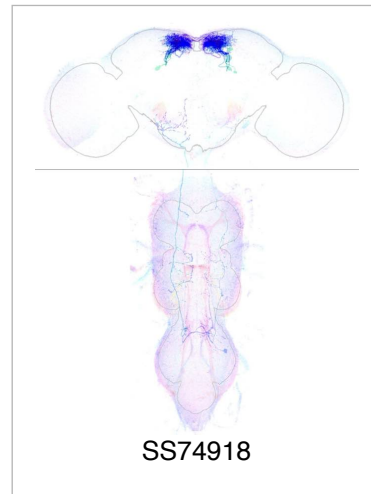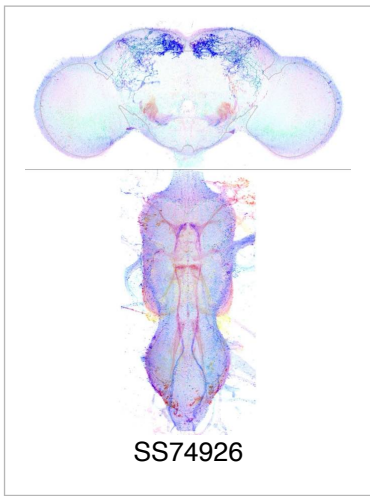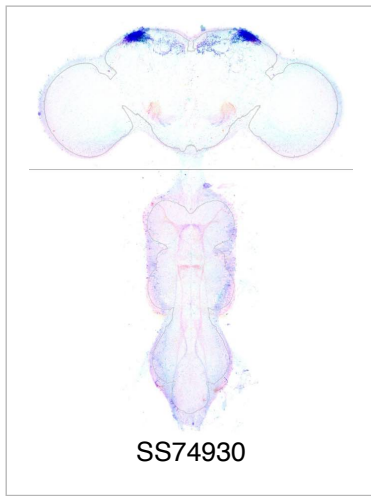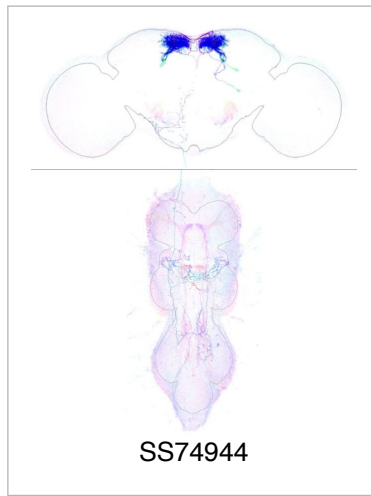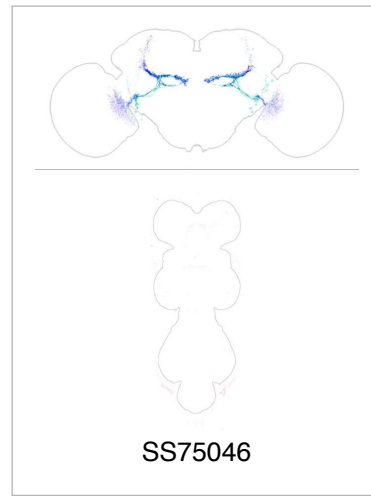



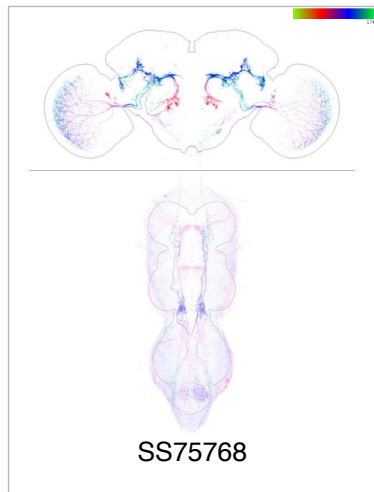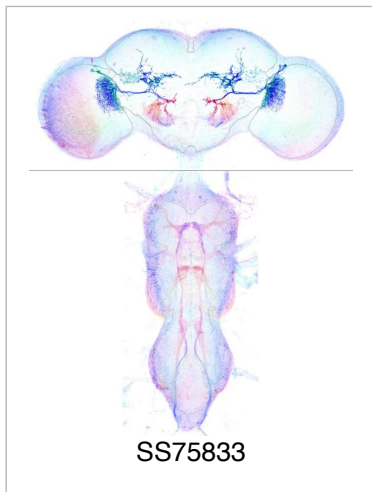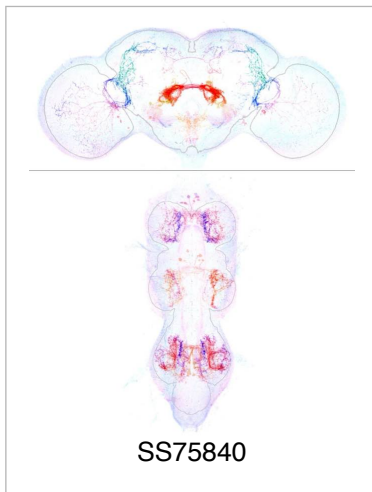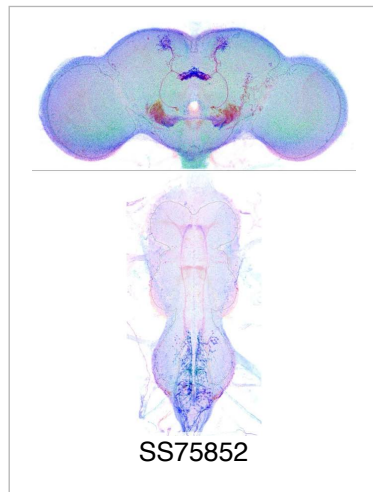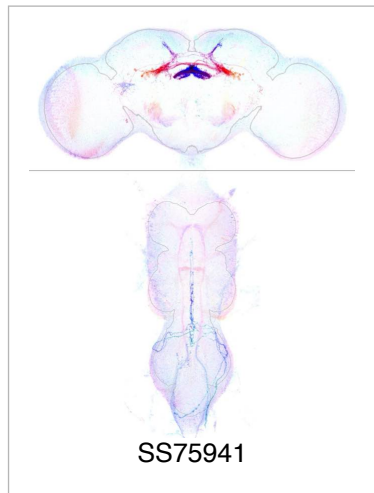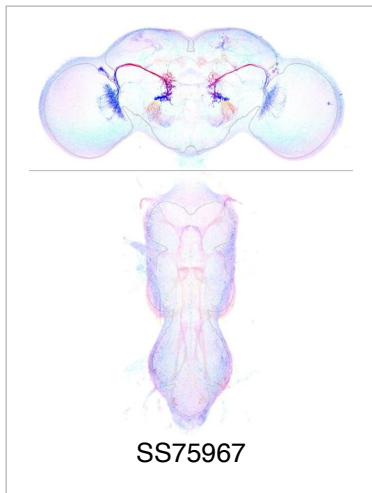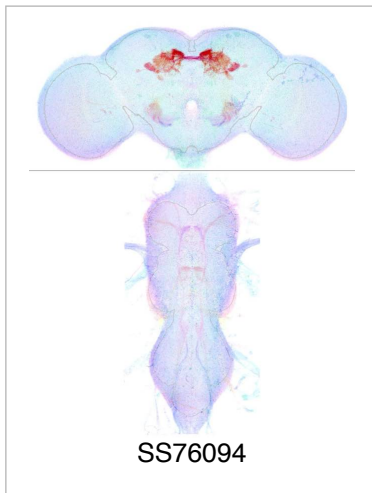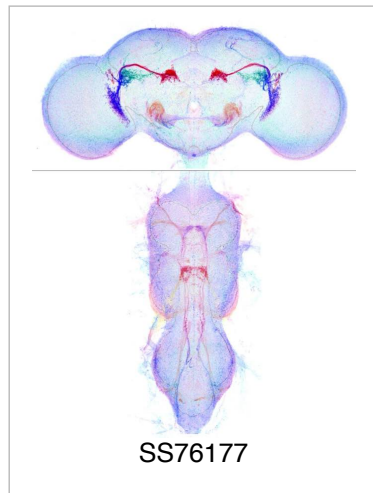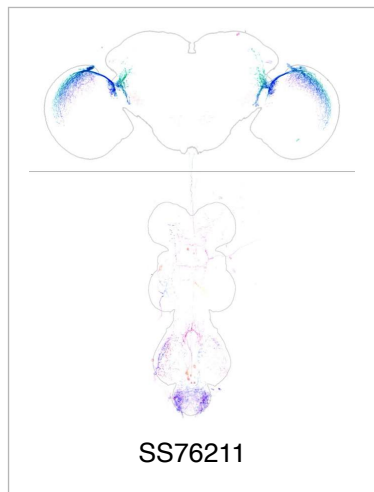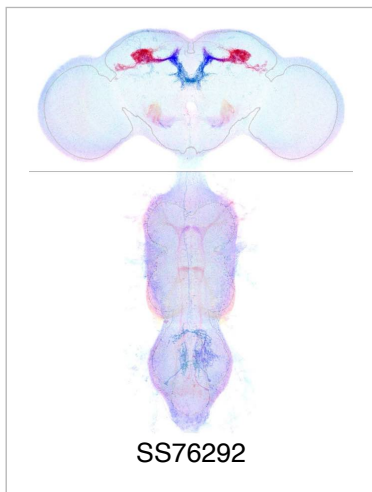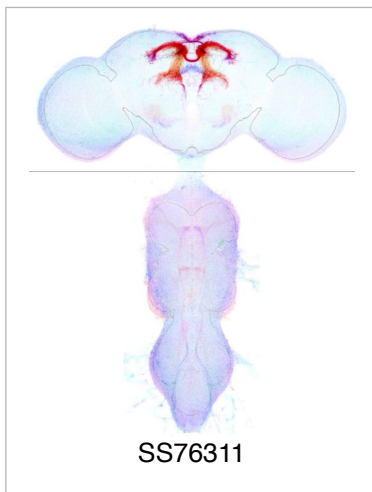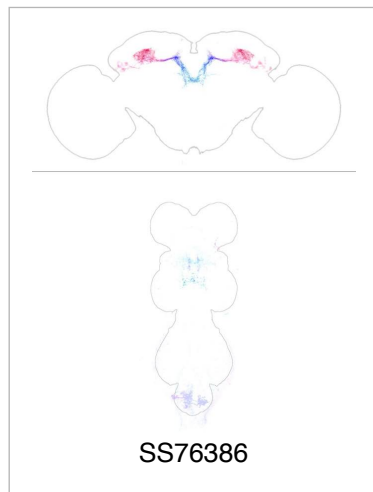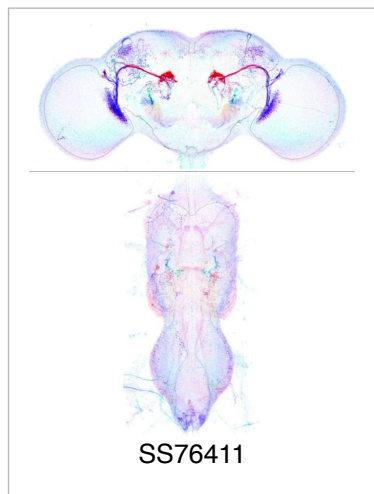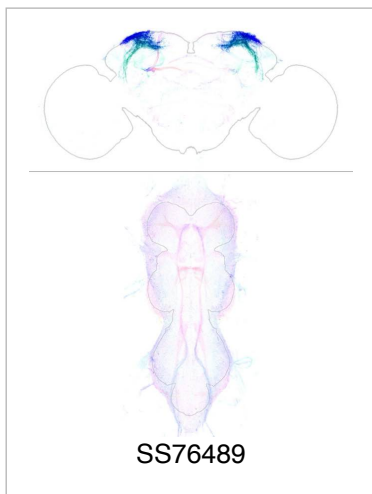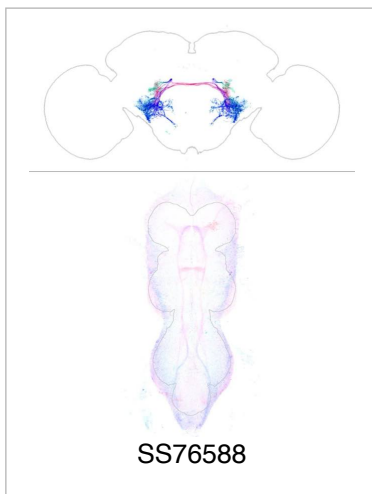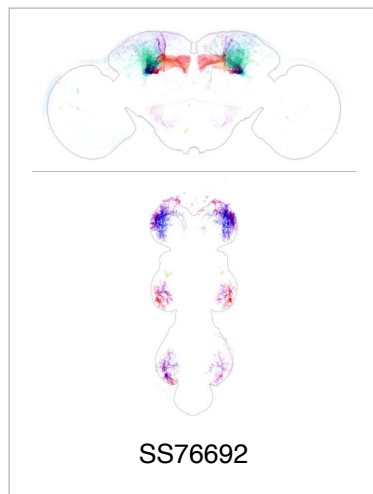

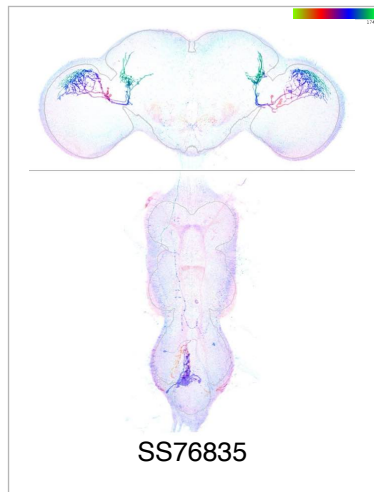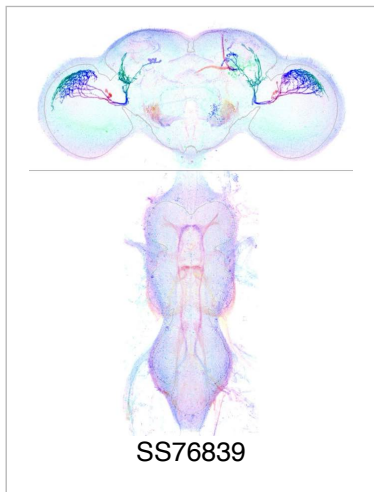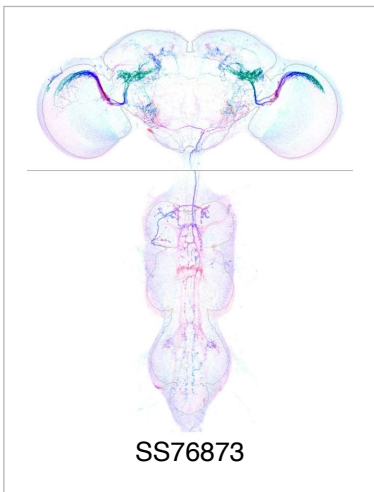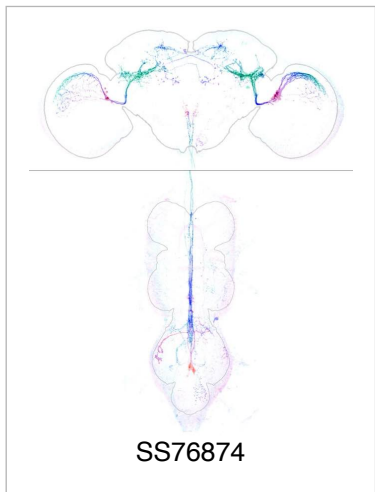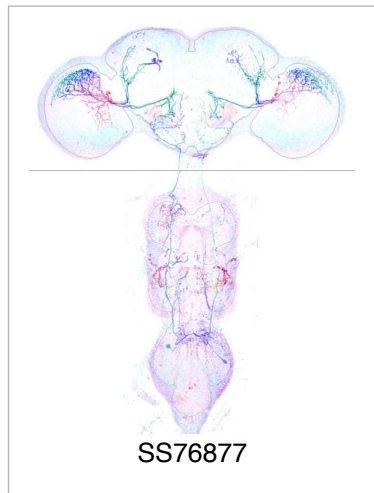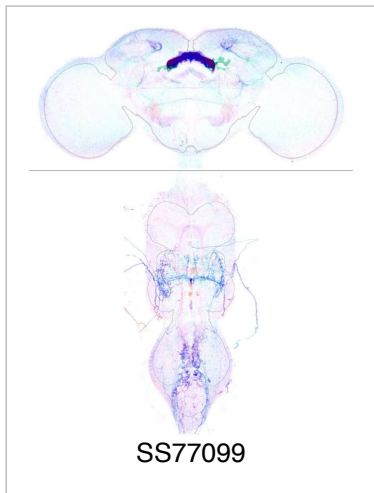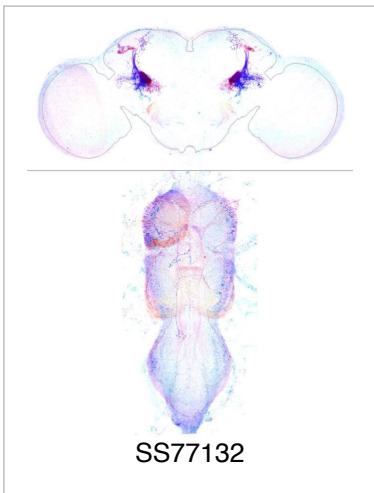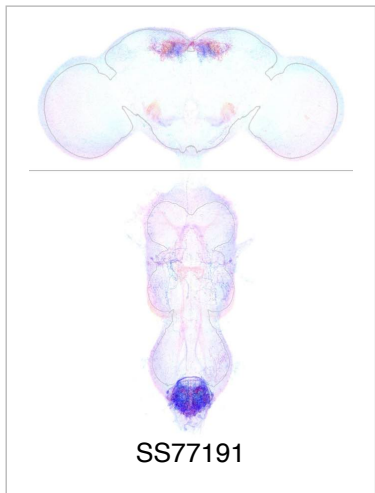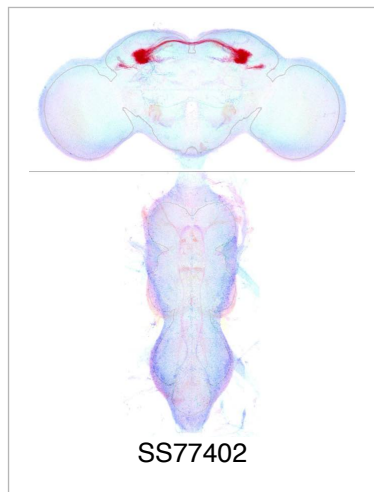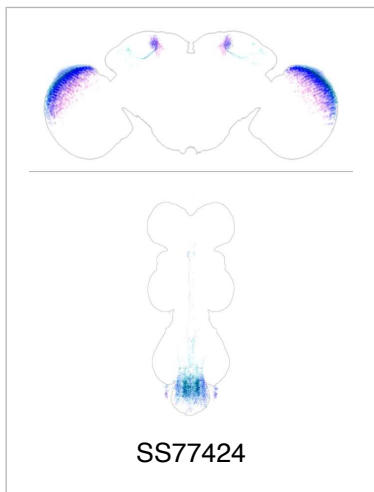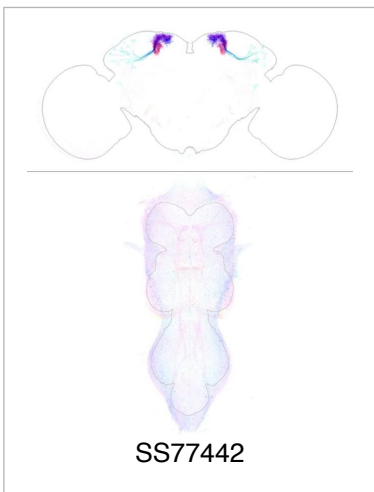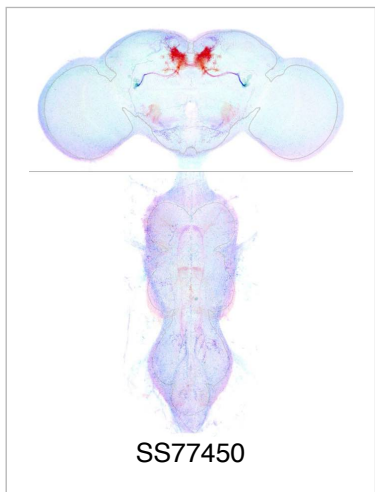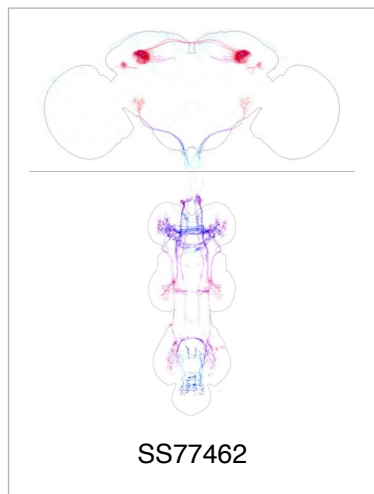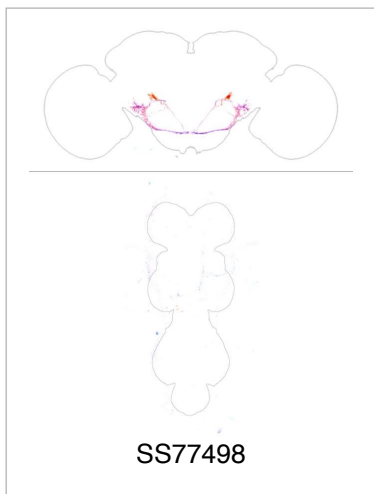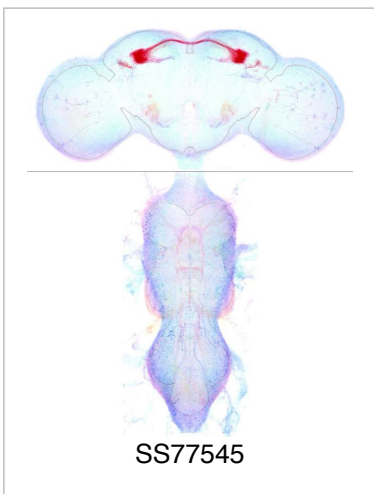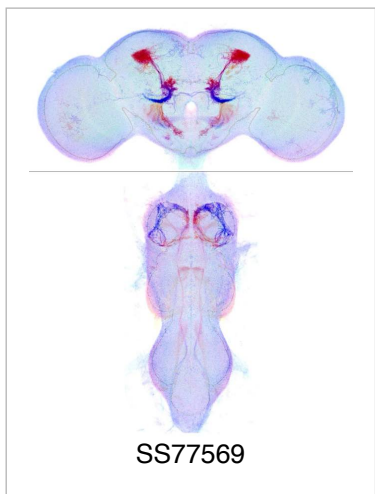

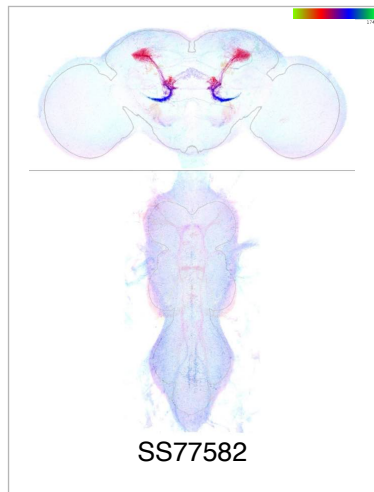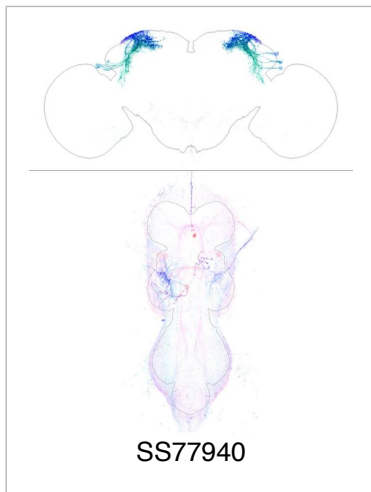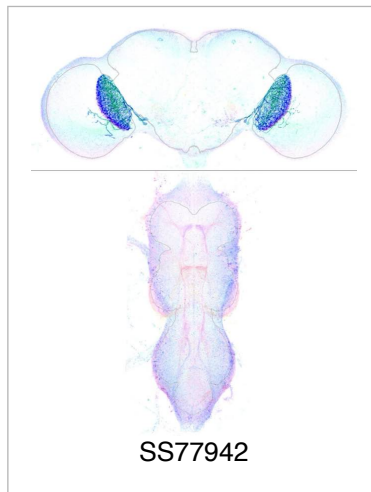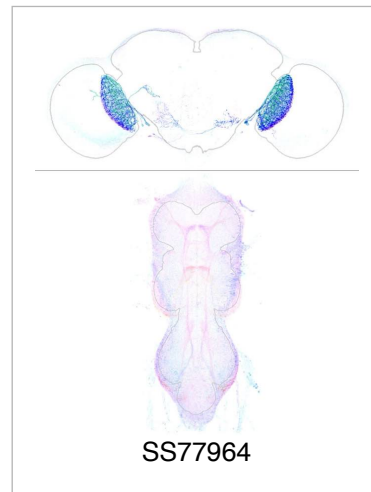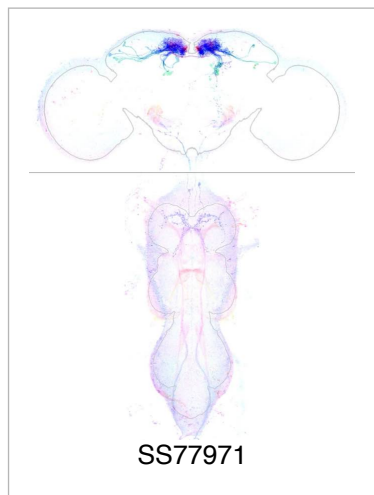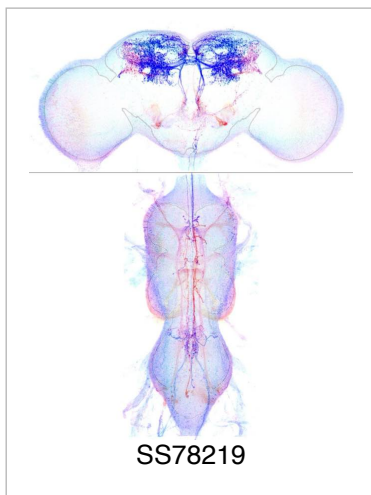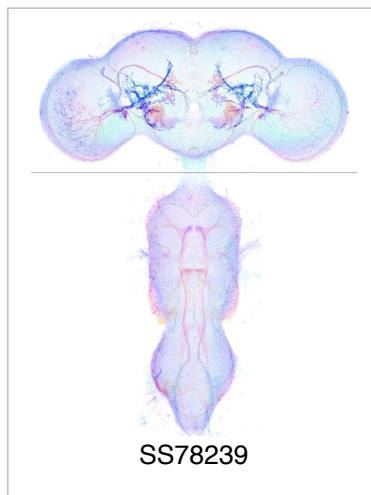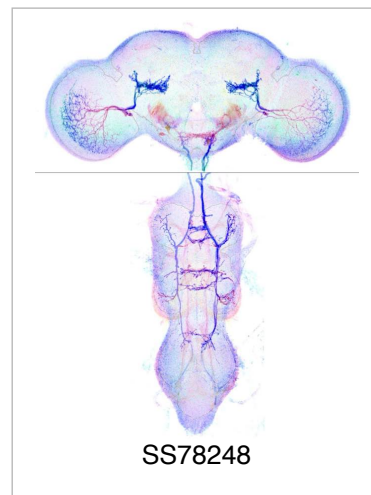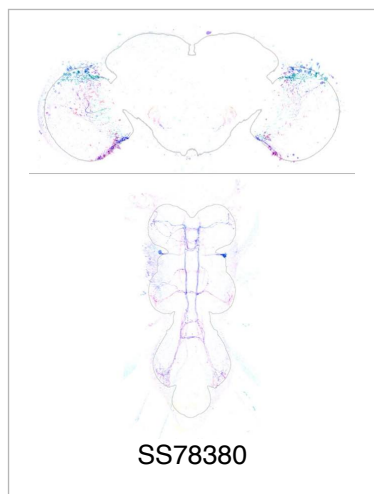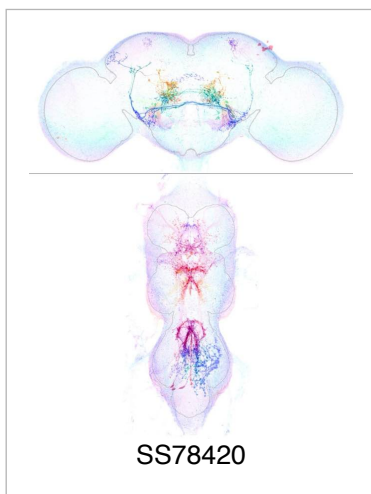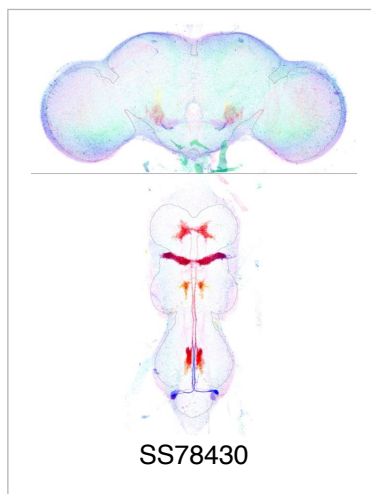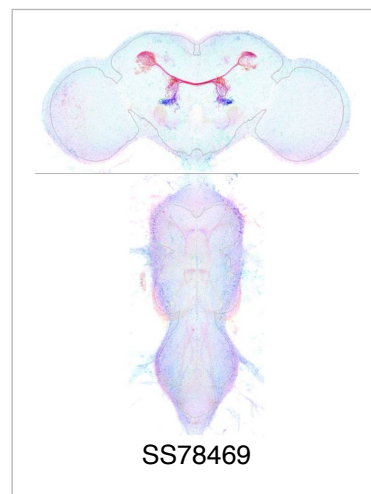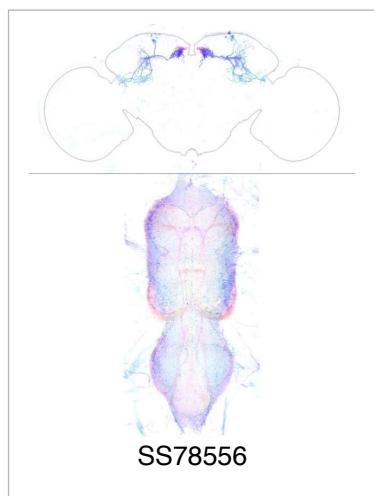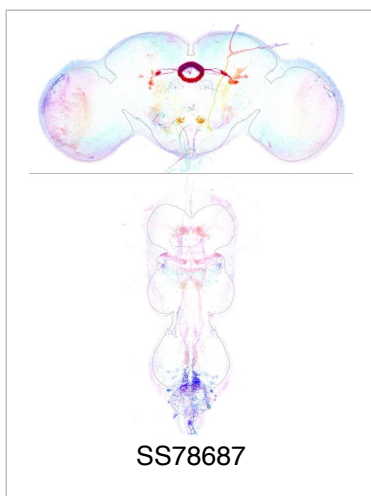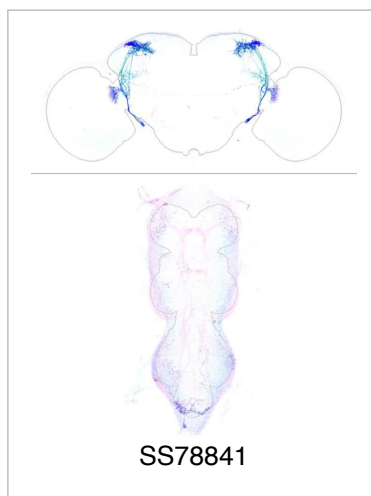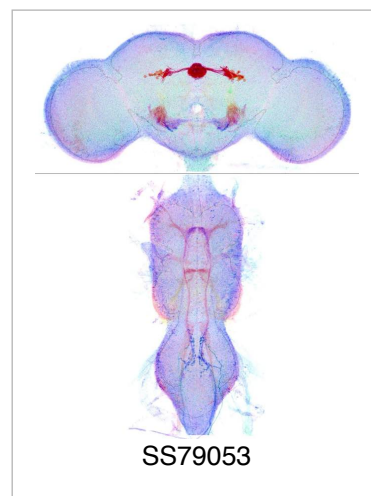

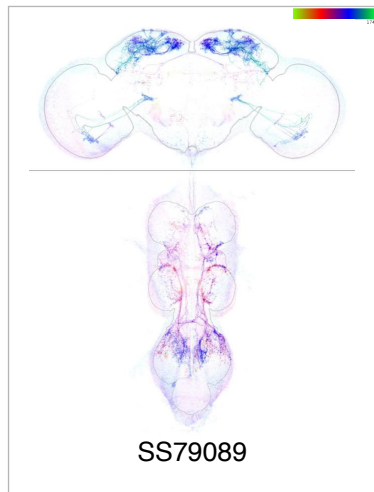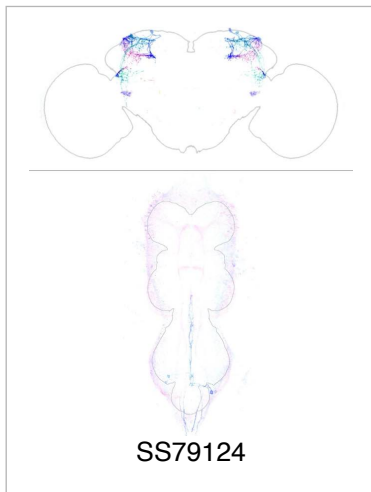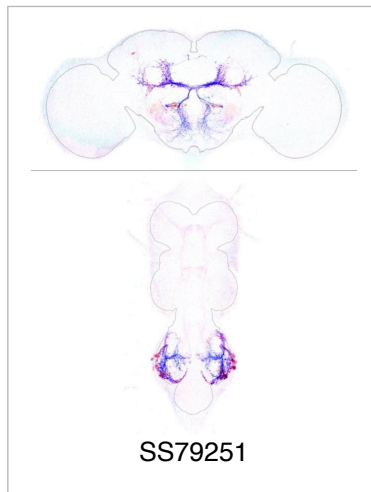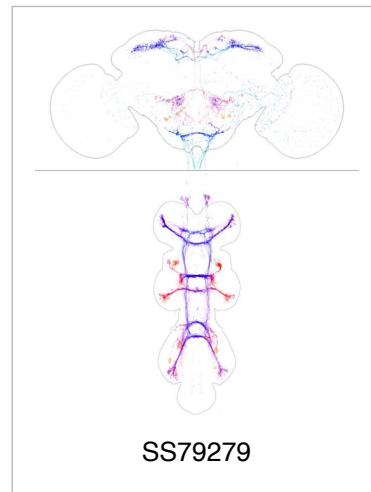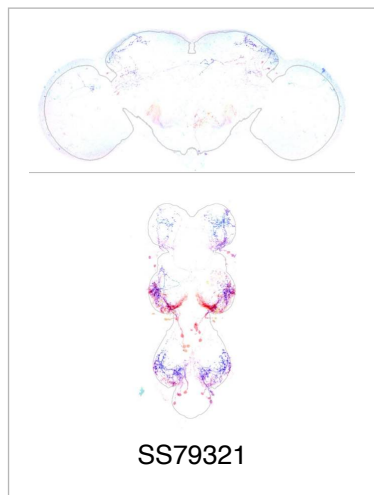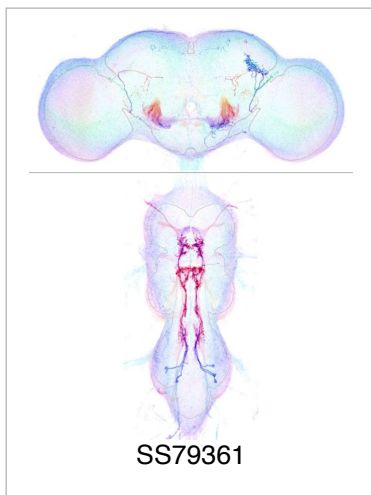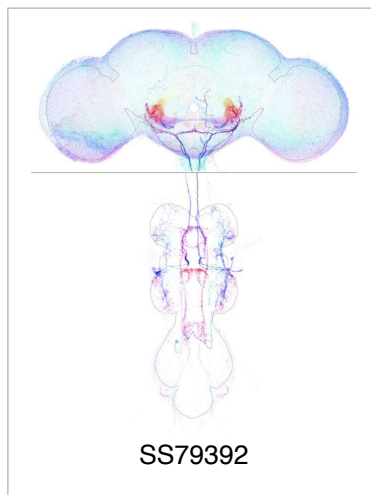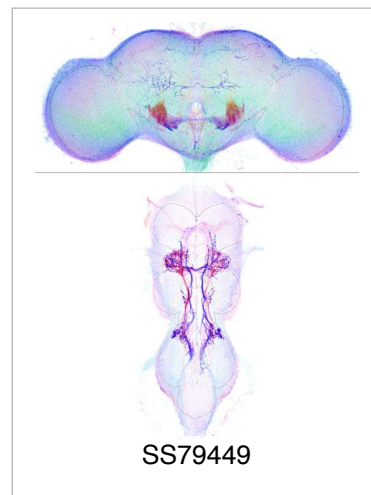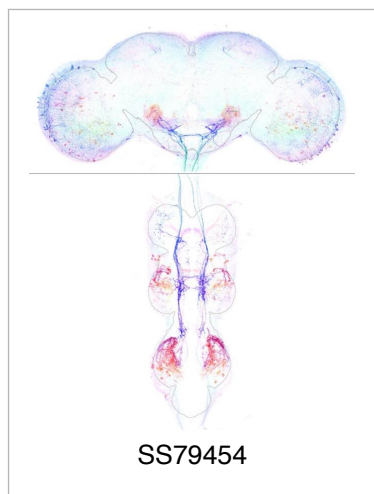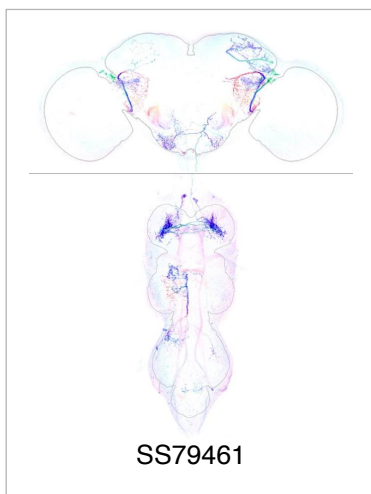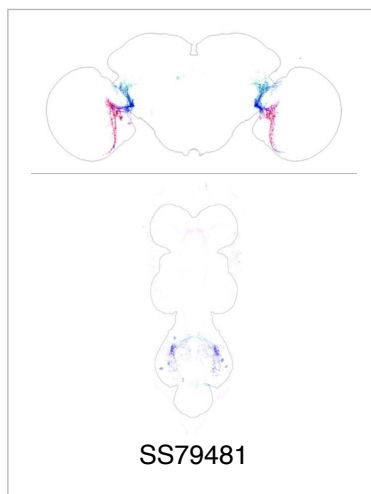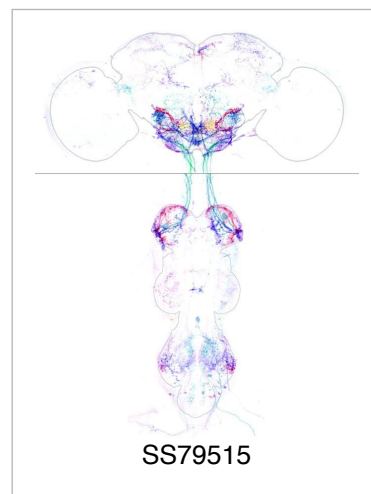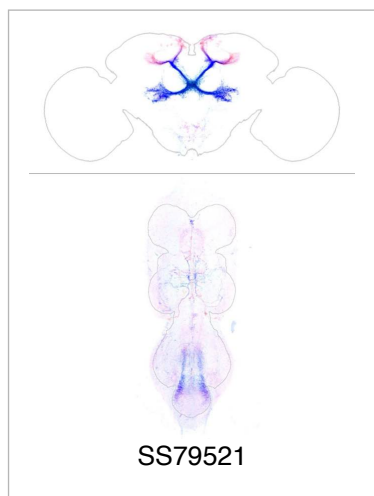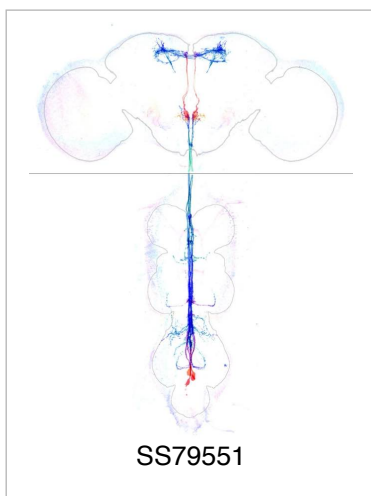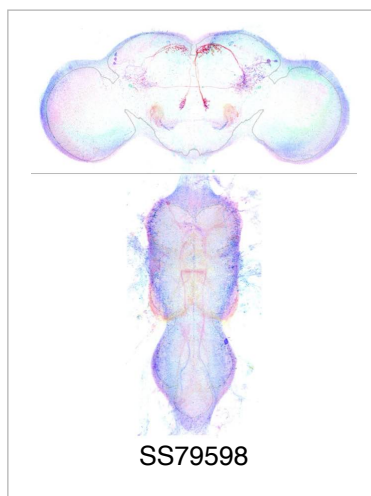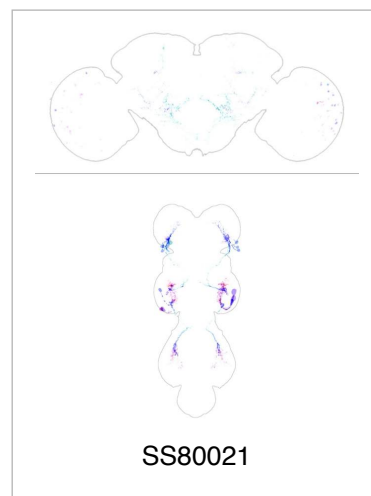

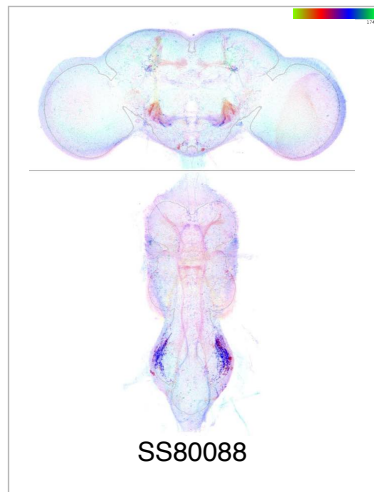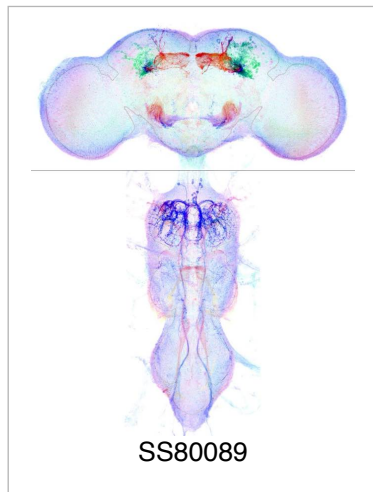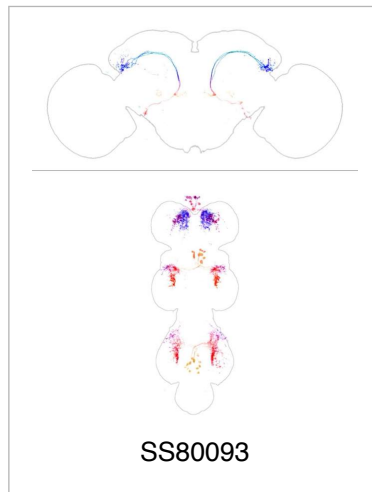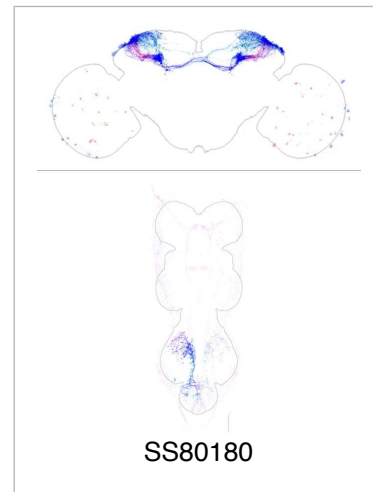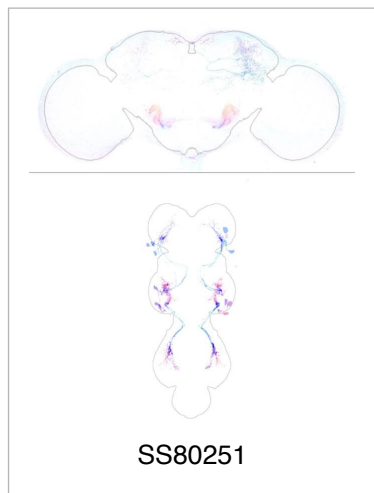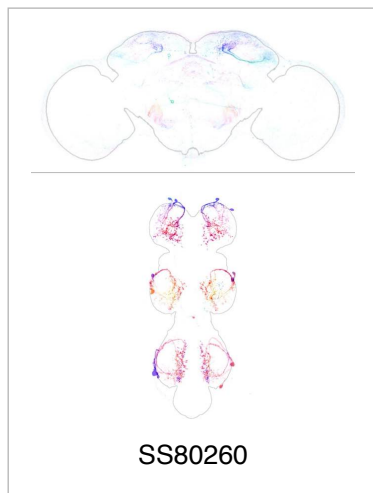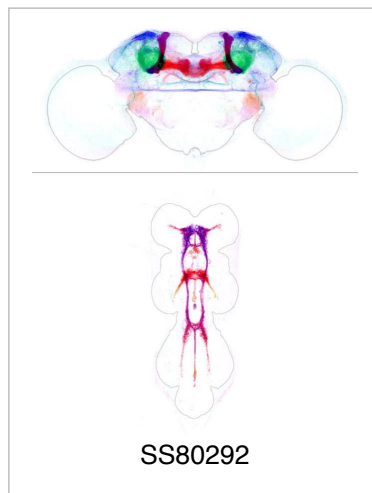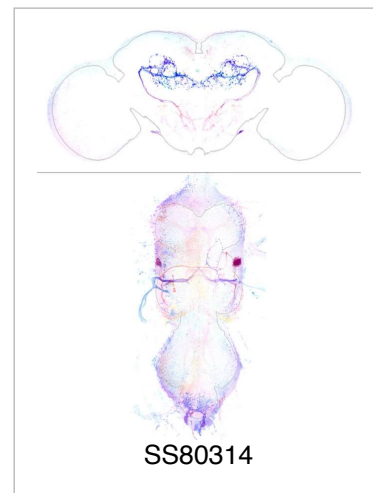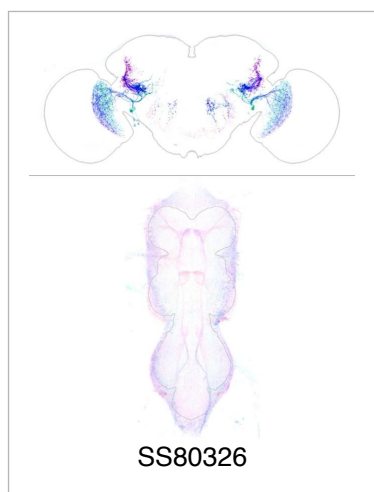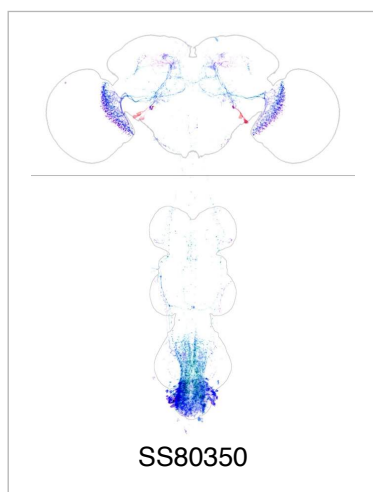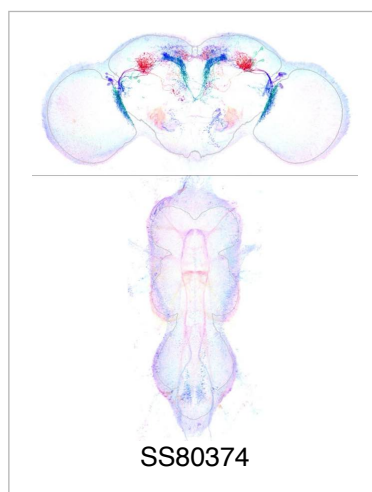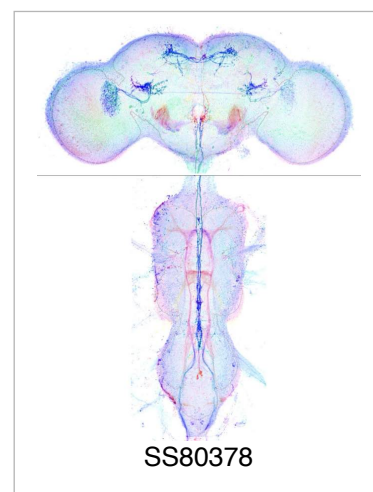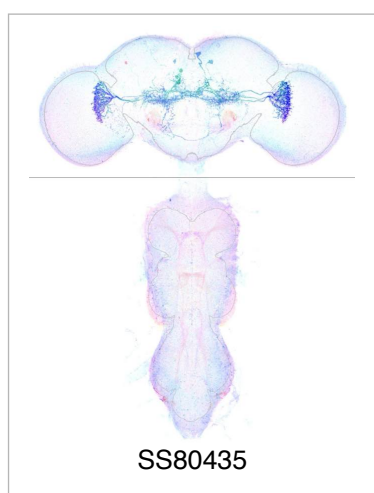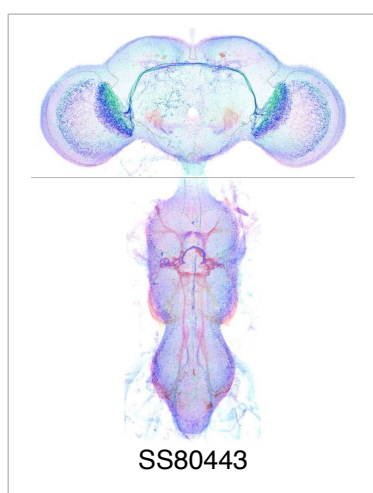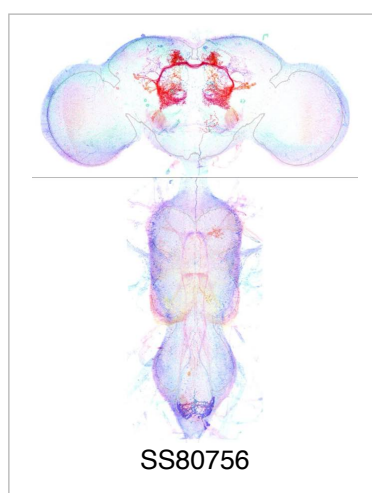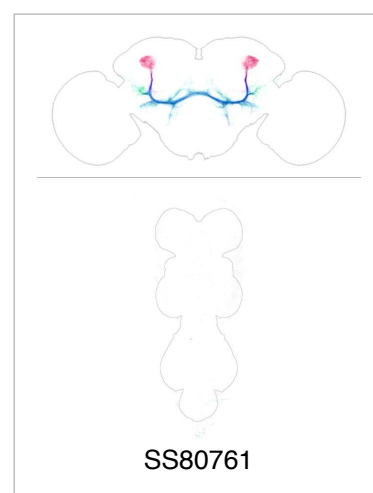



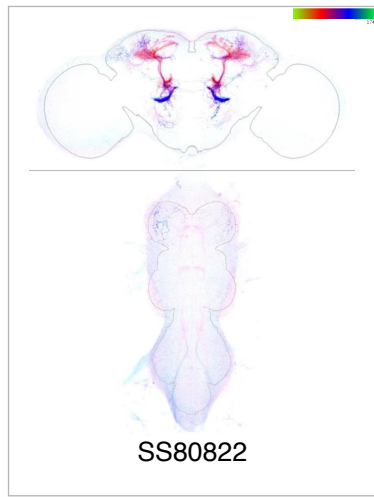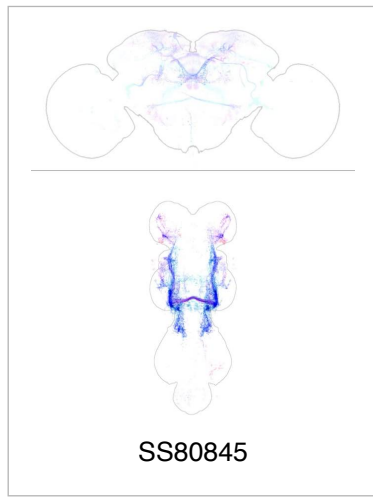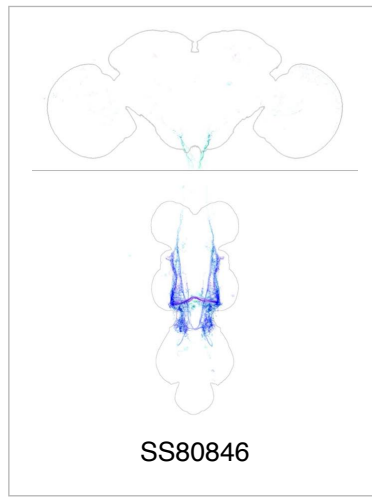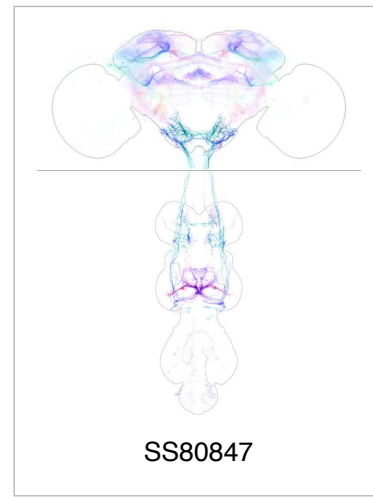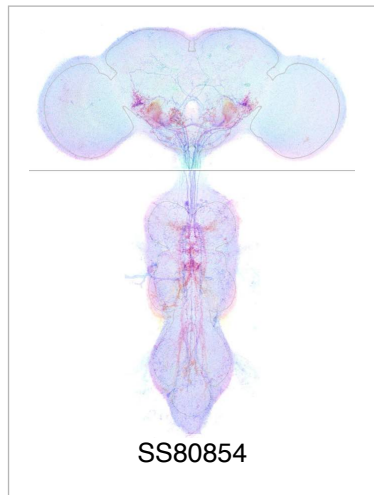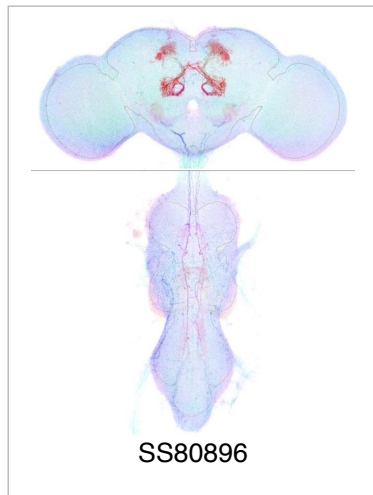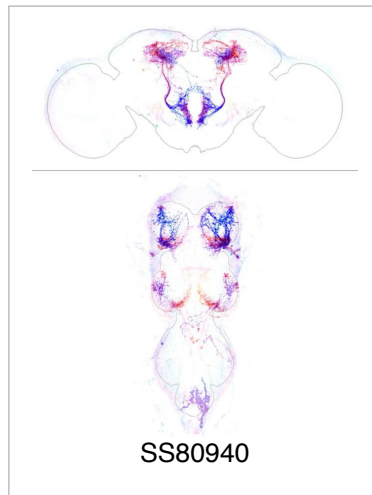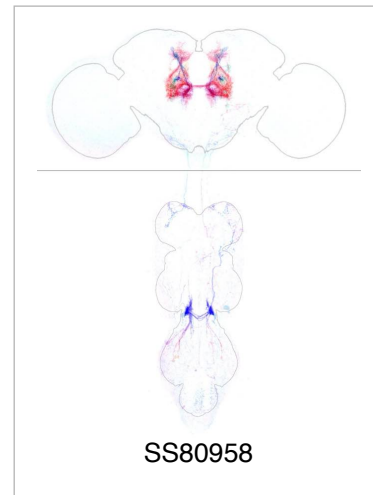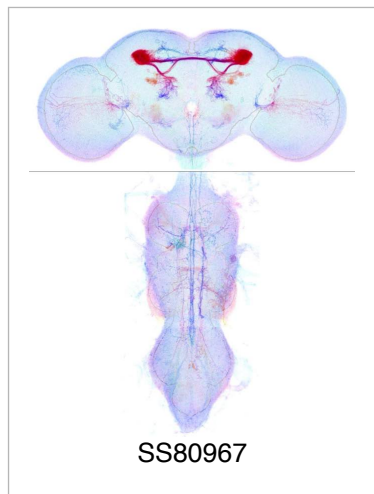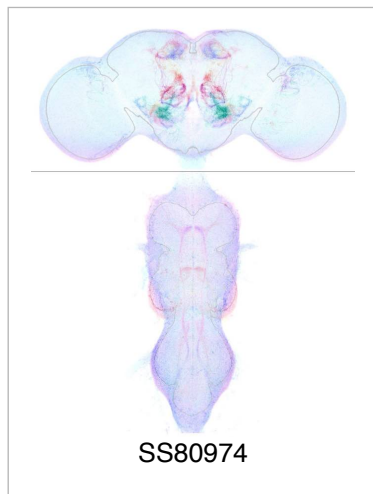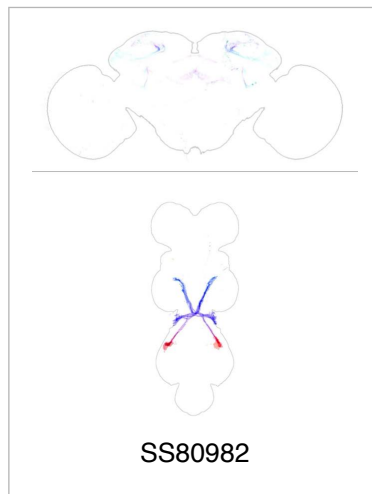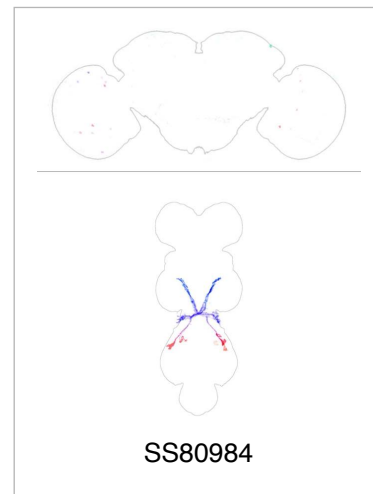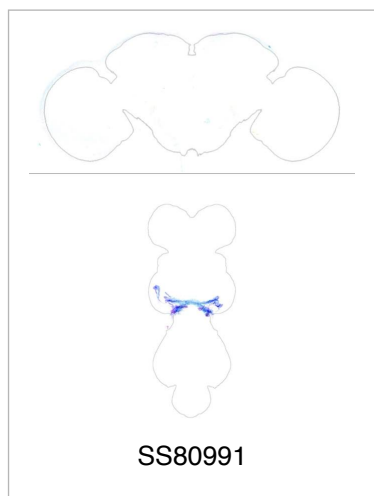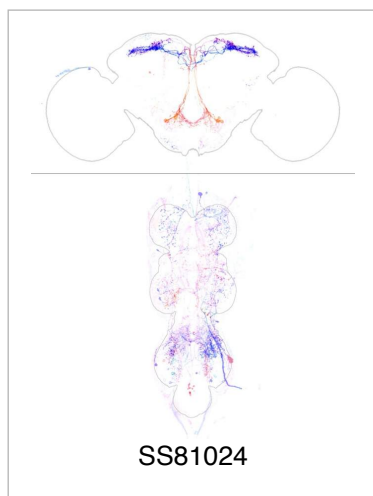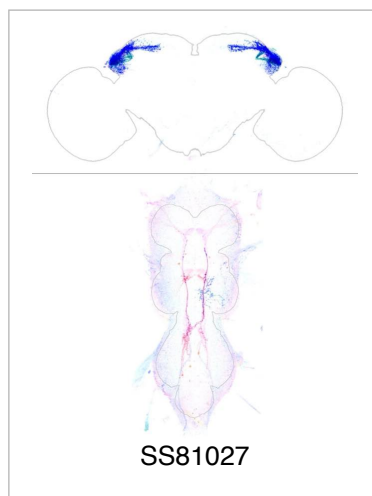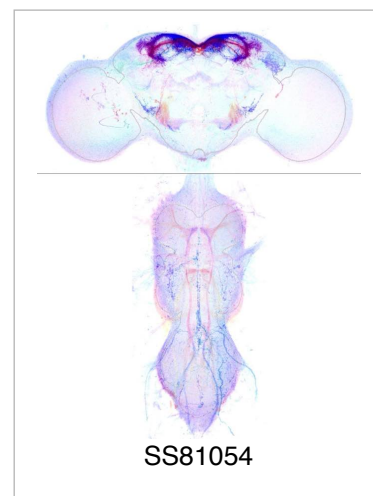

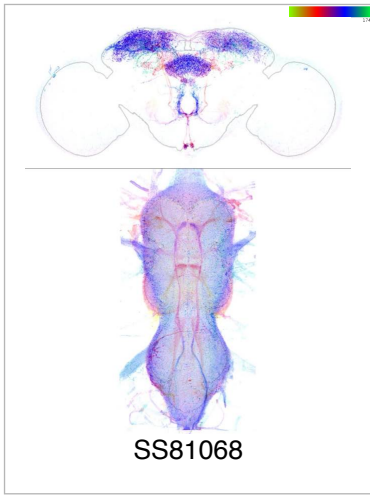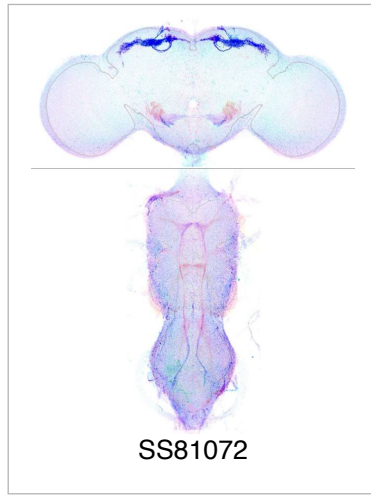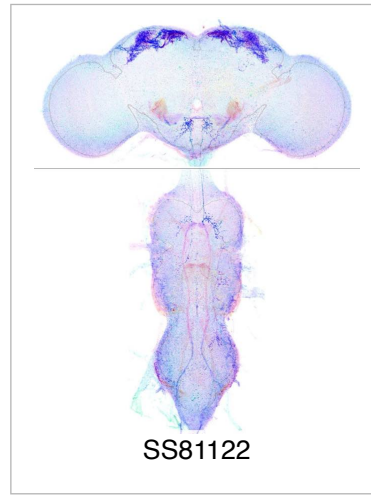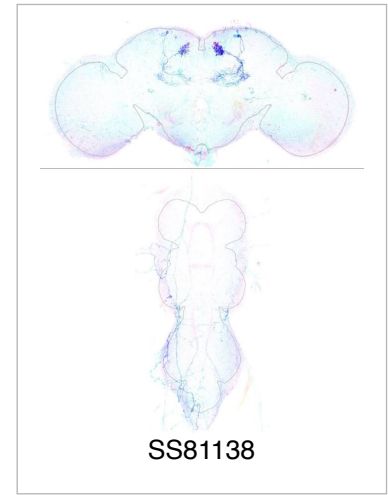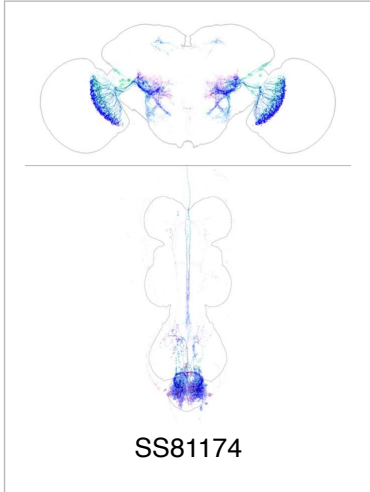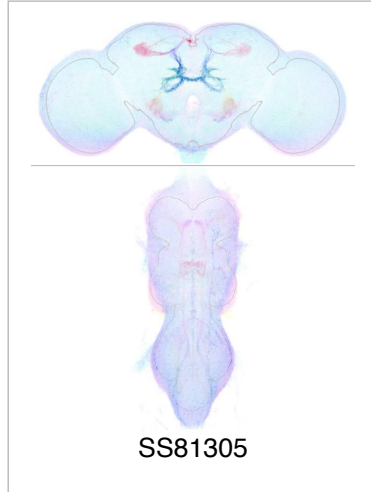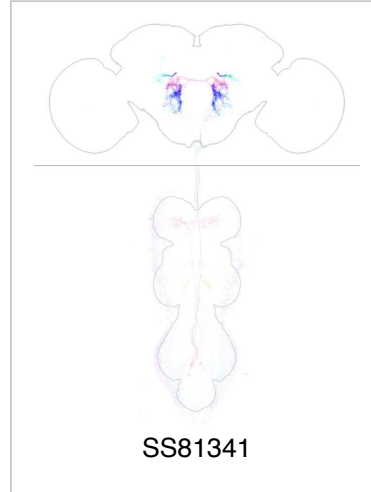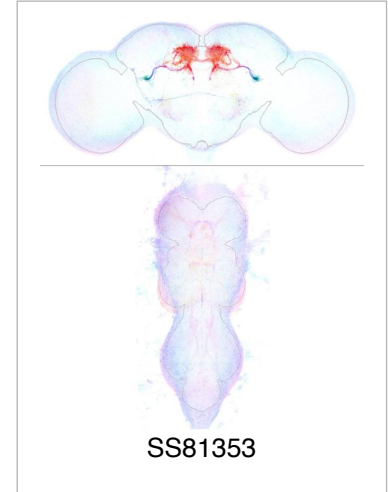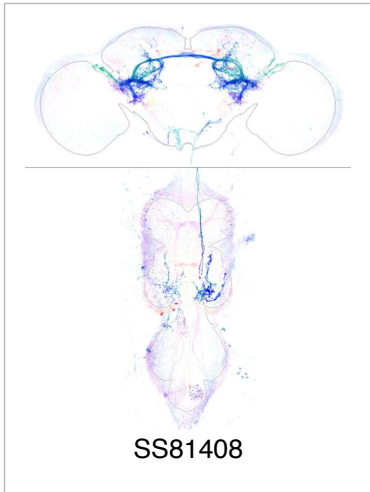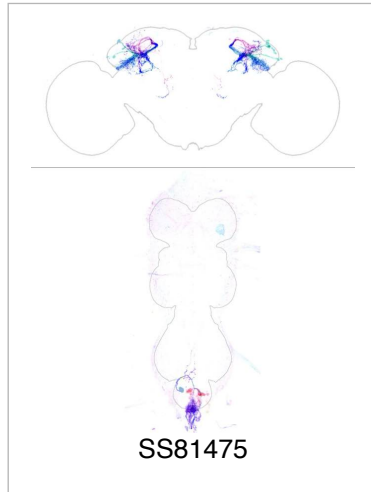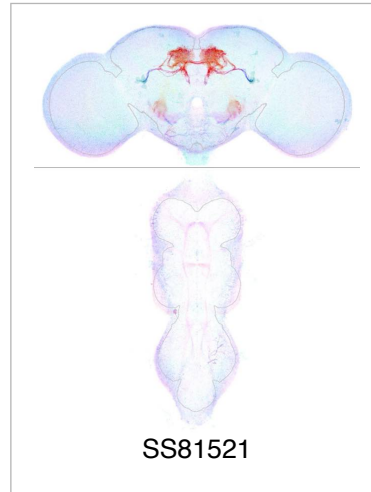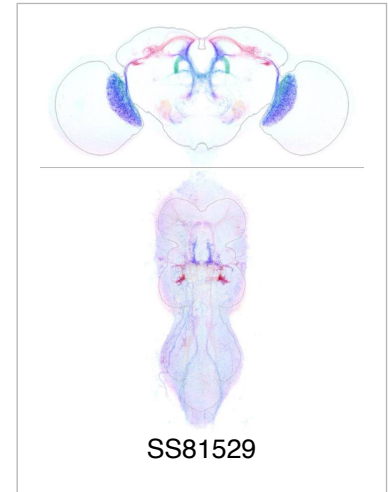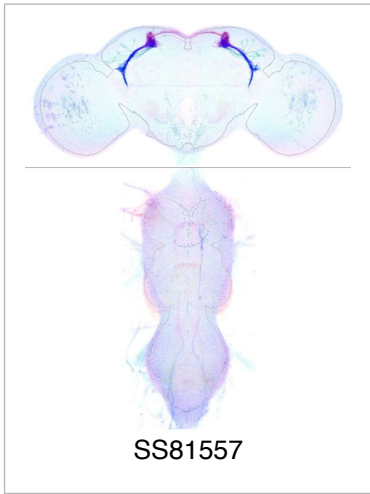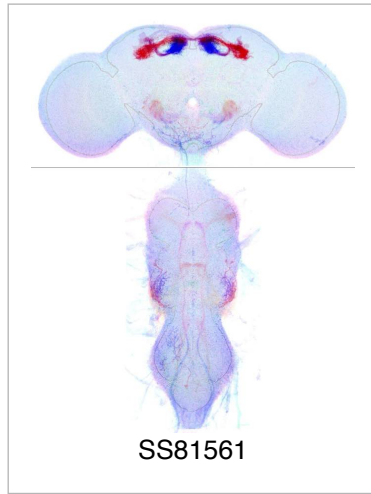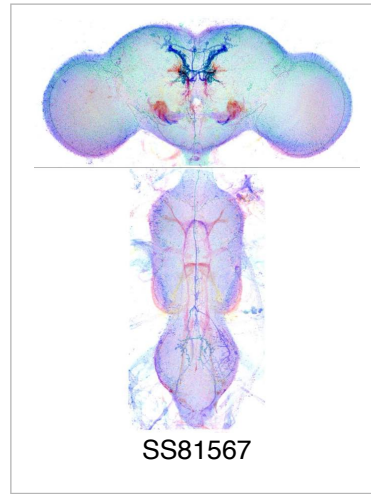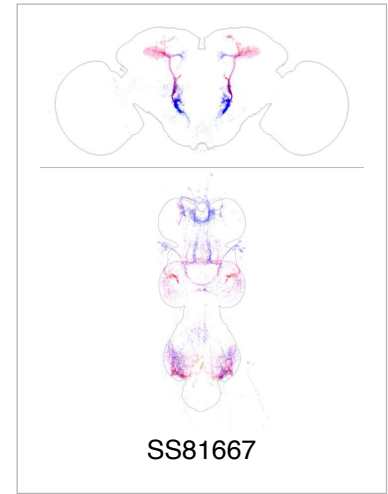

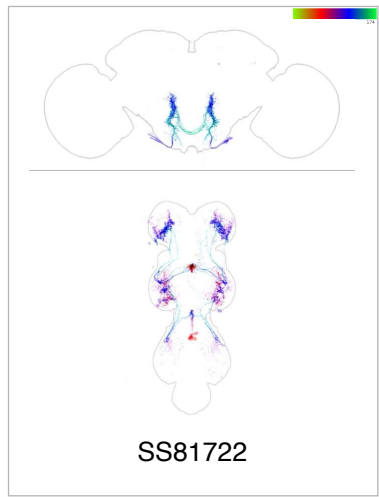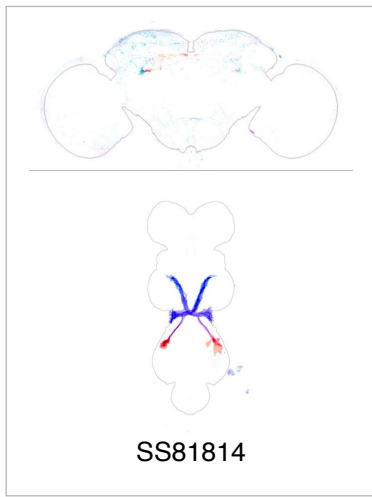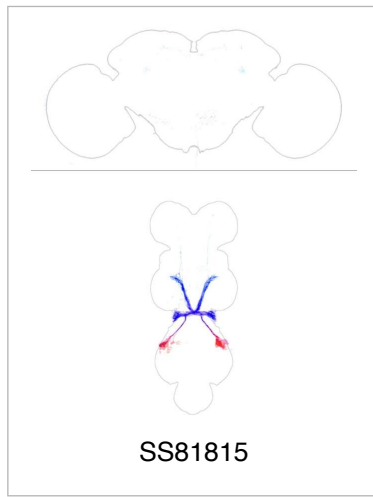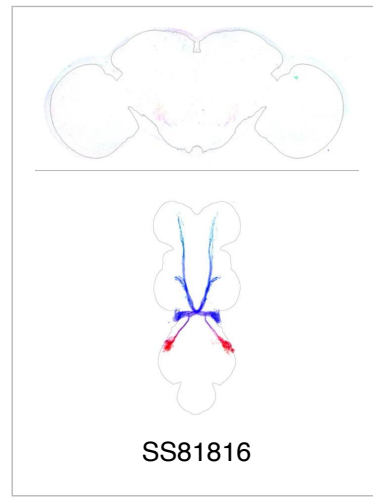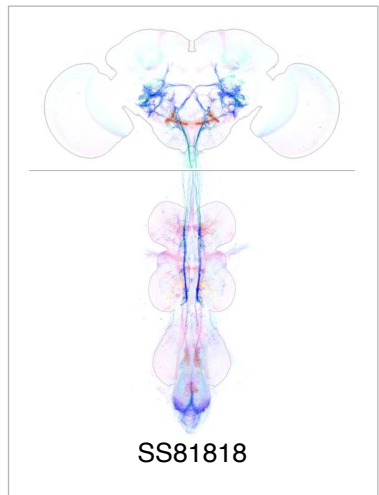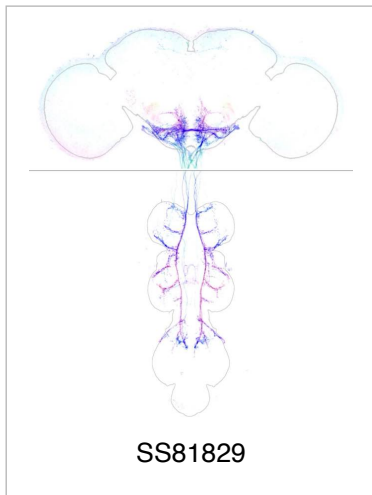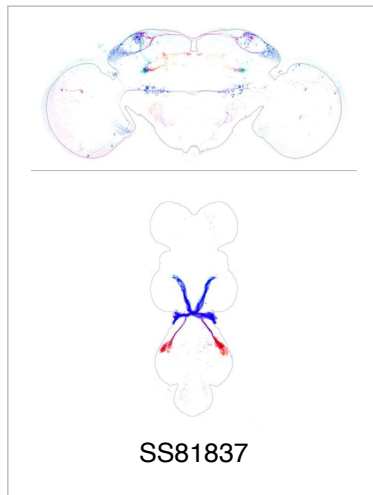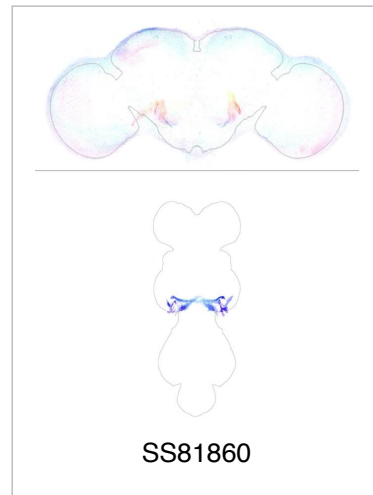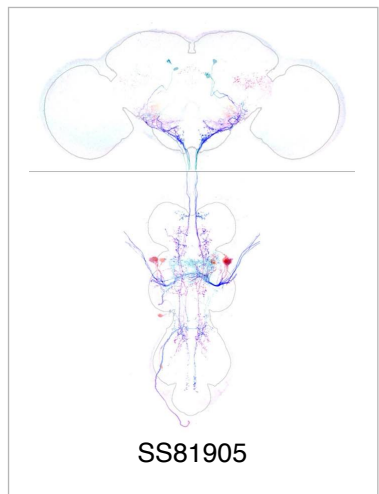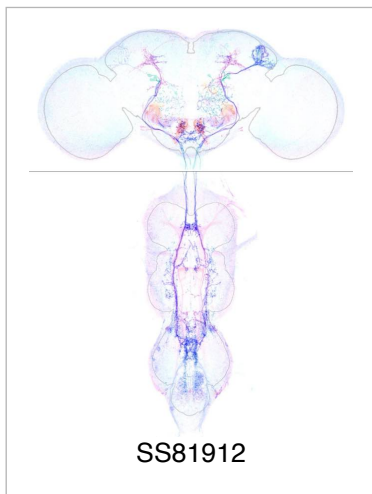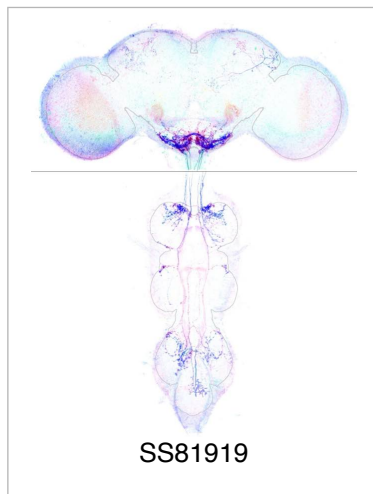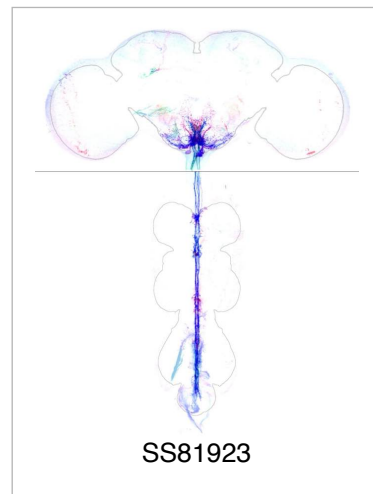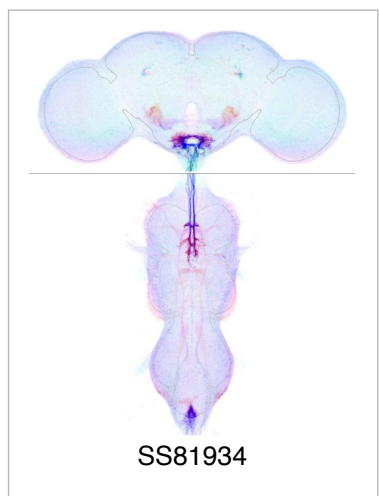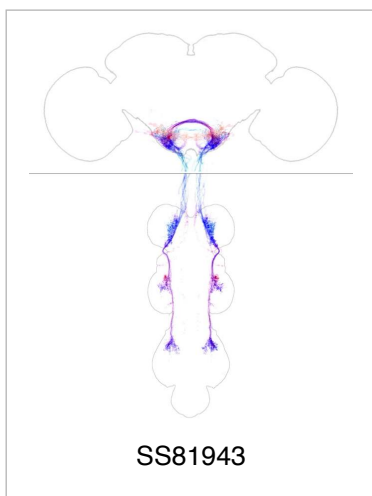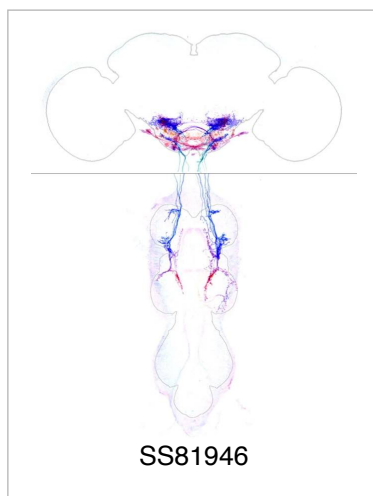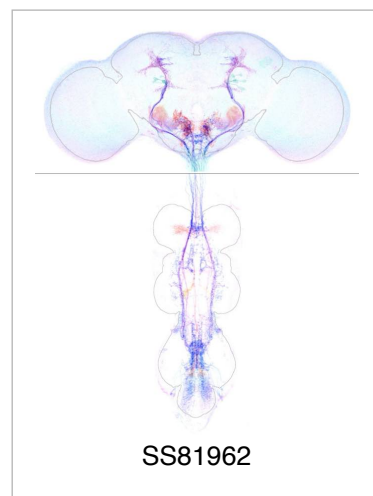

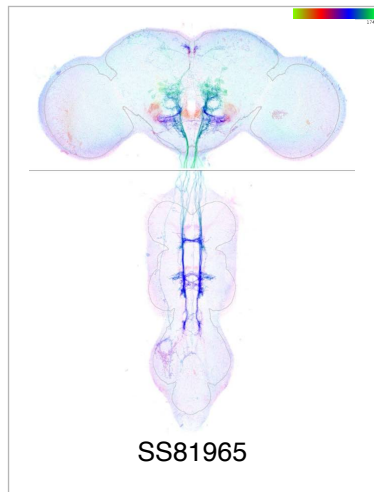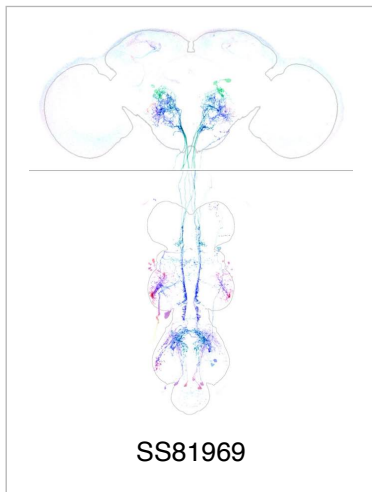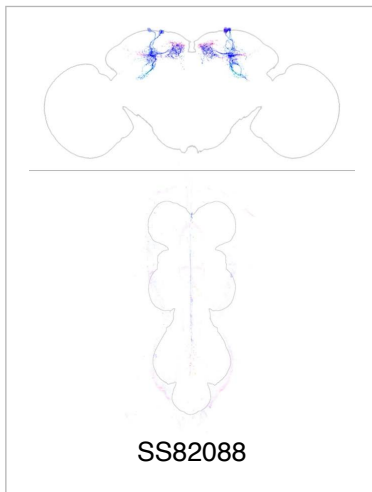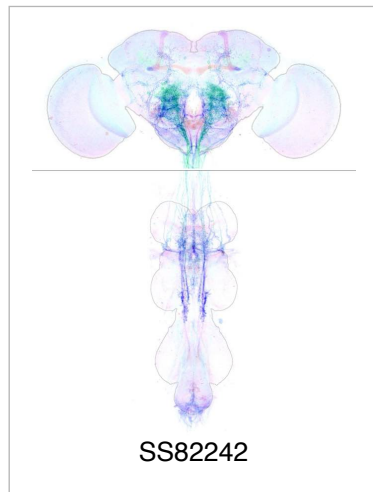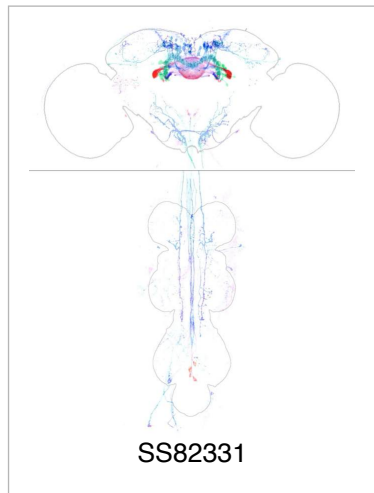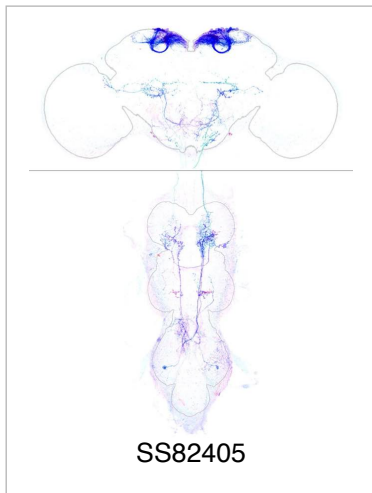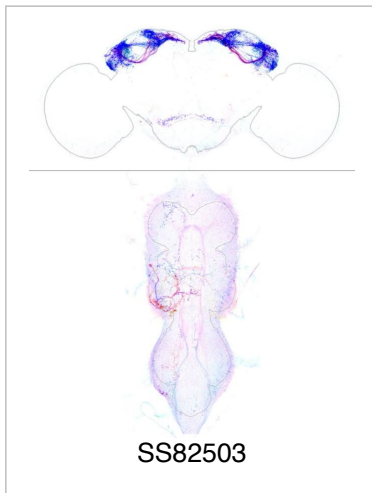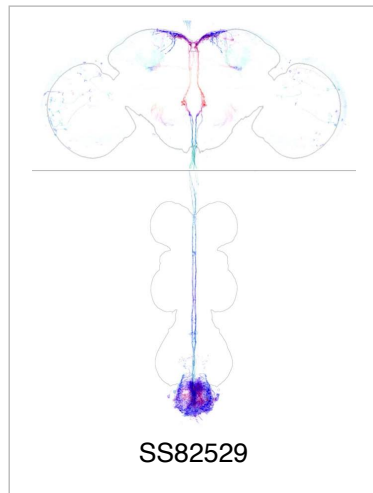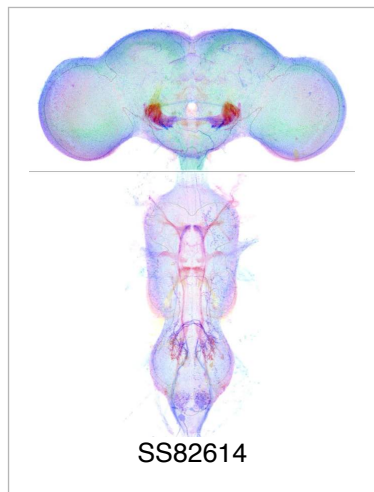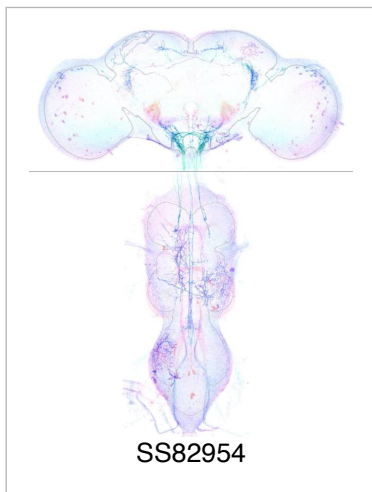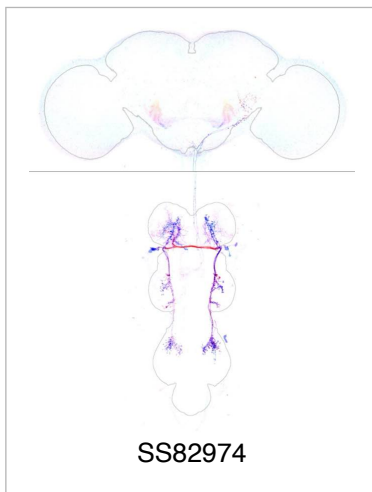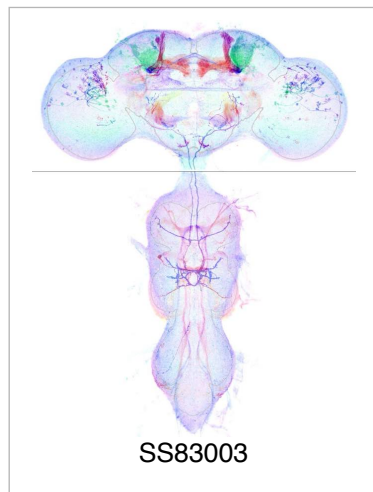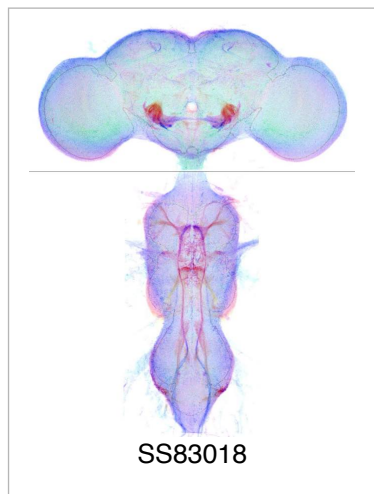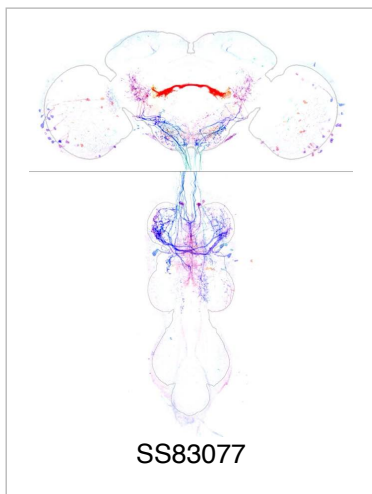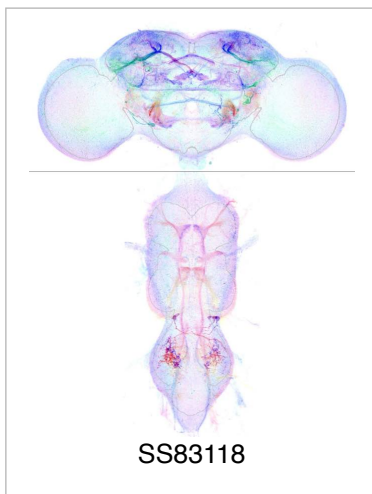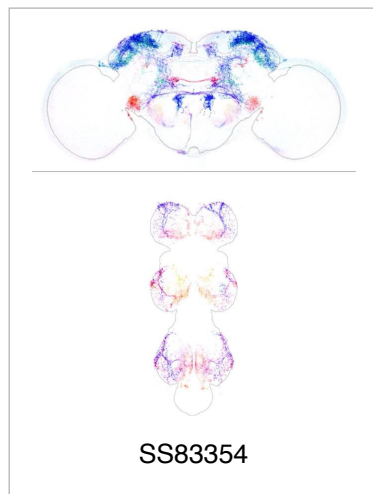

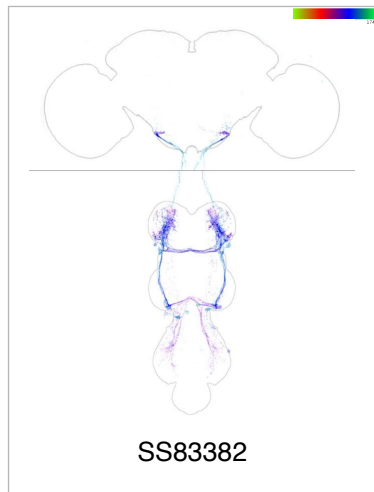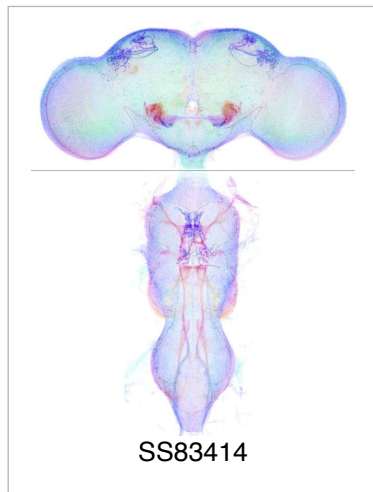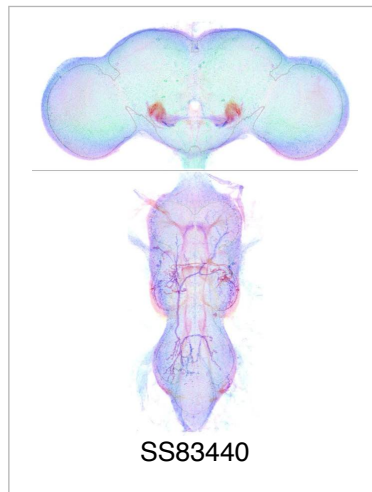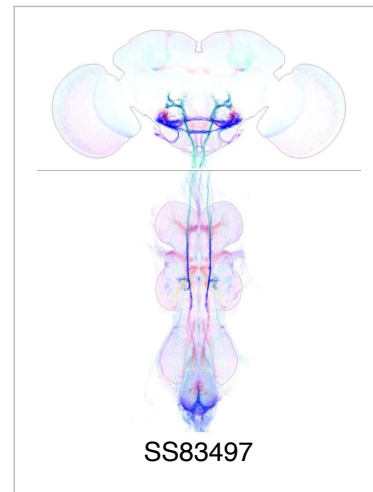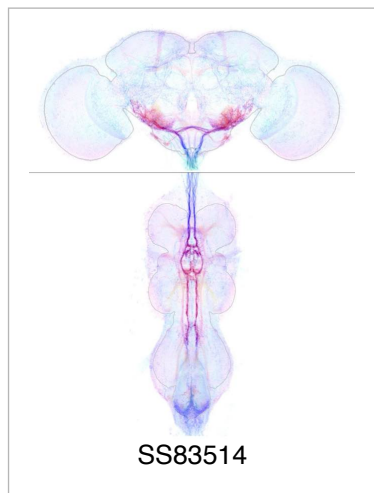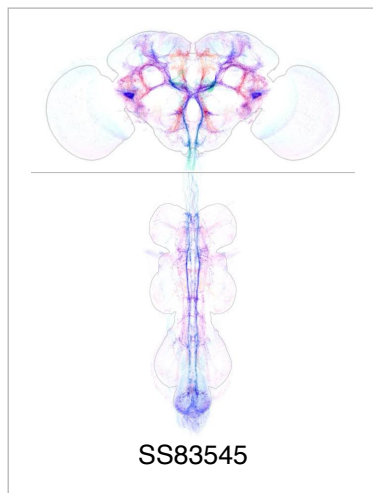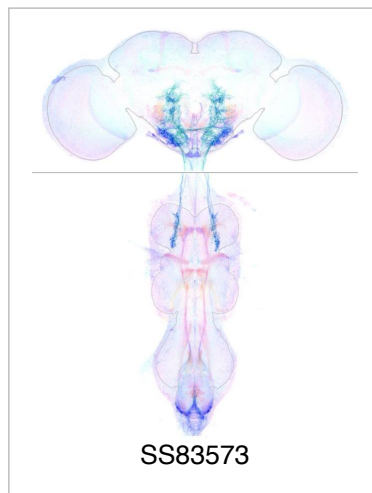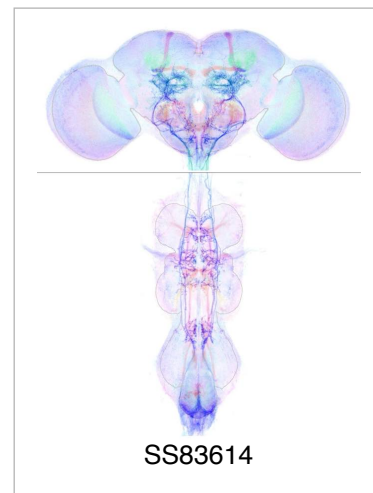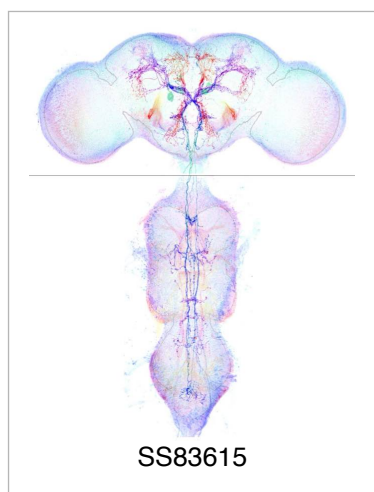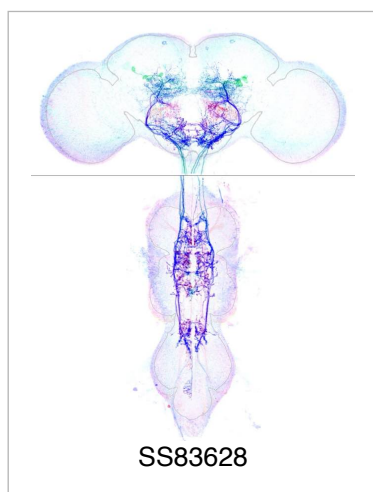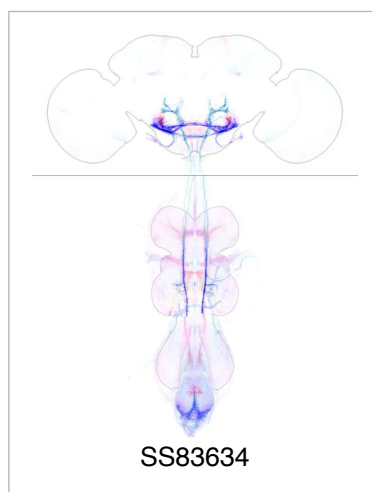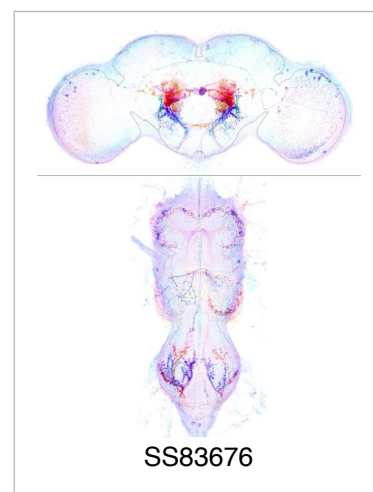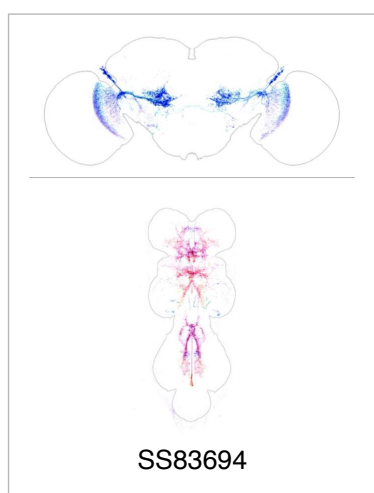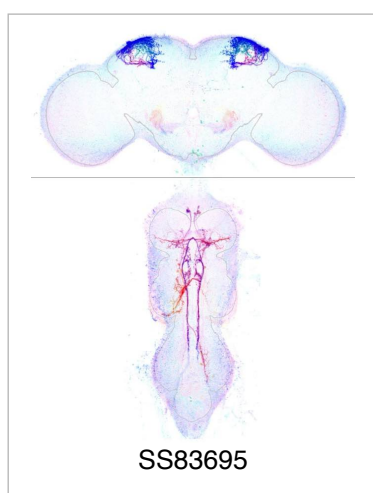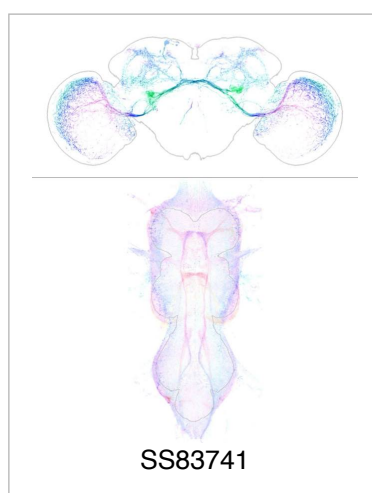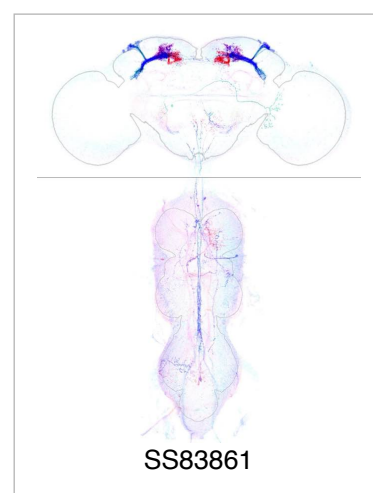

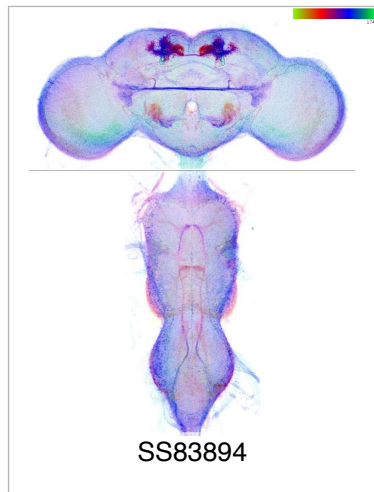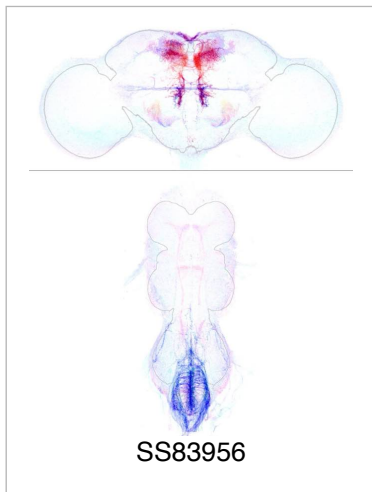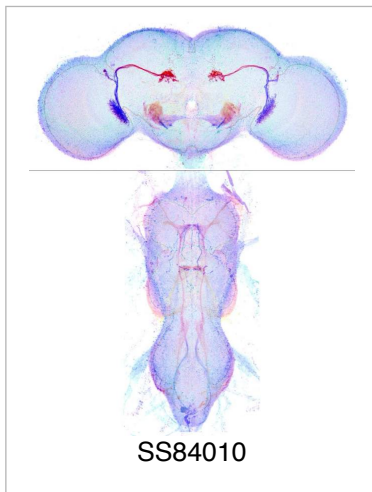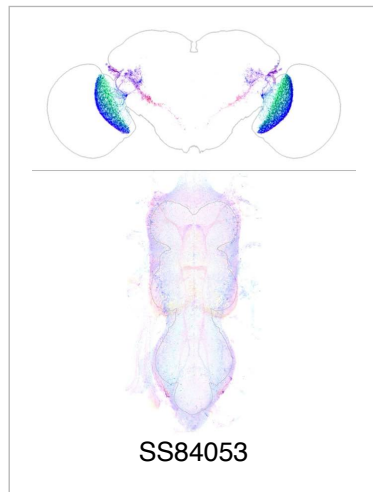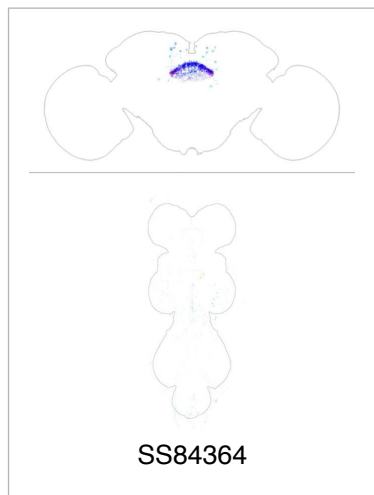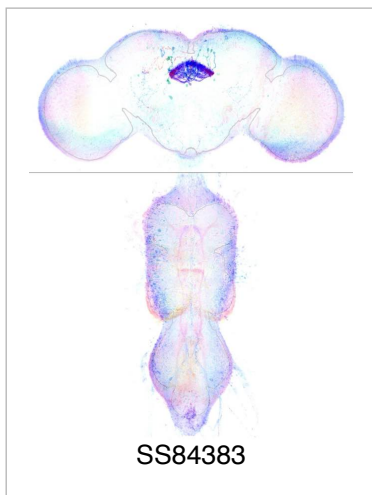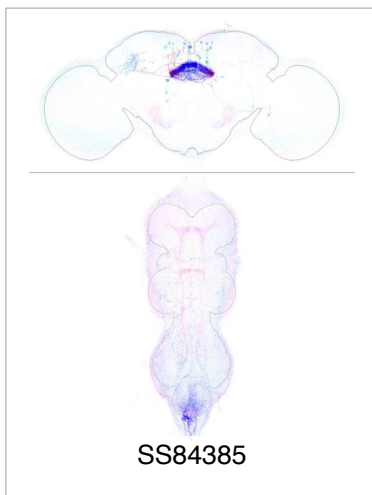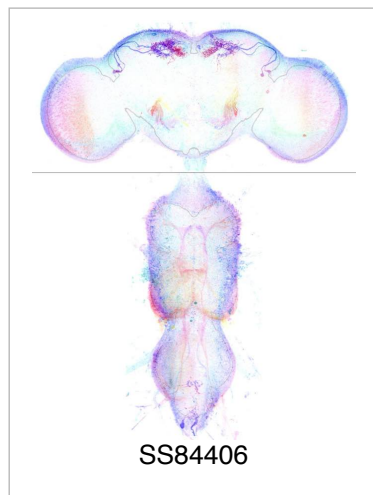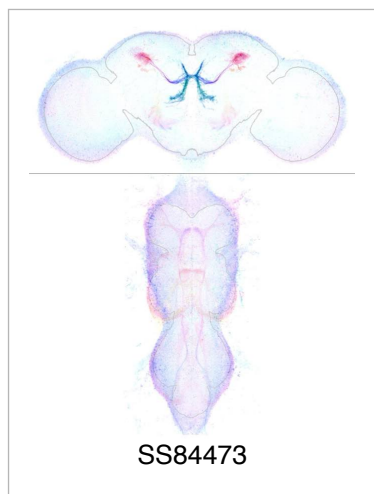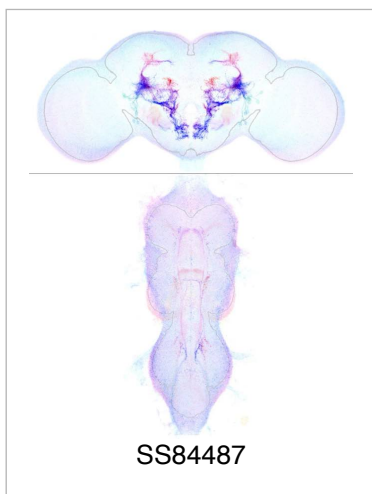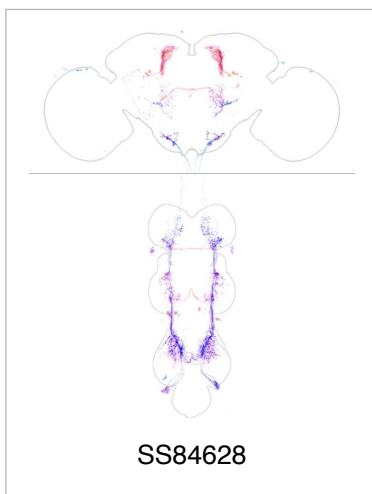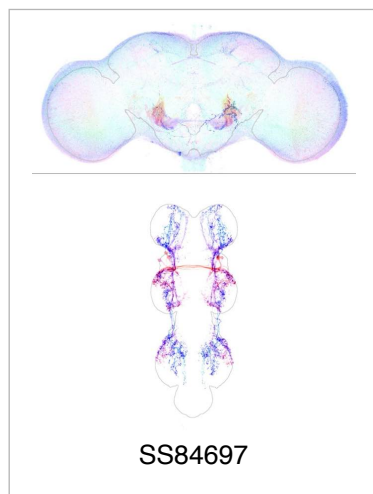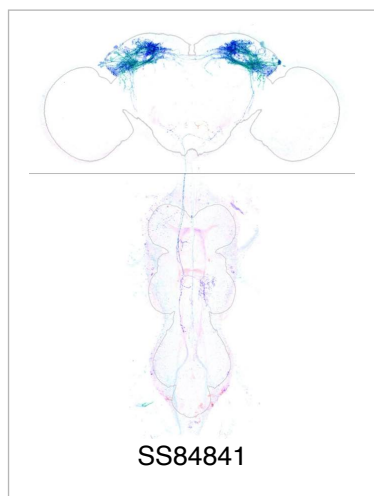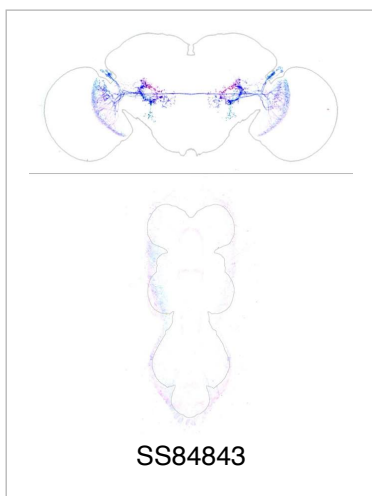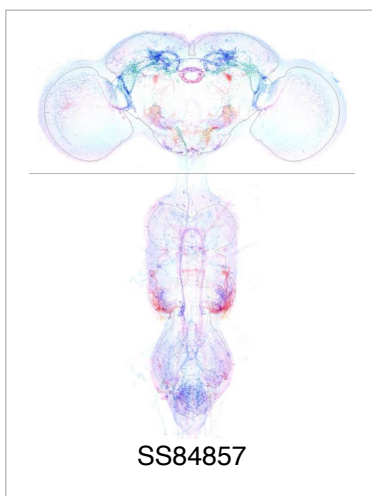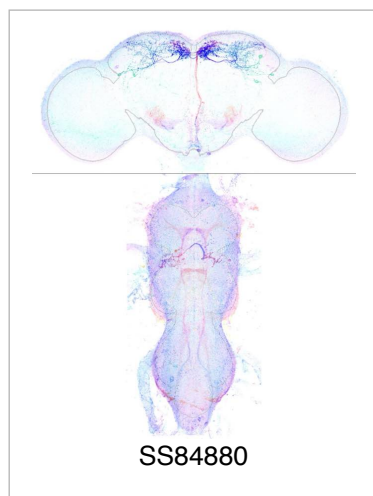

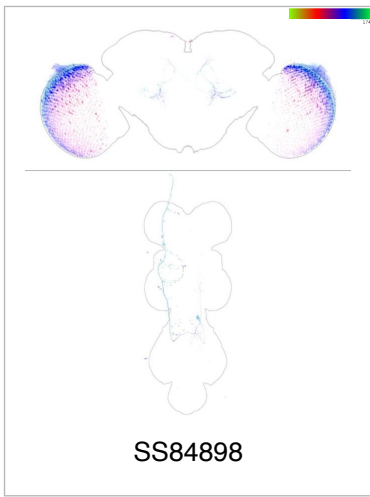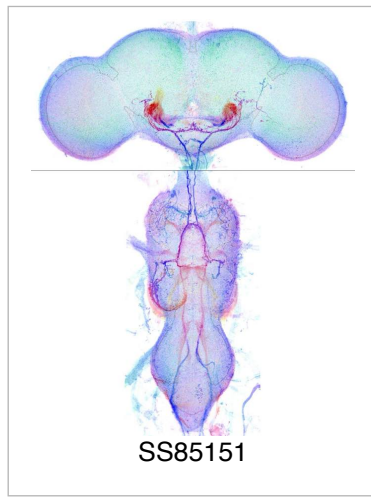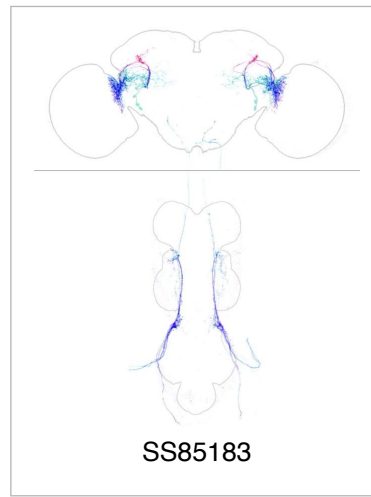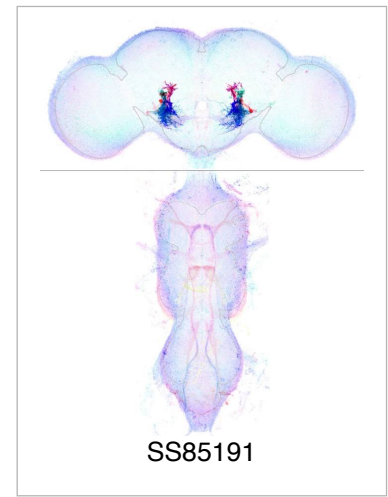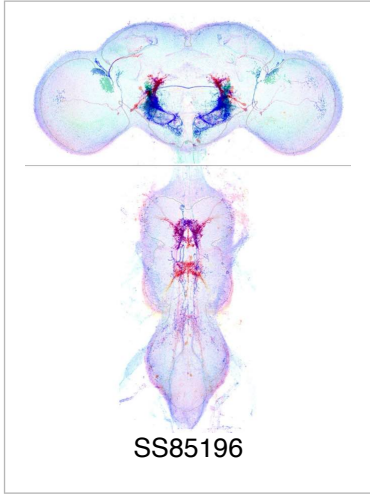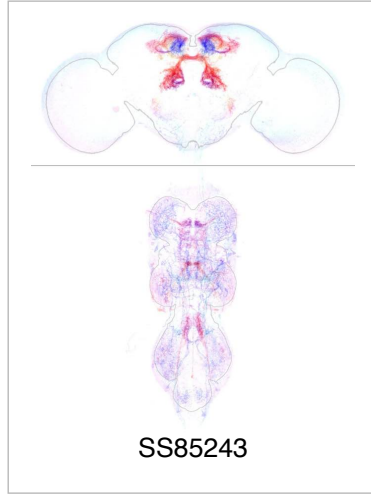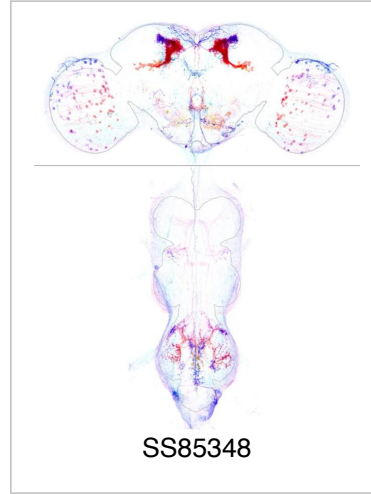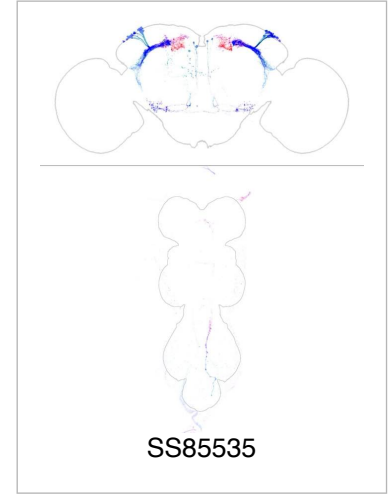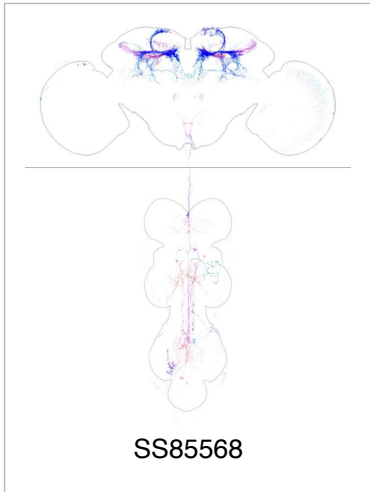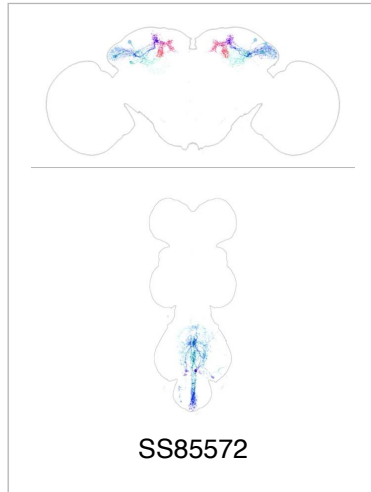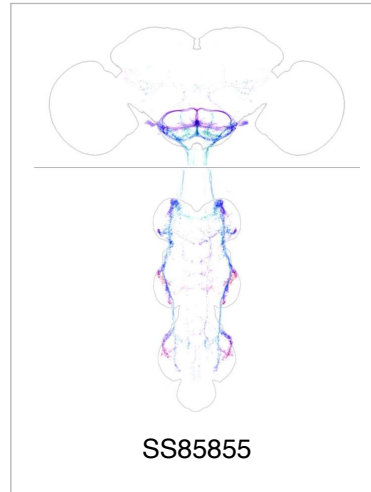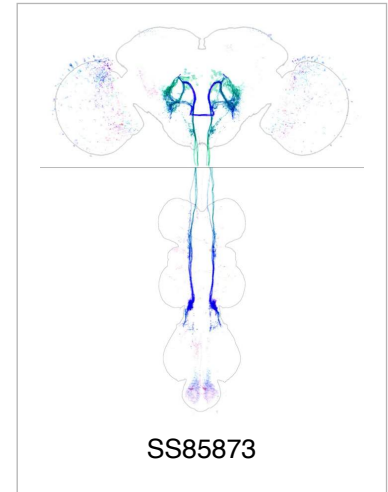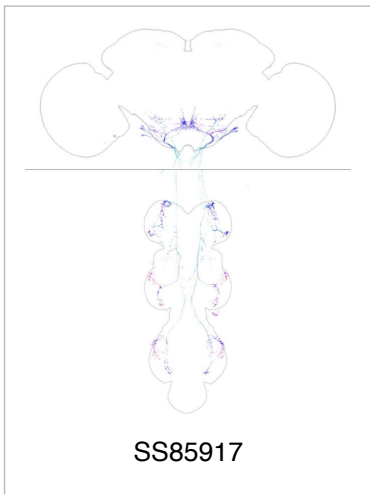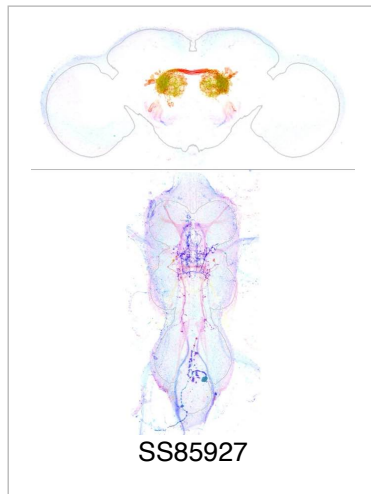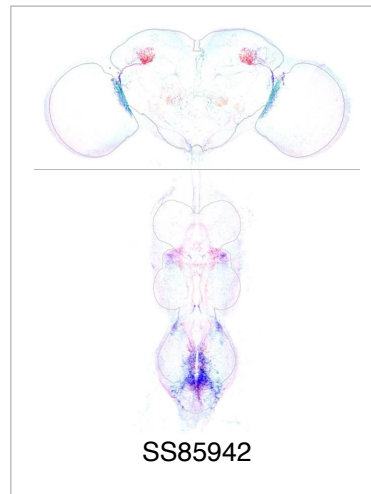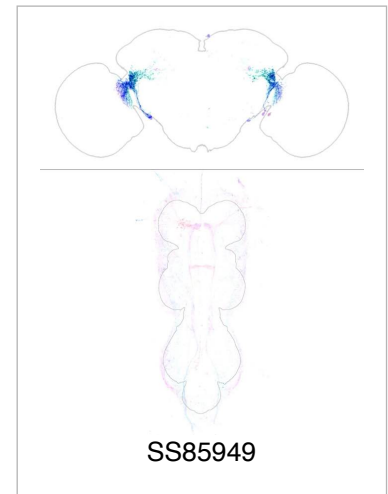

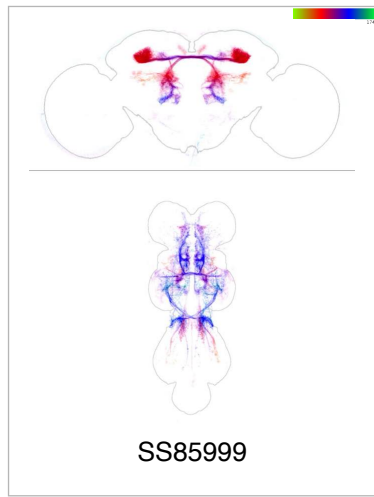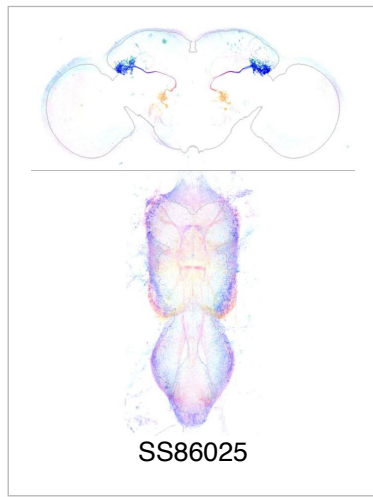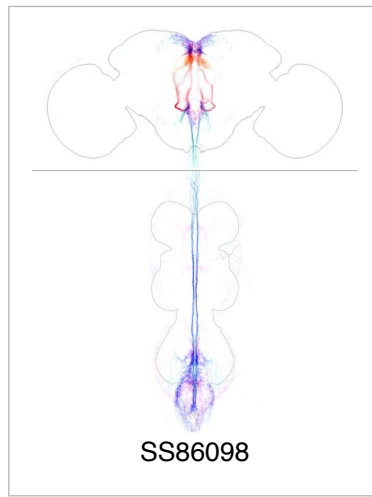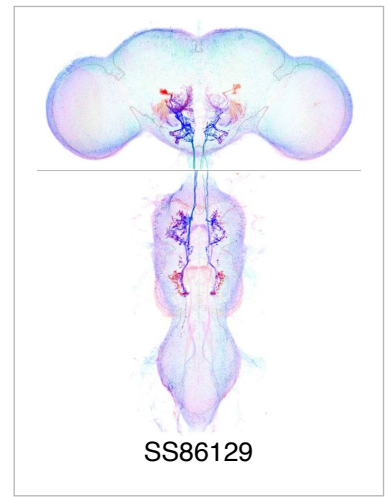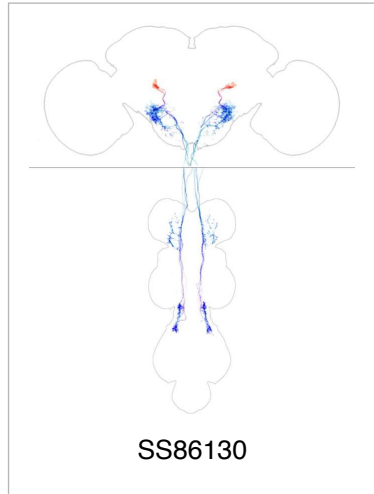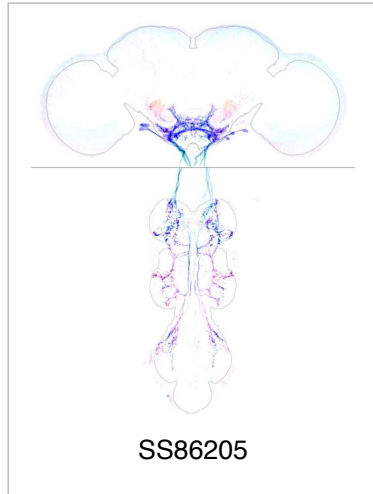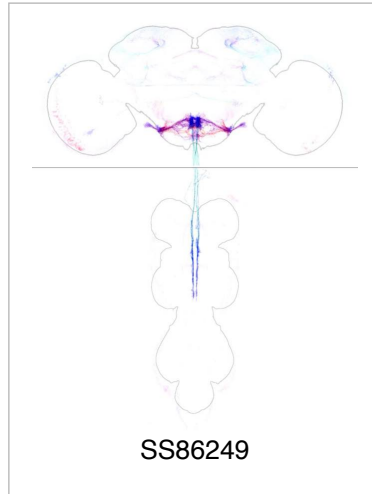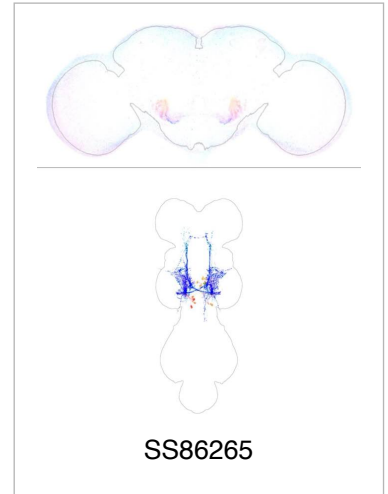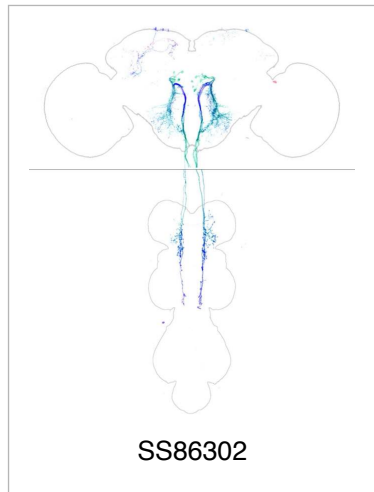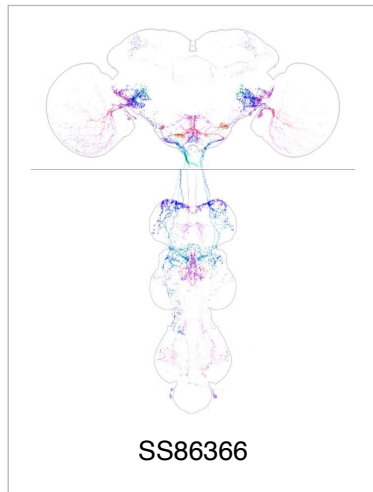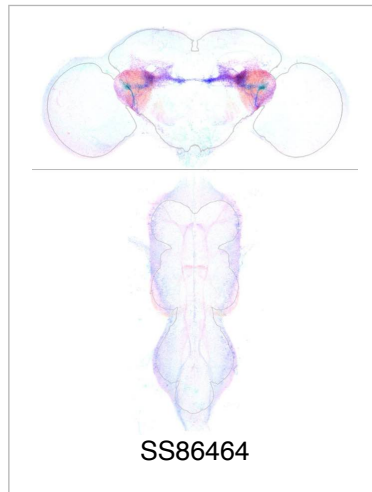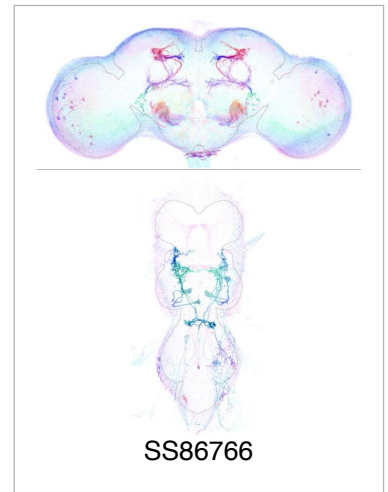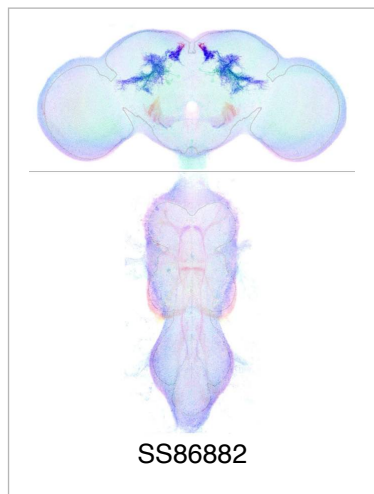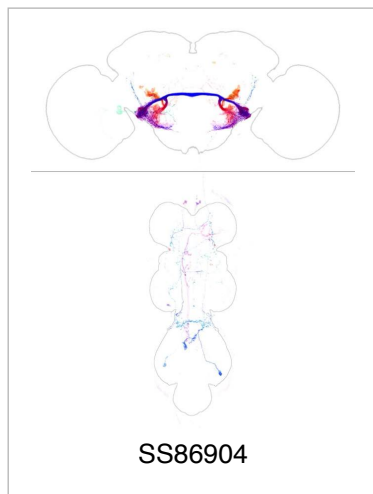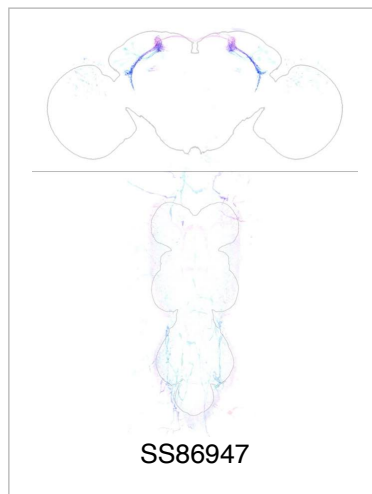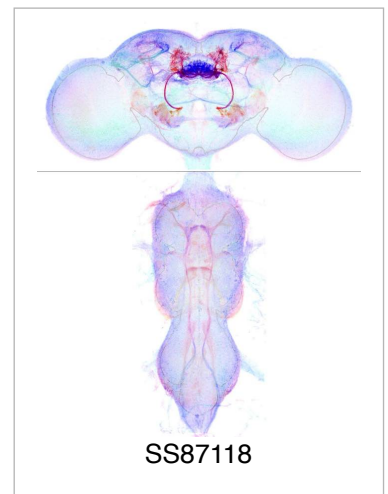





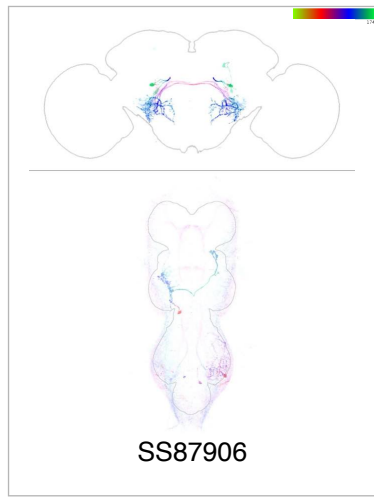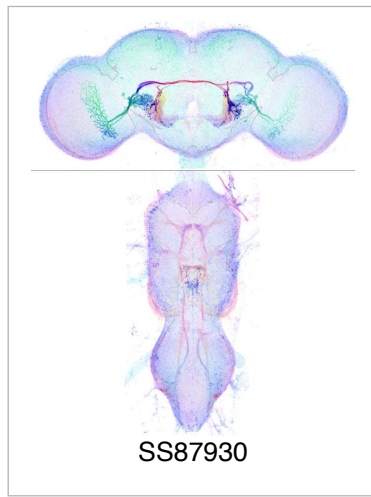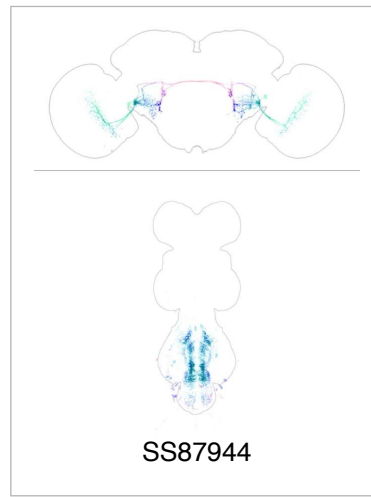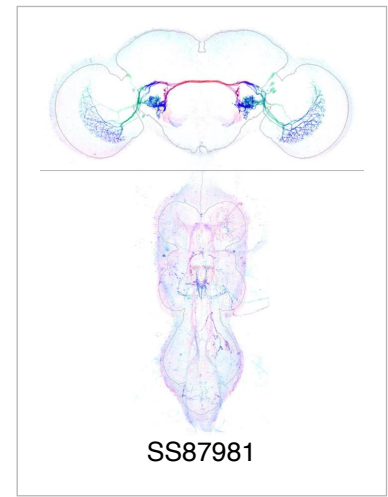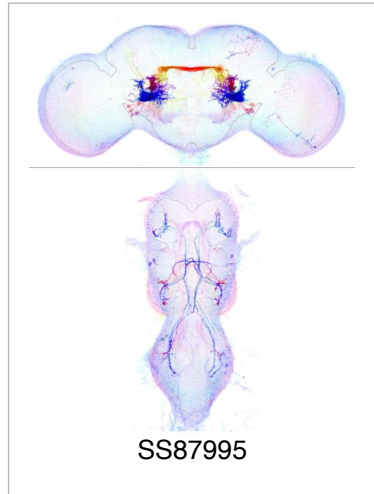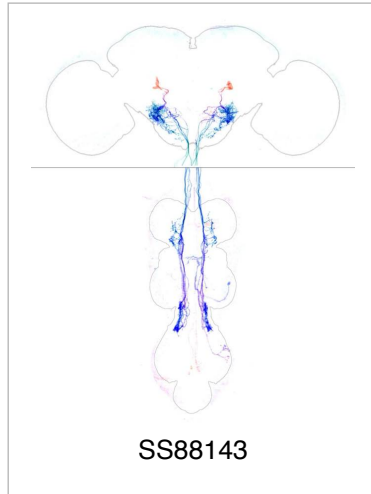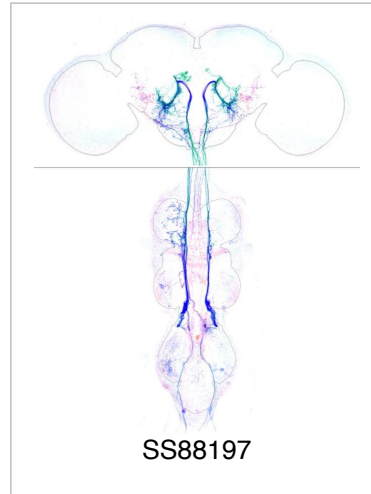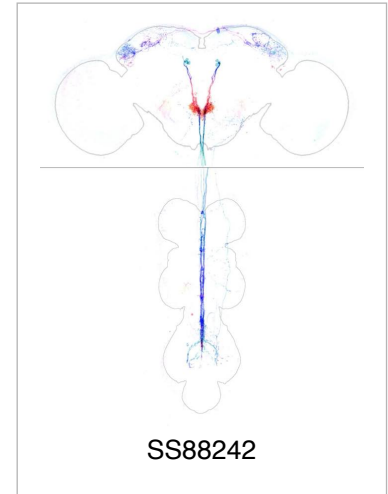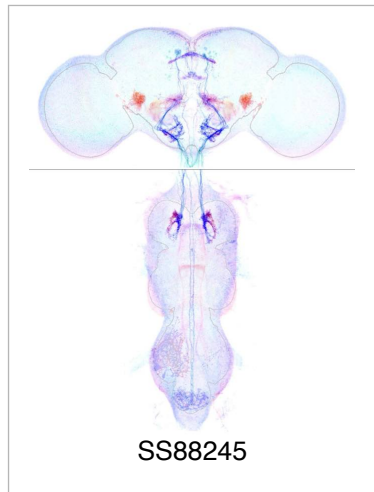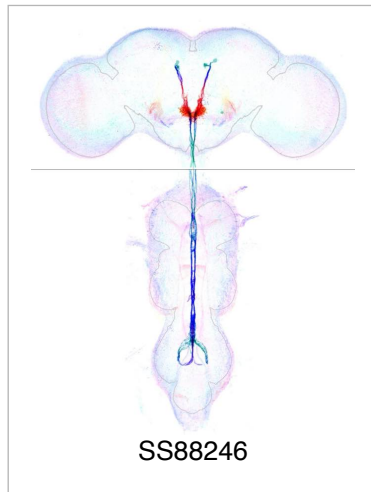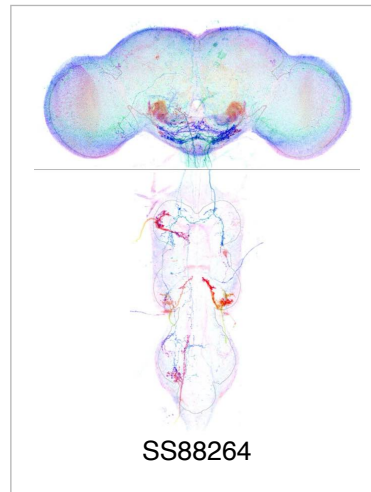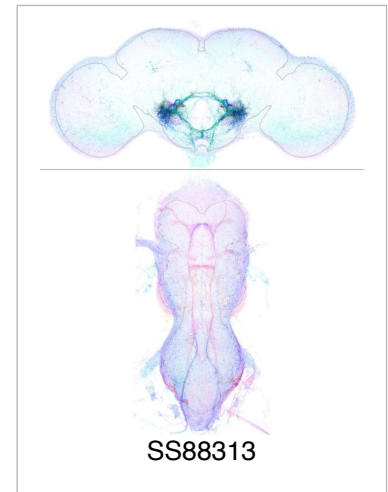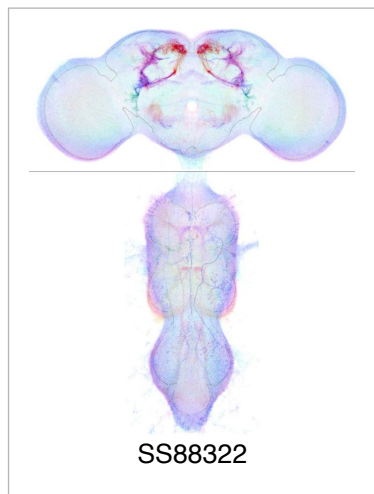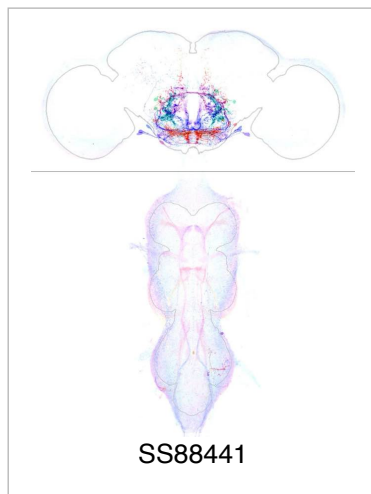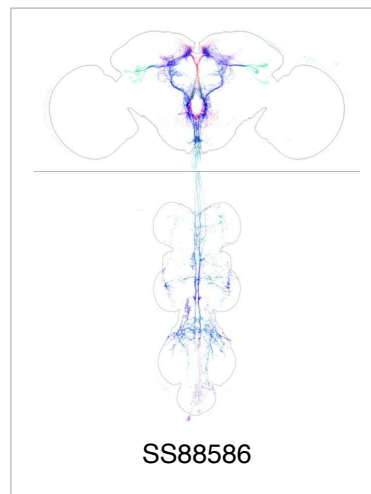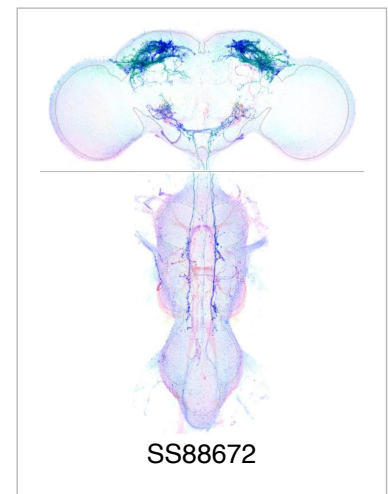

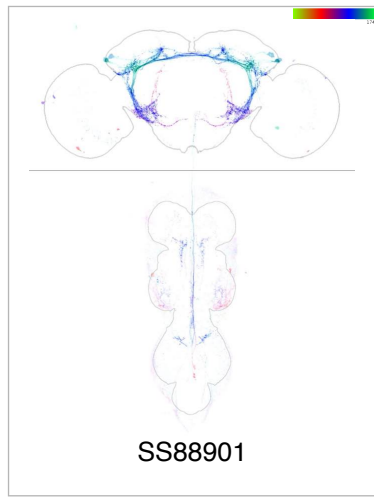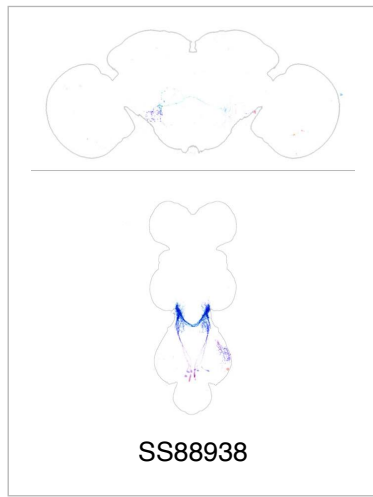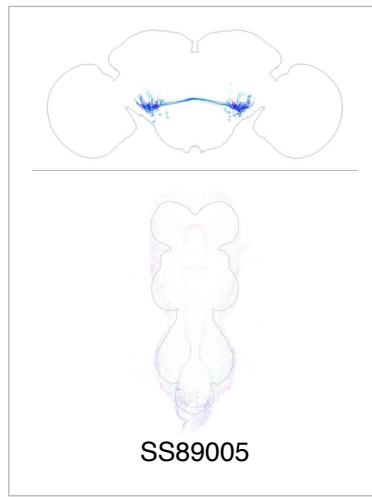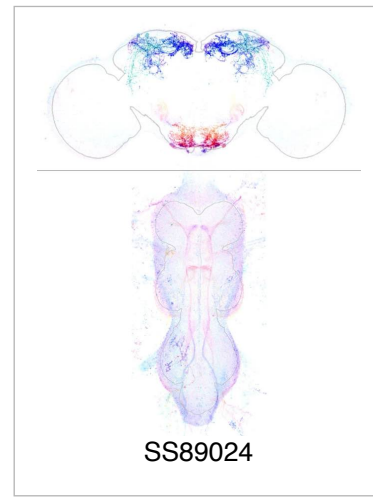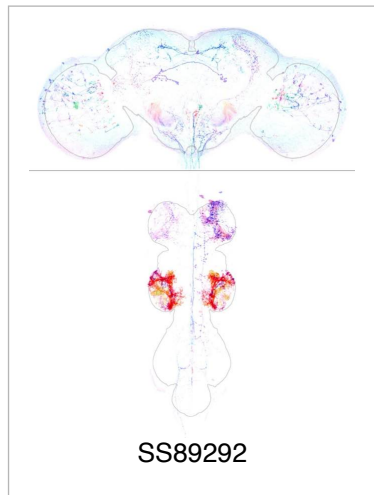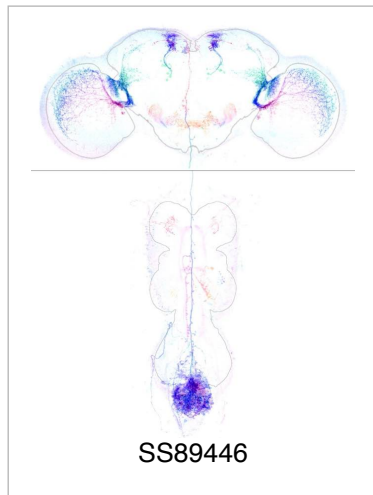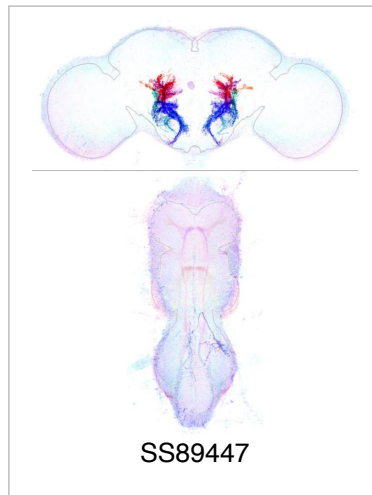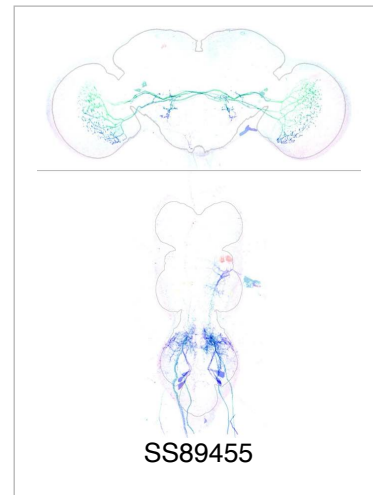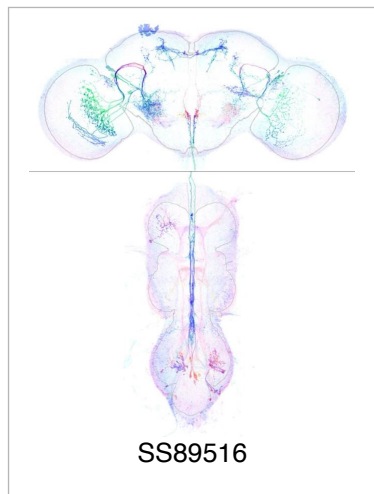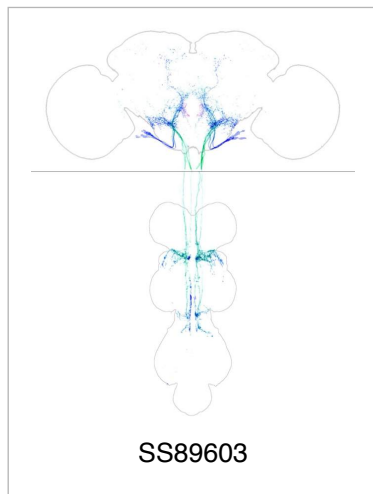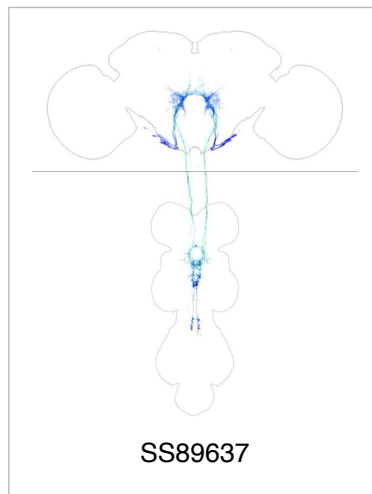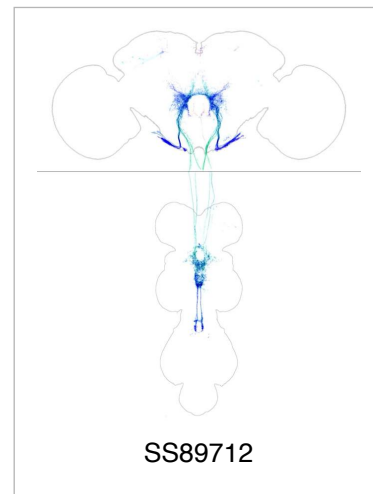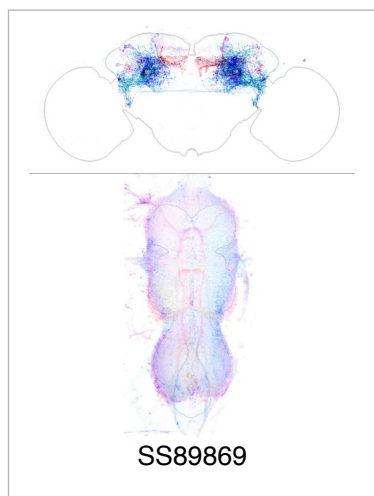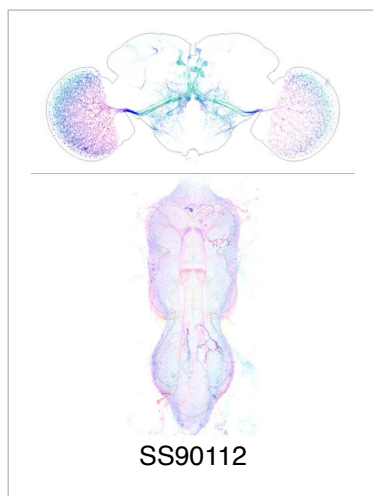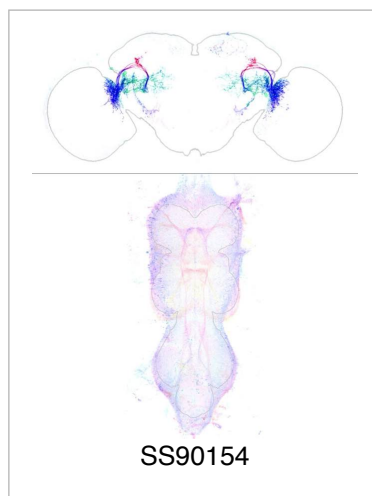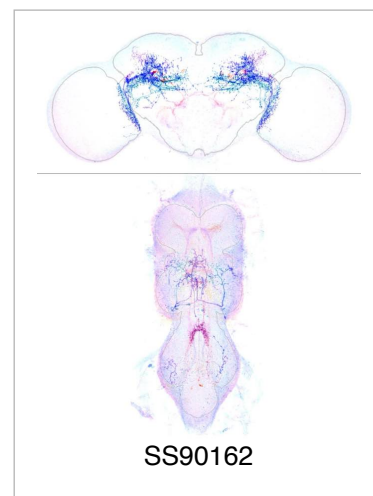



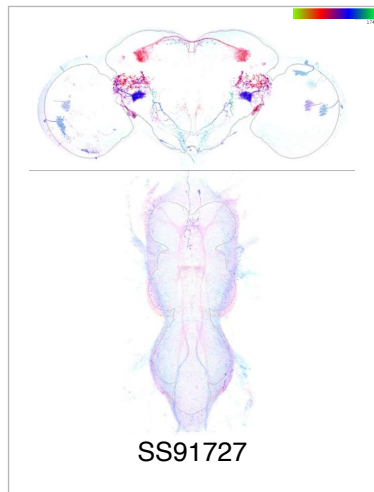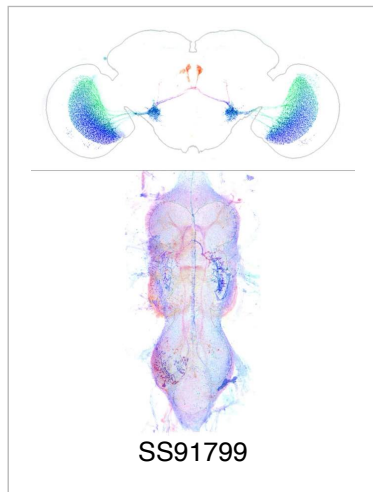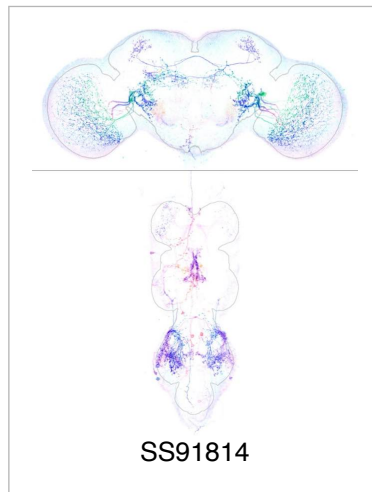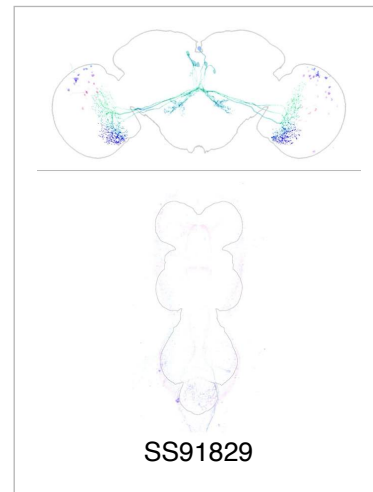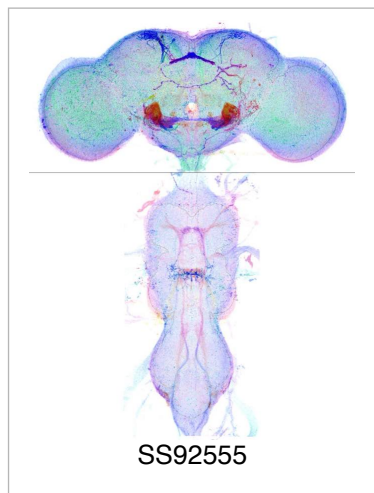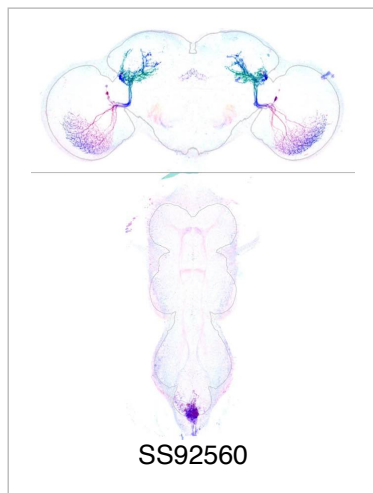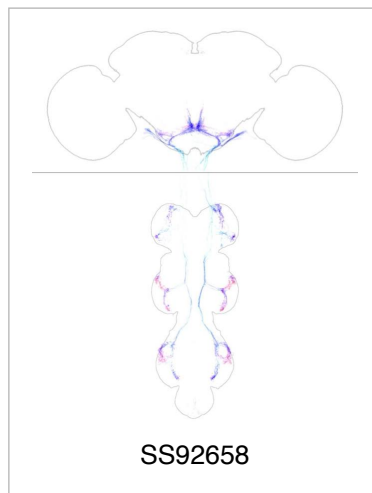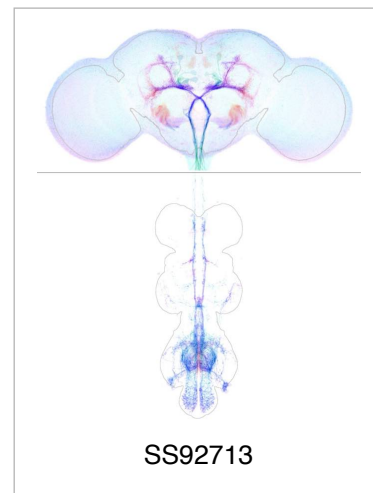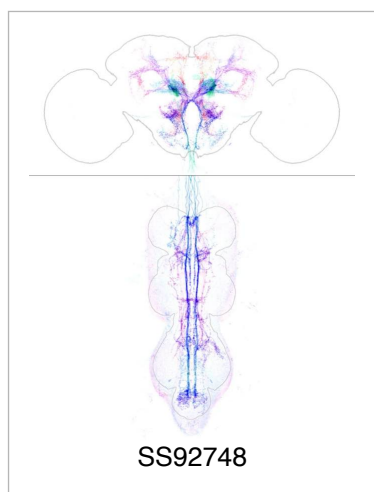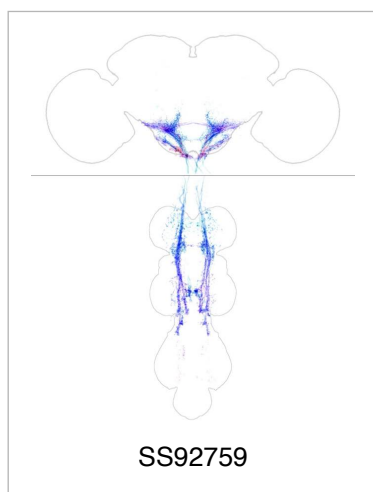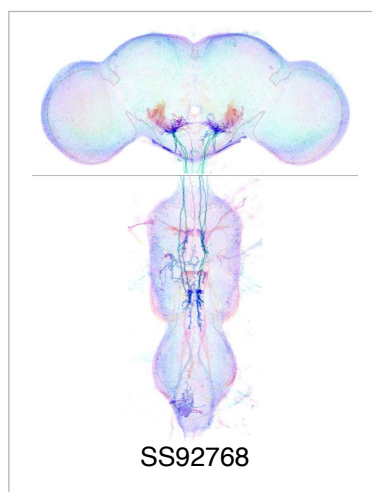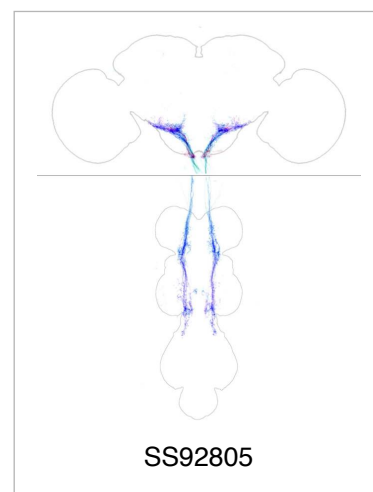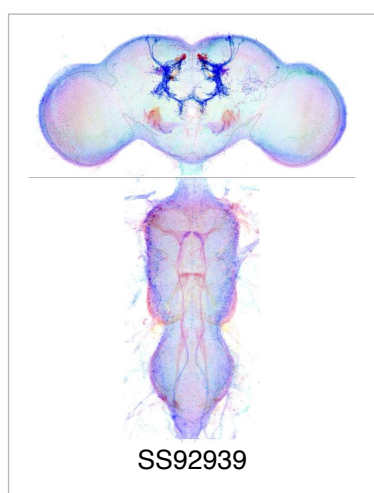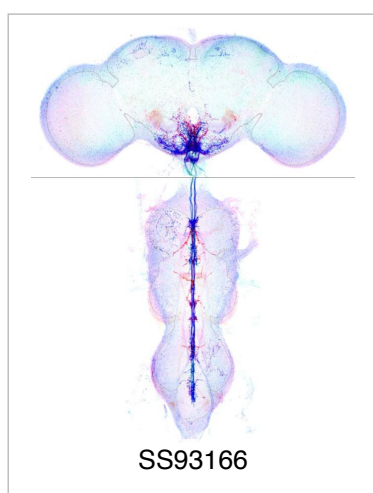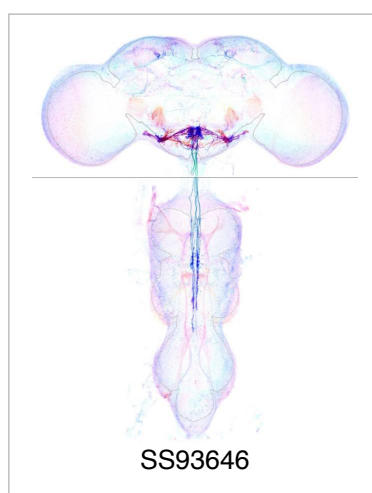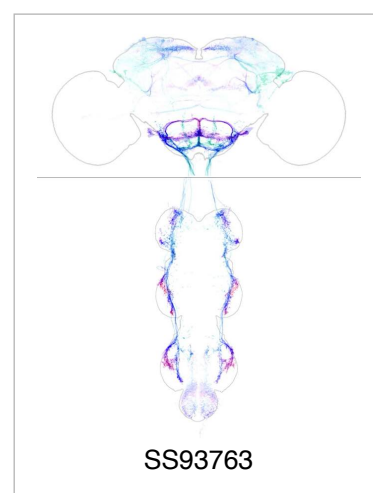



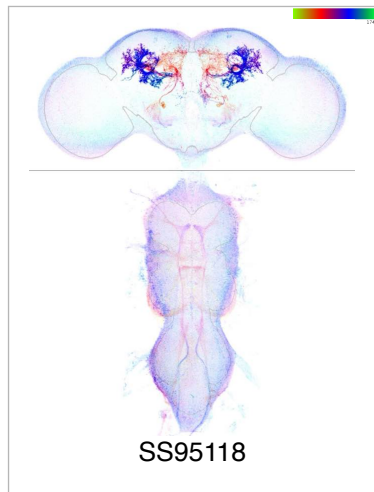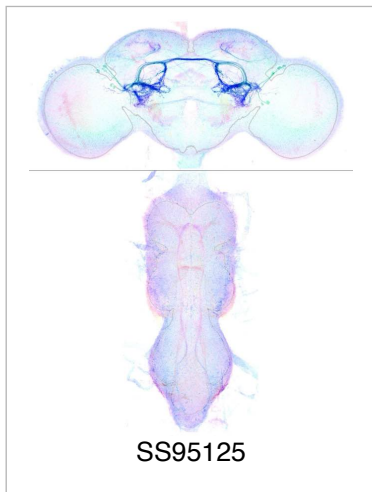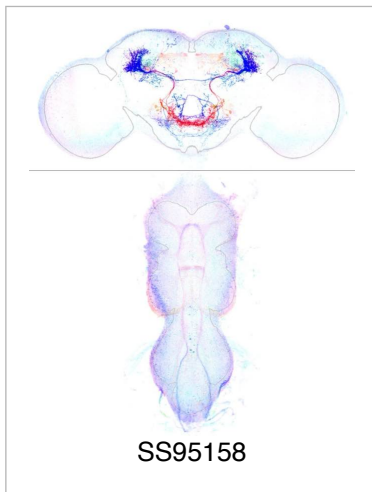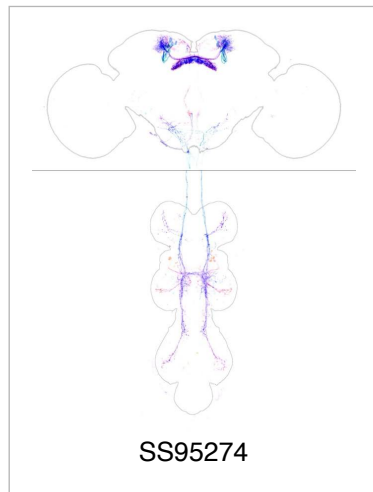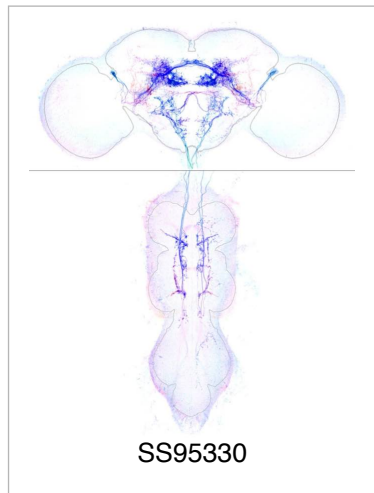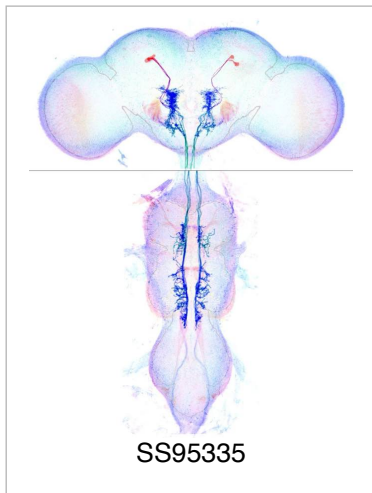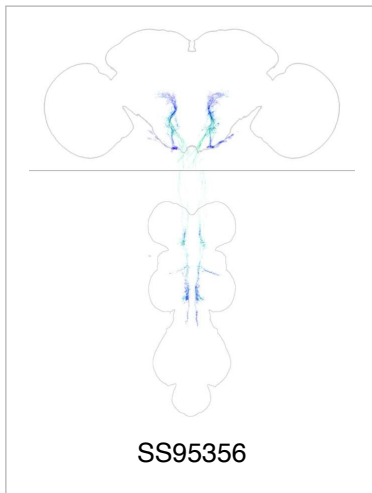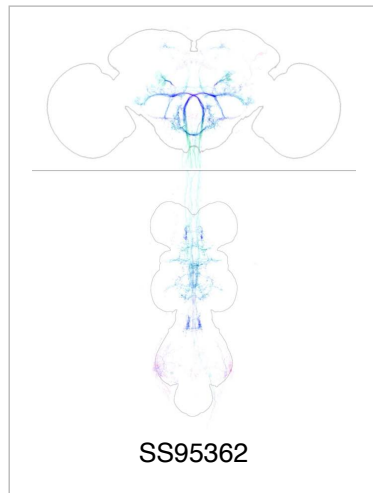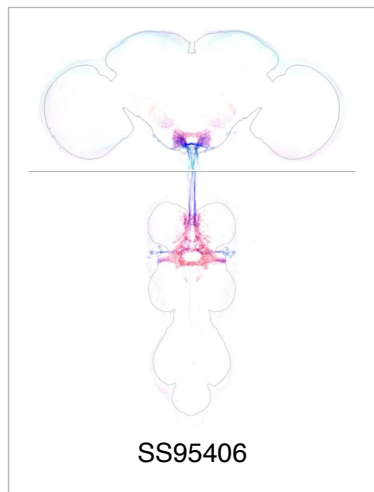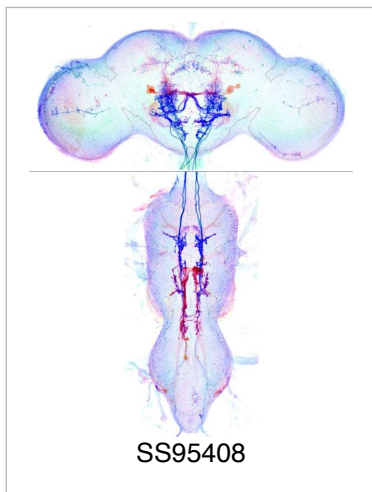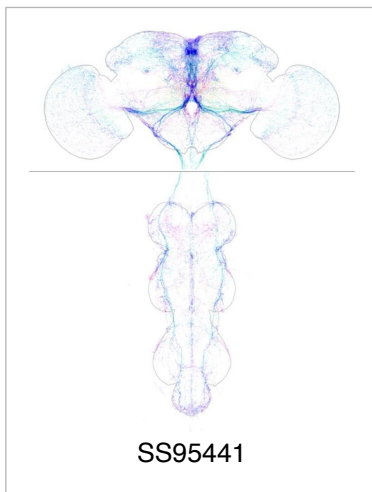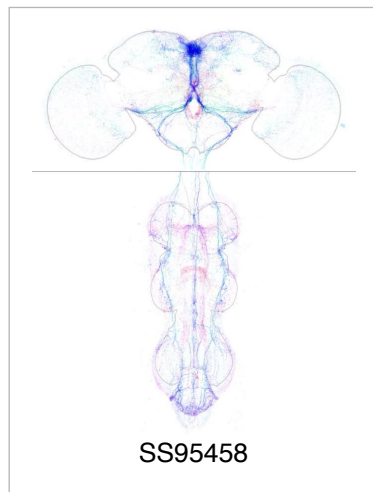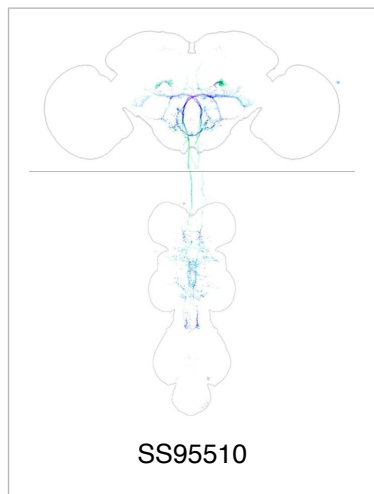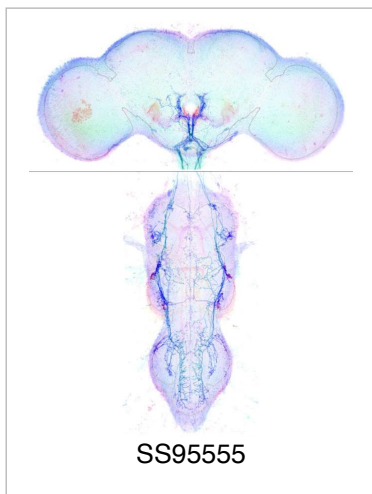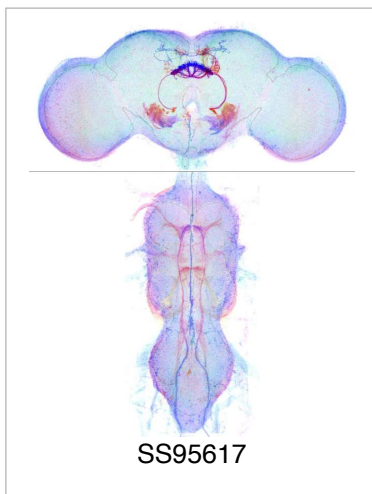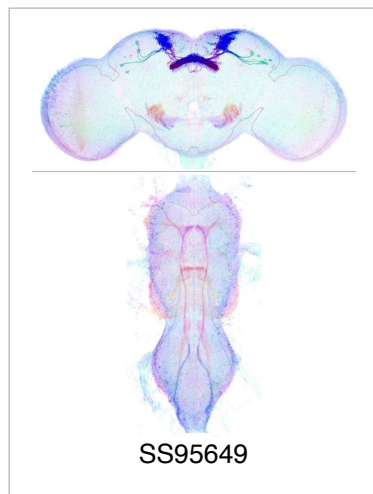

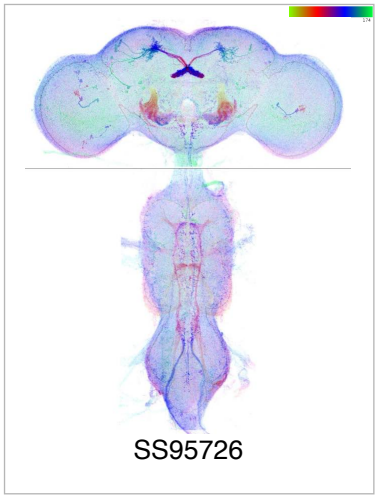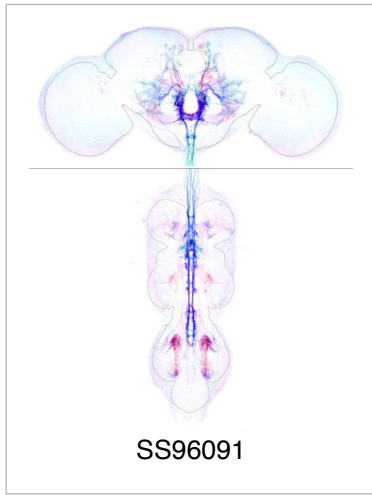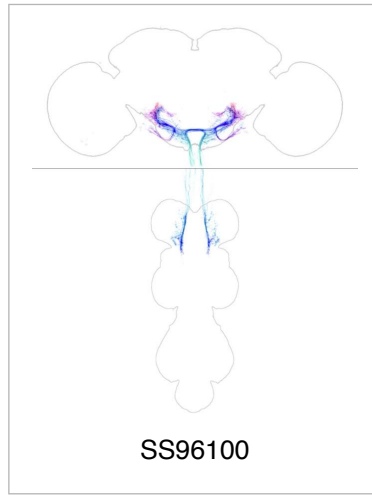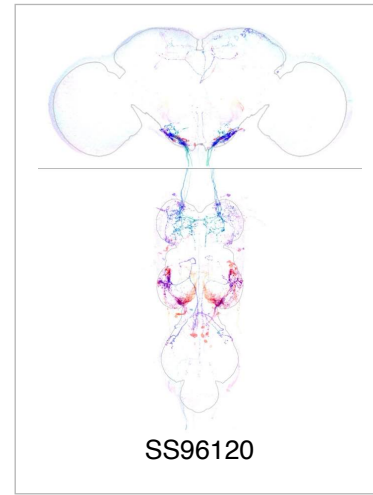

Supplement: supp1 [file elife-98405-supp1-v2.pdf]
