# Supplementary material for: A split-GAL4 driver line resource for Drosophila neuron types
Source: eLife journal article supplement (doi:10.7554/elife.98405), 2024-07-30

# Guide to image data on FlyLight websites

For: [splitgal4.janelia.org](http://splitgal4.janelia.org) & [gen1mcfo.janelia.org](http://gen1mcfo.janelia.org)

Home  FlyLight Split-GAL4 Driver Collection 

Aso Lab Branson Lab Card Lab Descending Interneuron Dickson Lab Rubin Lab Cart (0)

## SS00043

Upcoming top cell-type-specific line

Primary publication (DOI) [10.1002/cne.24512](https://doi.org/10.1002/cne.24512) Projections and movies are opened in a new browser window. For browsers that block pop-up windows by default, please allow them for this site.

Robot ID 2502208

AD [R65B12-p65ADZp in attP40; MKRS/TM6B](#) This page allows download of image stacks in LSM and/or h5j formats. To open and view these stacks, use Fiji (<http://fiji.sc>). Fiji has built-in plugins for stacks in LSM format (Zeiss microscope) and h5j format (a "visually lossless" compression format).

DBD [R30E10-ZpGdbd in attP2](#)

Fly Core Project Split\_GAL4

Genotype w; R65B12-p65ADZp in attP40; R30E10-ZpGdbd in attP2

Grade A

[View on NeuronBridge](#) [View on Virtual Fly Brain](#) [Order from Bloomington Stock Center](#)

### Adult 20x Objective Images [2 images]

Reporter: 20XUAS-CsChrimson-mVenus trafficked in attP18

|            |                |                                                                                     |                                                                                     |
|------------|----------------|-------------------------------------------------------------------------------------|-------------------------------------------------------------------------------------|
| Sex        | Female         |  |  |
| Age        | Day 3-10       | <input type="text" value="Select an image to view"/>                                | <input type="text" value="Select an image to view"/>                                |
| Slide code | 20180411_33_C1 | Brain                                                                               | Ventral nerve cord                                                                  |
| Release    | Wolff 2018     |                                                                                     |                                                                                     |

© 2012-2023 Howard Hughes Medical Institute Janelia Research Campus.



This work is licensed under a [Creative Commons Attribution 4.0 International License](https://creativecommons.org/licenses/by/4.0/).

## Contents:

1. Image formats
2. FlyLight sample labeling methods
3. 63x and 40x image tile names

# Organization

Adult 20x Objective Images [2 images]

Reporter: 20XUAS-CsChrimson-mVenus trafficked in attP18

|            |                |
|------------|----------------|
| Sex        | Female         |
| Age        | Day 3-10       |
| Slide code | 20180411_33_C1 |
| Release    | Wolff 2018     |

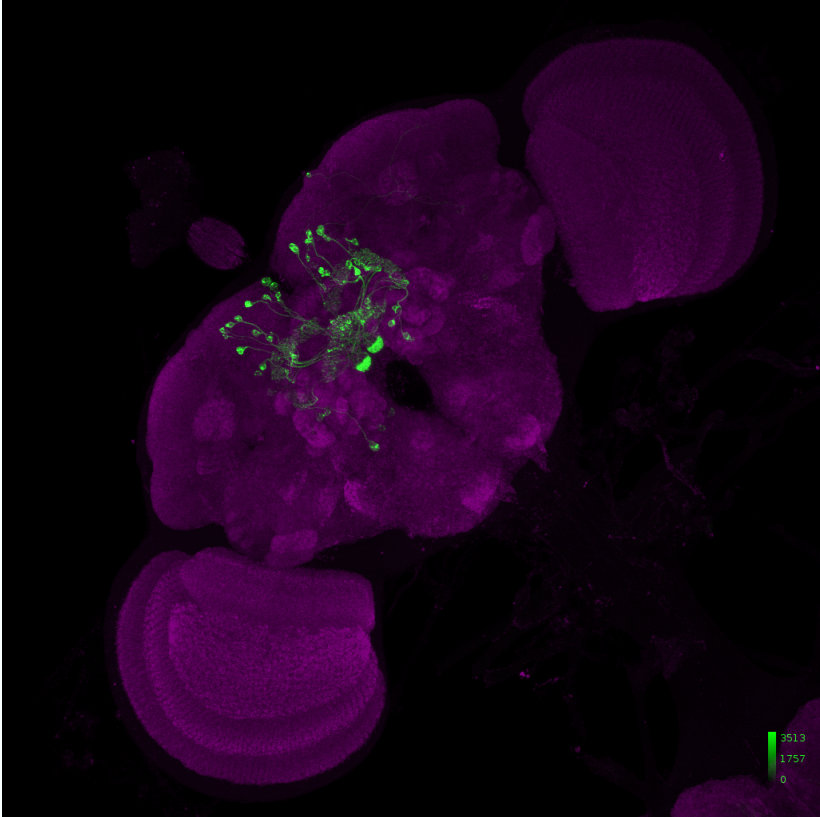

Select an image to view

Brain



Select an image to view

Ventral nerve cord

- Images for each line are grouped by objective, reporter, and sample (fly), with image tiles shown as thumbnails
- Select the menu beneath a thumbnail to view or download a variety of 2D image, movie, or microscope format 3D stacks, detailed on next page

# Image formats

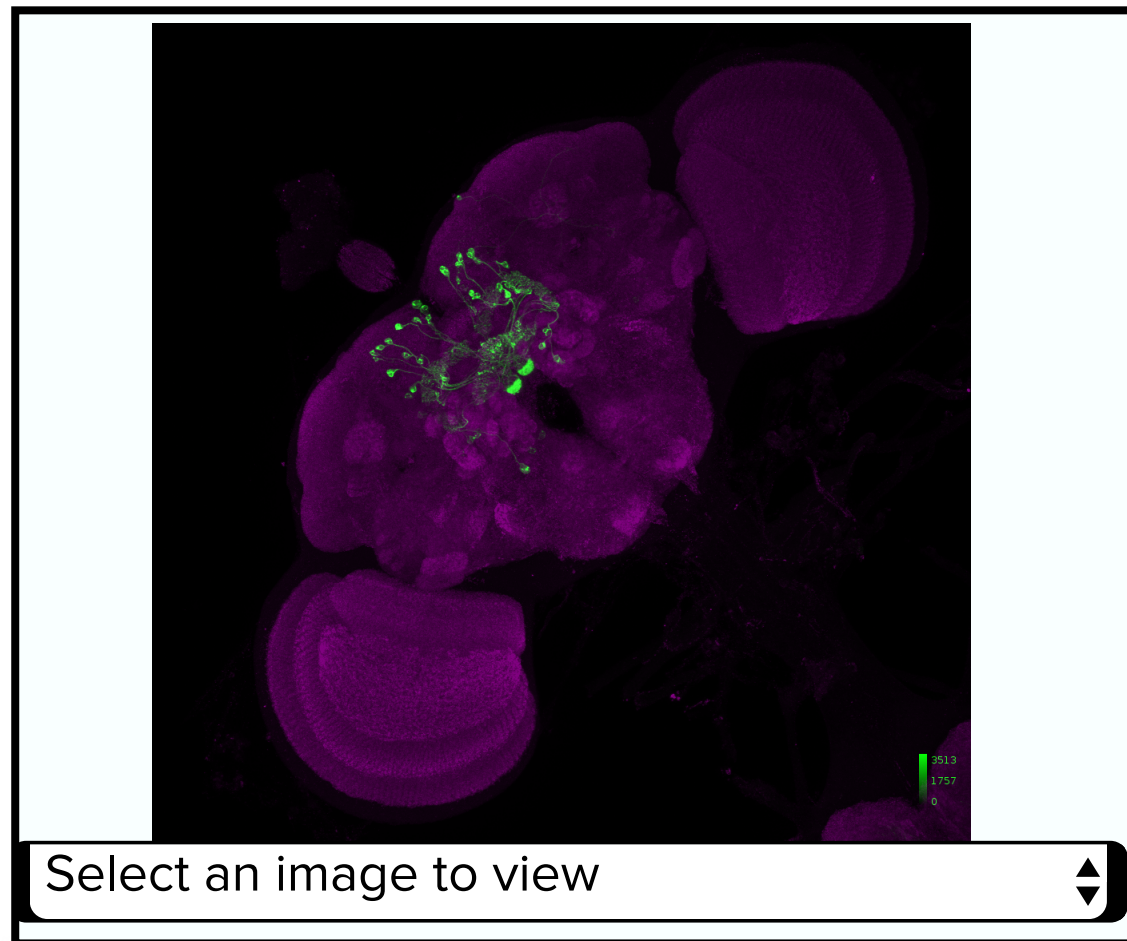

- ✓ Select an image to view
- MIP: Aligned gendered (all channels)
- MIP: Aligned unisex (all channels)
- MIP: Unaligned (all channels)
- MIP: Unaligned (signal channels)
- Color depth MIP: Aligned (Channel 1)
- Color depth MIP: Aligned (Channel 2)
- Movie: Unaligned (all channels)
- Movie: Unaligned (signal channels)
- Download H5J stack: Aligned gendered
- Download H5J stack: Aligned unisex
- Download H5J stack: Unaligned
- Download LSM: Raw data

- Thumbnails show unaligned neuropil reference and neuron signal channels
- Maximum Intensity Projections (MIPs) give 2D views of data with original colors
- Images can be unaligned (as captured) or aligned to JRC2018 template (<https://doi.org/10.1371/journal.pone.0236495>)
- Color Depth MIPs (CDM) use color to indicate depth in z dimension; blue is close and red is far (<http://dx.doi.org/10.1101/318006>)
- Most stacks are H5J compressed (<http://data.janelia.org/h5j>)
- Original data capture format is a minimally-compressed LSM stack

# Image processing details

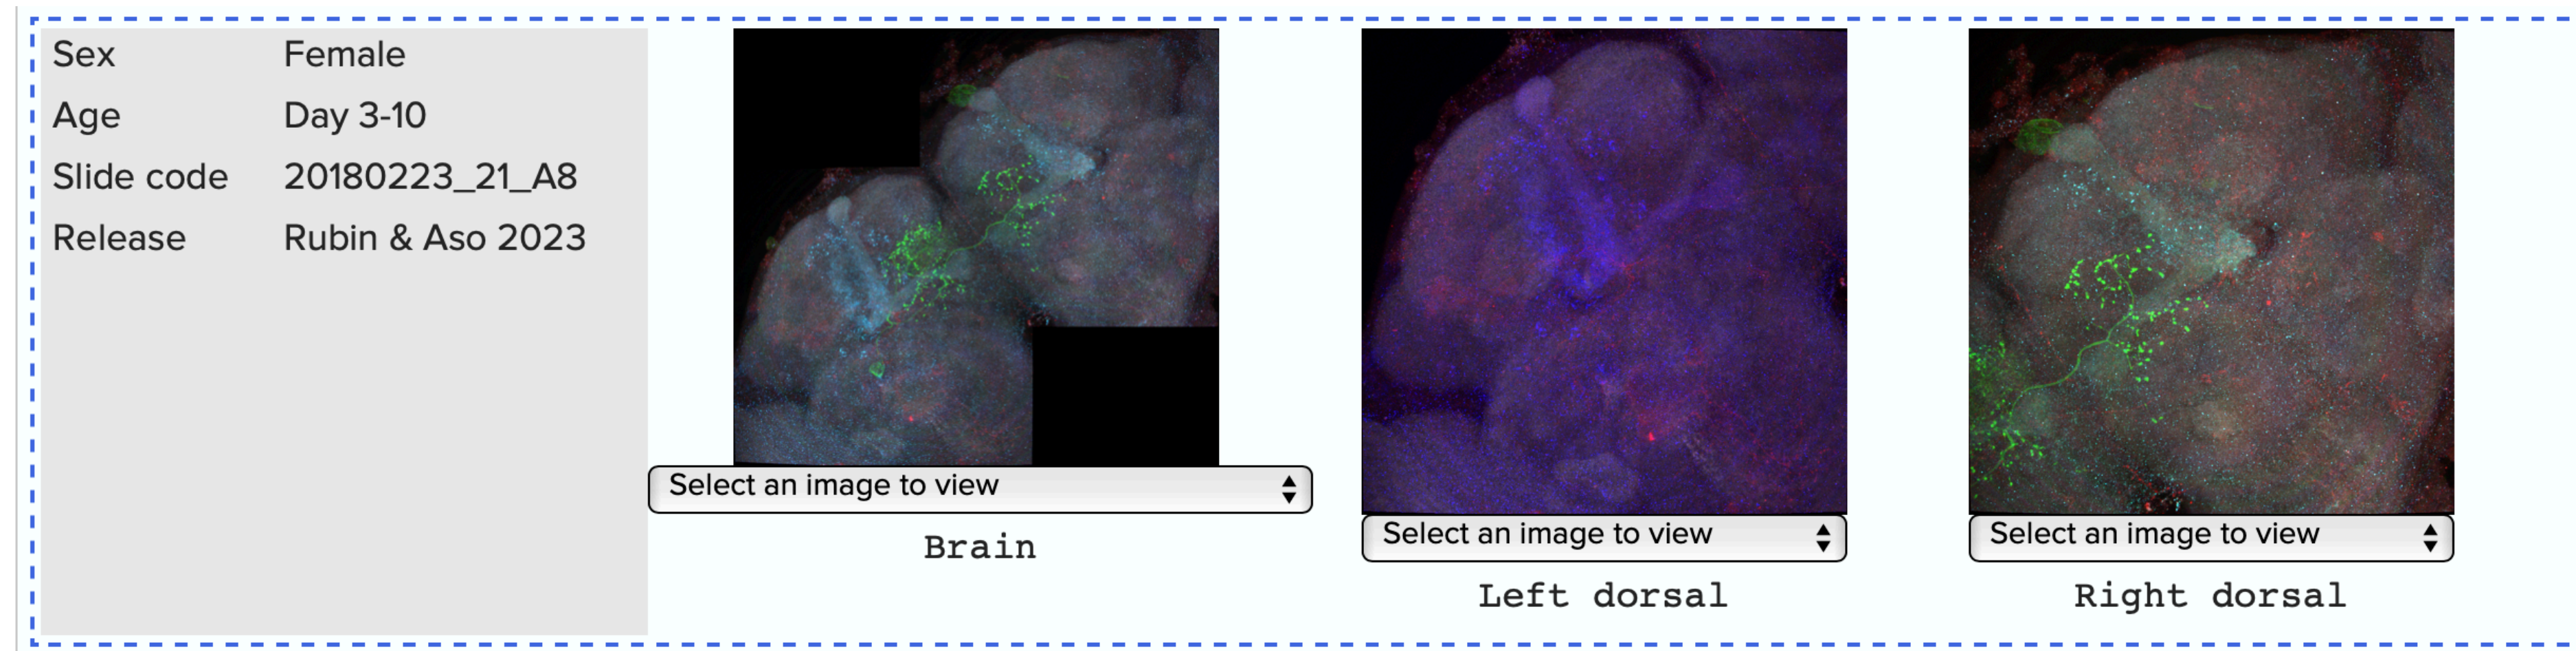

- The number of samples per line varies
- Slide code indicates date of slide creation, pipeline code, and location of individual sample on slide
- Images are individually optimized for brightness
- Some types of image outputs may show saturation; raw data (LSM stacks) have minimal saturation
- Brain and VNC images may be stitched from multiple tiles. Tiles for each sample/region are captured with consistent imaging parameters but are shown scaled independently.

# FlyLight pipelines characterizing genetic lines

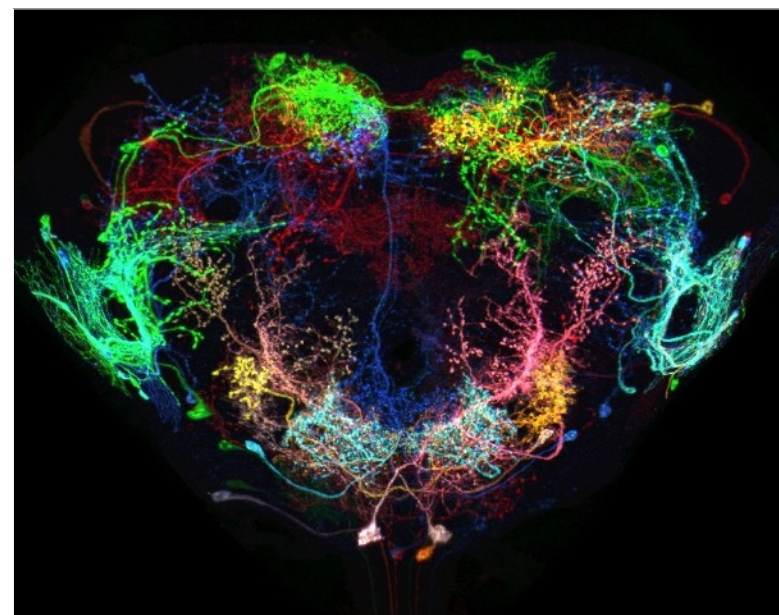

**Generation 1**

**MCFO:**

Identifying potential  
Gen1 GAL4 lines

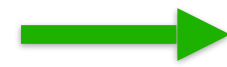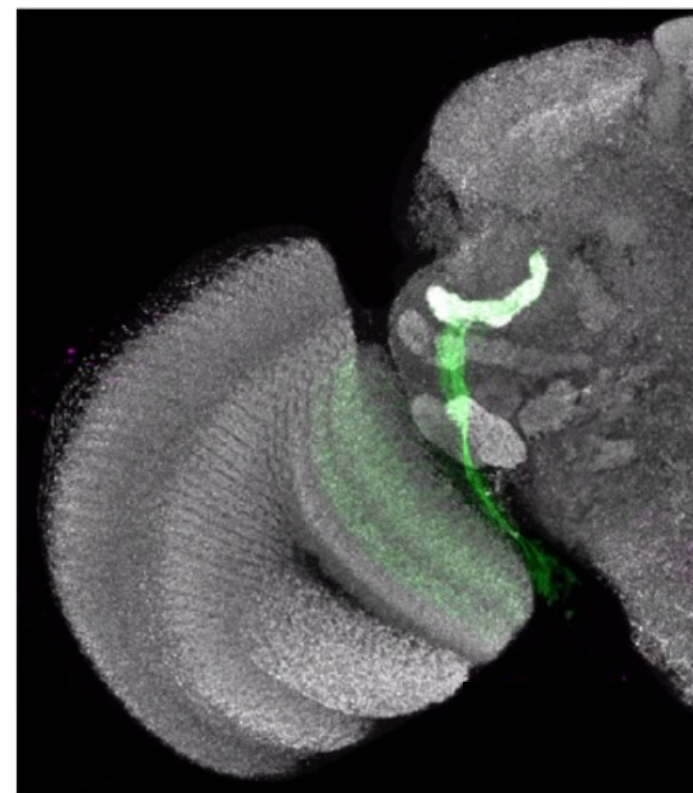

Wu, Nern, et al., 2016

**Screen:**

Identifying  
the best split-  
GAL4  
combinations

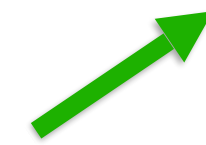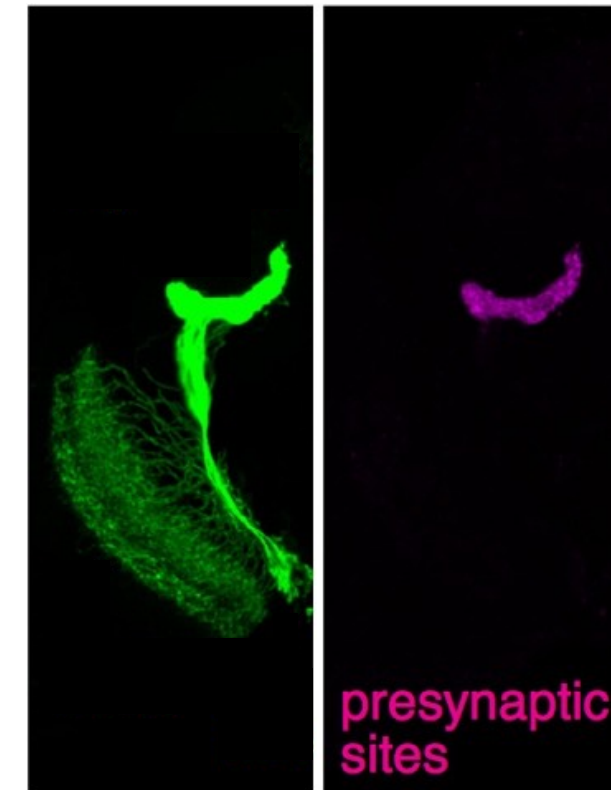

**Polarity:**

Determining  
neuronal  
input and output

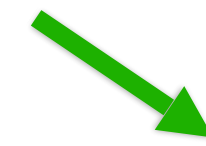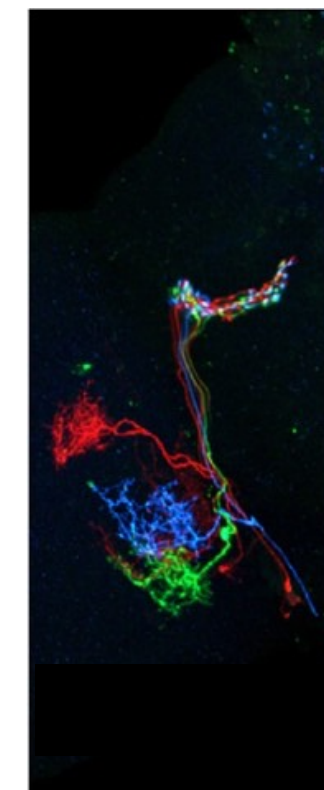

**Multicolor Flp-  
out (MCFO):**

Understanding  
cells within a  
line

# Screen pipeline

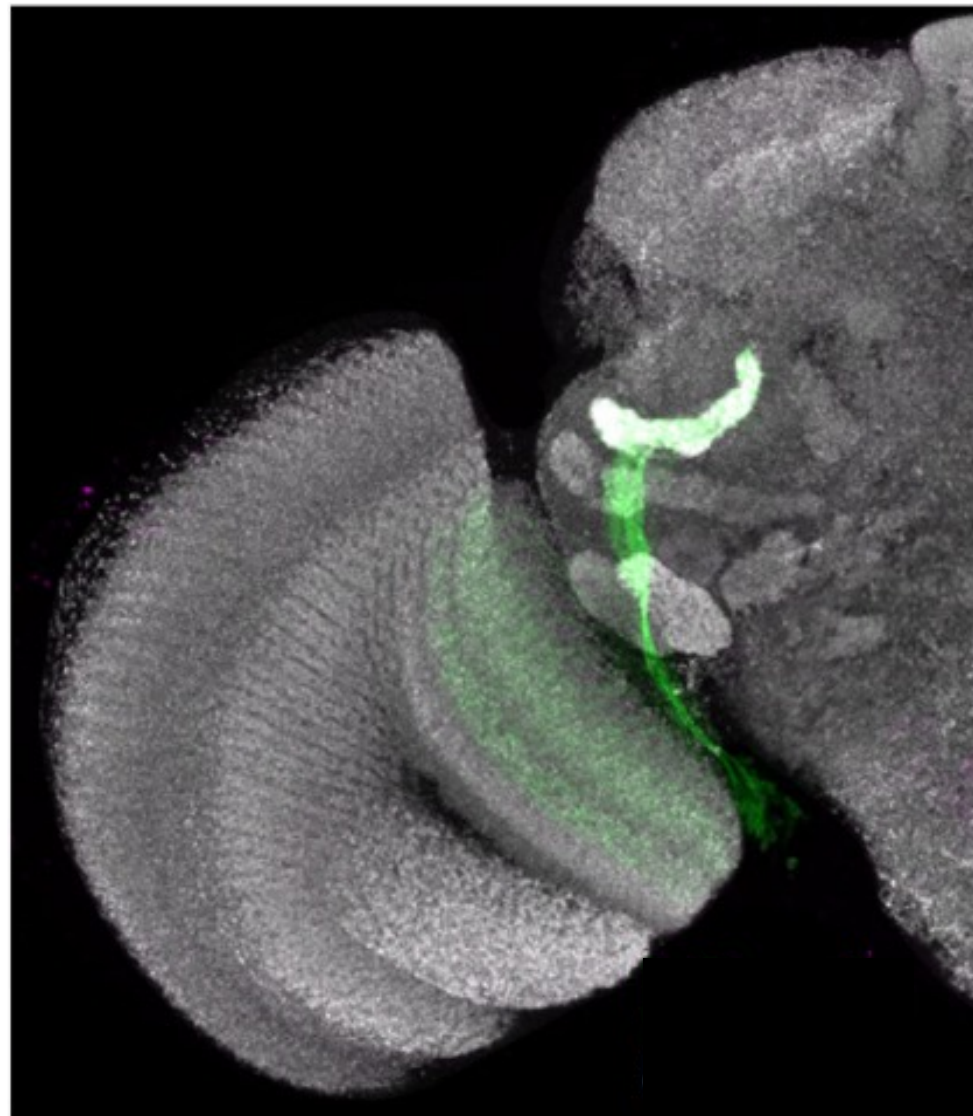

UAS reporter: 20XUAS-Cs-Chrimson-mVenus trafficked in attP18

|                | Screen             |                 |
|----------------|--------------------|-----------------|
| Target         | Reference neuropil | neuron          |
| Genetic marker | endogenous         | UAS-GFP         |
| Primary        | mouse nc82         | rabbit anti-GFP |
| Secondary      | 568 anti-mouse     | 488 anti-rabbit |

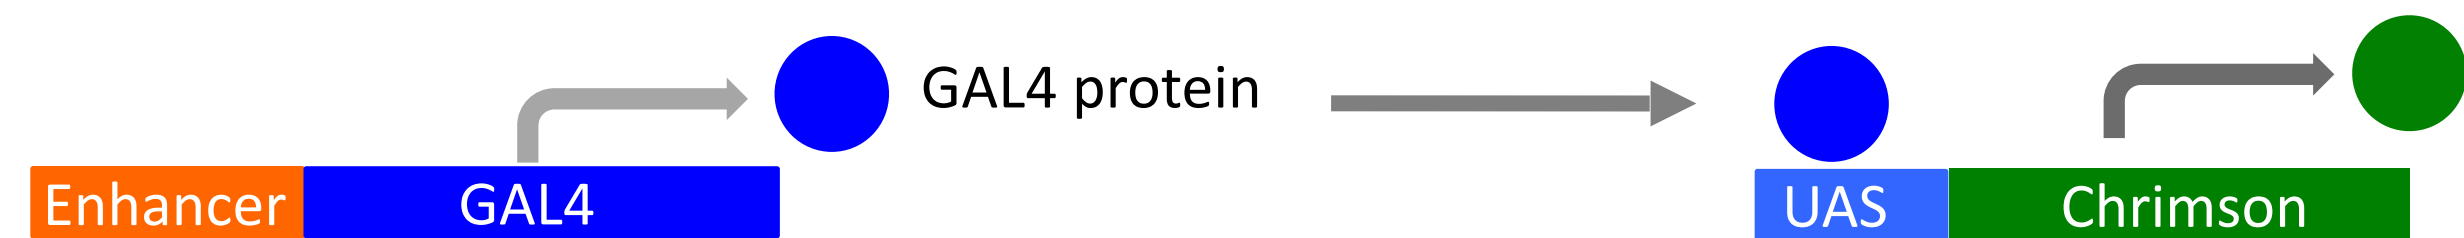

# Polarity pipeline

Standard approach is to label:

- GAL4-specific neuronal membrane
- GAL4-specific presynaptic terminal
- nc82 neuropil reference

Two main purposes:

- Determine polarity (inputs and outputs) of neurons
- High-quality GAL4 membrane labeling

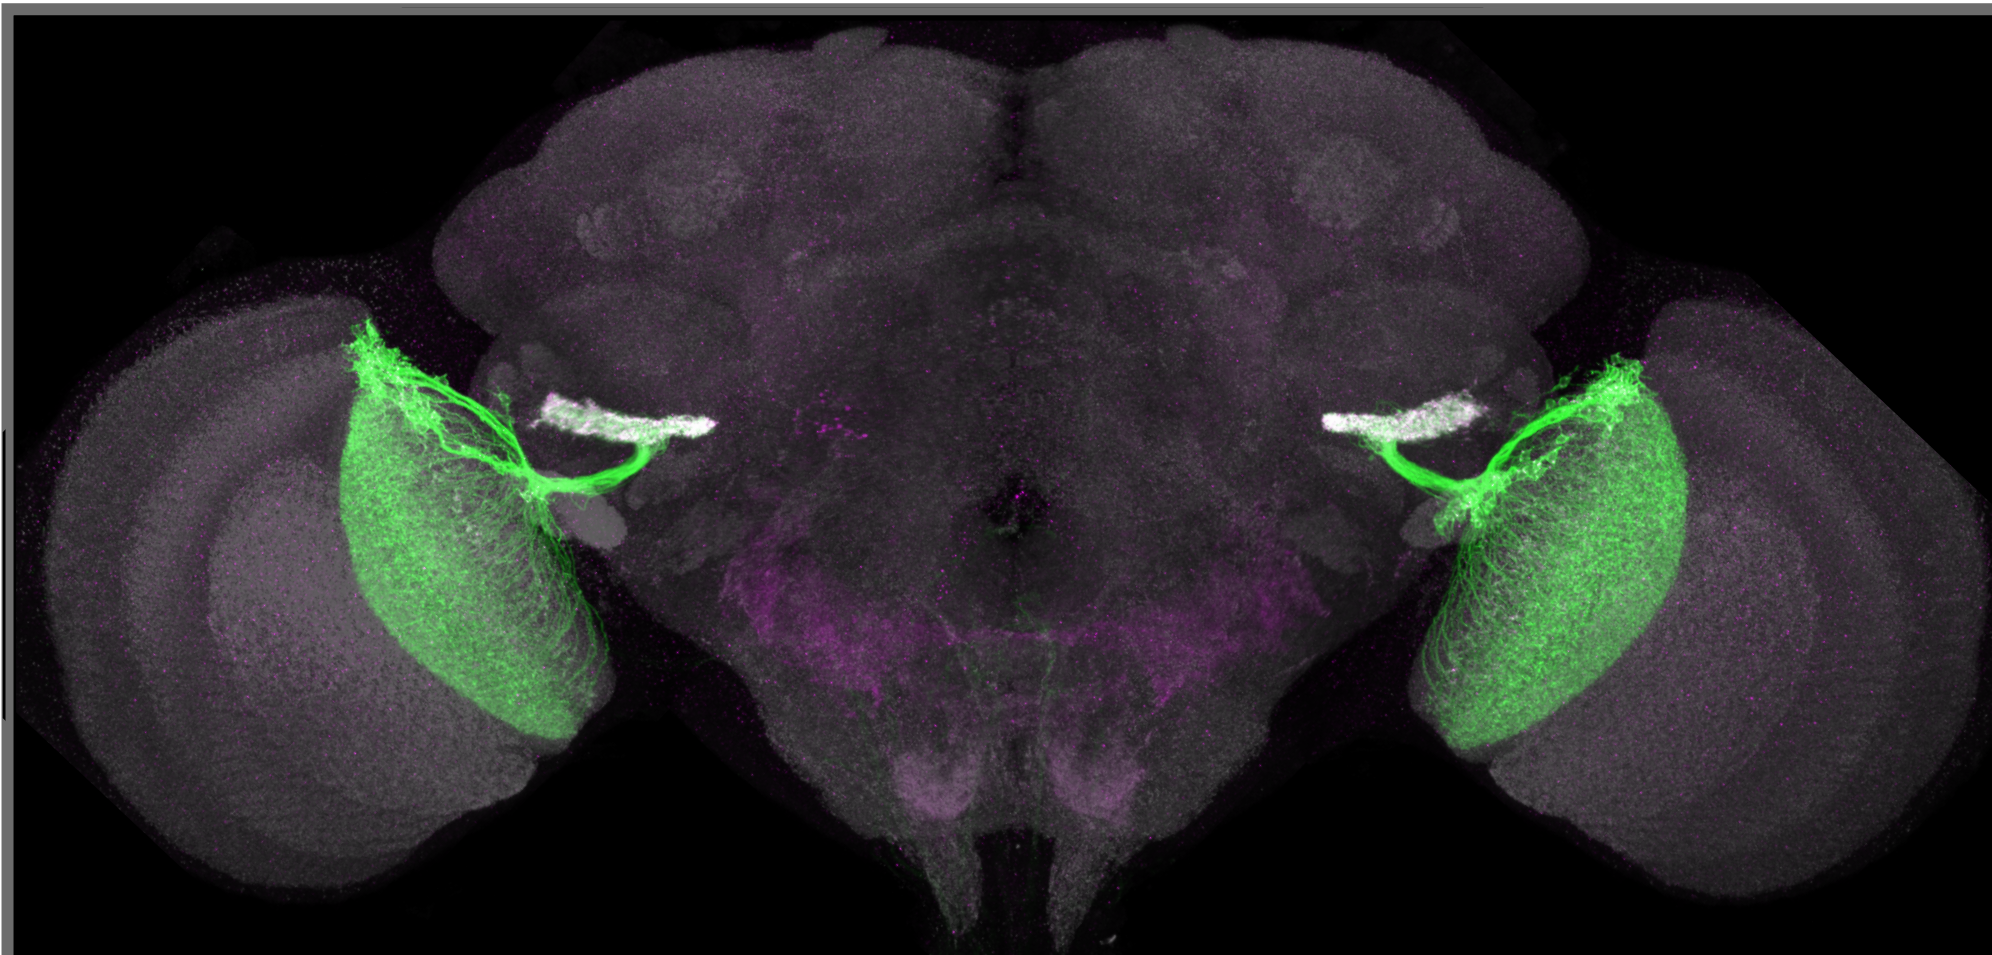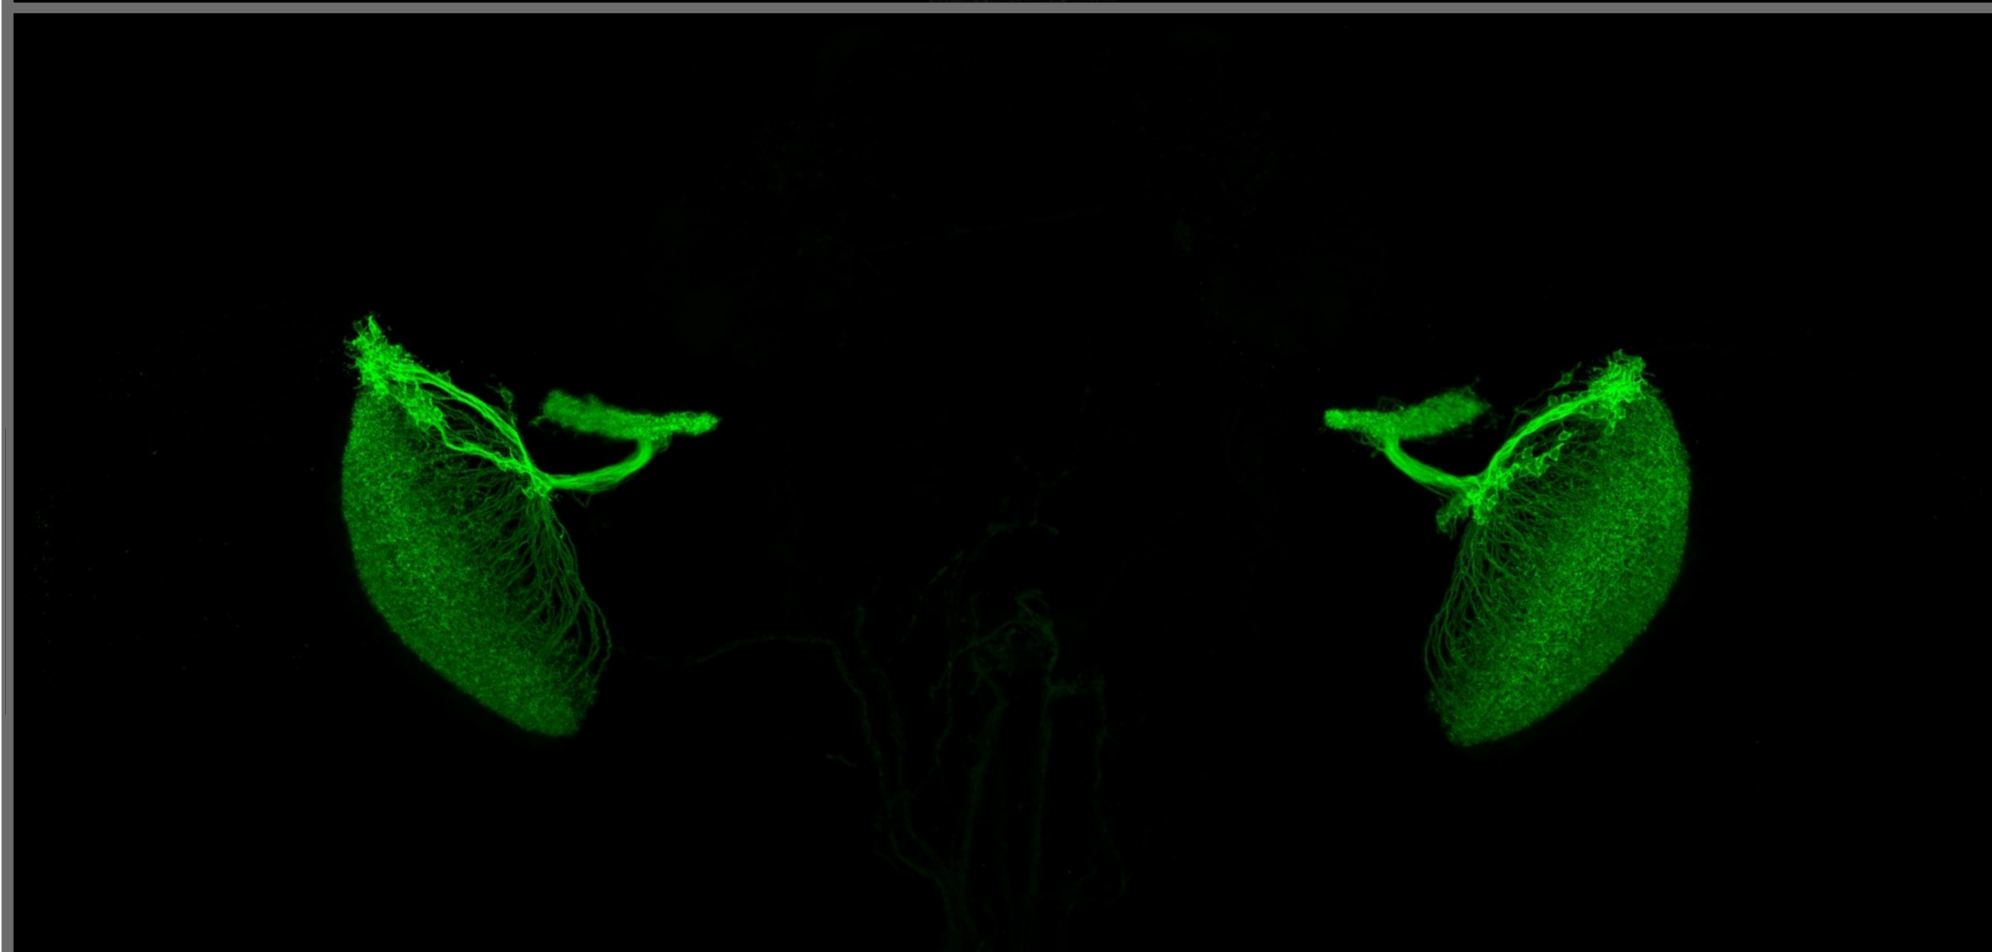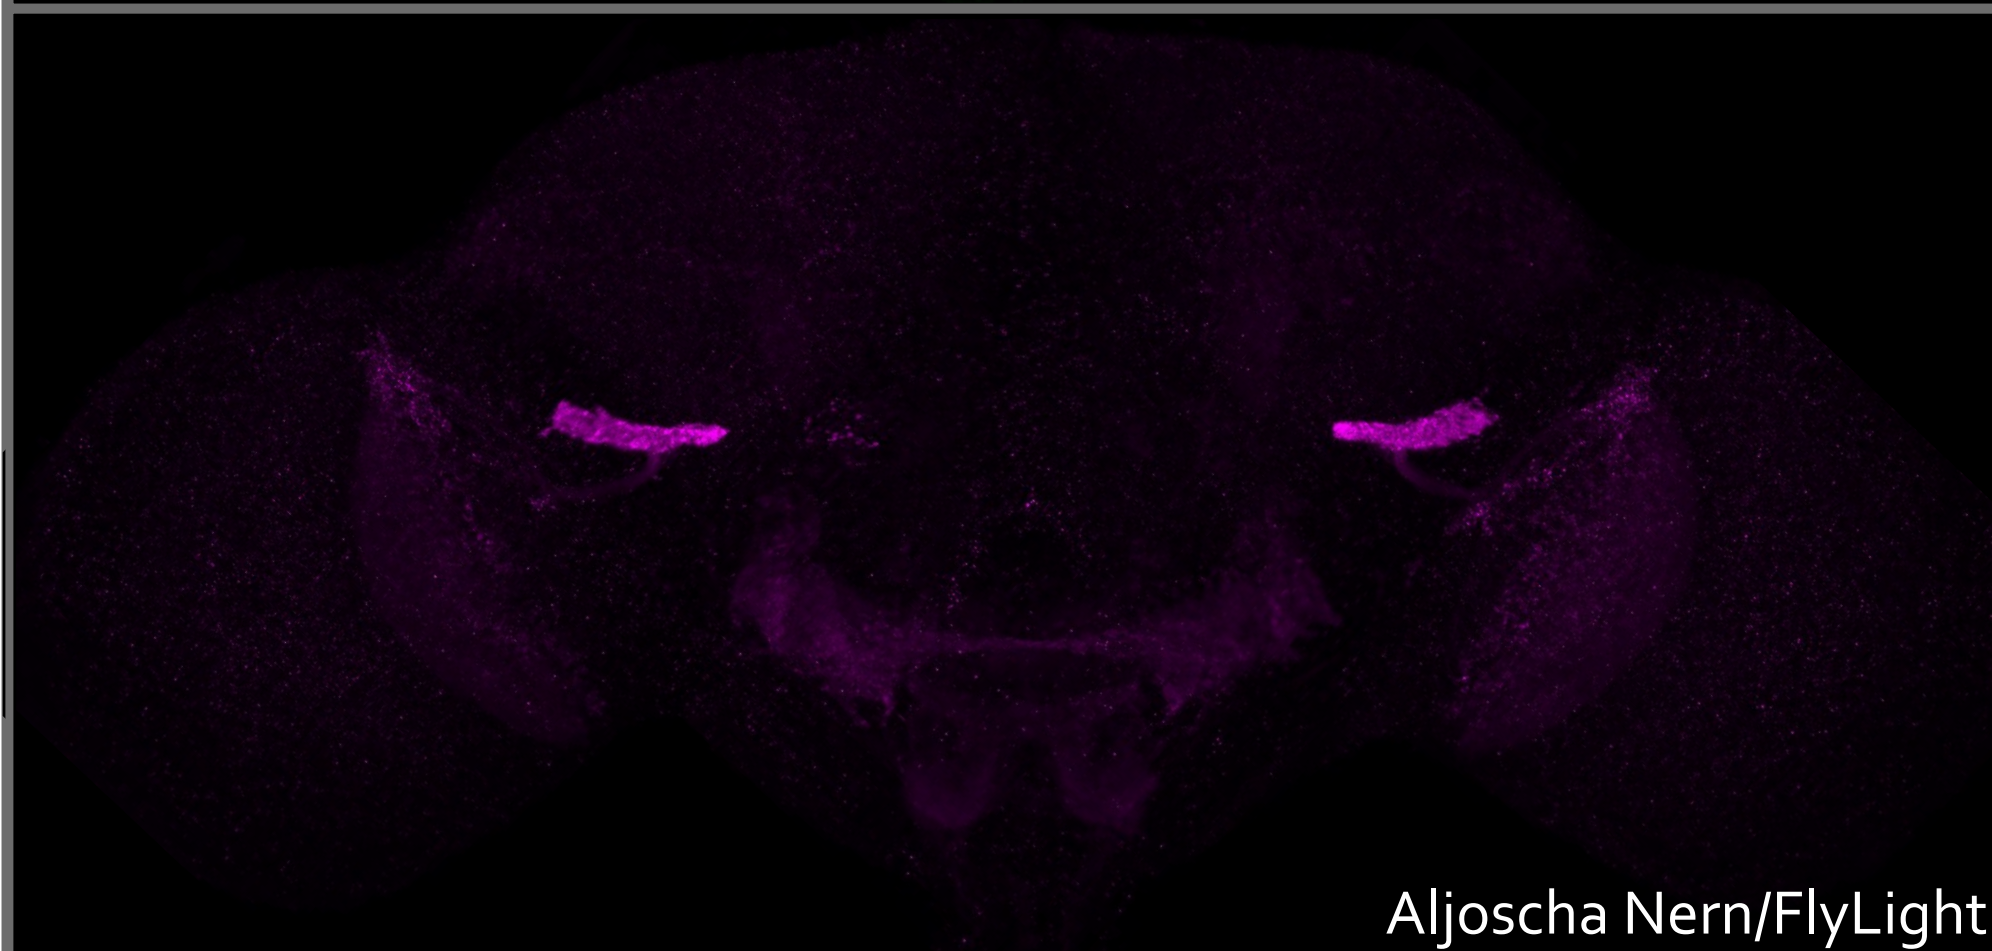

# Polarity Cases (variations on labeling methods)

|                                | Case 3         |                   | Case 4          |                   | Case 5          |                   |
|--------------------------------|----------------|-------------------|-----------------|-------------------|-----------------|-------------------|
|                                | Primary Ab     | Secondary Ab      | Primary Ab      | Secondary Ab      | Primary Ab      | Secondary Ab      |
| <b>nc82 (neuropil)</b>         | mouse nc82     | Cy2 anti-mouse    | mouse nc82      | AF568 anti-mouse  | mouse nc82      | AF568 anti-mouse  |
| <b>UAS-Syt-HA (synapse)</b>    | Rabbit anti-HA | Cy3 anti-rabbit   | -               | -                 | Rat anti-HA     | ATTO647N anti-rat |
| <b>UAS-myr-FLAG (membrane)</b> | Rat anti-FLAG  | ATTO647N anti-rat | -               | -                 | -               | -                 |
| <b>UAS-Chrimson (membrane)</b> | -              | -                 | Rabbit anti-GFP | AF488 anti-rabbit | Rabbit anti-GFP | AF488 anti-rabbit |

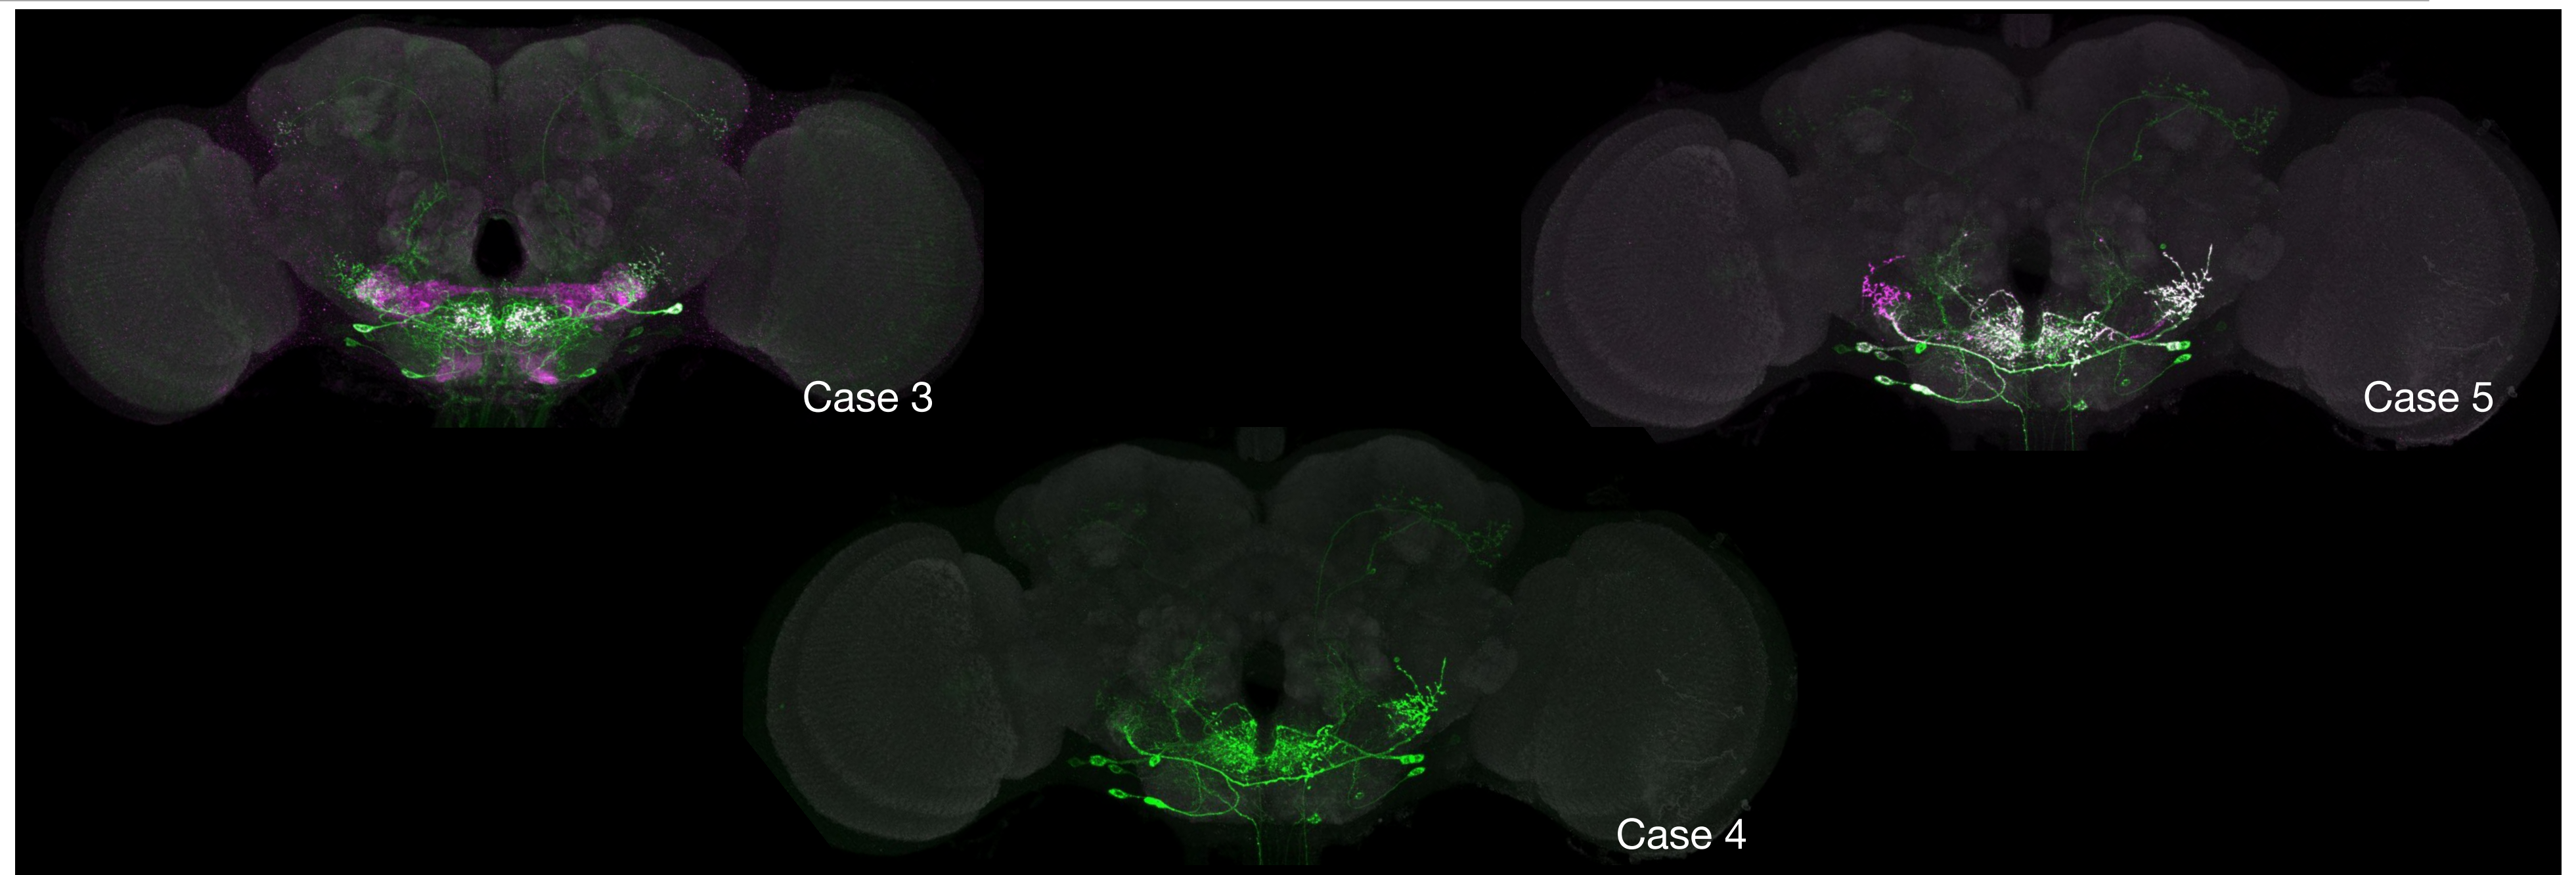



# Polarity Case 3

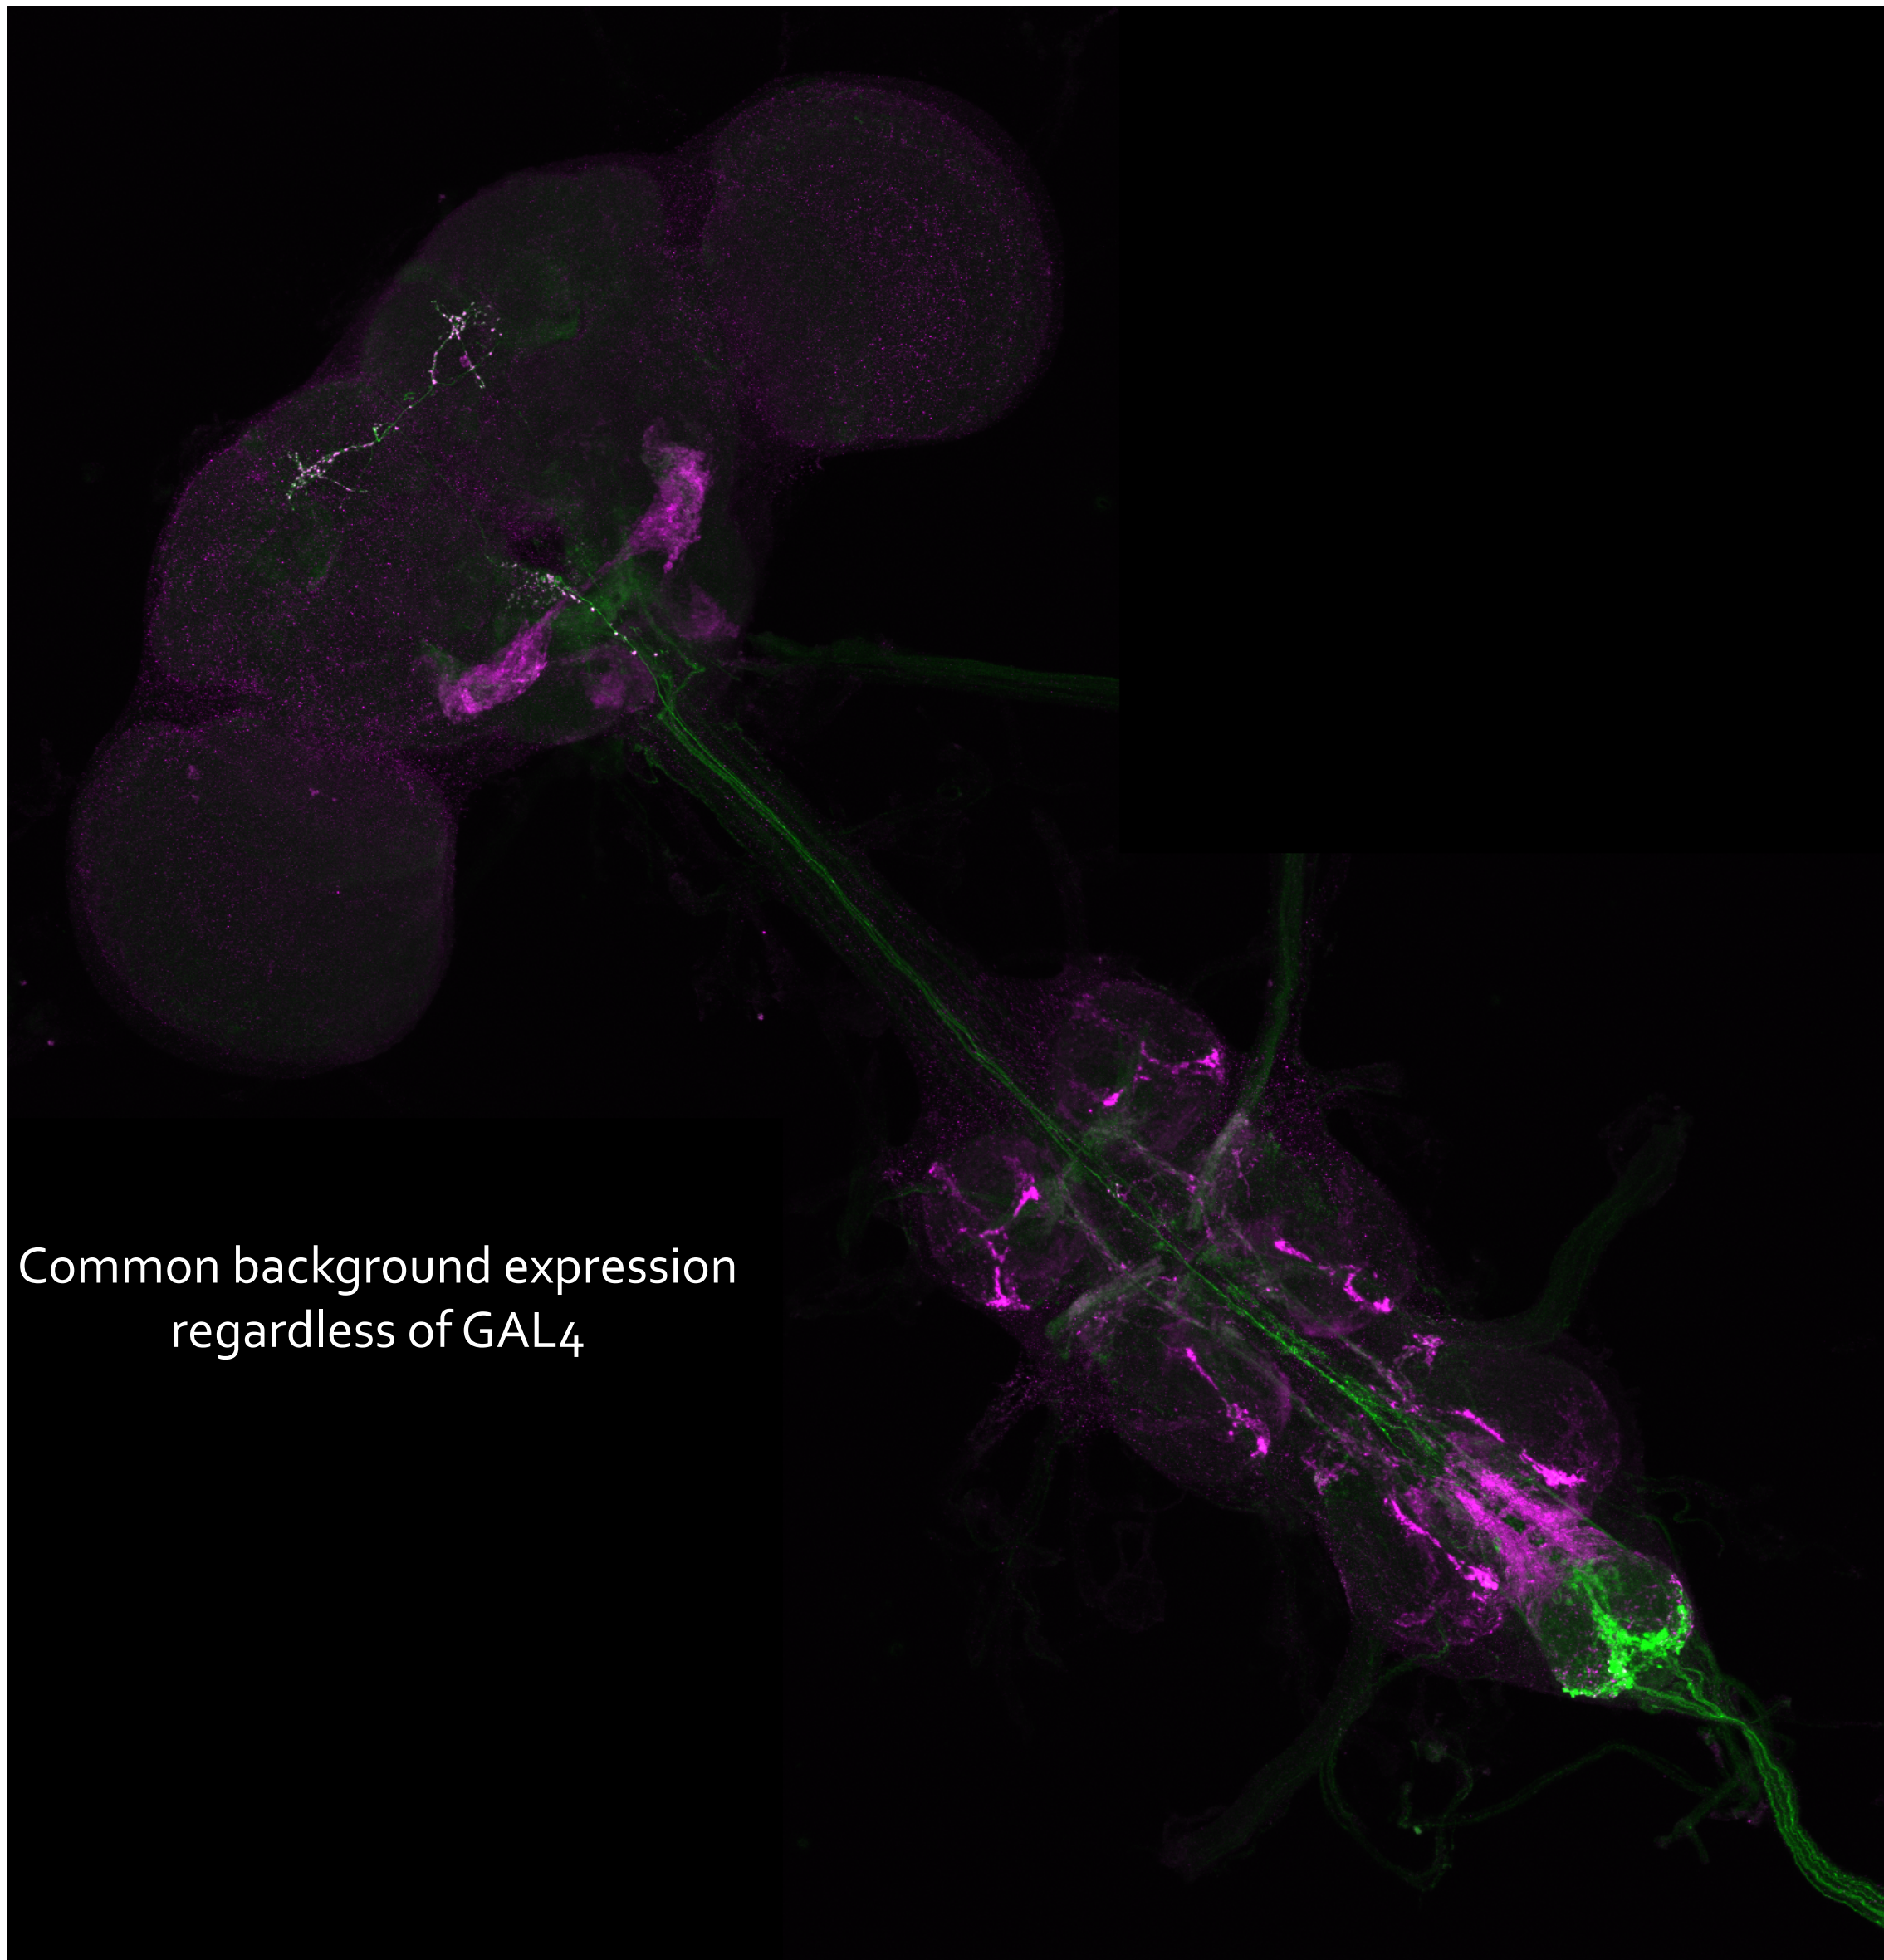

- UAS Reporters:
- Membrane: pJFRC225-5XUAS-IVS-myr::smGFP-FLAG in VK00005
- Synapse: pJFRC51-3XUAS-IVS-Syt::smGFP-HA in su(Hw)attP1
  
- Excellent intracellular synaptic labeling specificity
- Membrane label reliably fills GAL4 patterns
- But high background expression of membrane and synaptic reporters
  
- UAS-myr-FLAG reporter instead of Chrimson-mVenus
  - Different reporter from Screen & behavioral studies
    - Different attP insertion site
  - Harder to correlate Polarity pattern with other studies

# Polarity Case 4

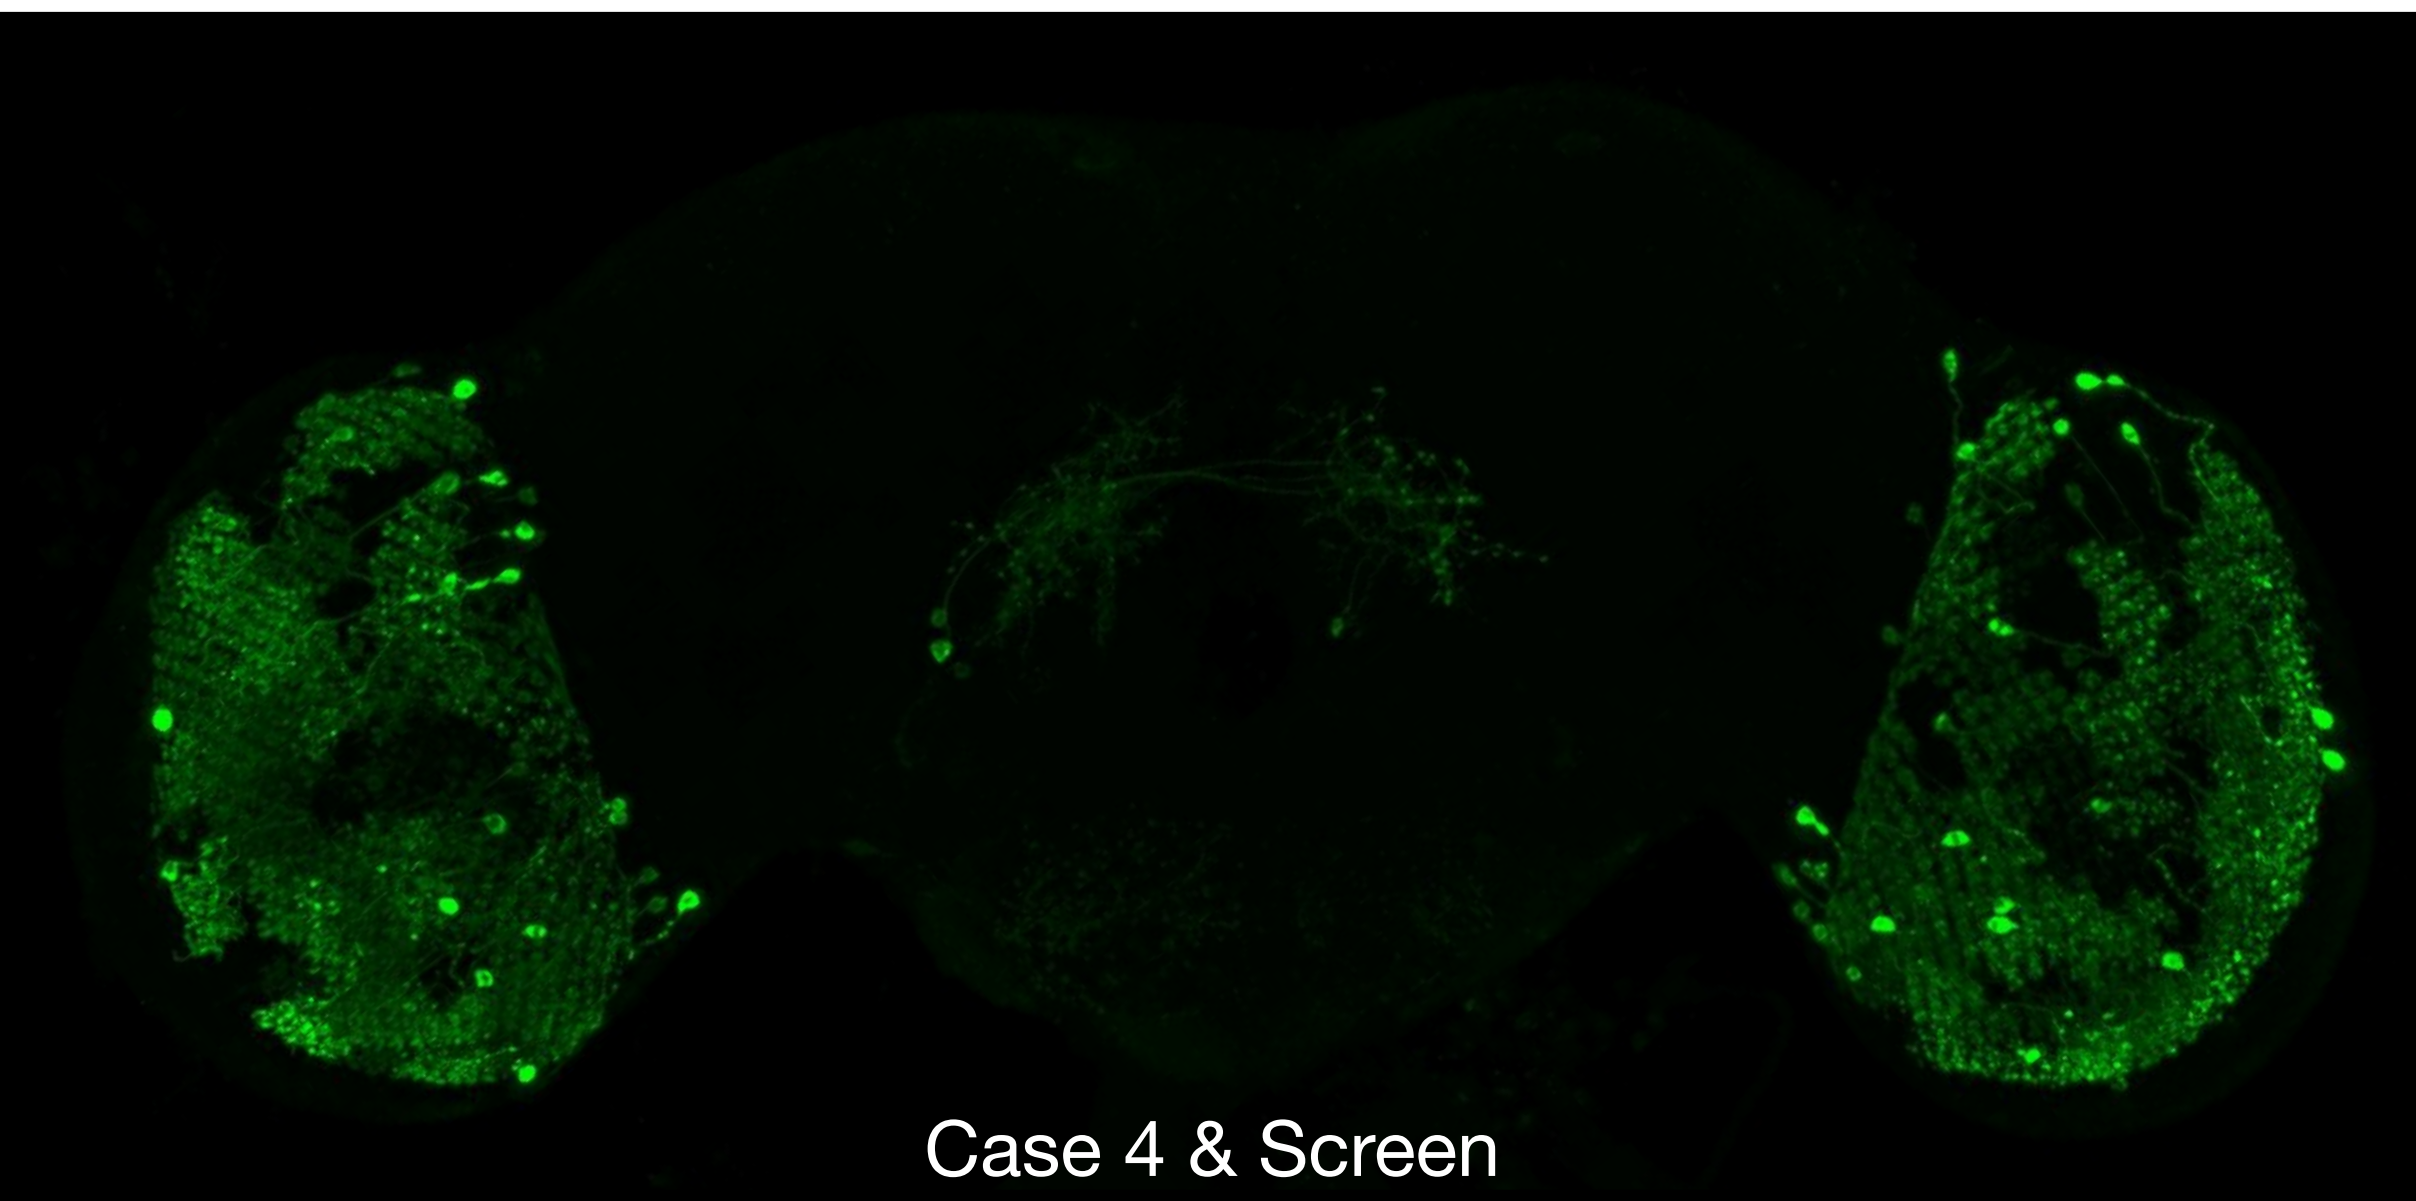

- UAS reporter: 20XUAS-Cs-Chrimson-mVenus trafficked in attP18
- Polarity Case 4 and Screen pipelines use the same UAS reporter and antibodies
- UAS-Chrimson-mVenus reporter allows direct comparison to physiology
- No synaptic label, despite Polarity name
- Very low background
- Less uniform labeling of GAL4 pattern than UAS-myr-FLAG
  - Greater variation between cell body and projection intensities
  - Doesn't always label all neurons in GAL4 pattern

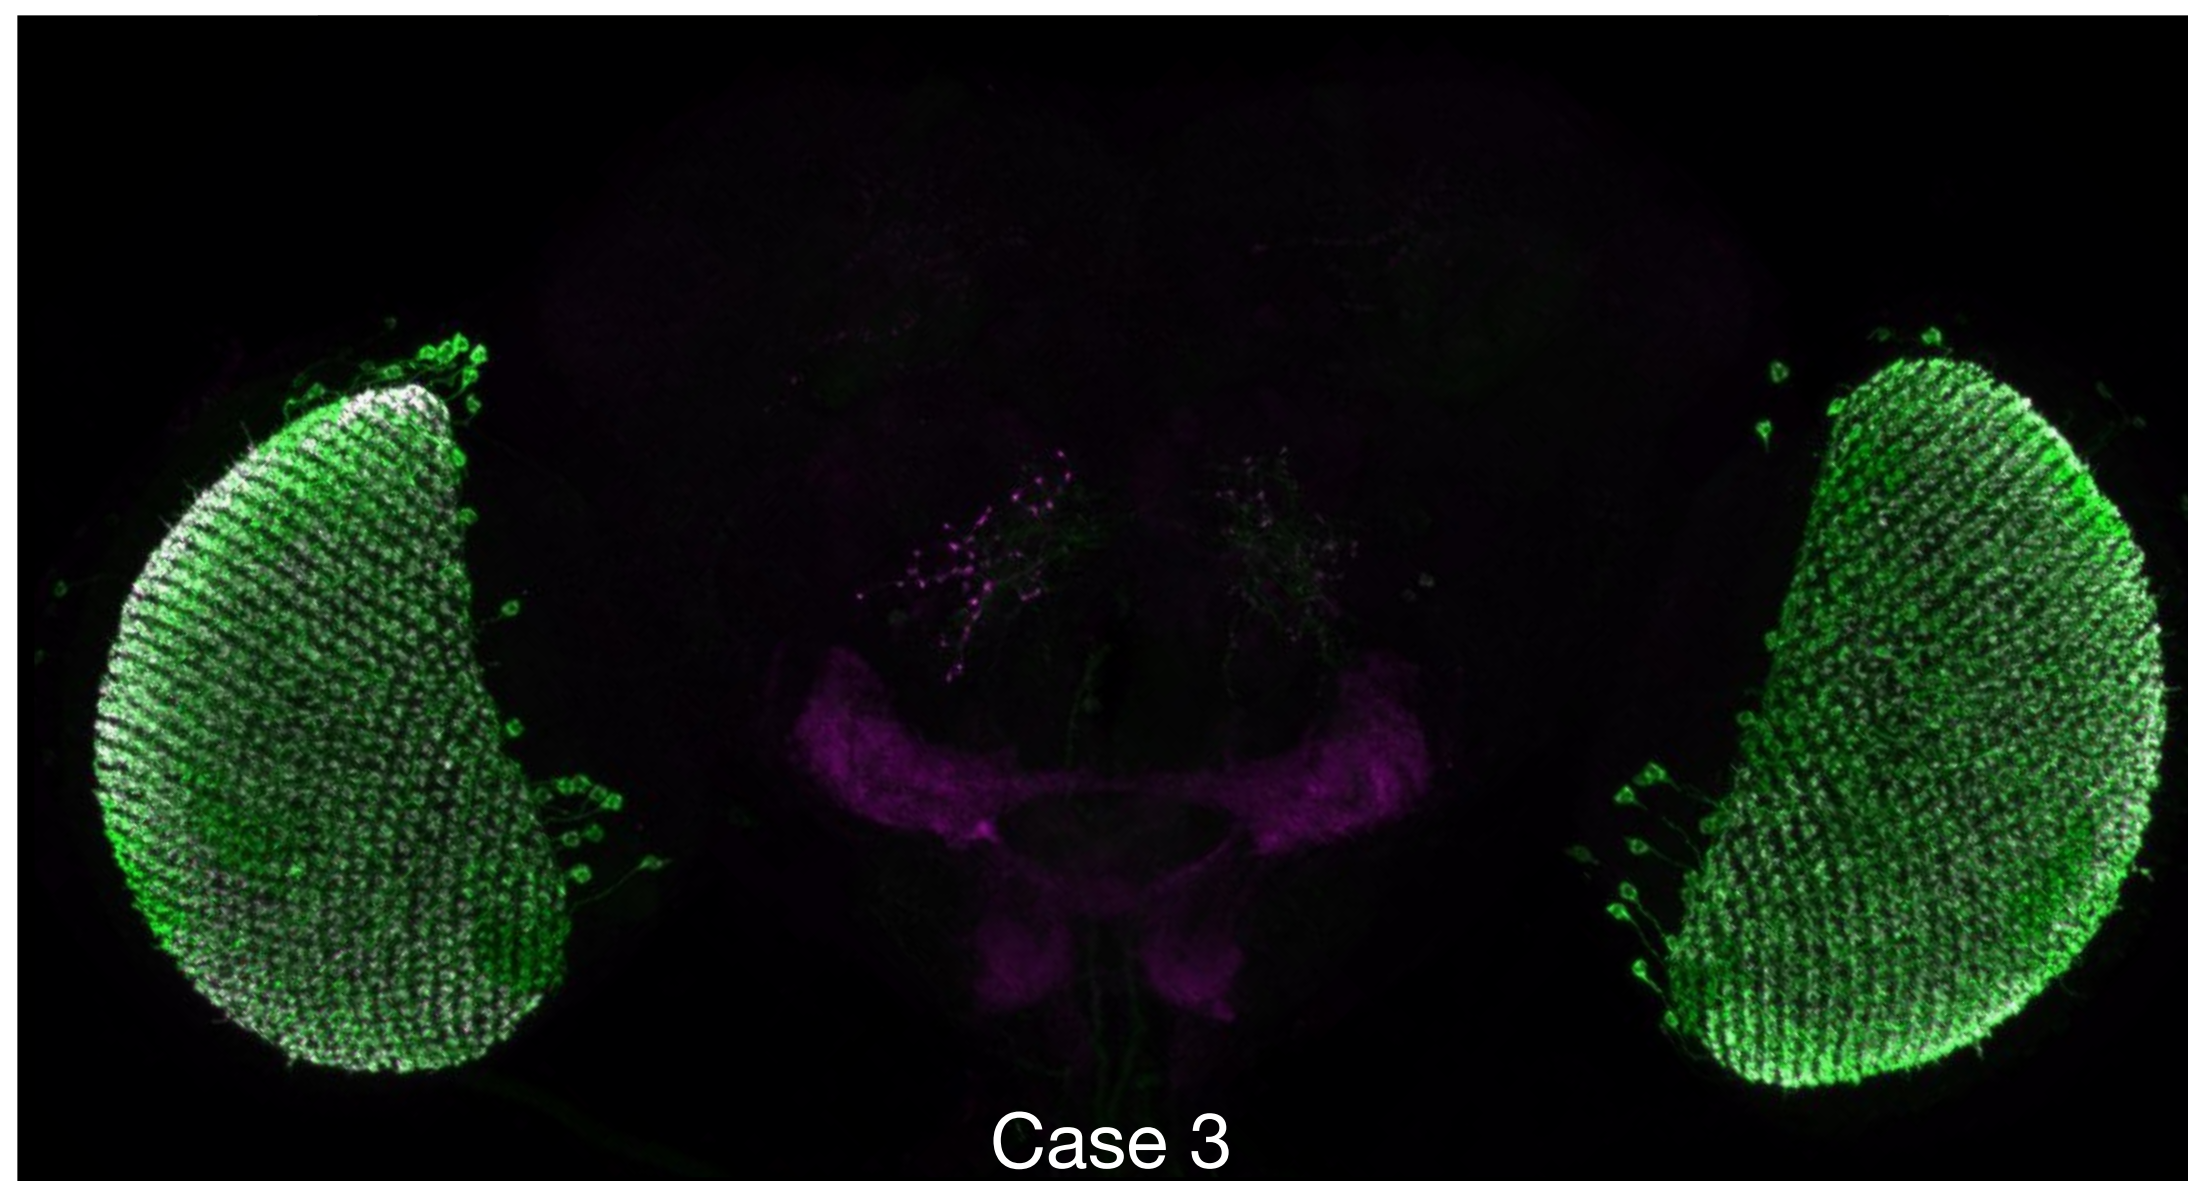

# Polarity Case 5

- UAS Reporters:
- Membrane: 20XUAS-Cs-Chrimson-mVenus trafficked in attP18
- Synapse: UAS-Syt-HA (different from Case 3)

- Chrimson-mVenus instead of myr-FLAG
  - Maximizes consistency with screening & physiology results
- Labels presynaptic terminals, but less accurate intracellular localization than Case 3
- Very low background in most cases
- Common contaminants can grow during IHC and be labeled by anti-GFP antibody, requiring sodium azide suppression

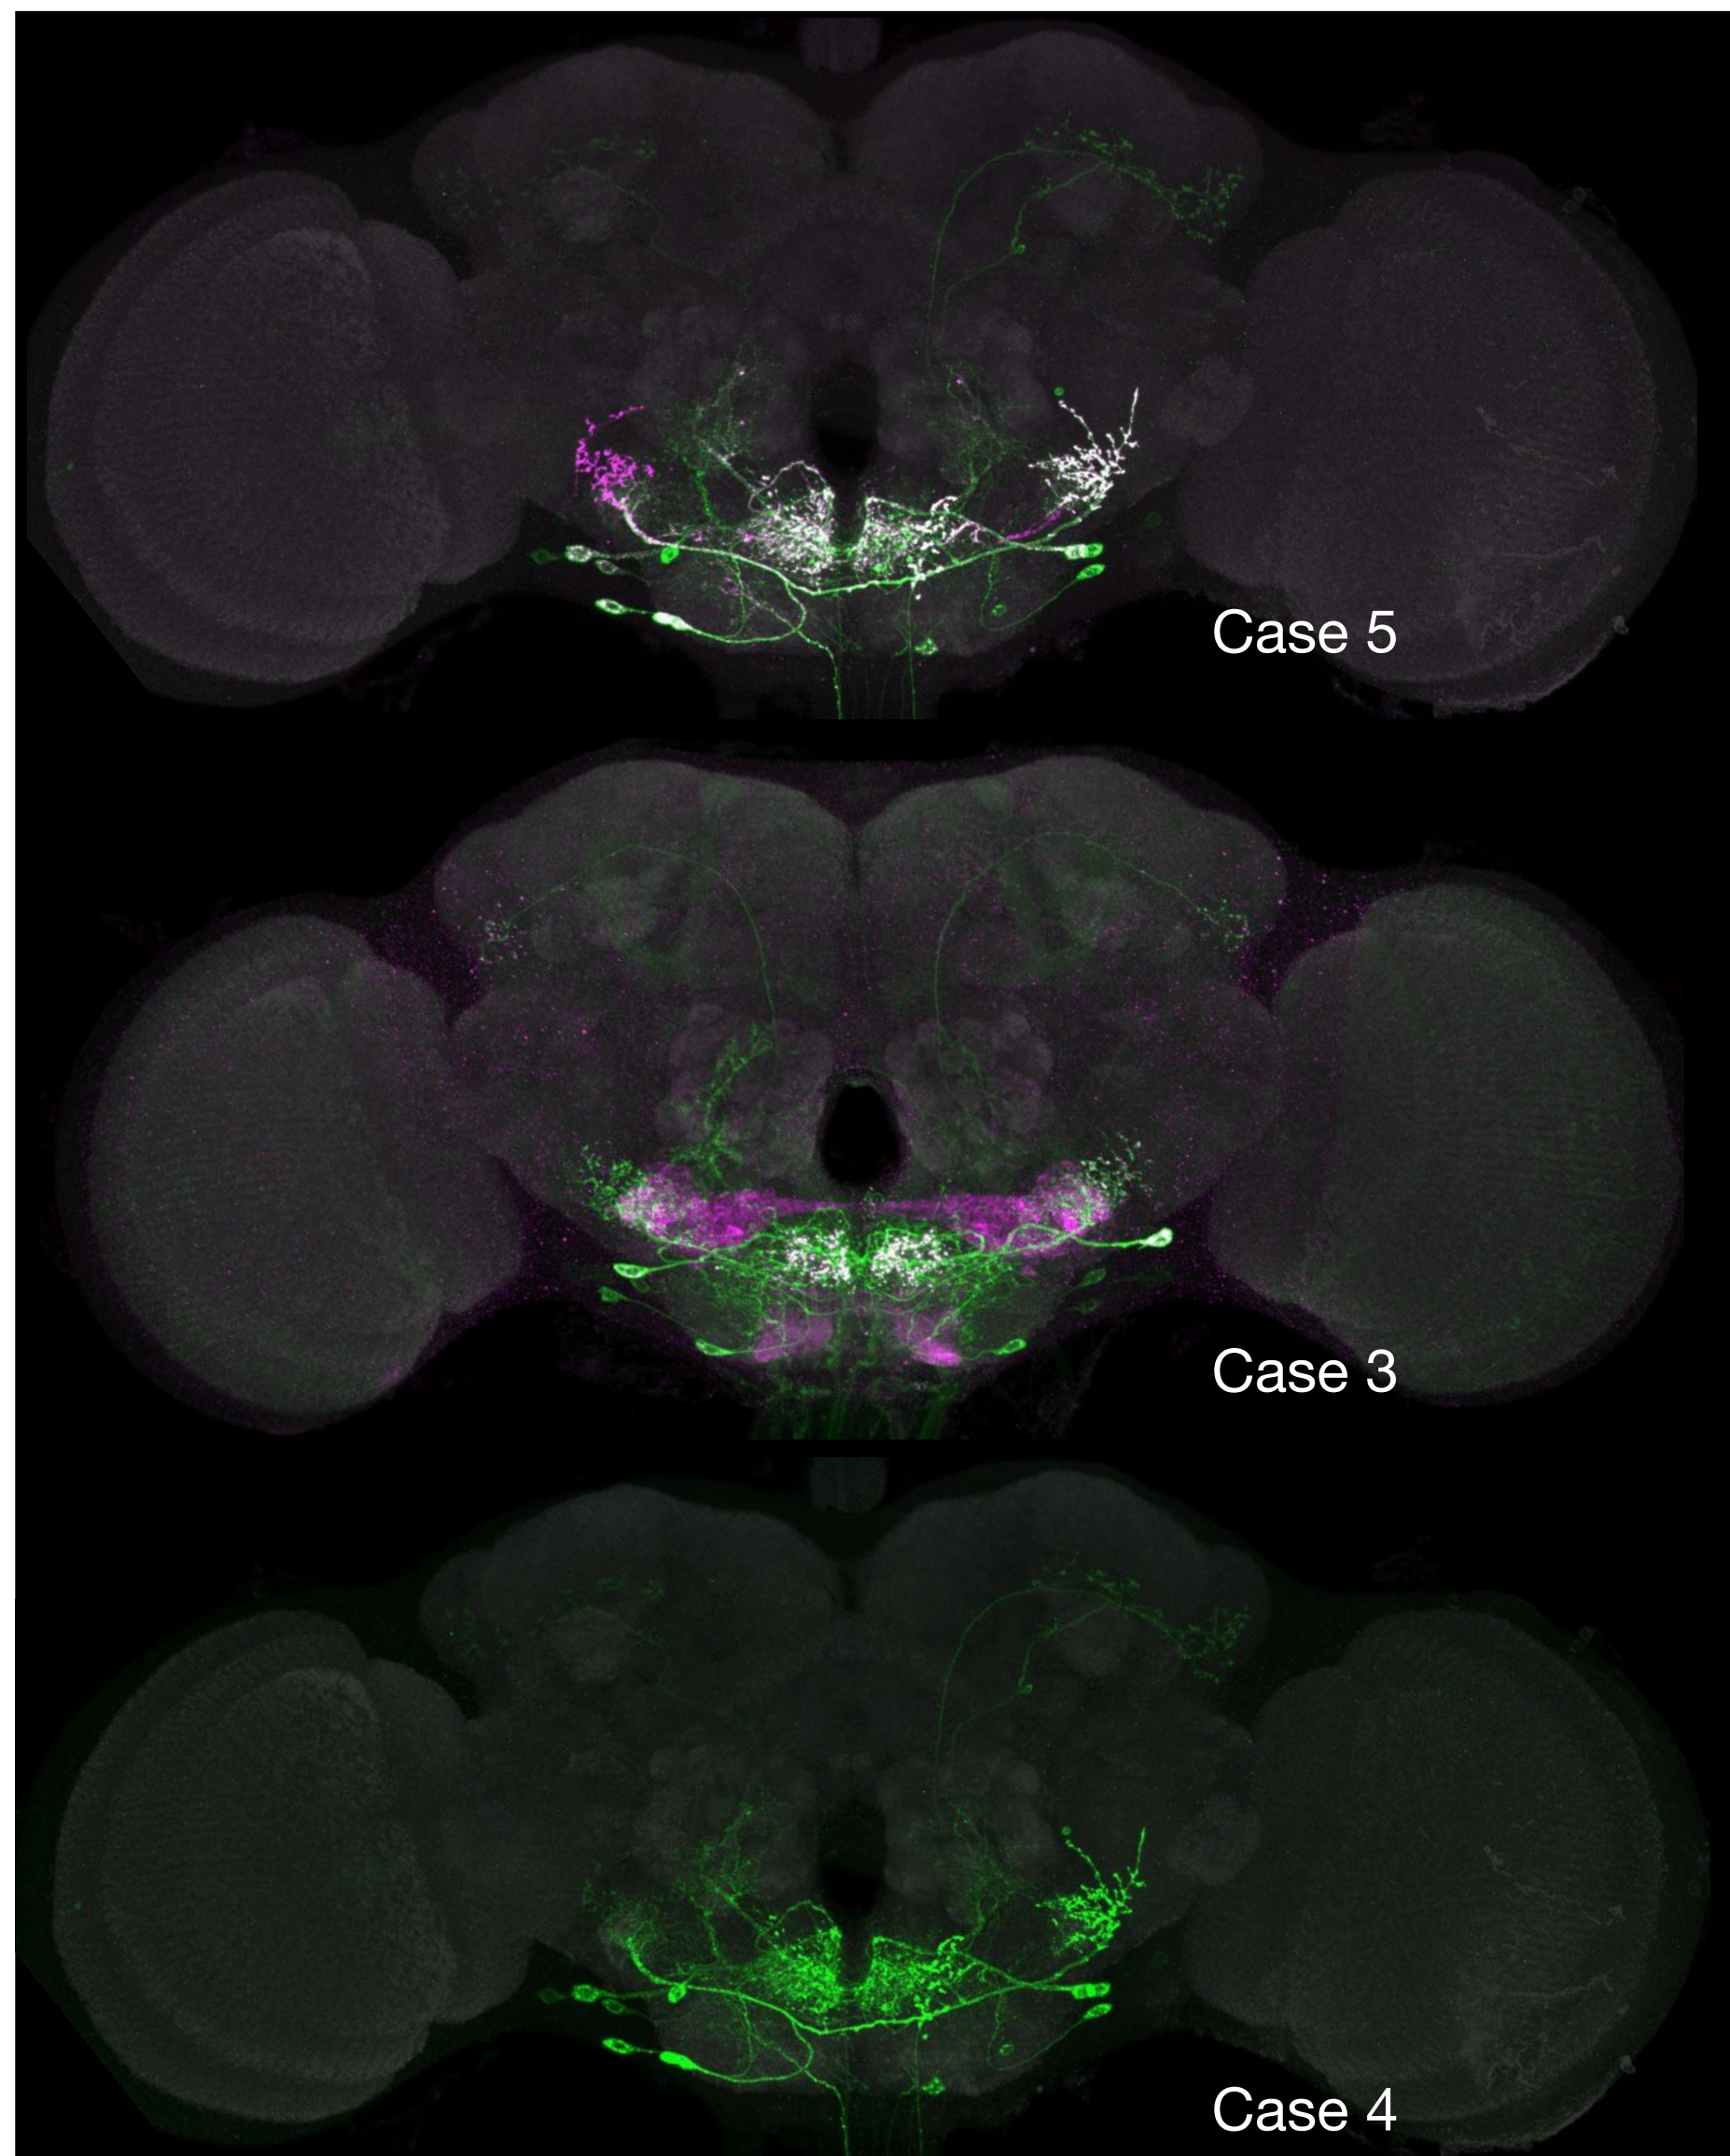

# MultiColor FlpOut (MCFO) subdivides GAL4 & split-GAL4 lines

Full GAL4 pattern with UAS-Chrimson-  
mVenus reporter

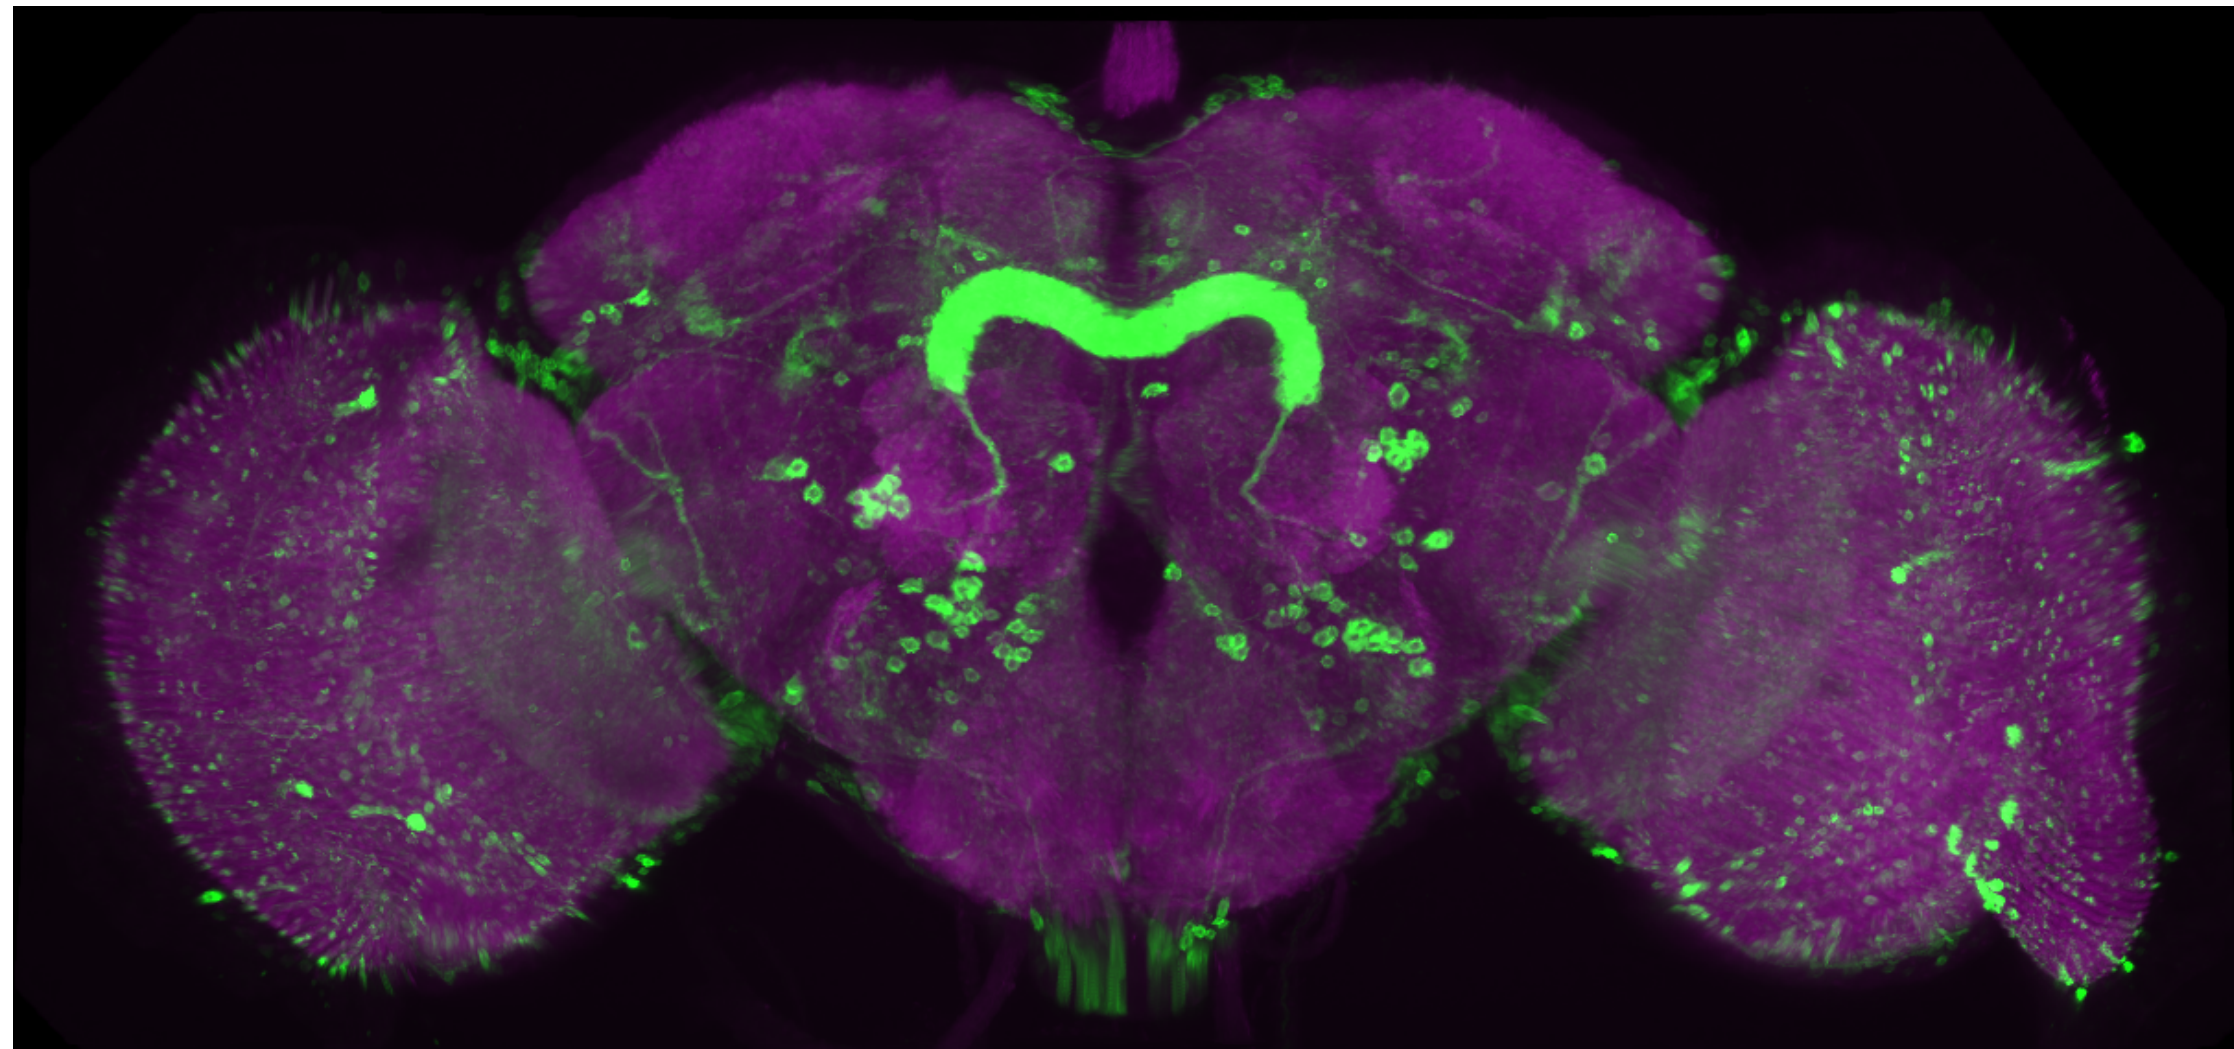

Subsets of neurons labeled in different  
colors by MultiColor FlpOut (MCFO)

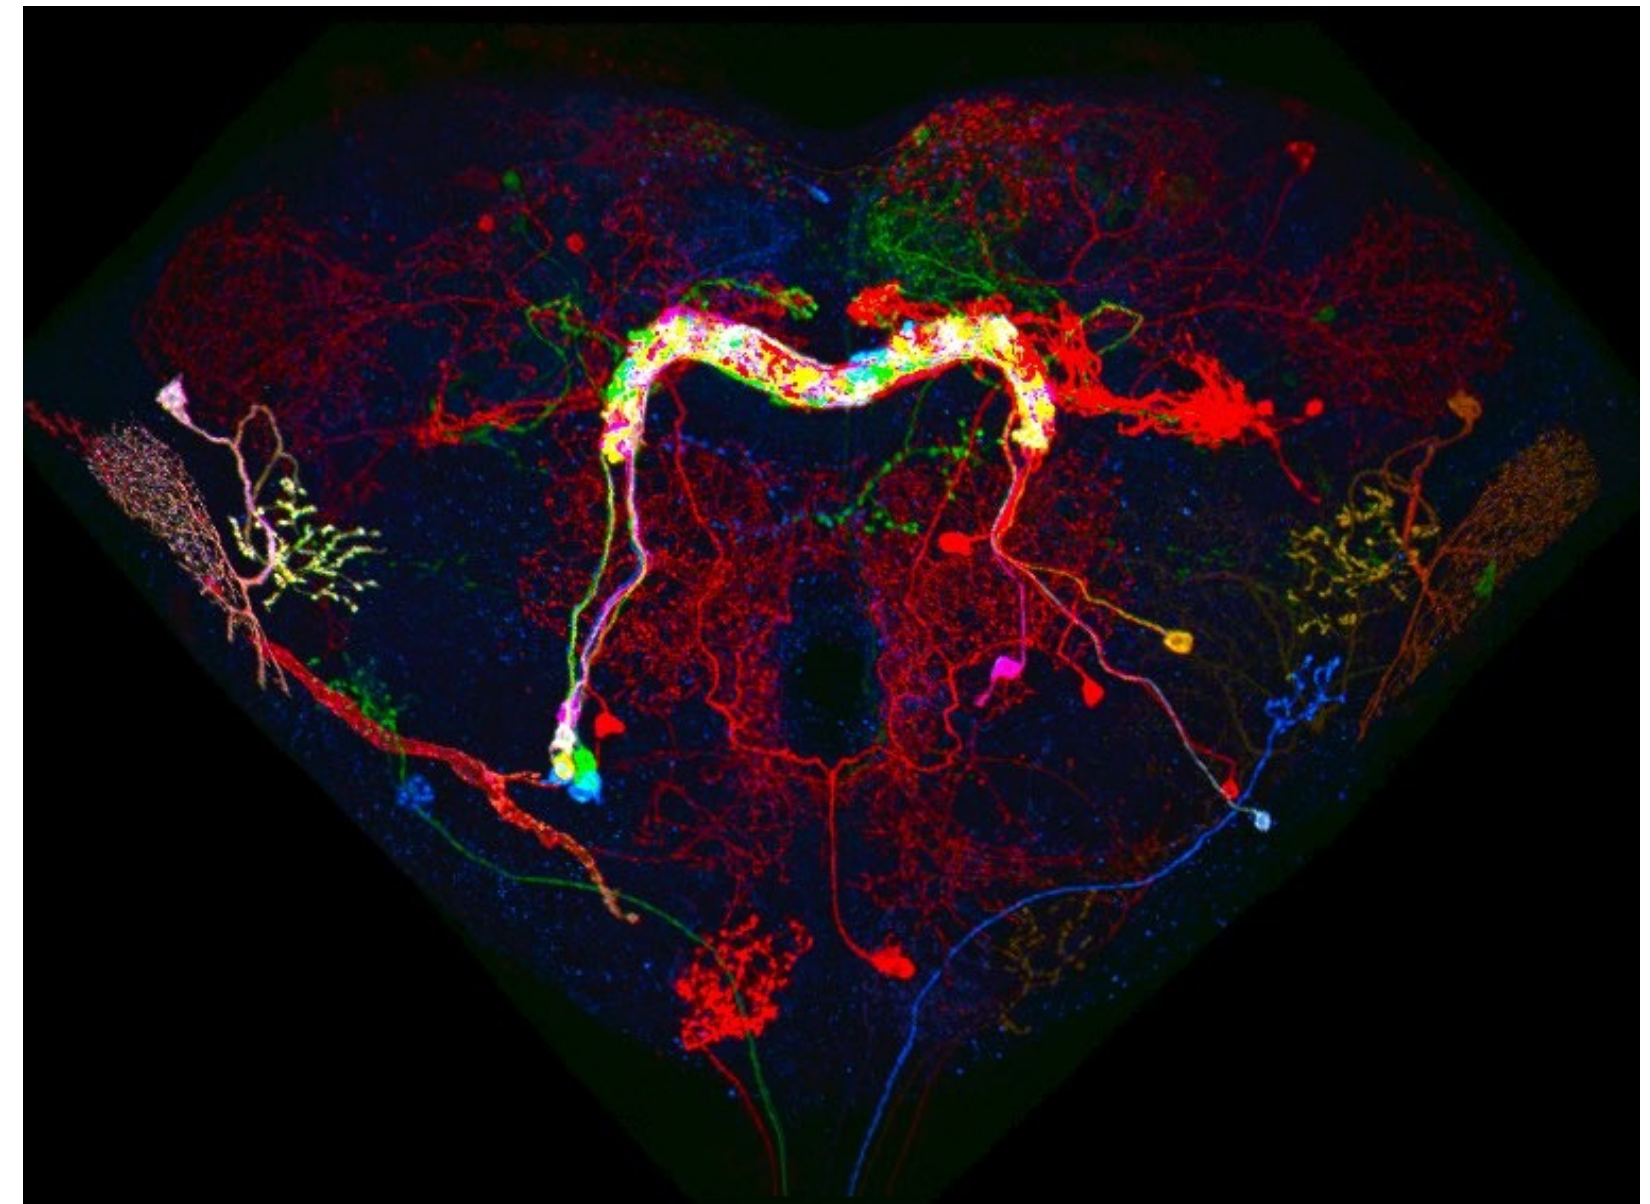

# Multicolor FlpOut (MCFO)

MCFO-1 UAS Reporter:  
 pBPhsFlp2::PEST in attP3;  
 pJFRC201-10XUAS>STOP>myr::smGFP-HA in  
 VK0005,  
 pJFRC240-10XUAS>STOP>myr::smGFP-V5-  
 THS-10XUAS>STOP>myr::smGFP-FLAG in  
 su(Hw)attP1

| Target            | Multicolor Flp-out |                     |                     |                     |
|-------------------|--------------------|---------------------|---------------------|---------------------|
|                   | Reference neuropil | neuronal membrane 1 | neuronal membrane 2 | neuronal membrane 3 |
| Genetic marker    | endogenous         | UAS>>HA             | UAS>>V5             | UAS>>FLAG           |
| Primary/Direct Ab | mouse nc82         | rabbit anti-HA      | DL550 anti-V5       | rat anti-FLAG       |
| Secondary Ab      | AF488 anti-mouse   | AF594 anti-rabbit   |                     | ATTO647N anti-rat   |

See Nern et al., 2015 for more details on MCFO variations

<https://doi.org/10.1073/pnas.1506763112>

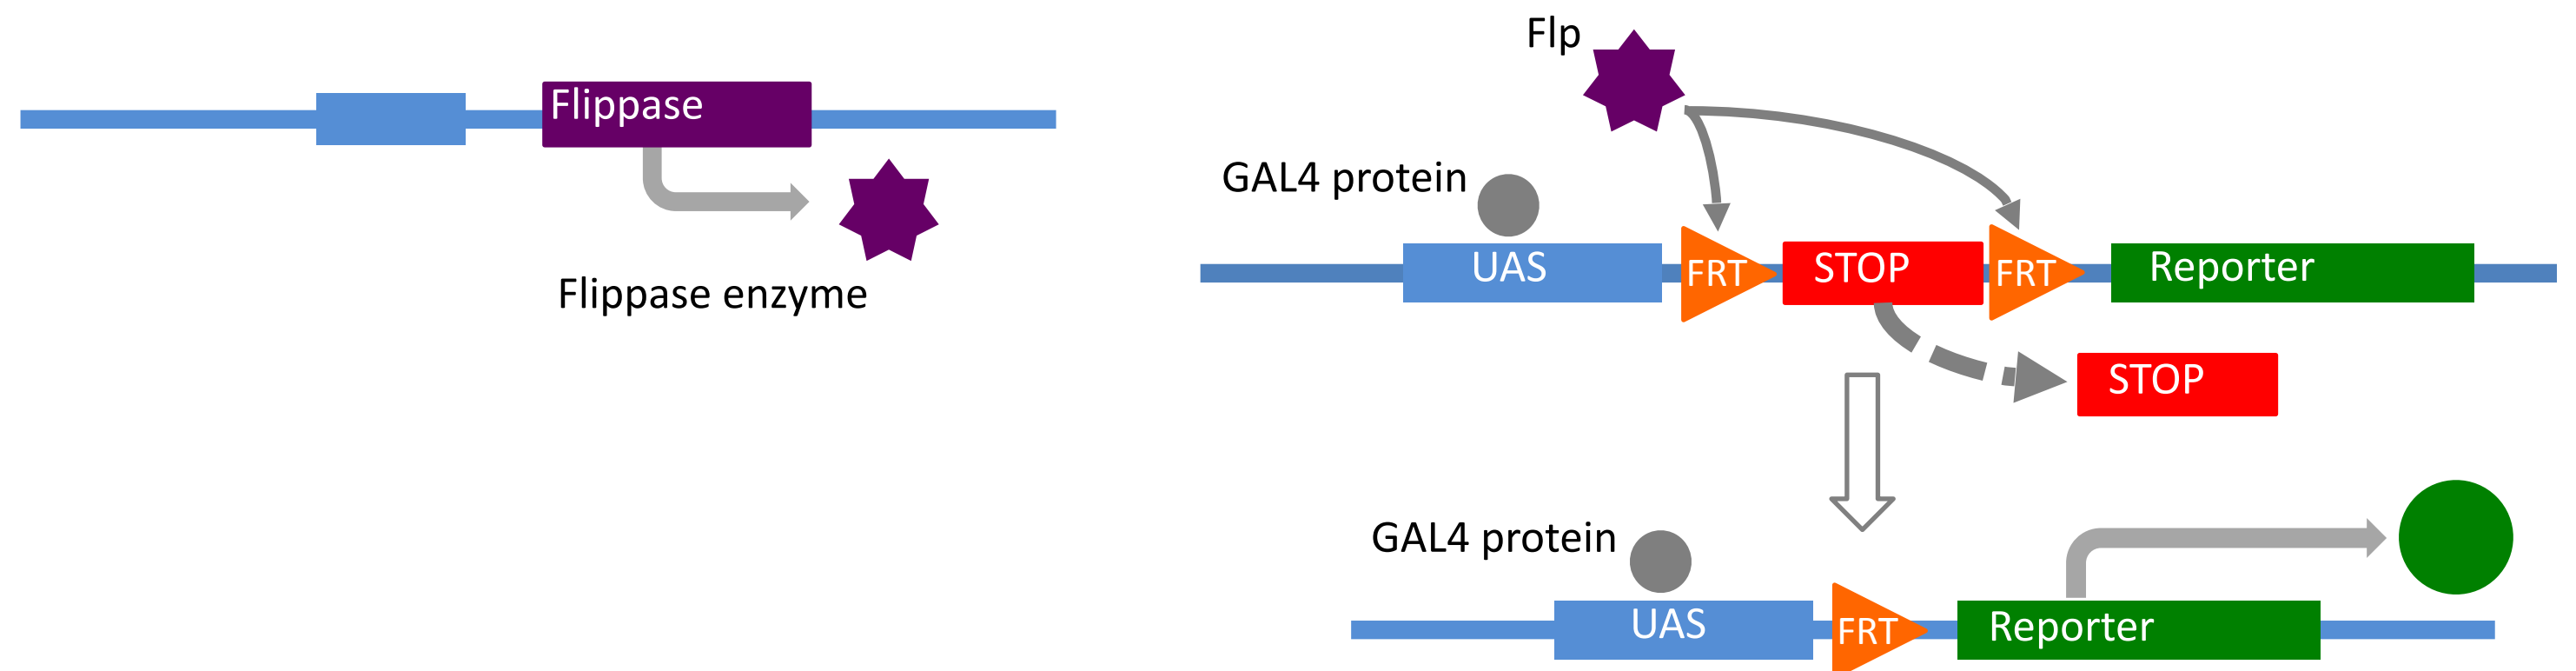

# 63X Adult Tiles - Brain

**L** – Left Optic Lobe

**V** – Ventral

**LD** – Left Dorsal

**RD** – Right Dorsal

**R** – Right Optic Lobe

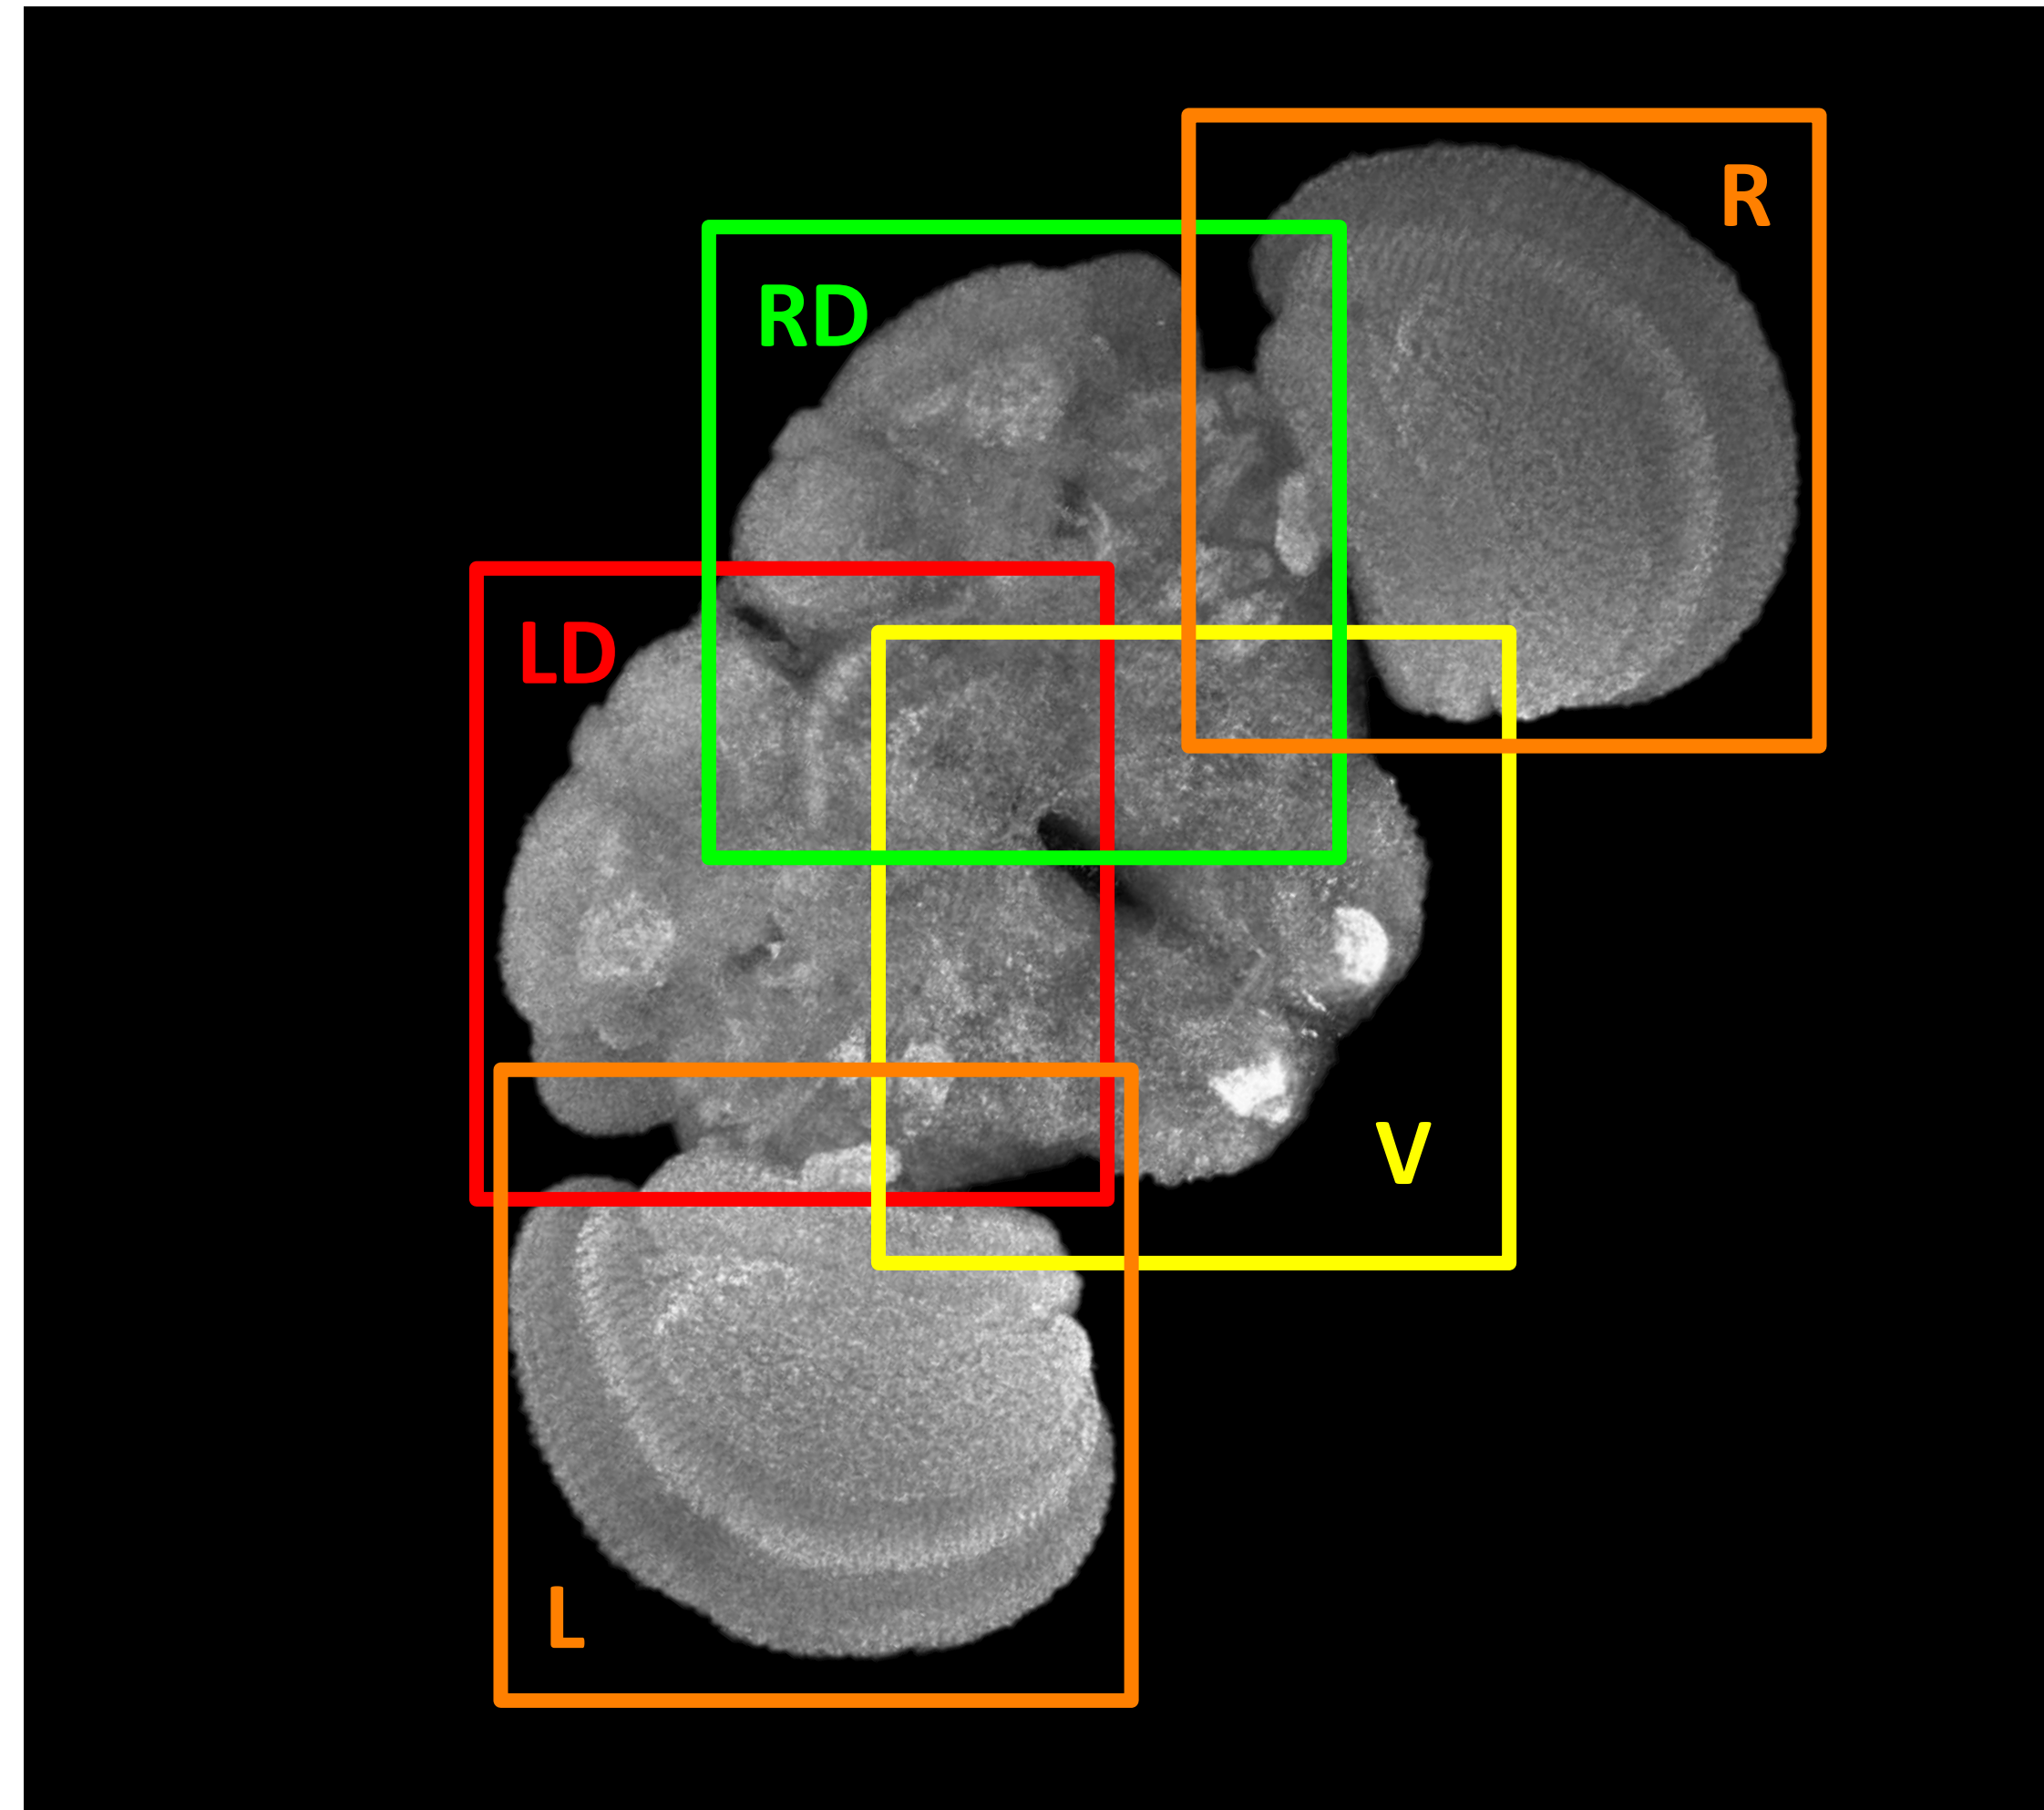

# 63X Adult Tiles – Additional Brain Tiles

**DM** – Dorsal Medial

**CEN** – Central

**LC** – Left Central

**RC** – Right Central

**LV** – Left Ventral

**RV** – Right Ventral

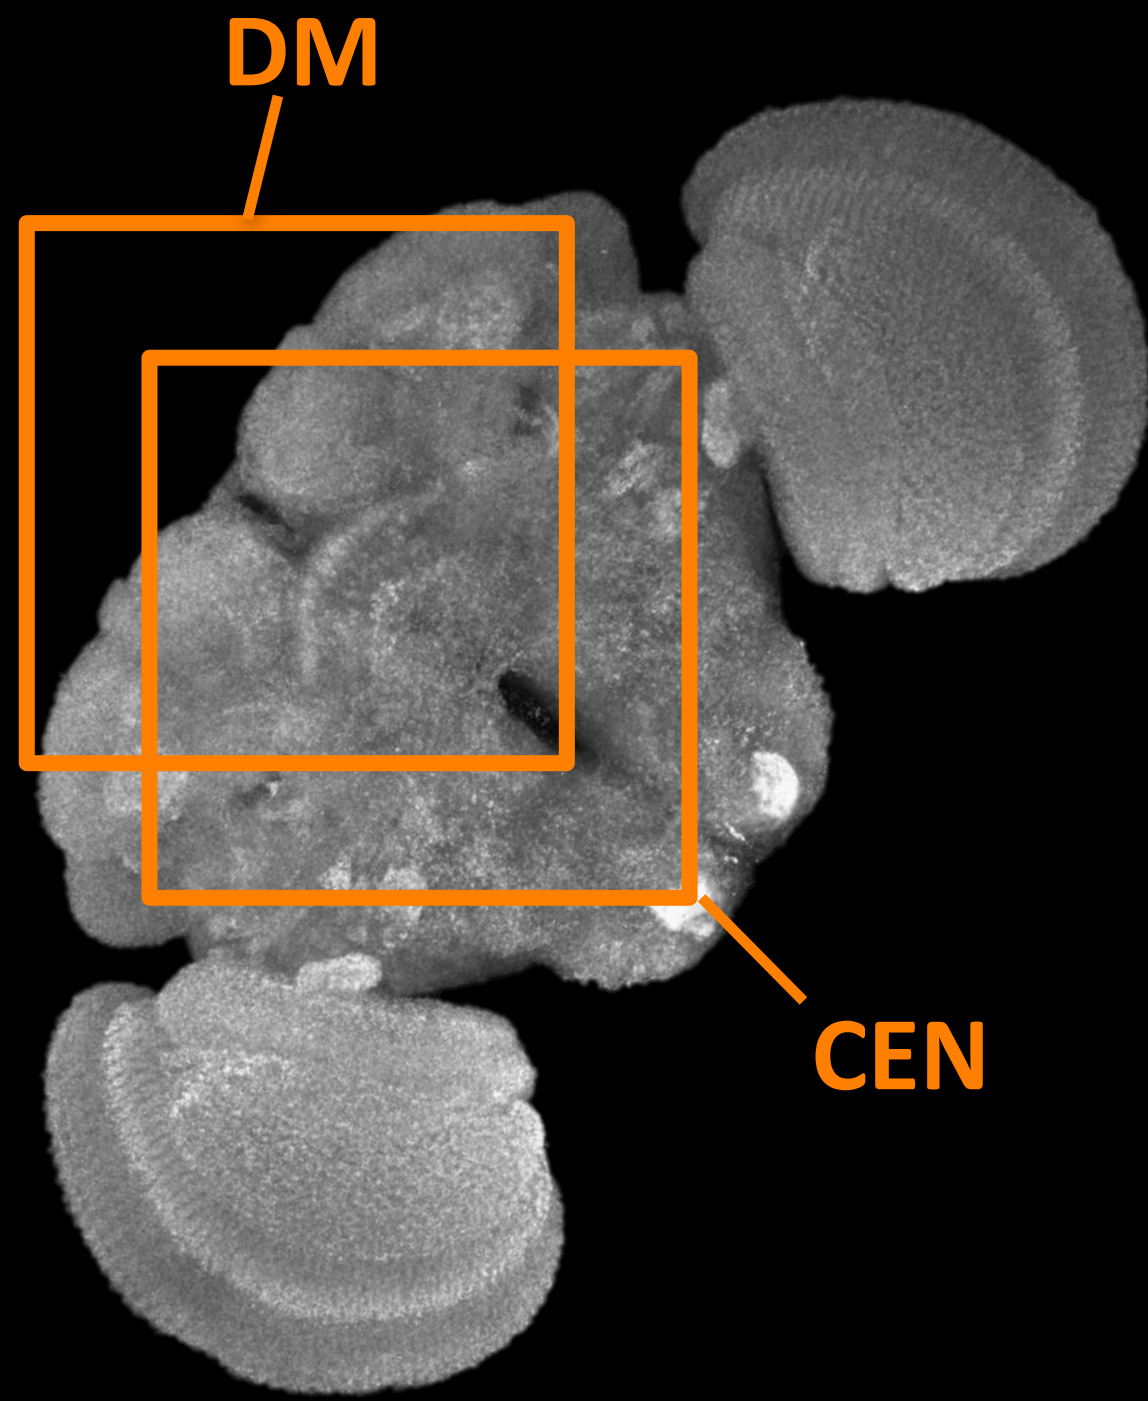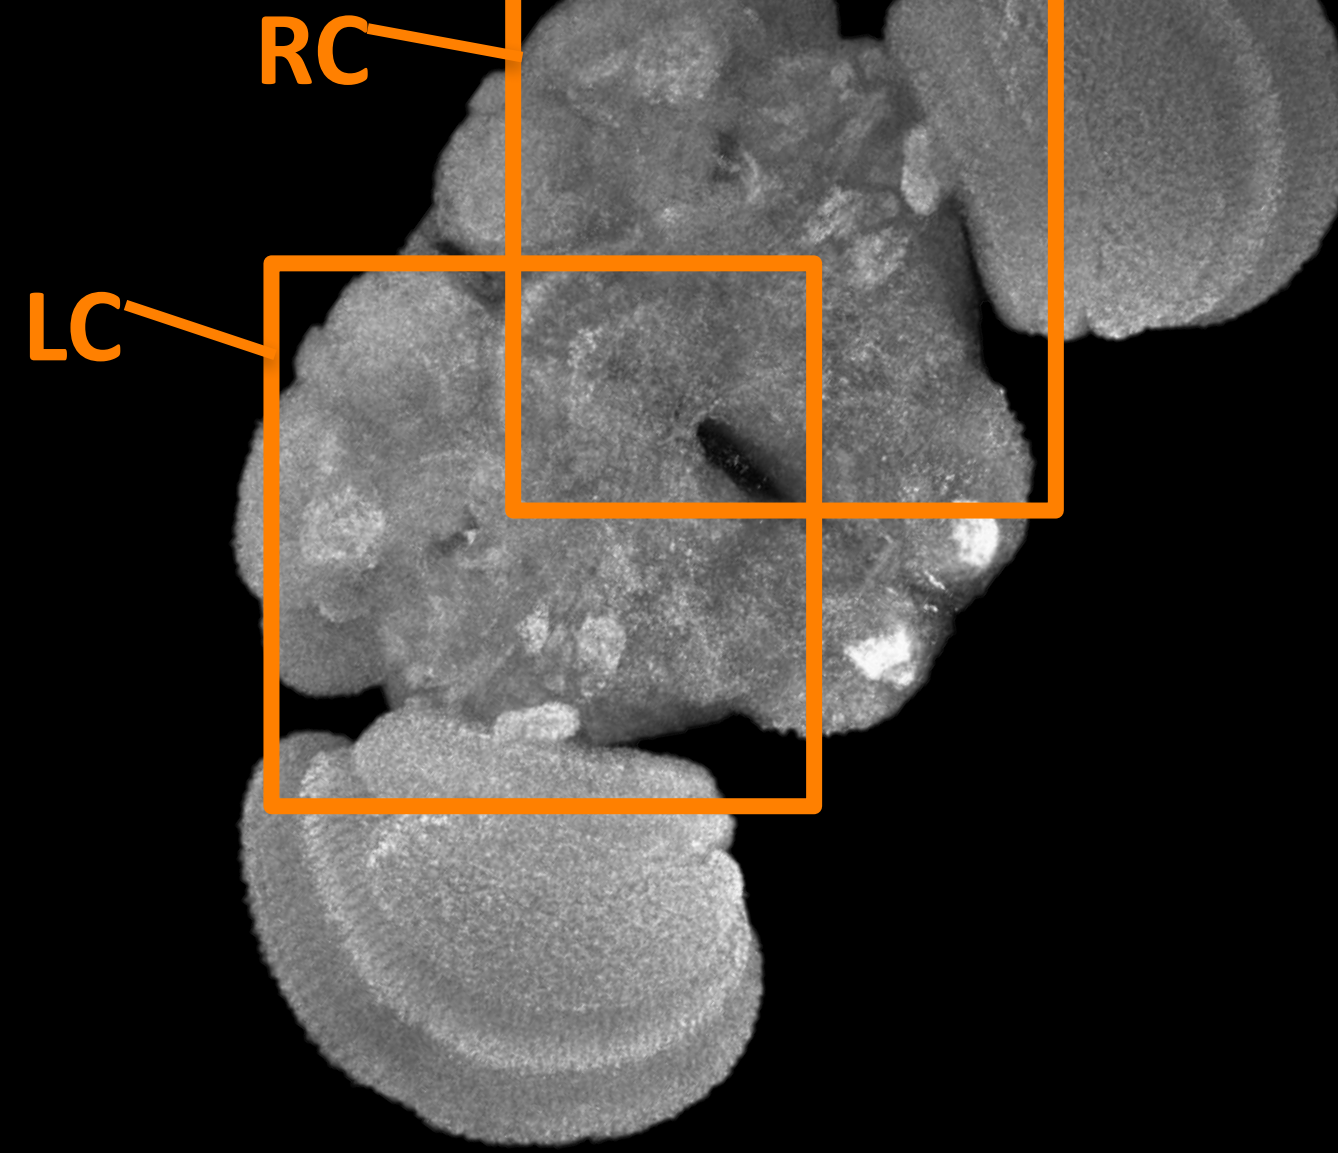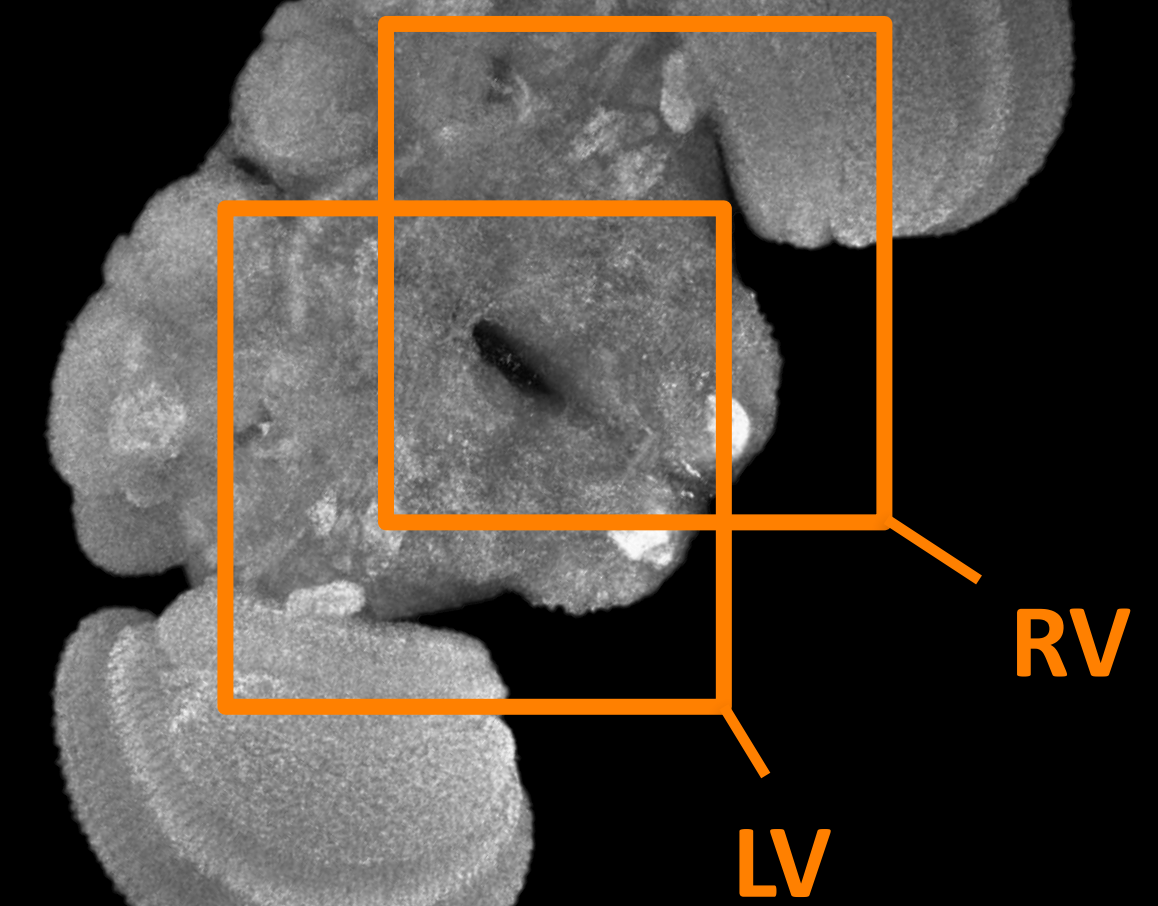

# 63X Adult Tiles - VNC

**PRO** – Prothoracic

**MES** – Mesothoracic

**META** – Metathoracic  
(sometimes covers Abd)

**ABD** – Abdominal

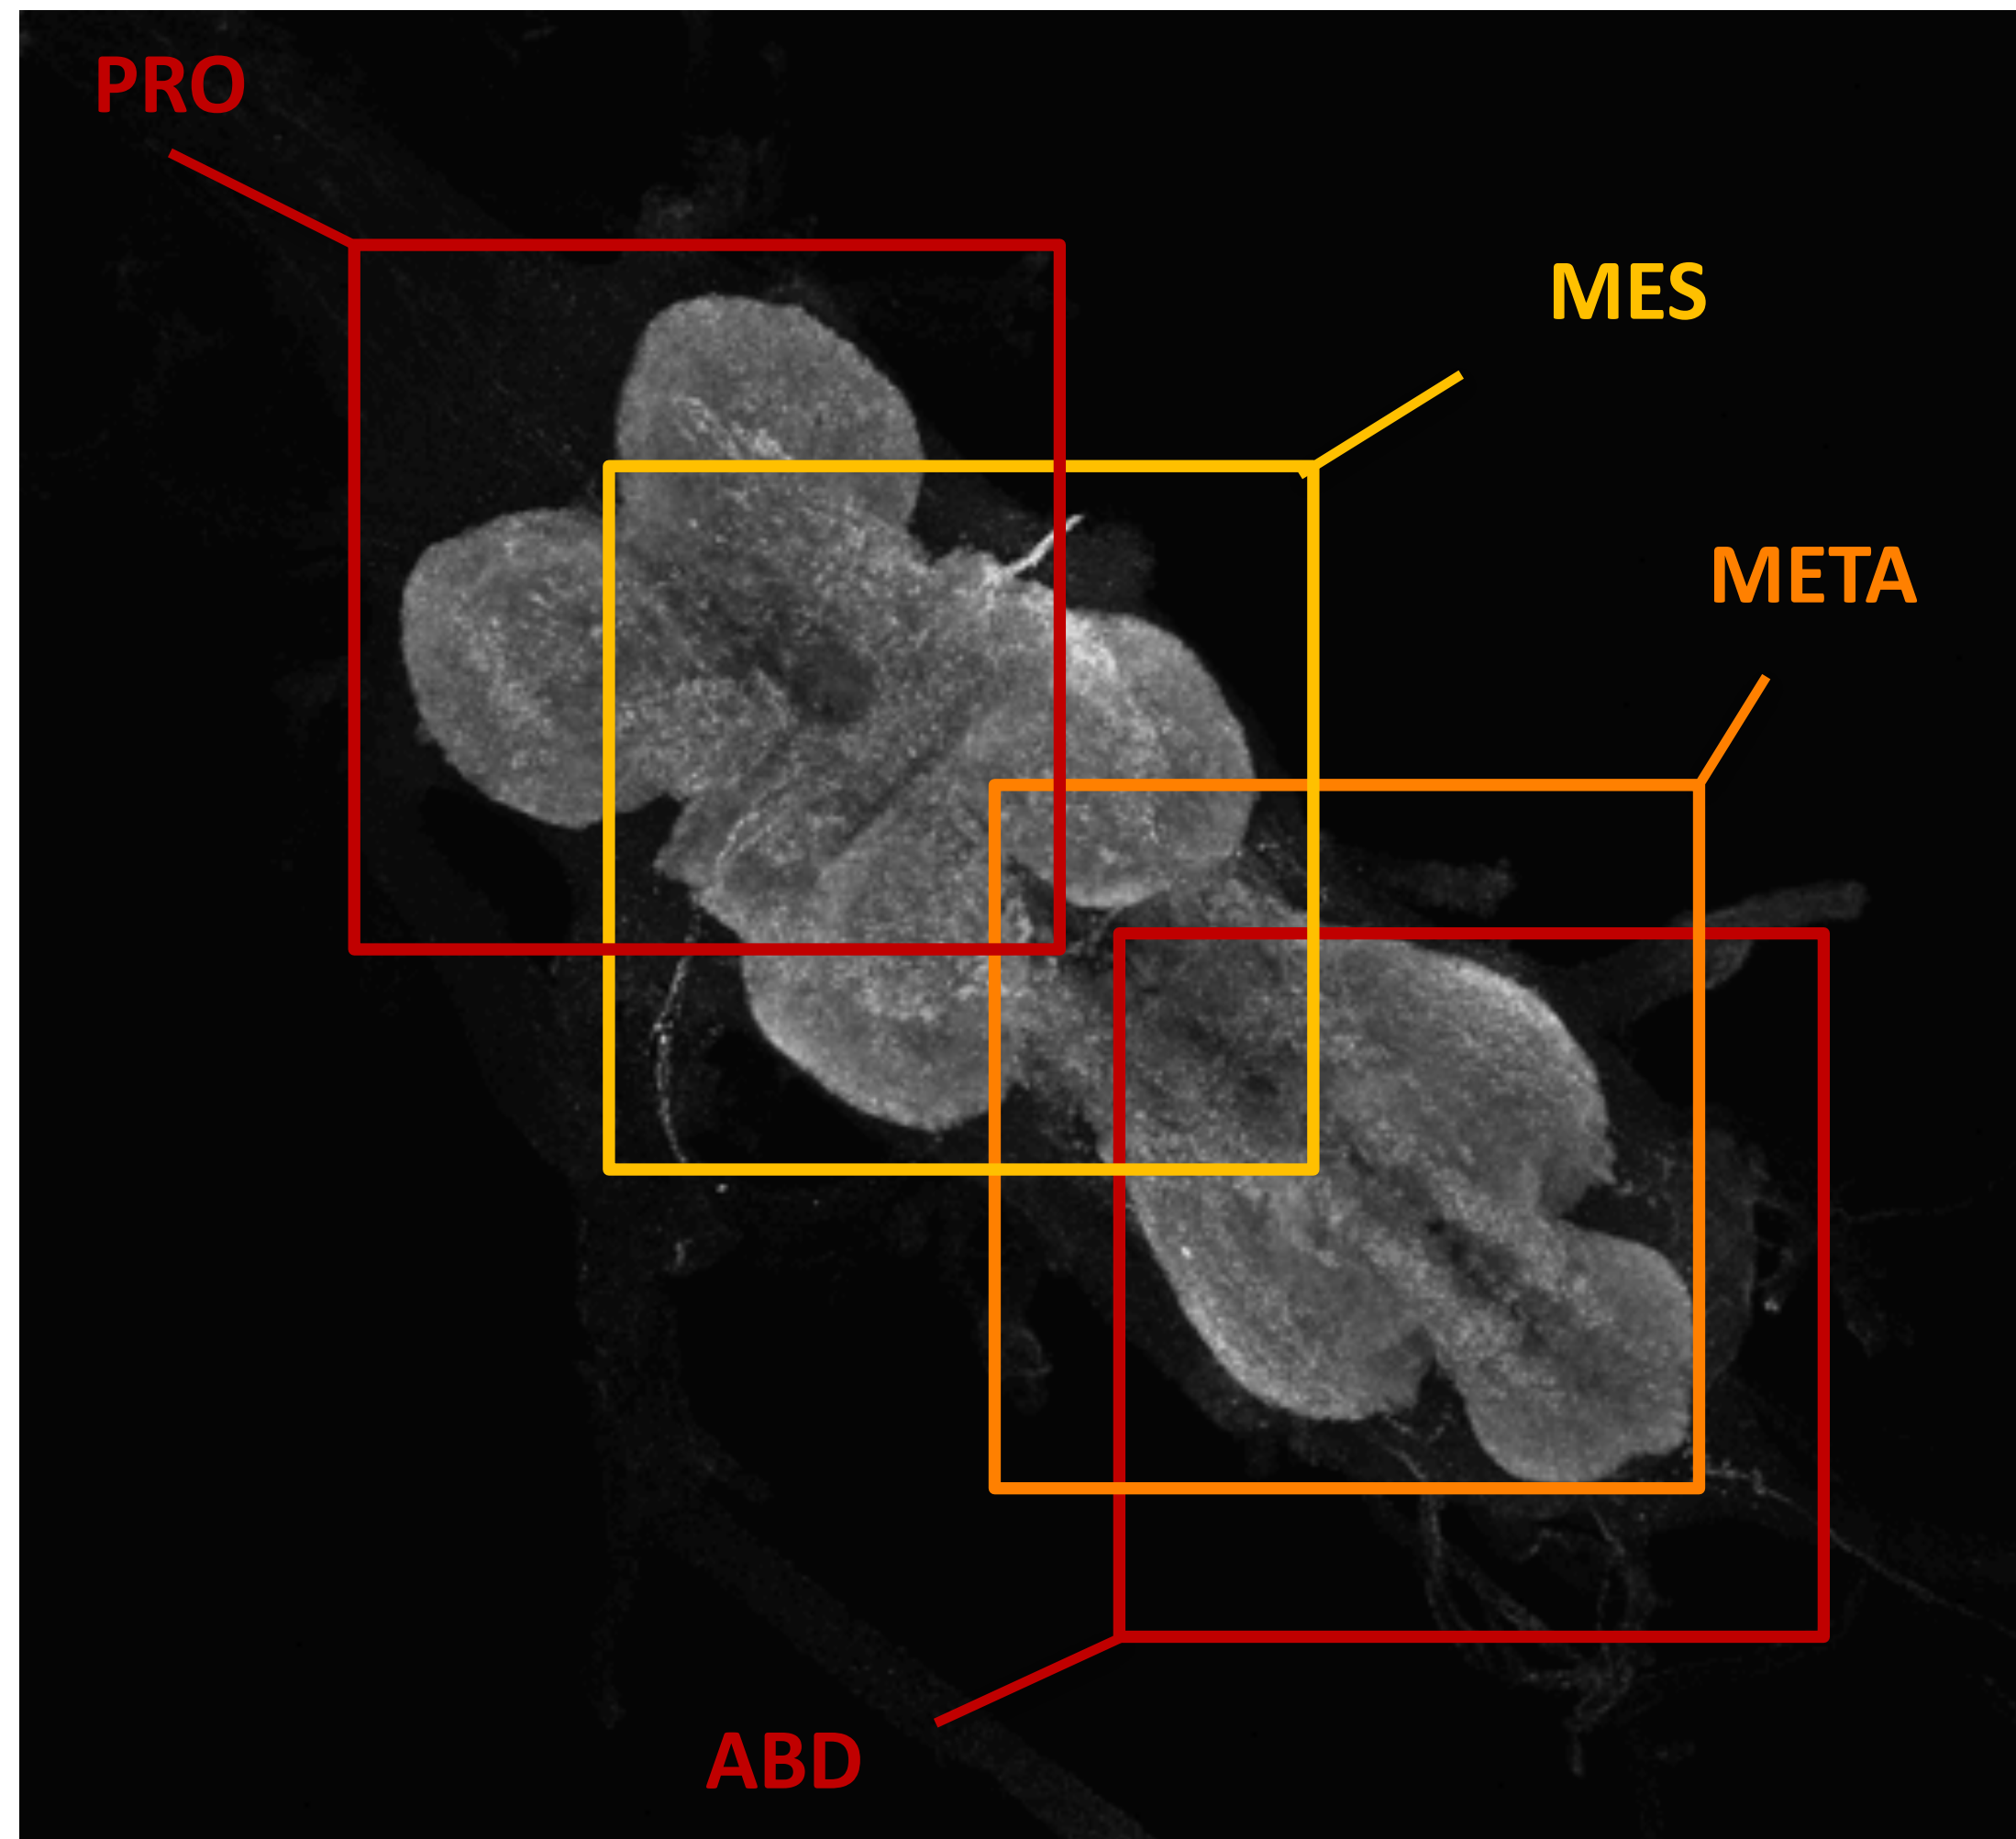



# 63X Adult Tiles - Neck

**NEC-Ant** – Anterior Neck

**NEC-Pos** – Posterior Neck

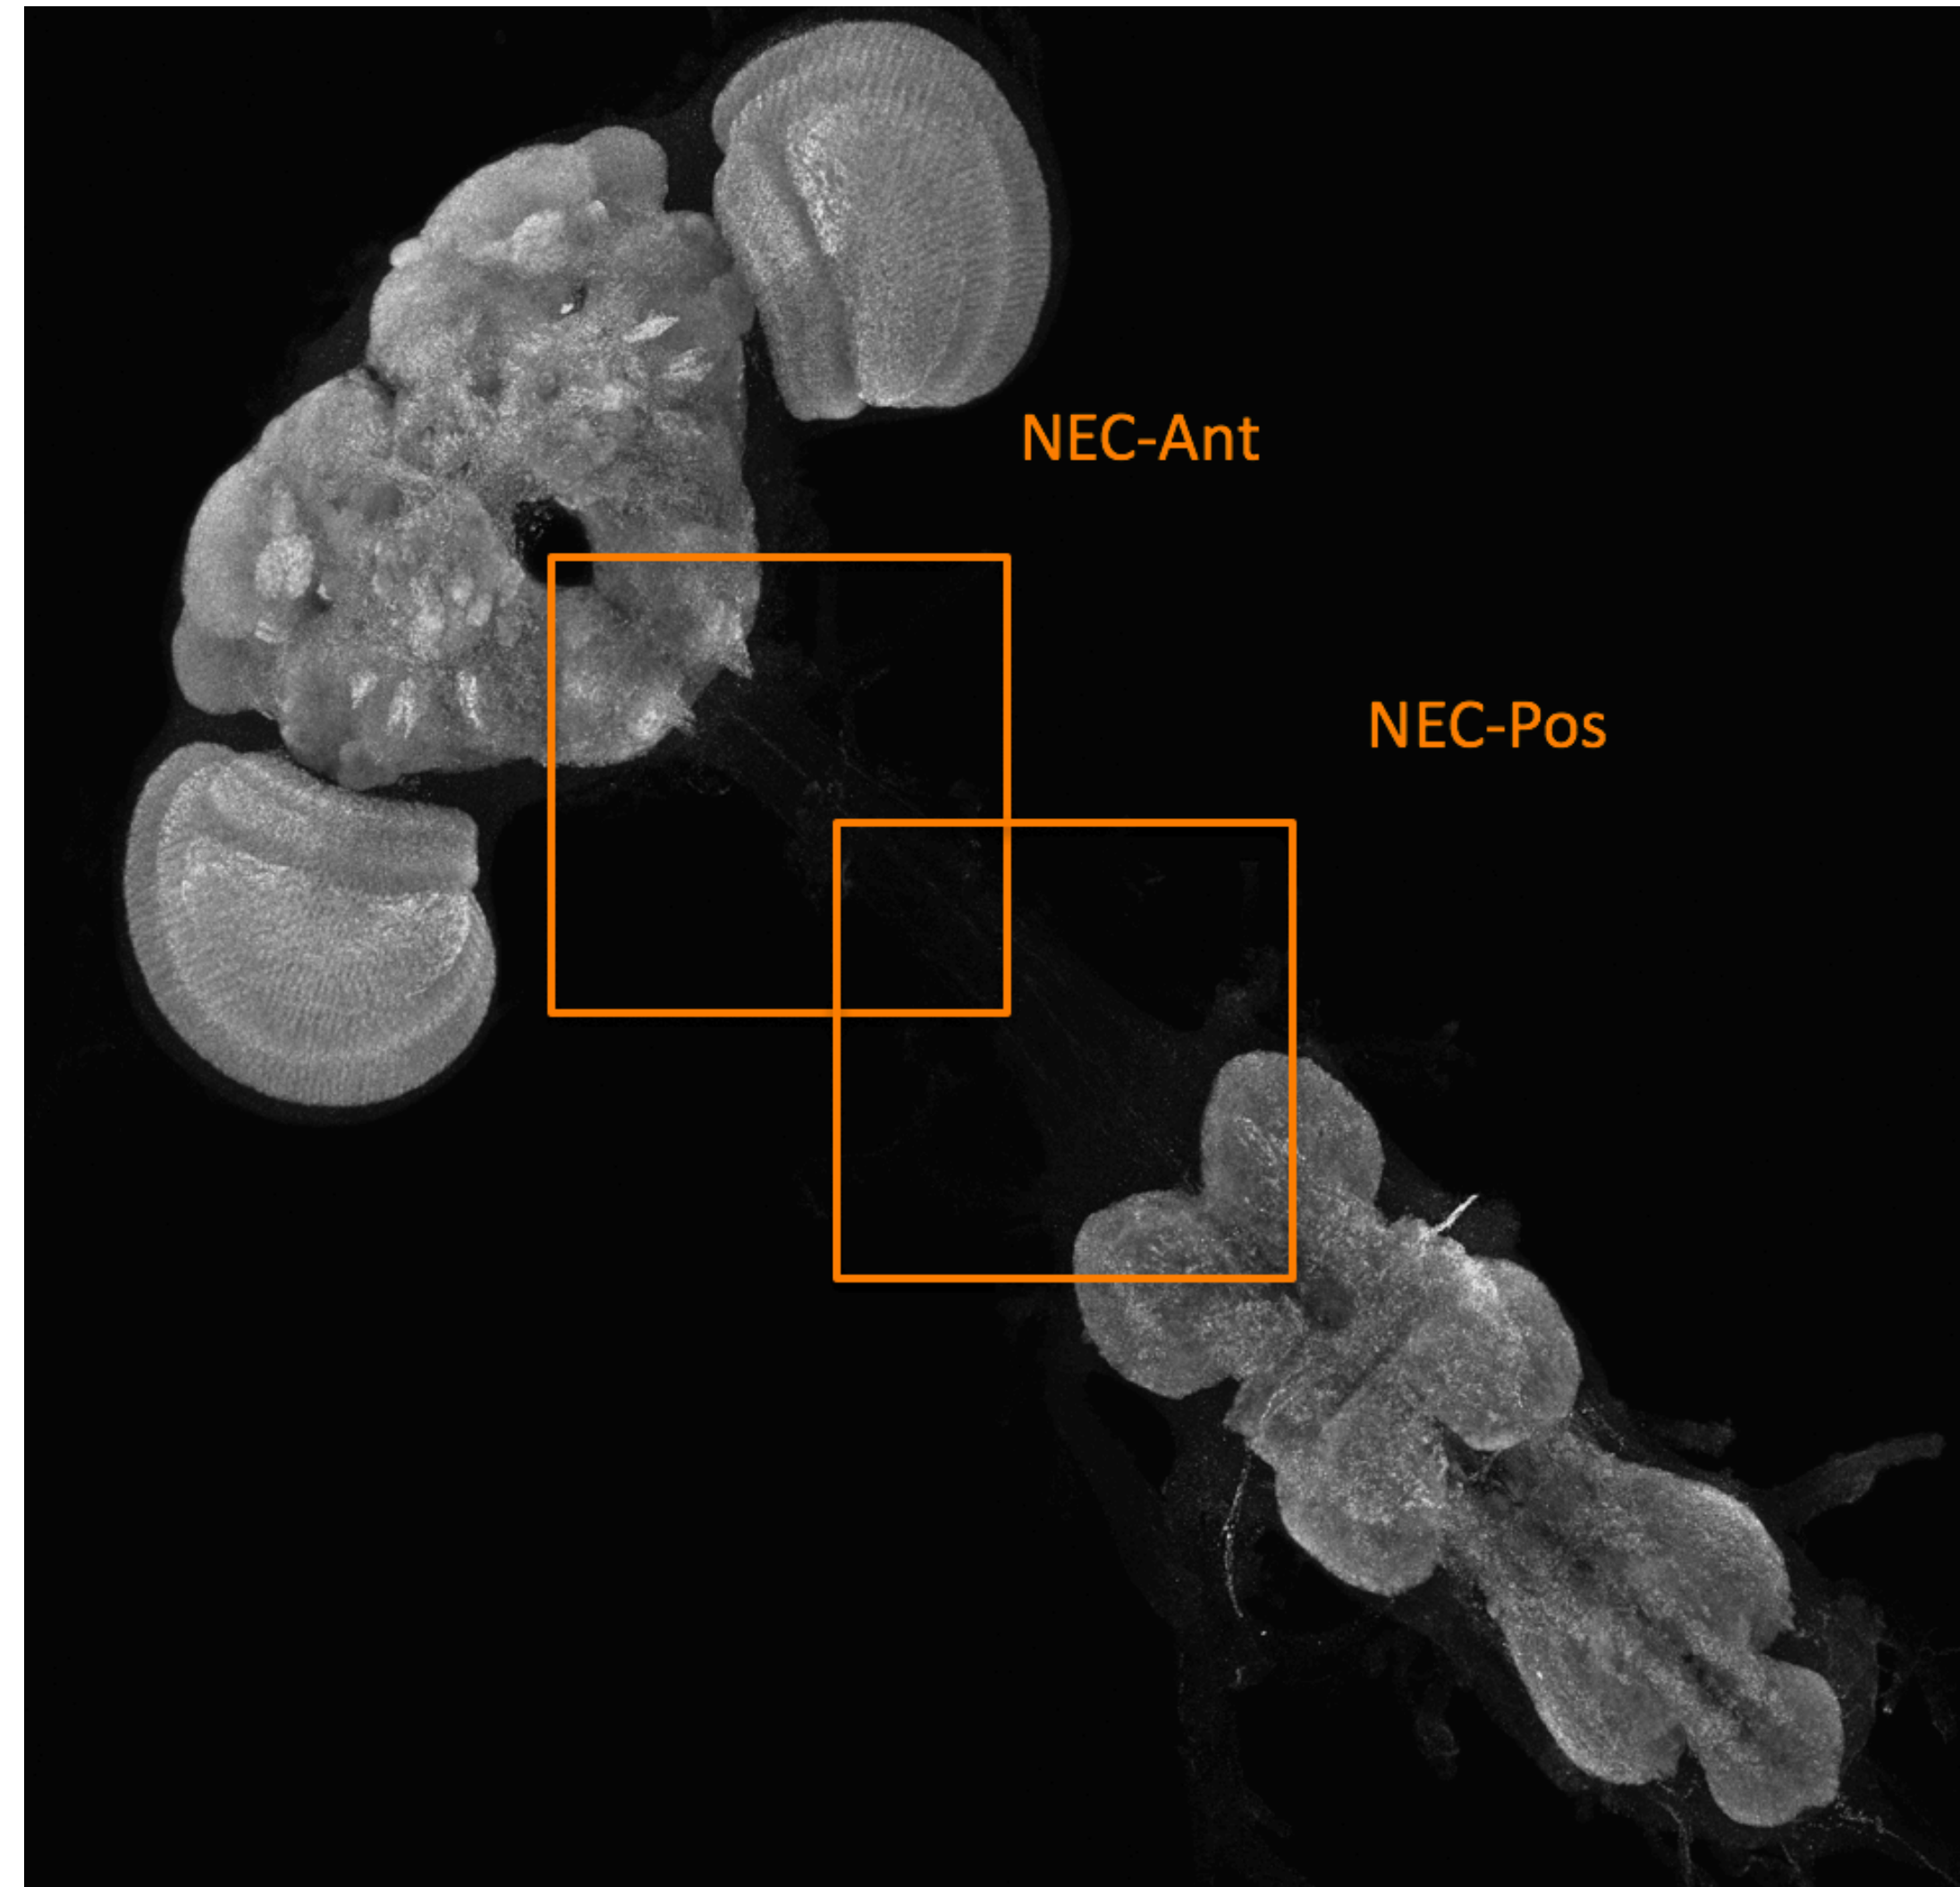

# 40X Adult Tiles - Brain & VNC

**BRAIN – 1 tile:**

**CEN** - Central brain

**VNC – 2 tiles:**

**PRO** - Prothoracic (anterior VNC)

**META** - Metathoracic (posterior VNC)

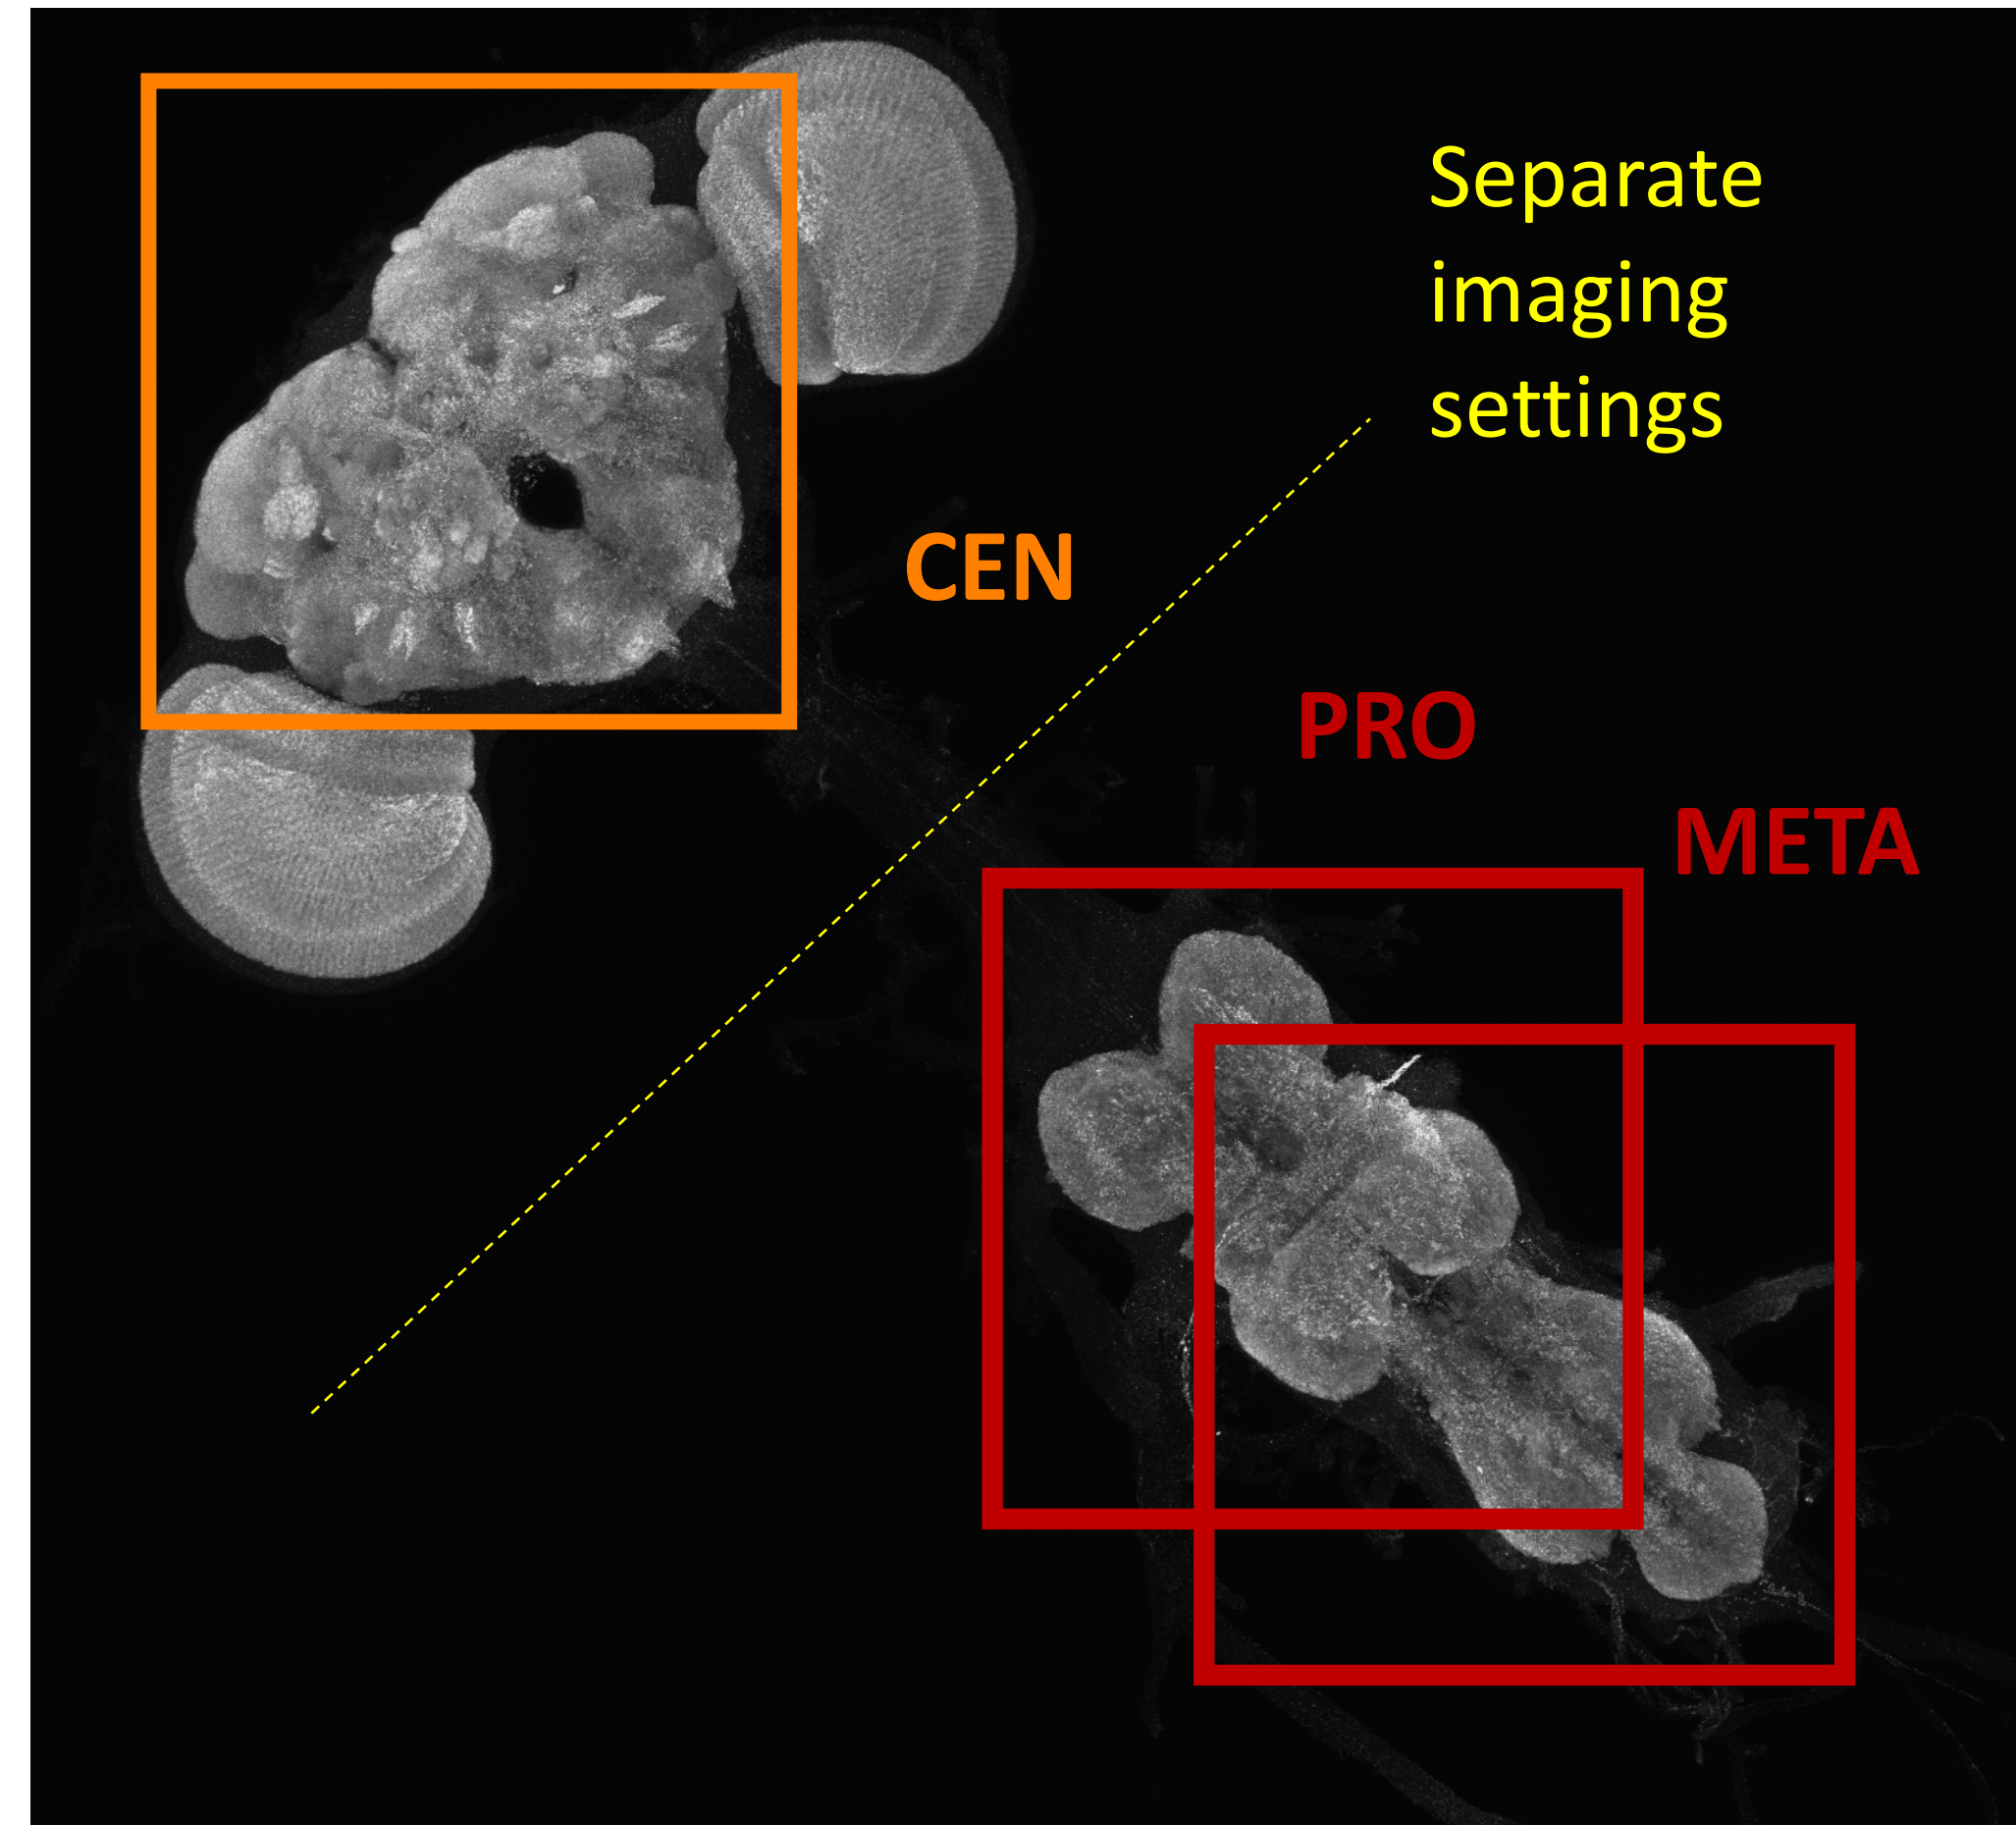

Supplement: supp2 [file elife-98405-supp2-v2.pdf]
